# Supplementary material for: Cas9 Contributes to Group B Streptococcal Colonization and Disease
Source: Front Microbiol. 2019 Aug 21;10:1930. doi: 10.3389/fmicb.2019.01930 (PMC6712506; doi:10.3389/fmicb.2019.01930)
Supplement: Supplementary file 5 [file Table_2.XLSX]

## Sheet: deseq2
id	function	baseMean	log2FoldChange	lfcSE	stat	pvalue	padj
RS00005	chromosomal_replication_initiator_protein_DnaA	1426.82	-0.296946	0.0849393	-3.49598	0.000472331	0.00110265
RS00010	DNA_polymerase_III_subunit_beta	2351.17	-0.526422	0.119541	-4.40368	1.06429e-05	3.05358e-05
RS00015	diacylglycerol_kinase	210.048	0.100078	0.173722	0.576082	0.56456	0.649582
RS00020	hypothetical_protein	77.4362	0.117372	0.227132	0.516754	0.605328	0.686311
RS00025	GTP-binding_protein_YchF	2754.58	0.0585181	0.0940765	0.622026	0.533925	0.622607
RS00030	aminoacyl-tRNA_hydrolase	123.227	0.0380816	0.172503	0.220759	0.82528	0.866072
RS00035	transcription-repair_coupling_factor	1520.27	0.143851	0.0841212	1.71004	0.0872579	0.133535
RS00040	hypothetical_protein	528.849	1.12058	0.107195	10.4536	1.41016e-25	1.46613e-24
RS00045	septum_formation_initiation_protein	430.434	0.700501	0.11875	5.89898	3.65759e-09	1.45798e-08
RS00050	hypothetical_protein	105.453	0.503605	0.182505	2.7594	0.00579074	0.0113287
RS00055	serine_hydrolase	1189.52	0.218565	0.0779266	2.80475	0.0050355	0.00993798
RS00060	tRNA(Ile)-lysidine_synthetase	896.36	0.190872	0.0877946	2.17407	0.0296998	0.0497958
RS00065	hypoxanthine-guanine_phosphoribosyltransferase	1712.38	0.270117	0.0815562	3.31203	0.000926213	0.00206885
RS00070	cell_division_protein_FtsH	6328.75	0.0476563	0.0721989	0.660069	0.509209	0.601332
RS00245	CHAP_domain-containing_protein	10349.1	-1.28606	0.0951497	-13.5162	1.25539e-41	2.38879e-40
RS00250	ribose-phosphate_pyrophosphokinase_1	5844.79	-0.03057	0.0927915	-0.329448	0.741817	0.798849
RS00255	aminotransferase_A	2672.77	2.55473	0.0886594	28.815	1.38968e-182	5.60597e-180
RS00260	DNA_repair_protein_RecO	3276.26	2.42797	0.111933	21.6913	2.47751e-104	3.84395e-102
RS00265	CPBP_family_intramembrane_metalloprotease	12.962	0.430251	0.418458	1.02818	0.303864	0.395415
RS00270	phosphate_acyltransferase	1355.55	0.727833	0.0898954	8.09644	5.65886e-16	3.4905e-15
RS00275	acyl_carrier_protein	2117.07	0.426293	0.0849784	5.01649	5.26251e-07	1.74008e-06
RS00280	phosphoribosylaminoimidazolesuccinocarboxamide_synthase	17.9812	0.386573	0.388846	0.994152	0.320149	0.413406
RS00285	phosphoribosylformylglycinamidine_synthase	90.0019	-0.939452	0.214993	-4.36968	1.24426e-05	3.53475e-05
RS00290	amidophosphoribosyltransferase	56.7289	-1.04203	0.285291	-3.65252	0.000259683	0.000625037
RS00295	phosphoribosylformylglycinamidine_cyclo-ligase	43.5279	-0.743253	0.278864	-2.66529	0.00769219	0.0146646
RS00300	phosphoribosylglycinamide_formyltransferase	25.8226	-1.13549	0.328432	-3.4573	0.000545615	0.00125916
RS00305	GNAT_family_acetyltransferase	89.3592	0.242351	0.254051	0.953947	0.34011	0.435557
RS00310	bifunctional_phosphoribosylaminoimidazolecarboxamide_formyltransferase/inosine_monophosphate_cyclohydrolase	347.833	0.346772	0.12398	2.79699	0.00515808	0.01016
RS00315	hypothetical_protein	47.0513	1.35843	0.25943	5.2362	1.63917e-07	5.66293e-07
RS00320	peptidoglycan-binding_protein_LysM	1832.07	0.467014	0.0981528	4.75803	1.95492e-06	6.01995e-06
RS00325	N-acetylmannosamine-6-phosphate_2-epimerase	11.9511	0.442933	0.423205	1.04662	0.295277	0.385484
RS00330	sugar_ABC_transporter_substrate-binding_protein	16.3257	1.03825	0.393348	2.63953	0.00830209	0.0156647
RS00335	sugar_ABC_transporter_permease	4.75864	-0.0607038	0.532273	-0.114046	0.909201	0.936598
RS00340	sugar_ABC_transporter_permease	5.37144	0.404981	0.539258	0.750996	0.452655	0.549341
RS00345	hypothetical_protein	4.31335	-0.0217294	0.550621	-0.0394635	0.968521	0.977731
RS00350	hypothetical_protein	8.903	0.652389	0.481992	1.35353	0.175888	0.246725
RS00355	N-acetylneuraminate_lyase	10.4205	0.497109	0.497278	0.999661	0.317475	0.410742
RS00360	sugar_kinase	11.8111	0.709309	0.421546	1.68264	0.0924457	0.140349
RS00365	acetylxylan_esterase	27.9868	0.253629	0.313992	0.807757	0.41923	0.518063
RS00370	MurR/RpiR_family_transcriptional_regulator	400.601	-0.531874	0.141578	-3.75677	0.000172122	0.000428606
RS00375	phosphoribosylamine--glycine_ligase	27.5735	-0.583345	0.300231	-1.94299	0.0520172	0.0834676
RS00380	5-(carboxyamino)imidazole_ribonucleotide_mutase	11.3247	-1.00989	0.429226	-2.35283	0.0186312	0.0330511
RS00385	5-(carboxyamino)imidazole_ribonucleotide_synthase	34.3951	-0.694243	0.295262	-2.35128	0.0187091	0.0331311
RS00390	hypothetical_protein	383.207	-0.237038	0.117146	-2.02344	0.0430274	0.0698762
RS00395	hypothetical_protein	257.6	-0.484796	0.157641	-3.07532	0.00210277	0.00437161
RS00400	adenylosuccinate_lyase	808.146	-0.511953	0.0848306	-6.035	1.58963e-09	6.47735e-09
RS00405	transcriptional_regulator	96.1145	-0.00760704	0.192522	-0.0395126	0.968482	0.977731
RS00410	Holliday_junction_branch_migration_DNA_helicase_RuvB	890.436	0.111407	0.111534	0.998857	0.317864	0.410982
RS00415	hypothetical_protein	710.935	0.516079	0.131782	3.91617	8.99662e-05	0.000231162
RS00420	membrane_protein	607.921	0.433245	0.124094	3.49127	0.000480722	0.00111965
RS00425	acyltransferase	4982.64	0.275924	0.0800787	3.44566	0.000569665	0.00131017
RS00430	bifunctional_acetaldehyde-CoA/alcohol_dehydrogenase	2568.36	0.0362615	0.195652	0.185337	0.852965	0.889571
RS00435	zinc-dependent_alcohol_dehydrogenase	228.901	0.378327	0.204625	1.84888	0.064475	0.101519
RS00440	threonine_synthase	737.839	0.636381	0.117159	5.43176	5.58004e-08	2.00981e-07
RS00445	MATE_family_efflux_transporter	819.889	0.35559	0.0948843	3.74762	0.000178523	0.000442903
RS00450	30S_ribosomal_protein_S10	4357.9	-1.32084	0.0672492	-19.641	6.90516e-86	4.64257e-84
RS00455	50S_ribosomal_protein_L3	6738.71	-1.30981	0.0762355	-17.1811	3.67937e-66	1.27953e-64
RS00460	50S_ribosomal_protein_L4	8973.34	-1.25132	0.0772869	-16.1906	5.87297e-59	1.74203e-57
RS00465	50S_ribosomal_protein_L23	4772.75	-1.20981	0.0624997	-19.3571	1.77628e-83	1.05375e-81
RS00470	50S_ribosomal_protein_L2	12905.1	-1.2547	0.0616714	-20.345	5.1437e-92	4.9404e-90
RS00475	30S_ribosomal_protein_S19	5277.31	-1.32297	0.067391	-19.6312	8.36984e-86	5.4458e-84
RS00480	50S_ribosomal_protein_L22	8383.74	-1.25579	0.0664558	-18.8966	1.21745e-79	6.139e-78
RS00485	30S_ribosomal_protein_S3	12619	-1.25242	0.0741204	-16.8971	4.72521e-64	1.53722e-62
RS00490	50S_ribosomal_protein_L16	8367.41	-1.24239	0.0648608	-19.1548	8.82956e-82	4.68664e-80
RS00495	50S_ribosomal_protein_L29	4160.15	-1.30294	0.0666763	-19.5414	4.88675e-85	3.08018e-83
RS00500	30S_ribosomal_protein_S17	7300.1	-1.34752	0.0724251	-18.6057	2.89105e-77	1.26766e-75
RS00505	50S_ribosomal_protein_L14	6094.8	-1.27316	0.065993	-19.2923	6.23124e-83	3.59098e-81
RS00510	50S_ribosomal_protein_L24	7010.6	-1.35672	0.0700295	-19.3735	1.29057e-83	7.88814e-82
RS00515	50S_ribosomal_protein_L5	12099.4	-1.28029	0.0637582	-20.0804	1.09399e-89	9.1941e-88
RS00520	30S_ribosomal_protein_S14_type_Z	3737.57	-1.24303	0.0891579	-13.9419	3.5241e-44	7.40427e-43
RS00525	30S_ribosomal_protein_S8	8160.43	-1.39943	0.0634672	-22.0496	9.63025e-108	1.61869e-105
RS00530	50S_ribosomal_protein_L6	11141.9	-1.35598	0.0633676	-21.3986	1.37786e-101	1.9851e-99
RS00535	50S_ribosomal_protein_L18	5046.89	-1.35042	0.0723034	-18.6771	7.60921e-78	3.48813e-76
RS00540	30S_ribosomal_protein_S5	7525.74	-1.28039	0.0667715	-19.1757	5.90594e-82	3.21954e-80
RS00545	50S_ribosomal_protein_L30	3557.06	-1.37181	0.0694877	-19.7418	9.43058e-87	6.79339e-85
RS00550	50S_ribosomal_protein_L15	7324.68	-1.37444	0.0656355	-20.9405	2.28914e-97	3.07813e-95
RS00555	preprotein_translocase_subunit_SecY	33056.3	-1.25484	0.0955511	-13.1326	2.141e-39	3.72275e-38
RS00560	adenylate_kinase	1827.69	-1.48544	0.0752408	-19.7425	9.30167e-87	6.79339e-85
RS00565	translation_initiation_factor_IF-1	8635.35	-1.13637	0.091369	-12.4371	1.64324e-35	2.53008e-34
RS00570	50S_ribosomal_protein_L36	4159.1	-1.14114	0.0831842	-13.7183	7.89385e-43	1.54582e-41
RS00575	30S_ribosomal_protein_S13	9023.56	-1.27042	0.0676256	-18.7861	9.82128e-79	4.71655e-77
RS00580	30S_ribosomal_protein_S11	11308.1	-1.24076	0.0602663	-20.588	3.51739e-94	3.94143e-92
RS00585	DNA-directed_RNA_polymerase_subunit_alpha	16100.8	-1.32678	0.0634791	-20.9011	5.23166e-97	6.59517e-95
RS00590	50S_ribosomal_protein_L17	13402.4	-1.31201	0.0847373	-15.4833	4.49687e-54	1.2257e-52
RS00680	hypothetical_protein	19.7743	0.409266	0.347583	1.17746	0.239012	0.32011
RS00685	hypothetical_protein	61.6817	0.525933	0.229669	2.28997	0.0220233	0.0383269
RS00690	hypothetical_protein	66.5461	0.673963	0.217998	3.0916	0.00199083	0.00415684
RS00695	hypothetical_protein	75.3334	1.27724	0.242036	5.27707	1.31268e-07	4.57283e-07
RS00700	hypothetical_protein	2372	0.631031	0.140195	4.5011	6.76019e-06	1.97042e-05
RS00705	hypothetical_protein	5.87062	0.178178	0.538227	0.331046	0.74061	0.79848
RS00710	histidine_phosphatase_family_protein	396.067	0.994677	0.107773	9.22934	2.72297e-20	2.12877e-19
RS00715	D-alanyl-D-alanine_carboxypeptidase	785.088	0.808271	0.0939191	8.60604	7.56257e-18	5.20604e-17
RS00720	N-acetylmuramoyl-L-alanine_amidase	820.553	0.58089	0.11653	4.98488	6.20012e-07	2.03675e-06
RS00725	heat-inducible_transcriptional_repressor_HrcA	1668.03	0.465827	0.116352	4.00361	6.23823e-05	0.000163197
RS00730	nucleotide_exchange_factor_GrpE	1694.38	0.445808	0.108378	4.11344	3.89804e-05	0.000103999
RS00735	molecular_chaperone_DnaK	9925.51	1.06603	0.0892208	11.9483	6.62883e-33	9.3499e-32
RS00740	chaperone_DnaJ	2737.97	1.13528	0.0858235	13.2281	6.04096e-40	1.07828e-38
RS00745	GntR_family_transcriptional_regulator	156.929	0.616893	0.170855	3.61063	0.000305455	0.000729116
RS00750	tRNA_pseudouridine(38-40)_synthase_TruA	415.137	-0.107684	0.111446	-0.966242	0.333923	0.428995
RS00755	hydroxymethylpyrimidine/phosphomethylpyrimidine_kinase	371.107	0.0624558	0.104296	0.598833	0.549284	0.634903
RS00760	membrane_protein	128.795	0.0895361	0.169263	0.528976	0.596822	0.67781
RS00765	TIGR01440_family_protein	312.446	-0.117841	0.141006	-0.835715	0.403315	0.502773
RS00770	mechanosensitive_ion_channel_protein	560.989	0.702128	0.112215	6.25698	3.92499e-10	1.688e-09
RS00775	trigger_factor	12839.8	-0.309248	0.134944	-2.29167	0.0219248	0.0382216
RS00780	DNA-directed_RNA_polymerase_subunit_delta	2212.14	-0.277532	0.0798177	-3.47707	0.000506923	0.00117525
RS00785	CTP_synthetase	11611.1	1.36313	0.0800869	17.0206	5.77886e-65	1.94266e-63
RS00790	alpha/beta_hydrolase	1067.34	-0.174029	0.0824331	-2.11115	0.0347591	0.0576081
RS00800	deoxyuridine_5'-triphosphate_nucleotidohydrolase	529.227	0.334992	0.218691	1.53181	0.12557	0.184066
RS00805	DNA_repair_protein_RadA	1239.82	0.472226	0.104462	4.52055	6.16786e-06	1.80298e-05
RS00810	carbonate_dehydratase	2773.86	0.02506	0.142509	0.175848	0.860413	0.895949
RS00815	pyridine_nucleotide-disulfide_oxidoreductase	4604.14	2.97456	0.0885618	33.5874	2.56006e-247	5.16363e-244
RS00820	transposase	13.1144	0.0522825	0.39153	0.133534	0.893771	0.924017
RS00825	glutamate--tRNA_ligase	2898.41	-0.303192	0.111384	-2.72204	0.00648794	0.0125587
RS00830	D-ribose_ABC_transporter_substrate-binding_protein	30.7658	-0.700617	0.341153	-2.05368	0.0400071	0.0654986
RS00835	ribose_ABC_transporter_permease	25.5617	-0.341637	0.308732	-1.10658	0.268475	0.354859
RS00840	ribose_import_ATP-binding_protein_RbsA	27.9262	-0.915526	0.310641	-2.94722	0.00320649	0.00648695
RS00845	D-ribose_pyranase	11.9059	-0.689488	0.471432	-1.46254	0.143594	0.206162
RS00850	ribokinase	94.4277	-1.62454	0.393239	-4.13117	3.60926e-05	9.69357e-05
RS00855	LacI_family_transcriptional_regulator	292.938	-1.2725	0.210897	-6.03376	1.60187e-09	6.51406e-09
RS00860	ABC_transporter_permease	9.96811	-0.371757	0.480924	-0.773007	0.439518	0.536627
RS00865	ABC_transporter_ATP-binding_protein	12.8511	0.188361	0.403262	0.467093	0.640433	0.718439
RS00870	DNA-binding_response_regulator	262.267	1.08169	0.129397	8.35947	6.30021e-17	4.03414e-16
RS00875	sensor_histidine_kinase	536.377	0.201243	0.127829	1.57431	0.115416	0.171046
RS00880	argininosuccinate_synthase	8.78095	0.786525	0.45527	1.7276	0.0840594	0.129327
RS00885	argininosuccinate_lyase	20.6081	1.08365	0.363664	2.9798	0.00288435	0.00587649
RS00890	fructose-bisphosphate_aldolase	28424.2	0.27597	0.157273	1.75471	0.0793082	0.122578
RS00895	L-lactate_dehydrogenase	2312.72	3.38063	0.106473	31.7511	3.06274e-221	2.05918e-218
RS00900	50S_ribosomal_protein_L28	25858.1	-0.465851	0.109664	-4.24799	2.15694e-05	5.92718e-05
RS00905	Asp23/Gls24_family_envelope_stress_response_protein	1483.28	0.577454	0.0778536	7.41718	1.1964e-13	6.522e-13
RS00910	dihydroxyacetone_kinase	10662.2	0.228617	0.0731993	3.12322	0.00178884	0.00377021
RS00915	protease	1148.99	-0.0118572	0.122658	-0.096669	0.922989	0.946062
RS00920	hypothetical_protein	1524.49	-1.25288	0.132574	-9.45037	3.37623e-21	2.83744e-20
RS00925	hypothetical_protein	112.006	0.131172	0.200597	0.653906	0.513172	0.604596
RS00930	peptide_ABC_transporter_ATP-binding_protein	2493.9	-0.557907	0.119462	-4.67016	3.00969e-06	9.07407e-06
RS00935	glutamine_ABC_transporter_substrate-binding_protein	2834.52	-0.428884	0.0915126	-4.68661	2.77772e-06	8.4124e-06
RS00940	hypothetical_protein	957.675	0.461027	0.0865804	5.32485	1.01039e-07	3.56286e-07
RS00945	undecaprenyl-diphosphatase	2019.68	-0.069216	0.0838655	-0.825321	0.409189	0.508211
RS00950	adaptor_protein_MecA	962.963	0.412453	0.0895612	4.60526	4.11946e-06	1.22011e-05
RS00955	undecaprenyl-phosphate_alpha-N-acetylglucosaminyl_1-phosphate_transferase	3096.48	0.310521	0.071694	4.3312	1.48296e-05	4.18339e-05
RS00960	ABC_transporter_ATP-binding_protein	1323.15	0.127144	0.132295	0.961067	0.336519	0.43178
RS00965	Fe-S_cluster_assembly_protein_SufD	2769.13	0.0132102	0.127726	0.103427	0.917624	0.941908
RS00970	cysteine_desulfurase	2291.27	0.0123522	0.15962	0.0773846	0.938318	0.957796
RS00975	iron-sulfur_cluster_assembly_scaffold_protein	931.766	-0.0138605	0.184571	-0.0750959	0.940138	0.95916
RS00980	Fe-S_cluster_assembly_protein_SufB	2707.52	0.0388271	0.184347	0.21062	0.833184	0.872228
RS00985	D-alanyl-D-alanine_carboxypeptidase	182.237	-0.132238	0.184345	-0.717339	0.473165	0.567404
RS00990	D-alanyl-D-alanine_carboxypeptidase	840.385	-0.224384	0.100427	-2.2343	0.0254636	0.0437106
RS00995	ABC_transporter_substrate-binding_protein	3796.66	-1.01408	0.0871486	-11.6362	2.69617e-31	3.55436e-30
RS01000	peptide_ABC_transporter_permease	1029.83	-0.81207	0.101977	-7.96324	1.67591e-15	1.01817e-14
RS01005	peptide_ABC_transporter_permease	1040.05	-0.846418	0.0953428	-8.87763	6.82982e-19	4.99121e-18
RS01010	ABC_transporter_ATP-binding_protein	1223.22	-0.999302	0.0827142	-12.0814	1.32477e-33	1.92235e-32
RS01015	ABC_transporter_ATP-binding_protein	1877.79	-1.08549	0.0808666	-13.4232	4.41901e-41	8.33003e-40
RS01045	4-(cytidine_5'-diphospho)-2-C-methyl-D-erythritol_kinase	986.202	1.40564	0.122494	11.4751	1.75948e-30	2.24612e-29
RS01050	transcriptional_regulator	539.782	0.880074	0.114354	7.69603	1.4036e-14	8.11192e-14
RS01055	zinc_ABC_transporter_ATP-binding_protein	808.736	0.806554	0.112924	7.14246	9.16757e-13	4.77803e-12
RS01060	zinc_ABC_transporter_permease	1629.33	0.632918	0.0922861	6.85821	6.97281e-12	3.45557e-11
RS01075	tyrosine--tRNA_ligase	2202.26	-0.272132	0.077449	-3.5137	0.000441911	0.00103523
RS01080	penicillin-binding_protein_1B	3888.37	-0.0604334	0.0870787	-0.694009	0.487677	0.579979
RS01085	DNA-directed_RNA_polymerase_subunit_beta	10201.2	-1.46446	0.089317	-16.3962	2.03494e-60	6.21891e-59
RS01090	DNA-directed_RNA_polymerase_subunit_beta'	13068.6	-1.62063	0.0686059	-23.6223	2.27561e-123	4.17264e-121
RS01095	dipicolinate_synthase	1591.97	-0.407351	0.177194	-2.2989	0.0215108	0.0375648
RS01105	competence_protein_CglB	9.59931	0.290122	0.452988	0.640462	0.521872	0.61244
RS01110	competence_protein_ComGF	13.4387	0.293354	0.425197	0.689925	0.490241	0.581657
RS01115	hypothetical_protein	16.8427	0.673464	0.391849	1.71868	0.0856721	0.131407
RS01120	adenine_methyltransferase	961.141	-0.239172	0.127569	-1.87485	0.0608128	0.096128
RS01125	acetate_kinase	5452.83	-0.442921	0.060353	-7.33883	2.15469e-13	1.15585e-12
RS01130	transcriptional_regulator	92.2185	-0.0598089	0.198487	-0.301324	0.763167	0.816176
RS01135	hypothetical_protein	183.619	-0.062641	0.144843	-0.432476	0.665395	0.739858
RS01140	CPBP_family_intramembrane_metalloprotease	536.326	0.347842	0.117588	2.95813	0.00309507	0.00628677
RS01145	pyrroline-5-carboxylate_reductase	1169.48	1.05686	0.124619	8.4808	2.23652e-17	1.4839e-16
RS01150	glutamyl_aminopeptidase	1490.29	1.16856	0.0902895	12.9423	2.59639e-38	4.40078e-37
RS01155	hypothetical_protein	140.264	0.876155	0.159065	5.50816	3.62612e-08	1.32738e-07
RS01160	hypothetical_protein	284.43	0.423143	0.124716	3.39285	0.000691685	0.00156756
RS01165	thiol_reductase_thioredoxin	651.84	0.24721	0.108963	2.26875	0.0232834	0.0403459
RS01170	tRNA-binding_protein	1288.88	0.100552	0.0969725	1.03691	0.299778	0.39035
RS01175	S-adenosylmethionine-dependent_methyltransferase	466.915	1.34345	0.128126	10.4854	1.00802e-25	1.06449e-24
RS01180	Single-stranded_DNA-binding_protein_2	39.7477	1.05563	0.258001	4.09158	4.28436e-05	0.000113855
RS01185	haloacid_dehalogenase	466.776	0.826618	0.102141	8.09292	5.82508e-16	3.58207e-15
RS01190	sensor_histidine_kinase	537.678	0.613921	0.103577	5.92717	3.08205e-09	1.23343e-08
RS01195	DNA-binding_response_regulator	301.698	0.791707	0.13066	6.05928	1.36728e-09	5.6053e-09
RS01200	murein_hydrolase_transporter_LrgA	11.4371	0.765535	0.483089	1.58467	0.113042	0.168022
RS01205	antiholin	17.9148	-0.136019	0.352544	-0.38582	0.69963	0.766885
RS01210	hypothetical_protein	307.226	0.199557	0.115773	1.72369	0.0847638	0.130212
RS01215	ABC_transporter_permease	68.6419	0.280286	0.21947	1.2771	0.201567	0.276948
RS01220	peptide_ABC_transporter_permease	74.7873	0.382488	0.222944	1.71562	0.0862311	0.132064
RS01225	ATPase	60.6115	0.106978	0.250023	0.427875	0.668742	0.742761
RS01230	nickel_ABC_transporter_ATP-binding_protein	83.7169	0.0814799	0.186355	0.437229	0.661945	0.736834
RS01235	PTS_beta-glucoside_transporter_subunit_EIIBCA	555.684	-0.186796	0.204909	-0.911605	0.361977	0.459765
RS01240	alpha2Calpha-phosphotrehalase	293.395	0.905239	0.233231	3.88129	0.000103903	0.000265617
RS01245	transcription_antiterminator_BglG	218.474	-1.45975	0.136037	-10.7306	7.31458e-27	8.06202e-26
RS01250	PTS_lactose_transporter_subunit_IIB	8.93557	0.388183	0.457095	0.84924	0.395748	0.494562
RS01255	PTS_ascorbate_transporter_subunit_IIC	69.2198	0.513305	0.210894	2.43394	0.0149353	0.0272867
RS01260	carbohydrate_degradation_protein	69.6569	0.224978	0.209469	1.07404	0.282805	0.370642
RS01265	transketolase	93.5021	-0.0612881	0.187521	-0.326833	0.743794	0.799464
RS01270	oxidoreductase	557.473	-0.0135854	0.117783	-0.115342	0.908174	0.936497
RS01275	30S_ribosomal_protein_S15	9920.92	-0.459552	0.147284	-3.12016	0.00180751	0.00379994
RS01280	polyribonucleotide_nucleotidyltransferase	2546.08	0.0350438	0.0673452	0.52036	0.602812	0.683843
RS01285	hypothetical_protein	913.745	0.0170919	0.0844494	0.202392	0.83961	0.87655
RS01290	serine_acetyltransferase	855.5	-0.0201722	0.0897405	-0.224784	0.822148	0.863234
RS01295	hypothetical_protein	311.168	-0.188435	0.123855	-1.52141	0.128156	0.187041
RS01300	cysteine--tRNA_ligase	2037.23	0.0104002	0.0726965	0.143064	0.88624	0.919993
RS01305	hypothetical_protein	846.486	0.0185574	0.143943	0.128922	0.897419	0.926828
RS01310	23S_rRNA_(guanosine(2251)-2'-O)-methyltransferase_RlmB	651.092	0.440716	0.11821	3.72826	0.00019281	0.000474265
RS01315	hypothetical_protein	409.137	0.073848	0.129551	0.570031	0.568657	0.652435
RS01320	fatty_acid-binding_protein_DegV	2695.87	-0.75441	0.106526	-7.0819	1.42187e-12	7.24222e-12
RS01325	transcriptional_regulator	31.4655	-0.615962	0.299384	-2.05743	0.0396447	0.0649581
RS01330	50S_ribosomal_protein_L13	11333.9	-0.688149	0.0738031	-9.32412	1.11907e-20	9.02865e-20
RS01335	30S_ribosomal_protein_S9	9244.48	-0.561295	0.078802	-7.12285	1.05716e-12	5.45342e-12
RS01340	site-specific_integrase	808.221	0.0686147	0.0974872	0.703833	0.481537	0.57437
RS01345	transcriptional_regulator	364.667	-0.156079	0.120939	-1.29055	0.196858	0.271961
RS01350	hypothetical_protein	8.68332	-0.784255	0.465927	-1.68322	0.0923333	0.140349
RS01355	hypothetical_protein	19.6846	-1.21372	0.373771	-3.24722	0.00116538	0.00255219
RS01360	hypothetical_protein	6.9429	-0.164431	0.520274	-0.316048	0.751966	0.805479
RS01365	hypothetical_protein	8.64311	-0.460544	0.468016	-0.984036	0.325098	0.419421
RS01370	hypothetical_protein	16.5332	-0.512958	0.410841	-1.24855	0.211828	0.288964
RS01375	hypothetical_protein	168.343	0.53045	0.181038	2.93004	0.00338918	0.00683519
RS01380	restriction_endonuclease	1780.52	-0.058543	0.14753	-0.396822	0.691499	0.761744
RS01385	hypothetical_protein	2514.78	-0.528809	0.14088	-3.75362	0.000174297	0.000433485
RS01390	ATP-dependent_DNA_helicase_RecG	1048.93	-0.720006	0.106366	-6.76915	1.2954e-11	6.25078e-11
RS01395	hypothetical_protein	2.49964	-0.311204	0.577372	-0.539001	0.589886	0.671066
RS01400	hypothetical_protein	7.01464	0.433809	0.501846	0.864428	0.387353	0.486461
RS01405	MutR_family_transcriptional_regulator	105.915	0.409733	0.181821	2.25349	0.0242282	0.0418752
RS01410	MFS_transporter	90.9509	0.490715	0.182224	2.69292	0.00708289	0.013593
RS01415	amino_acid_ABC_transporter_permease	3015.71	1.47801	0.0856868	17.2489	1.13956e-66	4.10445e-65
RS01420	osmoprotectant_ABC_transporter_substrate-binding_protein	2673.63	1.29608	0.0744671	17.4047	7.6017e-68	2.78775e-66
RS01425	choline_ABC_transporter_permease	1339.97	1.22094	0.0834283	14.6346	1.68842e-48	3.82646e-47
RS01430	glycine/betaine_ABC_transporter_ATP-binding_protein	3099.68	1.2208	0.109996	11.0986	1.27485e-28	1.51257e-27
RS01515	hypothetical_protein	156.314	0.060577	0.16824	0.360063	0.7188	0.783263
RS01520	hypothetical_protein	695.853	-0.176586	0.137888	-1.28065	0.200318	0.27542
RS01525	hypothetical_protein	146.566	-0.207071	0.185299	-1.1175	0.263783	0.34915
RS01530	hypothetical_protein	185.586	-0.194819	0.145539	-1.33861	0.180699	0.252578
RS01535	acetyltransferase	581.806	1.00032	0.153465	6.51823	7.11401e-11	3.19576e-10
RS01540	GNAT_family_N-acetyltransferase	527.878	0.847768	0.146935	5.76969	7.94159e-09	3.0983e-08
RS01545	acetyltransferase	810.123	0.900775	0.135261	6.65954	2.74683e-11	1.28547e-10
RS01550	hypothetical_protein	357.974	-0.0450178	0.132843	-0.338879	0.734701	0.794246
RS01555	DNA-directed_RNA_polymerase_sigma-70_factor	139.66	0.109821	0.178851	0.614036	0.539191	0.627191
RS01560	lipoprotein	10.6314	0.16531	0.527903	0.313144	0.754172	0.807412
RS01565	TetR_family_transcriptional_regulator	103.524	0.292532	0.206419	1.41718	0.156431	0.222354
RS01570	antibiotic_ABC_transporter_permease	98.2012	0.248747	0.180711	1.37649	0.16867	0.237907
RS01575	glycosyl_transferase_family_2	46.7184	0.884744	0.24087	3.67312	0.000239605	0.000579476
RS01580	hypothetical_protein	208.181	-0.0251137	0.139565	-0.179942	0.857198	0.893524
RS01585	PadR_family_transcriptional_regulator	45.5665	0.199662	0.247288	0.807405	0.419433	0.518063
RS01590	hypothetical_protein	1521.01	-0.870298	0.0937302	-9.28514	1.61494e-20	1.27739e-19
RS01595	N-acetylglucosamine-6-phosphate_deacetylase	1285.17	-0.615901	0.106991	-5.75658	8.58363e-09	3.32946e-08
RS01600	isoprenylcysteine_carboxyl_methyltransferase	15.4963	-0.417791	0.395398	-1.05664	0.290678	0.379973
RS01605	glycine--tRNA_ligase_subunit_alpha	1914.33	-0.640799	0.127387	-5.03034	4.89609e-07	1.62158e-06
RS01610	FMN-dependent_NADH-azoreductase	976.584	-0.709185	0.103707	-6.83834	8.0114e-12	3.94122e-11
RS01615	glycine--tRNA_ligase_subunit_beta	3851.85	-0.589177	0.088423	-6.66317	2.6799e-11	1.25706e-10
RS01620	hypothetical_protein	949.345	-0.34379	0.14414	-2.38511	0.0170741	0.0306665
RS01625	membrane_protein	39.3958	0.159086	0.255298	0.62314	0.533192	0.622607
RS01630	glycerol_kinase	193.016	0.108231	0.189655	0.570673	0.568222	0.652307
RS01635	alpha-glycerophosphate_oxidase	160.293	0.0266549	0.153558	0.173581	0.862194	0.897341
RS01640	glycerol_transporter	107.176	-0.00170372	0.191281	-0.00890689	0.992893	0.995041
RS01645	NADH_peroxidase	204.455	-0.992764	0.146555	-6.77401	1.25258e-11	6.05866e-11
RS01650	hypothetical_protein	255.606	-1.0516	0.162009	-6.49103	8.5253e-11	3.80432e-10
RS01655	transketolase	4737.28	-0.170221	0.17794	-0.956622	0.338758	0.434101
RS01660	bacteriocin_immunity_protein	474.327	-0.0475566	0.16513	-0.287994	0.773351	0.824445
RS01665	3-dehydroquinate_dehydratase	1308.63	-0.0894768	0.138732	-0.644959	0.518953	0.610338
RS01670	ABC_transporter_permease	3668.03	-0.149381	0.157952	-0.945736	0.344283	0.440063
RS01675	PTS_cellobiose_transporter_subunit_IIC	2148.56	-0.201771	0.216554	-0.931736	0.351473	0.447834
RS01680	glutamate_5-kinase	1306.9	0.482823	0.0851293	5.67164	1.41434e-08	5.36225e-08
RS01685	gamma-glutamyl-phosphate_reductase	3206.14	0.280664	0.0854659	3.28394	0.00102368	0.00227398
RS01690	16S_rRNA_(cytosine(1402)-N(4))-methyltransferase	1178.79	0.108967	0.0859742	1.26743	0.205	0.28052
RS01695	cell_division_protein_FtsL	399.079	-0.259766	0.110112	-2.3591	0.0183193	0.032571
RS01700	penicillin-binding_protein_2X	2283.69	-0.367548	0.075959	-4.83877	1.30648e-06	4.11103e-06
RS01705	phospho-N-acetylmuramoyl-pentapeptide-transferase	1135.74	-0.525207	0.0824327	-6.37135	1.87371e-10	8.21583e-10
RS01710	DEAD/DEAH_box_helicase	2128.16	-0.288403	0.0914353	-3.15418	0.00160951	0.00342807
RS01715	amino_acid_ABC_transporter_substrate-binding_protein	1600.33	0.271002	0.111648	2.4273	0.0152118	0.0276916
RS01720	amino_acid_ABC_transporter_permease	1979.16	0.0729684	0.071207	1.02474	0.305488	0.397016
RS01725	amino_acid_ABC_transporter_ATP-binding_protein	2515.63	-0.0498975	0.0903971	-0.551981	0.580961	0.663533
RS01730	membrane_protein	207.628	0.16523	0.151348	1.09172	0.274956	0.362238
RS01735	thioredoxin-disulfide_reductase	3012.81	0.171814	0.110735	1.55159	0.120761	0.178313
RS01740	nicotinate_phosphoribosyltransferase	1689.8	-0.217294	0.0918612	-2.36546	0.0180077	0.0320862
RS01745	NAD(+)_synthetase	1659.01	-0.275705	0.102972	-2.67748	0.00741788	0.0141684
RS01750	aminopeptidase_C	1386.15	0.0514894	0.0952194	0.540745	0.588683	0.670454
RS01755	penicillin-binding_protein_1A	6125.67	-0.0234911	0.0678484	-0.346229	0.729171	0.79157
RS01760	Holliday_junction_resolvase_RecU	1232.8	0.0655976	0.104513	0.627648	0.530235	0.62035
RS01765	hypothetical_protein	55.874	-0.421952	0.228926	-1.84318	0.065303	0.102743
RS01770	cell_cycle_protein_GpsB	1994.46	0.242613	0.0889119	2.72869	0.00635857	0.012332
RS01775	RNA_methyltransferase	1033.93	-0.67234	0.0879774	-7.64219	2.13563e-14	1.22374e-13
RS01780	hypothetical_protein	3779.23	-0.2987	0.0631048	-4.7334	2.20792e-06	6.76647e-06
RS01785	S-ribosylhomocysteine_lyase	2048.9	0.345869	0.0911292	3.79537	0.000147425	0.000370308
RS01790	ribonuclease_Y	3306.74	-0.772476	0.0796099	-9.70326	2.92003e-22	2.60606e-21
RS01795	multidrug_ABC_transporter_ATP-binding_protein	99.1899	1.22358	0.205787	5.94585	2.75031e-09	1.10506e-08
RS01800	ABC_transporter_permease	108.542	1.29619	0.178401	7.26562	3.71339e-13	1.97623e-12
RS01805	sensor_histidine_kinase	567.077	1.40234	0.105117	13.3407	1.34249e-40	2.46164e-39
RS01810	DNA-binding_response_regulator	382.988	0.974303	0.112516	8.65925	4.74893e-18	3.3259e-17
RS01815	DUF1211_domain-containing_membrane_protein	600.366	1.09409	0.0966751	11.3172	1.07837e-29	1.3344e-28
RS01820	guanylate_kinase	767.551	-0.853011	0.0995167	-8.57154	1.02113e-17	6.95816e-17
RS01825	DNA-directed_RNA_polymerase_subunit_omega	1480.12	-1.11671	0.115352	-9.68091	3.63464e-22	3.18742e-21
RS01830	primosomal_protein_N'	701.851	-0.1983	0.102188	-1.94053	0.0523148	0.0838783
RS01835	methionyl-tRNA_formyltransferase	904.008	0.234441	0.105538	2.22139	0.0263247	0.0450356
RS01840	16S_rRNA_(cytosine(967)-C(5))-methyltransferase	1489.23	0.155308	0.120013	1.29409	0.195633	0.270454
RS01845	protein_phosphatase	1545.42	0.171199	0.0769419	2.22504	0.0260784	0.0446899
RS01850	serine/threonine_protein_kinase	8109.52	0.0499213	0.067977	0.734385	0.462714	0.558524
RS01855	transporter	199.277	0.163588	0.188614	0.867319	0.385767	0.485125
RS01860	two-component_sensor_histidine_kinase	411.371	-0.19299	0.118153	-1.63339	0.102387	0.154158
RS01865	DNA-binding_response_regulator	235.361	-0.150926	0.131717	-1.14583	0.251865	0.335321
RS01870	peptidyl-prolyl_cis-trans_isomerase	2410.76	-0.285634	0.0830259	-3.4403	0.000581074	0.00133488
RS01875	hypothetical_protein	1874.45	-0.217652	0.157354	-1.38319	0.166605	0.235324
RS01880	pyruvate_formate_lyase-activating_protein	61.5078	0.328294	0.254794	1.28847	0.197583	0.27214
RS01885	DeoR_family_transcriptional_regulator	538.902	-0.0686066	0.133339	-0.514528	0.606883	0.687687
RS01890	DNA-binding_transcriptional_regulator	505.011	0.0440827	0.121367	0.363217	0.716443	0.781116
RS01895	PTS_cellobiose_transporter_subunit_IIA	4.59759	-0.154024	0.556718	-0.276665	0.782037	0.831069
RS01900	PTS_sugar_transporter_subunit_IIB	5.62882	0.0721952	0.507605	0.142227	0.886901	0.920205
RS01905	PTS_cellobiose_transporter_subunit_IIC	52.0219	0.42827	0.236176	1.81335	0.0697772	0.109017
RS01910	formate_C-acetyltransferase/glycerol_dehydratase_family_glycyl_radical_enzyme	121.996	0.302403	0.215376	1.40407	0.160298	0.227531
RS01915	fructose-bisphosphate_aldolase	47.5297	0.181181	0.239146	0.757618	0.44868	0.545502
RS01920	glycerol_dehydrogenase	107.211	0.483539	0.210749	2.29439	0.0217682	0.0379814
RS01925	cysteine_synthase_A	1599.61	-0.225391	0.125309	-1.79869	0.0720684	0.111989
RS01930	YigZ_family_protein	207.421	0.728411	0.140068	5.20042	1.98837e-07	6.80906e-07
RS01935	competence_protein	9.23033	-0.628709	0.49688	-1.26531	0.205759	0.280986
RS01945	ribosomal_subunit_interface_protein	5786.74	0.106478	0.0912859	1.16643	0.243442	0.324965
RS01975	aspartate_kinase	420.12	0.202681	0.152993	1.32477	0.185247	0.257862
RS01980	haloacid_dehalogenase	484.932	-0.600248	0.140244	-4.28001	1.86882e-05	5.18487e-05
RS01985	enoyl-CoA_hydratase	7090.33	-0.720702	0.0702498	-10.2591	1.07675e-24	1.06986e-23
RS01990	transcriptional_regulator	4552.77	-0.624569	0.117779	-5.30288	1.1399e-07	3.98167e-07
RS01995	ketoacyl-ACP_synthase_III	12388.6	-0.752311	0.104294	-7.21334	5.45943e-13	2.88264e-12
RS02000	acyl_carrier_protein	9468.57	-0.84533	0.0716871	-11.7919	4.29484e-32	5.85317e-31
RS02005	2-nitropropane_dioxygenase	6249.4	-0.836058	0.101827	-8.21053	2.20211e-16	1.38801e-15
RS02010	malonyl_CoA-acyl_carrier_protein_transacylase	7145.5	-1.06467	0.116095	-9.17065	4.70155e-20	3.59206e-19
RS02015	beta-ketoacyl-ACP_reductase	5667.6	-1.08682	0.111171	-9.77606	1.42661e-22	1.29035e-21
RS02020	beta-ketoacyl-[acyl-carrier-protein]_synthase_II	9527.16	-1.0651	0.107315	-9.92499	3.24139e-23	3.01285e-22
RS02025	acetyl-CoA_carboxylase_biotin_carboxyl_carrier_protein_subunit	3639.54	-1.25801	0.118229	-10.6404	1.93213e-26	2.07293e-25
RS02030	beta-hydroxyacyl-ACP_dehydratase	3047.66	-1.36926	0.0989391	-13.8395	1.47319e-43	3.03207e-42
RS02035	acetyl-CoA_carboxylase_biotin_carboxylase_subunit	8605.84	-1.45138	0.0987045	-14.7042	6.05414e-49	1.40359e-47
RS02040	acetyl-CoA_carboxylase_carboxyl_transferase_subunit_beta	4297.83	-1.64065	0.111069	-14.7714	2.23852e-49	5.25011e-48
RS02045	acetyl-CoA_carboxylase_carboxyl_transferase_subunit_alpha	6618.72	-1.89992	0.112409	-16.9019	4.35995e-64	1.44164e-62
RS02050	hypothetical_protein	536.874	0.696762	0.137305	5.07455	3.88413e-07	1.29707e-06
RS02055	serine--tRNA_ligase	1704.88	-0.282713	0.14033	-2.01463	0.0439434	0.0711347
RS02060	membrane_protein	1858.61	-0.474722	0.134671	-3.52504	0.000423412	0.000994204
RS02065	PTS_mannose_transporter_accessory_protein_ManO	1394.68	-0.73333	0.108951	-6.7308	1.68734e-11	8.0268e-11
RS02070	PTS_mannose_transporter_subunit_IID	9584.52	-1.56565	0.156698	-9.9915	1.66054e-23	1.57245e-22
RS02075	PTS_mannose/fructose/sorbose_transporter_subunit_IIC	6025.04	-1.51489	0.166775	-9.0834	1.05232e-19	7.94952e-19
RS02080	PTS_mannose_transporter_subunit_EIIAB	5923.54	-1.70073	0.18243	-9.32263	1.13494e-20	9.12024e-20
RS02085	haloacid_dehalogenase	706.544	-0.262632	0.0894374	-2.93649	0.00331949	0.00670212
RS02090	hypothetical_protein	1116.4	0.0608149	0.0994801	0.611327	0.540983	0.628912
RS02095	membrane_protein	336.624	1.31439	0.146414	8.97724	2.77649e-19	2.08962e-18
RS02100	NCS2_family_permease	225.106	0.546823	0.143162	3.8196	0.000133668	0.000338278
RS02105	tRNA_(adenosine(37)-N6)-threonylcarbamoyltransferase_complex_ATPase_subunit_type_1_TsaE	288.639	0.321556	0.134805	2.38534	0.0170633	0.0306665
RS02110	N-acetyltransferase	583.779	0.0901564	0.111056	0.811809	0.416901	0.515567
RS02115	transporter	3263.18	-0.251978	0.107966	-2.33387	0.0196024	0.0344708
RS02120	hypothetical_protein	922.528	0.312248	0.12381	2.52199	0.0116693	0.0216385
RS02125	histidine_triad_protein	517.292	0.461084	0.123833	3.72342	0.000196539	0.000482848
RS02130	hypothetical_protein	123.113	-0.632585	0.194763	-3.24796	0.00116234	0.0025483
RS02135	multidrug_ABC_transporter_ATP-binding_protein	129.23	0.152313	0.155333	0.980563	0.326808	0.420927
RS02140	multidrug_ABC_transporter_permease	303.997	0.0755893	0.120868	0.625387	0.531717	0.621724
RS02145	aminoglycoside_phosphotransferase	871.668	-0.208457	0.0948135	-2.1986	0.0279063	0.0473796
RS02150	tRNA_(guanosine(46)-N7)-methyltransferase_TrmB	1063.77	-0.553565	0.126874	-4.3631	1.28235e-05	3.63272e-05
RS02160	ribosome_maturation_factor_RimP	663.418	-0.668303	0.117207	-5.70189	1.18484e-08	4.5434e-08
RS02165	transcription_termination/antitermination_protein_NusA	2074.46	-0.894013	0.0746701	-11.9728	4.93159e-33	7.00494e-32
RS02170	hypothetical_protein	675.214	-0.945489	0.0920767	-10.2685	9.77173e-25	9.80576e-24
RS02175	hypothetical_protein	693.801	-0.884471	0.0923005	-9.58251	9.47136e-22	8.23437e-21
RS02180	translation_initiation_factor_IF-2	6484.77	-0.927733	0.0717661	-12.9272	3.16174e-38	5.27044e-37
RS02185	ribosome-binding_factor_A	2024.06	-1.07662	0.102866	-10.4662	1.23462e-25	1.29699e-24
RS02190	esterase	29.3358	0.103996	0.308029	0.337617	0.735652	0.794756
RS02195	uracil_phosphoribosyltransferase	76.0375	0.00812779	0.204582	0.0397289	0.968309	0.977731
RS02200	copper-translocating_P-type_ATPase	541.119	-0.0633841	0.130187	-0.486871	0.62635	0.704993
RS02205	carbonate_dehydratase	124.036	-0.0144957	0.175489	-0.082602	0.934168	0.955001
RS02210	hypothetical_protein	392.533	1.38948	0.109377	12.7036	5.64749e-37	9.11279e-36
RS02215	haloacid_dehalogenase	904.32	1.28854	0.0965266	13.349	1.20009e-40	2.23991e-39
RS02220	DNA_polymerase_I	2370.88	0.0288001	0.0710321	0.405451	0.685146	0.756398
RS02225	CoA-binding_protein	633.585	-0.00549843	0.0994755	-0.0552742	0.95592	0.96939
RS02230	transcriptional_repressor	2047.6	-0.160731	0.0848017	-1.89538	0.0580423	0.0922549
RS02235	YSIRK_signal_domain/LPXTG_anchor_domain_surface_protein	15.5426	-0.731476	0.404088	-1.81019	0.0702665	0.109696
RS02240	DNA-binding_response_regulator	175.623	-0.338216	0.142107	-2.38001	0.0173124	0.0310667
RS02245	two-component_sensor_histidine_kinase	407.143	-0.485891	0.129641	-3.74797	0.000178272	0.000442826
RS02250	membrane_protein	1272.56	0.0457202	0.0971059	0.470829	0.637763	0.716241
RS02255	tRNA_guanosine(34)_transglycosylase_Tgt	1712.21	-0.6129	0.12448	-4.92367	8.49356e-07	2.74544e-06
RS02260	hypothetical_protein	640.739	-0.929979	0.107786	-8.62801	6.24299e-18	4.32719e-17
RS02265	BioY_family_transporter	1068.61	-0.859149	0.103908	-8.26834	1.35837e-16	8.58881e-16
RS02270	metal-dependent_hydrolase	1191.96	1.63228	0.0887093	18.4003	1.30613e-75	5.48848e-74
RS02275	tRNA-specific_adenosine_deaminase	843.266	1.48198	0.135125	10.9675	5.47822e-28	6.31404e-27
RS02285	glucose-6-phosphate_isomerase	12625.8	-0.733212	0.0925383	-7.92333	2.3123e-15	1.38807e-14
RS02290	5-formyltetrahydrofolate_cyclo-ligase	266.962	0.974349	0.171029	5.69699	1.21939e-08	4.65818e-08
RS02295	rhomboid_family_intramembrane_serine_protease	185.288	0.575317	0.146022	3.93994	8.15022e-05	0.000210217
RS02300	membrane_protein	877.256	-0.307259	0.198285	-1.54958	0.121243	0.178893
RS02305	UTP--glucose-1-phosphate_uridylyltransferase	2373.03	0.102797	0.0759501	1.35349	0.1759	0.246725
RS02310	glycerol-3-phosphate_dehydrogenase	1480.54	0.158486	0.0775198	2.04446	0.0409083	0.0667573
RS02315	ribonuclease_P_protein_component	374.314	0.103607	0.126762	0.817332	0.413738	0.51197
RS02320	protein_translocase_component_YidC	1090.24	-0.330664	0.0802427	-4.1208	3.77553e-05	0.000101132
RS02325	Jag_protein	2098.61	-0.524661	0.0771628	-6.7994	1.05056e-11	5.10596e-11
RS02385	hypothetical_protein	1734.3	-0.159109	0.0970409	-1.63961	0.101087	0.1525
RS02390	recombination_regulator_RecX	214.714	-0.069734	0.205847	-0.338766	0.734786	0.794246
RS02395	23S_rRNA_(uracil-5-)-methyltransferase_RumA	360.748	0.0983843	0.113868	0.864019	0.387577	0.486461
RS02400	hypothetical_protein	98.9759	0.187967	0.188868	0.995231	0.319624	0.412992
RS02405	GNAT_family_acetyltransferase	314.028	0.332195	0.159322	2.08506	0.0370642	0.0610771
RS02410	hypothetical_protein	92.6864	0.22694	0.218652	1.03791	0.299314	0.390249
RS02415	glycosyl_transferase_family_2	131.886	-0.774512	0.178285	-4.34423	1.39765e-05	3.94828e-05
RS02420	ribonucleoside-diphosphate_reductase	57.1381	-0.95914	0.285448	-3.36013	0.000779062	0.00175572
RS02425	class_Ib_ribonucleoside-diphosphate_reductase_assembly_flavoprotein_NrdI	27.7518	-0.929499	0.349959	-2.65602	0.00790678	0.0150453
RS02430	ribonucleoside-diphosphate_reductase_subunit_alpha	150.14	-0.761001	0.23466	-3.243	0.0011828	0.00258193
RS02435	cell_surface_protein	271.787	-1.13393	0.245747	-4.6142	3.94608e-06	1.17915e-05
RS02440	hypothetical_protein	37.7491	-0.551936	0.265829	-2.07628	0.0378676	0.0623502
RS02455	AraC_family_transcriptional_regulator	47.0682	0.170209	0.239021	0.712109	0.476397	0.570602
RS02460	hypothetical_protein	25.352	0.358256	0.319772	1.12035	0.262565	0.348188
RS02465	4-carboxymuconolactone_decarboxylase	32.5385	0.42251	0.331118	1.27601	0.201952	0.2771
RS02470	cupin	20.6074	0.609222	0.340084	1.79139	0.0732313	0.113709
RS02475	MerR_family_transcriptional_regulator	155.393	0.97334	0.192411	5.05864	4.22255e-07	1.40775e-06
RS02480	Zn-dependent_alcohol_dehydrogenase	236.293	1.31235	0.15582	8.42226	3.69303e-17	2.41063e-16
RS02485	22C5-diketo-D-gluconic_acid_reductase	125.441	0.585152	0.179697	3.25634	0.0011286	0.00248786
RS02490	cation_efflux_system_protein	987.569	1.04968	0.125661	8.35324	6.6415e-17	4.23921e-16
RS02495	TetR_family_transcriptional_regulator	89.1844	0.514096	0.191956	2.6782	0.0074019	0.0141513
RS02500	YSIRK-targeted_surface_antigen_transcriptional_regulator	381.901	1.14283	0.155347	7.35664	1.88603e-13	1.01444e-12
RS02505	YSIRK_signal_domain/LPXTG_anchor_domain_surface_protein	688.294	0.285836	0.101432	2.818	0.00483234	0.00954636
RS02510	DNA-damage-inducible_protein_J	76.3841	0.156343	0.21116	0.740401	0.459057	0.555106
RS02515	hypothetical_protein	104.211	-0.254321	0.18845	-1.34954	0.177164	0.248325
RS02520	lipoprotein	399.407	-0.0688776	0.117066	-0.588364	0.556288	0.641528
RS02525	hypothetical_protein	15.1975	0.0217485	0.378009	0.0575343	0.95412	0.968525
RS02540	SAM-dependent_methyltransferase	467.055	-1.00162	0.105358	-9.50678	1.96651e-21	1.6807e-20
RS02545	aldose_1-epimerase	140.927	0.160569	0.20303	0.790861	0.429025	0.528616
RS02550	hypothetical_protein	502.961	-0.55462	0.118588	-4.67688	2.91279e-06	8.79504e-06
RS02555	N-acetyltransferase	274.207	-0.650325	0.135072	-4.81465	1.4746e-06	4.61841e-06
RS02570	valine--tRNA_ligase	2929.29	-0.961822	0.107204	-8.97193	2.91376e-19	2.18478e-18
RS02575	hypothetical_protein	1025.51	1.31915	0.0971924	13.5726	5.82482e-42	1.11892e-40
RS02580	CRISPR-associated_endonuclease_Cas3''	393.528	-1.10178	0.109233	-10.0865	6.34092e-24	6.17857e-23
RS02585	oxidoreductase	1026.7	0.434451	0.102956	4.21976	2.44558e-05	6.68392e-05
RS02590	hypothetical_protein	1632.81	0.405618	0.111616	3.63406	0.000278998	0.00066913
RS02595	hypothetical_protein	164.07	0.521625	0.146618	3.55771	0.000374098	0.000884592
RS02600	asparagine_synthetase_A	604.404	-0.467424	0.16002	-2.92103	0.00348871	0.00701568
RS02605	bacteriocin_transport_accessory_protein	655.97	0.0873083	0.126452	0.690444	0.489915	0.581612
RS02610	rRNA_methyltransferase	278.718	0.74157	0.1305	5.68253	1.3272e-08	5.04134e-08
RS02615	hypothetical_protein	187.009	0.48436	0.146451	3.30732	0.000941942	0.00210166
RS02620	pantetheine-phosphate_adenylyltransferase	344.016	0.374313	0.15009	2.49392	0.0126339	0.0233144
RS02625	peptidase_S16	689.719	0.316722	0.0989373	3.20124	0.00136838	0.00293931
RS02630	phosphoesterase	244.526	0.927637	0.153684	6.03601	1.57967e-09	6.45609e-09
RS02635	transcriptional_regulator	630.805	0.141603	0.0934607	1.51511	0.129745	0.188813
RS02640	23S_rRNA_(adenine(2503)-C(2))-methyltransferase_RlmN	1259.53	0.191675	0.125395	1.52857	0.126372	0.184973
RS02645	teicoplanin_resistance_protein_VanZ	693.436	-0.107971	0.114905	-0.939651	0.347397	0.4432
RS02650	multidrug_ABC_transporter_permease/ATP-binding_protein	888.877	0.28145	0.117216	2.40113	0.0163447	0.0294904
RS02655	multidrug_ABC_transporter_ATP-binding_protein	926.854	0.378809	0.115886	3.26882	0.00107997	0.00239112
RS02660	glutamine_amidotransferase	430.606	0.493535	0.157184	3.13986	0.00169027	0.00358493
RS02665	biotin_transporter_BioY	29.883	-0.21082	0.328364	-0.642032	0.520853	0.612214
RS02670	biotin_synthase	33.3035	-0.617216	0.28941	-2.13267	0.0329519	0.0549744
RS02675	hypothetical_protein	11.8709	0.00342628	0.456905	0.00749888	0.994017	0.995497
RS02680	acetyl-CoA_acetyltransferase	21.9363	-0.192454	0.346279	-0.555777	0.578363	0.661314
RS02685	long-chain-fatty-acid--CoA_ligase	31.6384	0.0797149	0.306649	0.259955	0.794899	0.84031
RS02690	endonuclease_III	788.794	-0.0500054	0.127258	-0.392945	0.69436	0.763644
RS02695	prepilin_peptidase	6.31336	-0.959333	0.524827	-1.8279	0.0675641	0.106052
RS02700	hypothetical_protein	318.195	-0.0754071	0.130463	-0.577996	0.563267	0.648464
RS02705	glucokinase	1021.42	-0.228666	0.101996	-2.24192	0.0249665	0.0429877
RS02710	NADH_dehydrogenase	941.734	-0.456803	0.169043	-2.70229	0.00688627	0.0132534
RS02715	translational_GTPase_TypA	10932.1	-0.0132582	0.0651047	-0.203644	0.838631	0.875981
RS02720	membrane_protein	3232.47	-0.110728	0.104368	-1.06094	0.288719	0.377902
RS02725	UDP-N-acetylmuramoyl-L-alanine--D-glutamate_ligase	1031.66	0.406251	0.0848453	4.78814	1.68332e-06	5.23958e-06
RS02730	undecaprenyldiphospho-muramoylpentapeptide_beta-N-_acetylglucosaminyltransferase	1122.7	0.230059	0.0797033	2.88644	0.00389629	0.00778871
RS02735	cell_division_protein_FtsQ	2002.69	0.176905	0.0829144	2.13359	0.0328766	0.0548942
RS02740	cell_division_protein_FtsA	4789.89	-0.211571	0.0776488	-2.72472	0.00643559	0.0124693
RS02745	cell_division_protein_FtsZ	6651.13	-0.109916	0.0705086	-1.5589	0.119019	0.175998
RS02750	YggS_family_pyridoxal_phosphate_enzyme	4028.48	-0.184297	0.069812	-2.6399	0.00829311	0.0156647
RS02755	cell_division_protein_SepF	3236.29	-0.147165	0.0805366	-1.82731	0.0676533	0.106109
RS02760	membrane_protein	1246.67	-0.194844	0.0802582	-2.42771	0.0151944	0.0276849
RS02765	RNA-binding_protein	4611.37	0.0866591	0.0637752	1.35882	0.174203	0.244856
RS02770	cell_division_protein_DivIVA	4248.16	0.0690231	0.0760739	0.907317	0.364239	0.462057
RS02775	isoleucine--tRNA_ligase	7278.81	-0.0795274	0.0719884	-1.10472	0.269279	0.355688
RS02780	hypothetical_protein	3479.51	0.749952	0.0848309	8.84056	9.52409e-19	6.88534e-18
RS02785	NUDIX_hydrolase	81.7093	0.871686	0.237461	3.67086	0.000241738	0.000583936
RS02790	ATP-dependent_Clp_protease_ATP-binding_subunit	4096.33	0.287433	0.114573	2.50874	0.0121164	0.0224209
RS02795	hypothetical_protein	2255.57	-0.593698	0.17434	-3.4054	0.000660661	0.00150741
RS02800	glutamine_ABC_transporter_permease	98.9704	0.126782	0.179214	0.707433	0.479298	0.573395
RS02805	peptide_ABC_transporter_ATP-binding_protein	157.569	0.116466	0.15611	0.746048	0.455638	0.552297
RS02810	phosphoglucomutase	1434.33	0.122459	0.0964721	1.26937	0.204308	0.280143
RS02815	bifunctional_methylenetetrahydrofolate_dehydrogenase/methenyltetrahydrofolate_cyclohydrolase	660.464	0.71192	0.0996948	7.14099	9.26592e-13	4.81685e-12
RS02820	NAD(P)H-hydrate_dehydratase	1086.07	0.317553	0.0853223	3.7218	0.000197804	0.000485366
RS02825	exodeoxyribonuclease_VII_large_subunit	1204.47	0.392397	0.0838739	4.67842	2.89097e-06	8.74227e-06
RS02830	exodeoxyribonuclease_7_small_subunit	179.462	0.576889	0.138982	4.15083	3.31278e-05	8.90917e-05
RS02835	geranyltranstransferase	651.009	0.359256	0.0945272	3.80056	0.000144371	0.000363542
RS02840	TlyA_family_rRNA_(cytidine-2'-O)-methyltransferase	737.942	0.235282	0.101486	2.31836	0.0204295	0.0358005
RS02845	ArgR_family_transcriptional_regulator	572.378	0.234372	0.1012	2.31592	0.0205625	0.0360022
RS02850	DNA_repair_protein_RecN	1821.57	0.127301	0.0701164	1.81557	0.0694367	0.108629
RS02855	hypothetical_protein	1628.74	-0.03306	0.0782008	-0.422758	0.672472	0.744852
RS02860	lipase	686.333	-0.171597	0.0945274	-1.81532	0.069475	0.108629
RS02865	membrane_protein	411.092	-0.47256	0.113348	-4.1691	3.05805e-05	8.25714e-05
RS02870	transcriptional_regulator	19474.1	0.908715	0.1738	5.22852	1.70868e-07	5.88124e-07
RS02875	hypothetical_protein	777.434	2.71101	0.137968	19.6496	5.82789e-86	4.0534e-84
RS02880	dihydroorotate_oxidase	370.653	-2.4038	0.199952	-12.0219	2.72724e-33	3.9013e-32
RS02885	peptidoglycan_branched_peptide_synthesis_protein	3170.52	0.707087	0.077434	9.13148	6.75718e-20	5.14311e-19
RS02890	UDP-N-acetylmuramoylpentapeptide-lysine_N(6)-alanyltransferase	2080.95	0.564534	0.0919888	6.13699	8.41015e-10	3.49758e-09
RS02895	UDP-N-acetylmuramoylpentapeptide-lysine_N(6)-alanyltransferase	2344.09	0.6744	0.0884805	7.62202	2.49738e-14	1.41894e-13
RS02900	sugar-phosphatase	1541.43	0.516582	0.0881317	5.86147	4.58777e-09	1.82156e-08
RS02905	phosphohydrolase	691.047	0.672403	0.115772	5.808	6.32222e-09	2.48575e-08
RS02910	hypothetical_protein	258.434	0.478166	0.149903	3.18984	0.00142351	0.00305449
RS02915	calcium-translocating_P-type_ATPase2C_PMCA-type	5068.36	0.753741	0.118623	6.35409	2.09658e-10	9.15325e-10
RS02920	phosphoesterase	395.481	0.456134	0.139858	3.26141	0.0011086	0.00245165
RS02925	fructose-bisphosphatase_class_III	338.454	-0.257874	0.162815	-1.58385	0.113229	0.168176
RS02930	epoxyqueuosine_reductase	525.603	-0.231215	0.129905	-1.77987	0.0750971	0.116426
RS02935	peptide_chain_release_factor_2	1387.01	0.0892491	0.0763513	1.16893	0.242433	0.323833
RS02940	cell_division_ATP-binding_protein_FtsE	1029.51	-0.0236878	0.0993337	-0.238467	0.811519	0.85519
RS02945	ABC_transporter_permease	2381.71	-0.0997526	0.0840911	-1.18624	0.235526	0.316282
RS02955	IS3_family_transposase	273.946	0.177036	0.116176	1.52386	0.127542	0.18655
RS02960	thioesterase	1258.89	0.267516	0.081482	3.28313	0.00102662	0.00227799
RS02965	hypothetical_protein	875.374	0.452919	0.137176	3.30175	0.00096085	0.00214147
RS02970	acetoin_reductase	2590.95	1.40749	0.129611	10.8593	1.80094e-27	2.04073e-26
RS02975	bifunctional_DnaQ_family_exonuclease/ATP-dependent_helicase	732.404	-0.890149	0.0953904	-9.33164	1.04243e-20	8.44408e-20
RS02980	aspartate_aminotransferase	1532.01	-0.681729	0.0876274	-7.77987	7.26009e-15	4.25686e-14
RS02985	asparagine--tRNA_ligase	2702.9	-1.05232	0.0932245	-11.288	1.50406e-29	1.80576e-28
RS02990	membrane_protein	1543.75	-1.52405	0.102315	-14.8957	3.51243e-50	8.43401e-49
RS02995	hypothetical_protein	1974.77	-1.49488	0.12313	-12.1406	6.43515e-34	9.47423e-33
RS03000	hypothetical_protein	199.619	0.863274	0.191384	4.51069	6.46156e-06	1.8861e-05
RS03005	RNase_adaptor_protein_RapZ	559.837	0.751278	0.0993677	7.56059	4.01259e-14	2.26073e-13
RS03010	YvcK_family_protein	706.573	0.33433	0.0895392	3.7339	0.000188541	0.000464331
RS03015	sporulation_protein	771.785	0.192404	0.0906365	2.12281	0.0337696	0.0560141
RS03020	dipeptidase	1599.95	0.128934	0.0840745	1.53357	0.125134	0.183694
RS03025	zinc_ABC_transporter_substrate-binding_protein_AdcA	2137.04	-2.03086	0.132242	-15.3572	3.17134e-53	8.09694e-52
RS03030	50S_ribosomal_protein_L31_type_B	23776.4	-0.71278	0.0887502	-8.03131	9.64403e-16	5.87674e-15
RS03035	oligoribonuclease	1239.53	0.482427	0.120924	3.98951	6.6209e-05	0.00017276
RS03040	adenosine_deaminase	75.3559	-0.0891845	0.196719	-0.45336	0.650289	0.726667
RS03045	flavodoxin	993.026	-0.611757	0.13954	-4.38409	1.1647e-05	3.32277e-05
RS03050	chorismate_mutase	136.57	-0.0184726	0.167001	-0.110614	0.911923	0.938443
RS03055	voltage-gated_chloride_channel_protein	804.435	-0.12506	0.0946752	-1.32094	0.186521	0.2591
RS03060	50S_ribosomal_protein_L19	7596.39	-0.305726	0.08507	-3.59381	0.000325876	0.000775109
RS03070	hypothetical_protein	2.87965	0.29003	0.574324	0.504994	0.613563	0.694049
RS03075	transposase	200.627	-0.76234	0.178524	-4.27022	1.95276e-05	5.39919e-05
RS03090	ABC_transporter_permease	334.088	-1.333	0.179961	-7.40716	1.29033e-13	7.01506e-13
RS03095	ABC_transporter_ATP-binding_protein	246.282	-1.36128	0.205646	-6.61951	3.60386e-11	1.67103e-10
RS03100	peptide_ABC_transporter_permease	478.685	-1.1696	0.19284	-6.06512	1.31856e-09	5.42762e-09
RS03105	DNA-binding_response_regulator	111.257	-0.574743	0.197719	-2.90687	0.00365062	0.00732667
RS03110	two-component_sensor_histidine_kinase	290.725	-0.617596	0.13832	-4.46498	8.00776e-06	2.31731e-05
RS03115	IS3_family_transposase	29.4203	-1.12275	0.323861	-3.46677	0.000526749	0.00121841
RS03120	CsbD_family_protein	5749.38	1.74972	0.163128	10.7261	7.68031e-27	8.41912e-26
RS03125	rod_shape-determining_protein_RodA	1652.47	0.563942	0.0853728	6.60564	3.95804e-11	1.82269e-10
RS03130	hydrolase	783.206	-0.220694	0.108944	-2.02575	0.0427905	0.0696035
RS03135	DNA_gyrase_subunit_B	2861.78	-0.133132	0.0657119	-2.02599	0.0427656	0.0696035
RS03140	septation_ring_formation_regulator_EzrA	4761.39	-0.337992	0.0733805	-4.60603	4.10434e-06	1.21742e-05
RS03145	phosphoserine_phosphatase_SerB	186.653	-0.0922516	0.164025	-0.562424	0.573827	0.656873
RS03150	NUDIX_hydrolase	171.887	1.39191	0.161287	8.63001	6.13471e-18	4.2668e-17
RS03155	hypothetical_protein	154.549	1.51863	0.206023	7.37118	1.6913e-13	9.17028e-13
RS03160	enolase	44699.3	0.0238717	0.0982475	0.242975	0.808025	0.852398
RS03165	endonuclease	111.661	-1.04604	0.182692	-5.72573	1.02991e-08	3.9568e-08
RS03170	3-phosphoshikimate_1-carboxyvinyltransferase	836.805	0.627231	0.0875643	7.16309	7.88794e-13	4.14322e-12
RS03175	shikimate_kinase	372.191	0.265979	0.116117	2.29062	0.0219852	0.0382938
RS03180	LytR_family_transcriptional_regulator	1565.72	0.239805	0.0998733	2.40109	0.0163462	0.0294904
RS03185	RNA_methyltransferase	389.126	-0.433561	0.106575	-4.06814	4.73902e-05	0.000125441
RS03190	hypothetical_protein	149.251	-0.749845	0.154893	-4.84106	1.29147e-06	4.07013e-06
RS03195	acid_phosphatase/phosphotransferase	666.944	-0.443898	0.0927326	-4.78686	1.69413e-06	5.26512e-06
RS03200	ClbS/DfsB_family_four-helix_bundle_protein	594.225	-0.597778	0.104916	-5.69769	1.21443e-08	4.648e-08
RS03215	cell_wall_surface_anchor_protein	5.26417	-0.556254	0.528875	-1.05177	0.292906	0.382637
RS03220	IS3_family_transposase	414.565	-0.95128	0.145988	-6.51614	7.21394e-11	3.23345e-10
RS03230	molecular_chaperone_Hsp33	98.2226	-0.924704	0.189638	-4.87615	1.08174e-06	3.43063e-06
RS03235	YSIRK-targeted_surface_antigen_transcriptional_regulator	830.905	-0.500714	0.142368	-3.51705	0.000436367	0.00102343
RS03240	cell_wall_surface_anchor_protein	375.46	-0.603006	0.165313	-3.64767	0.00026463	0.000636184
RS03245	hypothetical_protein	35.7019	-0.145268	0.269019	-0.539993	0.589202	0.670666
RS03250	class_C_sortase	45.6619	-0.261866	0.244786	-1.06978	0.28472	0.37291
RS03255	class_C_sortase	34.1541	-0.571296	0.273467	-2.08909	0.0367	0.0606256
RS03260	cell_wall_surface_anchor_protein	238.486	-0.0671769	0.134677	-0.498799	0.617921	0.697843
RS03265	class_C_sortase	67.8759	0.134373	0.206401	0.651027	0.515029	0.606178
RS03270	hypothetical_protein	2.38072	0.281166	0.579941	0.484818	0.627805	0.706237
RS03275	hypothetical_protein	0.493535	0.0375295	0.406635	0.0922927	0.926465	0.949051
RS03285	hypothetical_protein	2.70851	0.494221	0.577658	0.85556	0.392241	0.490788
RS03290	serine_hydrolase	2088.57	0.59668	0.0984691	6.05956	1.36491e-09	5.6053e-09
RS03295	ABC_transporter_ATPase	91.5683	-1.10085	0.202411	-5.43866	5.36822e-08	1.94045e-07
RS03300	antibiotic_ABC_transporter_permease	87.3492	-1.12023	0.231204	-4.84518	1.26495e-06	3.99907e-06
RS03305	multidrug_ABC_transporter_permease	90.7522	-0.48106	0.182002	-2.64316	0.00821367	0.0155558
RS03310	hypothetical_protein	17.1593	0.509268	0.358576	1.42025	0.155535	0.221237
RS03315	hypothetical_protein	36.8855	0.251715	0.262465	0.959043	0.337537	0.432812
RS03320	SDR_family_oxidoreductase	38.1176	0.518003	0.273135	1.89651	0.057893	0.0920901
RS03325	acyl_carrier_protein	21.0328	-0.0147503	0.332725	-0.0443318	0.96464	0.976746
RS03330	beta-hydroxyacyl-ACP_dehydratase	37.937	0.168456	0.27741	0.607245	0.543688	0.630241
RS03335	ABC_transporter_ATP-binding_protein	63.8597	-0.0241022	0.227628	-0.105884	0.915675	0.940541
RS03340	ABC_transporter_permease	78.4281	-0.263851	0.202036	-1.30596	0.191567	0.265196
RS03345	hypothetical_protein	232.29	-0.127191	0.149251	-0.852195	0.394106	0.492815
RS03350	hypothetical_protein	104.802	-0.0653619	0.168906	-0.386973	0.698777	0.766412
RS03355	hypothetical_protein	279.14	-0.151328	0.136574	-1.10803	0.267847	0.354261
RS03360	hypothetical_protein	231.872	-0.00924363	0.139231	-0.0663907	0.947067	0.964278
RS03365	hypothetical_protein	190.596	-0.0748323	0.156861	-0.477063	0.633317	0.711644
RS03370	hypothetical_protein	15.7455	-2.27762	0.472229	-4.82312	1.41328e-06	4.43326e-06
RS03375	hypothetical_protein	28.8165	-2.09909	0.344587	-6.09162	1.11773e-09	4.62927e-09
RS03380	peptidase_S8	108.147	-2.19028	0.270261	-8.10433	5.30349e-16	3.31181e-15
RS03390	hypothetical_protein	144.103	-1.93855	0.220089	-8.80801	1.27391e-18	9.17672e-18
RS03395	peptidase_M13	9.37	0.912484	0.489266	1.86501	0.0621807	0.0980598
RS03400	peptidase_M13	8.40504	0.377851	0.461784	0.818242	0.413219	0.511641
RS03405	alpha/beta_hydrolase	12.6244	0.296427	0.40453	0.732767	0.4637	0.559046
RS03420	alpha/beta_hydrolase	16.7221	-0.124844	0.382837	-0.326102	0.744347	0.799464
RS03425	ABC_transporter_permease	16.621	0.568784	0.369489	1.53938	0.123711	0.18187
RS03430	permease	20.9398	1.1338	0.349783	3.24145	0.00118921	0.00259033
RS03440	hypothetical_protein	6.5285	0.722941	0.507005	1.42591	0.153896	0.219524
RS03445	multidrug_ABC_transporter_ATP-binding_protein	16.9015	1.18749	0.378611	3.13644	0.00171012	0.00362322
RS03450	hypothetical_protein	672.196	0.913814	0.101888	8.96879	2.99779e-19	2.23946e-18
RS03455	DNA-entry_nuclease	84.7177	-0.127481	0.282772	-0.450827	0.652115	0.72769
RS03460	cytochrome_o_ubiquinol_oxidase	1051.64	0.172136	0.090233	1.90768	0.0564324	0.0901221
RS03465	ABC_transporter_ATP-binding_protein	1010.96	0.328799	0.179439	1.83237	0.0668959	0.105167
RS03470	iron_export_ABC_transporter_permease_subunit_FetB	2576.62	0.443901	0.176671	2.51259	0.0119848	0.0221978
RS03475	phosphate_ABC_transporter_ATPase	138.215	0.492938	0.15224	3.2379	0.00120413	0.00261716
RS03480	LysR_family_transcriptional_regulator	561.926	-0.0393635	0.140881	-0.279409	0.779931	0.829268
RS03485	membrane_protein	89.7188	-0.552549	0.193197	-2.86002	0.00423611	0.00845128
RS03490	lactate_dehydrogenase	115.417	-0.447896	0.184127	-2.43254	0.0149934	0.027368
RS03495	glucuronide_permease	5.98394	0.811579	0.504756	1.60786	0.107865	0.161039
RS03500	2-dehydro-3-deoxygluconokinase	25.3822	0.401451	0.311628	1.28824	0.197662	0.27214
RS03505	beta-glucuronidase	99.9386	0.479308	0.178839	2.68011	0.00735975	0.0140841
RS03510	GntR_family_transcriptional_regulator	946.48	0.915268	0.109102	8.38911	4.89825e-17	3.15648e-16
RS03515	2-dehydro-3-deoxyphosphooctonate_aldolase	17.9576	0.21119	0.368253	0.573493	0.566311	0.650854
RS03520	uronate_isomerase	41.5872	0.714916	0.29511	2.42254	0.0154124	0.027981
RS03525	mannonate_dehydratase	30.8564	0.394005	0.363425	1.08415	0.278301	0.365689
RS03530	dioxygenase	37.5432	0.165154	0.284296	0.580922	0.561293	0.646561
RS03535	haloacid_dehalogenase	28.6034	0.366129	0.298027	1.22851	0.219256	0.29669
RS03540	beta-hexosamidase	89.0665	0.419559	0.190822	2.19869	0.0278998	0.0473796
RS03545	dipeptidase	2005.09	1.15705	0.134548	8.5995	8.00634e-18	5.49279e-17
RS03550	catabolite_control_protein_A	2452.36	-0.749578	0.110977	-6.75437	1.43456e-11	6.88931e-11
RS03555	alpha-amylase	644.609	0.345484	0.12499	2.7641	0.005708	0.0111777
RS03560	glycosyl_transferase_family_1	1561.96	0.278821	0.0878655	3.17327	0.00150731	0.00322744
RS03565	12C2-diacylglycerol_3-glucosyltransferase	2525.34	0.0879974	0.0716391	1.22834	0.219318	0.29669
RS03570	threonine--tRNA_ligase	3478.29	-0.287811	0.120952	-2.37955	0.017334	0.0310779
RS03575	DNA-binding_response_regulator	33.9376	-0.776471	0.294067	-2.64045	0.00827948	0.0156647
RS03580	hypothetical_protein	455.68	0.882263	0.119776	7.36593	1.75918e-13	9.48734e-13
RS03585	peptidase	4530.03	0.15519	0.108917	1.42484	0.154203	0.219808
RS03590	glutamine_ABC_transporter_permease	2029.01	0.953118	0.361094	2.63953	0.00830219	0.0156647
RS03595	glutamine_ABC_transporter_permease	1354.14	0.827777	0.415932	1.99017	0.0465718	0.0751482
RS03600	amino_acid_ABC_transporter_substrate-binding_protein	1483.34	1.05054	0.381194	2.75592	0.00585273	0.0114389
RS03605	arginine_ABC_transporter_ATP-binding_protein	1386.11	1.14572	0.360356	3.17941	0.00147578	0.00316327
RS03610	DNA-binding_response_regulator	829.113	0.139383	0.0880726	1.58259	0.113514	0.168476
RS03615	cell_wall_metabolism_sensor_histidine_kinase_VicK	1544.61	0.050839	0.0848282	0.599317	0.548961	0.634894
RS03620	metallo-hydrolase	1041.67	-0.0383255	0.0850568	-0.450587	0.652288	0.72769
RS03625	hypothetical_protein	782.811	-0.217846	0.090699	-2.40185	0.0163122	0.0294819
RS03630	ribonuclease_3	820.401	0.194741	0.0925784	2.10353	0.0354196	0.0586064
RS03635	chromosome_segregation_protein_SMC	2843.52	-0.275227	0.0691852	-3.97812	6.94625e-05	0.000180782
RS03640	haloacid_dehalogenase	541.414	0.379649	0.127145	2.98597	0.00282685	0.00576517
RS03645	haloacid_dehalogenase	715.879	0.138377	0.0917867	1.50759	0.131659	0.191047
RS03650	signal_recognition_particle-docking_protein_FtsY	1447.27	0.130219	0.0798943	1.62989	0.103124	0.154879
RS03655	group_II_intron_reverse_transcriptase/maturase	135.586	1.14269	0.165479	6.90534	5.00843e-12	2.48818e-11
RS03660	phosphate_ABC_transporter_substrate-binding_protein	2609.5	1.47886	0.0955348	15.4799	4.74529e-54	1.27617e-52
RS03665	ABC_transporter_permease	2740.03	1.74293	0.143315	12.1615	4.98321e-34	7.44528e-33
RS03670	hypothetical_protein	469.145	2.10555	0.117952	17.8509	2.84463e-71	1.06252e-69
RS03675	N52CN10-methylene_tetrahydromethanopterin_reductase	122.07	-0.736627	0.183187	-4.02118	5.79064e-05	0.00015208
RS03680	S1_RNA-binding_protein	1407.05	-0.236011	0.0845885	-2.79011	0.00526908	0.0103685
RS03685	SprT_family_protein	349.736	-0.224105	0.128049	-1.75016	0.0800912	0.123599
RS03690	phage_shock_protein_C	3768.69	2.7178	0.132398	20.5275	1.22233e-93	1.23272e-91
RS03695	HPr_kinase/phosphorylase	2229.72	0.503784	0.099833	5.04627	4.50514e-07	1.49948e-06
RS03700	prolipoprotein_diacylglyceryl_transferase	1662.76	0.509922	0.122154	4.1744	2.98766e-05	8.08874e-05
RS03705	DUF948_domain_containing_protein	1277.36	0.580062	0.123046	4.71418	2.42689e-06	7.37203e-06
RS03710	hypothetical_protein	3225.51	0.570685	0.197293	2.89257	0.00382099	0.00766098
RS03715	hypothetical_protein	8562.89	-1.2944	0.170181	-7.60602	2.82673e-14	1.60155e-13
RS03720	peptidase_U32	291.743	-1.03587	0.216679	-4.78066	1.74721e-06	5.41341e-06
RS03725	collagenase-like_protease	634.899	-1.00599	0.238767	-4.21327	2.51704e-05	6.86065e-05
RS03730	hypothetical_protein	524.922	-0.0780093	0.110762	-0.704294	0.48125	0.574367
RS03735	hypothetical_protein	173.952	0.822695	0.17835	4.61281	3.97266e-06	1.18228e-05
RS03740	manganese_transporter	1516.47	0.79898	0.112454	7.10493	1.20381e-12	6.19411e-12
RS03745	bifunctional_diaminohydroxyphosphoribosylaminopyrimidine_deaminase/5-amino-6-(5-phosphoribosylamino)uracil_reductase	233.892	1.19207	0.222592	5.35541	8.53634e-08	3.0313e-07
RS03750	riboflavin_synthase	95.1378	1.13584	0.257849	4.40505	1.0576e-05	3.03871e-05
RS03755	bifunctional_32C4-dihydroxy-2-butanone-4-phosphate_synthase/GTP_cyclohydrolase_II	273.756	1.12297	0.204553	5.48987	4.02239e-08	1.46978e-07
RS03760	62C7-dimethyl-8-ribityllumazine_synthase	175.972	1.09076	0.232496	4.6915	2.71205e-06	8.22587e-06
RS03765	lysine--tRNA_ligase	3578.88	-0.924048	0.078019	-11.8439	2.31474e-32	3.21989e-31
RS03770	haloacid_dehalogenase	762.068	-0.720536	0.114269	-6.30562	2.87049e-10	1.24511e-09
RS03775	histidine_phosphatase_family_protein	283.56	0.314381	0.126455	2.4861	0.0129152	0.0238117
RS03780	aminoacyl-tRNA_deacylase	154.236	0.105719	0.160313	0.65945	0.509607	0.601449
RS03785	epimerase	161.896	-0.237289	0.202113	-1.17404	0.240378	0.321301
RS03790	N-acetylmuramoyl-L-alanine_amidase	1378	-0.678318	0.10499	-6.46077	1.04173e-10	4.61796e-10
RS03795	ECF_transporter_S_component	630.946	0.313871	0.104131	3.01419	0.00257667	0.00528703
RS03800	hypothetical_protein	1812.64	0.139399	0.147554	0.944732	0.344796	0.440439
RS03805	oligoendopeptidase_F	1726.76	0.917255	0.0886708	10.3445	4.43222e-25	4.49236e-24
RS03810	phosphoenolpyruvate_carboxylase	4192.63	-0.661268	0.0931031	-7.10254	1.22485e-12	6.28633e-12
RS03815	cell_division_protein	1220.02	-0.17233	0.0914098	-1.88525	0.0593965	0.0940367
RS03820	elongation_factor_Tu	92018.3	-0.185647	0.0942239	-1.97027	0.048807	0.0786291
RS03825	triose-phosphate_isomerase	12973	0.119713	0.119332	1.00319	0.315771	0.409063
RS03830	22C3-bisphosphoglycerate-dependent_phosphoglycerate_mutase	23716.6	-0.0320296	0.0811775	-0.394563	0.693165	0.762746
RS03835	penicillin-binding_protein_2B	2792.42	1.03355	0.0782387	13.2102	7.65996e-40	1.34349e-38
RS03840	recombination_protein_RecR	1185.23	0.72217	0.0943488	7.65426	1.9443e-14	1.11728e-13
RS03845	D-alanine--D-alanine_ligase	3087.34	-0.308861	0.0719158	-4.29476	1.74883e-05	4.86537e-05
RS03850	UDP-N-acetylmuramoyl-tripeptide--D-alanyl-D-alanine_ligase	1840.93	0.511203	0.0774431	6.60101	4.08354e-11	1.86769e-10
RS03855	MFS_transporter	408.364	-2.0295	0.193407	-10.4934	9.26217e-26	9.83253e-25
RS03860	membrane_protein	162.227	-0.831218	0.149735	-5.55127	2.83603e-08	1.04575e-07
RS03865	cell_surface_protein	87.9981	-0.471328	0.206948	-2.27751	0.0227556	0.0394992
RS03870	peptide_chain_release_factor_3	1551.47	-0.767232	0.0911953	-8.41307	3.99431e-17	2.59533e-16
RS03875	helicase	433.533	0.692363	0.104657	6.61554	3.70192e-11	1.71256e-10
RS03880	ABC_transporter_ATP-binding_protein	202.402	-1.27954	0.257913	-4.96114	7.0079e-07	2.28721e-06
RS03885	ABC_transporter_permease	211.347	-1.47771	0.232373	-6.35918	2.02829e-10	8.8743e-10
RS03890	hypothetical_protein	356.183	-0.978208	0.253009	-3.8663	0.000110499	0.000282121
RS03895	RNA_helicase	8734.4	-0.620655	0.156523	-3.96526	7.33164e-05	0.000190566
RS03900	hypothetical_protein	173.853	-0.498293	0.14572	-3.41952	0.000627323	0.00143622
RS03905	methyltransferase	190.835	-0.167267	0.146878	-1.13882	0.25478	0.338978
RS03910	1-acyl-sn-glycerol-3-phosphate_acyltransferase	1303.93	-0.071173	0.100894	-0.705421	0.480548	0.574178
RS03915	competence_protein_CelA	2.38459	-0.198037	0.576813	-0.343331	0.73135	0.792302
RS03920	DNA_internalization-related_competence_protein_ComEC/Rec2	30.4824	-0.0882328	0.313216	-0.2817	0.778174	0.828117
RS03925	haloacid_dehalogenase	178.905	0.507082	0.155493	3.26112	0.00110974	0.00245165
RS03930	LacI_family_transcriptional_regulator	329.075	0.743553	0.114493	6.49432	8.34111e-11	3.73038e-10
RS03935	hypothetical_protein	881.864	0.301162	0.0987476	3.04981	0.00228983	0.00473217
RS03940	methyltransferase	100.791	0.0494227	0.184262	0.26822	0.78853	0.83703
RS03945	DNA_polymerase_III_subunit_delta	677.522	-0.23669	0.100177	-2.36272	0.0181413	0.0322957
RS03950	superoxide_dismutase_[Mn/Fe]	7282.83	0.187885	0.127298	1.47594	0.139959	0.201641
RS03955	transcription_antiterminator_BglG	23.3785	-0.748658	0.320744	-2.33413	0.0195889	0.0344708
RS03960	PTS_beta-glucoside_transporter_subunit_EIIBCA	30.1744	-1.14481	0.301388	-3.79847	0.000145592	0.000366157
RS03965	6-phospho-beta-glucosidase	131.16	-0.26628	0.175727	-1.5153	0.129696	0.188813
RS03970	PucR_family_transcriptional_regulator	299.624	0.654581	0.137409	4.76372	1.90052e-06	5.87036e-06
RS03975	glycerate_kinase	24.4663	-1.05445	0.323855	-3.25595	0.00113014	0.00248853
RS03980	gluconate_proton_symporter	37.2882	-0.313543	0.364473	-0.860264	0.389643	0.488143
RS03985	hypothetical_protein	414.252	-0.139355	0.124026	-1.1236	0.261184	0.347041
RS03995	tRNA_preQ1(34)_S-adenosylmethionine_ribosyltransferase-isomerase_QueA	1120.49	-0.350029	0.124886	-2.80278	0.00506643	0.00998924
RS04000	membrane_protein	972.053	0.704236	0.373707	1.88446	0.0595028	0.0941312
RS04005	glucosamine-6-phosphate_deaminase	1467.06	-0.109924	0.152769	-0.719546	0.471805	0.567122
RS04010	glutathione-dependent_reductase	399.776	0.968054	0.114264	8.47211	2.40987e-17	1.59367e-16
RS04015	16S_rRNA_pseudouridine(516)_synthase	108.46	-0.246384	0.171478	-1.43682	0.150769	0.215481
RS04025	competence_protein_CoiA	44.4563	0.819157	0.252639	3.2424	0.00118527	0.00258454
RS04030	oligoendopeptidase_F	1821.75	0.0712997	0.100659	0.708332	0.478739	0.573067
RS04035	haloacid_dehalogenase	238.432	-0.304626	0.128516	-2.37034	0.0177719	0.0317221
RS04040	O-methyltransferase	893.568	-0.128709	0.124084	-1.03727	0.299608	0.39035
RS04045	foldase	3754.48	0.387632	0.0770456	5.0312	4.87428e-07	1.61701e-06
RS04050	hypothetical_protein	555.408	-0.246906	0.106193	-2.32508	0.0200678	0.0352586
RS04055	alanine--tRNA_ligase	3389.68	-0.36563	0.100894	-3.62392	0.000290174	0.000694284
RS04060	membrane_protein	456.283	-0.25943	0.118769	-2.18432	0.0289384	0.048967
RS04065	glycosyl_transferase	151.167	1.09591	0.170058	6.44437	1.16084e-10	5.12343e-10
RS04070	hypothetical_protein	2.08166	0.0799776	0.580103	0.137868	0.890345	0.922829
RS04075	hypothetical_protein	6.76058	-0.217834	0.512941	-0.424677	0.671072	0.744167
RS04080	transcriptional_regulator	4.61604	-0.553203	0.53827	-1.02774	0.304071	0.395429
RS04085	membrane_protein	22.5827	0.272915	0.327505	0.833315	0.404667	0.504082
RS04090	energy-coupled_thiamine_transporter_ThiT	467.999	-0.756861	0.144467	-5.23899	1.61458e-07	5.60518e-07
RS04095	ribonucleoside-diphosphate_reductase	7220.65	0.852778	0.0820052	10.3991	2.50359e-25	2.56332e-24
RS04100	ribonucleoside-diphosphate_reductase_subunit_alpha	17008.5	0.863231	0.100082	8.62522	6.39683e-18	4.41863e-17
RS04105	NrdH-redoxin	2531.31	0.823663	0.0975047	8.44742	2.97814e-17	1.95665e-16
RS04110	phosphocarrier_protein_HPr	10876.4	-0.540857	0.12512	-4.32269	1.54135e-05	4.31793e-05
RS04115	phosphoenolpyruvate--protein_phosphotransferase	27543.8	-0.485051	0.0947642	-5.11851	3.07959e-07	1.03698e-06
RS04120	NADP-dependent_glyceraldehyde-3-phosphate_dehydrogenase	7389.73	0.14068	0.0836046	1.68268	0.0924373	0.140349
RS04125	polysaccharide_deacetylase	560.349	-0.56205	0.110752	-5.07485	3.87801e-07	1.29707e-06
RS04130	RNA_helicase	1414.56	0.251188	0.085014	2.95467	0.00313008	0.00634509
RS04135	uridine_kinase	989.519	-0.829024	0.128509	-6.45108	1.11058e-10	4.91239e-10
RS04140	hypothetical_protein	690.463	0.385029	0.123407	3.11999	0.0018086	0.00379994
RS04145	DNA_polymerase_III_subunit_gamma/tau	2457.51	-0.0243021	0.085847	-0.283087	0.77711	0.828015
RS04150	membrane_protein	149.652	-0.146791	0.15875	-0.924669	0.355138	0.451648
RS04155	bifunctional_biotin--[acetyl-CoA-carboxylase]_synthetase/biotin_operon_repressor	329.661	1.3926	0.133559	10.4269	1.86983e-25	1.92421e-24
RS04160	S-adenosylmethionine_synthase	1825.62	-0.220589	0.0778788	-2.83246	0.00461907	0.00915193
RS04165	hypothetical_protein	116.017	-0.200123	0.186114	-1.07527	0.282255	0.370162
RS04170	hypothetical_protein	26.6906	0.614855	0.316358	1.94354	0.051951	0.0834277
RS04175	hypothetical_protein	15.3933	0.305011	0.390539	0.780998	0.434803	0.533454
RS04180	hypothetical_protein	11.0159	-0.470938	0.435209	-1.0821	0.27921	0.366645
RS04185	ABC_transporter_permease	9.45741	-0.0113634	0.463118	-0.0245367	0.980425	0.983973
RS04190	ABC_transporter_ATP-binding_protein	21.7614	-0.785573	0.357155	-2.19953	0.0278404	0.0473474
RS04195	ABC_transporter	12.9576	-0.596409	0.446423	-1.33597	0.181558	0.253603
RS04200	thiaminase_II	13.1791	-0.387843	0.444426	-0.872684	0.382836	0.48201
RS04205	bifunctional_hydroxymethylpyrimidine_kinase/phosphomethylpyrimidine_kinase	16.7544	-0.578552	0.385351	-1.50136	0.133262	0.192819
RS04210	hydroxyethylthiazole_kinase	14.0114	-0.850357	0.397789	-2.13771	0.0325402	0.0543775
RS04215	thiamine_phosphate_synthase	18.7691	-0.481141	0.362244	-1.32822	0.184104	0.256618
RS04220	UDP-N-acetylglucosamine_1-carboxyvinyltransferase	2289.15	-0.436386	0.0784894	-5.55981	2.70065e-08	9.97659e-08
RS04225	RimJ/RimL_family_protein_N-acetyltransferase	301.595	0.00623247	0.112789	0.055258	0.955933	0.96939
RS04230	hypothetical_protein	758.436	-0.0682871	0.114921	-0.594211	0.552371	0.637375
RS04235	methionine_aminopeptidase	858.298	-0.0477142	0.0958758	-0.497667	0.618719	0.698352
RS04240	hypothetical_protein	1171.77	-0.308809	0.0987038	-3.12865	0.00175612	0.00371678
RS04245	sugar_translocase	80.684	0.1327	0.233587	0.568095	0.56997	0.65357
RS04250	queuosine_transporter_QueT	4619.79	-0.0918161	0.0834016	-1.10089	0.270943	0.357419
RS04255	DNA_ligase_(NAD(+))_LigA	1156.26	-0.134651	0.0822044	-1.638	0.101421	0.152889
RS04260	diacylglycerol_kinase	580.215	-0.285354	0.104196	-2.73862	0.00616986	0.0120006
RS04265	type_I_pullulanase	1997.56	-0.348625	0.0706874	-4.93192	8.1424e-07	2.63615e-06
RS04270	glycogen-branching_enzyme	270.938	0.125152	0.170974	0.731994	0.464172	0.55928
RS04275	glucose-1-phosphate_adenylyltransferase	143.603	0.322431	0.162374	1.98573	0.0470634	0.0758808
RS04280	glucose-1-phosphate_adenylyltransferase_subunit_GlgD	132.214	0.686416	0.229492	2.99102	0.00278046	0.00568782
RS04285	starch_synthase	203.617	0.306224	0.146369	2.09214	0.0364259	0.0602221
RS04290	F0F1_ATP_synthase_subunit_C	4778.99	0.710692	0.148011	4.8016	1.57399e-06	4.92208e-06
RS04295	ATP_synthase_subunit_A	10247.7	0.5901	0.137351	4.29628	1.73685e-05	4.83872e-05
RS04300	ATP_synthase_subunit_B	5156.88	0.555769	0.120486	4.61273	3.97414e-06	1.18228e-05
RS04305	F0F1_ATP_synthase_subunit_delta	7008.76	0.597695	0.120566	4.95741	7.14388e-07	2.32782e-06
RS04310	ATP_synthase_subunit_alpha	20053.9	0.594131	0.0958772	6.1968	5.76236e-10	2.42139e-09
RS04315	ATP_synthase_subunit_gamma	12242.3	0.54574	0.111028	4.91536	8.86215e-07	2.85087e-06
RS04320	ATP_synthase_subunit_beta	19862.9	0.564988	0.109794	5.14589	2.6625e-07	9.04085e-07
RS04325	F0F1_ATP_synthase_subunit_epsilon	10478.9	0.413173	0.127253	3.24686	0.00116688	0.0025527
RS04330	membrane_protein	152.708	0.357216	0.158778	2.24979	0.0244625	0.0422438
RS04335	UDP-N-acetylglucosamine_1-carboxyvinyltransferase	2275.6	0.370083	0.0744054	4.97387	6.56302e-07	2.14896e-06
RS04340	DNA-directed_RNA_polymerase_subunit_beta	868.616	0.33115	0.120215	2.75465	0.00587546	0.0114722
RS04345	DNA-entry_nuclease	683.098	0.189449	0.104975	1.80471	0.0711204	0.110687
RS04350	phenylalanine--tRNA_ligase_subunit_alpha	1073.95	-0.252096	0.0950828	-2.65133	0.00801747	0.0152415
RS04355	GNAT_family_N-acetyltransferase	722.099	-0.318152	0.0942157	-3.37685	0.000733218	0.00165425
RS04360	phenylalanine--tRNA_ligase_subunit_beta	2816.21	-0.471501	0.0961358	-4.90453	9.36527e-07	3.00314e-06
RS04365	hypothetical_protein	478.221	1.37574	0.137899	9.9764	1.93354e-23	1.81393e-22
RS04370	ATP-dependent_nuclease_subunit_B	831.679	0.0288435	0.0885996	0.325549	0.744766	0.799464
RS04375	helicase-exonuclease_AddAB_subunit_AddA	1613.44	0.0987325	0.0812506	1.21516	0.224305	0.302625
RS04380	magnesium_transporter	816.723	-0.0793078	0.0921002	-0.861104	0.389181	0.488143
RS04385	tRNA_uridine-5-carboxymethylaminomethyl(34)_synthesis_GTPase_MnmE	1093.82	-0.0119387	0.105525	-0.113136	0.909923	0.936863
RS04390	multidrug_ABC_transporter_ATP-binding_protein	926.601	0.13212	0.0796292	1.65919	0.0970783	0.147002
RS04395	pyruvate_dehydrogenase_E1_subunit_alpha	10259.5	-0.186726	0.122683	-1.52202	0.128005	0.186955
RS04400	pyruvate_dehydrogenase_subunit_beta	6572.16	-0.184585	0.148636	-1.24186	0.21429	0.290863
RS04405	branched-chain_alpha-keto_acid_dehydrogenase_subunit_E2	5780.82	0.0508705	0.171942	0.295858	0.767339	0.819768
RS04410	dihydrolipoyl_dehydrogenase	11920.3	0.0599006	0.172186	0.347882	0.727929	0.791073
RS04415	lipoate--protein_ligase_A	1076.69	-0.779552	0.183838	-4.24043	2.23089e-05	6.11372e-05
RS04420	group_II_intron_reverse_transcriptase/maturase	147.51	1.3467	0.192765	6.98625	2.82326e-12	1.42008e-11
RS04425	glutamine_amidotransferase	822.555	0.00427933	0.0927975	0.0461147	0.963219	0.976288
RS04430	UDP-N-acetylmuramyl_peptide_synthase	1282.85	0.580933	0.102023	5.69413	1.24003e-08	4.72805e-08
RS04435	membrane_protein	1110.92	0.13463	0.0886886	1.51801	0.129012	0.188018
RS04440	hypothetical_protein	986.072	-0.0084199	0.0784526	-0.107325	0.914531	0.940168
RS04445	phosphoglucosamine_mutase	2968.17	-0.0681693	0.110693	-0.615841	0.538	0.626889
RS04450	hypothetical_protein	89.4565	0.484926	0.198055	2.44845	0.0143473	0.0263078
RS04455	hypothetical_protein	203.554	0.833294	0.142214	5.85946	4.64379e-09	1.84018e-08
RS04460	coproporphyrinogen_III_oxidase	917.298	-0.157025	0.0963174	-1.63029	0.103041	0.154869
RS04465	acyl-ACP_thioesterase	426.711	-0.802451	0.114943	-6.9813	2.92468e-12	1.46379e-11
RS04470	haloacid_dehalogenase	558.464	-0.420455	0.136401	-3.08249	0.00205275	0.0042817
RS04475	membrane_protein	823.033	-0.506407	0.0932074	-5.43312	5.53766e-08	1.99811e-07
RS04480	type_II_CRISPR_RNA-guided_endonuclease_Cas9	161.084	4.52464	0.243175	18.6065	2.84582e-77	1.26766e-75
RS04485	subtype_II_CRISPR-associated_endonuclease_Cas1	123.884	-0.75377	0.174322	-4.324	1.53226e-05	4.29843e-05
RS04490	CRISPR-associated_endonuclease_Cas2	34.4534	-0.614309	0.28219	-2.17693	0.0294857	0.0494781
RS04495	type_II-A_CRISPR-associated_protein_Csn2	155.138	-0.264552	0.145185	-1.82218	0.0684283	0.107242
RS04505	nucleoside-diphosphate_kinase	4995.94	2.68891	0.0934465	28.7749	4.42425e-182	1.48729e-179
RS04510	elongation_factor_4	3406.74	0.150593	0.0730628	2.06115	0.0392887	0.0644271
RS04515	hypothetical_protein	106.519	-0.914787	0.2153	-4.24889	2.14831e-05	5.91152e-05
RS04520	phosphohydrolase	326.289	1.10908	0.120258	9.2225	2.90249e-20	2.26036e-19
RS04525	N-acetyltransferase	307.915	1.01975	0.115843	8.80288	1.33354e-18	9.57206e-18
RS04530	peptide-methionine_(R)-S-oxide_reductase	447.672	1.18039	0.129763	9.09653	9.32675e-20	7.0722e-19
RS04535	haloacid_dehalogenase	911.454	1.48524	0.130364	11.393	4.53155e-30	5.67711e-29
RS04540	hypothetical_protein	282.442	0.746995	0.137868	5.41821	6.01999e-08	2.16441e-07
RS04545	hypothetical_protein	494.237	0.451405	0.112236	4.02193	5.77242e-05	0.000151799
RS04550	TVP38/TMEM64_family_protein	485	0.486271	0.127068	3.82684	0.000129799	0.000328901
RS04555	hypothetical_protein	3567.32	0.320454	0.0871833	3.67563	0.000237263	0.000575813
RS04560	multidrug_ABC_transporter_ATP-binding_protein	1964.81	0.142661	0.089195	1.59943	0.109724	0.163452
RS04565	GntR_family_transcriptional_regulator	1222.15	0.0656327	0.114967	0.570881	0.56808	0.652307
RS04570	DNA_polymerase_III_subunit_alpha	694.175	0.394708	0.0971461	4.06304	4.84386e-05	0.000127881
RS04575	6-phosphofructokinase	7929.81	-0.229355	0.107197	-2.13956	0.0323903	0.0541718
RS04580	pyruvate_kinase	18668.8	-0.224673	0.11271	-1.99337	0.0462207	0.0746415
RS04585	signal_peptidase_I	1116.72	-0.0621499	0.101807	-0.610467	0.541553	0.62918
RS04590	glutamine--fructose-6-phosphate_aminotransferase	10147.6	3.14379	0.182424	17.2334	1.49157e-66	5.27808e-65
RS04595	hypothetical_protein	509.514	-2.46022	0.132498	-18.5681	5.82652e-77	2.50045e-75
RS04600	amino_acid_ABC_transporter_permease	350.237	0.233142	0.115215	2.02353	0.0430182	0.0698762
RS04605	amino_acid_ABC_transporter_ATP-binding_protein	524.384	-0.0633202	0.119308	-0.53073	0.595606	0.677191
RS04610	glutamine_ABC_transporter_substrate-binding_protein	1087.18	-0.0849777	0.111805	-0.76005	0.447225	0.544717
RS04615	30S_ribosomal_protein_S20	12878.8	0.2489	0.10361	2.40228	0.0162933	0.0294741
RS04620	type_I_pantothenate_kinase	370.937	0.105082	0.145475	0.722335	0.470089	0.565442
RS04625	methyltransferase	367.075	-1.21123	0.125272	-9.6688	4.09136e-22	3.57241e-21
RS04630	cytidine_deaminase	314.213	-1.07208	0.133274	-8.04416	8.6838e-16	5.30764e-15
RS04635	BMP_family_ABC_transporter_substrate-binding_protein	3073.16	-0.585538	0.165908	-3.52929	0.000416676	0.000980672
RS04640	sugar_ABC_transporter_ATP-binding_protein	1404.86	-1.85209	0.115121	-16.0881	3.09201e-58	8.90939e-57
RS04645	ABC_transporter_permease	1613.42	-1.95	0.127163	-15.3346	4.48961e-53	1.13194e-51
RS04650	ABC_transporter_permease	3035.52	-2.18075	0.116668	-18.692	5.75417e-78	2.69911e-76
RS04655	NADH_oxidase	3011.89	-1.47156	0.114283	-12.8765	6.10518e-38	1.00936e-36
RS04660	L-lactate_dehydrogenase	19083.1	0.108267	0.14218	0.761475	0.446374	0.544009
RS04665	DNA_gyrase_subunit_A	2826.95	-0.543131	0.0701759	-7.73956	9.9758e-15	5.78195e-14
RS04670	class_A_sortase	1221.43	-0.604738	0.078715	-7.68264	1.55847e-14	8.98125e-14
RS04675	glyoxalase	835.601	-0.726404	0.135738	-5.35153	8.72124e-08	3.0861e-07
RS04680	hypothetical_protein	3318.05	2.43336	0.118333	20.5637	5.80792e-94	6.16557e-92
RS04685	sodium_proton_antiporter	900.726	-0.914753	0.145679	-6.27922	3.40271e-10	1.46651e-09
RS04690	hypothetical_protein	0.424199	-0.273762	0.332722	-0.822796	0.410624	0.50874
RS04695	hypothetical_protein	1.12141	-0.250342	0.553682	-0.452141	0.651167	0.727245
RS04700	hypothetical_protein	1.44538	0.101538	0.574045	0.176881	0.859602	0.895566
RS04705	cell_division_protein_FtsK	1.48173	-0.211649	0.575757	-0.367602	0.71317	0.779656
RS04710	Cro/Cl_family_transcriptional_regulator	1.89749	0.266595	0.576229	0.462655	0.643611	0.721603
RS04715	hypothetical_protein	0.545978	0.343951	0.463701	0.741751	0.458238	0.554449
RS04720	hypothetical_protein	0.986559	-0.319009	0.443922	-0.718616	0.472378	0.56729
RS04725	hypothetical_protein	82.4325	0.17315	0.192236	0.900718	0.367738	0.466189
RS04730	antirestriction_protein_ArdA	1.91401	0.00307246	0.579616	0.00530086	0.995771	0.996264
RS04735	hypothetical_protein	72.9162	-0.0748703	0.215976	-0.34666	0.728847	0.79157
RS04740	conjugal_transfer_protein	2.43552	0.153794	0.577883	0.266133	0.790137	0.83703
RS04745	ATP/GTP-binding_protein	5.98476	-0.783033	0.544848	-1.43716	0.150673	0.215481
RS04750	hypothetical_protein	2.12779	-0.490586	0.579999	-0.845839	0.397643	0.496428
RS04755	peptidase_P60	0.47866	0.243888	0.441633	0.552241	0.580783	0.663533
RS04760	conjugal_transfer_protein	2.34982	0.153529	0.579849	0.264773	0.791184	0.837463
RS04765	tetracycline_resistance_ribosomal_protection_protein_Tet(M)	576.603	-1.15513	0.0978619	-11.8037	3.73519e-32	5.12508e-31
RS04770	transcriptional_regulator	19.1506	-0.649107	0.359665	-1.80475	0.0711133	0.110687
RS04775	DNA-directed_RNA_polymerase_sigma-70_factor	0.424199	-0.273762	0.332722	-0.822796	0.410624	0.50874
RS04780	hypothetical_protein	0.693998	-0.15939	0.519553	-0.306783	0.759009	0.812159
RS04785	hypothetical_protein	84.5949	0.535478	0.18944	2.82664	0.00470386	0.00931078
RS04790	site-specific_integrase	209.721	0.439326	0.163755	2.68283	0.00730021	0.0139834
RS04795	GMP_synthase_(glutamine-hydrolyzing)	4327.74	-0.22167	0.0779922	-2.84221	0.00448016	0.00890293
RS04800	GntR_family_transcriptional_regulator	410.389	0.807673	0.138757	5.82075	5.85838e-09	2.3124e-08
RS04805	FADH(2)-oxidizing_methylenetetrahydrofolate--tRNA-(uracil(54)-C(5))-methyltransferase_TrmFO	2475.31	0.297527	0.0847364	3.51121	0.000446074	0.00104256
RS04810	N-acetyltransferase	314.591	0.35095	0.13848	2.53431	0.011267	0.0209646
RS04815	O-sialoglycoprotein_endopeptidase	750.909	0.34212	0.0930872	3.67527	0.000237602	0.000575813
RS04825	peptidase_S41	21.7512	0.739904	0.348438	2.12349	0.0337127	0.056012
RS04830	ABC_transporter_ATP-binding_protein	108.785	1.0215	0.179621	5.68699	1.293e-08	4.92073e-08
RS04835	ABC_transporter_permease	336.244	0.951855	0.112373	8.47051	2.44322e-17	1.61045e-16
RS04840	DNA-binding_response_regulator	202.911	1.62487	0.172952	9.39493	5.72557e-21	4.73298e-20
RS04845	sensor_histidine_kinase	377.398	1.41423	0.121953	11.5965	4.29301e-31	5.55065e-30
RS04850	tyrosine_recombinase_XerS	218.483	0.772594	0.137129	5.63408	1.75992e-08	6.61034e-08
RS04855	ABC_transporter_substrate-binding_protein	58.5557	0.368939	0.239883	1.538	0.124049	0.182233
RS04860	membrane_protein	212.283	0.131458	0.176407	0.745197	0.456153	0.552589
RS04865	DNA-binding_protein	114.602	0.0469419	0.200129	0.234559	0.814551	0.857489
RS04870	signal_recognition_particle_protein	2307.55	0.178709	0.0796594	2.24342	0.0248698	0.0428739
RS04875	DNA-binding_protein	421.451	-0.315451	0.113591	-2.77708	0.00548495	0.0107618
RS04880	two-component_sensor_histidine_kinase	1810.77	1.10177	0.0882731	12.4814	9.43486e-36	1.46385e-34
RS04885	DNA-binding_response_regulator	665.799	1.19195	0.101449	11.7492	7.12759e-32	9.58423e-31
RS04890	aminopeptidase	7756.65	1.00153	0.0733856	13.6475	2.09037e-42	4.05412e-41
RS04895	phosphate_transport_system_regulatory_protein_PhoU	2203.01	-0.983246	0.132462	-7.42287	1.14613e-13	6.26488e-13
RS04900	phosphate_ABC_transporter_ATP-binding_protein	1584.48	-0.979689	0.111862	-8.75805	1.98661e-18	1.4159e-17
RS04905	phosphate_ABC_transporter_ATP-binding_protein	1125.14	-0.716884	0.112445	-6.3754	1.82491e-10	8.01927e-10
RS04910	phosphate_ABC_transporter2C_permease_protein_PstA	1068.89	-0.618719	0.113628	-5.44514	5.1765e-08	1.87788e-07
RS04915	phosphate_ABC_transporter_permease_subunit_PstC	1180.14	-0.634144	0.0943374	-6.72209	1.79133e-11	8.48872e-11
RS04920	phosphate_ABC_transporter_substrate-binding_protein	779.275	-0.673	0.100119	-6.72197	1.79286e-11	8.48872e-11
RS04925	23S_rRNA_methyltransferase	376.08	-0.375939	0.121372	-3.0974	0.00195226	0.00408053
RS04930	myo-inositol-1(or_4)-monophosphatase	1753.76	-0.664078	0.0720886	-9.21196	3.20216e-20	2.48217e-19
RS04935	hypothetical_protein	345.897	-0.471387	0.113545	-4.15156	3.30219e-05	8.89254e-05
RS04940	regulatory_protein_Spx	1053.92	-0.109766	0.120797	-0.908677	0.363521	0.461436
RS04945	bifunctional_riboflavin_kinase/FMN_adenylyltransferase	1134.42	-0.458453	0.10461	-4.38248	1.17336e-05	3.34275e-05
RS04950	tRNA_pseudouridine(55)_synthase_TruB	1035.43	-0.4085	0.106595	-3.83226	0.00012697	0.000322543
RS04955	N-acetyltransferase	357.69	-0.339224	0.153255	-2.21346	0.0268663	0.0458454
RS04960	hypothetical_protein	683.782	-0.301127	0.0983636	-3.06137	0.00220327	0.00455794
RS04965	type_I_restriction_endonuclease_subunit_S	319.027	-0.143056	0.136985	-1.04432	0.296337	0.386618
RS04970	CPBP_family_intramembrane_metalloprotease	445.834	-0.77328	0.154993	-4.98913	6.06507e-07	1.9989e-06
RS04975	ABC_transporter_permease	501.367	-0.321571	0.13342	-2.41022	0.0159428	0.0288919
RS04980	ABC_transporter_ATP-binding_protein	223.823	-0.395362	0.178995	-2.20879	0.0271896	0.0463187
RS04985	DNA_topoisomerase_I	2456.82	-0.888552	0.0965647	-9.20162	3.52582e-20	2.71434e-19
RS04990	DNA_processing_protein_DprA	6.47056	0.211727	0.497155	0.425878	0.670196	0.743966
RS04995	ferrichrome_ABC_transporter_substrate-binding_protein	497.787	0.29815	0.114643	2.60068	0.00930405	0.0174246
RS05000	iron_ABC_transporter_ATP-binding_protein	215.165	0.12543	0.140612	0.892031	0.372376	0.470603
RS05005	hypothetical_protein	294.108	0.297177	0.135607	2.19145	0.028419	0.0481691
RS05010	iron_ABC_transporter_permease	305.299	0.384776	0.118605	3.24418	0.00117791	0.00257404
RS05015	galactoside_O-acetyltransferase	713.535	0.56483	0.0978	5.77535	7.67917e-09	3.00172e-08
RS05020	ribonuclease_HII	860.982	0.578584	0.0964383	5.99952	1.97896e-09	8.01519e-09
RS05025	ribosome_biogenesis_GTPase_YlqF	762.836	0.800317	0.0975461	8.2045	2.31556e-16	1.45498e-15
RS05030	cell_surface_protein	692.094	1.89471	0.0984039	19.2544	1.2957e-82	7.25952e-81
RS05035	hypothetical_protein	386.863	0.117791	0.121307	0.97101	0.331543	0.426209
RS05040	DNA-binding_response_regulator	182.009	-0.0239585	0.178234	-0.134422	0.893069	0.924017
RS05045	sensor_histidine_kinase	416.628	0.306361	0.111626	2.74453	0.00605972	0.0117977
RS05055	hypothetical_protein	135.691	0.450561	0.192742	2.33764	0.0194058	0.0342147
RS05060	hypothetical_protein	204.862	0.636734	0.133964	4.75303	2.00392e-06	6.16144e-06
RS05065	hypothetical_protein	77.3118	0.73373	0.211732	3.46537	0.000529508	0.00122339
RS05070	hypothetical_protein	87.9198	0.609492	0.196454	3.10246	0.0019192	0.00401558
RS05080	hypothetical_protein	108.665	0.818842	0.175738	4.65945	3.17058e-06	9.53065e-06
RS05085	hypothetical_protein	234.853	0.0670482	0.147882	0.45339	0.650268	0.726667
RS05090	hypothetical_protein	452.667	-0.0496266	0.119972	-0.413653	0.679128	0.7514
RS05095	type_VII_secretion_protein_EssC	1240.82	-0.759146	0.111906	-6.78381	1.17051e-11	5.67527e-11
RS05100	type_VII_secretion_protein_EssB	299.592	-1.21257	0.149629	-8.10381	5.32658e-16	3.31437e-15
RS05105	hypothetical_protein	49.383	-1.27767	0.269311	-4.74423	2.09301e-06	6.42557e-06
RS05110	type_VII_secretion_protein_EssA	102.138	-1.24298	0.197755	-6.28544	3.26935e-10	1.41205e-09
RS05115	ABC_transporter_permease	1067.18	-0.822512	0.154819	-5.31274	1.07989e-07	3.79468e-07
RS05120	hypothetical_protein	193.559	-0.655357	0.175203	-3.74056	0.00018361	0.000452739
RS05125	hypothetical_protein	90.2379	-0.790989	0.270079	-2.92873	0.00340346	0.00685109
RS05130	carbamoyl_phosphate_synthase_large_subunit	540.463	-2.53178	0.195826	-12.9287	3.09971e-38	5.21009e-37
RS05135	carbamoyl_phosphate_synthase_small_subunit	170.909	-2.84416	0.22573	-12.5998	2.11586e-36	3.33414e-35
RS05140	aspartate_carbamoyltransferase	111.611	-2.32835	0.287327	-8.10349	5.34046e-16	3.31437e-15
RS05145	dihydroorotase	537.067	-2.92911	0.221671	-13.2138	7.30406e-40	1.29231e-38
RS05150	orotate_phosphoribosyltransferase	193.332	-2.77646	0.23891	-11.6214	3.20873e-31	4.20261e-30
RS05155	orotidine-5'-phosphate_decarboxylase	175.371	-2.68048	0.285356	-9.39346	5.80613e-21	4.77999e-20
RS05160	membrane_protein	1021.19	-1.08409	0.113528	-9.54908	1.30856e-21	1.12794e-20
RS05165	ABC_transporter_ATP-binding_protein	1021.47	-0.977721	0.100931	-9.68704	3.42293e-22	3.02809e-21
RS05170	hypothetical_protein	2313.6	0.0831642	0.0898835	0.925245	0.354839	0.451552
RS05175	aspartate-semialdehyde_dehydrogenase	155.13	0.00608719	0.146515	0.0415466	0.96686	0.977731
RS05180	fibronectin-binding_protein	6.77018	0.734631	0.488541	1.50373	0.132652	0.192074
RS05185	cardiolipin_synthase	1139.31	-0.092703	0.0961351	-0.964299	0.334896	0.429971
RS05190	formate--tetrahydrofolate_ligase	1626.33	-0.755348	0.0998094	-7.56791	3.79289e-14	2.14293e-13
RS05195	lipoate--protein_ligase_A	766.841	-0.532312	0.149077	-3.57073	0.000355994	0.000843759
RS05200	deacetylase_SIR2	911.545	-0.714319	0.1616	-4.42028	9.85715e-06	2.84027e-05
RS05205	hypothetical_protein	990.321	-0.546357	0.153358	-3.56263	0.00036716	0.000869203
RS05210	glycine_cleavage_system_protein_H	744.907	-0.396749	0.123695	-3.20748	0.00133903	0.0028855
RS05215	LLM_class_flavin-dependent_oxidoreductase	1798.79	-0.695496	0.142365	-4.88532	1.03261e-06	3.29552e-06
RS05220	NADH-dependent_flavin_oxidoreductase	1815.03	-0.673682	0.123581	-5.45135	4.9988e-08	1.81668e-07
RS05225	hypothetical_protein	1001.73	-0.728158	0.128853	-5.6511	1.59429e-08	5.9994e-08
RS05230	phosphopantothenate--cysteine_ligase	270.919	0.306155	0.120847	2.5334	0.0112961	0.0209993
RS05235	phosphopantothenoylcysteine_decarboxylase	247.647	0.315288	0.187395	1.68248	0.0924761	0.140349
RS05240	membrane_protein	1977.37	0.21903	0.126887	1.72618	0.0843153	0.129622
RS05245	phosphoglucomutase	3856.62	-0.0915816	0.120595	-0.759416	0.447604	0.54485
RS05250	hypothetical_protein	205.375	0.0464678	0.174087	0.266922	0.789529	0.83703
RS05255	sugar_ABC_transporter_ATP-binding_protein	1086.27	-0.045063	0.101671	-0.443224	0.657604	0.733216
RS05260	multidrug_ABC_transporter_ATP-binding_protein	995.366	-0.0950947	0.129706	-0.733156	0.463463	0.559046
RS05265	hypothetical_protein	623.922	-0.265588	0.10122	-2.62387	0.00869378	0.0163576
RS05270	hypothetical_protein	1288.6	-0.120156	0.0974762	-1.23267	0.217698	0.294894
RS05275	serine_hydroxymethyltransferase	1471.64	-0.124806	0.0777536	-1.60515	0.108461	0.16169
RS05280	threonylcarbamoyl-AMP_synthase	756.466	-0.410405	0.135101	-3.03776	0.00238341	0.00490544
RS05285	protein-(glutamine-N5)_methyltransferase2C_release_factor-specific	825.951	-0.3371	0.0907574	-3.71429	0.000203771	0.000498281
RS05290	peptide_chain_release_factor_1	1167.59	-0.305823	0.0926833	-3.29965	0.00096804	0.00215274
RS05295	thymidine_kinase	523.983	-0.149535	0.108157	-1.38257	0.166797	0.23543
RS05300	tautomerase	1963.66	-0.471486	0.117432	-4.01498	5.94502e-05	0.000155931
RS05305	thiamine_biosynthesis_protein_ApbE	231.822	-0.461106	0.289617	-1.59212	0.111357	0.165762
RS05310	NAD(P)H-dependent_oxidoreductase	238.277	-0.721385	0.449039	-1.60651	0.108162	0.161363
RS05315	NAD(P)H-dependent_oxidoreductase	867.395	-1.0447	0.439257	-2.37833	0.0173911	0.0311526
RS05320	formate_transporter	420.672	-1.41828	0.213848	-6.63216	3.30805e-11	1.54095e-10
RS05325	xanthine_permease	779.054	-1.06622	0.163506	-6.52102	6.98325e-11	3.14402e-10
RS05330	xanthine_phosphoribosyltransferase	143.784	-0.925713	0.193103	-4.79389	1.63577e-06	5.09945e-06
RS05335	guanosine_monophosphate_reductase	434.769	-0.00401323	0.150707	-0.0266294	0.978755	0.983632
RS05340	MFS_transporter	382.815	0.238144	0.156342	1.52323	0.127702	0.186648
RS05345	hypothetical_protein	943.471	-0.363032	0.166429	-2.1813	0.0291613	0.0492203
RS05350	potassium_transporter_Kup	2095.91	0.182346	0.107037	1.70358	0.0884593	0.135168
RS05355	NAD(P)-dependent_oxidoreductase	328.033	0.985025	0.126856	7.76492	8.1699e-15	4.76263e-14
RS05365	phosphate_acetyltransferase	5864.13	-0.19869	0.105365	-1.88574	0.0593306	0.0940062
RS05370	23S_rRNA_pseudouridine_synthase	768.401	-0.160214	0.100711	-1.59083	0.111648	0.166072
RS05375	NAD(+)_kinase	626.605	-0.0372321	0.10179	-0.365775	0.714533	0.780299
RS05380	GTP_pyrophosphokinase	725.462	0.0029503	0.106409	0.0277259	0.977881	0.983534
RS05385	adenylate_cyclase	394.654	1.14094	0.12024	9.48883	2.33647e-21	1.97182e-20
RS05390	ribose-phosphate_pyrophosphokinase_2	2458.89	0.273405	0.0805524	3.39412	0.000688496	0.00156209
RS05395	cysteine_desulfurase	2196.31	0.0619229	0.0796323	0.77761	0.436799	0.535251
RS05400	cysteine_desulfurase	2083.1	-0.0615435	0.0818544	-0.751866	0.452132	0.549037
RS05405	transcriptional_regulator	3323.64	-0.895426	0.131112	-6.82945	8.52391e-12	4.18314e-11
RS05410	hypothetical_protein	5.87016	1.87987	0.544976	3.44945	0.000561739	0.00129341
RS05415	AI-2E_family_transporter	785.779	0.152355	0.129466	1.1768	0.239277	0.320253
RS05420	6-phospho-beta-glucosidase	363.313	0.983997	0.134353	7.32395	2.40781e-13	1.2848e-12
RS05425	hypothetical_protein	785.787	0.0598446	0.137061	0.436627	0.662382	0.736913
RS05430	hydrolase	441.879	0.815561	0.111298	7.32772	2.34093e-13	1.25243e-12
RS05435	AraC_family_transcriptional_regulator	213.175	-0.0656303	0.159336	-0.411899	0.680413	0.752409
RS05440	ribonuclease_HII	624.153	-0.614718	0.102562	-5.99364	2.05192e-09	8.29404e-09
RS05445	spermidine/putrescine_ABC_transporter_substrate-binding_protein	928.006	-1.20273	0.084936	-14.1604	1.61084e-45	3.42006e-44
RS05450	spermidine/purescine_ABC_transporter_permease	619.353	-0.934704	0.11882	-7.86656	3.64531e-15	2.16891e-14
RS05455	spermidine/putrescine_ABC_transporter_permease	484.759	-0.946519	0.102352	-9.24767	2.29441e-20	1.80775e-19
RS05460	spermidine/putrescine_import_ATP-binding_protein_PotA	709.389	-0.827763	0.0995415	-8.31576	9.11683e-17	5.80084e-16
RS05465	UDP-N-acetylenolpyruvoylglucosamine_reductase	478.925	-0.729705	0.139822	-5.2188	1.80083e-07	6.17734e-07
RS05470	2-amino-4-hydroxy-6-hydroxymethyldihydropteridine_diphosphokinase	641.13	0.062381	0.098721	0.631892	0.527458	0.618177
RS05475	dihydroneopterin_aldolase	317.082	0.158782	0.111786	1.42042	0.155486	0.221237
RS05480	dihydropteroate_synthase	404.977	0.199578	0.104477	1.91025	0.0561011	0.0896639
RS05485	GTP_cyclohydrolase_I_FolE	439.185	0.169726	0.118834	1.42826	0.153217	0.218712
RS05490	dihydrofolate_synthase	1328.99	0.196928	0.0863246	2.28125	0.0225339	0.0391817
RS05495	protein_RarD	681.443	0.180645	0.0972976	1.85663	0.0633644	0.0998485
RS05500	homoserine_kinase	845.047	0.336878	0.0900526	3.74091	0.000183356	0.000452668
RS05505	homoserine_dehydrogenase	641.75	0.15286	0.118548	1.28944	0.197246	0.272122
RS05510	deacetylase	541.387	1.48658	0.137179	10.8369	2.30258e-27	2.59458e-26
RS05515	choline_transporter	3452.98	1.31437	0.116297	11.3019	1.28439e-29	1.57965e-28
RS05520	succinate-semialdehyde_dehydrogenase	5207	0.0819256	0.0837463	0.97826	0.327946	0.422123
RS05525	membrane_protein	588.801	0.302393	0.095957	3.15134	0.00162525	0.00345794
RS05530	hypothetical_protein	1490.36	0.987193	0.136847	7.21384	5.43965e-13	2.87973e-12
RS05535	kinase	233.622	-0.764379	0.175332	-4.35962	1.30291e-05	3.6858e-05
RS05540	transcriptional_regulator	46.1527	0.345655	0.263778	1.3104	0.190059	0.263652
RS05545	hypothetical_protein	108.039	0.126339	0.173853	0.7267	0.46741	0.562845
RS05550	2-Cys_peroxiredoxin	2563.47	-0.126098	0.18319	-0.688346	0.491235	0.582493
RS05555	hypothetical_protein	275.48	-0.760613	0.155423	-4.89382	9.88983e-07	3.1613e-06
RS05560	hypothetical_protein	883.24	-0.684839	0.110918	-6.17429	6.64615e-10	2.78118e-09
RS05565	GntR_family_transcriptional_regulator	1574.49	-0.521357	0.120957	-4.31027	1.63055e-05	4.55514e-05
RS05570	Asp23/Gls24_family_envelope_stress_response_protein	2342.94	0.561928	0.2045	2.74781	0.00599947	0.0116917
RS05575	CsbD_family_protein	751.108	0.490765	0.237852	2.06332	0.0390818	0.064243
RS05580	Asp23/Gls24_family_envelope_stress_response_protein	2032.39	0.536873	0.211225	2.54172	0.011031	0.0205443
RS05585	membrane_protein	976.657	0.249264	0.245445	1.01556	0.30984	0.401895
RS05590	hypothetical_protein	1960.79	0.204107	0.18809	1.08515	0.277854	0.36534
RS05595	GlsB/YeaQ/YmgE_family_stress_response_membrane_protein	859.116	0.348202	0.13159	2.64612	0.00814207	0.0154588
RS05600	GlsB/YeaQ/YmgE_family_stress_response_membrane_protein	1348	0.663954	0.140353	4.7306	2.23855e-06	6.82048e-06
RS05605	DNA_helicase_PcrA	1104.29	0.152152	0.0837833	1.81601	0.0693682	0.108629
RS05610	thioesterase	1016.77	-0.470284	0.126788	-3.70921	0.000207909	0.00050769
RS05615	uracil_permease	1461.49	-3.13835	0.193235	-16.2411	2.58153e-59	7.77156e-58
RS05620	sodium_alanine_symporter_family_protein	269.629	-1.11981	0.14299	-7.83134	4.82709e-15	2.8636e-14
RS05625	cation_transporter	1980.3	0.365569	0.0873016	4.18743	2.82136e-05	7.64877e-05
RS05630	murein_hydrolase_regulator_LrgA	197.104	-0.558848	0.149247	-3.74444	0.000180794	0.000447987
RS05635	membrane_protein	226.244	-0.375644	0.138792	-2.70653	0.00679907	0.0130981
RS05640	hypothetical_protein	966.401	0.813567	0.131014	6.20976	5.3064e-10	2.24853e-09
RS05650	30S_ribosomal_protein_S1	19367.9	-0.914548	0.0861589	-10.6147	2.54695e-26	2.71809e-25
RS05665	hypothetical_protein	406.655	0.163962	0.106944	1.53316	0.125236	0.18371
RS05670	branched_chain_amino_acid_aminotransferase	1572.37	-0.96377	0.110331	-8.73524	2.43135e-18	1.72677e-17
RS05675	DNA_topoisomerase_IV_subunit_A	2414.69	-0.32189	0.0673185	-4.78159	1.73912e-06	5.39662e-06
RS05680	DNA_topoisomerase_IV_subunit_B	1902.2	-0.282236	0.0881083	-3.20329	0.00135869	0.00292162
RS05685	glycerol-3-phosphate_acyltransferase	551.11	-0.634562	0.174925	-3.62763	0.000286036	0.000685195
RS05690	uracil-DNA_glycosylase	673.498	0.464168	0.1416	3.27803	0.00104536	0.00231703
RS05695	hypothetical_protein	1910.54	-0.545685	0.124672	-4.37697	1.2034e-05	3.42348e-05
RS05700	N-acylneuraminate_cytidylyltransferase	1857.82	-1.53068	0.10676	-14.3376	1.27379e-46	2.79265e-45
RS05705	neuD_protein	827.901	-1.36928	0.0948977	-14.4291	3.39694e-47	7.61293e-46
RS05710	UDP-N-acetylglucosamine_2-epimerase_(hydrolyzing)	1879.33	-1.25325	0.0942656	-13.2948	2.48007e-40	4.46635e-39
RS05715	N-acetylneuraminate_synthase	1744.98	-1.3126	0.113277	-11.5876	4.76555e-31	6.12236e-30
RS05720	phage_capsid_assembly_protein	2441.71	-1.42352	0.0987761	-14.4116	4.37526e-47	9.69769e-46
RS05725	capsular_polysaccharide_biosynthesis_protein	1650.83	-1.4799	0.0812497	-18.2142	3.98317e-74	1.5753e-72
RS05730	hypothetical_protein	1588.34	-1.58271	0.0791635	-19.993	6.34184e-89	5.11659e-87
RS05735	hypothetical_protein	1770	-1.50631	0.0823443	-18.2929	9.42948e-75	3.88148e-73
RS05740	capsule_biosynthesis_protein_CapK	1800.94	-1.44906	0.0957112	-15.1399	8.83733e-52	2.17377e-50
RS05745	multidrug_MFS_transporter	637.993	-1.33177	0.096331	-13.8249	1.80301e-43	3.6734e-42
RS05750	UDP-N-acetylglucosamine--LPS_N-acetylglucosamine_transferase	721.034	-1.06383	0.0941517	-11.2991	1.32579e-29	1.62068e-28
RS05755	galactosyl_transferase	3162.53	-0.91276	0.0697999	-13.0768	4.46742e-39	7.70153e-38
RS05760	tyrosine-protein_kinase_CpsD	1788.87	-0.753836	0.0763267	-9.87643	5.26776e-23	4.87388e-22
RS05765	capsular_polysaccharide_biosynthesis_protein_CpsC	1718.39	-0.811261	0.0964312	-8.41285	4.00173e-17	2.59533e-16
RS05770	hypothetical_protein	1242.13	-0.895361	0.100507	-8.90846	5.17474e-19	3.80929e-18
RS05775	LytR_family_transcriptional_regulator	3717.95	-0.611484	0.0854179	-7.15874	8.14247e-13	4.26581e-12
RS05780	LysR_family_transcriptional_regulator	268.606	-0.499427	0.147748	-3.38026	0.000724168	0.00163566
RS05795	hypothetical_protein	2159.71	-0.0270576	0.116715	-0.231826	0.816673	0.858827
RS05800	purine-nucleoside_phosphorylase	1429.38	0.0465863	0.0834299	0.558388	0.57658	0.659649
RS05805	hypothetical_protein	2102.06	0.06159	0.0785272	0.784314	0.432856	0.532685
RS05810	purine-nucleoside_phosphorylase	1401.48	0.246893	0.0909821	2.71364	0.00665476	0.0128446
RS05815	arsenate_reductase_(glutaredoxin)	962.117	0.0689048	0.0861092	0.800203	0.423593	0.522881
RS05820	phosphopentomutase	1479.22	0.109824	0.0851972	1.28905	0.19738	0.272122
RS05825	ribose-5-phosphate_isomerase	956.852	0.256602	0.0792072	3.23962	0.00119688	0.00260421
RS05830	Zn-dependent_protease	1596.91	1.09037	0.109089	9.99526	1.59865e-23	1.52098e-22
RS05835	transcriptional_regulator	503.009	0.376844	0.104354	3.61122	0.000304765	0.000728331
RS05840	ribonuclease_J	2990.76	-0.529103	0.0849528	-6.2282	4.71817e-10	2.01196e-09
RS05845	phosphonate_ABC_transporter_ATP-binding_protein	350.461	-1.11053	0.142174	-7.81109	5.66956e-15	3.34372e-14
RS05850	branched-chain_amino_acid_ABC_transporter_permease	197.335	-1.25065	0.202878	-6.16457	7.06746e-10	2.95136e-09
RS05855	peptide_ABC_transporter_substrate-binding_protein	130.592	-1.16661	0.220003	-5.3027	1.141e-07	3.98167e-07
RS05860	hypothetical_protein	906.232	-0.15922	0.105866	-1.50397	0.132589	0.192074
RS05865	alpha-acetolactate_decarboxylase	6102.69	-0.0148066	0.231658	-0.063916	0.949037	0.964822
RS05870	acetolactate_synthase_AlsS	7411.68	0.0699649	0.203581	0.343672	0.731093	0.792302
RS05875	hypothetical_protein	1076.57	1.06209	0.0904871	11.7375	8.18539e-32	1.09337e-30
RS05880	AI-2E_family_transporter	1116.32	1.01734	0.0838502	12.1328	7.07573e-34	1.03418e-32
RS05885	hypothetical_protein	420.585	0.96222	0.103468	9.29968	1.40867e-20	1.11862e-19
RS05890	72C8-dihydro-8-oxoguanine_triphosphatase	345.538	1.12168	0.118707	9.44914	3.41641e-21	2.85929e-20
RS05895	hyaluronate_lyase	759.385	-0.930145	0.0950983	-9.78088	1.36027e-22	1.23588e-21
RS05900	dTDP-glucose_42C6-dehydratase	3241.25	0.292088	0.070716	4.13043	3.62082e-05	9.7117e-05
RS05905	dTDP-4-dehydrorhamnose_32C5-epimerase	1396.65	0.396934	0.0814378	4.87408	1.09319e-06	3.46148e-06
RS05910	glucose-1-phosphate_thymidylyltransferase	1970.04	0.505111	0.0779011	6.484	8.93214e-11	3.97707e-10
RS05915	FAD-dependent_oxidoreductase	448.696	-0.037305	0.117921	-0.316357	0.751732	0.805479
RS05920	Nif3-like_dinuclear_metal_center_hexameric_protein	456.413	0.145944	0.102543	1.42325	0.154665	0.22031
RS05925	SAM-dependent_methyltransferase	500.961	-0.154814	0.109487	-1.41399	0.157365	0.223525
RS05930	DNA_replication_protein_DnaD	760.111	-0.8741	0.110409	-7.91691	2.43478e-15	1.45726e-14
RS05935	adenine_phosphoribosyltransferase	2088.14	-0.49738	0.0852191	-5.83648	5.33147e-09	2.10854e-08
RS05940	hypothetical_protein	257.733	-0.670452	0.141687	-4.73193	2.22392e-06	6.79642e-06
RS05945	single-stranded-DNA-specific_exonuclease_RecJ	1136.14	-1.26781	0.103937	-12.1978	3.19248e-34	4.8054e-33
RS05950	short-chain_dehydrogenase	614.788	-0.318551	0.107573	-2.96126	0.00306379	0.00622951
RS05955	ribonuclease_Z	728.203	-0.2737	0.0881953	-3.10333	0.00191354	0.0040079
RS05960	hypothetical_protein	533.349	-0.209288	0.0984123	-2.12664	0.0334501	0.0557133
RS05965	GTPase_HflX	751.63	-0.130344	0.0986467	-1.32132	0.186394	0.2591
RS05970	tRNA_(adenosine(37)-N6)-dimethylallyltransferase_MiaA	202.203	-0.254091	0.140663	-1.80638	0.0708591	0.110531
RS05975	DUF3042_domain-containing_protein	13022.3	2.22335	0.216849	10.253	1.14749e-24	1.13456e-23
RS05980	ethanolamine_utilization_protein_EutK	50.4918	-1.75189	0.257225	-6.81074	9.70959e-12	4.73049e-11
RS05985	pullulanase	44.1007	0.359975	0.250584	1.43654	0.150848	0.215481
RS05990	hypothetical_protein	738.488	1.43324	0.117944	12.1519	5.6061e-34	8.31434e-33
RS05995	uracil-DNA_glycosylase	571.632	1.36405	0.120768	11.2948	1.39272e-29	1.69224e-28
RS06000	dipeptidase_PepV	4143.18	1.28709	0.0924523	13.9216	4.68074e-44	9.73303e-43
RS06005	NAD(P)H_nitroreductase	1322.29	1.2872	0.0965668	13.3297	1.55576e-40	2.827e-39
RS06010	glycerophosphoryl_diester_phosphodiesterase	719.244	-0.219204	0.121488	-1.80432	0.0711804	0.110695
RS06025	excinuclease_ABC_subunit_C	1033.51	0.234536	0.080053	2.92977	0.00339218	0.00683519
RS06030	hypothetical_protein	248.943	-0.251777	0.161607	-1.55796	0.119243	0.1762
RS06035	MATE_family_efflux_transporter	1191.82	-0.233402	0.0989479	-2.35884	0.0183322	0.032571
RS06040	VOC_family_protein	3349.54	0.218018	0.125894	1.73176	0.083316	0.128281
RS06045	hypothetical_protein	2589.25	0.148964	0.0867531	1.7171	0.0859609	0.13175
RS06050	Lj965_prophage_superinfection_immunity_protein	660.655	1.06742	0.102306	10.4335	1.74284e-25	1.80272e-24
RS06060	IS3_family_transposase	57.9822	0.329323	0.235612	1.39773	0.162193	0.230059
RS06075	histidine_triad_(HIT)_protein	188.526	-1.97815	0.170363	-11.6113	3.60924e-31	4.69667e-30
RS06080	adhesion_protein	50.0759	-1.73947	0.259824	-6.69479	2.15974e-11	1.02019e-10
RS06090	group_II_intron_reverse_transcriptase/maturase	11.4193	-0.509409	0.450051	-1.13189	0.25768	0.34261
RS06095	peptidase_C5	1279.37	-0.862417	0.0981912	-8.78304	1.59121e-18	1.13811e-17
RS06100	hypothetical_protein	15.7459	-0.569028	0.369507	-1.53996	0.123569	0.181794
RS06105	hypothetical_protein	182.644	-0.307863	0.19678	-1.56451	0.117699	0.174173
RS06110	hypothetical_protein	80.6346	-1.17112	0.533135	-2.19666	0.0280445	0.0475742
RS06130	hypothetical_protein	190.049	0.458389	0.146597	3.12686	0.00176686	0.0037356
RS06135	site-specific_integrase	655.912	0.206094	0.100924	2.04207	0.0411449	0.0670892
RS06140	hypothetical_protein	40.5734	0.27942	0.255346	1.09428	0.273832	0.360993
RS06145	hypothetical_protein	13.5703	-0.463024	0.420134	-1.10209	0.270424	0.356966
RS06150	cell_division_protein_FtsK	22.7675	-1.02769	0.459139	-2.2383	0.0252015	0.0433346
RS06155	hypothetical_protein	3.2693	-1.30836	0.574262	-2.27834	0.0227065	0.039448
RS06160	hypothetical_protein	239.394	0.278985	0.131256	2.1255	0.0335448	0.055825
RS06165	serine/threonine_protein_kinase	1757.03	-0.518381	0.0850393	-6.09579	1.089e-09	4.51956e-09
RS06170	type_II_restriction_endonuclease_Eco47II	971.859	-0.52924	0.0851657	-6.21423	5.15757e-10	2.19007e-09
RS06175	DNA_(cytosine-5-)-methyltransferase	1064.64	-0.602445	0.126376	-4.76707	1.86925e-06	5.78262e-06
RS06180	50S_ribosomal_protein_L7/L12	14983.7	-1.38243	0.134926	-10.2459	1.23513e-24	1.21525e-23
RS06185	50S_ribosomal_protein_L10	8086.24	-1.59933	0.0849367	-18.8297	4.31452e-79	2.12253e-77
RS06190	ATP-dependent_Clp_protease_ATP-binding_subunit	957.706	0.867263	0.132852	6.52803	6.66404e-11	3.01376e-10
RS06195	homocysteine_S-methyltransferase	171.795	-0.298535	0.152723	-1.95474	0.0506133	0.0814741
RS06200	amino_acid_transporter	231.188	-0.247725	0.153292	-1.61603	0.106087	0.158737
RS06205	HXXEE_domain-containing_protein	52.1339	0.112686	0.256596	0.439158	0.660547	0.735684
RS06215	TetR_family_transcriptional_regulator	88.4967	-0.25242	0.208078	-1.21311	0.22509	0.30348
RS06220	GTP-binding_protein	1772.06	0.755453	0.112132	6.73719	1.61481e-11	7.69995e-11
RS06225	ATP-dependent_Clp_protease_ATP-binding_subunit_ClpX	2172.23	0.944709	0.0767439	12.3099	8.01384e-35	1.22454e-33
RS06230	hypothetical_protein	359.414	1.024	0.11461	8.93463	4.0856e-19	3.02965e-18
RS06235	dihydrofolate_reductase	1326.52	1.33913	0.0969865	13.8074	2.30025e-43	4.6396e-42
RS06240	thymidylate_synthase	1247.47	0.916122	0.0913195	10.0321	1.10196e-23	1.06347e-22
RS06245	hydroxymethylglutaryl-CoA_synthase	1134.55	0.470286	0.117392	4.00612	6.17239e-05	0.000161685
RS06250	hydroxymethylglutaryl-CoA_reductase2C_degradative	1231.81	0.0895164	0.105852	0.845677	0.397733	0.496428
RS06255	hypothetical_protein	1463	4.39474	0.132793	33.0947	3.53711e-240	3.56717e-237
RS06260	hemolysin_III	2030.24	4.53641	0.163457	27.7529	1.60922e-169	4.05724e-167
RS06265	diacylglycerol_kinase	3682.56	2.55856	0.0912098	28.0514	3.8424e-173	1.10716e-170
RS06270	hypothetical_protein	2485.45	0.267915	0.105827	2.53163	0.0113533	0.0210863
RS06275	DUF4649_domain-containing_protein	524.763	-0.564415	0.139271	-4.05263	5.06454e-05	0.000133532
RS06280	type_2_isopentenyl-diphosphate_Delta-isomerase	959.923	-0.433207	0.0948676	-4.56644	4.96083e-06	1.46073e-05
RS06285	phosphomevalonate_kinase	810.727	-0.559839	0.0962507	-5.81647	6.01045e-09	2.36779e-08
RS06290	diphosphomevalonate_decarboxylase	684.68	-0.485436	0.0994151	-4.88292	1.04527e-06	3.33066e-06
RS06295	mevalonate_kinase	676.969	-0.29376	0.0908873	-3.23213	0.00122871	0.00266484
RS06300	two-component_sensor_histidine_kinase	699.371	0.0729714	0.134874	0.541032	0.588485	0.670454
RS06305	DNA-binding_response_regulator	330.756	0.279838	0.138568	2.01951	0.0434347	0.0704514
RS06310	GTP_pyrophosphokinase	344.989	0.523446	0.139851	3.74289	0.000181919	0.000450222
RS06315	ABC_transporter	633.669	-1.75757	0.139567	-12.593	2.30625e-36	3.60597e-35
RS06320	ABC_transporter	582.88	-1.78304	0.129748	-13.7423	5.66123e-43	1.11948e-41
RS06325	MarR_family_transcriptional_regulator	175.965	-1.75882	0.188258	-9.34258	9.4016e-21	7.67734e-20
RS06330	bifunctional_metallophosphatase/5'-nucleotidase	298.403	-2.0864	0.208419	-10.0106	1.36961e-23	1.30924e-22
RS06335	peptide_deformylase	1703.7	0.00148967	0.171442	0.00868907	0.993067	0.995041
RS06340	glutamate_dehydrogenase	1471.75	0.135193	0.152068	0.88903	0.373987	0.472333
RS06345	membrane_protein	5777.71	0.692932	0.111191	6.2319	4.6082e-10	1.96922e-09
RS06350	multidrug_ABC_transporter_ATP-binding_protein	1048.43	-0.125825	0.105874	-1.18845	0.234657	0.315957
RS06355	multidrug_ABC_transporter_ATP-binding_protein	857.172	-0.030576	0.0927175	-0.329776	0.741569	0.798849
RS06365	antibiotic_ABC_transporter_ATP-binding_protein	1024.67	-0.272807	0.0839649	-3.24906	0.00115788	0.00254381
RS06370	CCA_tRNA_nucleotidyltransferase	599.784	-0.328225	0.101744	-3.22599	0.00125539	0.00271354
RS06375	hypothetical_protein	1748.55	-0.190763	0.0945358	-2.01789	0.0436023	0.0706392
RS06380	transposase	706.15	-0.0804383	0.0930099	-0.864836	0.387129	0.486461
RS06385	hypothetical_protein	169.266	0.770845	0.150329	5.12772	2.93278e-07	9.89948e-07
RS06390	hypothetical_protein	611.497	1.14214	0.104738	10.9048	1.09341e-27	1.25307e-26
RS06395	PTS_fructose_transporter_subunit_IIC	1070.85	1.31631	0.553889	2.37649	0.0174783	0.0312534
RS06400	1-phosphofructokinase	301.965	1.69979	0.506974	3.35281	0.000799947	0.00180077
RS06405	DeoR_family_transcriptional_regulator	244.868	1.38839	0.5087	2.72929	0.00634718	0.0123277
RS06410	peptidoglycan_branched_peptide_synthesis_protein	2173.67	2.16208	0.078236	27.6354	4.17933e-168	9.36633e-166
RS06415	hypothetical_protein	7230.83	1.76835	0.114992	15.378	2.30016e-53	6.02522e-52
RS06420	2-dehydropantoate_2-reductase	1787.26	-0.342539	0.111473	-3.07285	0.00212023	0.00439517
RS06425	membrane_protein	1477.49	-0.199258	0.114927	-1.73378	0.082958	0.127925
RS06430	ferredoxin--NADP(+)_reductase	361.26	-0.417564	0.113848	-3.66772	0.000244724	0.00059044
RS06435	tRNA_(guanosine(37)-N1)-methyltransferase_TrmD	248.056	-0.222077	0.136786	-1.62354	0.104475	0.156638
RS06440	ribosome_maturation_factor_RimM	84.4461	-0.00561842	0.230553	-0.0243693	0.980558	0.983973
RS06455	transcriptional_regulator	1156.98	0.743907	0.0783126	9.4992	2.11506e-21	1.79247e-20
RS06460	RNA-binding_protein	5148.61	-1.1892	0.122132	-9.73701	2.09624e-22	1.87916e-21
RS06465	30S_ribosomal_protein_S16	4659.77	-1.23684	0.0947942	-13.0476	6.55473e-39	1.12041e-37
RS06470	permease	2926.65	-0.590281	0.0977957	-6.03586	1.58121e-09	6.45609e-09
RS06475	macrolide_ABC_transporter_ATP-binding_protein	1391.88	-0.461487	0.0814244	-5.66768	1.44746e-08	5.47755e-08
RS06480	ABC_transporter_substrate-binding_protein	3879.71	-0.535205	0.0717514	-7.45915	8.70803e-14	4.78586e-13
RS06485	carbamoyl_phosphate_synthase_large_subunit	964.143	-0.649893	0.112053	-5.79989	6.63597e-09	2.60404e-08
RS06490	carbamoyl_phosphate_synthase_small_subunit	581.502	-0.458629	0.101136	-4.53478	5.76647e-06	1.69055e-05
RS06495	bifunctional_pyrimidine_operon_transcriptional_regulator/uracil_phosphoribosyltransferase	309.351	-0.521309	0.116478	-4.47558	7.62029e-06	2.20835e-05
RS06500	RNA_pseudouridine_synthase	797.824	0.066478	0.0940563	0.70679	0.479697	0.573532
RS06505	signal_peptidase_II	302.437	0.0984447	0.112617	0.874155	0.382034	0.481301
RS06510	LysR_family_transcriptional_regulator	679.581	0.138125	0.11202	1.23305	0.217559	0.294894
RS06515	50S_ribosomal_protein_L27	5329.07	-1.01543	0.0663658	-15.3005	7.58837e-53	1.8896e-51
RS06520	hypothetical_protein	2675.39	-1.07607	0.0782036	-13.7599	4.44431e-43	8.87541e-42
RS06525	50S_ribosomal_protein_L21	3841.64	-1.1679	0.0795308	-14.6849	8.05903e-49	1.84717e-47
RS06530	metallophosphatase	1420	0.499495	0.0923715	5.40746	6.39232e-08	2.28605e-07
RS06535	tRNA_4-thiouridine(8)_synthase_ThiI	1379.32	-0.413056	0.10851	-3.8066	0.000140889	0.000355217
RS06540	aminotransferase_V	1097.92	-0.131368	0.0762725	-1.72236	0.0850052	0.130484
RS06545	hypothetical_protein	2231.24	1.64835	0.116053	14.2034	8.72214e-46	1.89167e-44
RS06550	glutathione-disulfide_reductase	2237.32	0.596842	0.133295	4.47759	7.54906e-06	2.19086e-05
RS06555	glycosyl_transferase_family_8	488.818	0.573295	0.135102	4.24344	2.20119e-05	6.04053e-05
RS06560	hypothetical_protein	246.22	0.308423	0.1401	2.20145	0.0277039	0.0471551
RS06565	accessory_Sec_system_glycosyltransferase_GtfB	377.471	0.343098	0.18126	1.89285	0.0583777	0.0926418
RS06570	accessory_Sec_system_glycosyltransferase_GtfA	345.292	0.457957	0.179669	2.54889	0.0108065	0.0201635
RS06575	accessory_Sec_system_translocase_SecA2	720.344	0.419074	0.20068	2.08827	0.0367734	0.0606972
RS06580	accessory_Sec_system_protein_Asp3	170.636	0.636929	0.151896	4.19318	2.75067e-05	7.46717e-05
RS06585	accessory_Sec_system_protein_Asp2	412.715	0.633827	0.122817	5.16073	2.45989e-07	8.40948e-07
RS06590	accessory_Sec_system_protein_Asp1	499.763	0.987279	0.105712	9.33933	9.69491e-21	7.88493e-20
RS06595	accessory_Sec_system_protein_translocase_subunit_SecY2	276.351	1.25926	0.166962	7.54218	4.62169e-14	2.59664e-13
RS06600	cell_wall_anchor	2993.48	1.00327	0.107691	9.31619	1.20594e-20	9.61413e-20
RS06605	hypothetical_protein	3562.68	0.407808	0.0927136	4.39858	1.08963e-05	3.11742e-05
RS06610	chorismate_synthase	432.192	-0.181045	0.107227	-1.68843	0.0913286	0.139131
RS06615	3-dehydroquinate_synthase	403.082	-0.0356187	0.107626	-0.330949	0.740683	0.79848
RS06620	3-dehydroquinase	1503.37	-0.71161	0.100327	-7.09292	1.31312e-12	6.71399e-12
RS06625	SAM-dependent_methyltransferase	1642.47	-0.51903	0.0869639	-5.96833	2.39692e-09	9.64986e-09
RS06630	alkaline_phosphatase	5871.81	0.559326	0.0741838	7.53973	4.70928e-14	2.63851e-13
RS06635	50S_ribosomal_protein_L20	10166.5	-1.51531	0.0828449	-18.291	9.76531e-75	3.93933e-73
RS06640	50S_ribosomal_protein_L35	2027.04	-1.38532	0.0880478	-15.7337	8.8887e-56	2.49007e-54
RS06645	translation_initiation_factor_IF-3	3328.54	-1.39716	0.0864158	-16.1678	8.5031e-59	2.48562e-57
RS06650	cytidylate_kinase	1643.07	-0.644642	0.0984827	-6.54574	5.92023e-11	2.68339e-10
RS06655	membrane_protein	1031.75	-0.219283	0.0844005	-2.59813	0.00937339	0.0175381
RS06660	ferredoxin	98.1147	-0.319091	0.197994	-1.61162	0.107046	0.160053
RS06665	hypothetical_protein	789.121	0.00815191	0.0954861	0.0853727	0.931965	0.953232
RS06670	peptidase_T	2121.77	-0.154984	0.0846251	-1.83142	0.0670373	0.105307
RS06675	polysaccharide_biosynthesis_protein	1267.67	0.916423	0.0994854	9.21164	3.21193e-20	2.48217e-19
RS06680	UDP-N-acetylmuramoylalanyl-D-glutamate--22C_6-diaminopimelate_ligase	1663.53	0.404651	0.0823196	4.91561	8.85051e-07	2.85087e-06
RS06685	iron_ABC_transporter_ATP-binding_protein	223.688	-0.823716	0.150505	-5.47303	4.42415e-08	1.61365e-07
RS06690	ferrichrome_ABC_transporter_substrate-binding_protein	422.492	-0.882833	0.153201	-5.76258	8.28375e-09	3.21933e-08
RS06695	ferrichrome_ABC_transporter_permease	191.877	-0.751795	0.154021	-4.88114	1.05477e-06	3.35562e-06
RS06700	ferrichrome_ABC_transporter_permease	165.368	-0.699893	0.144554	-4.84174	1.2871e-06	4.06272e-06
RS06705	hypothetical_protein	407.709	-0.279272	0.107341	-2.60173	0.0092755	0.0173872
RS06710	manganese-dependent_inorganic_pyrophosphatase	4372.73	-0.139162	0.100387	-1.38626	0.165669	0.23433
RS06715	pyruvate_formate_lyase-activating_protein	647.963	-0.0421396	0.104473	-0.403352	0.686689	0.757273
RS06720	hypothetical_protein	2266.84	-0.456575	0.116235	-3.92804	8.56393e-05	0.000220606
RS06725	transposase	47.7472	0.334629	0.256631	1.30393	0.192257	0.265969
RS06730	SAM-dependent_methyltransferase	344.836	-0.146813	0.130955	-1.1211	0.262247	0.348092
RS06735	TIGR01212_family_radical_SAM_protein	413.681	-0.0713194	0.11879	-0.600384	0.548251	0.6348
RS06740	phosphatase_PAP2_family_protein	1167.86	-0.437694	0.13208	-3.31385	0.000920215	0.00205773
RS06745	membrane_protein	900.822	-0.441426	0.107492	-4.10658	4.01553e-05	0.000106992
RS06750	sortase	274.792	0.573619	0.244876	2.34249	0.0191555	0.0338325
RS06755	hypothetical_protein	263.016	0.688659	0.298088	2.31025	0.0208741	0.0365161
RS06760	class_C_sortase	382.515	0.632936	0.409188	1.54681	0.121909	0.179614
RS06765	hypothetical_protein	856.46	0.583651	0.430487	1.35579	0.175165	0.246037
RS06770	hypothetical_protein	2192.02	0.69526	0.231172	3.00754	0.00263375	0.00539864
RS06775	signal_peptidase_I	183.146	0.805717	0.143776	5.60397	2.09497e-08	7.81065e-08
RS06780	hypothetical_protein	121.36	0.868274	0.197384	4.39892	1.08792e-05	3.11695e-05
RS06785	glycosyl_transferase	1905.94	-0.110952	0.0847146	-1.30972	0.190291	0.263791
RS06790	glycosyl_transferase_family_2	1049.5	-0.191991	0.0825917	-2.32458	0.0200943	0.0352743
RS06795	polysaccharide_biosynthesis_protein	1949.3	-0.0707848	0.0726886	-0.973809	0.330151	0.424691
RS06800	membrane_protein	1516.28	0.0611648	0.0788048	0.776156	0.437657	0.535977
RS06805	glycosyl_transferase_family_2	1294.88	0.0591416	0.0855297	0.691475	0.489267	0.581185
RS06810	glycosyl_transferase_family_2	1728.65	0.170127	0.0699683	2.43148	0.0150371	0.0274229
RS06815	nucleotide_sugar_dehydratase	1802.71	0.320037	0.0787028	4.06641	4.77433e-05	0.00012621
RS06820	2-C-methyl-D-erythritol_4-phosphate_cytidylyltransferase	1236.72	0.38458	0.0834698	4.60742	4.07706e-06	1.21111e-05
RS06825	LicD_family_protein	851.663	0.288533	0.0894196	3.22673	0.00125214	0.00271274
RS06830	hypothetical_protein	1742.1	-0.00134722	0.0752873	-0.0178944	0.985723	0.988664
RS06835	hypothetical_protein	420.526	0.12107	0.10832	1.1177	0.263694	0.34915
RS06840	glycosyl_transferase_family_2	651.375	0.0225406	0.0957992	0.23529	0.813983	0.857339
RS06845	alpha-L-Rha_alpha-12C3-L-rhamnosyltransferase	906.781	0.0101954	0.0964632	0.105692	0.915827	0.940541
RS06850	rhamnosyltransferase	916.988	0.300249	0.0879861	3.41246	0.000643804	0.00147228
RS06855	NAD(P)-dependent_oxidoreductase	1887.97	0.40824	0.110992	3.6781	0.000234976	0.00057102
RS06860	aromatic_ring_hydroxylase	1162.02	0.0133014	0.099949	0.133082	0.894129	0.924017
RS06865	RNA_polymerase_sigma_factor_RpoD	1442.1	-0.232165	0.0761632	-3.04825	0.00230176	0.00475195
RS06870	DNA_primase	2050.09	-0.280988	0.0687613	-4.08642	4.38083e-05	0.000116265
RS06875	large-conductance_mechanosensitive_channel	6516.05	0.260124	0.135588	1.91848	0.0550496	0.0880532
RS06880	IS3_family_transposase	118.847	0.0101754	0.163635	0.0621834	0.950417	0.965738
RS06890	30S_ribosomal_protein_S21	7504.42	-1.31266	0.115659	-11.3495	7.46115e-30	9.28959e-29
RS06895	Fe-S_oxidoreductase	85.9412	-0.716672	0.215119	-3.33151	0.000863752	0.00193792
RS06900	amino_acid_ABC_transporter_substrate-binding_protein	95.7092	-0.258034	0.206693	-1.24839	0.211888	0.288964
RS06905	ammonium_transporter	63.4673	-0.461571	0.25557	-1.80605	0.0709106	0.110531
RS06910	pyridine_nucleotide-disulfide_oxidoreductase	103.057	-0.308435	0.190656	-1.61776	0.105715	0.158298
RS06915	sulfurtransferase	6695.82	-0.495945	0.224217	-2.21189	0.0269742	0.0459906
RS06920	hypothetical_protein	1424.86	0.660657	0.128238	5.1518	2.58e-07	8.79029e-07
RS06925	glycerol-3-phosphate_transporter	284.609	1.17596	0.132141	8.89935	5.61763e-19	4.12027e-18
RS06930	maltodextrin_phosphorylase	507.186	-0.365065	0.167398	-2.18082	0.0291967	0.049239
RS06935	4-alpha-glucanotransferase	208.74	-0.475529	0.140178	-3.39234	0.00069299	0.00156876
RS06940	LacI_family_transcriptional_regulator	1121.04	-0.875157	0.1039	-8.42308	3.66707e-17	2.40146e-16
RS06945	hypothetical_protein	1303.44	-1.179	0.126472	-9.3222	1.13956e-20	9.12098e-20
RS06950	maltose_ABC_transporter_permease	276.388	-0.856248	0.161339	-5.30712	1.1137e-07	3.90668e-07
RS06955	maltose_ABC_transporter_permease	315.963	-0.763672	0.178741	-4.2725	1.93295e-05	5.35545e-05
RS06960	MFS_transporter	1660.54	-0.211371	0.0910543	-2.32138	0.0202664	0.0355456
RS06970	IS3_family_transposase	233.76	0.103659	0.125158	0.828225	0.407543	0.506478
RS06975	72C8-dihydro-8-oxoguanine_triphosphatase	84.1103	0.582388	0.183883	3.16717	0.0015393	0.00328894
RS06980	peptidase	20.211	0.209564	0.343527	0.610037	0.541837	0.62918
RS06985	peptidase	58.4486	-0.387158	0.290808	-1.33132	0.183084	0.255557
RS06990	excinuclease_ABC_subunit_B	2212.67	0.482654	0.0859992	5.6123	1.99652e-08	7.45738e-08
RS06995	CPBP_family_intramembrane_metalloprotease_domain-containing_protein	1021.14	-0.749288	0.120502	-6.21807	5.03295e-10	2.14166e-09
RS07000	glutamine_ABC_transporter_permease	13948.7	0.974948	0.189233	5.15209	2.57594e-07	8.79029e-07
RS07005	peptide_ABC_transporter_ATP-binding_protein	10769.9	0.879665	0.356405	2.46816	0.0135808	0.0249704
RS07010	hypothetical_protein	236.778	-1.06269	0.17046	-6.23422	4.54048e-10	1.94441e-09
RS07015	hypothetical_protein	640.504	-0.906245	0.102138	-8.87271	7.13879e-19	5.19817e-18
RS07020	GTPase_ObgE	1299.58	-0.913198	0.105542	-8.65243	5.04127e-18	3.51842e-17
RS07025	DUF4044_domain-containing_protein	820.422	0.280443	0.083964	3.34004	0.000837656	0.00188356
RS07030	aminopeptidase	456.135	0.445677	0.204204	2.18251	0.0290718	0.0491103
RS07035	cell_wall_surface_anchor_protein	2646.71	-0.367163	0.120502	-3.04694	0.00231182	0.00476784
RS07040	amidase	1472.21	-0.483739	0.146538	-3.30111	0.000963029	0.00214396
RS07045	hypothetical_protein	39.2468	-0.19909	0.277473	-0.717512	0.473058	0.567404
RS07050	16S_rRNA_pseudouridine(516)_synthase	127.105	-0.224787	0.169286	-1.32786	0.184226	0.256618
RS07055	aldo/keto_reductase	5718.33	0.952712	0.141307	6.74215	1.5606e-11	7.45909e-11
RS07060	NAD(P)H-dependent_oxidoreductase	831.204	1.50841	0.0976661	15.4446	8.20324e-54	2.1771e-52
RS07065	lactoylglutathione_lyase	3116.71	0.811804	0.141285	5.74584	9.14661e-09	3.54102e-08
RS07070	glycosyltransferase	496.79	0.929022	0.108203	8.58595	9.00915e-18	6.15982e-17
RS07075	amino_acid_transporter	3193.69	-0.147941	0.101048	-1.46407	0.143175	0.20598
RS07080	SsrA-binding_protein	766.787	-0.408596	0.106545	-3.83498	0.000125575	0.0003194
RS07085	ribonuclease_R	1628.72	-0.392099	0.0862388	-4.54666	5.45032e-06	1.60019e-05
RS07090	preprotein_translocase_subunit_SecG	3752.39	-0.816042	0.0914252	-8.92579	4.42532e-19	3.26955e-18
RS07095	MFS_transporter	1425	0.30886	0.104457	2.95682	0.00310832	0.00630732
RS07100	hypothetical_protein	267.513	-0.402774	0.125516	-3.20895	0.0013322	0.00287385
RS07105	ABC_transporter_ATP-binding_protein	93.7685	-0.404076	0.211906	-1.90686	0.0565386	0.0902203
RS07110	dephospho-CoA_kinase	203.791	0.743228	0.144364	5.14828	2.62885e-07	8.94164e-07
RS07115	formamidopyrimidine-DNA_glycosylase	115.613	0.847091	0.185181	4.5744	4.77577e-06	1.40829e-05
RS07120	transcriptional_regulator	92.2255	0.566464	0.211659	2.6763	0.00744399	0.0142049
RS07125	transglutaminase	138.637	0.190351	0.155742	1.22222	0.221626	0.299511
RS07130	hypothetical_protein	23.2401	0.221118	0.345317	0.640334	0.521956	0.61244
RS07135	hypothetical_protein	25.6085	0.294276	0.356968	0.824376	0.409726	0.508564
RS07140	hypothetical_protein	47.0741	-0.152576	0.270065	-0.564959	0.572101	0.655423
RS07145	hypothetical_protein	635.743	-0.0703454	0.0955171	-0.736469	0.461445	0.55737
RS07150	GTPase_Era	1261.04	-0.261215	0.0939681	-2.77982	0.00543885	0.0106818
RS07155	UDP_kinase	397.973	-0.0430039	0.111593	-0.385363	0.699968	0.766885
RS07160	endoribonuclease_YbeY	903.204	-0.0427439	0.100784	-0.424112	0.671484	0.744167
RS07165	polyketide_synthesis_methyltransferase	193.901	0.765573	0.165953	4.6132	3.9651e-06	1.18228e-05
RS07170	DNA_mismatch_repair_protein_MutT	92.1118	0.103316	0.190917	0.541156	0.5884	0.670454
RS07175	nucleotidyltransferase	215.02	-0.00526979	0.192586	-0.0273633	0.97817	0.983534
RS07180	PhoH_family_protein	1006.23	0.755986	0.114763	6.58734	4.47776e-11	2.03874e-10
RS07185	oleate_hydratase	2836.92	2.07125	0.102649	20.1779	1.53218e-90	1.34365e-88
RS07190	hypothetical_protein	789.142	0.667793	0.107705	6.20018	5.64e-10	2.37492e-09
RS07195	peptide-methionine_(S)-S-oxide_reductase	637.444	0.796736	0.0931438	8.55383	1.19067e-17	8.08611e-17
RS07200	S1_RNA-binding_protein	968.277	-0.358146	0.0796479	-4.49662	6.90438e-06	2.00665e-05
RS07205	ribosome-recycling_factor	2883.42	-0.776655	0.0694217	-11.1875	4.69447e-29	5.60281e-28
RS07210	UMP_kinase	1812.13	-0.575439	0.0804804	-7.15005	8.67439e-13	4.53271e-12
RS07215	ABC_transporter_ATP-binding_protein	14.7034	0.10446	0.378808	0.27576	0.782733	0.83137
RS07220	peptide_ABC_transporter_ATP-binding_protein	24.2054	0.0681758	0.324237	0.210265	0.83346	0.872228
RS07225	peptide_ABC_transporter_permease	13.7649	-0.514319	0.398846	-1.28952	0.197218	0.272122
RS07230	peptide_ABC_transporter_permease	25.2163	-0.253116	0.353086	-0.716866	0.473457	0.567417
RS07235	nickel_ABC_transporter2C_nickel/metallophore_periplasmic_binding_protein	49.2976	-0.626034	0.268188	-2.33431	0.0195794	0.0344708
RS07240	50S_ribosomal_protein_L1	17938.1	-1.24411	0.0976584	-12.7395	3.56889e-37	5.80521e-36
RS07245	50S_ribosomal_protein_L11	7367.26	-1.33067	0.0791007	-16.8224	1.67195e-63	5.26926e-62
RS07250	transposase	39.7837	-0.133753	0.267551	-0.499915	0.617135	0.697345
RS07255	MFS_transporter	527.486	-0.438365	0.144464	-3.03442	0.00240995	0.00495501
RS07260	amidohydrolase	318.199	-0.404709	0.166875	-2.42521	0.0152993	0.0278007
RS07265	LysR_family_transcriptional_regulator	601.093	-0.604428	0.151749	-3.98308	6.80274e-05	0.000177276
RS07275	IS3_family_transposase	258.363	0.231235	0.122364	1.88974	0.058793	0.0932275
RS07280	aminodeoxychorismate_synthase2C_component_I	415.838	0.605866	0.115963	5.22466	1.74474e-07	5.99513e-07
RS07285	cell_division_protein_FtsK	1555.71	-0.574464	0.0734784	-7.81814	5.36104e-15	3.17103e-14
RS07290	peptidyl-prolyl_cis-trans_isomerase	946.475	1.05518	0.11039	9.55863	1.1933e-21	1.033e-20
RS07295	manganese_ABC_transporter_permease	1395.25	-0.588604	0.153382	-3.83752	0.000124285	0.000316662
RS07300	manganese_ABC_transporter_ATP-binding_protein	815.906	-0.614855	0.117385	-5.23791	1.62402e-07	5.62827e-07
RS07305	metal_ABC_transporter_substrate-binding_protein	2133.21	-0.985839	0.106702	-9.23921	2.48325e-20	1.94891e-19
RS07310	MarR_family_transcriptional_regulator	1629.86	0.0429266	0.0886769	0.484079	0.62833	0.706434
RS07315	5'-methylthioadenosine/S-adenosylhomocysteine_nucleosidase	944.046	-0.489608	0.119878	-4.08421	4.42264e-05	0.00011722
RS07320	hypothetical_protein	239.793	-0.482039	0.138496	-3.48054	0.000500407	0.00116147
RS07325	ADP-ribose_pyrophosphatase	421.939	-0.374027	0.10607	-3.52623	0.000421514	0.000990902
RS07330	bifunctional_N-acetylglucosamine-1-phosphate_uridyltransferase/glucosamine-1-phosphate_acetyltransferase	1282.68	-0.471225	0.0996029	-4.73104	2.23373e-06	6.81608e-06
RS07335	VOC_family_protein	99.6313	0.862393	0.18494	4.66309	3.1149e-06	9.37724e-06
RS07340	glyoxalase/bleomycin_resistance/extradiol_dioxygenase_family_protein	103.662	0.911146	0.202444	4.50074	6.77181e-06	1.97096e-05
RS07345	NAD(P)-dependent_oxidoreductase	1215.78	0.514008	0.164941	3.11631	0.00183131	0.00384366
RS07350	RNA-binding_protein	264.569	0.792647	0.120013	6.60466	3.98429e-11	1.82644e-10
RS07355	NAD(P)-dependent_dehydrogenase	351.953	0.919332	0.128806	7.13732	9.51684e-13	4.93457e-12
RS07360	hypothetical_protein	139.891	1.01711	0.167587	6.06914	1.286e-09	5.30443e-09
RS07365	aminoacyl-tRNA_synthetase	257.538	1.17141	0.139548	8.39431	4.6863e-17	3.02957e-16
RS07370	N-acetyltransferase	194.025	1.0734	0.156523	6.8578	6.99283e-12	3.45699e-11
RS07375	glycosyl_transferase	26.9724	0.144385	0.313999	0.459827	0.645641	0.723074
RS07380	hypothetical_protein	56.9334	0.0230655	0.236023	0.0977255	0.92215	0.946062
RS07385	hypothetical_protein	19.2257	-0.0224839	0.34686	-0.0648214	0.948316	0.964576
RS07390	DUF4956_domain-containing_protein	5.49077	-0.0371083	0.536686	-0.0691434	0.944876	0.963019
RS07395	molecular_chaperone	6.58554	-0.197986	0.527742	-0.375156	0.707544	0.774752
RS07400	branched-chain_amino_acid_ABC_transporter_substrate-binding_protein	349.338	-1.707	0.179566	-9.50627	1.9762e-21	1.68186e-20
RS07405	methionine--tRNA_ligase	4370.97	0.562117	0.0857548	6.55494	5.56657e-11	2.52878e-10
RS07410	tellurite_resistance_methyltransferase_TehB	531.257	1.01767	0.119861	8.49044	2.05859e-17	1.37489e-16
RS07415	DUF1275_family_protein	68.1778	-0.660485	0.230422	-2.86641	0.00415154	0.00829075
RS07420	hypothetical_protein	643.37	0.300961	0.155238	1.9387	0.052538	0.0841693
RS07425	acyltransferase	538.703	-0.0188153	0.139689	-0.134694	0.892853	0.924017
RS07430	exodeoxyribonuclease	1229.09	-0.302647	0.10589	-2.85813	0.00426146	0.00849345
RS07435	arsenate_reductase_family_protein	412.238	0.65471	0.104998	6.23547	4.50434e-10	1.93303e-09
RS07440	methylated-DNA--protein-cysteine_methyltransferase	357.019	0.480486	0.141359	3.39906	0.000676186	0.00153762
RS07445	phosphoglycerate_dehydrogenase	971.351	-0.874294	0.174976	-4.99664	5.83368e-07	1.92578e-06
RS07450	acetyltransferase	429.903	-0.678558	0.161415	-4.20381	2.62462e-05	7.1442e-05
RS07455	phosphoserine_transaminase	667.128	-0.812754	0.140957	-5.76599	8.11788e-09	3.16096e-08
RS07460	copper_homeostasis_protein_CutC	423.51	0.74562	0.115118	6.47699	9.3568e-11	4.15697e-10
RS07465	rRNA_(cytidine-2'-O-)-methyltransferase	1192.69	-0.105444	0.0845855	-1.24659	0.212547	0.289471
RS07470	initiation-control_protein_YabA	326.516	0.168122	0.108642	1.54748	0.121748	0.179507
RS07475	DNA_polymerase_III_subunit_delta'	790.018	0.276574	0.113993	2.42623	0.0152565	0.0277478
RS07480	thymidylate_kinase	872.961	0.732979	0.0946625	7.74308	9.7036e-15	5.64039e-14
RS07485	transposase	37.1415	-0.0901415	0.281137	-0.320632	0.748489	0.803033
RS07490	CBS_domain-containing_protein	11.9507	-0.367161	0.411009	-0.893317	0.371687	0.470027
RS07500	branched-chain_amino_acid_ABC_transporter_permease	7.39477	-0.412046	0.517121	-0.796807	0.425563	0.524992
RS07505	branched-chain_amino_acid_ABC_transporter_permease	3.34115	0.197851	0.577505	0.342596	0.731902	0.792403
RS07510	branched-chain_amino_acid_ABC_transporter_substrate-binding_protein	64.3282	-0.831881	0.264039	-3.1506	0.00162934	0.00346299
RS07515	hypothetical_protein	253.702	0.729314	0.168656	4.32427	1.53039e-05	4.29843e-05
RS07520	ATP-dependent_Clp_protease_proteolytic_subunit	2877.77	0.985241	0.0942038	10.4586	1.33812e-25	1.39844e-24
RS07525	uracil_phosphoribosyltransferase	2244.62	0.0545714	0.108158	0.504552	0.613874	0.694049
RS07530	cysteine_desulfhydrase	682.16	0.43506	0.110297	3.94444	7.99861e-05	0.000206836
RS07535	tRNA_(uridine(34)/cytosine(34)/5-carboxymethylaminomethyluridine(34)-2'-O)-methyltransferase_TrmL	358.33	-1.04522	0.188534	-5.54392	2.95768e-08	1.08862e-07
RS07540	amino_acid_permease	950.074	-0.553701	0.101472	-5.4567	4.85055e-08	1.76598e-07
RS07545	Trk_system_potassium_transport_protein_TrkA	1888.3	0.806555	0.0786059	10.2607	1.05887e-24	1.0573e-23
RS07550	Trk_system_potassium_transporter_TrkH	2087.62	0.366251	0.0830384	4.41063	1.03073e-05	2.96572e-05
RS07555	membrane_protein_insertion_efficiency_factor_YidD	392.856	-1.04301	0.140417	-7.42797	1.10279e-13	6.04435e-13
RS07560	ribosomal_large_subunit_pseudouridine_synthase_B	827.711	-1.14317	0.10311	-11.0869	1.45197e-28	1.71264e-27
RS07565	segregation/condensation_protein_B	398.121	-1.1061	0.125109	-8.84105	9.48219e-19	6.8797e-18
RS07570	segregation/condensation_protein_A	591.946	-1.00503	0.10191	-9.86194	6.08625e-23	5.57998e-22
RS07575	XerD-like_tyrosine_recombinase	660.736	-0.876498	0.10303	-8.50724	1.78125e-17	1.19361e-16
RS07580	CBS_domain-containing_protein	583.921	-0.650673	0.0985114	-6.60506	3.97363e-11	1.8257e-10
RS07585	phosphodiesterase	466.399	-0.75303	0.113484	-6.63554	3.23311e-11	1.50953e-10
RS07590	non-canonical_purine_NTP_pyrophosphatase	809.456	-0.565259	0.102075	-5.5377	3.06468e-08	1.12595e-07
RS07595	glutamate_racemase	707.88	-0.566292	0.101526	-5.57778	2.43603e-08	9.04876e-08
RS07600	hypothetical_protein	1136.69	-0.5763	0.115958	-4.96989	6.69913e-07	2.18997e-06
RS07605	hypothetical_protein	44.1274	0.0703531	0.243519	0.288902	0.772656	0.82414
RS07610	DNA-binding_protein	403.368	0.333175	0.162816	2.04633	0.0407241	0.0665645
RS07615	membrane_protein	2752.4	0.496737	0.0912734	5.4423	5.25971e-08	1.90464e-07
RS07620	hypothetical_protein	1365.68	0.285438	0.106165	2.68862	0.00717484	0.0137563
RS07625	23S_rRNA_methyltransferase	832.547	-0.158191	0.0887566	-1.78231	0.0746995	0.115899
RS07630	acylphosphatase	158.588	2.26387	0.169599	13.3484	1.21046e-40	2.23991e-39
RS07635	membrane_protein_insertase_YidC	3166.06	0.728129	0.0920674	7.90866	2.60179e-15	1.55261e-14
RS07640	amino_acid_ABC_transporter_permease	1601.47	-0.735969	0.147552	-4.98788	6.10465e-07	2.00866e-06
RS07645	ABC_transporter_substrate-binding_protein	1913.56	-0.827592	0.154356	-5.36159	8.24915e-08	2.93449e-07
RS07650	amidase	363.732	0.61501	0.143353	4.29017	1.78534e-05	4.96011e-05
RS07655	transcription_elongation_factor_GreA	1816.17	-0.929615	0.0869601	-10.6901	1.13215e-26	1.22771e-25
RS07660	aminodeoxychorismate_lyase	4818.72	-0.882843	0.0731195	-12.074	1.44957e-33	2.08841e-32
RS07665	N-acetyltransferase	582.458	-1.14422	0.149754	-7.64064	2.16138e-14	1.23499e-13
RS07670	UDP-N-acetylmuramate--L-alanine_ligase	3495.77	-0.325837	0.0814325	-4.00132	6.2991e-05	0.000164576
RS07675	hypothetical_protein	2248.76	-0.240214	0.0952511	-2.5219	0.0116721	0.0216385
RS07680	RNA_helicase	3081.2	1.04132	0.0813602	12.7989	1.66334e-37	2.7276e-36
RS07685	ribosome_biogenesis_GTPase_Der	2372.42	-0.649974	0.0726204	-8.9503	3.54523e-19	2.63864e-18
RS07690	primosomal_protein_DnaI	985.312	-0.335331	0.088785	-3.77688	0.000158802	0.000396907
RS07695	chromosome_replication_initiation_protein	953.604	-0.207297	0.0975531	-2.12497	0.0335894	0.0558531
RS07700	transcriptional_regulator_NrdR	414.382	-0.170326	0.11676	-1.45877	0.14463	0.207481
RS07705	two-component_sensor_histidine_kinase	4496.99	-0.00676292	0.0874066	-0.0773731	0.938327	0.957796
RS07710	DNA-binding_response_regulator	5953.7	0.167287	0.0636602	2.62782	0.00859346	0.016184
RS07715	hypothetical_protein	1017.81	1.60932	0.0955397	16.8445	1.1514e-63	3.68629e-62
RS07720	zinc_metalloprotease_HtpX	2790.65	0.420243	0.0802629	5.23583	1.64245e-07	5.66293e-07
RS07725	membrane_protein	1372.9	0.479442	0.0976044	4.91209	9.01099e-07	2.89414e-06
RS07730	ribosomal_RNA_small_subunit_methyltransferase_G	498.724	0.461662	0.108116	4.27007	1.95409e-05	5.39919e-05
RS07735	V-type_Na+_-ATPase_subunit_J	1227.18	0.350648	0.0958084	3.65989	0.000252328	0.000608059
RS07740	potassium_transporter_Trk	1160.9	0.207326	0.0875157	2.36902	0.0178352	0.031807
RS07745	cobalt_ABC_transporter_permease	992.842	-0.703999	0.11578	-6.08048	1.1982e-09	4.95242e-09
RS07750	heme_ABC_transporter_ATP-binding_protein	1258.3	-0.614072	0.0790695	-7.76623	8.08591e-15	4.72733e-14
RS07755	DUF3816_family_protein	517.302	-0.729203	0.0970136	-7.5165	5.62626e-14	3.13485e-13
RS07760	serine/threonine_transporter_SstT	2440.42	-0.444675	0.1252	-3.55171	0.00038274	0.000903966
RS07765	branched-chain_amino_acid_transporter	711.104	-1.37227	0.256399	-5.35207	8.69542e-08	3.08236e-07
RS07770	alcohol_dehydrogenase	611.002	-1.29256	0.242938	-5.32052	1.03471e-07	3.64225e-07
RS07775	ABC_transporter_permease	460.382	-1.0807	0.117759	-9.17724	4.42278e-20	3.39192e-19
RS07780	methionine_import_ATP-binding_protein_MetN	329.026	-1.19119	0.118814	-10.0256	1.17589e-23	1.12942e-22
RS07785	peptidase_M20	242.28	-1.14208	0.133921	-8.52807	1.48811e-17	1.00386e-16
RS07790	O-sialoglycoprotein_endopeptidase	435.428	-0.91457	0.121741	-7.5124	5.80547e-14	3.21693e-13
RS07795	ABC_transporter_substrate-binding_protein	492.493	0.503948	0.168012	2.99947	0.00270447	0.00553799
RS07800	glutamine_amidotransferase	158.67	0.550201	0.18403	2.98974	0.00279213	0.00570591
RS07805	transcriptional_regulator	2887.42	0.0531275	0.107475	0.494322	0.621079	0.699842
RS07810	hypothetical_protein	170.822	-1.12818	0.161151	-7.00075	2.54595e-12	1.2838e-11
RS07815	2-dehydropantoate_2-reductase	414.448	0.375658	0.115294	3.25825	0.00112101	0.00247383
RS07820	hypothetical_protein	3.01921	-0.0489736	0.569966	-0.0859238	0.931527	0.953232
RS07825	hypothetical_protein	2.23805	-0.765218	0.580098	-1.31912	0.18713	0.259767
RS07830	hypothetical_protein	0.325818	-0.275742	0.331214	-0.832521	0.405115	0.504082
RS07835	DhaKLM_operon_coactivator_DhaQ	115.603	-0.634022	0.186269	-3.4038	0.000664547	0.00151457
RS07840	dihydroxyacetone_kinase_transcriptional_activator_DhaS	41.3094	-0.254154	0.328203	-0.774382	0.438705	0.536014
RS07845	dihydroxyacetone_kinase_subunit_DhaK	860.254	-0.734037	0.185461	-3.95791	7.56096e-05	0.000196021
RS07850	dihydroxyacetone_kinase_subunit_L	158.73	-1.13973	0.249814	-4.5623	5.05958e-06	1.48763e-05
RS07855	PTS-dependent_dihydroxyacetone_kinase_phosphotransferase_subunit_DhaM	52.1565	-0.478786	0.294793	-1.62414	0.104345	0.156595
RS07860	glycerol_transporter	108.345	-0.163906	0.184453	-0.888609	0.374213	0.472333
RS07865	cupin	4515.35	1.82304	0.106438	17.1277	9.22513e-66	3.15375e-64
RS07870	MerR_family_transcriptional_regulator	183.805	-0.40365	0.139631	-2.89083	0.00384229	0.00769603
RS07875	hypothetical_protein	541.416	-0.423406	0.102782	-4.11947	3.79741e-05	0.000101583
RS07880	hypothetical_protein	114.159	-0.416056	0.177204	-2.34789	0.0188799	0.0333749
RS07885	SAM-dependent_methyltransferase	293.49	-0.367381	0.12509	-2.93694	0.00331467	0.00669909
RS07890	ribosome_silencing_factor_RsfS	578.072	-0.106993	0.0984819	-1.08642	0.277291	0.364838
RS07895	cysteine_hydrolase	802.56	-0.182273	0.107022	-1.70314	0.0885412	0.135191
RS07900	HD_domain-containing_protein	716.857	0.0542377	0.0927213	0.584954	0.558579	0.643802
RS07905	nicotinate-nicotinamide_nucleotide_adenylyltransferase	832.619	-0.0891313	0.0995106	-0.895697	0.370415	0.468712
RS07910	RNA-binding_protein	599.05	-0.113751	0.105568	-1.07751	0.281253	0.369088
RS07915	ribosome_biogenesis_GTPase_YqeH	1249.28	-0.0537939	0.0897108	-0.599637	0.548748	0.634894
RS07920	HAD_family_hydrolase	847.268	-0.0205106	0.103823	-0.197553	0.843395	0.880045
RS07925	EamA_family_transporter	184.738	-1.41249	0.144501	-9.775	1.44161e-22	1.2981e-21
RS07930	aspartyl/glutamyl-tRNA(Asn/Gln)_amidotransferase_subunit_B	3493.54	-0.306474	0.0833931	-3.67505	0.000237805	0.000575813
RS07935	glutamyl-tRNA(Gln)_amidotransferase_subunit_A	1951.35	-0.17718	0.08398	-2.10979	0.0348766	0.0577555
RS07940	aspartyl/glutamyl-tRNA(Asn/Gln)_amidotransferase_subunit_C	488.971	-0.156573	0.112208	-1.39538	0.162901	0.230901
RS07945	pyruvate2C_phosphate_dikinase	298.003	0.433844	0.126483	3.43005	0.000603481	0.00138478
RS07950	phosphoenolpyruvate_synthase_regulatory_protein	163.356	0.720341	0.152191	4.73314	2.21076e-06	6.76647e-06
RS07955	CBS_domain-containing_protein	163.005	1.11768	0.149193	7.49148	6.81023e-14	3.76335e-13
RS07960	3-hydroxybutyryl-CoA_dehydrogenase	2106.92	-0.370127	0.130613	-2.83378	0.00460015	0.0091234
RS07965	isochorismatase	243.051	0.141911	0.203725	0.69658	0.486066	0.578745
RS07970	GTP-sensing_pleiotropic_transcriptional_regulator_CodY	2429.02	-0.268825	0.100884	-2.6647	0.00770561	0.0146763
RS07975	aminotransferase	1652.44	0.676272	0.10112	6.68782	2.26512e-11	1.06746e-10
RS07980	universal_stress_protein_UspA	2278.39	0.300079	0.0963714	3.11377	0.00184711	0.00387279
RS07985	haloacid_dehalogenase	633.566	-0.167978	0.111459	-1.50708	0.13179	0.1911
RS07990	L-asparaginase	500.463	-0.224162	0.11803	-1.89919	0.05754	0.0916731
RS07995	shikimate_dehydrogenase	145.329	0.756726	0.153064	4.94387	7.65878e-07	2.48756e-06
RS08000	aldo/keto_reductase	541.765	1.48793	0.134443	11.0674	1.80615e-28	2.11802e-27
RS08005	DNA_helicase_RecG	1764.92	0.58043	0.0776497	7.47498	7.72163e-14	4.25533e-13
RS08010	CHAP_domain-containing_protein	8228.54	0.179935	0.109205	1.64768	0.0994185	0.150208
RS08015	alanine_racemase	824.237	0.195457	0.0936536	2.08702	0.0368862	0.0608335
RS08020	holo-ACP_synthase	258.607	0.117945	0.126298	0.933868	0.350372	0.446713
RS08025	phospho-2-dehydro-3-deoxyheptonate_aldolase	920.469	0.0224662	0.0968034	0.232081	0.816475	0.858827
RS08030	preprotein_translocase_subunit_SecA	8651.53	-0.337647	0.0596873	-5.65693	1.54104e-08	5.80988e-08
RS08035	mannose-6-phosphate_isomerase2C_class_I	1004.83	0.646269	0.114216	5.6583	1.52875e-08	5.77434e-08
RS08040	fructokinase	13.5958	0.65706	0.449276	1.46249	0.143608	0.206162
RS08045	PTS_beta-glucoside_transporter_subunit_EIIBCA	84.1767	0.0752297	0.200797	0.374655	0.707917	0.774752
RS08050	sucrose-6-phosphate_hydrolase	258.281	-0.0604212	0.208145	-0.290284	0.771599	0.823447
RS08055	LacI_family_transcriptional_regulator	222.58	-0.147282	0.171203	-0.860275	0.389637	0.488143
RS08060	N_utilization_substance_protein_B	2602.77	-0.315305	0.136903	-2.30313	0.0212715	0.037179
RS08065	Asp23/Gls24_family_envelope_stress_response_protein	1516.07	-0.17209	0.137998	-1.24704	0.212382	0.289442
RS08070	elongation_factor_P	2062.17	-0.352061	0.10617	-3.31602	0.000913107	0.00204637
RS08075	hypothetical_protein	128.938	0.247751	0.170924	1.44948	0.147202	0.210722
RS08080	hypothetical_protein	119.285	0.410785	0.188464	2.17965	0.0292837	0.0493443
RS08085	hypothetical_protein	166.662	0.400766	0.155827	2.57187	0.0101151	0.0188908
RS08090	hypothetical_protein	220.063	0.693361	0.135222	5.12757	2.935e-07	9.89948e-07
RS08095	peptidase_M24_family_protein	537.359	0.806568	0.0991272	8.1367	4.06201e-16	2.54443e-15
RS08100	DUF4811_domain-containing_protein	706.734	-1.45368	0.182993	-7.94392	1.95897e-15	1.183e-14
RS08105	MFS_transporter	665.515	-1.19126	0.182539	-6.52602	6.75415e-11	3.04768e-10
RS08110	excinuclease_ABC_subunit_A	2649.09	0.744294	0.0918608	8.10242	5.38784e-16	3.33352e-15
RS08115	membrane_protein	2172.38	0.236167	0.0895452	2.6374	0.00835439	0.0157484
RS08120	magnesium_transporter	2008.99	0.255004	0.0896007	2.84601	0.00442713	0.00880623
RS08125	30S_ribosomal_protein_S18	9104.92	-1.10012	0.116618	-9.43353	3.96531e-21	3.30497e-20
RS08130	Single-stranded_DNA-binding_protein_1	8461.99	-1.01303	0.0885445	-11.4409	2.61141e-30	3.31272e-29
RS08135	30S_ribosomal_protein_S6	4963.1	-1.03716	0.0918658	-11.2899	1.47171e-29	1.77751e-28
RS08140	A/G-specific_adenine_glycosylase	558.21	-0.0443812	0.100917	-0.43978	0.660097	0.735588
RS08145	transcriptional_regulator	133.348	0.321485	0.190704	1.68578	0.0918382	0.139802
RS08150	thiol_reductase_thioredoxin	7630.15	1.19841	0.111663	10.7324	7.17055e-27	7.94671e-26
RS08155	acid_phosphatase	353.871	0.0920895	0.119366	0.771486	0.440419	0.537402
RS08160	endonuclease_MutS2	1161.62	0.116792	0.0805362	1.45018	0.147009	0.210594
RS08165	colicin_V_production_protein	1325.16	-0.649806	0.0896107	-7.25143	4.12396e-13	2.18895e-12
RS08170	hypothetical_protein	381.398	-0.487924	0.143492	-3.40035	0.00067299	0.00153208
RS08175	ribonuclease_HIII	909.373	0.61384	0.103407	5.93615	2.9179e-09	1.17006e-08
RS08180	signal_peptidase_I	860.504	0.212628	0.0884431	2.40412	0.0162116	0.0293526
RS08185	helicase	927.133	0.651537	0.086554	7.52752	5.17122e-14	2.88929e-13
RS08190	hypothetical_protein	3134.86	-0.232556	0.0974158	-2.38726	0.0169747	0.0305696
RS08195	DNA_polymerase_IV	349.008	0.145729	0.130008	1.12092	0.26232	0.348092
RS08200	formate_acetyltransferase	9977.62	-0.503389	0.248384	-2.02666	0.0426975	0.0695645
RS08205	FMN-binding_protein	350.137	-0.569544	0.232716	-2.44738	0.0143901	0.0263622
RS08210	serine_hydrolase	1444.65	0.199866	0.102759	1.945	0.0517748	0.083211
RS08215	peptidase	763.668	0.407737	0.09793	4.16355	3.13333e-05	8.4491e-05
RS08220	anion_permease	347.445	-0.674798	0.132938	-5.07605	3.85366e-07	1.29117e-06
RS08225	aquaporin	4082.9	-0.720853	0.0696692	-10.3468	4.32728e-25	4.40815e-24
RS08230	universal_stress_protein_UspA	1952.58	-2.35003	0.546988	-4.29631	1.73664e-05	4.83872e-05
RS08235	MFS_transporter	2364.24	-2.24938	0.490276	-4.58799	4.47528e-06	1.32355e-05
RS08240	Crp/Fnr_family_transcriptional_regulator	444.084	1.02521	0.178648	5.73872	9.53937e-09	3.686e-08
RS08245	Xaa-Pro_dipeptidyl-peptidase	1394.71	0.655607	0.127681	5.13471	2.82581e-07	9.57924e-07
RS08250	hypothetical_protein	255.528	0.263624	0.138393	1.90489	0.0567948	0.0905574
RS08255	geranylgeranyl_pyrophosphate_synthase	2237.74	-0.219506	0.0934775	-2.34822	0.0188631	0.0333745
RS08260	amino_acid_ABC_transporter_ATP-binding_protein	1530.21	0.191865	0.24511	0.782768	0.433764	0.532891
RS08265	thiol_reductant_ABC_exporter_subunit_CydD	1897.97	0.28156	0.2095	1.34396	0.17896	0.250494
RS08270	cytochrome_c_oxidase_assembly_protein	3772.77	0.158307	0.160917	0.983782	0.325223	0.419421
RS08275	cytochrome_ubiquinol_oxidase_subunit_I	4864.11	-0.116674	0.149901	-0.778338	0.43637	0.53505
RS08280	NADH_dehydrogenase	4022.83	-0.428487	0.13723	-3.12239	0.00179388	0.00377688
RS08285	12C4-dihydroxy-2-naphthoate_octaprenyltransferase	4315.71	-0.553881	0.11254	-4.92164	8.58239e-07	2.76971e-06
RS08290	hypothetical_protein	97.7945	1.04238	0.192468	5.41585	6.09984e-08	2.18921e-07
RS08295	nucleoid-associated_protein2C_YbaB/EbfC_family	2063.65	0.342015	0.129262	2.64591	0.0081471	0.0154588
RS08300	cyclopropane-fatty-acyl-phospholipid_synthase	1943.59	1.14396	0.0933749	12.2512	1.65441e-34	2.50899e-33
RS08305	MerR_family_transcriptional_regulator	328.302	-0.999961	0.144621	-6.91434	4.70059e-12	2.34101e-11
RS08310	3'-5'_exonuclease	92.6412	-0.885985	0.260151	-3.40566	0.000660039	0.00150741
RS08315	hypothetical_protein	557.497	-1.25077	0.116322	-10.7527	5.75819e-27	6.41672e-26
RS08320	aminoacetone_oxidase_family_FAD-binding_enzyme	1469.67	-0.835218	0.113333	-7.36959	1.71159e-13	9.25541e-13
RS08325	DUF4931_domain-containing_protein	129.917	-0.44586	0.164095	-2.71709	0.00658588	0.0127239
RS08330	30S_ribosomal_protein_S14	525.303	-0.628705	0.111886	-5.61914	1.91913e-08	7.18162e-08
RS08335	amino_acid_lyase	360.348	0.77884	0.13159	5.91868	3.24541e-09	1.29623e-08
RS08340	tRNA_(adenosine(37)-N6)-threonylcarbamoyltransferase_complex_transferase_subunit_TsaD	1162.77	-0.385643	0.0877497	-4.3948	1.10873e-05	3.16758e-05
RS08345	ribosomal-protein-alanine_N-acetyltransferase_RimI	383.286	-0.295169	0.108155	-2.72912	0.00635027	0.0123277
RS08350	tRNA_(adenosine(37)-N6)-threonylcarbamoyltransferase_complex_dimerization_subunit_type_1_TsaB	558.863	-0.146272	0.096808	-1.51095	0.130801	0.190077
RS08355	hypothetical_protein	652.469	-0.214797	0.0997734	-2.15285	0.0313303	0.0524861
RS08360	ribonuclease_J	6206.01	-0.3645	0.072343	-5.0385	4.69204e-07	1.55912e-06
RS08365	CHAP_domain-containing_protein	293.424	-0.0698036	0.190754	-0.365936	0.714413	0.780299
RS08370	type_I_glutamate--ammonia_ligase	7212.72	1.03921	0.147981	7.0226	2.17771e-12	1.10363e-11
RS08375	MerR_family_transcriptional_regulator	2651.01	1.10322	0.175345	6.29169	3.14031e-10	1.35923e-09
RS08380	FUSC_family_protein	385.731	0.837104	0.122384	6.83996	7.92165e-12	3.90659e-11
RS08385	phosphoglycerate_kinase	27971.1	0.526554	0.139679	3.76975	0.00016341	0.000407413
RS08390	5'-nucleotidase2C_lipoprotein_e(P4)_family	774.729	1.56289	0.0984209	15.8797	8.76315e-57	2.48948e-55
RS08395	type_I_glyceraldehyde-3-phosphate_dehydrogenase	61365.7	0.353365	0.109546	3.22572	0.00125654	0.00271354
RS08400	elongation_factor_G	27589.6	-0.586365	0.06914	-8.48083	2.23588e-17	1.4839e-16
RS08405	30S_ribosomal_protein_S7	6142.76	-1.20072	0.0731116	-16.4231	1.30772e-60	4.05795e-59
RS08410	30S_ribosomal_protein_S12	7426.84	-1.15934	0.0980628	-11.8224	2.98985e-32	4.1305e-31
RS08415	pur_operon_repressor	1837.72	-0.468143	0.122752	-3.81374	0.000136879	0.00034597
RS08420	3'-5'_exoribonuclease_YhaM	860.497	-0.0599057	0.0874208	-0.685257	0.493182	0.584458
RS08425	DNA_recombination_protein_RmuC	784.607	-0.054567	0.0866146	-0.629997	0.528696	0.619269
RS08430	thiamine_pyrophosphokinase	328.045	-0.0175485	0.114866	-0.152773	0.878577	0.912978
RS08435	ribulose-phosphate_3-epimerase	631.526	0.0446377	0.0974166	0.458215	0.646798	0.723969
RS08440	ribosome_small_subunit-dependent_GTPase_A	935.333	0.37048	0.0904959	4.09389	4.24201e-05	0.000112878
RS08445	rRNA_(guanine-N1)-methyltransferase	910.408	-0.0779955	0.116192	-0.671265	0.502052	0.594272
RS08450	16S_rRNA_(adenine(1518)-N(6)/adenine(1519)-N(6))-dimethyltransferase	955.552	0.164351	0.0821666	2.00022	0.0454768	0.0734989
RS08455	hypothetical_protein	499.839	0.539686	0.0997968	5.40785	6.37865e-08	2.28521e-07
RS08460	ribonuclease_M5	251.453	0.586062	0.135326	4.33073	1.48616e-05	4.18658e-05
RS08465	TatD_family_hydrolase	472.3	0.646052	0.117283	5.50847	3.61973e-08	1.32738e-07
RS08470	hypothetical_protein	193.553	0.409803	0.168349	2.43425	0.0149229	0.0272867
RS08475	hypothetical_protein	123.404	0.587267	0.168038	3.49485	0.000474324	0.00110603
RS08480	hypothetical_protein	256.893	0.587571	0.148502	3.95666	7.60041e-05	0.000196791
RS08485	hypothetical_protein	67.3524	0.668495	0.206631	3.23521	0.00121553	0.00263911
RS08490	D-alanyl-lipoteichoic_acid_biosynthesis_protein_DltD	5431.28	0.00333678	0.0835756	0.0399253	0.968153	0.977731
RS08495	D-alanine--poly(phosphoribitol)_ligase_subunit_2	609.818	0.212889	0.089043	2.39085	0.0168092	0.0302987
RS08500	D-alanyl-lipoteichoic_acid_biosynthesis_protein_DltB	2833.15	0.148656	0.0871521	1.70571	0.0880621	0.134664
RS08505	D-alanine--poly(phosphoribitol)_ligase	2943.76	0.0393194	0.101286	0.388203	0.697866	0.76583
RS08510	teichoic_acid_D-Ala_incorporation-associated_protein_DltX	263.899	0.00537492	0.147825	0.03636	0.970995	0.979739
RS08515	two-component_sensor_histidine_kinase	1314.82	-0.125962	0.0982805	-1.28166	0.199963	0.27512
RS08520	DNA-binding_response_regulator	1058.88	-0.307788	0.100157	-3.07305	0.00211884	0.00439517
RS08525	50S_ribosomal_protein_L34	26283.3	-0.174969	0.0824184	-2.12293	0.0337595	0.0560141
RS08530	membrane_protein	844.453	-0.555792	0.116792	-4.7588	1.94743e-06	6.00607e-06
RS08535	transposase	40.2459	-0.0723784	0.270523	-0.26755	0.789046	0.83703
RS08540	glycine/betaine_ABC_transporter_permease	3280.11	-1.13967	0.414503	-2.74948	0.00596893	0.0116435
RS08545	glycine/betaine_ABC_transporter_ATP-binding_protein	1995.48	-1.26642	0.35352	-3.58231	0.000340566	0.000808142
RS08550	phosphoketolase	50.3212	-1.17209	0.271867	-4.31125	1.62333e-05	4.54128e-05
RS08555	L-ascorbate-6-phosphate_lactonase	197.625	-1.98537	0.20112	-9.87154	5.53076e-23	5.09386e-22
RS08560	L-ascorbate-6-phosphate_lactonase	794.783	-0.354637	0.155939	-2.2742	0.0229541	0.0398095
RS08565	hypothetical_protein	3.33149	-0.191373	0.562422	-0.340265	0.733657	0.793876
RS08570	carbohydrate_kinase	4.79513	-0.225494	0.538212	-0.418969	0.675239	0.747506
RS08575	amidohydrolase	7.83025	0.207594	0.516927	0.401593	0.687984	0.758286
RS08580	PTS_galactitol_transporter_subunit_IIC	11.8764	-0.152735	0.523363	-0.291834	0.770413	0.822617
RS08585	dihydrofolate_reductase	49.8868	0.0571443	0.276603	0.206593	0.836328	0.87448
RS08590	hypothetical_protein	15.3126	0.267824	0.386265	0.693369	0.488078	0.580114
RS08595	LacI_family_transcriptional_regulator	159.992	-0.754435	0.210542	-3.5833	0.000339283	0.000806046
RS08600	transaldolase	20.2676	0.237572	0.357679	0.664204	0.50656	0.598905
RS08605	L-ribulose-5-phosphate_4-epimerase	11.4905	0.365949	0.439426	0.83279	0.404963	0.504082
RS08610	L-xylulose_5-phosphate_3-epimerase	13.2809	0.221441	0.446534	0.49591	0.619958	0.69936
RS08615	3-keto-L-gulonate-6-phosphate_decarboxylase	5.60049	0.300709	0.524137	0.573722	0.566156	0.650854
RS08620	PTS_ascorbate_transporter_subunit_IIA	4.56976	-0.20169	0.54121	-0.372666	0.709397	0.775951
RS08625	PTS_ascorbate_transporter_subunit_IIB	23.9805	-0.990889	0.442018	-2.24174	0.0249785	0.0429877
RS08630	PTS_ascorbate_transporter_subunit_IIC	279.005	-2.52224	0.1995	-12.6428	1.22644e-36	1.96328e-35
RS08635	hypothetical_protein	1367.98	-0.108555	0.0916915	-1.18392	0.236447	0.317307
RS08645	adenylosuccinate_synthetase	3987.7	0.025605	0.121983	0.209906	0.833741	0.872228
RS08650	transcriptional_regulator	508.809	-0.285222	0.138936	-2.05291	0.0400817	0.0655675
RS08655	DNA-binding_protein	453.677	-0.596669	0.103256	-5.77856	7.53426e-09	2.9508e-08
RS08660	bifunctional_glutamate--cysteine_ligase/glutathione_synthetase	2396.52	1.31703	0.0736825	17.8744	1.86775e-71	7.10802e-70
RS08665	hypothetical_protein	467.112	1.04599	0.110897	9.43209	4.01996e-21	3.33673e-20
RS08670	hypothetical_protein	1147.49	0.940718	0.0854538	11.0085	3.47752e-28	4.03112e-27
RS08675	molecular_chaperone_Hsp33	932.221	-0.587387	0.0977967	-6.0062	1.89923e-09	7.70776e-09
RS08680	tRNA_dihydrouridine_synthase_DusB	1724.54	-0.39997	0.0810304	-4.93605	7.97206e-07	2.58515e-06
RS08685	deoxyadenosine_kinase	715.482	-0.772029	0.0929672	-8.30431	1.00398e-16	6.36804e-16
RS08690	N-acetyltransferase	591.965	-0.752524	0.112803	-6.67112	2.53852e-11	1.19352e-10
RS08695	chaperone_protein_ClpB	4083.65	0.236227	0.0876085	2.69639	0.00700958	0.0134779
RS08700	CtsR_family_transcriptional_regulator	467.001	0.337894	0.113147	2.98633	0.00282345	0.00576406
RS08705	hypothetical_protein	910.541	0.948235	0.0950386	9.97737	1.91471e-23	1.80466e-22
RS08710	elongation_factor_Ts	7852.67	-1.0746	0.0940099	-11.4307	2.93705e-30	3.70252e-29
RS08715	30S_ribosomal_protein_S2	9180.68	-0.973996	0.0648539	-15.0183	5.5723e-51	1.35414e-49
RS08720	peroxiredoxin	4063.94	0.656593	0.0971031	6.76181	1.36276e-11	6.56009e-11
RS08725	alkyl_hydroperoxide_reductase_subunit_F	7274.19	0.663174	0.076515	8.66725	4.427e-18	3.11124e-17
RS08735	sodium_hydrogen_antiporter	925.45	0.944133	0.0873977	10.8027	3.34157e-27	3.74442e-26
RS08740	hypothetical_protein	119.495	0.981864	0.183023	5.3647	8.10819e-08	2.88944e-07
RS08745	LD-carboxypeptidase	970.947	1.71161	0.159608	10.7239	7.86491e-27	8.57488e-26
RS08750	endopeptidase	600.416	-0.572118	0.168445	-3.39646	0.000682637	0.00155054
RS08755	oxidoreductase	2616.68	1.73934	0.0834626	20.8397	1.88836e-96	2.24049e-94
RS08760	MFS_transporter	723.6	-0.484382	0.157422	-3.07697	0.00209114	0.00435276
RS08765	Crp/Fnr_family_transcriptional_regulator	409.05	0.768191	0.115975	6.62374	3.50218e-11	1.62763e-10
RS08770	peptide_deformylase	1421.74	-0.178517	0.0862768	-2.06912	0.0385344	0.0633963
RS08775	transcriptional_regulator	820.15	0.231867	0.122203	1.89738	0.0577775	0.0919789
RS08780	oligohyaluronate_lyase	23.3018	-0.310765	0.401347	-0.774305	0.43875	0.536014
RS08785	PTS_N-acetylglucosamine_transporter_subunit_IIBC	15.9479	-0.539205	0.393805	-1.36922	0.170931	0.24076
RS08790	PTS_N-acetylgalactosamine_transporter_subunit_IIC	11.4142	-0.593649	0.429156	-1.38329	0.166574	0.235324
RS08795	PTS_N-acetylgalactosamine_transporter_subunit_IIB	5.26055	0.177857	0.518166	0.343242	0.731416	0.792302
RS08800	glucuronyl_hydrolase	16.9965	-0.463847	0.379574	-1.22202	0.221701	0.299511
RS08805	PTS_mannose_transporter_subunit_IIA	8.44039	-1.251	0.479809	-2.60729	0.00912613	0.0171391
RS08810	gluconate_5-dehydrogenase	150.341	-0.659409	0.183272	-3.59797	0.000320709	0.000763719
RS08815	hypothetical_protein	58.916	-0.658462	0.242934	-2.71046	0.00671897	0.0129562
RS08820	2-keto-3-deoxygluconate_kinase	90.0096	-0.482648	0.217018	-2.224	0.0261482	0.0447715
RS08825	bifunctional_2-keto-4-hydroxyglutarate_aldolase/2-keto-3-deoxy-6-phosphogluconate_aldolase	39.6405	-0.209323	0.269958	-0.775392	0.438108	0.536014
RS08830	hypothetical_protein	171.982	-0.449202	0.199241	-2.25456	0.0241609	0.0417946
RS08835	hypothetical_protein	609.547	-0.55998	0.145927	-3.83741	0.000124341	0.000316662
RS08840	MarR_family_transcriptional_regulator	182.175	-1.05009	0.155679	-6.74521	1.5281e-11	7.32111e-11
RS08845	DNA_polymerase_III_subunit_alpha	2247.75	-0.271924	0.0858871	-3.16606	0.00154518	0.00329802
RS08850	N-acetylmuramoyl-L-alanine_amidase	549.03	1.8194	0.118366	15.371	2.56377e-53	6.62964e-52
RS08855	proline--tRNA_ligase	2932.6	0.11759	0.0748275	1.57149	0.11607	0.171889
RS08860	RIP_metalloprotease_RseP	1232.66	0.364208	0.078604	4.63345	3.59625e-06	1.07621e-05
RS08865	phosphatidate_cytidylyltransferase	932.548	0.577194	0.0979086	5.89523	3.74161e-09	1.48852e-08
RS08870	isoprenyl_transferase	537.178	0.504707	0.0963909	5.23605	1.64053e-07	5.66293e-07
RS08875	preprotein_translocase_subunit_YajC	6951.66	0.229777	0.096315	2.38568	0.0170476	0.0306665
RS08880	thiol_reductase_thioredoxin	546.063	0.532437	0.10754	4.95108	7.38026e-07	2.40097e-06
RS08885	malate_dehydrogenase	17.3308	0.162534	0.38314	0.424215	0.671409	0.744167
RS08890	L-malate_permease	11.0417	0.201196	0.489712	0.410845	0.681186	0.752851
RS08895	histidine_kinase	239.361	-0.218962	0.185125	-1.18278	0.236896	0.317699
RS08900	two-component_system_response_regulator_DcuR	124.476	-0.114716	0.162716	-0.705006	0.480806	0.574178
RS08905	UDP-glucose_4-epimerase_GalE	1743.35	1.06657	0.0913107	11.6806	1.60112e-31	2.12465e-30
RS08910	glucohydrolase	152.205	0.189147	0.152188	1.24285	0.213923	0.290561
RS08915	ABC_transporter_ATP-binding_protein	1408.06	-0.236705	0.124971	-1.89407	0.0582155	0.0924573
RS08920	Fis_family_transcriptional_regulator	244.316	0.503121	0.159281	3.1587	0.00158473	0.00337886
RS08925	protein_lacX	115.191	-0.272437	0.181579	-1.50038	0.133517	0.19305
RS08930	tagatose_12C6-diphosphate_aldolase	82.2484	-0.0449582	0.220455	-0.203934	0.838405	0.875981
RS08935	tagatose-6-phosphate_kinase	70.0348	0.200735	0.212822	0.943206	0.345576	0.441156
RS08950	galactose-6-phosphate_isomerase	19.6342	-0.597188	0.361678	-1.65116	0.0987065	0.149356
RS08955	galactose-6-phosphate_isomerase_subunit_LacA	9.16491	-0.307848	0.463825	-0.663715	0.506873	0.598924
RS08960	hypothetical_protein	517.15	-1.18581	0.119039	-9.96154	2.24549e-23	2.09683e-22
RS08965	PTS_mannose_transporter_subunit_IIC	14.8468	-0.247592	0.403211	-0.614052	0.539181	0.627191
RS08970	PTS_fructose_transporter_subunit_IIB	5.80179	-0.76875	0.515723	-1.49063	0.13606	0.196163
RS08975	PTS_galactose_transporter_subunit_IIA	5.94646	-0.654318	0.548044	-1.19392	0.232511	0.313276
RS08980	DeoR_family_transcriptional_regulator	611.728	0.60837	0.114664	5.30567	1.12259e-07	3.93103e-07
RS08985	histidine_triad_protein	20.2095	-0.417412	0.413037	-1.01059	0.312212	0.404711
RS08990	adhesion_protein	5.1222	0.374872	0.521811	0.718406	0.472507	0.56729
RS08995	D-tyrosyl-tRNA(Tyr)_deacylase	635.043	-0.168793	0.15513	-1.08808	0.276562	0.364116
RS09000	GTP_pyrophosphokinase	1460.19	-0.327493	0.0884262	-3.70357	0.000212585	0.000518482
RS09005	2'2C3'-cyclic-nucleotide_2'-phosphodiesterase	278.821	-2.2102	0.220165	-10.0388	1.02887e-23	9.9771e-23
RS09010	class_Ib_ribonucleoside-diphosphate_reductase_assembly_flavoprotein_NrdI	296.924	0.885045	0.148101	5.97595	2.28757e-09	9.22805e-09
RS09015	peptidase_M42	931.29	0.933361	0.124186	7.51583	5.65511e-14	3.14224e-13
RS09020	zeta_toxin	655.267	0.741137	0.11942	6.20613	5.43037e-10	2.29624e-09
RS09030	iron_ABC_transporter_substrate-binding_protein	154.119	-0.000414313	0.146716	-0.00282392	0.997747	0.997747
RS09035	DNA-binding_response_regulator	81.6727	-0.0488931	0.197314	-0.247793	0.804294	0.848907
RS09040	sensor_histidine_kinase	164.401	0.0615054	0.157714	0.38998	0.696551	0.76522
RS09045	PTS_mannose_transporter_subunit_IID	18.7146	-1.08006	0.446895	-2.41682	0.0156569	0.0283992
RS09050	PTS_mannose_transporter_subunit_IIC	11.6595	-0.528824	0.41777	-1.26582	0.205576	0.28097
RS09055	PTS_sorbose_transporter_subunit_IIB	15.691	-0.512123	0.384936	-1.33041	0.183383	0.255797
RS09060	PTS_mannose_transporter_subunit_IIA	25.243	0.126499	0.362671	0.348797	0.727241	0.790752
RS09065	alanine_racemase	77.1282	-0.0676739	0.254082	-0.266346	0.789972	0.83703
RS09070	membrane_protein	183.849	-0.445978	0.141983	-3.14107	0.00168331	0.00357393
RS09075	ABC_transporter_ATP-binding_protein	93.4978	-0.545116	0.241622	-2.25607	0.024066	0.0416662
RS09080	hypothetical_protein	30.2184	-0.297649	0.292026	-1.01926	0.308082	0.400129
RS09085	ABC_transporter_ATP-binding_protein	4.11442	-0.223621	0.553814	-0.403783	0.686372	0.757273
RS09090	TCS_sensor_kinase	138.053	-0.567169	0.205073	-2.76569	0.00568025	0.0111342
RS09095	DNA-binding_response_regulator	40.3745	-0.792209	0.257623	-3.07507	0.00210453	0.00437161
RS09100	RgfB_protein	56.265	-0.269478	0.227158	-1.1863	0.235502	0.316282
RS09105	PTS_glucose_transporter_subunit_IIABC	179.491	-0.840858	0.188549	-4.45962	8.21042e-06	2.37255e-05
RS09110	histidine_kinase	489.67	0.840076	0.11724	7.16547	7.75202e-13	4.08246e-12
RS09115	DNA-binding_response_regulator	119.546	0.974444	0.175014	5.56781	2.57965e-08	9.56462e-08
RS09120	phosphate_transport_system_regulatory_protein_PhoU	24.9612	0.567937	0.334805	1.69632	0.0898246	0.136943
RS09125	phosphate_ABC_transporter_ATP-binding_protein	12.1776	0.706575	0.420835	1.67898	0.0931555	0.141168
RS09130	phosphate_ABC_transporter2C_permease_protein_PstA	27.1575	1.19324	0.327667	3.64163	0.000270918	0.000650527
RS09135	phosphate_ABC_transporter_permease_subunit_PstC	16.8113	0.586046	0.3883	1.50926	0.131232	0.190565
RS09140	phosphate-binding_protein	19.3648	1.37435	0.364567	3.76981	0.000163373	0.000407413
RS09145	thymidylate_kinase	665.46	0.351398	0.0974888	3.6045	0.000312758	0.000745665
RS09150	16S_rRNA_(uracil(1498)-N(3))-methyltransferase	302.879	0.333822	0.119682	2.78923	0.00528327	0.0103863
RS09155	50S_ribosomal_protein_L11_methyltransferase	305.579	0.554215	0.120906	4.58385	4.56492e-06	1.34809e-05
RS09160	hypothetical_protein	251.72	0.629449	0.126481	4.97664	6.46976e-07	2.12187e-06
RS09165	MerR_family_transcriptional_regulator	240.234	0.977246	0.138488	7.05654	1.70703e-12	8.67276e-12
RS09170	N-acetyltransferase	462.201	0.510869	0.10054	5.08123	3.7499e-07	1.25849e-06
RS09175	DNA_mismatch_repair_protein_MutT	195.494	0.565111	0.149477	3.7806	0.000156449	0.00039151
RS09180	hypothetical_protein	260.624	0.48246	0.137386	3.51173	0.000445207	0.00104174
RS09185	N-acetyltransferase	158.711	0.202454	0.162596	1.24513	0.213083	0.289808
RS09190	recombinase_RarA	544.51	0.00279227	0.095492	0.0292408	0.976673	0.983008
RS09200	site-specific_integrase	181.883	-0.108263	0.142106	-0.761843	0.446154	0.544009
RS09205	hypothetical_protein	5.26873	0.198893	0.512289	0.388243	0.697836	0.76583
RS09210	hypothetical_protein	86.4378	-0.0671909	0.261132	-0.257306	0.796943	0.842029
RS09215	cell_wall_anchor	10.0611	0.460675	0.460167	1.0011	0.316777	0.410102
RS09220	hypothetical_protein	2.36806	0.0703382	0.578716	0.121542	0.903262	0.932384
RS09225	amidase	5.20823	0.268759	0.53164	0.505528	0.613188	0.694049
RS09235	hypothetical_protein	40.0909	0.699199	0.338924	2.063	0.0391128	0.064243
RS09240	conjugal_transfer_protein	37.0598	-0.0274815	0.303361	-0.0905903	0.927818	0.949954
RS09245	conjugal_transfer_protein	3.33293	0.412007	0.570432	0.722272	0.470127	0.565442
RS09250	hypothetical_protein	1.18753	-0.0782281	0.555049	-0.140939	0.887918	0.920787
RS09255	conjugal_transfer_protein	4.42734	0.257038	0.547675	0.469326	0.638836	0.717047
RS09260	Txe/YoeB_family_addiction_module_toxin	158.796	0.268605	0.185079	1.4513	0.146698	0.210298
RS09265	prevent-host-death_protein	175.073	0.424065	0.155845	2.72108	0.00650694	0.0125834
RS09270	hypothetical_protein	0.476787	0.095448	0.449255	0.212459	0.831749	0.8715
RS09275	hypothetical_protein	1.81901	-0.205919	0.575925	-0.357545	0.720684	0.784891
RS09280	hypothetical_protein	9.63828	1.0769	0.453035	2.37709	0.0174499	0.0312303
RS09285	hypothetical_protein	1261.71	0.0552035	0.089805	0.614704	0.53875	0.627191
RS09290	transporter	1614.5	0.225874	0.0744975	3.03197	0.00242967	0.00499047
RS09295	transcriptional_regulator	2.48683	-0.50245	0.579343	-0.867275	0.385791	0.485125
RS09300	hypothetical_protein	2.55257	-0.429568	0.576914	-0.744597	0.456515	0.552696
RS09305	Cro/Cl_family_transcriptional_regulator	4.05059	-0.351252	0.564817	-0.621887	0.534016	0.622607
RS09310	cell_division_protein_FtsK	4.62426	-0.432349	0.551871	-0.783425	0.433378	0.532891
RS09315	hypothetical_protein	2.22345	0.0347016	0.578495	0.059986	0.952167	0.967029
RS09320	hypothetical_protein	0.532949	-0.320679	0.474406	-0.675958	0.499067	0.591085
RS09325	cell_wall_surface_anchor_protein	6.73992	-0.63522	0.501142	-1.26754	0.204961	0.28052
RS09330	hypothetical_protein	15.1537	0.545825	0.406614	1.34237	0.179478	0.251045
RS09335	hypothetical_protein	2.15377	0.207244	0.569764	0.363736	0.716055	0.781116
RS09340	hypothetical_protein	0.851978	-0.0184426	0.529673	-0.0348189	0.972224	0.979998
RS09345	hypothetical_protein	1.32071	0.410878	0.543924	0.755395	0.450012	0.546792
RS09350	transcriptional_regulator	2.29043	0.521479	0.580074	0.898987	0.36866	0.466784
RS09355	transcriptional_regulator	318.113	0.117839	0.128731	0.915385	0.359989	0.457529
RS09360	transcriptional_regulator	307.745	-0.08061	0.121111	-0.665588	0.505674	0.598208
RS09365	hypothetical_protein	813.643	-0.236647	0.105448	-2.2442	0.0248192	0.0428233
RS09370	hypothetical_protein	243.178	0.696353	0.142259	4.89498	9.83181e-07	3.14774e-06
RS09375	hypothetical_protein	123.887	0.454873	0.182336	2.4947	0.0126065	0.0232851
RS09380	XRE_family_transcriptional_regulator	64.2663	0.715148	0.211535	3.38075	0.000722889	0.0016346
RS09385	hypothetical_protein	1406.4	-0.175006	0.129994	-1.34626	0.178217	0.249628
RS09390	ISL3_family_transposase	67.4367	0.395348	0.21167	1.86776	0.0617957	0.0975288
RS09395	mercury(II)_reductase	89.5662	0.771176	0.202471	3.80883	0.000139626	0.000352473
RS09400	Hg(II)-responsive_transcriptional_regulator	37.2955	0.42058	0.302411	1.39076	0.164299	0.232718
RS09405	manganese_transporter	1013.39	0.0671706	0.0867221	0.77455	0.438605	0.536014
RS09410	ABC_transporter_permease	328.123	-0.231828	0.183156	-1.26574	0.205608	0.28097
RS09415	ABC_transporter_ATP-binding_protein	185.5	-0.534682	0.143836	-3.7173	0.000201364	0.0004935
RS09420	YydF_family_exported_signaling_peptide	231.468	-0.351902	0.161504	-2.1789	0.029339	0.0493551
RS09425	hypothetical_protein	58.2725	-1.0819	0.256233	-4.22235	2.41765e-05	6.61655e-05
RS09430	YydG_family_peptide_radical_SAM_peptide_maturase	59.7257	-1.34885	0.303155	-4.44936	8.61278e-06	2.48526e-05
RS09435	hypothetical_protein	276.341	0.207289	0.119626	1.7328	0.0831308	0.128094
RS09440	hypothetical_protein	256.188	0.257404	0.120977	2.12771	0.0333611	0.055611
RS09445	hypothetical_protein	681.484	0.535937	0.0997247	5.37416	7.69399e-08	2.74669e-07
RS09450	hypothetical_protein	243.355	0.329969	0.133239	2.47653	0.0132668	0.0244153
RS09455	hypothetical_protein	293.47	0.396001	0.119442	3.31543	0.000915031	0.00204841
RS09460	hypothetical_protein	246.433	0.387266	0.123883	3.12606	0.00177167	0.00373793
RS09465	hypothetical_protein	160.619	0.39371	0.150071	2.62348	0.0087036	0.0163608
RS09470	streptomycin_resistance_protein	342.385	0.311892	0.131476	2.37224	0.0176804	0.0315867
RS09475	hypothetical_protein	76.9992	-0.129047	0.211923	-0.608935	0.542567	0.629303
RS09480	hypothetical_protein	102.291	-0.206672	0.174157	-1.1867	0.235344	0.316282
RS09485	PadR_family_transcriptional_regulator	48.9083	0.132188	0.269808	0.489933	0.624182	0.702945
RS09490	N-acetyltransferase	114.257	0.45116	0.192822	2.33978	0.0192951	0.0340492
RS09495	ABC_transporter_permease	105.421	-0.0615809	0.179286	-0.343478	0.731239	0.792302
RS09500	ABC_transporter_ATP-binding_protein	118.855	-0.161874	0.213408	-0.758521	0.448139	0.545173
RS09505	hypothetical_protein	29.03	-0.117711	0.29032	-0.405453	0.685144	0.756398
RS09510	transcriptional_regulator	179.455	0.179297	0.155813	1.15072	0.249849	0.332857
RS09525	PAP2_family_phosphoesterase	123.772	1.21318	0.177919	6.81871	9.18595e-12	4.4971e-11
RS09530	hypothetical_protein	79.6334	-0.585258	0.198313	-2.95117	0.00316568	0.00641081
RS09535	Rossman_fold_protein2C_TIGR00730_family	256.318	-0.644639	0.163552	-3.94148	8.09793e-05	0.000209136
RS09540	CPBP_family_intramembrane_metalloprotease	419.063	0.595942	0.168607	3.53451	0.000408536	0.000962637
RS09545	rhodanese	1369.79	-1.24555	0.200868	-6.20084	5.61609e-10	2.3698e-09
RS09550	hypothetical_protein	2836.27	-1.21713	0.171603	-7.09274	1.31484e-12	6.71399e-12
RS09555	topology_modulation_protein	161.874	0.686381	0.147374	4.65742	3.20202e-06	9.61084e-06
RS09560	glycerol_dehydrogenase	254.999	-0.507475	0.174381	-2.91015	0.00361258	0.00725755
RS09565	cyclic_nucleotide-binding_protein	674.53	2.59373	0.174348	14.8768	4.66429e-50	1.10681e-48
RS09570	bifunctional_homocysteine_S-methyltransferase/methylenetetrahydrofolate_reductase	67.2474	-1.04207	0.213556	-4.87961	1.06294e-06	3.37631e-06
RS09575	5-methyltetrahydropteroyltriglutamate--homocysteine_S-methyltransferase	50.6488	-0.794273	0.238016	-3.33706	0.000846704	0.00190178
RS09580	branched-chain_amino_acid_transporter	89.7416	-0.934966	0.206216	-4.53392	5.78982e-06	1.69493e-05
RS09585	branched-chain_amino_acid_transporter_AzlC	94.601	-0.791635	0.20273	-3.90488	9.42715e-05	0.000241608
RS09590	hypothetical_protein	112.298	-0.608449	0.187259	-3.24923	0.00115717	0.00254381
RS09595	DNA-binding_response_regulator	204.025	1.31024	0.135297	9.68412	3.52231e-22	3.1024e-21
RS09600	two-component_sensor_histidine_kinase	472.094	1.188	0.14959	7.94169	1.99449e-15	1.20086e-14
RS09605	hypothetical_protein	371.777	1.32315	0.112239	11.7886	4.46829e-32	6.04869e-31
RS09610	leucine--tRNA_ligase	3853.57	-0.37974	0.101494	-3.74152	0.000182914	0.00045213
RS09615	transposase	43.5966	0.245607	0.25955	0.946279	0.344006	0.439988
RS09620	MFS_transporter	354.237	-1.01924	0.198572	-5.13284	2.85397e-07	9.65847e-07
RS09625	patatin_family_protein	477.495	0.512253	0.100332	5.1056	3.29741e-07	1.10848e-06
RS09630	hypothetical_protein	659.924	-0.117637	0.100022	-1.1761	0.239553	0.32041
RS09635	hypothetical_protein	1021.59	-0.200367	0.0992238	-2.01934	0.0434514	0.0704514
RS09640	transcription_termination/antitermination_protein_NusG	2407.1	0.0908436	0.14461	0.628199	0.529874	0.620288
RS09645	pathogenicity_protein	49.1463	-0.278557	0.234581	-1.18747	0.235044	0.316267
RS09650	preprotein_translocase_subunit_SecE	1004.77	0.405681	0.104519	3.88139	0.00010386	0.000265617
RS09655	50S_ribosomal_protein_L33	575.169	0.407094	0.106272	3.83067	0.000127793	0.000324224
RS09660	penicillin-binding_protein_2A	1331.6	1.07004	0.100172	10.682	1.23576e-26	1.33291e-25
RS09665	RNA_pseudouridine_synthase	353.586	-0.19682	0.110899	-1.77477	0.0759365	0.117457
RS09670	hypothetical_protein	828.973	0.737588	0.108226	6.81528	9.40777e-12	4.59454e-11
RS09675	phosphopentomutase	1324.68	0.933902	0.111543	8.37258	5.63702e-17	3.62098e-16
RS09680	2-deoxyribose-5-phosphate_aldolase	1066.93	0.428357	0.102661	4.17255	3.01209e-05	8.14394e-05
RS09685	hypothetical_protein	2076.72	0.801719	0.124439	6.44265	1.17403e-10	5.17033e-10
RS09690	uridine_phosphorylase	820.011	0.8603	0.17791	4.83558	1.3276e-06	4.17098e-06
RS09695	GntR_family_transcriptional_regulator	318.839	1.30451	0.126805	10.2875	8.0209e-25	8.08908e-24
RS09700	hypothetical_protein	118.109	1.19085	0.192437	6.18828	6.0825e-10	2.5506e-09
RS09705	molecular_chaperone_GroEL	5222.47	0.857196	0.109898	7.79995	6.19325e-15	3.64192e-14
RS09710	co-chaperone_GroES	882.691	0.702068	0.126237	5.56151	2.67454e-08	9.89826e-08
RS09715	ABC_transporter_ATP-binding_protein	129.57	-0.134199	0.171534	-0.782348	0.43401	0.532891
RS09730	haloacid_dehalogenase	136.821	0.0402411	0.168628	0.238638	0.811386	0.85519
RS09735	glyoxalase	26.5753	0.448188	0.322432	1.39002	0.164522	0.232871
RS09740	peroxide_stress_protein_YaaA	239.526	0.302449	0.135448	2.23296	0.0255515	0.0438244
RS09745	anaerobic_ribonucleoside-triphosphate_reductase_activating_protein	311.6	-0.495156	0.175208	-2.8261	0.00471181	0.00931737
RS09750	GNAT_family_acetyltransferase	1649.19	-0.425106	0.172407	-2.4657	0.0136744	0.0251195
RS09755	hypothetical_protein	1811.22	-0.303421	0.186918	-1.62328	0.104529	0.156638
RS09760	hypothetical_protein	790.549	-0.527439	0.182605	-2.88842	0.00387182	0.00774748
RS09765	anaerobic_ribonucleoside-triphosphate_reductase	2424.35	-2.16317	0.182311	-11.8652	1.79386e-32	2.51265e-31
RS09770	hypothetical_protein	2274.8	-0.565571	0.0892836	-6.33454	2.38043e-10	1.03477e-09
RS09775	hypothetical_protein	12.1842	-0.148357	0.407629	-0.363952	0.715894	0.781116
RS09780	hypothetical_protein	6476.64	1.39804	0.098479	14.1963	9.65329e-46	2.07135e-44
RS09785	Holliday_junction_resolvase_RuvX	3807.96	1.47795	0.0732141	20.1867	1.28173e-90	1.17512e-88
RS09790	hypothetical_protein	2221.5	1.66377	0.0924435	17.9977	2.02945e-72	7.87191e-71
RS09795	arsenate_reductase	9195.19	2.91323	0.153481	18.981	2.44717e-80	1.26563e-78
RS09800	DNA_recombination/repair_protein_RecA	3642.79	0.0219094	0.0863044	0.253862	0.799602	0.844397
RS09805	damage-inducible_protein_A	515.373	0.913029	0.113381	8.05278	8.09326e-16	4.96173e-15
RS09810	DNA-3-methyladenine_glycosylase_I	426.343	-0.000700436	0.114576	-0.00611331	0.995122	0.99611
RS09815	Holliday_junction_branch_migration_protein_RuvA	414.453	0.15568	0.102512	1.51865	0.128851	0.18792
RS09820	MFS_transporter	851.689	0.295518	0.0847056	3.48876	0.000485259	0.00112891
RS09825	DNA_mismatch_repair_protein_MutL	1339.21	0.361654	0.0897429	4.02989	5.58024e-05	0.000146937
RS09830	cold-shock_protein	16719.9	0.0965143	0.158386	0.609362	0.542284	0.629303
RS09835	DNA_mismatch_repair_protein_MutS	1257.99	0.242031	0.0750303	3.22578	0.00125629	0.00271354
RS09840	arginine_repressor	426.819	0.667363	0.105292	6.33821	2.32445e-10	1.01262e-09
RS09845	arginine--tRNA_ligase	2911.95	0.131273	0.112926	1.16247	0.245044	0.326888
RS09850	bacteriocin_immunity_protein	476.987	1.13266	0.129945	8.71648	2.86975e-18	2.03097e-17
RS09855	membrane_protein	701.309	-0.127563	0.148802	-0.857269	0.391296	0.489909
RS09860	membrane_protein	1453.25	-0.206846	0.116506	-1.77541	0.07583	0.117382
RS09865	aspartate--tRNA_ligase	3343.13	0.111368	0.0742908	1.49908	0.133853	0.193396
RS09870	histidine--tRNA_ligase	1929.85	0.229784	0.104887	2.19077	0.0284683	0.0482121
RS09875	50S_ribosomal_protein_L32	8155.33	-1.142	0.103389	-11.0457	2.30061e-28	2.68227e-27
RS09880	50S_ribosomal_protein_L33	4294.68	-1.01178	0.104328	-9.69807	3.07266e-22	2.7302e-21
RS09885	cadmium_transporter	219.21	0.538095	0.15433	3.48665	0.000489115	0.00113657
RS09890	transcriptional_regulator	205.912	0.573756	0.161783	3.54645	0.000390459	0.000921119
RS09895	transcriptional_regulator	595.504	0.448853	0.106453	4.21644	2.48187e-05	6.77393e-05
RS09900	DNA-directed_RNA_polymerase_sigma-70_factor	2.20207	-0.151206	0.579019	-0.261141	0.793984	0.839782
RS09905	hypothetical_protein	9.84523	0.145189	0.443997	0.327003	0.743665	0.799464
RS09910	cell_division_protein_FtsK	16.4901	0.348238	0.419271	0.830578	0.406212	0.505135
RS09915	hypothetical_protein	19.5035	1.4763	0.358536	4.11758	3.82866e-05	0.000102284
RS09920	hypothetical_protein	4.77403	0.674474	0.552732	1.22026	0.222368	0.300212
RS09925	hypothetical_protein	8.5868	1.43503	0.471923	3.04081	0.0023594	0.004861
RS09930	site-specific_integrase	4230.74	1.95118	0.0822382	23.7259	1.94828e-124	3.92968e-122
RS09935	peptidase	18.9847	0.910318	0.385958	2.35859	0.0183444	0.032571
RS09940	DNA-binding_response_regulator	273.177	0.4949	0.11621	4.25865	2.05664e-05	5.67475e-05
RS09945	two-component_sensor_histidine_kinase	775.137	0.340154	0.0869156	3.91361	9.09248e-05	0.000233327
RS09950	hypothetical_protein	13.2718	-0.240745	0.440286	-0.546792	0.584522	0.667221
RS09955	carbamate_kinase	5.94009	-0.639132	0.513464	-1.24475	0.213225	0.289808
RS09960	ornithine_carbamoyltransferase_12C_catabolic	7.32836	-0.105576	0.492	-0.214585	0.830091	0.870215
RS09965	sensor_histidine_kinase	228.545	1.10468	0.167376	6.60001	4.11142e-11	1.87618e-10
RS09970	hypothetical_protein	16.3739	0.365175	0.416714	0.876319	0.380857	0.480418
RS09975	glycine/betaine_ABC_transporter_ATP-binding_protein	904.501	0.514256	0.135869	3.78494	0.000153745	0.000385701
RS09980	glycine/betaine_ABC_transporter_permease	3099.18	0.271795	0.091257	2.97834	0.00289812	0.00589859
RS09985	hypothetical_protein	2140.49	1.02598	0.109589	9.36204	7.82122e-21	6.41277e-20
RS09990	hypothetical_protein	702.213	1.13237	0.132394	8.55304	1.19885e-17	8.11437e-17
RS09995	membrane_protein	45.7217	0.0163648	0.246485	0.0663925	0.947065	0.964278
RS10000	membrane_protein	158.523	-0.50792	0.179065	-2.83651	0.0045609	0.00905446
RS10005	TetR_family_transcriptional_regulator	85.7874	-0.0811078	0.207938	-0.390058	0.696493	0.76522
RS10010	hypothetical_protein	12.2744	-0.441716	0.417351	-1.05838	0.289882	0.379178
RS10015	hypothetical_protein	1735.6	0.377796	0.0962278	3.92605	8.63511e-05	0.000222156
RS10020	hypothetical_protein	686.833	0.455387	0.108407	4.20071	2.66082e-05	7.23299e-05
RS10025	ArpU_family_transcriptional_regulator	10.2255	0.118695	0.448709	0.264525	0.791375	0.837463
RS10030	hypothetical_protein	4.73302	-0.333426	0.536055	-0.622	0.533942	0.622607
RS10035	hypothetical_protein	8.11765	0.493654	0.485359	1.01709	0.30911	0.401207
RS10040	hypothetical_protein	17.8394	0.12693	0.382801	0.331583	0.740204	0.79848
RS10045	DNA_damage-inducible_protein_DnaD	10.9237	-0.399012	0.443197	-0.900304	0.367959	0.466189
RS10050	hypothetical_protein	1.82193	-0.188694	0.578688	-0.326072	0.74437	0.799464
RS10055	hypothetical_protein	4.49273	0.0346869	0.532892	0.0650918	0.948101	0.964576
RS10060	hypothetical_protein	5.85208	-0.272707	0.524067	-0.520366	0.602808	0.683843
RS10065	hypothetical_protein	2.16056	-0.202785	0.580035	-0.349609	0.726632	0.790516
RS10070	hypothetical_protein	2.32036	0.380712	0.579154	0.657359	0.51095	0.602682
RS10075	hypothetical_protein	94.3872	-1.36411	0.22211	-6.14161	8.16896e-10	3.4043e-09
RS10080	hypothetical_protein	758.964	-0.861776	0.150499	-5.72611	1.0276e-08	3.95547e-08
RS10085	hypothetical_protein	4.97673	1.21021	0.555345	2.17921	0.0293162	0.0493551
RS10090	hypothetical_protein	6.26055	-0.697236	0.512791	-1.35969	0.173929	0.24464
RS10095	phage_repressor_protein	4.5192	-0.827838	0.565662	-1.46349	0.143335	0.206063
RS10100	transcriptional_regulator	3.55702	-0.29388	0.55494	-0.529572	0.596409	0.677722
RS10105	transcriptional_regulator	444.666	0.760793	0.142666	5.33267	9.67803e-08	3.41867e-07
RS10110	hypothetical_protein	114.473	0.743702	0.187791	3.96027	7.48658e-05	0.000194343
RS10115	hypothetical_protein	82.3407	0.471152	0.216271	2.17852	0.0293671	0.0493612
RS10120	hypothetical_protein	102.841	0.307179	0.186633	1.64589	0.0997855	0.150649
RS10125	hypothetical_protein	504.212	0.263341	0.120642	2.18283	0.029048	0.0491103
RS10130	site-specific_integrase	317.117	-0.348889	0.143283	-2.43497	0.014893	0.0272588
RS10135	30S_ribosomal_protein_S4	14042	-1.22954	0.0783314	-15.6966	1.59491e-55	4.40675e-54
RS10140	hypothetical_protein	1436.72	-0.0601253	0.086501	-0.695082	0.487004	0.57952
RS10145	replicative_DNA_helicase	2848.75	-0.0553342	0.0751405	-0.73641	0.461481	0.55737
RS10150	50S_ribosomal_protein_L9	1068.86	-0.0559535	0.0873229	-0.640766	0.521675	0.61244
RS10155	DHH_family_phosphoesterase	2920.59	-0.0841054	0.0752667	-1.11743	0.26381	0.34915
RS10160	tRNA_uridine-5-carboxymethylaminomethyl(34)_synthesis_enzyme_MnmG	1743.76	-0.0130386	0.0961232	-0.135644	0.892102	0.924017
RS10165	membrane_protein	731.546	-0.812521	0.11692	-6.94935	3.66964e-12	1.8321e-11
RS10170	tRNA_2-thiouridine(34)_synthase_MnmA	884.482	-0.737877	0.0928498	-7.947	1.9109e-15	1.15744e-14
RS10175	L-serine_dehydratase2C_iron-sulfur-dependent_subunit_beta	988.031	1.05932	0.104524	10.1346	3.87808e-24	3.79713e-23
RS10180	L-serine_dehydratase2C_iron-sulfur-dependent_subunit_alpha	1666.11	1.00919	0.102452	9.85037	6.82893e-23	6.23256e-22
RS10185	transglycosylase	1150.58	-2.22929	0.234177	-9.51967	1.73723e-21	1.49106e-20
RS10190	peptidoglycan-binding_protein_LysM	293.475	-0.830934	0.190307	-4.36627	1.26384e-05	3.58532e-05
RS10195	transporter	585.778	-0.733648	0.110992	-6.60994	3.84484e-11	1.77461e-10
RS10200	energy-coupling_factor_transporter_ATPase	572.651	-0.429579	0.0925592	-4.64113	3.46512e-06	1.03851e-05
RS10205	energy-coupling_factor_transporter_ATPase	1732.49	0.132321	0.0839587	1.57602	0.11502	0.170585
RS10210	CDP-diacylglycerol--glycerol-3-phosphate_3-phosphatidyltransferase	867.329	0.149143	0.0925855	1.61087	0.107209	0.160178
RS10215	peptidase_M16	1137.31	0.0948361	0.082372	1.15131	0.249603	0.332749
RS10220	peptidase_M16	743.995	0.380675	0.0895755	4.24976	2.13996e-05	5.89658e-05
RS10225	hypothetical_protein	423.263	0.791812	0.112967	7.00921	2.39674e-12	1.21158e-11
RS10230	DNA_replication_and_repair_protein_RecF	1532.08	0.591232	0.0774584	7.6329	2.29525e-14	1.30778e-13
RS10235	sugar_transporter	1235.28	-0.528292	0.15418	-3.42646	0.000611501	0.00140159
RS10240	transcriptional_regulator	550.559	-0.449396	0.14024	-3.20447	0.00135311	0.00291272
RS10245	IMP_dehydrogenase	5553.2	0.0639891	0.0853704	0.749547	0.453528	0.550069
RS10250	arginine_repressor	707.772	0.432363	0.0999501	4.32579	1.51988e-05	4.2756e-05
RS10255	ArcR_family_transcriptional_regulator	693.048	0.421429	0.113909	3.69971	0.000215844	0.000525795
RS10260	hypothetical_protein	114.978	0.930067	0.166315	5.59219	2.24224e-08	8.34428e-08
RS10265	arginine_deiminase	3847.41	-0.906528	0.0832499	-10.8892	1.29722e-27	1.47825e-26
RS10270	GNAT_family_N-acetyltransferase	107.608	0.459948	0.205687	2.23615	0.0253419	0.0435388
RS10275	ornithine_carbamoyltransferase	380.012	0.248962	0.201335	1.23656	0.216252	0.293329
RS10280	arginine-ornithine_antiporter	275.387	0.37514	0.122144	3.0713	0.0021313	0.00441358
RS10285	carbamate_kinase	186.819	0.231121	0.168421	1.37228	0.169975	0.239581
RS10290	tryptophan--tRNA_ligase	2153.63	-0.0638155	0.102612	-0.621911	0.534	0.622607
RS10295	DUF1275_family_protein	448.087	0.555859	0.105501	5.26877	1.37341e-07	4.77615e-07
RS10300	membrane_protein	641.797	0.688102	0.0965362	7.12792	1.01899e-12	5.27e-12
RS10305	ABC-F_family_ATPase	5593.2	0.273498	0.0736347	3.71425	0.000203809	0.000498281
RS10310	copper_ABC_transporter_permease	1511.73	0.291176	0.0789151	3.68974	0.000224483	0.00054618
RS10330	23S_rRNA_(pseudouridine(1915)-N(3))-methyltransferase_RlmH	302.269	0.0399921	0.133564	0.299422	0.764618	0.817294
RS10335	serine_protease	1873.9	0.889586	0.127348	6.98546	2.8392e-12	1.42454e-11
RS10340	chromosome_partitioning_protein_ParB	696.805	0.370469	0.106596	3.47545	0.000509991	0.001181
RS10355	transcriptional_regulator	19.2053	0.520549	0.343837	1.51394	0.130041	0.189107
RS10360	hypothetical_protein	6986.56	3.91832	0.127658	30.6938	6.8848e-207	3.47166e-204
RS10365	hypothetical_protein	70.2972	-0.0337945	0.209374	-0.161407	0.871773	0.906374
RS10370	hypothetical_protein	68.3615	0.62936	0.201301	3.12647	0.00176917	0.00373657
RS10375	hypothetical_protein	33.922	0.66025	0.297873	2.21655	0.0266537	0.0455212
RS10380	hypothetical_protein	14.5134	0.497371	0.391951	1.26896	0.204454	0.280152
RS10385	hypothetical_protein	1.73809	0.014809	0.579532	0.0255533	0.979614	0.983973
RS10390	endonuclease	136.783	0.415077	0.16933	2.45129	0.0142343	0.0261244
RS10395	hypothetical_protein	1495.12	-0.409247	0.198518	-2.06151	0.0392541	0.0644228
RS10400	hypothetical_protein	4.28179	0.540722	0.551428	0.980583	0.326798	0.420927
RS10405	competence_protein_CglA	8.30213	0.774384	0.474649	1.63149	0.102788	0.154603
RS10410	hypothetical_protein	54.054	0.00694685	0.226291	0.0306987	0.97551	0.982819
RS10415	hypothetical_protein	1.01633	-0.168369	0.507499	-0.331762	0.740069	0.79848
RS10420	hypothetical_protein	26.3483	-0.579327	0.32608	-1.77664	0.0756279	0.117159
RS10425	hypothetical_protein	34.5795	-0.711611	0.273384	-2.60297	0.00924206	0.0173407
RS10430	hypothetical_protein	355.495	0.2011	0.119582	1.68168	0.0926308	0.140478
RS10440	hypothetical_protein	27.9308	-0.0111179	0.311787	-0.0356585	0.971555	0.979813
RS10445	hypothetical_protein	2.25801	-0.682256	0.578758	-1.17883	0.238466	0.319593
RS10450	hypothetical_protein	5.11732	-0.271477	0.528128	-0.514037	0.607226	0.68769
RS10455	hypothetical_protein	6.37628	-0.8839	0.520219	-1.69909	0.0893017	0.136249
RS10460	hypothetical_protein	5.29515	0.0619381	0.57244	0.1082	0.913837	0.939933
RS10470	IS3_family_transposase	123.721	0.0397992	0.173206	0.22978	0.818263	0.86005
RS10475	hypothetical_protein	4.25762	-0.0907139	0.550261	-0.164856	0.869057	0.904017
RS10480	site-specific_integrase	167.544	0.222766	0.163233	1.36471	0.172344	0.242581
RS10485	hypothetical_protein	833.159	-0.830847	0.0976113	-8.51179	1.71267e-17	1.15148e-16
RS10490	hypothetical_protein	3.60568	0.341451	0.572346	0.596583	0.550786	0.636275
RS10495	site-specific_integrase	4.35268	0.0236553	0.554916	0.0426285	0.965998	0.97763
RS10500	hypothetical_protein	463.449	-0.893894	0.155786	-5.73797	9.58209e-09	3.69543e-08
RS10505	NINE_protein	15.9673	1.23284	0.484301	2.54561	0.0109086	0.0203351
RS10510	hypothetical_protein	649.743	1.80243	0.142955	12.6083	1.9002e-36	3.01788e-35
RS10515	TetR_family_transcriptional_regulator	78.7024	-0.272891	0.219143	-1.24526	0.213035	0.289808
RS10520	plasmid_mobilization_relaxosome_protein_MobC	2.26082	0.767575	0.579816	1.32383	0.185561	0.258122
RS10525	hypothetical_protein	0.861716	0.243067	0.531328	0.457472	0.647332	0.724165
RS10530	hypothetical_protein	91.2132	0.263407	0.179532	1.46719	0.142325	0.204903
RS10535	hypothetical_protein	165.275	0.483301	0.15704	3.07756	0.00208704	0.00434873
RS10540	ABC_transporter_ATP-binding_protein	45.2965	-0.853775	0.246995	-3.45664	0.000546948	0.00126079
RS10545	hypothetical_protein	1.18876	0.718396	0.562953	1.27612	0.201913	0.2771
RS10550	alpha/beta_hydrolase	9.81666	1.14495	0.457315	2.50364	0.0122923	0.0227255
RS10555	hypothetical_protein	954.159	2.68348	0.13434	19.9752	9.04662e-89	7.01809e-87
RS10560	cell_wall_surface_anchor	53.3305	-0.629821	0.253494	-2.48456	0.012971	0.0238928
RS10565	MarR_family_transcriptional_regulator	1870.01	-0.44466	0.200343	-2.2195	0.0264529	0.0452165
RS10570	hypothetical_protein	0.458842	0.265854	0.439078	0.605483	0.544858	0.631234
RS10575	hypothetical_protein	86.9773	-0.473681	0.201392	-2.35203	0.0186711	0.0330928
RS10585	hypothetical_protein	0.473717	0.0647202	0.448651	0.144255	0.885299	0.919489
RS10590	tetracycline_resistance_protein	70.0715	-0.064107	0.283952	-0.225767	0.821383	0.86288
RS10595	conjugal_transfer_protein	185.011	-1.57173	0.180387	-8.71311	2.95641e-18	2.08499e-17
RS10600	conjugal_transfer_protein	13.4007	0.168072	0.391695	0.429088	0.667859	0.742188
RS10605	hypothetical_protein	83.5969	0.182496	0.208529	0.87516	0.381487	0.480912
RS10610	hypothetical_protein	79.5346	0.298657	0.193127	1.54643	0.122001	0.179617
RS10615	hypothetical_protein	69.6737	0.485424	0.237295	2.04566	0.04079	0.0666181
RS10620	hypothetical_protein	153.437	-0.00542379	0.185163	-0.0292921	0.976632	0.983008
RS10625	peptide_ABC_transporter_permease	1.19398	-0.188479	0.534321	-0.352745	0.724279	0.788382
RS10630	IS3_family_transposase	199.135	0.046315	0.164614	0.281355	0.778438	0.828117
RS10635	hypothetical_protein	2.01081	0.0559981	0.579955	0.096556	0.923079	0.946062
RS10640	IS3_family_transposase	134.245	-0.0819287	0.165388	-0.495371	0.620338	0.699397
RS10645	IS3_family_transposase	155.365	0.525483	0.165809	3.16921	0.00152855	0.00326944
RS10650	transposase	140.292	0.932779	0.287117	3.24878	0.00115903	0.00254381
RS10655	chromosome_partitioning_protein_ParA	12.9109	-0.263887	0.403002	-0.654804	0.512594	0.604268
RS10660	IS3_family_transposase	99.7136	-0.128394	0.197259	-0.650892	0.515116	0.606178
RS10665	IS3_family_transposase	73.3772	0.445005	0.221495	2.00909	0.0445273	0.0720221
RS10670	HXXEE_domain-containing_protein	64.6335	-0.00965629	0.21512	-0.0448879	0.964197	0.976746
RS10675	hypothetical_protein	11.0868	0.144345	0.454934	0.317288	0.751025	0.805326
RS10680	N-acetyltransferase	183.427	-0.2784	0.148535	-1.8743	0.0608887	0.0961726
RS10685	hypothetical_protein	141.105	-0.234266	0.156915	-1.49295	0.135451	0.195426
RS10690	50S_ribosomal_protein_L33	279.327	-0.0995367	0.126624	-0.786084	0.431818	0.531732
RS10695	hypothetical_protein	1.78065	-0.0654571	0.548419	-0.119356	0.904993	0.933694
RS10700	hypothetical_protein	6.65488	0.337253	0.483524	0.697488	0.485497	0.57841
RS10705	CAAX_protease_family_protein	83.3077	-0.530157	0.196868	-2.69295	0.00708219	0.013593
RS10710	hypothetical_protein	178.775	0.139121	0.177853	0.782229	0.43408	0.532891
RS10715	hypothetical_protein	13.4945	0.360236	0.387452	0.929756	0.352497	0.448856
RS10720	membrane_protein	599.179	-0.0304953	0.108053	-0.282225	0.777771	0.828117
RS10725	hypothetical_protein	161.469	0.859109	0.152547	5.63178	1.78361e-08	6.6869e-08
RS10730	hypothetical_protein	19.8439	-0.0293267	0.37352	-0.0785143	0.937419	0.957796
RS10735	hypothetical_protein	3.98742	-0.066145	0.576781	-0.114679	0.908699	0.936559
RS10740	hypothetical_protein	0.424199	-0.273762	0.332722	-0.822796	0.410624	0.50874
RS10745	hypothetical_protein	48.4294	0.410937	0.274999	1.49432	0.135092	0.195046
RS10750	high-affinity_branched-chain_amino_acid_ABC_transporter_ATP-binding_protein_LivG	30.8229	0.184615	0.309979	0.595573	0.551461	0.636689
RS10755	hypothetical_protein	343.986	-0.145582	0.153425	-0.948885	0.342679	0.438568
RS10760	hypothetical_protein	60.5448	0.0461195	0.214493	0.215017	0.829754	0.870215
RS10765	hypothetical_protein	66.1689	-0.197009	0.234302	-0.840834	0.400441	0.499498
RS10770	hypothetical_protein	117.832	-0.136031	0.171407	-0.793618	0.427418	0.526957
RS10775	hypothetical_protein	108.557	0.300453	0.171418	1.75275	0.0796445	0.123004
RS10785	hypothetical_protein	77.1431	0.151442	0.216728	0.698767	0.484698	0.577799
RS10790	hypothetical_protein	72.4958	0.509823	0.196779	2.59084	0.0095741	0.0178971
RS10795	hypothetical_protein	107.511	0.504365	0.177035	2.84895	0.00438637	0.00873376
RS10800	hypothetical_protein	13.1329	-0.777731	0.404236	-1.92395	0.0543607	0.0870203
RS10805	hypothetical_protein	34.3394	0.612575	0.281314	2.17755	0.0294397	0.0494419
[truncated: 18 more rows]

## Sheet: edger
id	function	logFC	logCPM	LR	PValue	FDR
RS00005	chromosomal_replication_initiator_protein_DnaA	0.297904	9.01491	6.95789	0.00834504	0.0276803
RS00010	DNA_polymerase_III_subunit_beta	0.531478	9.73601	14.4281	0.000145613	0.000761884
RS00015	diacylglycerol_kinase	-0.105868	6.25267	0.370179	0.542906	0.725565
RS00020	hypothetical_protein	-0.112894	4.8507	0.288316	0.591301	0.770148
RS00025	GTP-binding_protein_YchF	-0.0611116	9.96372	0.257579	0.611789	0.783205
RS00030	aminoacyl-tRNA_hydrolase	-0.0342223	5.49972	0.0421173	0.837396	0.947401
RS00035	transcription-repair_coupling_factor	-0.145139	9.1059	1.75863	0.184795	0.351943
RS00040	hypothetical_protein	-1.12512	7.58625	84.2688	4.31887e-20	1.2893e-18
RS00045	septum_formation_initiation_protein	-0.706486	7.29324	25.6178	4.16183e-07	3.47366e-06
RS00050	hypothetical_protein	-0.505221	5.28932	8.02293	0.00461889	0.016514
RS00055	serine_hydrolase	-0.219131	8.75268	4.31032	0.0378818	0.101226
RS00060	tRNA(Ile)-lysidine_synthetase	-0.19142	8.34548	2.92613	0.0871561	0.197165
RS00065	hypoxanthine-guanine_phosphoribosyltransferase	-0.273841	9.27737	6.68741	0.00970963	0.0316245
RS00070	cell_division_protein_FtsH	-0.0508187	11.1616	0.256077	0.612828	0.784107
RS00245	CHAP_domain-containing_protein	1.29165	11.8699	128.043	1.09819e-29	5.55202e-28
RS00250	ribose-phosphate_pyrophosphokinase_1	0.0289085	11.0479	0.0601823	0.806208	0.925205
RS00255	aminotransferase_A	-2.57258	9.92062	448.532	1.50547e-99	1.22093e-96
RS00260	DNA_repair_protein_RecO	-2.45238	10.2133	361.718	1.18968e-80	5.78898e-78
RS00265	CPBP_family_intramembrane_metalloprotease	-0.525132	2.43592	2.25094	0.133534	0.273017
RS00270	phosphate_acyltransferase	-0.733633	8.94129	43.1287	5.12558e-11	7.29272e-10
RS00275	acyl_carrier_protein	-0.429388	9.58285	16.0761	6.08467e-05	0.000342685
RS00280	phosphoribosylaminoimidazolesuccinocarboxamide_synthase	-0.419494	2.80469	1.51736	0.218019	0.390461
RS00285	phosphoribosylformylglycinamidine_synthase	0.981109	5.08304	21.1787	4.18381e-06	2.92086e-05
RS00290	amidophosphoribosyltransferase	1.13118	4.45588	16.7668	4.22673e-05	0.000244267
RS00295	phosphoribosylformylglycinamidine_cyclo-ligase	0.796468	4.06806	10.6162	0.00112103	0.00473931
RS00300	phosphoribosylglycinamide_formyltransferase	1.26326	3.35169	21.6493	3.27327e-06	2.34922e-05
RS00305	GNAT_family_acetyltransferase	-0.246385	5.07263	0.922738	0.336757	0.525084
RS00310	bifunctional_phosphoribosylaminoimidazolecarboxamide_formyltransferase/inosine_monophosphate_cyclohydrolase	-0.347981	6.98583	5.95693	0.0146595	0.0451191
RS00315	hypothetical_protein	-1.42954	4.14487	41.6537	1.0896e-10	1.4606e-09
RS00320	peptidoglycan-binding_protein_LysM	-0.470889	9.37507	16.0173	6.27673e-05	0.000353093
RS00325	N-acetylmannosamine-6-phosphate_2-epimerase	-0.566472	2.2774	2.68822	0.101093	0.221885
RS00330	sugar_ABC_transporter_substrate-binding_protein	-1.17106	2.70236	11.8463	0.000577752	0.00263728
RS00335	sugar_ABC_transporter_permease	0.0880165	1.26755	0.0314625	0.859213	0.960272
RS00340	sugar_ABC_transporter_permease	-0.585982	1.35342	1.02944	0.310291	0.496017
RS00345	hypothetical_protein	0.185203	1.30128	0.118858	0.730276	0.875408
RS00350	hypothetical_protein	-0.73579	1.95849	2.78847	0.094945	0.210384
RS00355	N-acetylneuraminate_lyase	-0.747152	2.00874	1.98874	0.158473	0.311946
RS00360	sugar_kinase	-0.774651	2.34347	5.41382	0.019978	0.0589884
RS00365	acetylxylan_esterase	-0.256378	3.45083	0.922638	0.336783	0.525084
RS00370	MurR/RpiR_family_transcriptional_regulator	0.542106	7.18388	12.3439	0.000442429	0.00209566
RS00375	phosphoribosylamine--glycine_ligase	0.654174	3.4244	8.26057	0.00405154	0.0146782
RS00380	5-(carboxyamino)imidazole_ribonucleotide_mutase	1.22137	2.31197	12.892	0.000329982	0.0016073
RS00385	5-(carboxyamino)imidazole_ribonucleotide_synthase	0.75115	3.71775	9.73555	0.00180738	0.00723249
RS00390	hypothetical_protein	0.237194	7.12516	3.14204	0.0762985	0.177556
RS00395	hypothetical_protein	0.493564	6.56125	8.15013	0.00430582	0.0154173
RS00400	adenylosuccinate_lyase	0.513785	8.19509	22.283	2.35274e-06	1.72416e-05
RS00405	transcriptional_regulator	0.00434248	5.1413	0.000591501	0.980597	1
RS00410	Holliday_junction_branch_migration_DNA_helicase_RuvB	-0.112929	8.33687	0.756478	0.384433	0.581308
RS00415	hypothetical_protein	-0.525951	8.00931	15.1299	0.00010036	0.000542614
RS00420	membrane_protein	-0.439782	7.7871	10.3889	0.00126775	0.00525907
RS00425	acyltransferase	-0.280055	10.8166	7.42876	0.00641896	0.0219962
RS00430	bifunctional_acetaldehyde-CoA/alcohol_dehydrogenase	-0.0344738	9.86617	0.0253219	0.873568	0.964552
RS00435	zinc-dependent_alcohol_dehydrogenase	-0.393399	6.38141	3.5146	0.0608305	0.149119
RS00440	threonine_synthase	-0.641232	8.06656	22.2213	2.42969e-06	1.77788e-05
RS00445	MATE_family_efflux_transporter	-0.356823	8.21604	10.5254	0.00117744	0.00494343
RS00450	30S_ribosomal_protein_S10	1.32311	10.6235	157.515	3.94974e-36	3.43204e-34
RS00455	50S_ribosomal_protein_L3	1.3128	11.2523	144.192	3.22541e-33	1.98669e-31
RS00460	50S_ribosomal_protein_L4	1.25538	11.6655	128.028	1.10675e-29	5.55202e-28
RS00465	50S_ribosomal_protein_L23	1.2108	10.754	147.612	5.76835e-34	3.89845e-32
RS00470	50S_ribosomal_protein_L2	1.25602	12.1896	143.309	5.03088e-33	2.9854e-31
RS00475	30S_ribosomal_protein_S19	1.3252	10.8999	152.948	3.93219e-35	3.03715e-33
RS00480	50S_ribosomal_protein_L22	1.25749	11.567	145.855	1.39623e-33	9.05875e-32
RS00485	30S_ribosomal_protein_S3	1.25566	12.1572	132.571	1.12242e-30	5.87279e-29
RS00490	50S_ribosomal_protein_L16	1.24367	11.5641	145.786	1.4458e-33	9.25692e-32
RS00495	50S_ribosomal_protein_L29	1.30541	10.5561	158.512	2.39175e-36	2.11605e-34
RS00500	30S_ribosomal_protein_S17	1.35063	11.3673	159.987	1.13898e-36	1.02635e-34
RS00505	50S_ribosomal_protein_L14	1.27454	11.1071	149.77	1.94633e-34	1.39277e-32
RS00510	50S_ribosomal_protein_L24	1.3591	11.309	163.842	1.63767e-37	1.56253e-35
RS00515	50S_ribosomal_protein_L5	1.28147	12.0962	153.586	2.85198e-35	2.27504e-33
RS00520	30S_ribosomal_protein_S14_type_Z	1.24943	10.4032	109.16	1.49702e-25	6.44644e-24
RS00525	30S_ribosomal_protein_S8	1.40089	11.5281	182.825	1.17126e-41	1.49983e-39
RS00530	50S_ribosomal_protein_L6	1.35693	11.9769	178.303	1.13748e-40	1.31785e-38
RS00535	50S_ribosomal_protein_L18	1.35312	10.8356	153.284	3.32105e-35	2.60649e-33
RS00540	30S_ribosomal_protein_S5	1.28175	11.4111	154.794	1.55292e-35	1.25942e-33
RS00545	50S_ribosomal_protein_L30	1.37424	10.3306	169.186	1.11394e-38	1.10621e-36
RS00550	50S_ribosomal_protein_L15	1.37582	11.3719	180.907	3.07166e-41	3.73667e-39
RS00555	preprotein_translocase_subunit_SecY	1.26254	13.5473	104.408	1.64658e-24	6.56741e-23
RS00560	adenylate_kinase	1.48955	9.3705	187.555	1.08646e-42	1.46853e-40
RS00565	translation_initiation_factor_IF-1	1.14074	11.6092	100.263	1.33437e-23	4.84555e-22
RS00570	50S_ribosomal_protein_L36	1.14573	10.556	106.195	6.68366e-25	2.733e-23
RS00575	30S_ribosomal_protein_S13	1.27269	11.6738	138.387	5.99793e-32	3.31658e-30
RS00580	30S_ribosomal_protein_S11	1.24158	11.9989	143.702	4.1271e-33	2.47932e-31
RS00585	DNA-directed_RNA_polymerase_subunit_alpha	1.3286	12.5089	156.569	6.35696e-36	5.24288e-34
RS00590	50S_ribosomal_protein_L17	1.31796	12.245	125.162	4.69162e-29	2.32953e-27
RS00680	hypothetical_protein	-0.497848	2.94985	3.56732	0.0589273	0.145332
RS00685	hypothetical_protein	-0.552113	4.50374	7.41962	0.00645164	0.0220616
RS00690	hypothetical_protein	-0.683485	4.64053	12.5458	0.000397106	0.00190002
RS00695	hypothetical_protein	-1.30799	4.8325	35.9775	1.99614e-09	2.2801e-08
RS00700	hypothetical_protein	-0.647206	9.74481	21.617	3.32889e-06	2.37862e-05
RS00705	hypothetical_protein	-0.263769	1.41044	0.202662	0.652581	0.81983
RS00710	histidine_phosphatase_family_protein	-1.00134	7.17239	64.4064	1.01228e-15	2.22884e-14
RS00715	D-alanyl-D-alanine_carboxypeptidase	-0.812627	8.15468	50.5431	1.16574e-12	1.90352e-11
RS00720	N-acetylmuramoyl-L-alanine_amidase	-0.589103	8.21986	19.2697	1.13493e-05	7.23799e-05
RS00725	heat-inducible_transcriptional_repressor_HrcA	-0.472732	9.24118	12.0553	0.000516453	0.00238657
RS00730	nucleotide_exchange_factor_GrpE	-0.451916	9.26432	11.4246	0.000724764	0.00323551
RS00735	molecular_chaperone_DnaK	-1.07351	11.8122	80.7417	2.5723e-19	7.36283e-18
RS00740	chaperone_DnaJ	-1.14329	9.95441	105.805	8.13486e-25	3.29869e-23
RS00745	GntR_family_transcriptional_regulator	-0.62771	5.85477	11.6544	0.000640502	0.00289216
RS00750	tRNA_pseudouridine(38-40)_synthase_TruA	0.11091	7.23563	0.835885	0.360576	0.554015
RS00755	hydroxymethylpyrimidine/phosphomethylpyrimidine_kinase	-0.0592116	7.07638	0.243743	0.621516	0.790949
RS00760	membrane_protein	-0.0848279	5.56909	0.249009	0.617774	0.788379
RS00765	TIGR01440_family_protein	0.118968	6.83165	0.632711	0.426363	0.620899
RS00770	mechanosensitive_ion_channel_protein	-0.708321	7.67118	33.0165	9.13784e-09	9.4405e-08
RS00775	trigger_factor	0.313951	12.184	4.22665	0.0397939	0.105409
RS00780	DNA-directed_RNA_polymerase_subunit_delta	0.276095	9.64718	6.04894	0.0139147	0.0431816
RS00785	CTP_synthetase	-1.37216	12.0378	163.198	2.26426e-37	2.11883e-35
RS00790	alpha/beta_hydrolase	0.175964	8.59531	2.82339	0.0928999	0.206794
RS01045	4-(cytidine_5-diphospho)-2-C-methyl-D-erythritol_kinase	-1.42412	8.48492	101.035	9.0377e-24	3.35706e-22
RS01050	transcriptional_regulator	-0.888876	7.61633	48.0979	4.0547e-12	6.46891e-11
RS01055	zinc_ABC_transporter_ATP-binding_protein	-0.814018	8.19682	41.4948	1.18187e-10	1.5756e-09
RS01060	zinc_ABC_transporter_permease	-0.63818	9.20553	33.5244	7.03744e-09	7.42824e-08
RS01075	tyrosine--tRNA_ligase	0.270921	9.6406	6.03434	0.0140302	0.0434845
RS01080	penicillin-binding_protein_1B	0.057868	10.4583	0.304812	0.580882	0.761879
RS01085	DNA-directed_RNA_polymerase_subunit_beta	1.47238	11.8514	147.326	6.66106e-34	4.4401e-32
RS01310	23S_rRNA_(guanosine(2251)-2-O)-methyltransferase_RlmB	-0.443953	7.88701	10.493	0.00119827	0.00501789
RS01315	hypothetical_protein	-0.0726904	7.21502	0.268024	0.60466	0.778174
RS01320	fatty_acid-binding_protein_DegV	0.756623	9.92891	42.6876	6.42174e-11	9.00524e-10
RS01325	transcriptional_regulator	0.619351	3.56066	6.80345	0.00909821	0.0298328
RS01330	50S_ribosomal_protein_L13	0.689015	12.0026	40.4004	2.06898e-10	2.67863e-09
RS01335	30S_ribosomal_protein_S9	0.561238	11.7084	26.851	2.19757e-07	1.89936e-06
RS01340	site-specific_integrase	-0.0705381	8.19785	0.326659	0.567633	0.750367
RS01345	transcriptional_regulator	0.161756	7.05008	1.39252	0.23798	0.415803
RS01350	hypothetical_protein	0.943428	1.91653	5.54636	0.0185192	0.0553187
RS01355	hypothetical_protein	1.40673	3.04119	19.2201	1.1648e-05	7.39939e-05
RS01360	hypothetical_protein	0.378776	1.81757	0.599646	0.438713	0.62852
RS01365	hypothetical_protein	0.498569	1.91786	1.7054	0.191584	0.362511
RS01370	hypothetical_protein	0.515153	2.60081	2.16929	0.140791	0.284506
RS01375	hypothetical_protein	-0.540212	5.94711	8.39109	0.00377065	0.0138371
RS01380	restriction_endonuclease	0.060522	9.33655	0.13402	0.7143	0.864623
RS01385	hypothetical_protein	0.538289	9.83442	11.1359	0.000846708	0.00369846
RS01390	ATP-dependent_DNA_helicase_RecG	0.723727	8.573	30.753	2.93055e-08	2.84632e-07
RS01395	hypothetical_protein	0.621924	0.676121	0.845575	0.357807	0.551152
RS01400	hypothetical_protein	-0.550304	1.59556	1.41529	0.23418	0.411527
RS01405	MutR_family_transcriptional_regulator	-0.413556	5.29259	5.79911	0.0160343	0.0487338
RS01410	MFS_transporter	-0.497815	5.06996	9.52112	0.00203121	0.00802262
RS01415	amino_acid_ABC_transporter_permease	-1.48576	10.0939	175.683	4.24641e-40	4.80536e-38
RS01420	osmoprotectant_ABC_transporter_substrate-binding_protein	-1.30108	9.92044	145.542	1.6349e-33	1.03317e-31
RS01425	choline_ABC_transporter_permease	-1.23142	8.92578	114.434	1.04685e-26	4.71664e-25
RS01430	glycine/betaine_ABC_transporter_ATP-binding_protein	-1.23363	10.1345	83.3809	6.76743e-20	1.99578e-18
RS01515	hypothetical_protein	-0.0600325	5.83886	0.123651	0.725108	0.872497
RS01520	hypothetical_protein	0.176151	7.97706	1.50579	0.219782	0.39304
RS01525	hypothetical_protein	0.214643	5.7425	1.27812	0.25825	0.443826
RS01530	hypothetical_protein	0.201353	6.07759	1.78193	0.181912	0.348224
RS01535	acetyltransferase	-1.01934	7.72591	37.5755	8.79414e-10	1.05077e-08
RS01540	GNAT_family_N-acetyltransferase	-0.862966	7.58629	28.7367	8.2917e-08	7.51348e-07
RS01545	acetyltransferase	-0.914962	8.20139	37.5719	8.81039e-10	1.05077e-08
RS01550	hypothetical_protein	0.0453375	7.03032	0.0886018	0.765962	0.900721
RS01555	DNA-directed_RNA_polymerase_sigma-70_factor	-0.108631	5.69342	0.351806	0.553092	0.735341
RS01560	lipoprotein	-0.257966	2.05439	0.152616	0.696047	0.855079
RS01565	TetR_family_transcriptional_regulator	-0.292603	5.27362	2.00337	0.15695	0.309834
RS01570	antibiotic_ABC_transporter_permease	-0.245831	5.17917	2.20603	0.137472	0.278958
RS01575	glycosyl_transferase_family_2	-0.926404	4.12238	23.3746	1.33326e-06	1.02491e-05
RS01580	hypothetical_protein	0.0296322	6.24803	0.0404703	0.840564	0.949659
RS01585	PadR_family_transcriptional_regulator	-0.211766	4.10623	1.13367	0.286993	0.468532
RS01590	hypothetical_protein	0.87346	9.10682	54.8749	1.28452e-13	2.29797e-12
RS01595	N-acetylglucosamine-6-phosphate_deacetylase	0.618877	8.8638	24.9199	5.97608e-07	4.90381e-06
RS01600	isoprenylcysteine_carboxyl_methyltransferase	0.417517	2.57314	1.76771	0.183666	0.350066
RS01605	glycine--tRNA_ligase_subunit_alpha	0.647542	9.43993	19.5531	9.78428e-06	6.306e-05
RS01610	FMN-dependent_NADH-azoreductase	0.711578	8.46926	31.9645	1.57019e-08	1.5689e-07
RS01615	glycine--tRNA_ligase_subunit_beta	0.590399	10.4467	25.4442	4.55371e-07	3.78776e-06
RS01620	hypothetical_protein	0.350139	8.43204	4.48079	0.0342779	0.0930263
RS01625	membrane_protein	-0.155881	3.89805	0.605209	0.436597	0.627246
RS01630	glycerol_kinase	-0.109856	6.15003	0.303668	0.581592	0.762194
RS01635	alpha-glycerophosphate_oxidase	-0.0226604	5.88065	0.0195107	0.888912	0.977502
RS01640	glycerol_transporter	0.009445	5.31699	0.00266026	0.958865	1
RS01645	NADH_peroxidase	1.0099	6.22447	40.1475	2.35489e-10	3.03146e-09
RS01650	hypothetical_protein	1.07271	6.55016	34.6075	4.03357e-09	4.43056e-08
RS01655	transketolase	0.177532	10.7479	0.80921	0.368354	0.56259
RS01660	bacteriocin_immunity_protein	0.048052	7.43656	0.0684368	0.793627	0.921008
RS01665	3-dehydroquinate_dehydratase	0.0906226	8.8933	0.325346	0.568413	0.75099
RS01670	ABC_transporter_permease	0.154854	10.3788	0.763025	0.382384	0.578749
RS01675	PTS_cellobiose_transporter_subunit_IIC	0.203181	9.6021	0.792981	0.3732	0.567675
RS01680	glutamate_5-kinase	-0.486059	8.88782	20.6596	5.48614e-06	3.73364e-05
RS01685	gamma-glutamyl-phosphate_reductase	-0.28412	10.1806	7.27256	0.00700159	0.0236267
RS01690	16S_rRNA_(cytosine(1402)-N(4))-methyltransferase	-0.109965	8.73906	1.00967	0.314982	0.501867
RS01695	cell_division_protein_FtsL	0.261256	7.18135	4.23408	0.0396201	0.105161
RS01700	penicillin-binding_protein_2X	0.368621	9.69114	12.9812	0.000314636	0.00153717
RS01705	phospho-N-acetylmuramoyl-pentapeptide-transferase	0.526428	8.68502	24.6594	6.84095e-07	5.56656e-06
RS01710	DEAD/DEAH_box_helicase	0.288724	9.58892	7.12945	0.00758279	0.0253768
RS01715	amino_acid_ABC_transporter_substrate-binding_protein	-0.275675	9.17823	5.24048	0.0220672	0.0641835
RS01720	amino_acid_ABC_transporter_permease	-0.075034	9.48619	0.517237	0.472022	0.65926
RS01725	amino_acid_ABC_transporter_ATP-binding_protein	0.0477644	9.83165	0.181438	0.67014	0.835058
RS01730	membrane_protein	-0.168539	6.25164	1.06457	0.302174	0.487796
RS01735	thioredoxin-disulfide_reductase	-0.175433	10.0923	1.85257	0.173484	0.335656
RS01740	nicotinate_phosphoribosyltransferase	0.216043	9.25807	3.58258	0.0583883	0.144295
RS01745	NAD(+)_synthetase	0.275125	9.23121	5.41721	0.0199392	0.0589097
RS01750	aminopeptidase_C	-0.0528831	8.97148	0.234958	0.627871	0.796045
RS01755	penicillin-binding_protein_1A	0.0210376	11.1149	0.0427783	0.836143	0.946423
RS01760	Holliday_junction_resolvase_RecU	-0.06648	8.80444	0.278079	0.597963	0.774059
RS01765	hypothetical_protein	0.439803	4.36598	5.32768	0.0209893	0.0615263
RS01770	cell_cycle_protein_GpsB	-0.246887	9.49782	4.70525	0.0300706	0.0831855
RS01775	RNA_methyltransferase	0.676816	8.54883	38.5051	5.46113e-10	6.71058e-09
RS01780	hypothetical_protein	0.297118	10.4185	8.49854	0.00355432	0.0131623
RS01785	S-ribosylhomocysteine_lyase	-0.350842	9.53641	9.46148	0.00209831	0.00825415
RS01790	ribonuclease_Y	0.773876	10.2255	51.637	6.67705e-13	1.12424e-11
RS01795	multidrug_ABC_transporter_ATP-binding_protein	-1.2533	5.20883	41.143	1.41488e-10	1.86076e-09
RS01800	ABC_transporter_permease	-1.31907	5.32335	59.5957	1.16492e-14	2.32315e-13
RS01805	sensor_histidine_kinase	-1.41202	7.68901	121.758	2.60845e-28	1.26927e-26
RS01810	DNA-binding_response_regulator	-0.976238	7.1217	59.2473	1.39053e-14	2.73941e-13
RS01815	DUF1211_domain-containing_membrane_protein	-1.10078	7.77048	87.4313	8.72578e-21	2.77514e-19
RS01820	guanylate_kinase	0.855764	8.12299	47.4949	5.51486e-12	8.71277e-11
RS01825	DNA-directed_RNA_polymerase_subunit_omega	1.12702	9.06896	66.7595	3.06738e-16	7.11511e-15
RS02840	TlyA_family_rRNA_(cytidine-2-O)-methyltransferase	-0.239369	8.06619	4.00246	0.0454338	0.117346
RS02845	ArgR_family_transcriptional_regulator	-0.238326	7.70109	3.9134	0.0479027	0.122295
RS02850	DNA_repair_protein_RecN	-0.127682	9.36614	1.60456	0.205259	0.375484
RS02855	hypothetical_protein	0.0321631	9.20459	0.0987803	0.753298	0.894721
RS02860	lipase	0.175013	7.95987	2.30764	0.128739	0.266108
RS02865	membrane_protein	0.479905	7.22236	13.5412	0.000233379	0.00116901
RS02870	transcriptional_regulator	-0.929455	12.785	23.8231	1.05606e-06	8.31522e-06
RS02875	hypothetical_protein	-2.74922	8.14239	334.324	1.09925e-74	4.11458e-72
RS02880	dihydroorotate_oxidase	2.47952	7.08654	120.205	5.70559e-28	2.7219e-26
RS02885	peptidoglycan_branched_peptide_synthesis_protein	-0.711127	10.166	42.0024	9.11624e-11	1.24257e-09
RS02890	UDP-N-acetylmuramoylpentapeptide-lysine_N(6)-alanyltransferase	-0.567734	9.55859	24.2068	8.6528e-07	6.90238e-06
RS02895	UDP-N-acetylmuramoylpentapeptide-lysine_N(6)-alanyltransferase	-0.678763	9.73092	33.8922	5.82511e-09	6.24339e-08
RS02900	sugar-phosphatase	-0.521213	9.12691	20.0119	7.69618e-06	5.06076e-05
RS02905	phosphohydrolase	-0.677654	7.97291	24.911	6.00399e-07	4.91842e-06
RS02910	hypothetical_protein	-0.484708	6.55555	9.79558	0.00174932	0.00702701
RS02915	calcium-translocating_P-type_ATPase2C_PMCA-type	-0.76663	10.8409	37.0512	1.15066e-09	1.34918e-08
RS02920	phosphoesterase	-0.459324	7.16926	8.66084	0.00325122	0.0122734
RS02925	fructose-bisphosphatase_class_III	0.259627	6.93531	2.47635	0.115571	0.246363
RS02930	epoxyqueuosine_reductase	0.232743	7.5762	2.69051	0.100948	0.221666
RS02935	peptide_chain_release_factor_2	-0.0913051	8.97384	0.763471	0.382244	0.578719
RS02940	cell_division_ATP-binding_protein_FtsE	0.0210419	8.54491	0.0310177	0.860201	0.960272
RS02945	ABC_transporter_permease	0.0973774	9.75258	0.812903	0.367263	0.561453
RS02955	IS3_family_transposase	-0.174831	6.6416	1.84936	0.173858	0.336112
RS02960	thioesterase	-0.271172	8.83482	6.01619	0.0141752	0.0439021
RS02965	hypothetical_protein	-0.459599	8.31494	8.31326	0.00393567	0.0143346
RS02970	acetoin_reductase	-1.4268	9.87524	98.8944	2.66338e-23	9.3913e-22
RS02975	bifunctional_DnaQ_family_exonuclease/ATP-dependent_helicase	0.893307	8.05446	57.6526	3.12744e-14	6.01507e-13
RS02980	aspartate_aminotransferase	0.683464	9.11693	36.3902	1.61516e-09	1.86241e-08
RS02985	asparagine--tRNA_ligase	1.05848	9.93521	78.6901	7.26591e-19	1.97519e-17
RS02990	membrane_protein	1.53594	9.12807	144.09	3.39569e-33	2.06543e-31
RS02995	hypothetical_protein	1.51266	9.48537	103.148	3.10971e-24	1.22031e-22
RS03000	hypothetical_protein	-0.886451	6.1997	19.1654	1.19866e-05	7.60454e-05
RS03005	RNase_adaptor_protein_RapZ	-0.758981	7.66985	39.5457	3.20476e-10	4.01916e-09
RS03010	YvcK_family_protein	-0.337568	8.00328	9.09095	0.00256878	0.00994405
RS03015	sporulation_protein	-0.193948	8.12983	2.97369	0.0846284	0.192791
RS03020	dipeptidase	-0.12898	9.17966	1.35403	0.244576	0.424644
RS03025	zinc_ABC_transporter_substrate-binding_protein_AdcA	2.05292	9.59314	204.006	2.78984e-46	4.37915e-44
RS03030	50S_ribosomal_protein_L31_type_B	0.712394	13.0696	45.2169	1.76375e-11	2.62458e-10
RS03035	oligoribonuclease	-0.489195	8.81315	12.4403	0.00042016	0.00200245
RS03040	adenosine_deaminase	0.104568	4.815	0.378258	0.538537	0.720517
RS03045	flavodoxin	0.621004	8.49612	15.2102	9.61813e-05	0.000522342
RS03050	chorismate_mutase	0.0238464	5.65574	0.0189153	0.89061	0.978705
RS03055	voltage-gated_chloride_channel_protein	0.123956	8.19039	1.10612	0.292927	0.475921
RS03060	50S_ribosomal_protein_L19	0.304687	11.4253	7.57876	0.005906	0.0205276
RS03070	hypothetical_protein	-0.483481	0.742925	0.575166	0.448213	0.639216
RS03075	transposase	0.78273	6.20083	16.6488	4.49784e-05	0.000259319
RS03090	ABC_transporter_permease	1.36084	6.90985	55.1709	1.10492e-13	1.99131e-12
RS03095	ABC_transporter_ATP-binding_protein	1.39973	6.46744	44.1237	3.0826e-11	4.4776e-10
RS03100	peptide_ABC_transporter_permease	1.19465	7.42731	37.9059	7.42387e-10	9.00862e-09
RS03105	DNA-binding_response_regulator	0.581233	5.3323	9.85733	0.00169156	0.00682043
RS03110	two-component_sensor_histidine_kinase	0.627695	6.71819	18.6435	1.57583e-05	9.72422e-05
RS03115	IS3_family_transposase	1.27586	3.5696	22.5544	2.04276e-06	1.51533e-05
RS03120	CsbD_family_protein	-1.79471	11.023	118.854	1.12747e-27	5.32647e-26
RS03125	rod_shape-determining_protein_RodA	-0.567478	9.22621	27.8313	1.32367e-07	1.16684e-06
RS03130	hydrolase	0.22238	8.14903	3.29652	0.0694269	0.165199
RS03135	DNA_gyrase_subunit_B	0.131023	10.0175	1.66657	0.196718	0.367995
RS03140	septation_ring_formation_regulator_EzrA	0.336932	10.7515	10.4269	0.00124191	0.0051695
RS03145	phosphoserine_phosphatase_SerB	0.0959211	6.10123	0.307159	0.579429	0.760634
RS03150	NUDIX_hydrolase	-1.41321	5.98321	68.2781	1.4199e-16	3.38689e-15
RS03155	hypothetical_protein	-1.56164	5.83207	51.1635	8.49856e-13	1.41623e-11
RS03160	enolase	-0.0267951	13.982	0.051011	0.821313	0.934419
RS03165	endonuclease	1.07796	5.36775	37.8158	7.77491e-10	9.41113e-09
RS03170	3-phosphoshikimate_1-carboxyvinyltransferase	-0.63097	8.24737	31.4446	2.05209e-08	2.03785e-07
RS03175	shikimate_kinase	-0.268009	7.082	4.05523	0.0440348	0.114801
RS03180	LytR_family_transcriptional_regulator	-0.243869	9.1473	4.71345	0.0299275	0.082984
RS03185	RNA_methyltransferase	0.440149	7.1438	12.6486	0.000375849	0.00180541
RS03190	hypothetical_protein	0.766987	5.77351	23.4911	1.25495e-06	9.69297e-06
RS03195	acid_phosphatase/phosphotransferase	0.448083	7.91788	15.9283	6.57863e-05	0.00036795
RS03200	ClbS/DfsB_family_four-helix_bundle_protein	0.604698	7.75128	25.2284	5.0927e-07	4.20731e-06
RS03215	cell_wall_surface_anchor_protein	0.904033	1.47328	3.73555	0.0532661	0.133605
RS03220	IS3_family_transposase	0.96791	7.23861	34.1526	5.09553e-09	5.48559e-08
RS03230	molecular_chaperone_Hsp33	0.957586	5.19282	28.5928	8.93155e-08	8.07824e-07
RS03235	YSIRK-targeted_surface_antigen_transcriptional_regulator	0.509708	8.23761	10.2966	0.00133277	0.00550533
RS03240	cell_wall_surface_anchor_protein	0.614253	7.10002	11.312	0.000770058	0.00341266
RS03245	hypothetical_protein	0.176676	3.79048	0.748303	0.387014	0.58376
RS03250	class_C_sortase	0.298006	4.12981	2.21756	0.136449	0.277395
RS03255	class_C_sortase	0.610127	3.70253	8.18115	0.00423278	0.015223
RS03260	cell_wall_surface_anchor_protein	0.0682398	6.44639	0.221009	0.638272	0.805663
RS03265	class_C_sortase	-0.130948	4.65904	0.557885	0.455114	0.645842
RS03270	hypothetical_protein	-0.783722	0.397885	0.982129	0.321674	0.509195
RS03275	hypothetical_protein	-0.295438	-0.218417	0.0588824	0.808271	0.925205
RS03285	hypothetical_protein	-0.648227	0.701281	0.971998	0.324182	0.510694
RS03290	serine_hydrolase	-0.602455	9.56253	29.0978	6.88157e-08	6.34199e-07
RS03295	ABC_transporter_ATPase	1.13841	5.07094	34.4038	4.47847e-09	4.86434e-08
RS03300	antibiotic_ABC_transporter_permease	1.16429	4.9875	26.8422	2.20758e-07	1.90126e-06
RS03305	multidrug_ABC_transporter_permease	0.503093	5.0753	9.12659	0.00251921	0.0097677
RS03310	hypothetical_protein	-0.585238	2.74205	4.52569	0.0333896	0.0909199
RS03315	hypothetical_protein	-0.25694	3.8025	1.59124	0.207149	0.376415
RS03320	SDR_family_oxidoreductase	-0.53086	3.86687	5.40109	0.0201242	0.059312
RS03325	acyl_carrier_protein	0.027513	3.0269	0.0121101	0.912373	0.99633
RS03330	beta-hydroxyacyl-ACP_dehydratase	-0.17752	3.84452	0.580727	0.446027	0.636659
RS03335	ABC_transporter_ATP-binding_protein	0.0352743	4.59127	0.0292626	0.864174	0.960281
RS03340	ABC_transporter_permease	0.284146	4.86873	2.4832	0.115068	0.245903
RS03345	hypothetical_protein	0.131118	6.39916	0.706507	0.400606	0.598965
RS03350	hypothetical_protein	0.0708775	5.26872	0.208567	0.647893	0.815692
RS03355	hypothetical_protein	0.155879	6.66421	1.11847	0.290249	0.472991
RS03360	hypothetical_protein	0.0125942	6.40021	0.00700477	0.933299	1
RS03365	hypothetical_protein	0.077097	6.11327	0.231661	0.630295	0.797663
RS03370	hypothetical_protein	2.95991	2.83182	35.0688	3.1826e-09	3.54383e-08
RS03375	hypothetical_protein	2.36097	3.5378	61.9571	3.51018e-15	7.20697e-14
RS03380	peptidase_S8	2.32566	5.353	63.9687	1.26414e-15	2.70982e-14
RS03390	hypothetical_protein	2.01415	5.74788	71.1887	3.24644e-17	8.18507e-16
RS03395	peptidase_M13	-1.16544	1.96714	5.81479	0.0158919	0.0483615
RS03400	peptidase_M13	-0.451218	1.84999	1.35382	0.244611	0.424644
RS03405	alpha/beta_hydrolase	-0.383358	2.3266	1.41609	0.234048	0.411444
RS03420	alpha/beta_hydrolase	0.0273482	2.66578	0.00850695	0.926513	1
RS03425	ABC_transporter_permease	-0.603439	2.76644	4.60214	0.0319321	0.0873422
RS03430	permease	-1.24574	3.00037	20.7605	5.20449e-06	3.56189e-05
RS03440	hypothetical_protein	-0.827612	1.68266	3.85736	0.0495281	0.125827
RS03445	multidrug_ABC_transporter_ATP-binding_protein	-1.34011	2.74663	19.2621	1.13946e-05	7.25733e-05
RS03450	hypothetical_protein	-0.915425	7.93057	59.189	1.43236e-14	2.81042e-13
RS03455	DNA-entry_nuclease	0.115571	4.92847	0.173127	0.677348	0.839311
RS03460	cytochrome_o_ubiquinol_oxidase	-0.174796	8.57644	2.18022	0.139795	0.282845
RS03465	ABC_transporter_ATP-binding_protein	-0.336132	8.52126	3.03221	0.0816268	0.18674
RS03470	iron_export_ABC_transporter_permease_subunit_FetB	-0.454871	9.86766	5.83977	0.0156678	0.0477623
RS03475	phosphate_ABC_transporter_ATPase	-0.495962	5.66486	10.9345	0.000943895	0.00406459
RS03480	LysR_family_transcriptional_regulator	0.0380994	7.67762	0.0567713	0.811674	0.928227
RS03485	membrane_protein	0.578946	5.06527	10.496	0.00119633	0.00501408
RS03490	lactate_dehydrogenase	0.465189	5.41512	6.83995	0.00891412	0.029328
RS03495	glucuronide_permease	-1.00848	1.48106	4.85379	0.0275854	0.0773118
RS03500	2-dehydro-3-deoxygluconokinase	-0.375648	3.34344	2.59915	0.106921	0.23237
RS03505	beta-glucuronidase	-0.479016	5.21112	8.54261	0.00346928	0.012923
RS03510	GntR_family_transcriptional_regulator	-0.925134	8.4244	55.2972	1.03618e-13	1.89551e-12
RS03515	2-dehydro-3-deoxyphosphooctonate_aldolase	-0.161558	2.89989	0.343362	0.557895	0.739907
RS03520	uronate_isomerase	-0.776079	3.9609	8.16459	0.00427162	0.0153287
RS03525	mannonate_dehydratase	-0.403159	3.60256	1.27389	0.259039	0.443826
RS03530	dioxygenase	-0.148746	3.84378	0.348572	0.554923	0.736768
RS03535	haloacid_dehalogenase	-0.358242	3.4703	2.42676	0.119279	0.252369
RS03540	beta-hexosamidase	-0.422482	5.05185	5.98463	0.014431	0.0445285
RS03545	dipeptidase	-1.1738	9.50692	58.8746	1.68045e-14	3.28397e-13
RS03550	catabolite_control_protein_A	0.75611	9.79578	32.9539	9.43693e-09	9.70826e-08
RS03555	alpha-amylase	-0.351973	7.87364	5.90614	0.0150882	0.0462339
RS03560	glycosyl_transferase_family_1	-0.279219	9.14447	6.38851	0.0114861	0.0364589
RS03565	12C2-diacylglycerol_3-glucosyltransferase	-0.0900774	9.83752	0.733813	0.39165	0.589656
RS03570	threonine--tRNA_ligase	0.290887	10.3009	4.1696	0.0411556	0.108309
RS03575	DNA-binding_response_regulator	0.825841	3.67752	10.8246	0.00100162	0.00427909
RS03580	hypothetical_protein	-0.890057	7.37278	46.9409	7.31614e-12	1.13017e-10
RS03585	peptidase	-0.160867	10.6788	1.83777	0.175212	0.337835
RS03590	glutamine_ABC_transporter_permease	-1.08248	9.51857	14.3594	0.000151023	0.000787849
RS03595	glutamine_ABC_transporter_permease	-0.993221	8.93374	8.63673	0.00329452	0.0123888
RS03600	amino_acid_ABC_transporter_substrate-binding_protein	-1.21441	9.06655	16.4744	4.93114e-05	0.000281631
RS03605	arginine_ABC_transporter_ATP-binding_protein	-1.30264	8.96866	20.3155	6.56657e-06	4.39517e-05
RS03610	DNA-binding_response_regulator	-0.140997	8.23261	1.68952	0.193664	0.365118
RS03615	cell_wall_metabolism_sensor_histidine_kinase_VicK	-0.0543742	9.12927	0.241147	0.623379	0.792622
RS03620	metallo-hydrolase	0.0354348	8.56225	0.0994121	0.752536	0.894441
RS03625	hypothetical_protein	0.218473	8.14922	3.92272	0.0476376	0.121809
RS03630	ribonuclease_3	-0.195145	8.2184	2.77587	0.0956944	0.211851
RS03635	chromosome_segregation_protein_SMC	0.273659	10.0083	7.07378	0.00782202	0.0261056
RS03640	haloacid_dehalogenase	-0.385178	7.62309	6.86719	0.00877925	0.0289234
RS03645	haloacid_dehalogenase	-0.139207	8.02146	1.54045	0.214551	0.386063
RS03650	signal_recognition_particle-docking_protein_FtsY	-0.130492	9.03514	1.46838	0.225601	0.400476
RS03655	group_II_intron_reverse_transcriptase/maturase	-1.15923	5.64255	48.0821	4.08735e-12	6.49969e-11
RS03660	phosphate_ABC_transporter_substrate-binding_protein	-1.48936	9.88614	143.092	5.61304e-33	3.29073e-31
RS03665	ABC_transporter_permease	-1.77305	9.95542	132.05	1.45883e-30	7.55179e-29
RS03670	hypothetical_protein	-2.11995	7.41577	254.001	3.48542e-57	7.37394e-55
RS03675	N52CN10-methylene_tetrahydromethanopterin_reductase	0.758278	5.48059	17.9062	2.32069e-05	0.000139413
RS03680	S1_RNA-binding_protein	0.23709	8.99406	4.66543	0.0307757	0.0847986
RS03685	SprT_family_protein	0.225512	6.99612	2.27063	0.131846	0.27036
RS03690	phage_shock_protein_C	-2.75889	10.415	376.783	6.24115e-84	3.79618e-81
RS03695	HPr_kinase/phosphorylase	-0.509155	9.65683	20.0686	7.47131e-06	4.93868e-05
RS03700	prolipoprotein_diacylglyceryl_transferase	-0.51823	9.23344	15.9542	6.48929e-05	0.00036337
RS03705	DUF948_domain_containing_protein	-0.589847	8.85297	21.1884	4.16273e-06	2.91032e-05
RS03710	hypothetical_protein	-0.598687	10.1861	9.3279	0.00225691	0.00882099
RS03715	hypothetical_protein	1.31434	11.5925	59.4821	1.23413e-14	2.44116e-13
RS03720	peptidase_U32	1.07685	6.74437	20.4365	6.16425e-06	4.16023e-05
RS03725	collagenase-like_protease	1.05717	7.85904	15.6708	7.53785e-05	0.000416809
RS03730	hypothetical_protein	0.0787973	7.57421	0.421876	0.516002	0.699017
RS03735	hypothetical_protein	-0.841047	6.00415	19.9542	7.93213e-06	5.20185e-05
RS03740	manganese_transporter	-0.806069	9.10398	36.0982	1.87618e-09	2.14812e-08
RS03745	bifunctional_diaminohydroxyphosphoribosylaminopyrimidine_deaminase/5-amino-6-(5-phosphoribosylamino)uracil_reductase	-1.23792	6.41938	26.7156	2.35705e-07	2.02282e-06
RS03750	riboflavin_synthase	-1.19619	5.11896	21.0822	4.40004e-06	3.05429e-05
RS03755	bifunctional_32C4-dihydroxy-2-butanone-4-phosphate_synthase/GTP_cyclohydrolase_II	-1.16015	6.6378	28.8353	7.88034e-08	7.18085e-07
RS03760	62C7-dimethyl-8-ribityllumazine_synthase	-1.1423	6.00462	22.8516	1.75003e-06	1.30809e-05
RS03765	lysine--tRNA_ligase	0.926023	10.3386	79.9784	3.78527e-19	1.05252e-17
RS03770	haloacid_dehalogenase	0.725851	8.1116	31.6501	1.84601e-08	1.84072e-07
RS03775	histidine_phosphatase_family_protein	-0.313439	6.68888	5.26237	0.0217913	0.0634948
RS03780	aminoacyl-tRNA_deacylase	-0.104334	5.82485	0.392445	0.531017	0.712808
RS03785	epimerase	0.24272	5.88251	1.39874	0.236934	0.414454
RS03790	N-acetylmuramoyl-L-alanine_amidase	0.681092	8.96452	29.8294	4.71787e-08	4.43188e-07
RS03795	ECF_transporter_S_component	-0.314797	7.83773	7.39827	0.00652868	0.0222781
RS03800	hypothetical_protein	-0.148853	9.35586	1.0377	0.308357	0.494387
RS03805	oligoendopeptidase_F	-0.92248	9.29037	63.669	1.47182e-15	3.11386e-14
RS03810	phosphoenolpyruvate_carboxylase	0.664292	10.569	30.534	3.28063e-08	3.17367e-07
RS03815	cell_division_protein	0.173894	8.78895	2.28903	0.130291	0.268466
RS03820	elongation_factor_Tu	0.186447	15.0248	2.28069	0.130994	0.269406
RS03825	triose-phosphate_isomerase	-0.122819	12.1979	0.818992	0.365475	0.559665
RS03830	22C3-bisphosphoglycerate-dependent_phosphoglycerate_mutase	0.030013	13.0679	0.0735429	0.786246	0.916652
RS03835	penicillin-binding_protein_2B	-1.03769	9.98223	101.018	9.11512e-24	3.36016e-22
RS03840	recombination_protein_RecR	-0.725035	8.74721	41.297	1.30772e-10	1.72918e-09
RS03845	D-alanine--D-alanine_ligase	0.308501	10.1259	9.54967	0.00199985	0.00791315
RS03850	UDP-N-acetylmuramoyl-tripeptide--D-alanyl-D-alanine_ligase	-0.514016	9.38149	25.4483	4.54395e-07	3.7861e-06
RS03855	MFS_transporter	2.08232	7.19639	108.299	2.31096e-25	9.69409e-24
RS03860	membrane_protein	0.849004	5.88689	30.3767	3.55784e-08	3.41468e-07
RS03865	cell_surface_protein	0.47929	5.00066	6.2937	0.0121168	0.0381374
RS03870	peptide_chain_release_factor_3	0.769716	9.1343	46.2504	1.04067e-11	1.58743e-10
RS03875	helicase	-0.694874	7.30141	33.3288	7.78217e-09	8.10878e-08
RS03880	ABC_transporter_ATP-binding_protein	1.34067	6.17702	24.5181	7.3615e-07	5.96895e-06
RS03885	ABC_transporter_permease	1.53449	6.24355	40.3226	2.15308e-10	2.77901e-09
RS03890	hypothetical_protein	1.01892	6.99641	14.6033	0.000132681	0.000697975
RS03895	RNA_helicase	0.624399	11.6229	16.0063	6.31332e-05	0.000354741
RS03900	hypothetical_protein	0.508438	5.99571	11.2046	0.000815966	0.00357702
RS03905	methyltransferase	0.172445	6.13015	1.1584	0.281799	0.46253
RS03910	1-acyl-sn-glycerol-3-phosphate_acyltransferase	0.0692436	8.88422	0.357421	0.549942	0.732553
RS03915	competence_protein_CelA	0.368654	0.590325	0.274264	0.600486	0.775288
RS03920	DNA_internalization-related_competence_protein_ComEC/Rec2	0.098454	3.51947	0.12688	0.72169	0.870104
RS03925	haloacid_dehalogenase	-0.512677	6.02734	10.3648	0.00128443	0.00532373
RS03930	LacI_family_transcriptional_regulator	-0.749754	6.90713	32.6205	1.12028e-08	1.14282e-07
RS03935	hypothetical_protein	-0.303321	8.32192	6.43614	0.0111821	0.0355635
RS03940	methyltransferase	-0.0391178	5.22073	0.0503378	0.822477	0.934519
RS03945	DNA_polymerase_III_subunit_delta	0.2357	7.94303	3.77482	0.0520294	0.131043
RS03950	superoxide_dismutase_[Mn/Fe]	-0.195696	11.3634	2.15922	0.141717	0.285664
RS03955	transcription_antiterminator_BglG	0.844243	3.20364	12.0748	0.000511073	0.0023662
RS03960	PTS_beta-glucoside_transporter_subunit_EIIBCA	1.25614	3.55862	28.8428	7.84957e-08	7.16623e-07
RS03965	6-phospho-beta-glucosidase	0.275226	5.58953	2.47392	0.115749	0.2466
RS03970	PucR_family_transcriptional_regulator	-0.658528	6.77037	18.9037	1.37486e-05	8.62119e-05
RS03975	glycerate_kinase	1.15252	3.26023	21.1497	4.24759e-06	2.95691e-05
RS03980	gluconate_proton_symporter	0.373529	3.84563	1.01139	0.314571	0.501376
RS03985	hypothetical_protein	0.139397	7.23734	1.01295	0.314198	0.500946
RS03995	tRNA_preQ1(34)_S-adenosylmethionine_ribosyltransferase-isomerase_QueA	0.351941	8.6654	6.53454	0.0105799	0.0338697
RS04000	membrane_protein	-0.789581	8.46766	6.24928	0.0124244	0.0389543
RS04005	glucosamine-6-phosphate_deaminase	0.106772	9.05095	0.483737	0.486734	0.670189
RS04010	glutathione-dependent_reductase	-0.973465	7.18438	55.209	1.08372e-13	1.96768e-12
RS04015	16S_rRNA_pseudouridine(516)_synthase	0.256577	5.3168	2.55659	0.109835	0.237854
RS04020	MFS_transporter	1.75145	11.0883	7.39202	0.00655139	0.0223399
RS04025	competence_protein_CoiA	-0.860208	4.04487	17.9158	2.30892e-05	0.000138878
RS04030	oligoendopeptidase_F	-0.0740653	9.36812	0.344204	0.557413	0.73967
RS04035	haloacid_dehalogenase	0.308599	6.44748	4.63842	0.0312638	0.0859005
RS04040	O-methyltransferase	0.128367	8.33893	0.904291	0.341634	0.530099
RS04045	foldase	-0.392357	10.4097	13.0916	0.000296617	0.00145792
RS04050	hypothetical_protein	0.24943	7.65674	4.01888	0.0449936	0.116519
RS04055	alanine--tRNA_ligase	0.367234	10.2631	8.36171	0.0038321	0.0140309
RS04060	membrane_protein	0.263069	7.37523	3.72447	0.0536208	0.134189
RS04065	glycosyl_transferase	-1.1136	5.79328	40.6985	1.77626e-10	2.31104e-09
RS04070	hypothetical_protein	-0.121202	0.434611	0.0254249	0.873313	0.964552
RS04075	hypothetical_protein	0.281234	1.72858	0.433929	0.510067	0.69368
RS04080	transcriptional_regulator	0.70172	1.20093	1.77263	0.183057	0.349131
RS04085	membrane_protein	-0.307798	3.15694	1.55287	0.212713	0.38421
RS04090	energy-coupled_thiamine_transporter_ThiT	0.766028	7.40208	26.3265	2.88307e-07	2.44408e-06
RS04095	ribonucleoside-diphosphate_reductase	-0.860436	11.3519	70.5694	4.44347e-17	1.10316e-15
RS04100	ribonucleoside-diphosphate_reductase_subunit_alpha	-0.873465	12.588	56.2702	6.31662e-14	1.18218e-12
RS04105	NrdH-redoxin	-0.832357	9.84184	46.9572	7.25543e-12	1.12436e-10
RS04110	phosphocarrier_protein_HPr	0.547263	11.9447	14.1512	0.000168687	0.000869522
RS04115	phosphoenolpyruvate--protein_phosphotransferase	0.487743	13.2845	15.8324	6.92054e-05	0.000384861
RS04120	NADP-dependent_glyceraldehyde-3-phosphate_dehydrogenase	-0.144611	11.385	1.90784	0.167204	0.326621
RS04125	polysaccharide_deacetylase	0.568646	7.66967	18.8135	1.44146e-05	9.01563e-05
RS04130	RNA_helicase	-0.251965	9.00162	5.38304	0.0203335	0.0598927
RS04135	uridine_kinase	0.837942	8.48893	33.4914	7.1581e-09	7.53924e-08
RS04140	hypothetical_protein	-0.390054	7.97306	7.26151	0.0070448	0.0237561
RS04145	DNA_polymerase_III_subunit_gamma/tau	0.0215965	9.79807	0.0388334	0.843779	0.951525
RS04150	membrane_protein	0.151934	5.76704	0.908043	0.340634	0.529054
RS04155	bifunctional_biotin--[acetyl-CoA-carboxylase]_synthetase/biotin_operon_repressor	-1.40837	6.91133	89.6987	2.77332e-21	9.05702e-20
RS04160	S-adenosylmethionine_synthase	0.219839	9.36997	4.11448	0.0425176	0.111592
RS04165	hypothetical_protein	0.206693	5.40862	1.37763	0.240505	0.41931
RS04170	hypothetical_protein	-0.695586	3.33683	7.59524	0.00585225	0.0203698
RS04175	hypothetical_protein	-0.392573	2.64651	1.70275	0.191928	0.36297
RS04180	hypothetical_protein	0.460017	2.13464	1.69856	0.192477	0.363866
RS04185	ABC_transporter_permease	-0.00185782	2.08578	2.60514e-05	0.995928	1
RS04190	ABC_transporter_ATP-binding_protein	0.926787	3.10577	10.4251	0.00124315	0.00517022
RS04195	ABC_transporter	0.809473	2.43085	4.34574	0.0371017	0.0995471
RS04200	thiaminase_II	0.4352	2.4004	1.10944	0.292203	0.475235
RS04205	bifunctional_hydroxymethylpyrimidine_kinase/phosphomethylpyrimidine_kinase	0.635317	2.75139	4.25094	0.0392285	0.104309
RS04210	hydroxyethylthiazole_kinase	0.983586	2.53911	10.0914	0.0014896	0.00607575
RS04215	thiamine_phosphate_synthase	0.616492	2.97097	4.72489	0.0297291	0.0825225
RS04220	UDP-N-acetylglucosamine_1-carboxyvinyltransferase	0.43758	9.69545	16.3794	5.18462e-05	0.00029438
RS04225	RimJ/RimL_family_protein_N-acetyltransferase	-0.00326197	6.77896	0.000659841	0.979507	1
RS04230	hypothetical_protein	0.0695555	8.10189	0.30721	0.579398	0.760634
RS04235	methionine_aminopeptidase	0.0495239	8.28079	0.198694	0.655777	0.822214
RS04240	hypothetical_protein	0.310061	8.72836	7.61731	0.00578106	0.0201653
RS04245	sugar_translocase	-0.131741	4.91236	0.329249	0.566102	0.749157
RS04250	queuosine_transporter_QueT	0.0903129	10.7074	0.725943	0.394201	0.59313
RS04255	DNA_ligase_(NAD(+))_LigA	0.135679	8.71072	1.64904	0.199089	0.367995
RS04260	diacylglycerol_kinase	0.28692	7.71868	5.76726	0.0163274	0.049532
RS04265	type_I_pullulanase	0.347104	9.49922	11.2271	0.000806098	0.00354014
RS04270	glycogen-branching_enzyme	-0.127548	6.61843	0.517368	0.471966	0.65926
RS04275	glucose-1-phosphate_adenylyltransferase	-0.324571	5.73072	3.68313	0.0549655	0.136879
RS04280	glucose-1-phosphate_adenylyltransferase_subunit_GlgD	-0.708593	5.61533	8.56619	0.00342463	0.012799
RS04285	starch_synthase	-0.308868	6.22007	4.05771	0.0439701	0.114785
RS04290	F0F1_ATP_synthase_subunit_C	-0.723748	10.7583	20.0137	7.68906e-06	5.06076e-05
RS04295	ATP_synthase_subunit_A	-0.599105	11.8585	15.2036	9.65186e-05	0.000523589
RS04300	ATP_synthase_subunit_B	-0.564269	10.8674	17.3055	3.1826e-05	0.000187036
RS04305	F0F1_ATP_synthase_subunit_delta	-0.605161	11.3106	18.6054	1.60764e-05	9.90223e-05
RS04310	ATP_synthase_subunit_alpha	-0.599412	12.8267	23.8825	1.024e-06	8.07581e-06
RS04315	ATP_synthase_subunit_gamma	-0.552285	12.1146	17.7561	2.5111e-05	0.000150111
RS04320	ATP_synthase_subunit_beta	-0.571025	12.813	18.7528	1.48803e-05	9.25927e-05
RS04325	F0F1_ATP_synthase_subunit_epsilon	-0.420462	11.8897	8.99781	0.00270304	0.0103648
RS04330	membrane_protein	-0.359529	5.80147	4.95957	0.0259466	0.0737909
RS04335	UDP-N-acetylglucosamine_1-carboxyvinyltransferase	-0.373323	9.68719	12.9966	0.000312057	0.0015261
RS04340	DNA-directed_RNA_polymerase_subunit_beta	-0.33669	8.29706	7.20304	0.00727802	0.024424
RS04345	DNA-entry_nuclease	-0.189279	7.95223	2.50738	0.113314	0.242831
RS04350	phenylalanine--tRNA_ligase_subunit_alpha	0.250759	8.60676	4.25752	0.0390769	0.103963
RS04355	GNAT_family_N-acetyltransferase	0.317393	8.0343	7.51435	0.00612093	0.0211687
RS04360	phenylalanine--tRNA_ligase_subunit_beta	0.473103	9.99536	15.1662	9.84475e-05	0.000532865
RS04365	hypothetical_protein	-1.39505	7.44306	85.1708	2.73674e-20	8.37546e-19
RS04370	ATP-dependent_nuclease_subunit_B	-0.0300741	8.23817	0.0698489	0.791557	0.919703
RS04375	helicase-exonuclease_AddAB_subunit_AddA	-0.0990795	9.1905	0.92787	0.335417	0.523625
RS04380	magnesium_transporter	0.0820327	8.20961	0.564805	0.452331	0.643232
RS04385	tRNA_uridine-5-carboxymethylaminomethyl(34)_synthesis_GTPase_MnmE	0.0103034	8.62937	0.00807825	0.928383	1
RS04390	multidrug_ABC_transporter_ATP-binding_protein	-0.131173	8.39261	1.55042	0.213073	0.384391
RS04395	pyruvate_dehydrogenase_E1_subunit_alpha	0.185225	11.8582	1.9086	0.167119	0.326586
RS04400	pyruvate_dehydrogenase_subunit_beta	0.181631	11.2143	1.43191	0.231453	0.407839
RS04405	branched-chain_alpha-keto_acid_dehydrogenase_subunit_E2	-0.0603576	11.0283	0.124408	0.724302	0.872331
RS04410	dihydrolipoyl_dehydrogenase	-0.0694781	12.0723	0.164626	0.684933	0.846395
RS04415	lipoate--protein_ligase_A	0.791292	8.60053	18.4609	1.73428e-05	0.000106018
RS04420	group_II_intron_reverse_transcriptase/maturase	-1.37982	5.75925	46.6963	8.2886e-12	1.27231e-10
RS04425	glutamine_amidotransferase	-0.00599965	8.22256	0.00253961	0.959808	1
RS04430	UDP-N-acetylmuramyl_peptide_synthase	-0.585794	8.86309	21.0689	4.43053e-06	3.06989e-05
RS04435	membrane_protein	-0.133654	8.65286	1.53991	0.214631	0.386063
RS04440	hypothetical_protein	0.00842738	8.48221	0.00637339	0.93637	1
RS04445	phosphoglucosamine_mutase	0.0662725	10.0706	0.27289	0.6014	0.775619
RS04450	hypothetical_protein	-0.490308	5.04872	7.21939	0.00721202	0.0242322
RS04455	hypothetical_protein	-0.84066	6.21312	32.2689	1.34247e-08	1.3581e-07
RS04460	coproporphyrinogen_III_oxidase	0.155088	8.37925	1.67532	0.195547	0.367671
RS04465	acyl-ACP_thioesterase	0.809197	7.27589	40.0202	2.51347e-10	3.19335e-09
RS04470	haloacid_dehalogenase	0.424533	7.66237	8.49368	0.00356382	0.0131875
RS04475	membrane_protein	0.509597	8.21989	21.4506	3.63061e-06	2.5753e-05
RS04480	type_II_CRISPR_RNA-guided_endonuclease_Cas9	-4.73026	5.88899	422.967	5.51739e-94	3.83538e-91
RS04485	subtype_II_CRISPR-associated_endonuclease_Cas1	0.776126	5.50771	19.9146	8.09811e-06	5.28222e-05
RS04490	CRISPR-associated_endonuclease_Cas2	0.651917	3.7126	8.61331	0.00333716	0.0125298
RS04495	type_II-A_CRISPR-associated_protein_Csn2	0.272319	5.82416	3.53197	0.0601961	0.147787
RS04505	nucleoside-diphosphate_kinase	-2.70782	10.8221	518.809	7.68425e-115	1.24638e-111
RS04510	elongation_factor_4	-0.154184	10.2696	2.04655	0.152552	0.303606
RS04515	hypothetical_protein	0.940213	5.26635	21.0086	4.57228e-06	3.14692e-05
RS04520	phosphohydrolase	-1.11352	6.89122	69.5233	7.55155e-17	1.86527e-15
RS04525	N-acetyltransferase	-1.02445	6.8102	64.4283	1.00111e-15	2.21427e-14
RS04530	peptide-methionine_(R)-S-oxide_reductase	-1.19302	7.34617	74.4575	6.19567e-18	1.62087e-16
RS04535	haloacid_dehalogenase	-1.50402	8.36858	116.011	4.72734e-27	2.14984e-25
RS04540	hypothetical_protein	-0.755427	6.68418	27.717	1.40426e-07	1.23342e-06
RS04545	hypothetical_protein	-0.455034	7.48884	13.6354	0.000221958	0.00111575
RS04550	TVP38/TMEM64_family_protein	-0.492397	7.46418	12.3199	0.000448144	0.00211716
RS04555	hypothetical_protein	-0.323616	10.3366	7.52187	0.00609542	0.021122
RS04560	multidrug_ABC_transporter_ATP-binding_protein	-0.146224	9.4766	1.54281	0.2142	0.385744
RS04565	GntR_family_transcriptional_regulator	-0.0672519	8.79377	0.235703	0.627327	0.795993
RS04570	DNA_polymerase_III_subunit_alpha	-0.394694	7.97683	11.5072	0.000693286	0.00310638
RS04575	6-phosphofructokinase	0.230093	11.4882	3.20993	0.0731926	0.171724
RS04580	pyruvate_kinase	0.226357	12.7236	2.83656	0.092141	0.205386
RS04585	signal_peptidase_I	0.0602088	8.66125	0.264325	0.607164	0.780158
RS04590	glutamine--fructose-6-phosphate_aminotransferase	-3.23425	11.8436	267.202	4.62007e-60	1.12406e-57
RS04595	hypothetical_protein	2.49129	7.53487	255.718	1.47177e-57	3.25529e-55
RS04600	amino_acid_ABC_transporter_permease	-0.234963	6.99662	3.1337	0.0766897	0.178212
RS04605	amino_acid_ABC_transporter_ATP-binding_protein	0.0661855	7.57186	0.250439	0.616766	0.788092
RS04610	glutamine_ABC_transporter_substrate-binding_protein	0.0835188	8.6203	0.493939	0.482176	0.668071
RS04615	30S_ribosomal_protein_S20	-0.253854	12.187	4.35162	0.0369738	0.0992906
RS04620	type_I_pantothenate_kinase	-0.103947	7.07832	0.418821	0.517526	0.700496
RS04625	methyltransferase	1.22521	7.05417	86.7086	1.2575e-20	3.94773e-19
RS04630	cytidine_deaminase	1.08643	6.83767	56.6074	5.32099e-14	1.00356e-12
RS04635	BMP_family_ABC_transporter_substrate-binding_protein	0.599177	10.123	10.8568	0.000984332	0.00421634
RS04640	sugar_ABC_transporter_ATP-binding_protein	1.8704	8.99373	175.054	5.82609e-40	6.44313e-38
RS04645	ABC_transporter_permease	1.9747	9.19413	164.961	9.32866e-38	9.07865e-36
RS04650	ABC_transporter_permease	2.19919	10.0987	290.242	4.40482e-65	1.19077e-62
RS04655	NADH_oxidase	1.48128	10.0883	139.254	3.87565e-32	2.16769e-30
RS04660	L-lactate_dehydrogenase	-0.109357	12.7556	0.473648	0.491314	0.675157
RS04665	DNA_gyrase_subunit_A	0.543387	9.99975	27.0609	1.97142e-07	1.70997e-06
RS04670	class_A_sortase	0.606808	8.78964	32.8449	9.9811e-09	1.02464e-07
RS04675	glyoxalase	0.732353	8.23983	27.8831	1.28869e-07	1.14014e-06
RS04680	hypothetical_protein	-2.462	10.2313	359.542	3.54261e-80	1.56712e-77
RS04685	sodium_proton_antiporter	0.926532	8.34771	36.1336	1.84247e-09	2.11449e-08
RS04690	hypothetical_protein	1.75666	-0.506124	1.15805	0.28187	0.46253
RS04695	hypothetical_protein	0.805527	0.22347	0.820762	0.364957	0.559157
RS04700	hypothetical_protein	-0.081971	0.302123	0.0100195	0.920267	1
RS04705	cell_division_protein_FtsK	0.609038	0.354824	0.563768	0.452746	0.643232
RS04710	Cro/Cl_family_transcriptional_regulator	-0.784881	0.379518	0.991374	0.319407	0.506926
RS04715	hypothetical_protein	-1.57967	-0.213632	1.5912	0.207155	0.376415
RS04720	hypothetical_protein	0.513698	-0.289489	0.141026	0.707264	0.85959
RS04725	hypothetical_protein	-0.174	4.92922	1.07438	0.299957	0.484754
RS04730	antirestriction_protein_ArdA	-0.121145	0.427432	0.0254023	0.873369	0.964552
RS04735	hypothetical_protein	0.0825264	4.76584	0.183566	0.668326	0.833652
RS04740	conjugal_transfer_protein	-0.191053	0.727209	0.0894043	0.764936	0.900721
RS04745	ATP/GTP-binding_protein	1.15966	1.44583	5.53751	0.0186131	0.0555312
RS04750	hypothetical_protein	0.771047	0.428927	0.949997	0.32972	0.516639
RS04755	peptidase_P60	-1.06444	-0.304458	0.626915	0.428489	0.620899
RS04760	conjugal_transfer_protein	-0.541552	0.446509	0.511099	0.474663	0.661809
RS04765	tetracycline_resistance_ribosomal_protection_protein_Tet(M)	1.16188	7.71012	91.3582	1.19883e-21	3.99556e-20
RS04770	transcriptional_regulator	0.697686	2.90367	6.71371	0.00956746	0.0312451
RS04775	DNA-directed_RNA_polymerase_sigma-70_factor	1.75666	-0.506124	1.15805	0.28187	0.46253
RS04780	hypothetical_protein	0.573482	-0.0557825	0.281943	0.59543	0.771424
RS04785	hypothetical_protein	-0.548834	4.96846	10.599	0.00113146	0.00477509
RS04790	site-specific_integrase	-0.444762	6.26117	6.63609	0.00999329	0.0323751
RS04795	GMP_synthase_(glutamine-hydrolyzing)	0.220628	10.6144	4.04695	0.0442512	0.114902
RS04800	GntR_family_transcriptional_regulator	-0.816632	7.22428	27.4745	1.59178e-07	1.38561e-06
RS04805	FADH(2)-oxidizing_methylenetetrahydrofolate--tRNA-(uracil(54)-C(5))-methyltransferase_TrmFO	-0.299269	9.8082	7.52698	0.00607818	0.0210808
RS04810	N-acetyltransferase	-0.35442	6.83757	5.64676	0.0174876	0.0525926
RS04815	O-sialoglycoprotein_endopeptidase	-0.345883	8.09117	9.1751	0.0024533	0.00952734
RS04825	peptidase_S41	-0.796113	3.12672	8.41901	0.00371318	0.0136778
RS04830	ABC_transporter_ATP-binding_protein	-1.03883	5.32764	37.4647	9.30845e-10	1.10746e-08
RS04835	ABC_transporter_permease	-0.954999	6.93705	55.1755	1.10236e-13	1.99131e-12
RS04840	DNA-binding_response_regulator	-1.66019	6.20928	88.1213	6.15603e-21	1.98379e-19
RS04845	sensor_histidine_kinase	-1.42755	7.10446	104.838	1.32567e-24	5.33117e-23
RS04850	tyrosine_recombinase_XerS	-0.777124	6.31841	27.82	1.3314e-07	1.17154e-06
RS04855	ABC_transporter_substrate-binding_protein	-0.366336	4.465	2.96543	0.0850617	0.193506
RS04860	membrane_protein	-0.132711	6.28438	0.470086	0.492948	0.676447
RS04865	DNA-binding_protein	-0.0528574	5.37742	0.0760122	0.782776	0.91401
RS04870	signal_recognition_particle_protein	-0.179869	9.70667	2.9591	0.0853955	0.193903
RS04875	DNA-binding_protein	0.321395	7.25551	6.49198	0.0108363	0.0345992
RS04880	two-component_sensor_histidine_kinase	-1.10665	9.35805	102.108	5.25869e-24	1.99912e-22
RS04885	DNA-binding_response_regulator	-1.19638	7.91766	99.9556	1.55853e-23	5.61763e-22
RS04890	aminopeptidase	-1.00691	11.4562	87.6617	7.76656e-21	2.48632e-19
RS04895	phosphate_transport_system_regulatory_protein_PhoU	0.989917	9.63568	54.2432	1.77152e-13	3.08968e-12
RS04900	phosphate_ABC_transporter_ATP-binding_protein	0.986544	9.16309	61.1209	5.36763e-15	1.08829e-13
RS04905	phosphate_ABC_transporter_ATP-binding_protein	0.721546	8.66955	33.4366	7.3625e-09	7.72111e-08
RS04910	phosphate_ABC_transporter2C_permease_protein_PstA	0.623647	8.59693	23.1515	1.49727e-06	1.13308e-05
RS04915	phosphate_ABC_transporter_permease_subunit_PstC	0.638089	8.74079	28.8748	7.7212e-08	7.07558e-07
RS04920	phosphate_ABC_transporter_substrate-binding_protein	0.677125	8.14294	30.8851	2.73764e-08	2.68575e-07
RS04925	23S_rRNA_methyltransferase	0.381594	7.09119	8.41285	0.00372578	0.0137138
RS04930	myo-inositol-1(or_4)-monophosphatase	0.664518	9.31107	41.6747	1.07794e-10	1.44897e-09
RS04935	hypothetical_protein	0.478644	6.97322	14.0621	0.000176874	0.000904064
RS04940	regulatory_protein_Spx	0.111438	8.57912	0.635901	0.425199	0.620899
RS04945	bifunctional_riboflavin_kinase/FMN_adenylyltransferase	0.461558	8.68361	13.7605	0.000207659	0.00105147
RS04950	tRNA_pseudouridine(55)_synthase_TruB	0.409966	8.55334	10.1951	0.00140817	0.00579218
RS04955	N-acetyltransferase	0.345016	7.03063	4.04495	0.0443037	0.114977
RS04960	hypothetical_protein	0.304129	7.95537	6.45472	0.0110658	0.0352626
RS04965	type_I_restriction_endonuclease_subunit_S	0.144081	6.86229	0.866827	0.351835	0.543502
RS04970	CPBP_family_intramembrane_metalloprotease	0.784156	7.33116	24.5121	7.38452e-07	5.96895e-06
RS04975	ABC_transporter_permease	0.32785	7.50719	4.9847	0.0255725	0.0728973
RS04980	ABC_transporter_ATP-binding_protein	0.405212	6.34264	4.70732	0.0300345	0.0831785
RS04985	DNA_topoisomerase_I	0.892089	9.79504	64.2552	1.09303e-15	2.38506e-14
RS04990	DNA_processing_protein_DprA	-0.163633	1.65227	0.154759	0.694028	0.853029
RS04995	ferrichrome_ABC_transporter_substrate-binding_protein	-0.302236	7.50102	5.09451	0.0240016	0.0689445
RS05000	iron_ABC_transporter_ATP-binding_protein	-0.12497	6.29947	0.653029	0.419032	0.616946
RS05005	hypothetical_protein	-0.300901	6.74781	3.86472	0.0493115	0.125383
RS05010	iron_ABC_transporter_permease	-0.384977	6.79874	8.1653	0.00426994	0.0153287
RS05015	galactoside_O-acetyltransferase	-0.571727	8.0192	21.6011	3.35652e-06	2.39485e-05
RS05020	ribonuclease_HII	-0.579414	8.28735	24.2021	8.6737e-07	6.90385e-06
RS05025	ribosome_biogenesis_GTPase_YlqF	-0.805437	8.11447	43.6898	3.84774e-11	5.57235e-10
RS05030	cell_surface_protein	-1.90371	7.97523	244.714	3.68923e-55	7.18072e-53
RS05035	hypothetical_protein	-0.118328	7.13915	0.709297	0.399677	0.598965
RS05040	DNA-binding_response_regulator	0.0270266	6.06334	0.0207251	0.88553	0.974664
RS05045	sensor_histidine_kinase	-0.305062	7.24125	5.9399	0.0148019	0.0454709
RS05055	hypothetical_protein	-0.458857	5.65492	5.18578	0.0227724	0.0659586
RS05060	hypothetical_protein	-0.640045	6.22358	21.1697	4.20366e-06	2.93052e-05
RS05065	hypothetical_protein	-0.747057	4.84002	14.8623	0.000115651	0.000617738
RS05070	hypothetical_protein	-0.621307	5.03021	12.0974	0.000504933	0.00234001
RS05080	hypothetical_protein	-0.831579	5.32698	24.343	8.06212e-07	6.46298e-06
RS05085	hypothetical_protein	-0.0660365	6.42439	0.172434	0.677958	0.839853
RS05090	hypothetical_protein	0.0494353	7.36589	0.123846	0.7249	0.872485
RS05095	type_VII_secretion_protein_EssC	0.764769	8.81524	31.3533	2.15097e-08	2.13169e-07
RS05100	type_VII_secretion_protein_EssB	1.23154	6.77702	52.4953	4.31277e-13	7.36349e-12
RS05105	hypothetical_protein	1.37175	4.25305	33.4185	7.43121e-09	7.7764e-08
RS05110	type_VII_secretion_protein_EssA	1.28698	5.2535	42.8284	5.97571e-11	8.40398e-10
RS05115	ABC_transporter_permease	0.838106	8.60039	22.9564	1.65715e-06	1.24532e-05
RS05120	hypothetical_protein	0.670942	6.15242	12.3646	0.00043754	0.00207714
RS05125	hypothetical_protein	0.845972	5.09787	9.03537	0.00264805	0.0102103
RS05130	carbamoyl_phosphate_synthase_large_subunit	2.60906	7.62639	133.667	6.4616e-31	3.41762e-29
RS05135	carbamoyl_phosphate_synthase_small_subunit	2.95897	5.98726	141.967	9.88904e-33	5.66118e-31
RS05140	aspartate_carbamoyltransferase	2.49282	5.3992	63.0325	2.03323e-15	4.26452e-14
RS05145	dihydroorotase	3.04552	7.61918	139.657	3.16399e-32	1.79023e-30
RS05150	orotate_phosphoribosyltransferase	2.90516	6.16507	117.322	2.44094e-27	1.12053e-25
RS06330	bifunctional_metallophosphatase/5-nucleotidase	2.16094	6.77836	82.7371	9.37233e-20	2.74733e-18
RS06335	peptide_deformylase	-0.0102268	9.26504	0.00368009	0.951627	1
RS06340	glutamate_dehydrogenase	-0.143791	9.05573	0.882705	0.347462	0.537786
RS06345	membrane_protein	-0.704359	11.0295	35.818	2.16636e-09	2.45723e-08
RS06350	multidrug_ABC_transporter_ATP-binding_protein	0.126544	8.56852	1.1531	0.282902	0.463524
RS06355	multidrug_ABC_transporter_ATP-binding_protein	0.031549	8.28094	0.0732013	0.786731	0.916652
RS06365	antibiotic_ABC_transporter_ATP-binding_protein	0.272624	8.53735	6.17032	0.0129911	0.0406004
RS06370	CCA_tRNA_nucleotidyltransferase	0.332194	7.76699	7.54406	0.00602082	0.0208968
RS06375	hypothetical_protein	0.189872	9.30794	2.62291	0.105331	0.229428
RS06380	transposase	0.0835592	8.0013	0.539337	0.462708	0.652997
RS06385	hypothetical_protein	-0.780044	5.9622	23.7058	1.12241e-06	8.75266e-06
RS06390	hypothetical_protein	-1.14562	7.79486	88.9171	4.11703e-21	1.33556e-19
RS06395	PTS_fructose_transporter_subunit_IIC	-2.07416	8.59414	7.87259	0.00501898	0.0177102
RS06400	1-phosphofructokinase	-2.35209	6.77209	23.0846	1.55031e-06	1.1714e-05
RS06405	DeoR_family_transcriptional_regulator	-1.933	6.46532	15.6008	7.82229e-05	0.000430094
RS06410	peptidoglycan_branched_peptide_synthesis_protein	-2.17259	9.62268	369.755	2.11617e-82	1.14414e-79
RS06415	hypothetical_protein	-1.78996	11.3544	199.378	2.85482e-45	4.34111e-43
RS06420	2-dehydropantoate_2-reductase	0.343786	9.34052	6.64344	0.00995214	0.0322847
RS06425	membrane_protein	0.199708	9.06716	2.08751	0.148508	0.297131
RS06430	ferredoxin--NADP(+)_reductase	0.4207	7.04043	10.2016	0.0014032	0.00577661
RS06435	tRNA_(guanosine(37)-N1)-methyltransferase_TrmD	0.229205	6.49918	2.33505	0.126491	0.264734
RS06440	ribosome_maturation_factor_RimM	-0.0138584	4.93563	0.00437518	0.947262	1
RS06455	transcriptional_regulator	-0.748303	8.71368	47.4394	5.67304e-12	8.90483e-11
RS06460	RNA-binding_protein	1.20191	10.8651	72.5852	1.59978e-17	4.11879e-16
RS06465	30S_ribosomal_protein_S16	1.24466	10.7217	99.3394	2.12737e-23	7.61161e-22
RS06470	permease	0.591517	10.0497	25.1179	5.39296e-07	4.4403e-06
RS06475	macrolide_ABC_transporter_ATP-binding_protein	0.460619	8.97894	17.7341	2.54029e-05	0.000151669
RS06480	ABC_transporter_substrate-binding_protein	0.534285	10.4564	25.4015	4.65563e-07	3.86592e-06
RS06485	carbamoyl_phosphate_synthase_large_subunit	0.653302	8.45201	23.592	1.19079e-06	9.24143e-06
RS06490	carbamoyl_phosphate_synthase_small_subunit	0.45941	7.72295	14.1334	0.000170294	0.00087595
RS06495	bifunctional_pyrimidine_operon_transcriptional_regulator/uracil_phosphoribosyltransferase	0.528747	6.81243	17.5743	2.76302e-05	0.000163962
RS06500	RNA_pseudouridine_synthase	-0.0637519	8.17628	0.315063	0.57459	0.756685
RS06505	signal_peptidase_II	-0.0965409	6.78375	0.58626	0.443869	0.63395
RS06510	LysR_family_transcriptional_regulator	-0.137871	7.94386	1.25113	0.263336	0.44679
RS06515	50S_ribosomal_protein_L27	1.01644	10.9138	95.4454	1.52025e-22	5.20952e-21
RS06520	hypothetical_protein	1.07811	9.92027	97.3181	5.90378e-23	2.05199e-21
RS06525	50S_ribosomal_protein_L21	1.17092	10.4417	114.087	1.24718e-26	5.56769e-25
RS06530	metallophosphatase	-0.503042	9.00664	21.529	3.48514e-06	2.47934e-05
RS06535	tRNA_4-thiouridine(8)_synthase_ThiI	0.414678	8.96285	12.2114	0.000474972	0.00222232
RS06540	aminotransferase_V	0.131443	8.63688	1.57028	0.210167	0.380599
RS06545	hypothetical_protein	-1.66448	9.66032	147.709	5.49264e-34	3.76439e-32
RS06550	glutathione-disulfide_reductase	-0.609934	9.66098	19.8834	8.23131e-06	5.35476e-05
RS06555	glycosyl_transferase_family_8	-0.581327	7.47043	16.4888	4.89393e-05	0.000279834
RS06560	hypothetical_protein	-0.307905	6.48461	4.17441	0.0410388	0.108118
RS06565	accessory_Sec_system_glycosyltransferase_GtfB	-0.358681	7.09345	3.86824	0.0492082	0.125234
RS06570	accessory_Sec_system_glycosyltransferase_GtfA	-0.472454	6.96578	6.59997	0.0101981	0.0328852
RS06575	accessory_Sec_system_translocase_SecA2	-0.442098	8.02344	4.85302	0.0275978	0.0773118
RS06580	accessory_Sec_system_protein_Asp3	-0.644049	5.95988	17.2313	3.30936e-05	0.000193783
RS06585	accessory_Sec_system_protein_Asp2	-0.636953	7.22678	22.5185	2.08126e-06	1.53912e-05
RS06590	accessory_Sec_system_protein_Asp1	-0.992146	7.50536	64.1096	1.17688e-15	2.5452e-14
RS06595	accessory_Sec_system_protein_translocase_subunit_SecY2	-1.28793	6.64924	57.2307	3.87568e-14	7.39571e-13
RS06600	cell_wall_anchor	-1.01289	10.0833	63.2074	1.86044e-15	3.919e-14
RS06605	hypothetical_protein	-0.413775	10.3327	14.6141	0.000131927	0.000694983
RS06610	chorismate_synthase	0.183138	7.29533	2.13716	0.143768	0.289439
RS06615	3-dehydroquinate_synthase	0.0381087	7.19409	0.0971729	0.755249	0.89657
RS06620	3-dehydroquinase	0.715499	9.0897	34.2469	4.8546e-09	5.24945e-08
RS06625	SAM-dependent_methyltransferase	0.519852	9.21591	23.7141	1.11763e-06	8.72937e-06
RS06630	alkaline_phosphatase	-0.563509	11.0548	26.526	2.60018e-07	2.21197e-06
RS06635	50S_ribosomal_protein_L20	1.52143	11.8459	172.86	1.75628e-39	1.85784e-37
RS06640	50S_ribosomal_protein_L35	1.39167	9.52118	134.192	4.95913e-31	2.65177e-29
RS06645	translation_initiation_factor_IF-3	1.40208	10.2348	149.811	1.90619e-34	1.38441e-32
RS06650	cytidylate_kinase	0.646371	9.21867	27.5648	1.5192e-07	1.32719e-06
RS06655	membrane_protein	0.21887	8.54772	3.84396	0.0499253	0.126595
RS06660	ferredoxin	0.331098	5.16482	3.03829	0.0813216	0.186297
RS06665	hypothetical_protein	-0.00643226	8.15984	0.00327423	0.954369	1
RS06670	peptidase_T	0.153544	9.58672	1.86008	0.172615	0.334771
RS06675	polysaccharide_biosynthesis_protein	-0.926683	8.84604	55.3626	1.00225e-13	1.84732e-12
RS06680	UDP-N-acetylmuramoylalanyl-D-glutamate--22C_6-diaminopimelate_ligase	-0.406446	9.23623	13.5865	0.000227824	0.00114406
RS06685	iron_ABC_transporter_ATP-binding_protein	0.838976	6.35117	25.9944	3.42404e-07	2.88259e-06
RS06690	ferrichrome_ABC_transporter_substrate-binding_protein	0.897709	7.26739	26.9553	2.08216e-07	1.80281e-06
RS06695	ferrichrome_ABC_transporter_permease	0.765274	6.13923	20.4885	5.99921e-06	4.0601e-05
RS06700	ferrichrome_ABC_transporter_permease	0.71494	5.91676	22.952	1.66094e-06	1.24532e-05
RS06705	hypothetical_protein	0.28291	7.21032	5.57188	0.0182511	0.054686
RS06710	manganese-dependent_inorganic_pyrophosphatase	0.138804	10.6301	1.21815	0.269723	0.454143
RS06715	pyruvate_formate_lyase-activating_protein	0.0430016	7.87898	0.121763	0.727131	0.874066
RS06720	hypothetical_protein	0.456202	9.67876	14.2568	0.00015948	0.000826445
RS06725	transposase	-0.340732	4.16428	2.2042	0.137635	0.279172
RS06730	SAM-dependent_methyltransferase	0.150083	6.9736	1.0492	0.305692	0.491572
RS06735	TIGR01212_family_radical_SAM_protein	0.0733306	7.23468	0.289945	0.590256	0.770148
RS06740	phosphatase_PAP2_family_protein	0.441099	8.72545	9.53682	0.0020139	0.00796071
RS06745	membrane_protein	0.442798	8.35252	12.0634	0.000514203	0.00237843
RS06750	sortase	-0.612575	6.63151	5.87333	0.0153719	0.0470439
RS06755	hypothetical_protein	-0.753804	6.56422	5.42055	0.0199011	0.0588685
RS06760	class_C_sortase	-0.769427	7.10484	5.16991	0.0229815	0.0664343
RS06765	hypothetical_protein	-0.721536	8.2682	3.86449	0.0493183	0.125383
RS06770	hypothetical_protein	-0.736528	9.62904	9.50303	0.00205133	0.00808894
RS06775	signal_peptidase_I	-0.812645	6.06518	28.9106	7.57982e-08	6.95913e-07
RS06780	hypothetical_protein	-0.894893	5.4661	21.3979	3.73173e-06	2.63168e-05
RS06785	glycosyl_transferase	0.110768	9.43073	1.0957	0.295213	0.478835
RS06790	glycosyl_transferase_family_2	0.194063	8.57101	3.34963	0.06722	0.160812
RS06795	polysaccharide_biosynthesis_protein	0.0708277	9.46391	0.465819	0.494917	0.678194
RS06800	membrane_protein	-0.0635919	9.10258	0.349061	0.554645	0.7366
RS06805	glycosyl_transferase_family_2	-0.0604901	8.87415	0.327881	0.566909	0.750022
RS06810	glycosyl_transferase_family_2	-0.170885	9.29101	2.78531	0.0951323	0.210703
RS06815	nucleotide_sugar_dehydratase	-0.321228	9.35158	8.92185	0.0028178	0.0107625
RS06820	2-C-methyl-D-erythritol_4-phosphate_cytidylyltransferase	-0.386927	8.80939	11.8915	0.000563892	0.00258128
RS06825	LicD_family_protein	-0.291225	8.27174	6.64779	0.00992791	0.0322276
RS06830	hypothetical_protein	-0.00144175	9.30231	0.00018906	0.98903	1
RS06835	hypothetical_protein	-0.121992	7.25838	0.899335	0.34296	0.531987
RS06840	glycosyl_transferase_family_2	-0.0198875	7.88381	0.0324001	0.857152	0.960181
RS06845	alpha-L-Rha_alpha-12C3-L-rhamnosyltransferase	-0.00881801	8.35962	0.00633209	0.936576	1
RS06850	rhamnosyltransferase	-0.299443	8.37771	7.31841	0.00682517	0.0231438
RS06855	NAD(P)-dependent_oxidoreductase	-0.414743	9.41891	10.4752	0.00120985	0.00505451
RS06860	aromatic_ring_hydroxylase	-0.0160256	8.71921	0.0177214	0.894097	0.981872
RS06865	RNA_polymerase_sigma_factor_RpoD	0.23162	9.02927	4.99472	0.0254247	0.0725186
RS06870	DNA_primase	0.280672	9.53661	7.40435	0.00650665	0.0222341
RS06875	large-conductance_mechanosensitive_channel	-0.265809	11.2048	3.18414	0.0743561	0.174103
RS06880	IS3_family_transposase	-0.00457555	5.4537	0.000842809	0.97684	1
RS06890	30S_ribosomal_protein_S21	1.32272	11.4067	102.761	3.78209e-24	1.46061e-22
RS06895	Fe-S_oxidoreductase	0.734811	4.97161	14.0963	0.000173687	0.000890582
RS06900	amino_acid_ABC_transporter_substrate-binding_protein	0.261592	5.12604	1.7858	0.181438	0.347864
RS06905	ammonium_transporter	0.478046	4.54623	4.08114	0.0433644	0.113508
RS06910	pyridine_nucleotide-disulfide_oxidoreductase	0.31571	5.23578	3.18192	0.0744573	0.174103
RS06915	sulfurtransferase	0.504048	11.2371	4.84186	0.027777	0.0777244
RS06920	hypothetical_protein	-0.670751	9.01304	22.4395	2.16866e-06	1.59647e-05
RS06925	glycerol-3-phosphate_transporter	-1.1916	6.70141	63.8919	1.3144e-15	2.80521e-14
RS06930	maltodextrin_phosphorylase	0.373758	7.53332	3.93506	0.0472893	0.121047
RS06935	4-alpha-glucanotransferase	0.483111	6.2584	9.73116	0.0018117	0.00724383
RS06940	LacI_family_transcriptional_regulator	0.879911	8.66852	46.6704	8.39901e-12	1.28521e-10
RS06945	hypothetical_protein	1.19388	8.88581	65.3034	6.42109e-16	1.43986e-14
RS06950	maltose_ABC_transporter_permease	0.875495	6.65846	23.9031	1.01306e-06	8.00252e-06
RS06955	maltose_ABC_transporter_permease	0.784232	6.85547	15.4649	8.4052e-05	0.000460582
RS06960	MFS_transporter	0.210884	9.23378	3.27066	0.0705294	0.166681
RS06970	IS3_family_transposase	-0.101079	6.41334	0.592713	0.441372	0.631124
RS06975	72C8-dihydro-8-oxoguanine_triphosphatase	-0.587299	4.96486	13.444	0.00024579	0.00122292
RS06980	peptidase	-0.184684	3.00098	0.507935	0.476034	0.66315
RS06985	peptidase	0.38751	4.38472	2.04515	0.152692	0.303761
RS06990	excinuclease_ABC_subunit_B	-0.486614	9.64605	21.5717	3.40851e-06	2.42838e-05
RS06995	CPBP_family_intramembrane_metalloprotease_domain-containing_protein	0.757393	8.53495	28.2629	1.05904e-07	9.49044e-07
RS07000	glutamine_ABC_transporter_permease	-1.01084	12.3004	27.5719	1.51363e-07	1.3247e-06
RS07005	peptide_ABC_transporter_ATP-binding_protein	-0.997858	11.9253	14.2667	0.00015865	0.000823017
RS07010	hypothetical_protein	1.08624	6.44423	32.7379	1.0546e-08	1.07809e-07
RS07015	hypothetical_protein	0.913249	7.85964	60.8333	6.21197e-15	1.25425e-13
RS07020	GTPase_ObgE	0.920057	8.87839	56.6737	5.14479e-14	9.74106e-13
RS07025	DUF4044_domain-containing_protein	-0.283289	8.21857	6.60742	0.0101555	0.0327913
RS07030	aminopeptidase	-0.458371	7.38155	4.21239	0.0401298	0.106011
RS07035	cell_wall_surface_anchor_protein	0.368933	9.90551	7.31634	0.00683306	0.0231448
RS07040	amidase	0.488817	9.05831	9.75874	0.00178472	0.00715949
RS07045	hypothetical_protein	0.250765	3.9223	1.09403	0.29558	0.479271
RS07050	16S_rRNA_pseudouridine(516)_synthase	0.233788	5.55154	1.99869	0.157435	0.31065
RS07055	aldo/keto_reductase	-0.971518	11.0157	42.4278	7.33399e-11	1.02549e-09
RS07060	NAD(P)H-dependent_oxidoreductase	-1.5239	8.23909	146.24	1.15037e-33	7.56443e-32
RS07065	lactoylglutathione_lyase	-0.826674	10.1414	29.2358	6.40838e-08	5.93965e-07
RS07070	glycosyltransferase	-0.936215	7.49731	54.6752	1.42187e-13	2.53064e-12
RS07075	amino_acid_transporter	0.146472	10.1746	1.59513	0.206595	0.376415
RS07080	SsrA-binding_protein	0.411276	8.11696	12.3426	0.000442732	0.00209566
RS07085	ribonuclease_R	0.394133	9.20432	12.7187	0.000362009	0.00174582
RS07090	preprotein_translocase_subunit_SecG	0.818096	10.407	54.9136	1.25945e-13	2.26143e-12
RS07095	MFS_transporter	-0.314149	9.01327	6.56006	0.0104293	0.0334315
RS07100	hypothetical_protein	0.407685	6.61092	8.51168	0.00352875	0.0130776
RS07105	ABC_transporter_ATP-binding_protein	0.423629	5.11909	4.42325	0.0354525	0.0959998
RS07110	dephospho-CoA_kinase	-0.75171	6.22156	25.1712	5.24585e-07	4.3265e-06
RS07115	formamidopyrimidine-DNA_glycosylase	-0.866474	5.40891	22.6232	1.97095e-06	1.4687e-05
RS07120	transcriptional_regulator	-0.591353	5.07815	8.63677	0.00329445	0.0123888
RS07125	transglutaminase	-0.188063	5.66789	1.44049	0.230061	0.405607
RS07130	hypothetical_protein	-0.271799	3.12891	0.921893	0.336978	0.52522
RS07135	hypothetical_protein	-0.397596	3.25417	1.62212	0.202797	0.372381
RS07140	hypothetical_protein	0.154654	4.12644	0.403583	0.525244	0.707989
RS07145	hypothetical_protein	0.0707744	7.85165	0.356941	0.55021	0.73271
RS07150	GTPase_Era	0.261441	8.83543	5.66934	0.0172639	0.0519841
RS07155	UDP_kinase	0.0462263	7.17417	0.144954	0.703404	0.85959
RS07160	endoribonuclease_YbeY	0.0444526	8.3537	0.149828	0.6987	0.857688
RS07165	polyketide_synthesis_methyltransferase	-0.776857	6.15287	19.3259	1.10204e-05	7.05594e-05
RS07170	DNA_mismatch_repair_protein_MutT	-0.100849	5.09548	0.327257	0.567279	0.750103
RS07175	nucleotidyltransferase	0.0075545	6.29016	0.00137585	0.970411	1
RS07180	PhoH_family_protein	-0.764783	8.51122	38.2253	6.3029e-10	7.68669e-09
RS07185	oleate_hydratase	-2.08775	10.0057	297.058	1.44157e-66	4.12628e-64
RS07190	hypothetical_protein	-0.676701	8.16398	26.5266	2.59929e-07	2.21197e-06
RS07195	peptide-methionine_(S)-S-oxide_reductase	-0.802763	7.85627	47.22	6.34483e-12	9.92731e-11
RS07200	S1_RNA-binding_protein	0.360465	8.45532	11.8645	0.000572151	0.00261417
RS07205	ribosome-recycling_factor	0.777311	10.0278	56.9483	4.47415e-14	8.50438e-13
RS07210	UMP_kinase	0.57532	9.35828	29.1358	6.74781e-08	6.23052e-07
RS07215	ABC_transporter_ATP-binding_protein	-0.0718086	2.62178	0.0645048	0.799513	0.924547
RS07220	peptide_ABC_transporter_ATP-binding_protein	-0.0529697	3.26608	0.0412994	0.838961	0.948289
RS07225	peptide_ABC_transporter_permease	0.685832	2.55723	5.28499	0.02151	0.0627881
RS07230	peptide_ABC_transporter_permease	0.279514	3.24879	0.725366	0.394389	0.59323
RS07235	nickel_ABC_transporter2C_nickel/metallophore_periplasmic_binding_protein	0.635279	4.17311	7.33509	0.00676213	0.022962
RS07240	50S_ribosomal_protein_L1	1.25196	12.6655	100.689	1.07618e-23	3.93735e-22
RS07245	50S_ribosomal_protein_L11	1.33505	11.3816	135.996	1.99895e-31	1.09291e-29
RS07250	transposase	0.14782	3.91709	0.415866	0.519007	0.701719
RS07255	MFS_transporter	0.443046	7.57583	8.72911	0.00313169	0.0118498
RS07260	amidohydrolase	0.411287	6.847	5.73417	0.0166379	0.0502859
RS07265	LysR_family_transcriptional_regulator	0.614725	7.76874	13.8697	0.000195928	0.000998309
RS07275	IS3_family_transposase	-0.230183	6.5598	2.96047	0.0853234	0.19383
RS07280	aminodeoxychorismate_synthase2C_component_I	-0.611737	7.24255	22.3663	2.25292e-06	1.656e-05
RS07285	cell_division_protein_FtsK	0.575674	9.13831	31.0305	2.54011e-08	2.50713e-07
RS07290	peptidyl-prolyl_cis-trans_isomerase	-1.06723	8.42536	67.828	1.78398e-16	4.214e-15
RS07295	manganese_ABC_transporter_permease	0.599254	8.98555	12.3095	0.000450656	0.00212195
RS07300	manganese_ABC_transporter_ATP-binding_protein	0.618599	8.21197	19.7318	8.91077e-06	5.75064e-05
RS07305	metal_ABC_transporter_substrate-binding_protein	0.991583	9.59402	61.9203	3.57639e-15	7.31206e-14
RS07310	MarR_family_transcriptional_regulator	-0.0460897	9.20646	0.167271	0.682549	0.84468
RS07465	rRNA_(cytidine-2-O-)-methyltransferase	0.107449	8.75491	1.04977	0.30556	0.491572
RS07470	initiation-control_protein_YabA	-0.16649	6.89399	1.82583	0.17662	0.340101
RS07535	tRNA_(uridine(34)/cytosine(34)/5-carboxymethylaminomethyluridine(34)-2-O)-methyltransferase_TrmL	1.07538	7.03749	26.2687	2.97063e-07	2.50957e-06
RS07540	amino_acid_permease	0.558674	8.42838	21.0883	4.38591e-06	3.04884e-05
RS07545	Trk_system_potassium_transport_protein_TrkA	-0.811562	9.41939	54.0876	1.9175e-13	3.33235e-12
RS07550	Trk_system_potassium_transporter_TrkH	-0.369632	9.56378	10.881	0.000971549	0.0041726
RS07555	membrane_protein_insertion_efficiency_factor_YidD	1.05835	7.1637	42.3778	7.52374e-11	1.04601e-09
RS07560	ribosomal_large_subunit_pseudouridine_synthase_B	1.1527	8.22906	85.0927	2.84707e-20	8.60487e-19
RS07565	segregation/condensation_protein_B	1.11927	7.17673	62.9497	2.12051e-15	4.42851e-14
RS07570	segregation/condensation_protein_A	1.01347	7.74633	71.804	2.37665e-17	6.05485e-16
RS07575	XerD-like_tyrosine_recombinase	0.880899	7.90582	50.7649	1.04119e-12	1.71163e-11
RS07580	CBS_domain-containing_protein	0.653277	7.72943	28.384	9.94828e-08	8.96451e-07
RS07585	phosphodiesterase	0.760118	7.4055	34.5035	4.25477e-09	4.65252e-08
RS07590	non-canonical_purine_NTP_pyrophosphatase	0.566738	8.2	19.9885	7.79084e-06	5.11609e-05
RS07595	glutamate_racemase	0.56889	8.00546	21.2126	4.11044e-06	2.88205e-05
RS07600	hypothetical_protein	0.579487	8.68743	19.4732	1.02021e-05	6.55977e-05
RS07605	hypothetical_protein	-0.0438365	4.07425	0.0504503	0.822282	0.934519
RS07610	DNA-binding_protein	-0.345561	7.18952	4.51346	0.0336291	0.0915209
RS07615	membrane_protein	-0.50093	9.96095	20.4304	6.18408e-06	4.16783e-05
RS07620	hypothetical_protein	-0.289155	8.94977	6.00749	0.0142453	0.044067
RS07625	23S_rRNA_methyltransferase	0.161035	8.23734	2.23451	0.134959	0.275351
RS07630	acylphosphatase	-2.30474	5.86376	180.296	4.17648e-41	4.95677e-39
RS07635	membrane_protein_insertase_YidC	-0.734857	10.1647	36.9885	1.1883e-09	1.38664e-08
RS07640	amino_acid_ABC_transporter_permease	0.744003	9.17758	23.1959	1.46309e-06	1.11067e-05
RS07645	ABC_transporter_substrate-binding_protein	0.83684	9.43355	27.9753	1.22877e-07	1.09309e-06
RS07650	amidase	-0.624818	7.04753	17.0727	3.59759e-05	0.000209902
RS07655	transcription_elongation_factor_GreA	0.933213	9.35976	78.7873	6.91692e-19	1.90157e-17
RS07660	aminodeoxychorismate_lyase	0.88396	10.7674	76.8063	1.88579e-18	5.0419e-17
RS07665	N-acetyltransferase	1.15888	7.71644	57.7792	2.93253e-14	5.66257e-13
RS07670	UDP-N-acetylmuramate--L-alanine_ligase	0.325457	10.3057	9.02243	0.00266687	0.0102585
RS07675	hypothetical_protein	0.239506	9.66999	4.23102	0.0396916	0.105253
RS07680	RNA_helicase	-1.04676	10.1242	99.2139	2.26652e-23	8.05028e-22
RS07685	ribosome_biogenesis_GTPase_Der	0.650607	9.74606	41.4473	1.21094e-10	1.60995e-09
RS07690	primosomal_protein_DnaI	0.338899	8.47923	9.81045	0.00173523	0.00697822
RS07695	chromosome_replication_initiation_protein	0.20829	8.43224	3.38226	0.0659015	0.158124
RS07700	transcriptional_regulator_NrdR	0.173897	7.23171	1.89997	0.168082	0.328205
RS07705	two-component_sensor_histidine_kinase	0.00457301	10.6697	0.0016182	0.967912	1
RS07710	DNA-binding_response_regulator	-0.169411	11.0737	2.94769	0.0860006	0.195004
RS07715	hypothetical_protein	-1.61706	8.52915	197.485	7.39055e-45	1.05772e-42
RS07720	zinc_metalloprotease_HtpX	-0.425493	9.9823	14.3246	0.000153844	0.000799792
RS07725	membrane_protein	-0.486005	8.96063	15.3426	8.96712e-05	0.000489171
RS07730	ribosomal_RNA_small_subunit_methyltransferase_G	-0.461965	7.4997	14.331	0.000153318	0.000798762
RS07735	V-type_Na+_-ATPase_subunit_J	-0.351966	8.79794	8.74507	0.0031044	0.0117648
RS07740	potassium_transporter_Trk	-0.207347	8.71634	3.7013	0.0543701	0.135605
RS07745	cobalt_ABC_transporter_permease	0.707613	8.48808	33.7258	6.34544e-09	6.74168e-08
RS07750	heme_ABC_transporter_ATP-binding_protein	0.615787	8.83324	32.3957	1.25762e-08	1.27758e-07
RS07755	DUF3816_family_protein	0.734732	7.55252	41.5141	1.17026e-10	1.56441e-09
RS07760	serine/threonine_transporter_SstT	0.44586	9.7855	11.411	0.000730099	0.00325634
RS07765	branched-chain_amino_acid_transporter	1.43735	7.99598	27.2141	1.82125e-07	1.58254e-06
RS07770	alcohol_dehydrogenase	1.34404	7.77582	27.8768	1.29293e-07	1.14182e-06
RS07775	ABC_transporter_permease	1.09342	7.38602	63.8298	1.35646e-15	2.88232e-14
RS07780	methionine_import_ATP-binding_protein_MetN	1.20624	6.89955	82.2346	1.20854e-19	3.50044e-18
RS07785	peptidase_M20	1.15887	6.46257	68.2799	1.41859e-16	3.38689e-15
RS07790	O-sialoglycoprotein_endopeptidase	0.925195	7.30804	43.0851	5.24106e-11	7.43527e-10
RS07795	ABC_transporter_substrate-binding_protein	-0.515168	7.48543	8.56302	0.00343059	0.0128016
RS07800	glutamine_amidotransferase	-0.560466	5.86653	8.66587	0.00324225	0.0122491
RS07805	transcriptional_regulator	-0.055198	10.0315	0.18589	0.66636	0.831634
RS07810	hypothetical_protein	1.15139	5.95669	49.7429	1.75269e-12	2.84286e-11
RS07815	2-dehydropantoate_2-reductase	-0.378417	7.23769	8.39339	0.00376589	0.01383
RS07820	hypothetical_protein	-0.0274138	0.705698	0.00173951	0.966732	1
RS07825	hypothetical_protein	1.42764	0.479423	3.12156	0.0772629	0.179234
RS07830	hypothetical_protein	3.02453	-0.315528	3.474	0.0623405	0.151074
RS07835	DhaKLM_operon_coactivator_DhaQ	0.654911	5.40498	13.6457	0.000220744	0.00111194
RS07840	dihydroxyacetone_kinase_transcriptional_activator_DhaS	0.297302	3.98605	0.898228	0.343257	0.532279
RS07845	dihydroxyacetone_kinase_subunit_DhaK	0.754482	8.28742	14.3978	0.000147973	0.000773401
RS07850	dihydroxyacetone_kinase_subunit_L	1.1956	5.8399	20.668	5.46214e-06	3.72252e-05
RS07855	PTS-dependent_dihydroxyacetone_kinase_phosphotransferase_subunit_DhaM	0.493724	4.2421	3.21082	0.0731526	0.171713
RS07860	glycerol_transporter	0.177207	5.33253	0.961605	0.326783	0.514271
RS07865	cupin	-1.84038	10.6762	208.175	3.43543e-47	5.57227e-45
RS07870	MerR_family_transcriptional_regulator	0.412465	6.06881	8.33029	0.00389894	0.0142313
RS07875	hypothetical_protein	0.428469	7.61842	12.3153	0.000449249	0.00212032
RS07880	hypothetical_protein	0.425539	5.38004	6.65905	0.00986535	0.0320673
RS07885	SAM-dependent_methyltransferase	0.375264	6.73545	7.55471	0.00598536	0.0207885
RS07890	ribosome_silencing_factor_RsfS	0.108753	7.71312	0.905389	0.341341	0.529813
RS07895	cysteine_hydrolase	0.18521	8.18381	2.31856	0.127838	0.26503
RS07900	HD_domain-containing_protein	-0.0574759	8.02485	0.239668	0.624446	0.793771
RS07905	nicotinate-nicotinamide_nucleotide_adenylyltransferase	0.0909708	8.23834	0.588807	0.442881	0.63291
RS07910	RNA-binding_protein	0.115875	7.76298	0.936093	0.333285	0.520965
RS07915	ribosome_biogenesis_GTPase_YqeH	0.0554526	8.82238	0.248725	0.617974	0.788428
RS07920	HAD_family_hydrolase	0.0203559	8.26176	0.0319379	0.858164	0.960181
RS07925	EamA_family_transporter	1.43636	6.07565	92.1092	8.20239e-22	2.77172e-20
RS07930	aspartyl/glutamyl-tRNA(Asn/Gln)_amidotransferase_subunit_B	0.30601	10.3059	7.23124	0.00716456	0.0241265
RS07935	glutamyl-tRNA(Gln)_amidotransferase_subunit_A	0.175157	9.46605	2.42807	0.119179	0.252369
RS07940	aspartyl/glutamyl-tRNA(Asn/Gln)_amidotransferase_subunit_C	0.15785	7.47345	1.4417	0.229864	0.405554
RS07945	pyruvate2C_phosphate_dikinase	-0.44031	6.76658	9.14616	0.0024924	0.00967147
RS07950	phosphoenolpyruvate_synthase_regulatory_protein	-0.729534	5.90202	22.9987	1.62115e-06	1.22113e-05
RS07955	CBS_domain-containing_protein	-1.12955	5.899	54.4854	1.56611e-13	2.76482e-12
RS07960	3-hydroxybutyryl-CoA_dehydrogenase	0.370755	9.57407	7.29402	0.00691844	0.0233786
RS07965	isochorismatase	-0.154573	6.45909	0.579029	0.446693	0.637422
RS07970	GTP-sensing_pleiotropic_transcriptional_regulator_CodY	0.268785	9.78191	4.82416	0.0280636	0.0784813
RS07975	aminotransferase	-0.681599	9.22706	30.7931	2.87062e-08	2.8049e-07
RS07980	universal_stress_protein_UspA	-0.304595	9.68792	7.71874	0.00546506	0.0191454
RS07985	haloacid_dehalogenase	0.166968	7.84751	1.6528	0.198578	0.367995
RS07990	L-asparaginase	0.228227	7.50259	3.17989	0.0745497	0.174236
RS07995	shikimate_dehydrogenase	-0.76348	5.73952	24.6645	6.82278e-07	5.56108e-06
RS08000	aldo/keto_reductase	-1.50775	7.62408	103.267	2.92835e-24	1.15849e-22
RS08005	DNA_helicase_RecG	-0.583389	9.32086	32.0151	1.52979e-08	1.53168e-07
RS08010	CHAP_domain-containing_protein	-0.185854	11.5397	2.39329	0.121857	0.256691
RS08015	alanine_racemase	-0.199132	8.2254	2.96413	0.08513	0.193571
RS08020	holo-ACP_synthase	-0.116921	6.55771	0.754848	0.384946	0.581903
RS08025	phospho-2-dehydro-3-deoxyheptonate_aldolase	-0.0239777	8.38313	0.0419551	0.837705	0.94753
RS08030	preprotein_translocase_subunit_SecA	0.336329	11.613	11.0423	0.000890583	0.00386581
RS08035	mannose-6-phosphate_isomerase2C_class_I	-0.653215	8.51196	22.953	1.66012e-06	1.24532e-05
RS08040	fructokinase	-0.782662	2.5398	3.14999	0.0759276	0.176946
RS08045	PTS_beta-glucoside_transporter_subunit_EIIBCA	-0.060831	4.97756	0.108361	0.742018	0.884099
RS08050	sucrose-6-phosphate_hydrolase	0.0647299	6.57033	0.0808146	0.776196	0.90977
RS08055	LacI_family_transcriptional_regulator	0.149651	6.35382	0.665307	0.414693	0.612726
RS08060	N_utilization_substance_protein_B	0.314358	9.87849	5.09794	0.0239542	0.0688897
RS08065	Asp23/Gls24_family_envelope_stress_response_protein	0.173837	9.10418	1.27031	0.259709	0.444043
RS08070	elongation_factor_P	0.353067	9.5464	7.59637	0.00584859	0.0203698
RS08075	hypothetical_protein	-0.250224	5.56456	2.27821	0.131203	0.269496
RS08080	hypothetical_protein	-0.414631	5.46089	4.65392	0.0309827	0.0852243
RS08085	hypothetical_protein	-0.405863	5.94063	6.14258	0.0131965	0.0411924
RS08090	hypothetical_protein	-0.69818	6.3316	22.143	2.53073e-06	1.83525e-05
RS08095	peptidase_M24_family_protein	-0.807066	7.60839	48.7667	2.88291e-12	4.62978e-11
RS08100	DUF4811_domain-containing_protein	1.49108	8.00679	56.1316	6.77804e-14	1.26368e-12
RS08105	MFS_transporter	1.22318	7.92322	36.6052	1.44646e-09	1.67185e-08
RS08110	excinuclease_ABC_subunit_A	-0.751154	9.9064	44.7026	2.29358e-11	3.38198e-10
RS08115	membrane_protein	-0.238901	9.62157	4.05024	0.044165	0.114801
RS08120	magnesium_transporter	-0.256379	9.50727	5.31425	0.0211517	0.0619279
RS08125	30S_ribosomal_protein_S18	1.11008	11.6869	67.8742	1.7427e-16	4.13658e-15
RS08130	Single-stranded_DNA-binding_protein_1	1.01735	11.5815	74.6762	5.5462e-18	1.4588e-16
RS08135	30S_ribosomal_protein_S6	1.0413	10.8115	78.7033	7.21756e-19	1.97307e-17
RS08140	A/G-specific_adenine_glycosylase	0.0452828	7.66323	0.142601	0.705708	0.85959
RS08145	transcriptional_regulator	-0.338064	5.59871	3.43408	0.0638641	0.154072
RS08150	thiol_reductase_thioredoxin	-1.21457	11.4313	103.098	3.18962e-24	1.24165e-22
RS08155	acid_phosphatase	-0.0921226	7.01171	0.437724	0.508223	0.691558
RS08160	endonuclease_MutS2	-0.117296	8.71877	1.15777	0.281929	0.46253
RS08165	colicin_V_production_protein	0.650695	8.90753	33.8389	5.98707e-09	6.40288e-08
RS08170	hypothetical_protein	0.493526	7.11768	10.1645	0.00143167	0.00587395
RS08175	ribonuclease_HIII	-0.616871	8.36683	24.2705	8.37097e-07	6.69953e-06
RS08180	signal_peptidase_I	-0.217216	8.28752	3.559	0.0592236	0.145841
RS08185	helicase	-0.651733	8.39358	35.2082	2.96278e-09	3.32187e-08
RS08190	hypothetical_protein	0.233259	10.15	3.62064	0.0570669	0.141461
RS08195	DNA_polymerase_IV	-0.143245	6.98707	0.974308	0.323608	0.510682
RS08200	formate_acetyltransferase	0.536604	11.8249	3.37275	0.0662831	0.158883
RS08205	FMN-binding_protein	0.59811	7.00807	5.31262	0.0211715	0.0619486
RS08210	serine_hydrolase	-0.20236	9.0308	3.05588	0.0804452	0.184906
RS08215	peptidase	-0.407126	8.11383	12.1102	0.000501477	0.0023262
RS08220	anion_permease	0.68578	6.9815	20.9481	4.71889e-06	3.24324e-05
RS08225	aquaporin	0.721768	10.5301	45.7882	1.31758e-11	1.9973e-10
RS08230	universal_stress_protein_UspA	3.60375	9.47741	20.3318	6.5109e-06	4.36392e-05
RS08235	MFS_transporter	2.95075	9.75232	23.4244	1.29921e-06	1.00031e-05
RS08240	Crp/Fnr_family_transcriptional_regulator	-1.05053	7.3327	31.0012	2.57867e-08	2.53491e-07
RS08245	Xaa-Pro_dipeptidyl-peptidase	-0.664045	8.98135	22.4545	2.15185e-06	1.58891e-05
RS08250	hypothetical_protein	-0.263541	6.54327	2.94985	0.0858854	0.194834
RS08255	geranylgeranyl_pyrophosphate_synthase	0.218702	9.66371	3.35506	0.0669987	0.160441
RS08260	amino_acid_ABC_transporter_ATP-binding_protein	-0.213335	9.10799	0.701261	0.40236	0.599108
RS08265	thiol_reductant_ABC_exporter_subunit_CydD	-0.301934	9.42045	2.03655	0.153557	0.305232
RS08270	cytochrome_c_oxidase_assembly_protein	-0.169501	10.4129	1.1312	0.28752	0.469172
RS08275	cytochrome_ubiquinol_oxidase_subunit_I	0.111194	10.7795	0.551449	0.457726	0.647658
RS08280	NADH_dehydrogenase	0.430096	10.5073	8.83708	0.0029517	0.0112211
RS08285	12C4-dihydroxy-2-naphthoate_octaprenyltransferase	0.555957	10.6093	18.9993	1.30765e-05	8.25298e-05
RS08290	hypothetical_protein	-1.06013	5.18406	32.9848	9.28823e-09	9.57554e-08
RS08295	nucleoid-associated_protein2C_YbaB/EbfC_family	-0.347622	9.54791	5.71526	0.0168181	0.0507672
RS08300	cyclopropane-fatty-acyl-phospholipid_synthase	-1.15089	9.4598	107.919	2.80032e-25	1.15478e-23
RS08305	MerR_family_transcriptional_regulator	1.01314	6.90806	37.1685	1.08348e-09	1.27657e-08
RS08310	3-5_exonuclease	0.939524	5.1345	12.2925	0.000454789	0.00213199
RS08315	hypothetical_protein	1.26079	7.66173	90.5235	1.8279e-21	6.05074e-20
RS08320	aminoacetone_oxidase_family_FAD-binding_enzyme	0.841758	9.05578	41.8123	1.00472e-10	1.35804e-09
RS08325	DUF4931_domain-containing_protein	0.456728	5.56597	8.07379	0.004491	0.0160685
RS08330	30S_ribosomal_protein_S14	0.6361	7.57541	24.411	7.78241e-07	6.25937e-06
RS08335	amino_acid_lyase	-0.787353	7.03229	32.2229	1.3746e-08	1.38485e-07
RS08340	tRNA_(adenosine(37)-N6)-threonylcarbamoyltransferase_complex_transferase_subunit_TsaD	0.38433	8.72029	11.3564	0.0007519	0.00334743
RS08345	ribosomal-protein-alanine_N-acetyltransferase_RimI	0.299839	7.1212	6.27586	0.0122394	0.0384486
RS08350	tRNA_(adenosine(37)-N6)-threonylcarbamoyltransferase_complex_dimerization_subunit_type_1_TsaB	0.147325	7.66553	1.61339	0.204016	0.373773
RS08355	hypothetical_protein	0.21563	7.88853	3.11068	0.0777804	0.179971
RS08360	ribonuclease_J	0.363454	11.1328	13.1701	0.000284457	0.00140382
RS08365	CHAP_domain-containing_protein	0.0641775	6.72767	0.1135	0.736194	0.878881
RS08370	type_I_glutamate--ammonia_ligase	-1.06331	11.3494	50.5716	1.14895e-12	1.88243e-11
RS08375	MerR_family_transcriptional_regulator	-1.13832	9.90531	42.1958	8.25751e-11	1.13827e-09
RS08380	FUSC_family_protein	-0.842984	7.13504	37.2557	1.03612e-09	1.2297e-08
RS08385	phosphoglycerate_kinase	-0.534503	13.3069	11.7388	0.00061209	0.00278358
RS09005	22C3-cyclic-nucleotide_2-phosphodiesterase	2.29874	6.68185	83.7236	5.69006e-20	1.68828e-18
RS09010	class_Ib_ribonucleoside-diphosphate_reductase_assembly_flavoprotein_NrdI	-0.894747	6.75933	29.6842	5.08479e-08	4.74905e-07
RS09015	peptidase_M42	-0.944521	8.40328	40.8875	1.61253e-10	2.10929e-09
RS09020	zeta_toxin	-0.751875	7.89811	27.9285	1.25883e-07	1.11778e-06
RS09030	iron_ABC_transporter_substrate-binding_protein	0.00380509	5.81632	0.000692036	0.979013	1
RS09035	DNA-binding_response_regulator	0.0522421	4.91844	0.0867749	0.768318	0.902824
RS09040	sensor_histidine_kinase	-0.0605266	5.92125	0.130264	0.718158	0.867782
RS09045	PTS_mannose_transporter_subunit_IID	1.27303	2.8894	8.24619	0.00408376	0.0147525
RS09050	PTS_mannose_transporter_subunit_IIC	0.642186	2.32756	3.7932	0.0514613	0.129862
RS09055	PTS_sorbose_transporter_subunit_IIB	0.602054	2.65127	4.05192	0.044121	0.114801
RS09060	PTS_mannose_transporter_subunit_IIA	-0.182356	3.23279	0.312189	0.57634	0.758375
RS09065	alanine_racemase	0.0500936	4.80057	0.0448882	0.83221	0.943507
RS09070	membrane_protein	0.455266	6.06752	10.0861	0.00149394	0.00608835
RS09075	ABC_transporter_ATP-binding_protein	0.555434	5.06877	5.85666	0.0155182	0.0474021
RS09080	hypothetical_protein	0.334817	3.54658	2.19444	0.13851	0.280595
RS09085	ABC_transporter_ATP-binding_protein	0.512014	1.26783	1.05482	0.3044	0.490468
RS09090	TCS_sensor_kinase	0.586512	5.65196	7.74923	0.00537354	0.0188519
RS09095	DNA-binding_response_regulator	0.830702	3.93293	17.6232	2.69284e-05	0.000159992
RS09100	RgfB_protein	0.303516	4.40645	2.48332	0.115059	0.245903
RS09105	PTS_glucose_transporter_subunit_IIABC	0.867135	6.03195	18.8053	1.44765e-05	9.04272e-05
RS09110	histidine_kinase	-0.844803	7.47485	41.802	1.01e-10	1.3614e-09
RS09115	DNA-binding_response_regulator	-0.991825	5.45949	33.7679	6.20963e-09	6.61183e-08
RS09120	phosphate_transport_system_regulatory_protein_PhoU	-0.618897	3.29275	4.93953	0.0262492	0.0744676
RS09125	phosphate_ABC_transporter_ATP-binding_protein	-0.823076	2.32071	5.7455	0.0165309	0.0500481
RS09130	phosphate_ABC_transporter2C_permease_protein_PstA	-1.24946	3.41639	21.4282	3.67333e-06	2.60181e-05
RS09135	phosphate_ABC_transporter_permease_subunit_PstC	-0.637525	2.7165	3.81301	0.0508559	0.12862
RS09140	phosphate-binding_protein	-1.55743	2.90471	29.2004	6.52665e-08	6.03778e-07
RS09145	thymidylate_kinase	-0.354212	7.91757	8.60902	0.00334502	0.0125496
RS09150	16S_rRNA_(uracil(1498)-N(3))-methyltransferase	-0.338194	6.78923	5.91859	0.0149819	0.045966
RS09155	50S_ribosomal_protein_L11_methyltransferase	-0.560241	6.8011	17.1745	3.4098e-05	0.000199424
RS09160	hypothetical_protein	-0.634445	6.52454	19.8644	8.31344e-06	5.40096e-05
RS09165	MerR_family_transcriptional_regulator	-0.984035	6.45285	42.9427	5.63678e-11	7.95031e-10
RS09170	N-acetyltransferase	-0.513329	7.3929	18.9638	1.33224e-05	8.38641e-05
RS09175	DNA_mismatch_repair_protein_MutT	-0.569957	6.16174	12.8438	0.000338598	0.00164597
RS09180	hypothetical_protein	-0.484994	6.57278	10.12	0.00146667	0.00600741
RS09185	N-acetyltransferase	-0.202613	5.86667	1.37443	0.241051	0.419963
RS09190	recombinase_RarA	-0.000227109	7.62715	3.95091e-06	0.998414	1
RS09200	site-specific_integrase	0.112913	6.05803	0.56841	0.450892	0.642095
RS09205	hypothetical_protein	-0.262483	1.34433	0.300712	0.583436	0.763583
RS09210	hypothetical_protein	0.0774276	5.02033	0.0893364	0.765022	0.900721
RS09215	cell_wall_anchor	-0.556419	2.12723	1.80627	0.178956	0.343647
RS09220	hypothetical_protein	-0.150396	0.548532	0.0445678	0.832801	0.943957
RS09225	amidase	-0.343581	1.26793	0.463855	0.495828	0.678868
RS09235	hypothetical_protein	-0.751981	3.92349	4.88824	0.0270403	0.0760787
RS09240	conjugal_transfer_protein	-0.00371068	3.75591	0.000220246	0.988159	1
RS09245	conjugal_transfer_protein	-0.561876	1.01726	0.980107	0.322172	0.509678
RS09250	hypothetical_protein	0.21786	0.231403	0.0639824	0.800309	0.924547
RS09255	conjugal_transfer_protein	-0.266092	1.26661	0.264939	0.606747	0.780158
RS09260	Txe/YoeB_family_addiction_module_toxin	-0.273327	5.86497	2.1291	0.144526	0.290545
RS09265	prevent-host-death_protein	-0.428616	6.00285	7.37024	0.0066312	0.0225804
RS09270	hypothetical_protein	-0.295468	-0.221522	0.0588923	0.808255	0.925205
RS09275	hypothetical_protein	0.432397	0.316151	0.246297	0.619695	0.789607
RS09280	hypothetical_protein	-1.29867	2.03158	12.0348	0.00052216	0.00240837
RS09285	hypothetical_protein	-0.0586525	8.83836	0.250613	0.616644	0.788092
RS09290	transporter	-0.227555	9.19283	4.70838	0.0300158	0.083176
RS09295	transcriptional_regulator	0.981746	0.675937	2.00349	0.156938	0.309834
RS09300	hypothetical_protein	0.934015	0.80111	2.10614	0.146709	0.294144
RS09305	Cro/Cl_family_transcriptional_regulator	0.675067	1.26645	1.50884	0.219316	0.392351
RS09310	cell_division_protein_FtsK	0.788348	1.42404	2.08068	0.149173	0.297857
RS09315	hypothetical_protein	-0.0260304	0.67669	0.00125211	0.971773	1
RS09320	hypothetical_protein	1.38254	-0.140887	1.27201	0.25939	0.443826
RS09325	cell_wall_surface_anchor_protein	0.897537	1.72034	4.52878	0.0333293	0.0908065
RS09330	hypothetical_protein	-0.534418	2.64306	2.58265	0.108041	0.234489
RS09335	hypothetical_protein	-0.802885	0.27629	0.719025	0.396464	0.595798
RS09340	hypothetical_protein	0.0582469	0.0254515	0.0034337	0.953272	1
RS09345	hypothetical_protein	-1.01691	0.119916	1.03598	0.308758	0.494387
RS09350	transcriptional_regulator	-1.13394	0.502597	2.33618	0.126399	0.264654
RS09355	transcriptional_regulator	-0.117955	6.85522	0.747753	0.387189	0.583843
RS09360	transcriptional_regulator	0.0799732	6.81246	0.32989	0.565724	0.748861
RS09365	hypothetical_protein	0.23751	8.20764	3.34508	0.067406	0.161099
RS09370	hypothetical_protein	-0.706807	6.47799	20.1867	7.0238e-06	4.67548e-05
RS09375	hypothetical_protein	-0.466076	5.49684	7.03672	0.00798551	0.026633
RS09380	XRE_family_transcriptional_regulator	-0.718705	4.58893	16.4593	4.9706e-05	0.000283552
RS09385	hypothetical_protein	0.176566	8.99633	1.39863	0.236953	0.414454
RS09390	ISL3_family_transposase	-0.402019	4.64319	4.75411	0.0292284	0.0814111
RS09395	mercury(II)_reductase	-0.783191	5.04992	17.5043	2.86655e-05	0.000169485
RS09400	Hg(II)-responsive_transcriptional_regulator	-0.475086	3.77251	3.2409	0.0718213	0.169241
RS09405	manganese_transporter	-0.0711935	8.52302	0.381672	0.53671	0.718863
RS09410	ABC_transporter_permease	0.240144	6.90822	1.42357	0.232817	0.409724
RS09415	ABC_transporter_ATP-binding_protein	0.545462	6.08544	13.582	0.000228368	0.0011456
RS09420	YydF_family_exported_signaling_peptide	0.357229	6.40882	3.97936	0.0460611	0.118588
RS09425	hypothetical_protein	1.15634	4.48314	24.0365	9.45285e-07	7.49146e-06
RS09430	YydG_family_peptide_radical_SAM_peptide_maturase	1.45653	4.51709	23.1991	1.46064e-06	1.11055e-05
RS09435	hypothetical_protein	-0.207391	6.65509	2.54293	0.110789	0.239029
RS09440	hypothetical_protein	-0.256756	6.54743	3.63911	0.0564373	0.140079
RS09445	hypothetical_protein	-0.543625	7.9529	19.0122	1.29882e-05	8.20787e-05
RS09450	hypothetical_protein	-0.333074	6.47767	5.16917	0.0229913	0.0664343
RS09455	hypothetical_protein	-0.398356	6.74262	8.54051	0.00347328	0.012923
RS09460	hypothetical_protein	-0.389023	6.49162	8.41959	0.00371199	0.0136778
RS09465	hypothetical_protein	-0.395763	5.88459	6.20289	0.0127542	0.0399112
RS09470	streptomycin_resistance_protein	-0.318288	6.96618	4.39029	0.0361441	0.0976392
RS09475	hypothetical_protein	0.149681	4.84723	0.565767	0.451946	0.643032
RS09480	hypothetical_protein	0.218945	5.24116	1.89149	0.169033	0.329133
RS09485	PadR_family_transcriptional_regulator	-0.103001	4.23995	0.197	0.657153	0.823515
RS09490	N-acetyltransferase	-0.456234	5.40616	5.41883	0.0199207	0.0588908
RS09495	ABC_transporter_permease	0.0716255	5.28951	0.180532	0.670917	0.835289
RS09500	ABC_transporter_ATP-binding_protein	0.171285	5.45244	0.659916	0.41659	0.61428
RS09505	hypothetical_protein	0.114701	3.47424	0.271896	0.602063	0.775858
RS09510	transcriptional_regulator	-0.178309	6.03729	1.2067	0.271987	0.457163
RS09525	PAP2_family_phosphoesterase	-1.23328	5.51725	50.9292	9.57596e-13	1.57955e-11
RS09530	hypothetical_protein	0.617314	4.89188	12.3121	0.000450037	0.00212195
RS09535	Rossman_fold_protein2C_TIGR00730_family	0.655932	6.55502	13.3592	0.000257162	0.00127689
RS09540	CPBP_family_intramembrane_metalloprotease	-0.607028	7.25848	10.3586	0.00128872	0.0053343
RS09545	rhodanese	1.28741	8.96093	33.3123	7.84847e-09	8.1604e-08
RS09550	hypothetical_protein	1.2472	10.0084	42.388	7.48463e-11	1.04356e-09
RS09555	topology_modulation_protein	-0.69152	5.89144	20.2633	6.74825e-06	4.51058e-05
RS09560	glycerol_dehydrogenase	0.520499	6.53094	7.995	0.00469068	0.016697
RS09565	cyclic_nucleotide-binding_protein	-2.65426	7.94029	181.302	2.51862e-41	3.14246e-39
RS09570	bifunctional_homocysteine_S-methyltransferase/methylenetetrahydrofolate_reductase	1.08933	4.64397	36.7772	1.32433e-09	1.54167e-08
RS09575	5-methyltetrahydropteroyltriglutamate--homocysteine_S-methyltransferase	0.832021	4.25698	18.4756	1.7209e-05	0.000105332
RS09580	branched-chain_amino_acid_transporter	0.963883	5.04618	25.3913	4.68026e-07	3.87975e-06
RS09585	branched-chain_amino_acid_transporter_AzlC	0.814138	5.10934	18.2302	1.95749e-05	0.000118768
RS09590	hypothetical_protein	0.62685	5.36168	12.4	0.000429324	0.00204212
RS09595	DNA-binding_response_regulator	-1.32169	6.22268	87.1816	9.9002e-21	3.12821e-19
RS09600	two-component_sensor_histidine_kinase	-1.20421	7.42423	52.8176	3.66006e-13	6.27108e-12
RS09605	hypothetical_protein	-1.33325	7.08257	109.239	1.43878e-25	6.25098e-24
RS09610	leucine--tRNA_ligase	0.382035	10.4482	8.87808	0.00288615	0.0109805
RS09615	transposase	-0.235404	4.04357	1.17413	0.278555	0.46253
RS09620	MFS_transporter	1.05277	7.0228	22.5543	2.04286e-06	1.51533e-05
RS09625	patatin_family_protein	-0.512117	7.43858	19.9163	8.0907e-06	5.28222e-05
RS09630	hypothetical_protein	0.118756	7.90539	0.933969	0.333834	0.521655
RS09635	hypothetical_protein	0.198999	8.53533	2.48725	0.114772	0.245595
RS09640	transcription_termination/antitermination_protein_NusG	-0.0932478	9.77003	0.343735	0.557681	0.739825
RS09645	pathogenicity_protein	0.306959	4.21233	2.6281	0.104987	0.228884
RS09650	preprotein_translocase_subunit_SecE	-0.410249	8.50931	11.5505	0.000677316	0.00304173
RS09655	50S_ribosomal_protein_L33	-0.40908	7.70512	12.052	0.000517368	0.00238853
RS09660	penicillin-binding_protein_2A	-1.07737	8.91609	80.0105	3.72428e-19	1.04151e-17
RS09665	RNA_pseudouridine_synthase	0.202164	7.0074	2.52534	0.112031	0.240893
RS09670	hypothetical_protein	-0.746338	8.23482	32.7728	1.03582e-08	1.06112e-07
RS09675	phosphopentomutase	-0.941937	8.90925	49.453	2.03177e-12	3.27371e-11
RS09680	2-deoxyribose-5-phosphate_aldolase	-0.433275	8.59732	12.2882	0.000455826	0.00213479
RS09685	hypothetical_protein	-0.810891	9.55787	30.2303	3.83672e-08	3.66068e-07
RS09690	uridine_phosphorylase	-0.880813	8.22189	20.1298	7.2361e-06	4.79712e-05
RS09695	GntR_family_transcriptional_regulator	-1.31542	6.8624	86.464	1.42303e-20	4.43052e-19
RS09700	hypothetical_protein	-1.22222	5.44388	43.1303	5.12121e-11	7.29272e-10
RS09705	molecular_chaperone_GroEL	-0.870205	10.8841	55.3162	1.0262e-13	1.88434e-12
RS09710	co-chaperone_GroES	-0.71286	8.32649	22.9216	1.68745e-06	1.26325e-05
RS09715	ABC_transporter_ATP-binding_protein	0.141949	5.57717	0.665782	0.414526	0.612726
RS09730	haloacid_dehalogenase	-0.035499	5.65278	0.0424071	0.836846	0.946998
RS09735	glyoxalase	-0.462089	3.37249	3.0168	0.0824057	0.188345
RS09740	peroxide_stress_protein_YaaA	-0.302163	6.45168	4.09116	0.0431081	0.113019
RS09745	anaerobic_ribonucleoside-triphosphate_reductase_activating_protein	0.505458	6.8349	6.88889	0.00867329	0.0286131
RS09750	GNAT_family_acetyltransferase	0.43626	9.22704	5.23934	0.0220817	0.0641873
RS09755	hypothetical_protein	0.31419	9.36281	2.30008	0.129368	0.266965
RS09760	hypothetical_protein	0.542324	8.17043	7.21843	0.00721587	0.0242322
RS09765	anaerobic_ribonucleoside-triphosphate_reductase	2.22092	9.78278	113.042	2.11252e-26	9.345e-25
RS09770	hypothetical_protein	0.566707	9.68751	23.2277	1.43912e-06	1.09933e-05
RS09775	hypothetical_protein	0.245843	2.39922	0.628358	0.427958	0.620899
RS09780	hypothetical_protein	-1.41207	11.1953	157.436	4.11059e-36	3.50915e-34
RS09785	Holliday_junction_resolvase_RuvX	-1.487	10.4304	189.407	4.28355e-43	5.95536e-41
RS09790	hypothetical_protein	-1.67498	9.65293	229.957	6.09173e-52	1.09787e-49
RS09795	arsenate_reductase	-2.97153	11.7013	317.492	5.09593e-71	1.65312e-68
RS09800	DNA_recombination/repair_protein_RecA	-0.0250772	10.3649	0.0549938	0.814591	0.93078
RS09805	damage-inducible_protein_A	-0.917959	7.54731	54.6709	1.42498e-13	2.53064e-12
RS09810	DNA-3-methyladenine_glycosylase_I	0.000518021	7.27613	1.69108e-05	0.996719	1
RS09815	Holliday_junction_branch_migration_protein_RuvA	-0.154312	7.23498	1.68969	0.193642	0.365118
RS09820	MFS_transporter	-0.29545	8.27139	7.48215	0.00623135	0.0214743
RS09825	DNA_mismatch_repair_protein_MutL	-0.362327	8.92252	10.8077	0.00101081	0.00431455
RS09830	cold-shock_protein	-0.107269	12.5602	0.480473	0.488208	0.671459
RS09835	DNA_mismatch_repair_protein_MutS	-0.244108	8.83333	5.53847	0.0186029	0.0555312
RS09840	arginine_repressor	-0.671616	7.27945	30.7613	2.91807e-08	2.83986e-07
RS09845	arginine--tRNA_ligase	-0.133082	10.0447	0.950181	0.329673	0.516639
RS09850	bacteriocin_immunity_protein	-1.14696	7.43974	67.2054	2.4464e-16	5.75082e-15
RS09855	membrane_protein	0.123831	7.98575	0.699946	0.402802	0.599582
RS09860	membrane_protein	0.206991	9.04287	2.2782	0.131204	0.269496
RS09865	aspartate--tRNA_ligase	-0.114201	10.2426	1.08092	0.298492	0.483509
RS09870	histidine--tRNA_ligase	-0.234084	9.45122	3.34757	0.0673042	0.160935
RS09875	50S_ribosomal_protein_L32	1.15032	11.5284	80.1656	3.4431e-19	9.68447e-18
RS09880	50S_ribosomal_protein_L33	1.01822	10.6033	64.9776	7.57528e-16	1.68317e-14
RS09885	cadmium_transporter	-0.545967	6.31871	11.7413	0.000611289	0.00278254
RS09890	transcriptional_regulator	-0.581554	6.22699	11.9056	0.000559644	0.00256666
RS09895	transcriptional_regulator	-0.451111	7.75565	14.7133	0.000125163	0.000664172
RS09900	DNA-directed_RNA_polymerase_sigma-70_factor	0.223136	0.53738	0.0959807	0.756707	0.896874
RS09905	hypothetical_protein	-0.257206	2.04458	0.517685	0.471831	0.65926
RS09910	cell_division_protein_FtsK	-0.322112	2.82543	0.752407	0.385715	0.582523
RS09915	hypothetical_protein	-1.60663	2.94987	35.7107	2.289e-09	2.59029e-08
RS09920	hypothetical_protein	-1.07743	1.11448	3.32446	0.0682565	0.162892
RS09925	hypothetical_protein	-1.83421	1.87674	20.1449	7.17916e-06	4.77237e-05
RS09930	site-specific_integrase	-1.96053	10.5823	300.994	2.00036e-67	6.08361e-65
RS09935	peptidase	-1.10002	2.87251	11.3355	0.000760402	0.00337602
RS09940	DNA-binding_response_regulator	-0.495113	6.63809	15.088	0.000102614	0.000552958
RS09945	two-component_sensor_histidine_kinase	-0.343774	8.137	9.50506	0.00204906	0.00808654
RS09950	hypothetical_protein	0.334464	2.45715	0.681606	0.409034	0.606903
RS09955	carbamate_kinase	0.83987	1.53381	3.40802	0.0648804	0.156059
RS09960	ornithine_carbamoyltransferase_12C_catabolic	0.297158	1.80282	0.567213	0.451369	0.642586
RS09965	sensor_histidine_kinase	-1.12614	6.39223	37.1692	1.08311e-09	1.27657e-08
RS09970	hypothetical_protein	-0.465134	2.68097	1.38941	0.238505	0.416421
RS09975	glycine/betaine_ABC_transporter_ATP-binding_protein	-0.522809	8.36048	11.6468	0.000643124	0.00290032
RS09980	glycine/betaine_ABC_transporter_permease	-0.276401	10.1321	6.30711	0.0120254	0.0378743
RS09985	hypothetical_protein	-1.03623	9.59882	70.9427	3.67747e-17	9.1767e-16
RS09990	hypothetical_protein	-1.14702	7.99305	66.9135	2.8369e-16	6.6367e-15
RS09995	membrane_protein	-0.0157521	4.10406	0.00622537	0.937111	1
RS10000	membrane_protein	0.520803	5.84879	8.43401	0.00368267	0.013586
RS10005	TetR_family_transcriptional_regulator	0.0937097	5.00834	0.22508	0.635196	0.802405
RS10010	hypothetical_protein	0.452385	2.27572	1.83021	0.176102	0.339238
RS10015	hypothetical_protein	-0.382823	9.29866	9.40327	0.00216598	0.00849974
RS10020	hypothetical_protein	-0.45731	7.96118	14.1388	0.000169809	0.000874381
RS10025	ArpU_family_transcriptional_regulator	-0.0938715	2.085	0.0638179	0.80056	0.924547
RS10030	hypothetical_protein	0.449517	1.26689	0.753959	0.385226	0.581965
RS10035	hypothetical_protein	-0.606678	1.85811	1.92357	0.165464	0.323873
RS10040	hypothetical_protein	-0.126999	2.84701	0.147682	0.70076	0.859086
RS10045	DNA_damage-inducible_protein_DnaD	0.577132	2.2584	2.69486	0.100672	0.22116
RS10050	hypothetical_protein	0.309312	0.418657	0.161042	0.688199	0.84829
RS10055	hypothetical_protein	-0.0496928	1.14976	0.00893839	0.924678	1
RS10060	hypothetical_protein	0.297695	1.38272	0.375078	0.540249	0.722411
RS10065	hypothetical_protein	0.368925	0.576463	0.261673	0.608973	0.780736
RS10070	hypothetical_protein	-0.498556	0.636826	0.552099	0.457461	0.647658
RS10075	hypothetical_protein	1.42187	5.13467	43.1832	4.98458e-11	7.13382e-10
RS10080	hypothetical_protein	0.873765	8.10485	29.5288	5.50931e-08	5.13569e-07
RS10085	hypothetical_protein	-1.79614	1.33155	7.96641	0.00476533	0.0169009
RS10090	hypothetical_protein	0.962819	1.60201	3.77185	0.0521218	0.131208
RS10095	phage_repressor_protein	1.32107	1.27676	4.25976	0.0390253	0.103883
RS10100	transcriptional_regulator	0.550263	1.01396	0.940245	0.332215	0.519793
RS10105	transcriptional_regulator	-0.774773	7.34207	22.199	2.45802e-06	1.79321e-05
RS10110	hypothetical_protein	-0.754799	5.40796	15.8615	6.81504e-05	0.000379862
RS10115	hypothetical_protein	-0.47054	4.95596	5.37625	0.0204127	0.0600895
RS10120	hypothetical_protein	-0.306303	5.25924	2.80832	0.0937764	0.208268
RS10125	hypothetical_protein	-0.268779	7.52168	3.48535	0.0619144	0.151074
RS10130	site-specific_integrase	0.353814	6.85763	4.78036	0.0287861	0.0803356
RS10135	30S_ribosomal_protein_S4	1.23365	12.3117	120.663	4.52982e-28	2.18239e-26
RS10140	hypothetical_protein	0.059063	9.02354	0.303921	0.581435	0.762194
RS10145	replicative_DNA_helicase	0.0537602	10.0107	0.264484	0.607056	0.780158
RS10150	50S_ribosomal_protein_L9	0.0568288	8.59762	0.268582	0.604284	0.778102
RS10155	DHH_family_phosphoesterase	0.0825298	10.0464	0.636479	0.424989	0.620899
RS10160	tRNA_uridine-5-carboxymethylaminomethyl(34)_synthesis_enzyme_MnmG	0.0103421	9.30386	0.00775193	0.929841	1
RS10165	membrane_protein	0.81851	8.05001	41.8366	9.92284e-11	1.34497e-09
RS10170	tRNA_2-thiouridine(34)_synthase_MnmA	0.739975	8.32509	41.9486	9.37053e-11	1.27366e-09
RS10175	L-serine_dehydratase2C_iron-sulfur-dependent_subunit_beta	-1.07011	8.4877	68.5672	1.22625e-16	2.95393e-15
RS10180	L-serine_dehydratase2C_iron-sulfur-dependent_subunit_alpha	-1.02002	9.23967	65.2538	6.58478e-16	1.4698e-14
RS10185	transglycosylase	2.31554	8.68789	86.3475	1.50942e-20	4.64864e-19
RS10190	peptidoglycan-binding_protein_LysM	0.850054	6.72478	18.9706	1.32749e-05	8.36733e-05
RS10195	transporter	0.741362	7.73095	34.9736	3.3421e-09	3.69606e-08
RS10200	energy-coupling_factor_transporter_ATPase	0.43477	7.69856	15.286	9.23987e-05	0.000502922
RS10205	energy-coupling_factor_transporter_ATPase	-0.133087	9.29455	1.41667	0.233952	0.411424
RS10210	CDP-diacylglycerol--glycerol-3-phosphate_3-phosphatidyltransferase	-0.153492	8.29919	1.64678	0.199398	0.367995
RS10215	peptidase_M16	-0.0968571	8.68846	0.76459	0.381896	0.578371
RS10220	peptidase_M16	-0.38147	8.07698	11.5321	0.000684049	0.00306782
RS10225	hypothetical_protein	-0.795265	7.2667	36.6795	1.39235e-09	1.61698e-08
RS10230	DNA_replication_and_repair_protein_RecF	-0.592453	9.11679	33.8136	6.06538e-09	6.4724e-08
RS10235	sugar_transporter	0.531103	8.80101	11.8937	0.000563255	0.00258079
RS10240	transcriptional_regulator	0.454902	7.64007	9.22985	0.00238101	0.00928366
RS10245	IMP_dehydrogenase	-0.0662011	10.9743	0.333139	0.563817	0.746946
RS10250	arginine_repressor	-0.435145	8.00648	12.6329	0.000379011	0.00181701
RS10255	ArcR_family_transcriptional_regulator	-0.426447	7.97765	9.73715	0.0018058	0.00723213
RS10260	hypothetical_protein	-0.937806	5.41062	35.0728	3.17607e-09	3.54383e-08
RS10265	arginine_deiminase	0.910166	10.4441	65.6632	5.34966e-16	1.21076e-14
RS10270	GNAT_family_N-acetyltransferase	-0.471826	5.29943	5.25648	0.0218652	0.0636721
RS10275	ornithine_carbamoyltransferase	-0.262649	7.10208	1.61446	0.203866	0.37364
RS10280	arginine-ornithine_antiporter	-0.377453	6.6532	7.38344	0.00658272	0.022431
RS10285	carbamate_kinase	-0.23469	6.09914	1.78439	0.181611	0.34795
RS10290	tryptophan--tRNA_ligase	0.0610216	9.6069	0.278423	0.597737	0.773972
RS10295	DUF1275_family_protein	-0.556193	7.34808	21.0669	4.43513e-06	3.06989e-05
RS10300	membrane_protein	-0.688275	7.86372	35.8948	2.08264e-09	2.36778e-08
RS10305	ABC-F_family_ATPase	-0.277251	10.9833	7.69418	0.00553992	0.0193798
RS10310	copper_ABC_transporter_permease	-0.290937	9.09707	7.98708	0.00471124	0.0167457
RS10330	23S_rRNA_(pseudouridine(1915)-N(3))-methyltransferase_RlmH	-0.0362799	6.78171	0.0595986	0.807131	0.925205
RS10335	serine_protease	-0.902243	9.40823	41.3293	1.28629e-10	1.70548e-09
RS10340	chromosome_partitioning_protein_ParB	-0.370741	7.98289	8.80229	0.00300853	0.0114193
RS10355	transcriptional_regulator	-0.503231	2.95153	3.96225	0.0465315	0.119484
RS10360	hypothetical_protein	-3.97032	11.3058	725.309	9.38115e-160	4.56487e-156
RS10365	hypothetical_protein	0.0445767	4.7153	0.0604191	0.805835	0.925205
RS10370	hypothetical_protein	-0.635186	4.67593	14.0798	0.000175211	0.000896791
RS10375	hypothetical_protein	-0.720478	3.67444	8.00306	0.00466984	0.0166586
RS10380	hypothetical_protein	-0.537924	2.52399	3.03683	0.0813949	0.186297
RS10385	hypothetical_protein	-0.08192	0.311517	0.0100078	0.920313	1
RS10390	endonuclease	-0.423069	5.64829	6.62551	0.0100528	0.0325031
RS10395	hypothetical_protein	0.415415	9.07886	4.08887	0.0431664	0.113111
RS10400	hypothetical_protein	-0.826136	1.15358	2.26188	0.132593	0.271663
RS10405	competence_protein_CglA	-0.872973	1.88978	4.68797	0.0303745	0.0838373
RS10410	hypothetical_protein	0.00197637	4.34104	0.000111898	0.99156	1
RS10415	hypothetical_protein	1.04052	0.0930866	0.96024	0.327126	0.514531
RS10420	hypothetical_protein	0.667258	3.34654	6.67282	0.00978942	0.0318605
RS10425	hypothetical_protein	0.778402	3.72929	14.1225	0.000171279	0.000880086
RS10430	hypothetical_protein	-0.201188	7.01642	2.25976	0.132775	0.27192
RS10440	hypothetical_protein	0.0358866	3.4685	0.0211904	0.884261	0.973708
RS10445	hypothetical_protein	1.28153	0.621158	3.0793	0.0792948	0.18279
RS10450	hypothetical_protein	0.449588	1.35171	0.778101	0.377722	0.573299
RS10455	hypothetical_protein	1.18638	1.63162	5.35661	0.0206438	0.0606966
RS10460	hypothetical_protein	-0.0944161	1.42986	0.0130929	0.908902	0.993645
RS10470	IS3_family_transposase	-0.0352571	5.50358	0.0415581	0.838464	0.947948
RS10475	hypothetical_protein	-0.0024489	1.01478	1.88604e-05	0.996535	1
RS10480	site-specific_integrase	-0.224824	5.94248	1.85006	0.173777	0.336088
RS10485	hypothetical_protein	0.83511	8.23953	47.1755	6.49065e-12	1.00906e-10
RS10490	hypothetical_protein	-0.673772	0.9232	1.05191	0.305067	0.491125
RS10495	site-specific_integrase	0.138047	1.28308	0.0711847	0.78962	0.918329
RS10500	hypothetical_protein	0.906613	7.38702	32.0978	1.46601e-08	1.47084e-07
RS10505	NINE_protein	-1.68255	2.56842	10.8252	0.0010013	0.00427909
RS10510	hypothetical_protein	-1.8324	7.88265	152.462	5.02097e-35	3.81751e-33
RS10515	TetR_family_transcriptional_regulator	0.280351	4.85495	1.94432	0.1632	0.319699
RS10520	plasmid_mobilization_relaxosome_protein_MobC	-1.28094	0.551746	3.13412	0.0766698	0.178212
RS10525	hypothetical_protein	-0.690652	0.0261082	0.489314	0.484233	0.668471
RS10530	hypothetical_protein	-0.260693	5.07711	2.52773	0.111861	0.240635
RS10535	hypothetical_protein	-0.488989	5.92774	9.05327	0.00262225	0.0101269
RS10540	ABC_transporter_ATP-binding_protein	0.897541	4.09969	21.0635	4.44306e-06	3.07101e-05
RS10545	hypothetical_protein	-1.73747	0.114349	3.18225	0.0744422	0.174103
RS10550	alpha/beta_hydrolase	-1.40224	2.0438	13.3681	0.000255935	0.0012721
RS10555	hypothetical_protein	-2.71954	8.43607	352.353	1.30239e-78	5.28118e-76
RS10560	cell_wall_surface_anchor	0.64487	4.28044	8.53949	0.00347524	0.012923
RS10565	MarR_family_transcriptional_regulator	0.447439	9.39696	5.04639	0.0246773	0.0707184
RS10570	hypothetical_protein	-1.06445	-0.306907	0.626925	0.428486	0.620899
RS10575	hypothetical_protein	0.501607	5.02511	6.94232	0.00841797	0.0278463
RS10585	hypothetical_protein	-0.295449	-0.220826	0.058886	0.808265	0.925205
RS10590	tetracycline_resistance_protein	0.0584404	4.67714	0.0443905	0.833129	0.943968
RS10595	conjugal_transfer_protein	1.60972	6.06896	75.3796	3.8838e-18	1.0271e-16
RS10600	conjugal_transfer_protein	-0.164844	2.49715	0.308965	0.578316	0.760358
RS10605	hypothetical_protein	-0.19328	4.94313	0.996711	0.318108	0.505358
RS10610	hypothetical_protein	-0.295321	4.88932	3.06588	0.0799519	0.184103
RS10615	hypothetical_protein	-0.521916	4.66499	5.95416	0.0146826	0.0451329
RS10620	hypothetical_protein	0.00811983	5.82531	0.00178357	0.966313	1
RS10625	peptide_ABC_transporter_permease	0.573497	-0.0342014	0.281957	0.595422	0.771424
RS10630	IS3_family_transposase	-0.0440835	6.1897	0.0639034	0.80043	0.924547
RS10635	hypothetical_protein	-0.121187	0.431558	0.025419	0.873327	0.964552
RS10640	IS3_family_transposase	0.0893223	5.62722	0.283125	0.59466	0.771424
RS10645	IS3_family_transposase	-0.532789	5.83446	10.3298	0.001309	0.0054117
RS10650	transposase	-1.00344	5.69085	10.9153	0.000953746	0.00410338
RS10655	chromosome_partitioning_protein_ParA	0.329993	2.39495	1.09866	0.29456	0.478095
RS10660	IS3_family_transposase	0.132837	5.18909	0.497421	0.480636	0.667127
RS10665	IS3_family_transposase	-0.479717	4.74629	6.0018	0.0142913	0.0441813
RS10670	HXXEE_domain-containing_protein	0.0125248	4.57516	0.00456861	0.946111	1
RS10675	hypothetical_protein	-0.243525	2.08713	0.385239	0.534813	0.717112
RS10680	N-acetyltransferase	0.286174	6.06335	3.38547	0.0657734	0.157919
RS10685	hypothetical_protein	0.243063	5.69759	2.33203	0.126736	0.26503
RS10690	50S_ribosomal_protein_L33	0.102142	6.66999	0.554744	0.456386	0.647267
RS10695	hypothetical_protein	-0.204787	0.13327	0.041716	0.838162	0.947826
RS10700	hypothetical_protein	-0.407912	1.62278	0.927036	0.335634	0.523796
RS10705	CAAX_protease_family_protein	0.539747	4.93143	9.37506	0.00219958	0.00862461
RS10710	hypothetical_protein	-0.141828	6.04455	0.532326	0.46563	0.656357
RS10715	hypothetical_protein	-0.379188	2.47805	1.59152	0.207109	0.376415
RS10720	membrane_protein	0.0306019	7.76744	0.0548638	0.814806	0.93078
RS10725	hypothetical_protein	-0.867398	5.88609	29.8526	4.66178e-08	4.39616e-07
RS10730	hypothetical_protein	-0.0486179	2.88631	0.0253383	0.873527	0.964552
RS10735	hypothetical_protein	0.179045	1.10048	0.0580905	0.80954	0.92644
RS10740	hypothetical_protein	1.75666	-0.506124	1.15805	0.28187	0.46253
RS10745	hypothetical_protein	-0.437028	4.17606	3.1456	0.0761322	0.177338
RS10750	high-affinity_branched-chain_amino_acid_ABC_transporter_ATP-binding_protein_LivG	-0.172805	3.54906	0.452774	0.501021	0.684822
RS10755	hypothetical_protein	0.14801	6.96859	0.806031	0.369296	0.563852
RS10760	hypothetical_protein	-0.0372984	4.50187	0.0441054	0.833658	0.944049
RS10765	hypothetical_protein	0.208714	4.62367	0.964618	0.326026	0.513246
RS10770	hypothetical_protein	0.147231	5.44877	0.779936	0.377161	0.572858
RS10775	hypothetical_protein	-0.298054	5.32982	3.23141	0.0722384	0.169895
RS10780	hypothetical_protein	2.84806	5.87654	5.13196	0.0234891	0.0677523
RS10785	hypothetical_protein	-0.147716	4.85426	0.545309	0.460241	0.650649
RS10790	hypothetical_protein	-0.516955	4.74806	9.60592	0.00193951	0.00771682
RS10795	hypothetical_protein	-0.515547	5.30431	9.5935	0.00195267	0.00776283
RS10800	hypothetical_protein	0.961081	2.50343	9.56203	0.00198644	0.00788418
RS10805	hypothetical_protein	-0.669238	3.70862	9.19853	0.00242209	0.00942117
RS10810	hypothetical_protein	-0.290714	2.16897	0.61586	0.43259	0.622224
RS10815	hypothetical_protein	0.580996	7.78244	16.9722	3.79309e-05	0.000220516
RS10820	hypothetical_protein	0.573514	-0.0468891	0.281972	0.595412	0.771424
RS10825	hypothetical_protein	0.482869	6.67733	12.7945	0.000347648	0.00168828
RS10830	hypothetical_protein	0.626069	4.71505	5.26328	0.0217799	0.0634948
RS10835	hypothetical_protein	1.38253	-0.139191	1.272	0.259392	0.443826
RS10840	IS3_family_transposase	0.0188146	5.45506	0.0132677	0.908298	0.993209
RS10845	hypothetical_protein	1.33928	1.00357	4.93211	0.0263621	0.0744676
RS10850	peptide_hormone	-0.186137	1.39439	0.155019	0.693784	0.852945
RS10855	hypothetical_protein	-0.414059	4.68464	5.25387	0.021898	0.0637294
RS10860	hypothetical_protein	-0.258491	13.5192	5.18701	0.0227564	0.0659515
RS10865	membrane_protein	0.740683	11.2653	20.0664	7.48008e-06	4.93868e-05
RS10870	IS3_family_transposase	-0.235977	5.56789	1.61253	0.204136	0.373853
RS10875	hypothetical_protein	-2.01198	-0.514513	1.64396	0.199783	0.367995
RS10880	ABC_transporter_permease	-0.266938	5.74559	2.47612	0.115587	0.246363
RS10885	hypothetical_protein	1.75661	-0.520173	1.15802	0.281877	0.46253
RS10890	FanG_protein	3.68879	-0.132644	5.78992	0.0161183	0.0489326
RS10895	hypothetical_protein	-0.251368	1.1989	0.245538	0.620235	0.789862

## Sheet: combined
Supplementary Table 2: Full RNASeq dataset comparing WT COH1 and COH1Δcas9 strains grown to OD600 = 0.5
id	function	logFC_edger	logCPM_edger	LR_edger	PValue_edger	FDR_edger	baseMean_deseq	log2FoldChange_deseq	log2FoldChange_deseq_inverse	lfcSE_deseq	stat_deseq	pvalue_deseq	padj_deseq	mean_FC	norm_count_cmp	norm_count_base	mean_norm_count	signif	mean_log>1	Both
RS00040	hypothetical_protein	-1.12512	7.58625	84.2688	4.31887e-20	1.2893e-18	528.849	1.12058	-1.12058	0.107195	10.4536	1.41016e-25	1.46613e-24	-1.12285	0.0788482	0.0238336	0.0513409	1	1	TRUE
RS00245	CHAP_domain-containing_protein	1.29165	11.8699	128.043	1.09819e-29	5.55202e-28	10349.1	-1.28606	1.28606	0.0951497	-13.5162	1.25539e-41	2.38879e-40	1.28885	0.123371	0.466404	0.294887	1	1	TRUE
RS00255	aminotransferase_A	-2.57258	9.92062	448.532	1.50547e-99	1.22093e-96	2672.77	2.55473	-2.55473	0.0886594	28.815	1.38968e-182	5.60597e-180	-2.56365	0.103111	0.120453	0.111782	1	1	TRUE
RS00260	DNA_repair_protein_RecO	-2.45238	10.2133	361.718	1.18968e-80	5.78898e-78	3276.26	2.42797	-2.42797	0.111933	21.6913	2.47751e-104	3.84395e-102	-2.44018	0.106153	0.147651	0.126902	1	1	TRUE
RS00290	amidophosphoribosyltransferase	1.13118	4.45588	16.7668	4.22673e-05	0.000244267	56.7289	-1.04203	1.04203	0.285291	-3.65252	0.000259683	0.000625037	1.08661	0.0463125	0.0025566	0.0244345	1	1	TRUE
RS00300	phosphoribosylglycinamide_formyltransferase	1.26326	3.35169	21.6493	3.27327e-06	2.34922e-05	25.8226	-1.13549	1.13549	0.328432	-3.4573	0.000545615	0.00125916	1.19937	0.034836	0.00116374	0.0179999	1	1	TRUE
RS00315	hypothetical_protein	-1.42954	4.14487	41.6537	1.0896e-10	1.4606e-09	47.0513	1.35843	-1.35843	0.25943	5.2362	1.63917e-07	5.66293e-07	-1.39398	0.04308	0.00212046	0.0226002	1	1	TRUE
RS00330	sugar_ABC_transporter_substrate-binding_protein	-1.17106	2.70236	11.8463	0.000577752	0.00263728	16.3257	1.03825	-1.03825	0.393348	2.63953	0.00830209	0.0156647	-1.10466	0.0280872	0.00073575	0.0144115	1	1	TRUE
RS00380	5-(carboxyamino)imidazole_ribonucleotide_mutase	1.22137	2.31197	12.892	0.000329982	0.0016073	11.3247	-1.00989	1.00989	0.429226	-2.35283	0.0186312	0.0330511	1.11563	0.0240296	0.000510367	0.01227	1	1	TRUE
RS00450	30S_ribosomal_protein_S10	1.32311	10.6235	157.515	3.94974e-36	3.43204e-34	4357.9	-1.32084	1.32084	0.0672492	-19.641	6.90516e-86	4.64257e-84	1.32198	0.110416	0.196397	0.153407	1	1	TRUE
RS00455	50S_ribosomal_protein_L3	1.3128	11.2523	144.192	3.22541e-33	1.98669e-31	6738.71	-1.30981	1.30981	0.0762355	-17.1811	3.67937e-66	1.27953e-64	1.31131	0.116951	0.303693	0.210322	1	1	TRUE
RS00460	50S_ribosomal_protein_L4	1.25538	11.6655	128.028	1.10675e-29	5.55202e-28	8973.34	-1.25132	1.25132	0.0772869	-16.1906	5.87297e-59	1.74203e-57	1.25335	0.121247	0.404401	0.262824	1	1	TRUE
RS00465	50S_ribosomal_protein_L23	1.2108	10.754	147.612	5.76835e-34	3.89845e-32	4772.75	-1.20981	1.20981	0.0624997	-19.3571	1.77628e-83	1.05375e-81	1.2103	0.111772	0.215093	0.163433	1	1	TRUE
RS00470	50S_ribosomal_protein_L2	1.25602	12.1896	143.309	5.03088e-33	2.9854e-31	12905.1	-1.2547	1.2547	0.0616714	-20.345	5.1437e-92	4.9404e-90	1.25536	0.126694	0.581591	0.354142	1	1	TRUE
RS00475	30S_ribosomal_protein_S19	1.3252	10.8999	152.948	3.93219e-35	3.03715e-33	5277.31	-1.32297	1.32297	0.067391	-19.6312	8.36984e-86	5.4458e-84	1.32408	0.113289	0.237832	0.17556	1	1	TRUE
RS00480	50S_ribosomal_protein_L22	1.25749	11.567	145.855	1.39623e-33	9.05875e-32	8383.74	-1.25579	1.25579	0.0664558	-18.8966	1.21745e-79	6.139e-78	1.25664	0.120223	0.377829	0.249026	1	1	TRUE
RS00485	30S_ribosomal_protein_S3	1.25566	12.1572	132.571	1.12242e-30	5.87279e-29	12619	-1.25242	1.25242	0.0741204	-16.8971	4.72521e-64	1.53722e-62	1.25404	0.126357	0.568699	0.347528	1	1	TRUE
RS00490	50S_ribosomal_protein_L16	1.24367	11.5641	145.786	1.4458e-33	9.25692e-32	8367.41	-1.24239	1.24239	0.0648608	-19.1548	8.82956e-82	4.68664e-80	1.24303	0.120192	0.377093	0.248643	1	1	TRUE
RS00495	50S_ribosomal_protein_L29	1.30541	10.5561	158.512	2.39175e-36	2.11605e-34	4160.15	-1.30294	1.30294	0.0666763	-19.5414	4.88675e-85	3.08018e-83	1.30418	0.109716	0.187485	0.148601	1	1	TRUE
RS00500	30S_ribosomal_protein_S17	1.35063	11.3673	159.987	1.13898e-36	1.02635e-34	7300.1	-1.34752	1.34752	0.0724251	-18.6057	2.89105e-77	1.26766e-75	1.34907	0.118147	0.328993	0.22357	1	1	TRUE
RS00505	50S_ribosomal_protein_L14	1.27454	11.1071	149.77	1.94633e-34	1.39277e-32	6094.8	-1.27316	1.27316	0.065993	-19.2923	6.23124e-83	3.59098e-81	1.27385	0.115443	0.274674	0.195058	1	1	TRUE
RS00510	50S_ribosomal_protein_L24	1.3591	11.309	163.842	1.63767e-37	1.56253e-35	7010.6	-1.35672	1.35672	0.0700295	-19.3735	1.29057e-83	7.88814e-82	1.35791	0.117541	0.315946	0.216744	1	1	TRUE
RS00515	50S_ribosomal_protein_L5	1.28147	12.0962	153.586	2.85198e-35	2.27504e-33	12099.4	-1.28029	1.28029	0.0637582	-20.0804	1.09399e-89	9.1941e-88	1.28088	0.125722	0.545282	0.335502	1	1	TRUE
RS00520	30S_ribosomal_protein_S14_type_Z	1.24943	10.4032	109.16	1.49702e-25	6.44644e-24	3737.57	-1.24303	1.24303	0.0891579	-13.9419	3.5241e-44	7.40427e-43	1.24623	0.108126	0.168441	0.138283	1	1	TRUE
RS00525	30S_ribosomal_protein_S8	1.40089	11.5281	182.825	1.17126e-41	1.49983e-39	8160.43	-1.39943	1.39943	0.0634672	-22.0496	9.63025e-108	1.61869e-105	1.40016	0.119818	0.367765	0.243792	1	1	TRUE
RS00530	50S_ribosomal_protein_L6	1.35693	11.9769	178.303	1.13748e-40	1.31785e-38	11141.9	-1.35598	1.35598	0.0633676	-21.3986	1.37786e-101	1.9851e-99	1.35645	0.124483	0.502132	0.313307	1	1	TRUE
RS00535	50S_ribosomal_protein_L18	1.35312	10.8356	153.284	3.32105e-35	2.60649e-33	5046.89	-1.35042	1.35042	0.0723034	-18.6771	7.60921e-78	3.48813e-76	1.35177	0.11262	0.227448	0.170034	1	1	TRUE
RS00540	30S_ribosomal_protein_S5	1.28175	11.4111	154.794	1.55292e-35	1.25942e-33	7525.74	-1.28039	1.28039	0.0667715	-19.1757	5.90594e-82	3.21954e-80	1.28107	0.118603	0.339162	0.228882	1	1	TRUE
RS00545	50S_ribosomal_protein_L30	1.37424	10.3306	169.186	1.11394e-38	1.10621e-36	3557.06	-1.37181	1.37181	0.0694877	-19.7418	9.43058e-87	6.79339e-85	1.37303	0.107372	0.160306	0.133839	1	1	TRUE
RS00550	50S_ribosomal_protein_L15	1.37582	11.3719	180.907	3.07166e-41	3.73667e-39	7324.68	-1.37444	1.37444	0.0656355	-20.9405	2.28914e-97	3.07813e-95	1.37513	0.118194	0.330101	0.224147	1	1	TRUE
RS00555	preprotein_translocase_subunit_SecY	1.26254	13.5473	104.408	1.64658e-24	6.56741e-23	33056.3	-1.25484	1.25484	0.0955511	-13.1326	2.141e-39	3.72275e-38	1.25869	0.140804	1.48975	0.815276	1	1	TRUE
RS00560	adenylate_kinase	1.48955	9.3705	187.555	1.08646e-42	1.46853e-40	1827.69	-1.48544	1.48544	0.0752408	-19.7425	9.30167e-87	6.79339e-85	1.4875	0.097393	0.0823682	0.0898806	1	1	TRUE
RS00565	translation_initiation_factor_IF-1	1.14074	11.6092	100.263	1.33437e-23	4.84555e-22	8635.35	-1.13637	1.13637	0.091369	-12.4371	1.64324e-35	2.53008e-34	1.13855	0.120661	0.389169	0.254915	1	1	TRUE
RS00570	50S_ribosomal_protein_L36	1.14573	10.556	106.195	6.68366e-25	2.733e-23	4159.1	-1.14114	1.14114	0.0831842	-13.7183	7.89385e-43	1.54582e-41	1.14344	0.109714	0.187438	0.148576	1	1	TRUE
RS00575	30S_ribosomal_protein_S13	1.27269	11.6738	138.387	5.99793e-32	3.31658e-30	9023.56	-1.27042	1.27042	0.0676256	-18.7861	9.82128e-79	4.71655e-77	1.27156	0.121333	0.406664	0.263998	1	1	TRUE
RS00580	30S_ribosomal_protein_S11	1.24158	11.9989	143.702	4.1271e-33	2.47932e-31	11308.1	-1.24076	1.24076	0.0602663	-20.588	3.51739e-94	3.94143e-92	1.24117	0.124712	0.509621	0.317166	1	1	TRUE
RS00585	DNA-directed_RNA_polymerase_subunit_alpha	1.3286	12.5089	156.569	6.35696e-36	5.24288e-34	16100.8	-1.32678	1.32678	0.0634791	-20.9011	5.23166e-97	6.59517e-95	1.32769	0.130012	0.725614	0.427813	1	1	TRUE
RS00590	50S_ribosomal_protein_L17	1.31796	12.245	125.162	4.69162e-29	2.32953e-27	13402.4	-1.31201	1.31201	0.0847373	-15.4833	4.49687e-54	1.2257e-52	1.31499	0.127269	0.604004	0.365636	1	1	TRUE
RS00695	hypothetical_protein	-1.30799	4.8325	35.9775	1.99614e-09	2.2801e-08	75.3334	1.27724	-1.27724	0.242036	5.27707	1.31268e-07	4.57283e-07	-1.29262	0.0502269	0.00339504	0.026811	1	1	TRUE
RS00735	molecular_chaperone_DnaK	-1.07351	11.8122	80.7417	2.5723e-19	7.36283e-18	9925.51	1.06603	-1.06603	0.0892208	11.9483	6.62883e-33	9.3499e-32	-1.06977	0.122771	0.447312	0.285042	1	1	TRUE
RS00740	chaperone_DnaJ	-1.14329	9.95441	105.805	8.13486e-25	3.29869e-23	2737.97	1.13528	-1.13528	0.0858235	13.2281	6.04096e-40	1.07828e-38	-1.13929	0.103462	0.123392	0.113427	1	1	TRUE
RS00785	CTP_synthetase	-1.37216	12.0378	163.198	2.26426e-37	2.11883e-35	11611.1	1.36313	-1.36313	0.0800869	17.0206	5.77886e-65	1.94266e-63	-1.36765	0.125116	0.523277	0.324196	1	1	TRUE
RS01045	4-(cytidine_5-diphospho)-2-C-methyl-D-erythritol_kinase	-1.42412	8.48492	101.035	9.0377e-24	3.35706e-22	986.202	1.40564	-1.40564	0.122494	11.4751	1.75948e-30	2.24612e-29	-1.41488	0.0881886	0.0444451	0.0663168	1	1	TRUE
RS01085	DNA-directed_RNA_polymerase_subunit_beta	1.47238	11.8514	147.326	6.66106e-34	4.4401e-32	10201.2	-1.46446	1.46446	0.089317	-16.3962	2.03494e-60	6.21891e-59	1.46842	0.123178	0.459736	0.291457	1	1	TRUE
RS01355	hypothetical_protein	1.40673	3.04119	19.2201	1.1648e-05	7.39939e-05	19.6846	-1.21372	1.21372	0.373771	-3.24722	0.00116538	0.00255219	1.31022	0.0316088	0.000887124	0.016248	1	1	TRUE
RS01415	amino_acid_ABC_transporter_permease	-1.48576	10.0939	175.683	4.24641e-40	4.80536e-38	3015.71	1.47801	-1.47801	0.0856868	17.2489	1.13956e-66	4.10445e-65	-1.48188	0.104912	0.135909	0.12041	1	1	TRUE
RS01420	osmoprotectant_ABC_transporter_substrate-binding_protein	-1.30108	9.92044	145.542	1.6349e-33	1.03317e-31	2673.63	1.29608	-1.29608	0.0744671	17.4047	7.6017e-68	2.78775e-66	-1.29858	0.103109	0.120492	0.111801	1	1	TRUE
RS01425	choline_ABC_transporter_permease	-1.23142	8.92578	114.434	1.04685e-26	4.71664e-25	1339.97	1.22094	-1.22094	0.0834283	14.6346	1.68842e-48	3.82646e-47	-1.22618	0.0927707	0.0603884	0.0765796	1	1	TRUE
RS01430	glycine/betaine_ABC_transporter_ATP-binding_protein	-1.23363	10.1345	83.3809	6.76743e-20	1.99578e-18	3099.68	1.2208	-1.2208	0.109996	11.0986	1.27485e-28	1.51257e-27	-1.22721	0.105334	0.139693	0.122513	1	1	TRUE
RS01535	acetyltransferase	-1.01934	7.72591	37.5755	8.79414e-10	1.05077e-08	581.806	1.00032	-1.00032	0.153465	6.51823	7.11401e-11	3.19576e-10	-1.00983	0.0802998	0.0262202	0.05326	1	1	TRUE
RS01645	NADH_peroxidase	1.0099	6.22447	40.1475	2.35489e-10	3.03146e-09	204.455	-0.992764	0.992764	0.146555	-6.77401	1.25258e-11	6.05866e-11	1.00133	0.0646944	0.00921415	0.0369543	1	1	TRUE
RS01650	hypothetical_protein	1.07271	6.55016	34.6075	4.03357e-09	4.43056e-08	255.606	-1.0516	1.0516	0.162009	-6.49103	8.5253e-11	3.80432e-10	1.06216	0.0680796	0.0115194	0.0397995	1	1	TRUE
RS01795	multidrug_ABC_transporter_ATP-binding_protein	-1.2533	5.20883	41.143	1.41488e-10	1.86076e-09	99.1899	1.22358	-1.22358	0.205787	5.94585	2.75031e-09	1.10506e-08	-1.23844	0.0541383	0.00447018	0.0293042	1	1	TRUE
RS01800	ABC_transporter_permease	-1.31907	5.32335	59.5957	1.16492e-14	2.32315e-13	108.542	1.29619	-1.29619	0.178401	7.26562	3.71339e-13	1.97623e-12	-1.30763	0.0553286	0.00489167	0.0301101	1	1	TRUE
RS01805	sensor_histidine_kinase	-1.41202	7.68901	121.758	2.60845e-28	1.26927e-26	567.077	1.40234	-1.40234	0.105117	13.3407	1.34249e-40	2.46164e-39	-1.40718	0.0799163	0.0255564	0.0527364	1	1	TRUE
RS01815	DUF1211_domain-containing_membrane_protein	-1.10078	7.77048	87.4313	8.72578e-21	2.77514e-19	600.366	1.09409	-1.09409	0.0966751	11.3172	1.07837e-29	1.3344e-28	-1.09743	0.080763	0.0270567	0.0539098	1	1	TRUE
RS01825	DNA-directed_RNA_polymerase_subunit_omega	1.12702	9.06896	66.7595	3.06738e-16	7.11511e-15	1480.12	-1.11671	1.11671	0.115352	-9.68091	3.63464e-22	3.18742e-21	1.12186	0.0942589	0.0667043	0.0804816	1	1	TRUE
RS02875	hypothetical_protein	-2.74922	8.14239	334.324	1.09925e-74	4.11458e-72	777.434	2.71101	-2.71101	0.137968	19.6496	5.82789e-86	4.0534e-84	-2.73011	0.0846285	0.0350365	0.0598325	1	1	TRUE
RS02880	dihydroorotate_oxidase	2.47952	7.08654	120.205	5.70559e-28	2.7219e-26	370.653	-2.4038	2.4038	0.199952	-12.0219	2.72724e-33	3.9013e-32	2.44166	0.0736545	0.0167042	0.0451793	1	1	TRUE
RS02970	acetoin_reductase	-1.4268	9.87524	98.8944	2.66338e-23	9.3913e-22	2590.95	1.40749	-1.40749	0.129611	10.8593	1.80094e-27	2.04073e-26	-1.41714	0.102639	0.116766	0.109703	1	1	TRUE
RS02985	asparagine--tRNA_ligase	1.05848	9.93521	78.6901	7.26591e-19	1.97519e-17	2702.9	-1.05232	1.05232	0.0932245	-11.288	1.50406e-29	1.80576e-28	1.0554	0.103262	0.121811	0.112537	1	1	TRUE
RS02990	membrane_protein	1.53594	9.12807	144.09	3.39569e-33	2.06543e-31	1543.75	-1.52405	1.52405	0.102315	-14.8957	3.51243e-50	8.43401e-49	1.53	0.0948732	0.0695718	0.0822225	1	1	TRUE
RS02995	hypothetical_protein	1.51266	9.48537	103.148	3.10971e-24	1.22031e-22	1974.77	-1.49488	1.49488	0.12313	-12.1406	6.43515e-34	9.47423e-33	1.50377	0.0985869	0.0889966	0.0937917	1	1	TRUE
RS03025	zinc_ABC_transporter_substrate-binding_protein_AdcA	2.05292	9.59314	204.006	2.78984e-46	4.37915e-44	2137.04	-2.03086	2.03086	0.132242	-15.3572	3.17134e-53	8.09694e-52	2.04189	0.099707	0.0963099	0.0980084	1	1	TRUE
RS03090	ABC_transporter_permease	1.36084	6.90985	55.1709	1.10492e-13	1.99131e-12	334.088	-1.333	1.333	0.179961	-7.40716	1.29033e-13	7.01506e-13	1.34692	0.071818	0.0150563	0.0434372	1	1	TRUE
RS03095	ABC_transporter_ATP-binding_protein	1.39973	6.46744	44.1237	3.0826e-11	4.4776e-10	246.282	-1.36128	1.36128	0.205646	-6.61951	3.60386e-11	1.67103e-10	1.3805	0.0672198	0.0110992	0.0391595	1	1	TRUE
RS03100	peptide_ABC_transporter_permease	1.19465	7.42731	37.9059	7.42387e-10	9.00862e-09	478.685	-1.1696	1.1696	0.19284	-6.06512	1.31856e-09	5.42762e-09	1.18212	0.0771963	0.0215728	0.0493846	1	1	TRUE
RS03115	IS3_family_transposase	1.27586	3.5696	22.5544	2.04276e-06	1.51533e-05	29.4203	-1.12275	1.12275	0.323861	-3.46677	0.000526749	0.00121841	1.19931	0.0371008	0.00132588	0.0192134	1	1	TRUE
RS03120	CsbD_family_protein	-1.79471	11.023	118.854	1.12747e-27	5.32647e-26	5749.38	1.74972	-1.74972	0.163128	10.7261	7.68031e-27	8.41912e-26	-1.77221	0.114568	0.259107	0.186837	1	1	TRUE
RS03150	NUDIX_hydrolase	-1.41321	5.98321	68.2781	1.4199e-16	3.38689e-15	171.887	1.39191	-1.39191	0.161287	8.63001	6.13471e-18	4.2668e-17	-1.40256	0.0621869	0.00774643	0.0349667	1	1	TRUE
RS03155	hypothetical_protein	-1.56164	5.83207	51.1635	8.49856e-13	1.41623e-11	154.549	1.51863	-1.51863	0.206023	7.37118	1.6913e-13	9.17028e-13	-1.54013	0.0606161	0.00696506	0.0337906	1	1	TRUE
RS03165	endonuclease	1.07796	5.36775	37.8158	7.77491e-10	9.41113e-09	111.661	-1.04604	1.04604	0.182692	-5.72573	1.02991e-08	3.9568e-08	1.062	0.0557901	0.0050322	0.0304111	1	1	TRUE
RS03295	ABC_transporter_ATPase	1.13841	5.07094	34.4038	4.47847e-09	4.86434e-08	91.5683	-1.10085	1.10085	0.202411	-5.43866	5.36822e-08	1.94045e-07	1.11963	0.0527051	0.0041267	0.0284159	1	1	TRUE
RS03300	antibiotic_ABC_transporter_permease	1.16429	4.9875	26.8422	2.20758e-07	1.90126e-06	87.3492	-1.12023	1.12023	0.231204	-4.84518	1.26495e-06	3.99907e-06	1.14226	0.051838	0.00393656	0.0278873	1	1	TRUE
RS03370	hypothetical_protein	2.95991	2.83182	35.0688	3.1826e-09	3.54383e-08	15.7455	-2.27762	2.27762	0.472229	-4.82312	1.41328e-06	4.43326e-06	2.61876	0.0294328	0.000709599	0.0150712	1	1	TRUE
RS03375	hypothetical_protein	2.36097	3.5378	61.9571	3.51018e-15	7.20697e-14	28.8165	-2.09909	2.09909	0.344587	-6.09162	1.11773e-09	4.62927e-09	2.23003	0.0367703	0.00129867	0.0190345	1	1	TRUE
RS03380	peptidase_S8	2.32566	5.353	63.9687	1.26414e-15	2.70982e-14	108.147	-2.19028	2.19028	0.270261	-8.10433	5.30349e-16	3.31181e-15	2.25797	0.0556368	0.00487385	0.0302553	1	1	TRUE
RS03390	hypothetical_protein	2.01415	5.74788	71.1887	3.24644e-17	8.18507e-16	144.103	-1.93855	1.93855	0.220089	-8.80801	1.27391e-18	9.17672e-18	1.97635	0.059741	0.00649426	0.0331176	1	1	TRUE
RS03430	permease	-1.24574	3.00037	20.7605	5.20449e-06	3.56189e-05	20.9398	1.1338	-1.1338	0.349783	3.24145	0.00118921	0.00259033	-1.18977	0.0311846	0.000943692	0.0160641	1	1	TRUE
RS03445	multidrug_ABC_transporter_ATP-binding_protein	-1.34011	2.74663	19.2621	1.13946e-05	7.25733e-05	16.9015	1.18749	-1.18749	0.378611	3.13644	0.00171012	0.00362322	-1.2638	0.0285473	0.000761697	0.0146545	1	1	TRUE
RS03545	dipeptidase	-1.1738	9.50692	58.8746	1.68045e-14	3.28397e-13	2005.09	1.15705	-1.15705	0.134548	8.5995	8.00634e-18	5.49279e-17	-1.16542	0.0988109	0.0903631	0.094587	1	1	TRUE
RS03590	glutamine_ABC_transporter_permease	-1.08248	9.51857	14.3594	0.000151023	0.000787849	2029.01	0.953118	-0.953118	0.361094	2.63953	0.00830219	0.0156647	-1.0178	0.098932	0.0914412	0.0951866	1	1	TRUE
RS03600	amino_acid_ABC_transporter_substrate-binding_protein	-1.21441	9.06655	16.4744	4.93114e-05	0.000281631	1483.34	1.05054	-1.05054	0.381194	2.75592	0.00585273	0.0114389	-1.13247	0.0942338	0.0668496	0.0805417	1	1	TRUE
RS03605	arginine_ABC_transporter_ATP-binding_protein	-1.30264	8.96866	20.3155	6.56657e-06	4.39517e-05	1386.11	1.14572	-1.14572	0.360356	3.17941	0.00147578	0.00316327	-1.22418	0.0932164	0.0624677	0.0778421	1	1	TRUE
RS03655	group_II_intron_reverse_transcriptase/maturase	-1.15923	5.64255	48.0821	4.08735e-12	6.49969e-11	135.586	1.14269	-1.14269	0.165479	6.90534	5.00843e-12	2.48818e-11	-1.15096	0.0586463	0.00611043	0.0323783	1	1	TRUE
RS03660	phosphate_ABC_transporter_substrate-binding_protein	-1.48936	9.88614	143.092	5.61304e-33	3.29073e-31	2609.5	1.47886	-1.47886	0.0955348	15.4799	4.74529e-54	1.27617e-52	-1.48411	0.102752	0.117602	0.110177	1	1	TRUE
RS03665	ABC_transporter_permease	-1.77305	9.95542	132.05	1.45883e-30	7.55179e-29	2740.03	1.74293	-1.74293	0.143315	12.1615	4.98321e-34	7.44528e-33	-1.75799	0.103472	0.123485	0.113479	1	1	TRUE
RS03670	hypothetical_protein	-2.11995	7.41577	254.001	3.48542e-57	7.37394e-55	469.145	2.10555	-2.10555	0.117952	17.8509	2.84463e-71	1.06252e-69	-2.11275	0.0770764	0.0211429	0.0491096	1	1	TRUE
RS03690	phage_shock_protein_C	-2.75889	10.415	376.783	6.24115e-84	3.79618e-81	3768.69	2.7178	-2.7178	0.132398	20.5275	1.22233e-93	1.23272e-91	-2.73835	0.108249	0.169843	0.139046	1	1	TRUE
RS03715	hypothetical_protein	1.31434	11.5925	59.4821	1.23413e-14	2.44116e-13	8562.89	-1.2944	1.2944	0.170181	-7.60602	2.82673e-14	1.60155e-13	1.30437	0.120487	0.385903	0.253195	1	1	TRUE
RS03720	peptidase_U32	1.07685	6.74437	20.4365	6.16425e-06	4.16023e-05	291.743	-1.03587	1.03587	0.216679	-4.78066	1.74721e-06	5.41341e-06	1.05636	0.0700981	0.013148	0.041623	1	1	TRUE
RS03725	collagenase-like_protease	1.05717	7.85904	15.6708	7.53785e-05	0.000416809	634.899	-1.00599	1.00599	0.238767	-4.21327	2.51704e-05	6.86065e-05	1.03158	0.0816835	0.028613	0.0551482	1	1	TRUE
RS03745	bifunctional_diaminohydroxyphosphoribosylaminopyrimidine_deaminase/5-amino-6-(5-phosphoribosylamino)uracil_reductase	-1.23792	6.41938	26.7156	2.35705e-07	2.02282e-06	233.892	1.19207	-1.19207	0.222592	5.35541	8.53634e-08	3.0313e-07	-1.215	0.0667203	0.0105408	0.0386306	1	1	TRUE
RS03750	riboflavin_synthase	-1.19619	5.11896	21.0822	4.40004e-06	3.05429e-05	95.1378	1.13584	-1.13584	0.257849	4.40505	1.0576e-05	3.03871e-05	-1.16601	0.0532043	0.00428757	0.0287459	1	1	TRUE
RS03755	bifunctional_32C4-dihydroxy-2-butanone-4-phosphate_synthase/GTP_cyclohydrolase_II	-1.16015	6.6378	28.8353	7.88034e-08	7.18085e-07	273.756	1.12297	-1.12297	0.204553	5.48987	4.02239e-08	1.46978e-07	-1.14156	0.0689904	0.0123373	0.0406639	1	1	TRUE
RS03760	62C7-dimethyl-8-ribityllumazine_synthase	-1.1423	6.00462	22.8516	1.75003e-06	1.30809e-05	175.972	1.09076	-1.09076	0.232496	4.6915	2.71205e-06	8.22587e-06	-1.11653	0.0624095	0.00793049	0.03517	1	1	TRUE
RS03835	penicillin-binding_protein_2B	-1.03769	9.98223	101.018	9.11512e-24	3.36016e-22	2792.42	1.03355	-1.03355	0.0782387	13.2102	7.65996e-40	1.34349e-38	-1.03562	0.103751	0.125846	0.114798	1	1	TRUE
RS03855	MFS_transporter	2.08232	7.19639	108.299	2.31096e-25	9.69409e-24	408.364	-2.0295	2.0295	0.193407	-10.4934	9.26217e-26	9.83253e-25	2.05591	0.0747962	0.0184037	0.0465999	1	1	TRUE
RS03880	ABC_transporter_ATP-binding_protein	1.34067	6.17702	24.5181	7.3615e-07	5.96895e-06	202.402	-1.27954	1.27954	0.257913	-4.96114	7.0079e-07	2.28721e-06	1.31011	0.0642012	0.00912164	0.0366614	1	1	TRUE
RS03885	ABC_transporter_permease	1.53449	6.24355	40.3226	2.15308e-10	2.77901e-09	211.347	-1.47771	1.47771	0.232373	-6.35918	2.02829e-10	8.8743e-10	1.5061	0.0648928	0.00952474	0.0372087	1	1	TRUE
RS03960	PTS_beta-glucoside_transporter_subunit_EIIBCA	1.25614	3.55862	28.8428	7.84957e-08	7.16623e-07	30.1744	-1.14481	1.14481	0.301388	-3.79847	0.000145592	0.000366157	1.20048	0.0369868	0.00135987	0.0191733	1	1	TRUE
RS03975	glycerate_kinase	1.15252	3.26023	21.1497	4.24759e-06	2.95691e-05	24.4663	-1.05445	1.05445	0.323855	-3.25595	0.00113014	0.00248853	1.10349	0.0338855	0.00110262	0.017494	1	1	TRUE
RS04065	glycosyl_transferase	-1.1136	5.79328	40.6985	1.77626e-10	2.31104e-09	151.167	1.09591	-1.09591	0.170058	6.44437	1.16084e-10	5.12343e-10	-1.10476	0.0602128	0.00681263	0.0335127	1	1	TRUE
RS04155	bifunctional_biotin--[acetyl-CoA-carboxylase]_synthetase/biotin_operon_repressor	-1.40837	6.91133	89.6987	2.77332e-21	9.05702e-20	329.661	1.3926	-1.3926	0.133559	10.4269	1.86983e-25	1.92421e-24	-1.40048	0.0718334	0.0148568	0.0433451	1	1	TRUE
RS04365	hypothetical_protein	-1.39505	7.44306	85.1708	2.73674e-20	8.37546e-19	478.221	1.37574	-1.37574	0.137899	9.9764	1.93354e-23	1.81393e-22	-1.38539	0.0773599	0.0215519	0.0494559	1	1	TRUE
RS04420	group_II_intron_reverse_transcriptase/maturase	-1.37982	5.75925	46.6963	8.2886e-12	1.27231e-10	147.51	1.3467	-1.3467	0.192765	6.98625	2.82326e-12	1.42008e-11	-1.36326	0.0598592	0.00664784	0.0332535	1	1	TRUE
RS04480	type_II_CRISPR_RNA-guided_endonuclease_Cas9	-4.73026	5.88899	422.967	5.51739e-94	3.83538e-91	161.084	4.52464	-4.52464	0.243175	18.6065	2.84582e-77	1.26766e-75	-4.62745	0.0612076	0.00725954	0.0342336	1	1	TRUE
RS04505	nucleoside-diphosphate_kinase	-2.70782	10.8221	518.809	7.68425e-115	1.24638e-111	4995.94	2.68891	-2.68891	0.0934465	28.7749	4.42425e-182	1.48729e-179	-2.69837	0.11248	0.225152	0.168816	1	1	TRUE
RS04520	phosphohydrolase	-1.11352	6.89122	69.5233	7.55155e-17	1.86527e-15	326.289	1.10908	-1.10908	0.120258	9.2225	2.90249e-20	2.26036e-19	-1.1113	0.0716244	0.0147048	0.0431646	1	1	TRUE
RS04525	N-acetyltransferase	-1.02445	6.8102	64.4283	1.00111e-15	2.21427e-14	307.915	1.01975	-1.01975	0.115843	8.80288	1.33354e-18	9.57206e-18	-1.0221	0.0707823	0.0138768	0.0423295	1	1	TRUE
RS04530	peptide-methionine_(R)-S-oxide_reductase	-1.19302	7.34617	74.4575	6.19567e-18	1.62087e-16	447.672	1.18039	-1.18039	0.129763	9.09653	9.32675e-20	7.0722e-19	-1.18671	0.076353	0.0201752	0.0482641	1	1	TRUE
RS04535	haloacid_dehalogenase	-1.50402	8.36858	116.011	4.72734e-27	2.14984e-25	911.454	1.48524	-1.48524	0.130364	11.393	4.53155e-30	5.67711e-29	-1.49463	0.0869795	0.0410764	0.064028	1	1	TRUE
RS04590	glutamine--fructose-6-phosphate_aminotransferase	-3.23425	11.8436	267.202	4.62007e-60	1.12406e-57	10147.6	3.14379	-3.14379	0.182424	17.2334	1.49157e-66	5.27808e-65	-3.18902	0.123097	0.457322	0.290209	1	1	TRUE
RS04595	hypothetical_protein	2.49129	7.53487	255.718	1.47177e-57	3.25529e-55	509.514	-2.46022	2.46022	0.132498	-18.5681	5.82652e-77	2.50045e-75	2.47576	0.0783142	0.0229622	0.0506382	1	1	TRUE
RS04625	methyltransferase	1.22521	7.05417	86.7086	1.2575e-20	3.94773e-19	367.075	-1.21123	1.21123	0.125272	-9.6688	4.09136e-22	3.57241e-21	1.21822	0.0733181	0.0165429	0.0449305	1	1	TRUE
RS04630	cytidine_deaminase	1.08643	6.83767	56.6074	5.32099e-14	1.00356e-12	314.213	-1.07208	1.07208	0.133274	-8.04416	8.6838e-16	5.30764e-15	1.07925	0.0710678	0.0141606	0.0426142	1	1	TRUE
RS04640	sugar_ABC_transporter_ATP-binding_protein	1.8704	8.99373	175.054	5.82609e-40	6.44313e-38	1404.86	-1.85209	1.85209	0.115121	-16.0881	3.09201e-58	8.90939e-57	1.86124	0.093477	0.0633128	0.0783949	1	1	TRUE
RS04645	ABC_transporter_permease	1.9747	9.19413	164.961	9.32866e-38	9.07865e-36	1613.42	-1.95	1.95	0.127163	-15.3346	4.48961e-53	1.13194e-51	1.96235	0.0955598	0.0727118	0.0841358	1	1	TRUE
RS04650	ABC_transporter_permease	2.19919	10.0987	290.242	4.40482e-65	1.19077e-62	3035.52	-2.18075	2.18075	0.116668	-18.692	5.75417e-78	2.69911e-76	2.18997	0.104961	0.136802	0.120881	1	1	TRUE
RS04655	NADH_oxidase	1.48128	10.0883	139.254	3.87565e-32	2.16769e-30	3011.89	-1.47156	1.47156	0.114283	-12.8765	6.10518e-38	1.00936e-36	1.47642	0.104853	0.135737	0.120295	1	1	TRUE
RS04680	hypothetical_protein	-2.462	10.2313	359.542	3.54261e-80	1.56712e-77	3318.05	2.43336	-2.43336	0.118333	20.5637	5.80792e-94	6.16557e-92	-2.44768	0.10634	0.149534	0.127937	1	1	TRUE
RS04765	tetracycline_resistance_ribosomal_protection_protein_Tet(M)	1.16188	7.71012	91.3582	1.19883e-21	3.99556e-20	576.603	-1.15513	1.15513	0.0978619	-11.8037	3.73519e-32	5.12508e-31	1.15851	0.0801357	0.0259857	0.0530607	1	1	TRUE
RS04830	ABC_transporter_ATP-binding_protein	-1.03883	5.32764	37.4647	9.30845e-10	1.10746e-08	108.785	1.0215	-1.0215	0.179621	5.68699	1.293e-08	4.92073e-08	-1.03017	0.0553732	0.00490262	0.0301379	1	1	TRUE
RS04840	DNA-binding_response_regulator	-1.66019	6.20928	88.1213	6.15603e-21	1.98379e-19	202.911	1.62487	-1.62487	0.172952	9.39493	5.72557e-21	4.73298e-20	-1.64253	0.0645366	0.00914459	0.0368406	1	1	TRUE
RS04845	sensor_histidine_kinase	-1.42755	7.10446	104.838	1.32567e-24	5.33117e-23	377.398	1.41423	-1.41423	0.121953	11.5965	4.29301e-31	5.55065e-30	-1.42089	0.0738407	0.0170081	0.0454244	1	1	TRUE
RS04880	two-component_sensor_histidine_kinase	-1.10665	9.35805	102.108	5.25869e-24	1.99912e-22	1810.77	1.10177	-1.10177	0.0882731	12.4814	9.43486e-36	1.46385e-34	-1.10421	0.0972636	0.0816059	0.0894348	1	1	TRUE
RS04885	DNA-binding_response_regulator	-1.19638	7.91766	99.9556	1.55853e-23	5.61763e-22	665.799	1.19195	-1.19195	0.101449	11.7492	7.12759e-32	9.58423e-31	-1.19416	0.0822928	0.0300055	0.0561491	1	1	TRUE
RS04890	aminopeptidase	-1.00691	11.4562	87.6617	7.76656e-21	2.48632e-19	7756.65	1.00153	-1.00153	0.0733856	13.6475	2.09037e-42	4.05412e-41	-1.00422	0.11907	0.349568	0.234319	1	1	TRUE
RS05030	cell_surface_protein	-1.90371	7.97523	244.714	3.68923e-55	7.18072e-53	692.094	1.89471	-1.89471	0.0984039	19.2544	1.2957e-82	7.25952e-81	-1.89921	0.0828911	0.0311905	0.0570408	1	1	TRUE
RS05100	type_VII_secretion_protein_EssB	1.23154	6.77702	52.4953	4.31277e-13	7.36349e-12	299.592	-1.21257	1.21257	0.149629	-8.10381	5.32658e-16	3.31437e-15	1.22206	0.0704374	0.0135017	0.0419696	1	1	TRUE
RS05105	hypothetical_protein	1.37175	4.25305	33.4185	7.43121e-09	7.7764e-08	49.383	-1.27767	1.27767	0.269311	-4.74423	2.09301e-06	6.42557e-06	1.32471	0.0442044	0.00222554	0.023215	1	1	TRUE
RS05110	type_VII_secretion_protein_EssA	1.28698	5.2535	42.8284	5.97571e-11	8.40398e-10	102.138	-1.24298	1.24298	0.197755	-6.28544	3.26935e-10	1.41205e-09	1.26498	0.0546026	0.00460302	0.0296028	1	1	TRUE
RS05130	carbamoyl_phosphate_synthase_large_subunit	2.60906	7.62639	133.667	6.4616e-31	3.41762e-29	540.463	-2.53178	2.53178	0.195826	-12.9287	3.09971e-38	5.21009e-37	2.57042	0.0792654	0.024357	0.0518112	1	1	TRUE
RS05135	carbamoyl_phosphate_synthase_small_subunit	2.95897	5.98726	141.967	9.88904e-33	5.66118e-31	170.909	-2.84416	2.84416	0.22573	-12.5998	2.11586e-36	3.33414e-35	2.90156	0.062229	0.00770234	0.0349657	1	1	TRUE
RS05140	aspartate_carbamoyltransferase	2.49282	5.3992	63.0325	2.03323e-15	4.26452e-14	111.611	-2.32835	2.32835	0.287327	-8.10349	5.34046e-16	3.31437e-15	2.41059	0.056117	0.00502994	0.0305734	1	1	TRUE
RS05145	dihydroorotase	3.04552	7.61918	139.657	3.16399e-32	1.79023e-30	537.067	-2.92911	2.92911	0.221671	-13.2138	7.30406e-40	1.29231e-38	2.98732	0.0791905	0.024204	0.0516972	1	1	TRUE
RS05150	orotate_phosphoribosyltransferase	2.90516	6.16507	117.322	2.44094e-27	1.12053e-25	193.332	-2.77646	2.77646	0.23891	-11.6214	3.20873e-31	4.20261e-30	2.84081	0.0640771	0.00871287	0.036395	1	1	TRUE
RS06330	bifunctional_metallophosphatase/5-nucleotidase	2.16094	6.77836	82.7371	9.37233e-20	2.74733e-18	298.403	-2.0864	2.0864	0.208419	-10.0106	1.36961e-23	1.30924e-22	2.12367	0.0704513	0.0134481	0.0419497	1	1	TRUE
RS06390	hypothetical_protein	-1.14562	7.79486	88.9171	4.11703e-21	1.33556e-19	611.497	1.14214	-1.14214	0.104738	10.9048	1.09341e-27	1.25307e-26	-1.14388	0.0810165	0.0275583	0.0542874	1	1	TRUE
RS06395	PTS_fructose_transporter_subunit_IIC	-2.07416	8.59414	7.87259	0.00501898	0.0177102	1070.85	1.31631	-1.31631	0.553889	2.37649	0.0174783	0.0312534	-1.69523	0.0893238	0.0482598	0.0687918	1	1	TRUE
RS06400	1-phosphofructokinase	-2.35209	6.77209	23.0846	1.55031e-06	1.1714e-05	301.965	1.69979	-1.69979	0.506974	3.35281	0.000799947	0.00180077	-2.02594	0.0703862	0.0136086	0.0419974	1	1	TRUE
RS06405	DeoR_family_transcriptional_regulator	-1.933	6.46532	15.6008	7.82229e-05	0.000430094	244.868	1.38839	-1.38839	0.5087	2.72929	0.00634718	0.0123277	-1.6607	0.0671978	0.0110354	0.0391166	1	1	TRUE
RS06410	peptidoglycan_branched_peptide_synthesis_protein	-2.17259	9.62268	369.755	2.11617e-82	1.14414e-79	2173.67	2.16208	-2.16208	0.078236	27.6354	4.17933e-168	9.36633e-166	-2.16733	0.100014	0.0979606	0.0989873	1	1	TRUE
RS06415	hypothetical_protein	-1.78996	11.3544	199.378	2.85482e-45	4.34111e-43	7230.83	1.76835	-1.76835	0.114992	15.378	2.30016e-53	6.02522e-52	-1.77915	0.118013	0.325871	0.221942	1	1	TRUE
RS06460	RNA-binding_protein	1.20191	10.8651	72.5852	1.59978e-17	4.11879e-16	5148.61	-1.1892	1.1892	0.122132	-9.73701	2.09624e-22	1.87916e-21	1.19556	0.112927	0.232032	0.17248	1	1	TRUE
RS06465	30S_ribosomal_protein_S16	1.24466	10.7217	99.3394	2.12737e-23	7.61161e-22	4659.77	-1.23684	1.23684	0.0947942	-13.0476	6.55473e-39	1.12041e-37	1.24075	0.111437	0.210001	0.160719	1	1	TRUE
RS06515	50S_ribosomal_protein_L27	1.01644	10.9138	95.4454	1.52025e-22	5.20952e-21	5329.07	-1.01543	1.01543	0.0663658	-15.3005	7.58837e-53	1.8896e-51	1.01593	0.113433	0.240165	0.176799	1	1	TRUE
RS06520	hypothetical_protein	1.07811	9.92027	97.3181	5.90378e-23	2.05199e-21	2675.39	-1.07607	1.07607	0.0782036	-13.7599	4.44431e-43	8.87541e-42	1.07709	0.103107	0.120572	0.111839	1	1	TRUE
RS06525	50S_ribosomal_protein_L21	1.17092	10.4417	114.087	1.24718e-26	5.56769e-25	3841.64	-1.1679	1.1679	0.0795308	-14.6849	8.05903e-49	1.84717e-47	1.16941	0.108527	0.173131	0.140829	1	1	TRUE
RS06545	hypothetical_protein	-1.66448	9.66032	147.709	5.49264e-34	3.76439e-32	2231.24	1.64835	-1.64835	0.116053	14.2034	8.72214e-46	1.89167e-44	-1.65642	0.100405	0.100555	0.10048	1	1	TRUE
RS06595	accessory_Sec_system_protein_translocase_subunit_SecY2	-1.28793	6.64924	57.2307	3.87568e-14	7.39571e-13	276.351	1.25926	-1.25926	0.166962	7.54218	4.62169e-14	2.59664e-13	-1.2736	0.0691094	0.0124543	0.0407818	1	1	TRUE
RS06600	cell_wall_anchor	-1.01289	10.0833	63.2074	1.86044e-15	3.919e-14	2993.48	1.00327	-1.00327	0.107691	9.31619	1.20594e-20	9.61413e-20	-1.00808	0.104801	0.134907	0.119854	1	1	TRUE
RS06635	50S_ribosomal_protein_L20	1.52143	11.8459	172.86	1.75628e-39	1.85784e-37	10166.5	-1.51531	1.51531	0.0828449	-18.291	9.76531e-75	3.93933e-73	1.51837	0.123122	0.458172	0.290647	1	1	TRUE
RS06640	50S_ribosomal_protein_L35	1.39167	9.52118	134.192	4.95913e-31	2.65177e-29	2027.04	-1.38532	1.38532	0.0880478	-15.7337	8.8887e-56	2.49007e-54	1.38849	0.0989591	0.0913524	0.0951557	1	1	TRUE
RS06645	translation_initiation_factor_IF-3	1.40208	10.2348	149.811	1.90619e-34	1.38441e-32	3328.54	-1.39716	1.39716	0.0864158	-16.1678	8.5031e-59	2.48562e-57	1.39962	0.106376	0.150007	0.128192	1	1	TRUE
RS06890	30S_ribosomal_protein_S21	1.32272	11.4067	102.761	3.78209e-24	1.46061e-22	7504.42	-1.31266	1.31266	0.115659	-11.3495	7.46115e-30	9.28959e-29	1.31769	0.118556	0.338201	0.228379	1	1	TRUE
RS06925	glycerol-3-phosphate_transporter	-1.1916	6.70141	63.8919	1.3144e-15	2.80521e-14	284.609	1.17596	-1.17596	0.132141	8.89935	5.61763e-19	4.12027e-18	-1.18378	0.0696516	0.0128264	0.041239	1	1	TRUE
RS06945	hypothetical_protein	1.19388	8.88581	65.3034	6.42109e-16	1.43986e-14	1303.44	-1.179	1.179	0.126472	-9.3222	1.13956e-20	9.12098e-20	1.18644	0.0923553	0.0587419	0.0755486	1	1	TRUE
RS07010	hypothetical_protein	1.08624	6.44423	32.7379	1.0546e-08	1.07809e-07	236.778	-1.06269	1.06269	0.17046	-6.23422	4.54048e-10	1.94441e-09	1.07446	0.0669786	0.0106709	0.0388247	1	1	TRUE
RS07060	NAD(P)H-dependent_oxidoreductase	-1.5239	8.23909	146.24	1.15037e-33	7.56443e-32	831.204	1.50841	-1.50841	0.0976661	15.4446	8.20324e-54	2.1771e-52	-1.51615	0.0856336	0.0374598	0.0615467	1	1	TRUE
RS07185	oleate_hydratase	-2.08775	10.0057	297.058	1.44157e-66	4.12628e-64	2836.92	2.07125	-2.07125	0.102649	20.1779	1.53218e-90	1.34365e-88	-2.0795	0.103995	0.127851	0.115923	1	1	TRUE
RS07240	50S_ribosomal_protein_L1	1.25196	12.6655	100.689	1.07618e-23	3.93735e-22	17938.1	-1.24411	1.24411	0.0976584	-12.7395	3.56889e-37	5.80521e-36	1.24804	0.13164	0.808414	0.470027	1	1	TRUE
RS07245	50S_ribosomal_protein_L11	1.33505	11.3816	135.996	1.99895e-31	1.09291e-29	7367.26	-1.33067	1.33067	0.0791007	-16.8224	1.67195e-63	5.26926e-62	1.33286	0.118296	0.332019	0.225158	1	1	TRUE
RS07290	peptidyl-prolyl_cis-trans_isomerase	-1.06723	8.42536	67.828	1.78398e-16	4.214e-15	946.475	1.05518	-1.05518	0.11039	9.55863	1.1933e-21	1.033e-20	-1.0612	0.0875696	0.0426547	0.0651122	1	1	TRUE
RS07535	tRNA_(uridine(34)/cytosine(34)/5-carboxymethylaminomethyluridine(34)-2-O)-methyltransferase_TrmL	1.07538	7.03749	26.2687	2.97063e-07	2.50957e-06	358.33	-1.04522	1.04522	0.188534	-5.54392	2.95768e-08	1.08862e-07	1.0603	0.0731447	0.0161488	0.0446468	1	1	TRUE
RS07555	membrane_protein_insertion_efficiency_factor_YidD	1.05835	7.1637	42.3778	7.52374e-11	1.04601e-09	392.856	-1.04301	1.04301	0.140417	-7.42797	1.10279e-13	6.04435e-13	1.05068	0.0744564	0.0177048	0.0460806	1	1	TRUE
RS07560	ribosomal_large_subunit_pseudouridine_synthase_B	1.1527	8.22906	85.0927	2.84707e-20	8.60487e-19	827.711	-1.14317	1.14317	0.10311	-11.0869	1.45197e-28	1.71264e-27	1.14793	0.0855294	0.0373024	0.0614159	1	1	TRUE
RS07565	segregation/condensation_protein_B	1.11927	7.17673	62.9497	2.12051e-15	4.42851e-14	398.121	-1.1061	1.1061	0.125109	-8.84105	9.48219e-19	6.8797e-18	1.11268	0.0745918	0.0179421	0.046267	1	1	TRUE
RS07570	segregation/condensation_protein_A	1.01347	7.74633	71.804	2.37665e-17	6.05485e-16	591.946	-1.00503	1.00503	0.10191	-9.86194	6.08625e-23	5.57998e-22	1.00925	0.080512	0.0266772	0.0535946	1	1	TRUE
RS07630	acylphosphatase	-2.30474	5.86376	180.296	4.17648e-41	4.95677e-39	158.588	2.26387	-2.26387	0.169599	13.3484	1.21046e-40	2.23991e-39	-2.2843	0.0609454	0.00714707	0.0340462	1	1	TRUE
RS07665	N-acetyltransferase	1.15888	7.71644	57.7792	2.93253e-14	5.66257e-13	582.458	-1.14422	1.14422	0.149754	-7.64064	2.16138e-14	1.23499e-13	1.15155	0.0802014	0.0262496	0.0532255	1	1	TRUE
RS07680	RNA_helicase	-1.04676	10.1242	99.2139	2.26652e-23	8.05028e-22	3081.2	1.04132	-1.04132	0.0813602	12.7989	1.66334e-37	2.7276e-36	-1.04404	0.105226	0.13886	0.122043	1	1	TRUE
RS07715	hypothetical_protein	-1.61706	8.52915	197.485	7.39055e-45	1.05772e-42	1017.81	1.60932	-1.60932	0.0955397	16.8445	1.1514e-63	3.68629e-62	-1.61319	0.0886484	0.0458694	0.0672589	1	1	TRUE
RS07765	branched-chain_amino_acid_transporter	1.43735	7.99598	27.2141	1.82125e-07	1.58254e-06	711.104	-1.37227	1.37227	0.256399	-5.35207	8.69542e-08	3.08236e-07	1.40481	0.0831068	0.0320472	0.057577	1	1	TRUE
RS07770	alcohol_dehydrogenase	1.34404	7.77582	27.8768	1.29293e-07	1.14182e-06	611.002	-1.29256	1.29256	0.242938	-5.32052	1.03471e-07	3.64225e-07	1.3183	0.0808185	0.027536	0.0541773	1	1	TRUE
RS07775	ABC_transporter_permease	1.09342	7.38602	63.8298	1.35646e-15	2.88232e-14	460.382	-1.0807	1.0807	0.117759	-9.17724	4.42278e-20	3.39192e-19	1.08706	0.0767671	0.020748	0.0487576	1	1	TRUE
RS07780	methionine_import_ATP-binding_protein_MetN	1.20624	6.89955	82.2346	1.20854e-19	3.50044e-18	329.026	-1.19119	1.19119	0.118814	-10.0256	1.17589e-23	1.12942e-22	1.19871	0.0717109	0.0148282	0.0432696	1	1	TRUE
RS07785	peptidase_M20	1.15887	6.46257	68.2799	1.41859e-16	3.38689e-15	242.28	-1.14208	1.14208	0.133921	-8.52807	1.48811e-17	1.00386e-16	1.15048	0.0671692	0.0109188	0.039044	1	1	TRUE
RS07810	hypothetical_protein	1.15139	5.95669	49.7429	1.75269e-12	2.84286e-11	170.822	-1.12818	1.12818	0.161151	-7.00075	2.54595e-12	1.2838e-11	1.13978	0.0619113	0.00769841	0.0348049	1	1	TRUE
RS07850	dihydroxyacetone_kinase_subunit_L	1.1956	5.8399	20.668	5.46214e-06	3.72252e-05	158.73	-1.13973	1.13973	0.249814	-4.5623	5.05958e-06	1.48763e-05	1.16766	0.0606974	0.00715346	0.0339254	1	1	TRUE
RS07865	cupin	-1.84038	10.6762	208.175	3.43543e-47	5.57227e-45	4515.35	1.82304	-1.82304	0.106438	17.1277	9.22513e-66	3.15375e-64	-1.83171	0.110964	0.203493	0.157229	1	1	TRUE
RS07925	EamA_family_transporter	1.43636	6.07565	92.1092	8.20239e-22	2.77172e-20	184.738	-1.41249	1.41249	0.144501	-9.775	1.44161e-22	1.2981e-21	1.42443	0.0631477	0.00832558	0.0357367	1	1	TRUE
RS07955	CBS_domain-containing_protein	-1.12955	5.899	54.4854	1.56611e-13	2.76482e-12	163.005	1.11768	-1.11768	0.149193	7.49148	6.81023e-14	3.76335e-13	-1.12361	0.0613116	0.00734613	0.0343289	1	1	TRUE
RS08000	aldo/keto_reductase	-1.50775	7.62408	103.267	2.92835e-24	1.15849e-22	541.765	1.48793	-1.48793	0.134443	11.0674	1.80615e-28	2.11802e-27	-1.49784	0.0792414	0.0244157	0.0518286	1	1	TRUE
RS08100	DUF4811_domain-containing_protein	1.49108	8.00679	56.1316	6.77804e-14	1.26368e-12	706.734	-1.45368	1.45368	0.182993	-7.94392	1.95897e-15	1.183e-14	1.47238	0.0832192	0.0318503	0.0575347	1	1	TRUE
RS08105	MFS_transporter	1.22318	7.92322	36.6052	1.44646e-09	1.67185e-08	665.515	-1.19126	1.19126	0.182539	-6.52602	6.75415e-11	3.04768e-10	1.20722	0.0823505	0.0299927	0.0561716	1	1	TRUE
RS08125	30S_ribosomal_protein_S18	1.11008	11.6869	67.8742	1.7427e-16	4.13658e-15	9104.92	-1.10012	1.10012	0.116618	-9.43353	3.96531e-21	3.30497e-20	1.1051	0.121468	0.410331	0.265899	1	1	TRUE
RS08130	Single-stranded_DNA-binding_protein_1	1.01735	11.5815	74.6762	5.5462e-18	1.4588e-16	8461.99	-1.01303	1.01303	0.0885445	-11.4409	2.61141e-30	3.31272e-29	1.01519	0.120373	0.381356	0.250865	1	1	TRUE
RS08135	30S_ribosomal_protein_S6	1.0413	10.8115	78.7033	7.21756e-19	1.97307e-17	4963.1	-1.03716	1.03716	0.0918658	-11.2899	1.47171e-29	1.77751e-28	1.03923	0.11237	0.223672	0.168021	1	1	TRUE
RS08150	thiol_reductase_thioredoxin	-1.21457	11.4313	103.098	3.18962e-24	1.24165e-22	7630.15	1.19841	-1.19841	0.111663	10.7324	7.17055e-27	7.94671e-26	-1.20649	0.118812	0.343867	0.231339	1	1	TRUE
RS08230	universal_stress_protein_UspA	3.60375	9.47741	20.3318	6.5109e-06	4.36392e-05	1952.58	-2.35003	2.35003	0.546988	-4.29631	1.73664e-05	4.83872e-05	2.97689	0.0985041	0.0879967	0.0932504	1	1	TRUE
RS08235	MFS_transporter	2.95075	9.75232	23.4244	1.29921e-06	1.00031e-05	2364.24	-2.24938	2.24938	0.490276	-4.58799	4.47528e-06	1.32355e-05	2.60007	0.101361	0.106549	0.103955	1	1	TRUE
RS08240	Crp/Fnr_family_transcriptional_regulator	-1.05053	7.3327	31.0012	2.57867e-08	2.53491e-07	444.084	1.02521	-1.02521	0.178648	5.73872	9.53937e-09	3.686e-08	-1.03787	0.076213	0.0200135	0.0481132	1	1	TRUE
RS08290	hypothetical_protein	-1.06013	5.18406	32.9848	9.28823e-09	9.57554e-08	97.7945	1.04238	-1.04238	0.192468	5.41585	6.09984e-08	2.18921e-07	-1.05126	0.0538809	0.0044073	0.0291441	1	1	TRUE
RS08300	cyclopropane-fatty-acyl-phospholipid_synthase	-1.15089	9.4598	107.919	2.80032e-25	1.15478e-23	1943.59	1.14396	-1.14396	0.0933749	12.2512	1.65441e-34	2.50899e-33	-1.14742	0.0983211	0.0875918	0.0929565	1	1	TRUE
RS08305	MerR_family_transcriptional_regulator	1.01314	6.90806	37.1685	1.08348e-09	1.27657e-08	328.302	-0.999961	0.999961	0.144621	-6.91434	4.70059e-12	2.34101e-11	1.00655	0.0717994	0.0147956	0.0432975	1	1	TRUE
RS08315	hypothetical_protein	1.26079	7.66173	90.5235	1.8279e-21	6.05074e-20	557.497	-1.25077	1.25077	0.116322	-10.7527	5.75819e-27	6.41672e-26	1.25578	0.0796328	0.0251247	0.0523787	1	1	TRUE
RS08370	type_I_glutamate--ammonia_ligase	-1.06331	11.3494	50.5716	1.14895e-12	1.88243e-11	7212.72	1.03921	-1.03921	0.147981	7.0226	2.17771e-12	1.10363e-11	-1.05126	0.117961	0.325055	0.221508	1	1	TRUE
RS08375	MerR_family_transcriptional_regulator	-1.13832	9.90531	42.1958	8.25751e-11	1.13827e-09	2651.01	1.10322	-1.10322	0.175345	6.29169	3.14031e-10	1.35923e-09	-1.12077	0.102952	0.119473	0.111212	1	1	TRUE
RS09005	22C3-cyclic-nucleotide_2-phosphodiesterase	2.29874	6.68185	83.7236	5.69006e-20	1.68828e-18	278.821	-2.2102	2.2102	0.220165	-10.0388	1.02887e-23	9.9771e-23	2.25447	0.0694483	0.0125656	0.041007	1	1	TRUE
RS09045	PTS_mannose_transporter_subunit_IID	1.27303	2.8894	8.24619	0.00408376	0.0147525	18.7146	-1.08006	1.08006	0.446895	-2.41682	0.0156569	0.0283992	1.17655	0.0300311	0.000843411	0.0154373	1	1	TRUE
RS09130	phosphate_ABC_transporter2C_permease_protein_PstA	-1.24946	3.41639	21.4282	3.67333e-06	2.60181e-05	27.1575	1.19324	-1.19324	0.327667	3.64163	0.000270918	0.000650527	-1.22135	0.0355085	0.00122391	0.0183662	1	1	TRUE
RS09140	phosphate-binding_protein	-1.55743	2.90471	29.2004	6.52665e-08	6.03778e-07	19.3648	1.37435	-1.37435	0.364567	3.76981	0.000163373	0.000407413	-1.46589	0.0301903	0.000872711	0.0155315	1	1	TRUE
RS09280	hypothetical_protein	-1.29867	2.03158	12.0348	0.00052216	0.00240837	9.63828	1.0769	-1.0769	0.453035	2.37709	0.0174499	0.0312303	-1.18779	0.0211153	0.000434367	0.0107748	1	1	TRUE
RS09425	hypothetical_protein	1.15634	4.48314	24.0365	9.45285e-07	7.49146e-06	58.2725	-1.0819	1.0819	0.256233	-4.22235	2.41765e-05	6.61655e-05	1.11912	0.0465959	0.00262616	0.024611	1	1	TRUE
RS09430	YydG_family_peptide_radical_SAM_peptide_maturase	1.45653	4.51709	23.1991	1.46064e-06	1.11055e-05	59.7257	-1.34885	1.34885	0.303155	-4.44936	8.61278e-06	2.48526e-05	1.40269	0.0469487	0.00269166	0.0248202	1	1	TRUE
RS09525	PAP2_family_phosphoesterase	-1.23328	5.51725	50.9292	9.57596e-13	1.57955e-11	123.772	1.21318	-1.21318	0.177919	6.81871	9.18595e-12	4.4971e-11	-1.22323	0.0573439	0.00557802	0.031461	1	1	TRUE
RS09545	rhodanese	1.28741	8.96093	33.3123	7.84847e-09	8.1604e-08	1369.79	-1.24555	1.24555	0.200868	-6.20084	5.61609e-10	2.3698e-09	1.26648	0.0931361	0.0617322	0.0774341	1	1	TRUE
RS09550	hypothetical_protein	1.2472	10.0084	42.388	7.48463e-11	1.04356e-09	2836.27	-1.21713	1.21713	0.171603	-7.09274	1.31484e-12	6.71399e-12	1.23217	0.104023	0.127822	0.115923	1	1	TRUE
RS09565	cyclic_nucleotide-binding_protein	-2.65426	7.94029	181.302	2.51862e-41	3.14246e-39	674.53	2.59373	-2.59373	0.174348	14.8768	4.66429e-50	1.10681e-48	-2.62399	0.0825279	0.030399	0.0564635	1	1	TRUE
RS09570	bifunctional_homocysteine_S-methyltransferase/methylenetetrahydrofolate_reductase	1.08933	4.64397	36.7772	1.32433e-09	1.54167e-08	67.2474	-1.04207	1.04207	0.213556	-4.87961	1.06294e-06	3.37631e-06	1.0657	0.0482674	0.00303063	0.025649	1	1	TRUE
RS09595	DNA-binding_response_regulator	-1.32169	6.22268	87.1816	9.9002e-21	3.12821e-19	204.025	1.31024	-1.31024	0.135297	9.68412	3.52231e-22	3.1024e-21	-1.31596	0.0646759	0.0091948	0.0369353	1	1	TRUE
RS09600	two-component_sensor_histidine_kinase	-1.20421	7.42423	52.8176	3.66006e-13	6.27108e-12	472.094	1.188	-1.188	0.14959	7.94169	1.99449e-15	1.20086e-14	-1.1961	0.0771642	0.0212758	0.04922	1	1	TRUE
RS09605	hypothetical_protein	-1.33325	7.08257	109.239	1.43878e-25	6.25098e-24	371.777	1.32315	-1.32315	0.112239	11.7886	4.46829e-32	6.04869e-31	-1.3282	0.0736132	0.0167548	0.045184	1	1	TRUE
RS09620	MFS_transporter	1.05277	7.0228	22.5543	2.04286e-06	1.51533e-05	354.237	-1.01924	1.01924	0.198572	-5.13284	2.85397e-07	9.65847e-07	1.036	0.072992	0.0159644	0.0444782	1	1	TRUE
RS09660	penicillin-binding_protein_2A	-1.07737	8.91609	80.0105	3.72428e-19	1.04151e-17	1331.6	1.07004	-1.07004	0.100172	10.682	1.23576e-26	1.33291e-25	-1.0737	0.09267	0.0600113	0.0763407	1	1	TRUE
RS09695	GntR_family_transcriptional_regulator	-1.31542	6.8624	86.464	1.42303e-20	4.43052e-19	318.839	1.30451	-1.30451	0.126805	10.2875	8.0209e-25	8.08908e-24	-1.30996	0.0713248	0.0143691	0.042847	1	1	TRUE
RS09700	hypothetical_protein	-1.22222	5.44388	43.1303	5.12121e-11	7.29272e-10	118.109	1.19085	-1.19085	0.192437	6.18828	6.0825e-10	2.5506e-09	-1.20653	0.0565814	0.0053228	0.0309521	1	1	TRUE
RS09765	anaerobic_ribonucleoside-triphosphate_reductase	2.22092	9.78278	113.042	2.11252e-26	9.345e-25	2424.35	-2.16317	2.16317	0.182311	-11.8652	1.79386e-32	2.51265e-31	2.19204	0.101678	0.109258	0.105468	1	1	TRUE
RS09780	hypothetical_protein	-1.41207	11.1953	157.436	4.11059e-36	3.50915e-34	6476.64	1.39804	-1.39804	0.098479	14.1963	9.65329e-46	2.07135e-44	-1.40506	0.116359	0.291882	0.204121	1	1	TRUE
RS09785	Holliday_junction_resolvase_RuvX	-1.487	10.4304	189.407	4.28355e-43	5.95536e-41	3807.96	1.47795	-1.47795	0.0732141	20.1867	1.28173e-90	1.17512e-88	-1.48248	0.108409	0.171613	0.140011	1	1	TRUE
RS09790	hypothetical_protein	-1.67498	9.65293	229.957	6.09173e-52	1.09787e-49	2221.5	1.66377	-1.66377	0.0924435	17.9977	2.02945e-72	7.87191e-71	-1.66938	0.100328	0.100116	0.100222	1	1	TRUE
RS09795	arsenate_reductase	-2.97153	11.7013	317.492	5.09593e-71	1.65312e-68	9195.19	2.91323	-2.91323	0.153481	18.981	2.44717e-80	1.26563e-78	-2.94238	0.121619	0.414399	0.268009	1	1	TRUE
RS09850	bacteriocin_immunity_protein	-1.14696	7.43974	67.2054	2.4464e-16	5.75082e-15	476.987	1.13266	-1.13266	0.129945	8.71648	2.86975e-18	2.03097e-17	-1.13981	0.0773255	0.0214964	0.0494109	1	1	TRUE
RS09875	50S_ribosomal_protein_L32	1.15032	11.5284	80.1656	3.4431e-19	9.68447e-18	8155.33	-1.142	1.142	0.103389	-11.0457	2.30061e-28	2.68227e-27	1.14616	0.119821	0.367536	0.243679	1	1	TRUE
RS09880	50S_ribosomal_protein_L33	1.01822	10.6033	64.9776	7.57528e-16	1.68317e-14	4294.68	-1.01178	1.01178	0.104328	-9.69807	3.07266e-22	2.7302e-21	1.015	0.110206	0.193548	0.151877	1	1	TRUE
RS09915	hypothetical_protein	-1.60663	2.94987	35.7107	2.289e-09	2.59029e-08	19.5035	1.4763	-1.4763	0.358536	4.11758	3.82866e-05	0.000102284	-1.54147	0.0306596	0.000878961	0.0157693	1	1	TRUE
RS09925	hypothetical_protein	-1.83421	1.87674	20.1449	7.17916e-06	4.77237e-05	8.5868	1.43503	-1.43503	0.471923	3.04081	0.0023594	0.004861	-1.63462	0.019506	0.000386981	0.0099465	1	1	TRUE
RS09930	site-specific_integrase	-1.96053	10.5823	300.994	2.00036e-67	6.08361e-65	4230.74	1.95118	-1.95118	0.0822382	23.7259	1.94828e-124	3.92968e-122	-1.95585	0.109987	0.190666	0.150327	1	1	TRUE
RS09935	peptidase	-1.10002	2.87251	11.3355	0.000760402	0.00337602	18.9847	0.910318	-0.910318	0.385958	2.35859	0.0183444	0.032571	-1.00517	0.0298556	0.000855584	0.0153556	1	1	TRUE
RS09965	sensor_histidine_kinase	-1.12614	6.39223	37.1692	1.08311e-09	1.27657e-08	228.545	1.10468	-1.10468	0.167376	6.60001	4.11142e-11	1.87618e-10	-1.11541	0.0664381	0.0102998	0.038369	1	1	TRUE
RS09985	hypothetical_protein	-1.03623	9.59882	70.9427	3.67747e-17	9.1767e-16	2140.49	1.02598	-1.02598	0.109589	9.36204	7.82122e-21	6.41277e-20	-1.0311	0.0997661	0.0964653	0.0981157	1	1	TRUE
RS09990	hypothetical_protein	-1.14702	7.99305	66.9135	2.8369e-16	6.6367e-15	702.213	1.13237	-1.13237	0.132394	8.55304	1.19885e-17	8.11437e-17	-1.1397	0.0830763	0.0316466	0.0573615	1	1	TRUE
RS10075	hypothetical_protein	1.42187	5.13467	43.1832	4.98458e-11	7.13382e-10	94.3872	-1.36411	1.36411	0.22211	-6.14161	8.16896e-10	3.4043e-09	1.39299	0.0533675	0.00425374	0.0288106	1	1	TRUE
RS10085	hypothetical_protein	-1.79614	1.33155	7.96641	0.00476533	0.0169009	4.97673	1.21021	-1.21021	0.555345	2.17921	0.0293162	0.0493551	-1.50317	0.0138396	0.000224286	0.00703195	1	1	TRUE
RS10135	30S_ribosomal_protein_S4	1.23365	12.3117	120.663	4.52982e-28	2.18239e-26	14042	-1.22954	1.22954	0.0783314	-15.6966	1.59491e-55	4.40675e-54	1.23159	0.127962	0.63283	0.380396	1	1	TRUE
RS10175	L-serine_dehydratase2C_iron-sulfur-dependent_subunit_beta	-1.07011	8.4877	68.5672	1.22625e-16	2.95393e-15	988.031	1.05932	-1.05932	0.104524	10.1346	3.87808e-24	3.79713e-23	-1.06471	0.0882175	0.0445275	0.0663725	1	1	TRUE
RS10180	L-serine_dehydratase2C_iron-sulfur-dependent_subunit_alpha	-1.02002	9.23967	65.2538	6.58478e-16	1.4698e-14	1666.11	1.00919	-1.00919	0.102452	9.85037	6.82893e-23	6.23256e-22	-1.01461	0.0960332	0.0750863	0.0855598	1	1	TRUE
RS10185	transglycosylase	2.31554	8.68789	86.3475	1.50942e-20	4.64864e-19	1150.58	-2.22929	2.22929	0.234177	-9.51967	1.73723e-21	1.49106e-20	2.27241	0.0902982	0.051853	0.0710756	1	1	TRUE
RS10360	hypothetical_protein	-3.97032	11.3058	725.309	9.38115e-160	4.56487e-156	6986.56	3.91832	-3.91832	0.127658	30.6938	6.8848e-207	3.47166e-204	-3.94432	0.117508	0.314863	0.216185	1	1	TRUE
RS10505	NINE_protein	-1.68255	2.56842	10.8252	0.0010013	0.00427909	15.9673	1.23284	-1.23284	0.484301	2.54561	0.0109086	0.0203351	-1.4577	0.0266951	0.000719597	0.0137073	1	1	TRUE
RS10510	hypothetical_protein	-1.8324	7.88265	152.462	5.02097e-35	3.81751e-33	649.743	1.80243	-1.80243	0.142955	12.6083	1.9002e-36	3.01788e-35	-1.81741	0.0819289	0.0292819	0.0556054	1	1	TRUE
RS10550	alpha/beta_hydrolase	-1.40224	2.0438	13.3681	0.000255935	0.0012721	9.81666	1.14495	-1.14495	0.457315	2.50364	0.0122923	0.0227255	-1.27359	0.0212424	0.000442407	0.0108424	1	1	TRUE
RS10555	hypothetical_protein	-2.71954	8.43607	352.353	1.30239e-78	5.28118e-76	954.159	2.68348	-2.68348	0.13434	19.9752	9.04662e-89	7.01809e-87	-2.70151	0.0876809	0.043001	0.0653409	1	1	TRUE
RS10595	conjugal_transfer_protein	1.60972	6.06896	75.3796	3.8838e-18	1.0271e-16	185.011	-1.57173	1.57173	0.180387	-8.71311	2.95641e-18	2.08499e-17	1.59072	0.0630782	0.00833787	0.035708	1	1	TRUE
RS00005	chromosomal_replication_initiator_protein_DnaA	0.297904	9.01491	6.95789	0.00834504	0.0276803	1426.82	-0.296946	0.296946	0.0849393	-3.49598	0.000472331	0.00110265	0.297425	0.0936971	0.0643024	0.0789998	1	0	FALSE
RS00010	DNA_polymerase_III_subunit_beta	0.531478	9.73601	14.4281	0.000145613	0.000761884	2351.17	-0.526422	0.526422	0.119541	-4.40368	1.06429e-05	3.05358e-05	0.52895	0.101192	0.10596	0.103576	1	0	FALSE
RS00015	diacylglycerol_kinase	-0.105868	6.25267	0.370179	0.542906	0.725565	210.048	0.100078	-0.100078	0.173722	0.576082	0.56456	0.649582	-0.102973	0.0649875	0.0094662	0.0372269	0	0	FALSE
RS00020	hypothetical_protein	-0.112894	4.8507	0.288316	0.591301	0.770148	77.4362	0.117372	-0.117372	0.227132	0.516754	0.605328	0.686311	-0.115133	0.0504161	0.00348981	0.0269529	0	0	FALSE
RS00025	GTP-binding_protein_YchF	-0.0611116	9.96372	0.257579	0.611789	0.783205	2754.58	0.0585181	-0.0585181	0.0940765	0.622026	0.533925	0.622607	-0.0598148	0.103559	0.124141	0.11385	0	0	FALSE
RS00030	aminoacyl-tRNA_hydrolase	-0.0342223	5.49972	0.0421173	0.837396	0.947401	123.227	0.0380816	-0.0380816	0.172503	0.220759	0.82528	0.866072	-0.036152	0.0571617	0.00555346	0.0313576	0	0	FALSE
RS00035	transcription-repair_coupling_factor	-0.145139	9.1059	1.75863	0.184795	0.351943	1520.27	0.143851	-0.143851	0.0841212	1.71004	0.0872579	0.133535	-0.144495	0.0946428	0.0685141	0.0815785	0	0	FALSE
RS00045	septum_formation_initiation_protein	-0.706486	7.29324	25.6178	4.16183e-07	3.47366e-06	430.434	0.700501	-0.700501	0.11875	5.89898	3.65759e-09	1.45798e-08	-0.703493	0.0758028	0.0193983	0.0476006	1	0	FALSE
RS00050	hypothetical_protein	-0.505221	5.28932	8.02293	0.00461889	0.016514	105.453	0.503605	-0.503605	0.182505	2.7594	0.00579074	0.0113287	-0.504413	0.0549749	0.00475242	0.0298637	1	0	FALSE
RS00055	serine_hydrolase	-0.219131	8.75268	4.31032	0.0378818	0.101226	1189.52	0.218565	-0.218565	0.0779266	2.80475	0.0050355	0.00993798	-0.218848	0.0909716	0.0536081	0.0722899	0	0	FALSE
RS00060	tRNA(Ile)-lysidine_synthetase	-0.19142	8.34548	2.92613	0.0871561	0.197165	896.36	0.190872	-0.190872	0.0877946	2.17407	0.0296998	0.0497958	-0.191146	0.0867393	0.0403962	0.0635677	0	0	FALSE
RS00065	hypoxanthine-guanine_phosphoribosyltransferase	-0.273841	9.27737	6.68741	0.00970963	0.0316245	1712.38	0.270117	-0.270117	0.0815562	3.31203	0.000926213	0.00206885	-0.271979	0.096425	0.0771715	0.0867982	1	0	FALSE
RS00070	cell_division_protein_FtsH	-0.0508187	11.1616	0.256077	0.612828	0.784107	6328.75	0.0476563	-0.0476563	0.0721989	0.660069	0.509209	0.601332	-0.0492375	0.116009	0.285217	0.200613	0	0	FALSE
RS00250	ribose-phosphate_pyrophosphokinase_1	0.0289085	11.0479	0.0601823	0.806208	0.925205	5844.79	-0.03057	0.03057	0.0927915	-0.329448	0.741817	0.798849	0.0297393	0.114828	0.263407	0.189117	0	0	FALSE
RS00265	CPBP_family_intramembrane_metalloprotease	-0.525132	2.43592	2.25094	0.133534	0.273017	12.962	0.430251	-0.430251	0.418458	1.02818	0.303864	0.395415	-0.477692	0.0253179	0.000584157	0.012951	0	0	FALSE
RS00270	phosphate_acyltransferase	-0.733633	8.94129	43.1287	5.12558e-11	7.29272e-10	1355.55	0.727833	-0.727833	0.0898954	8.09644	5.65886e-16	3.4905e-15	-0.730733	0.0929319	0.0610903	0.0770111	1	0	FALSE
RS00275	acyl_carrier_protein	-0.429388	9.58285	16.0761	6.08467e-05	0.000342685	2117.07	0.426293	-0.426293	0.0849784	5.01649	5.26251e-07	1.74008e-06	-0.427841	0.0996	0.0954099	0.0975049	1	0	FALSE
RS00280	phosphoribosylaminoimidazolesuccinocarboxamide_synthase	-0.419494	2.80469	1.51736	0.218019	0.390461	17.9812	0.386573	-0.386573	0.388846	0.994152	0.320149	0.413406	-0.403033	0.0291508	0.000810355	0.0149806	0	0	FALSE
RS00285	phosphoribosylformylglycinamidine_synthase	0.981109	5.08304	21.1787	4.18381e-06	2.92086e-05	90.0019	-0.939452	0.939452	0.214993	-4.36968	1.24426e-05	3.53475e-05	0.960281	0.0528309	0.00405611	0.0284435	1	0	FALSE
RS00295	phosphoribosylformylglycinamidine_cyclo-ligase	0.796468	4.06806	10.6162	0.00112103	0.00473931	43.5279	-0.743253	0.743253	0.278864	-2.66529	0.00769219	0.0146646	0.769861	0.0422816	0.00196167	0.0221217	1	0	FALSE
RS00305	GNAT_family_acetyltransferase	-0.246385	5.07263	0.922738	0.336757	0.525084	89.3592	0.242351	-0.242351	0.254051	0.953947	0.34011	0.435557	-0.244368	0.0527227	0.00402715	0.0283749	0	0	FALSE
RS00310	bifunctional_phosphoribosylaminoimidazolecarboxamide_formyltransferase/inosine_monophosphate_cyclohydrolase	-0.347981	6.98583	5.95693	0.0146595	0.0451191	347.833	0.346772	-0.346772	0.12398	2.79699	0.00515808	0.01016	-0.347377	0.0726078	0.0156757	0.0441417	1	0	FALSE
RS00320	peptidoglycan-binding_protein_LysM	-0.470889	9.37507	16.0173	6.27673e-05	0.000353093	1832.07	0.467014	-0.467014	0.0981528	4.75803	1.95492e-06	6.01995e-06	-0.468951	0.0974405	0.0825657	0.0900031	1	0	FALSE
RS00325	N-acetylmannosamine-6-phosphate_2-epimerase	-0.566472	2.2774	2.68822	0.101093	0.221885	11.9511	0.442933	-0.442933	0.423205	1.04662	0.295277	0.385484	-0.504703	0.0236704	0.000538598	0.0121045	0	0	FALSE
RS00335	sugar_ABC_transporter_permease	0.0880165	1.26755	0.0314625	0.859213	0.960272	4.75864	-0.0607038	0.0607038	0.532273	-0.114046	0.909201	0.936598	0.0743602	0.0131744	0.000214457	0.0066944	0	0	FALSE
RS00340	sugar_ABC_transporter_permease	-0.585982	1.35342	1.02944	0.310291	0.496017	5.37144	0.404981	-0.404981	0.539258	0.750996	0.452655	0.549341	-0.495481	0.0140669	0.000242074	0.00715448	0	0	FALSE
RS00345	hypothetical_protein	0.185203	1.30128	0.118858	0.730276	0.875408	4.31335	-0.0217294	0.0217294	0.550621	-0.0394635	0.968521	0.977731	0.103466	0.013525	0.000194389	0.00685967	0	0	FALSE
RS00350	hypothetical_protein	-0.73579	1.95849	2.78847	0.094945	0.210384	8.903	0.652389	-0.652389	0.481992	1.35353	0.175888	0.246725	-0.69409	0.0203557	0.000401231	0.0103785	0	0	FALSE
RS00355	N-acetylneuraminate_lyase	-0.747152	2.00874	1.98874	0.158473	0.311946	10.4205	0.497109	-0.497109	0.497278	0.999661	0.317475	0.410742	-0.62213	0.020878	0.00046962	0.0106738	0	0	FALSE
RS00360	sugar_kinase	-0.774651	2.34347	5.41382	0.019978	0.0589884	11.8111	0.709309	-0.709309	0.421546	1.68264	0.0924457	0.140349	-0.74198	0.024357	0.000532292	0.0124446	0	0	FALSE
RS00365	acetylxylan_esterase	-0.256378	3.45083	0.922638	0.336783	0.525084	27.9868	0.253629	-0.253629	0.313992	0.807757	0.41923	0.518063	-0.255004	0.0358664	0.00126128	0.0185638	0	0	FALSE
RS00370	MurR/RpiR_family_transcriptional_regulator	0.542106	7.18388	12.3439	0.000442429	0.00209566	400.601	-0.531874	0.531874	0.141578	-3.75677	0.000172122	0.000428606	0.53699	0.0746662	0.0180539	0.04636	1	0	FALSE
RS00375	phosphoribosylamine--glycine_ligase	0.654174	3.4244	8.26057	0.00405154	0.0146782	27.5735	-0.583345	0.583345	0.300231	-1.94299	0.0520172	0.0834676	0.61876	0.0355918	0.00124265	0.0184172	0	0	FALSE
RS00385	5-(carboxyamino)imidazole_ribonucleotide_synthase	0.75115	3.71775	9.73555	0.00180738	0.00723249	34.3951	-0.694243	0.694243	0.295262	-2.35128	0.0187091	0.0331311	0.722696	0.0386407	0.00155008	0.0200954	1	0	FALSE
RS00390	hypothetical_protein	0.237194	7.12516	3.14204	0.0762985	0.177556	383.207	-0.237038	0.237038	0.117146	-2.02344	0.0430274	0.0698762	0.237116	0.0740559	0.01727	0.0456629	0	0	FALSE
RS00395	hypothetical_protein	0.493564	6.56125	8.15013	0.00430582	0.0154173	257.6	-0.484796	0.484796	0.157641	-3.07532	0.00210277	0.00437161	0.48918	0.0681948	0.0116093	0.039902	1	0	FALSE
RS00400	adenylosuccinate_lyase	0.513785	8.19509	22.283	2.35274e-06	1.72416e-05	808.146	-0.511953	0.511953	0.0848306	-6.035	1.58963e-09	6.47735e-09	0.512869	0.0851762	0.0364206	0.0607984	1	0	FALSE
RS00405	transcriptional_regulator	0.00434248	5.1413	0.000591501	0.980597	1	96.1145	-0.00760704	0.00760704	0.192522	-0.0395126	0.968482	0.977731	0.00597476	0.0534364	0.00433158	0.028884	0	0	FALSE
RS00410	Holliday_junction_branch_migration_DNA_helicase_RuvB	-0.112929	8.33687	0.756478	0.384433	0.581308	890.436	0.111407	-0.111407	0.111534	0.998857	0.317864	0.410982	-0.112168	0.0866499	0.0401292	0.0633896	0	0	FALSE
RS00415	hypothetical_protein	-0.525951	8.00931	15.1299	0.00010036	0.000542614	710.935	0.516079	-0.516079	0.131782	3.91617	8.99662e-05	0.000231162	-0.521015	0.0832454	0.0320397	0.0576425	1	0	FALSE
RS00420	membrane_protein	-0.439782	7.7871	10.3889	0.00126775	0.00525907	607.921	0.433245	-0.433245	0.124094	3.49127	0.000480722	0.00111965	-0.436513	0.0809358	0.0273971	0.0541664	1	0	FALSE
RS00425	acyltransferase	-0.280055	10.8166	7.42876	0.00641896	0.0219962	4982.64	0.275924	-0.275924	0.0800787	3.44566	0.000569665	0.00131017	-0.277989	0.112423	0.224552	0.168488	1	0	FALSE
RS00430	bifunctional_acetaldehyde-CoA/alcohol_dehydrogenase	-0.0344738	9.86617	0.0253219	0.873568	0.964552	2568.36	0.0362615	-0.0362615	0.195652	0.185337	0.852965	0.889571	-0.0353677	0.102545	0.115748	0.109146	0	0	FALSE
RS00435	zinc-dependent_alcohol_dehydrogenase	-0.393399	6.38141	3.5146	0.0608305	0.149119	228.901	0.378327	-0.378327	0.204625	1.84888	0.064475	0.101519	-0.385863	0.0663256	0.0103158	0.0383207	0	0	FALSE
RS00440	threonine_synthase	-0.641232	8.06656	22.2213	2.42969e-06	1.77788e-05	737.839	0.636381	-0.636381	0.117159	5.43176	5.58004e-08	2.00981e-07	-0.638807	0.0838404	0.0332521	0.0585463	1	0	FALSE
RS00445	MATE_family_efflux_transporter	-0.356823	8.21604	10.5254	0.00117744	0.00494343	819.889	0.35559	-0.35559	0.0948843	3.74762	0.000178523	0.000442903	-0.356207	0.085394	0.0369499	0.061172	1	0	FALSE
RS00680	hypothetical_protein	-0.497848	2.94985	3.56732	0.0589273	0.145332	19.7743	0.409266	-0.409266	0.347583	1.17746	0.239012	0.32011	-0.453557	0.0306595	0.000891169	0.0157753	0	0	FALSE
RS00685	hypothetical_protein	-0.552113	4.50374	7.41962	0.00645164	0.0220616	61.6817	0.525933	-0.525933	0.229669	2.28997	0.0220233	0.0383269	-0.539023	0.04681	0.0027798	0.0247949	1	0	FALSE
RS00690	hypothetical_protein	-0.683485	4.64053	12.5458	0.000397106	0.00190002	66.5461	0.673963	-0.673963	0.217998	3.0916	0.00199083	0.00415684	-0.678724	0.0482317	0.00299903	0.0256153	1	0	FALSE
RS00700	hypothetical_protein	-0.647206	9.74481	21.617	3.32889e-06	2.37862e-05	2372	0.631031	-0.631031	0.140195	4.5011	6.76019e-06	1.97042e-05	-0.639118	0.101283	0.106899	0.104091	1	0	FALSE
RS00705	hypothetical_protein	-0.263769	1.41044	0.202662	0.652581	0.81983	5.87062	0.178178	-0.178178	0.538227	0.331046	0.74061	0.79848	-0.220974	0.0146596	0.000264571	0.00746206	0	0	FALSE
RS00710	histidine_phosphatase_family_protein	-1.00134	7.17239	64.4064	1.01228e-15	2.22884e-14	396.067	0.994677	-0.994677	0.107773	9.22934	2.72297e-20	2.12877e-19	-0.99801	0.0745467	0.0178495	0.0461981	1	0	FALSE
RS00715	D-alanyl-D-alanine_carboxypeptidase	-0.812627	8.15468	50.5431	1.16574e-12	1.90352e-11	785.088	0.808271	-0.808271	0.0939191	8.60604	7.56257e-18	5.20604e-17	-0.810449	0.0847562	0.0353815	0.0600689	1	0	FALSE
RS00720	N-acetylmuramoyl-L-alanine_amidase	-0.589103	8.21986	19.2697	1.13493e-05	7.23799e-05	820.553	0.58089	-0.58089	0.11653	4.98488	6.20012e-07	2.03675e-06	-0.584996	0.0854337	0.0369798	0.0612068	1	0	FALSE
RS00725	heat-inducible_transcriptional_repressor_HrcA	-0.472732	9.24118	12.0553	0.000516453	0.00238657	1668.03	0.465827	-0.465827	0.116352	4.00361	6.23823e-05	0.000163197	-0.46928	0.0960489	0.0751732	0.085611	1	0	FALSE
RS00730	nucleotide_exchange_factor_GrpE	-0.451916	9.26432	11.4246	0.000724764	0.00323551	1694.38	0.445808	-0.445808	0.108378	4.11344	3.89804e-05	0.000103999	-0.448862	0.0962894	0.0763604	0.0863249	1	0	FALSE
RS00745	GntR_family_transcriptional_regulator	-0.62771	5.85477	11.6544	0.000640502	0.00289216	156.929	0.616893	-0.616893	0.170855	3.61063	0.000305455	0.000729116	-0.622301	0.060852	0.00707232	0.0339621	1	0	FALSE
RS00750	tRNA_pseudouridine(38-40)_synthase_TruA	0.11091	7.23563	0.835885	0.360576	0.554015	415.137	-0.107684	0.107684	0.111446	-0.966242	0.333923	0.428995	0.109297	0.0752041	0.018709	0.0469565	0	0	FALSE
RS00755	hydroxymethylpyrimidine/phosphomethylpyrimidine_kinase	-0.0592116	7.07638	0.243743	0.621516	0.790949	371.107	0.0624558	-0.0624558	0.104296	0.598833	0.549284	0.634903	-0.0608337	0.0735489	0.0167247	0.0451368	0	0	FALSE
RS00760	membrane_protein	-0.0848279	5.56909	0.249009	0.617774	0.788379	128.795	0.0895361	-0.0895361	0.169263	0.528976	0.596822	0.67781	-0.087182	0.0578828	0.0058044	0.0318436	0	0	FALSE
RS00765	TIGR01440_family_protein	0.118968	6.83165	0.632711	0.426363	0.620899	312.446	-0.117841	0.117841	0.141006	-0.835715	0.403315	0.502773	0.118405	0.0710053	0.014081	0.0425431	0	0	FALSE
RS00770	mechanosensitive_ion_channel_protein	-0.708321	7.67118	33.0165	9.13784e-09	9.4405e-08	560.989	0.702128	-0.702128	0.112215	6.25698	3.92499e-10	1.688e-09	-0.705225	0.0797309	0.025282	0.0525065	1	0	FALSE
RS00775	trigger_factor	0.313951	12.184	4.22665	0.0397939	0.105409	12839.8	-0.309248	0.309248	0.134944	-2.29167	0.0219248	0.0382216	0.311599	0.126636	0.578649	0.352642	0	0	FALSE
RS00780	DNA-directed_RNA_polymerase_subunit_delta	0.276095	9.64718	6.04894	0.0139147	0.0431816	2212.14	-0.277532	0.277532	0.0798177	-3.47707	0.000506923	0.00117525	0.276813	0.100269	0.0996943	0.0999815	1	0	FALSE
RS00790	alpha/beta_hydrolase	0.175964	8.59531	2.82339	0.0928999	0.206794	1067.34	-0.174029	0.174029	0.0824331	-2.11115	0.0347591	0.0576081	0.174996	0.089336	0.0481016	0.0687188	0	0	FALSE
RS01050	transcriptional_regulator	-0.888876	7.61633	48.0979	4.0547e-12	6.46891e-11	539.782	0.880074	-0.880074	0.114354	7.69603	1.4036e-14	8.11192e-14	-0.884475	0.0791609	0.0243263	0.0517436	1	0	FALSE
RS01055	zinc_ABC_transporter_ATP-binding_protein	-0.814018	8.19682	41.4948	1.18187e-10	1.5756e-09	808.736	0.806554	-0.806554	0.112924	7.14246	9.16757e-13	4.77803e-12	-0.810286	0.0851942	0.0364472	0.0608207	1	0	FALSE
RS01060	zinc_ABC_transporter_permease	-0.63818	9.20553	33.5244	7.03744e-09	7.42824e-08	1629.33	0.632918	-0.632918	0.0922861	6.85821	6.97281e-12	3.45557e-11	-0.635549	0.0956783	0.0734288	0.0845536	1	0	FALSE
RS01075	tyrosine--tRNA_ligase	0.270921	9.6406	6.03434	0.0140302	0.0434845	2202.26	-0.272132	0.272132	0.077449	-3.5137	0.000441911	0.00103523	0.271527	0.1002	0.0992489	0.0997246	1	0	FALSE
RS01080	penicillin-binding_protein_1B	0.057868	10.4583	0.304812	0.580882	0.761879	3888.37	-0.0604334	0.0604334	0.0870787	-0.694009	0.487677	0.579979	0.0591507	0.108699	0.175237	0.141968	0	0	FALSE
RS01310	23S_rRNA_(guanosine(2251)-2-O)-methyltransferase_RlmB	-0.443953	7.88701	10.493	0.00119827	0.00501789	651.092	0.440716	-0.440716	0.11821	3.72826	0.00019281	0.000474265	-0.442335	0.0819742	0.0293427	0.0556584	1	0	FALSE
RS01315	hypothetical_protein	-0.0726904	7.21502	0.268024	0.60466	0.778174	409.137	0.073848	-0.073848	0.129551	0.570031	0.568657	0.652435	-0.0732692	0.0749899	0.0184385	0.0467142	0	0	FALSE
RS01320	fatty_acid-binding_protein_DegV	0.756623	9.92891	42.6876	6.42174e-11	9.00524e-10	2695.87	-0.75441	0.75441	0.106526	-7.0819	1.42187e-12	7.24222e-12	0.755516	0.103197	0.121495	0.112346	1	0	FALSE
RS01325	transcriptional_regulator	0.619351	3.56066	6.80345	0.00909821	0.0298328	31.4655	-0.615962	0.615962	0.299384	-2.05743	0.0396447	0.0649581	0.617656	0.037008	0.00141805	0.019213	0	0	FALSE
RS01330	50S_ribosomal_protein_L13	0.689015	12.0026	40.4004	2.06898e-10	2.67863e-09	11333.9	-0.688149	0.688149	0.0738031	-9.32412	1.11907e-20	9.02865e-20	0.688582	0.12475	0.510784	0.317767	1	0	FALSE
RS01335	30S_ribosomal_protein_S9	0.561238	11.7084	26.851	2.19757e-07	1.89936e-06	9244.48	-0.561295	0.561295	0.078802	-7.12285	1.05716e-12	5.45342e-12	0.561267	0.121692	0.41662	0.269156	1	0	FALSE
RS01340	site-specific_integrase	-0.0705381	8.19785	0.326659	0.567633	0.750367	808.221	0.0686147	-0.0686147	0.0974872	0.703833	0.481537	0.57437	-0.0695764	0.085205	0.036424	0.0608145	0	0	FALSE
RS01345	transcriptional_regulator	0.161756	7.05008	1.39252	0.23798	0.415803	364.667	-0.156079	0.156079	0.120939	-1.29055	0.196858	0.271961	0.158917	0.0732755	0.0164344	0.044855	0	0	FALSE
RS01350	hypothetical_protein	0.943428	1.91653	5.54636	0.0185192	0.0553187	8.68332	-0.784255	0.784255	0.465927	-1.68322	0.0923333	0.140349	0.863842	0.0199196	0.000391331	0.0101555	0	0	FALSE
RS01360	hypothetical_protein	0.378776	1.81757	0.599646	0.438713	0.62852	6.9429	-0.164431	0.164431	0.520274	-0.316048	0.751966	0.805479	0.271604	0.018891	0.000312895	0.00960197	0	0	FALSE
RS01365	hypothetical_protein	0.498569	1.91786	1.7054	0.191584	0.362511	8.64311	-0.460544	0.460544	0.468016	-0.984036	0.325098	0.419421	0.479557	0.0199335	0.000389518	0.0101615	0	0	FALSE
RS01370	hypothetical_protein	0.515153	2.60081	2.16929	0.140791	0.284506	16.5332	-0.512958	0.512958	0.410841	-1.24855	0.211828	0.288964	0.514055	0.0270317	0.0007451	0.0138884	0	0	FALSE
RS01375	hypothetical_protein	-0.540212	5.94711	8.39109	0.00377065	0.0138371	168.343	0.53045	-0.53045	0.181038	2.93004	0.00338918	0.00683519	-0.535331	0.0618118	0.00758672	0.0346992	1	0	FALSE
RS01380	restriction_endonuclease	0.060522	9.33655	0.13402	0.7143	0.864623	1780.52	-0.058543	0.058543	0.14753	-0.396822	0.691499	0.761744	0.0595325	0.0970401	0.0802424	0.0886412	0	0	FALSE
RS01385	hypothetical_protein	0.538289	9.83442	11.1359	0.000846708	0.00369846	2514.78	-0.528809	0.528809	0.14088	-3.75362	0.000174297	0.000433485	0.533549	0.102215	0.113334	0.107774	1	0	FALSE
RS01390	ATP-dependent_DNA_helicase_RecG	0.723727	8.573	30.753	2.93055e-08	2.84632e-07	1048.93	-0.720006	0.720006	0.106366	-6.76915	1.2954e-11	6.25078e-11	0.721867	0.0891041	0.047272	0.068188	1	0	FALSE
RS01395	hypothetical_protein	0.621924	0.676121	0.845575	0.357807	0.551152	2.49964	-0.311204	0.311204	0.577372	-0.539001	0.589886	0.671066	0.466564	0.00702731	0.000112651	0.00356998	0	0	FALSE
RS01400	hypothetical_protein	-0.550304	1.59556	1.41529	0.23418	0.411527	7.01464	0.433809	-0.433809	0.501846	0.864428	0.387353	0.486461	-0.492057	0.0165835	0.000316128	0.00844984	0	0	FALSE
RS01405	MutR_family_transcriptional_regulator	-0.413556	5.29259	5.79911	0.0160343	0.0487338	105.915	0.409733	-0.409733	0.181821	2.25349	0.0242282	0.0418752	-0.411645	0.0550089	0.00477327	0.0298911	1	0	FALSE
RS01410	MFS_transporter	-0.497815	5.06996	9.52112	0.00203121	0.00802262	90.9509	0.490715	-0.490715	0.182224	2.69292	0.00708289	0.013593	-0.494265	0.052695	0.00409887	0.0283969	1	0	FALSE
RS01515	hypothetical_protein	-0.0600325	5.83886	0.123651	0.725108	0.872497	156.314	0.060577	-0.060577	0.16824	0.360063	0.7188	0.783263	-0.0603048	0.0606866	0.00704458	0.0338656	0	0	FALSE
RS01520	hypothetical_protein	0.176151	7.97706	1.50579	0.219782	0.39304	695.853	-0.176586	0.176586	0.137888	-1.28065	0.200318	0.27542	0.176369	0.0829101	0.0313599	0.057135	0	0	FALSE
RS01525	hypothetical_protein	0.214643	5.7425	1.27812	0.25825	0.443826	146.566	-0.207071	0.207071	0.185299	-1.1175	0.263783	0.34915	0.210857	0.0596851	0.00660529	0.0331452	0	0	FALSE
RS01530	hypothetical_protein	0.201353	6.07759	1.78193	0.181912	0.348224	185.586	-0.194819	0.194819	0.145539	-1.33861	0.180699	0.252578	0.198086	0.0631678	0.00836377	0.0357658	0	0	FALSE
RS01540	GNAT_family_N-acetyltransferase	-0.862966	7.58629	28.7367	8.2917e-08	7.51348e-07	527.878	0.847768	-0.847768	0.146935	5.76969	7.94159e-09	3.0983e-08	-0.855367	0.0788487	0.0237898	0.0513193	1	0	FALSE
RS01545	acetyltransferase	-0.914962	8.20139	37.5719	8.81039e-10	1.05077e-08	810.123	0.900775	-0.900775	0.135261	6.65954	2.74683e-11	1.28547e-10	-0.907868	0.0852417	0.0365098	0.0608757	1	0	FALSE
RS01550	hypothetical_protein	0.0453375	7.03032	0.0886018	0.765962	0.900721	357.974	-0.0450178	0.0450178	0.132843	-0.338879	0.734701	0.794246	0.0451777	0.0730702	0.0161328	0.0446015	0	0	FALSE
RS01555	DNA-directed_RNA_polymerase_sigma-70_factor	-0.108631	5.69342	0.351806	0.553092	0.735341	139.66	0.109821	-0.109821	0.178851	0.614036	0.539191	0.627191	-0.109226	0.0591749	0.00629403	0.0327345	0	0	FALSE
RS01560	lipoprotein	-0.257966	2.05439	0.152616	0.696047	0.855079	10.6314	0.16531	-0.16531	0.527903	0.313144	0.754172	0.807412	-0.211638	0.0213525	0.000479124	0.0109158	0	0	FALSE
RS01565	TetR_family_transcriptional_regulator	-0.292603	5.27362	2.00337	0.15695	0.309834	103.524	0.292532	-0.292532	0.206419	1.41718	0.156431	0.222354	-0.292568	0.0548117	0.00466549	0.0297386	0	0	FALSE
RS01570	antibiotic_ABC_transporter_permease	-0.245831	5.17917	2.20603	0.137472	0.278958	98.2012	0.248747	-0.248747	0.180711	1.37649	0.16867	0.237907	-0.247289	0.0538301	0.00442563	0.0291279	0	0	FALSE
RS01575	glycosyl_transferase_family_2	-0.926404	4.12238	23.3746	1.33326e-06	1.02491e-05	46.7184	0.884744	-0.884744	0.24087	3.67312	0.000239605	0.000579476	-0.905574	0.0428463	0.00210546	0.0224759	1	0	FALSE
RS01580	hypothetical_protein	0.0296322	6.24803	0.0404703	0.840564	0.949659	208.181	-0.0251137	0.0251137	0.139565	-0.179942	0.857198	0.893524	0.0273729	0.0649393	0.00938209	0.0371607	0	0	FALSE
RS01585	PadR_family_transcriptional_regulator	-0.211766	4.10623	1.13367	0.286993	0.468532	45.5665	0.199662	-0.199662	0.247288	0.807405	0.419433	0.518063	-0.205714	0.0426784	0.00205354	0.022366	0	0	FALSE
RS01590	hypothetical_protein	0.87346	9.10682	54.8749	1.28452e-13	2.29797e-12	1521.01	-0.870298	0.870298	0.0937302	-9.28514	1.61494e-20	1.27739e-19	0.871879	0.0946524	0.0685471	0.0815997	1	0	FALSE
RS01595	N-acetylglucosamine-6-phosphate_deacetylase	0.618877	8.8638	24.9199	5.97608e-07	4.90381e-06	1285.17	-0.615901	0.615901	0.106991	-5.75658	8.58363e-09	3.32946e-08	0.617389	0.0921266	0.0579188	0.0750227	1	0	FALSE
RS01600	isoprenylcysteine_carboxyl_methyltransferase	0.417517	2.57314	1.76771	0.183666	0.350066	15.4963	-0.417791	0.417791	0.395398	-1.05664	0.290678	0.379973	0.417654	0.0267442	0.00069837	0.0137213	0	0	FALSE
RS01605	glycine--tRNA_ligase_subunit_alpha	0.647542	9.43993	19.5531	9.78428e-06	6.306e-05	1914.33	-0.640799	0.640799	0.127387	-5.03034	4.89609e-07	1.62158e-06	0.64417	0.0981145	0.0862729	0.0921937	1	0	FALSE
RS01610	FMN-dependent_NADH-azoreductase	0.711578	8.46926	31.9645	1.57019e-08	1.5689e-07	976.584	-0.709185	0.709185	0.103707	-6.83834	8.0114e-12	3.94122e-11	0.710381	0.0880258	0.0440116	0.0660187	1	0	FALSE
RS01615	glycine--tRNA_ligase_subunit_beta	0.590399	10.4467	25.4442	4.55371e-07	3.78776e-06	3851.85	-0.589177	0.589177	0.088423	-6.66317	2.6799e-11	1.25706e-10	0.589788	0.108578	0.173591	0.141085	1	0	FALSE
RS01620	hypothetical_protein	0.350139	8.43204	4.48079	0.0342779	0.0930263	949.345	-0.34379	0.34379	0.14414	-2.38511	0.0170741	0.0306665	0.346964	0.087639	0.042784	0.0652115	0	0	FALSE
RS01625	membrane_protein	-0.155881	3.89805	0.605209	0.436597	0.627246	39.3958	0.159086	-0.159086	0.255298	0.62314	0.533192	0.622607	-0.157484	0.0405146	0.00177545	0.021145	0	0	FALSE
RS01630	glycerol_kinase	-0.109856	6.15003	0.303668	0.581592	0.762194	193.016	0.108231	-0.108231	0.189655	0.570673	0.568222	0.652307	-0.109044	0.0639207	0.00869866	0.0363097	0	0	FALSE
RS01635	alpha-glycerophosphate_oxidase	-0.0226604	5.88065	0.0195107	0.888912	0.977502	160.293	0.0266549	-0.0266549	0.153558	0.173581	0.862194	0.897341	-0.0246576	0.061121	0.0072239	0.0341724	0	0	FALSE
RS01640	glycerol_transporter	0.009445	5.31699	0.00266026	0.958865	1	107.176	-0.00170372	0.00170372	0.191281	-0.00890689	0.992893	0.995041	0.00557436	0.0552625	0.00483008	0.0300463	0	0	FALSE
RS01655	transketolase	0.177532	10.7479	0.80921	0.368354	0.56259	4737.28	-0.170221	0.170221	0.17794	-0.956622	0.338758	0.434101	0.173876	0.111709	0.213495	0.162602	0	0	FALSE
RS01660	bacteriocin_immunity_protein	0.048052	7.43656	0.0684368	0.793627	0.921008	474.327	-0.0475566	0.0475566	0.16513	-0.287994	0.773351	0.824445	0.0478043	0.0772924	0.0213764	0.0493344	0	0	FALSE
RS01665	3-dehydroquinate_dehydratase	0.0906226	8.8933	0.325346	0.568413	0.75099	1308.63	-0.0894768	0.0894768	0.138732	-0.644959	0.518953	0.610338	0.0900497	0.0924331	0.0589758	0.0757044	0	0	FALSE
RS01670	ABC_transporter_permease	0.154854	10.3788	0.763025	0.382384	0.578749	3668.03	-0.149381	0.149381	0.157952	-0.945736	0.344283	0.440063	0.152118	0.107873	0.165307	0.13659	0	0	FALSE
RS01675	PTS_cellobiose_transporter_subunit_IIC	0.203181	9.6021	0.792981	0.3732	0.567675	2148.56	-0.201771	0.201771	0.216554	-0.931736	0.351473	0.447834	0.202476	0.0998001	0.0968291	0.0983146	0	0	FALSE
RS01680	glutamate_5-kinase	-0.486059	8.88782	20.6596	5.48614e-06	3.73364e-05	1306.9	0.482823	-0.482823	0.0851293	5.67164	1.41434e-08	5.36225e-08	-0.484441	0.0923762	0.0588979	0.075637	1	0	FALSE
RS01685	gamma-glutamyl-phosphate_reductase	-0.28412	10.1806	7.27256	0.00700159	0.0236267	3206.14	0.280664	-0.280664	0.0854659	3.28394	0.00102368	0.00227398	-0.282392	0.105813	0.144491	0.125152	1	0	FALSE
RS01690	16S_rRNA_(cytosine(1402)-N(4))-methyltransferase	-0.109965	8.73906	1.00967	0.314982	0.501867	1178.79	0.108967	-0.108967	0.0859742	1.26743	0.205	0.28052	-0.109466	0.09083	0.0531246	0.0719773	0	0	FALSE
RS01695	cell_division_protein_FtsL	0.261256	7.18135	4.23408	0.0396201	0.105161	399.079	-0.259766	0.259766	0.110112	-2.3591	0.0183193	0.032571	0.260511	0.0746399	0.0179853	0.0463126	0	0	FALSE
RS01700	penicillin-binding_protein_2X	0.368621	9.69114	12.9812	0.000314636	0.00153717	2283.69	-0.367548	0.367548	0.075959	-4.83877	1.30648e-06	4.11103e-06	0.368084	0.100726	0.102919	0.101822	1	0	FALSE
RS01705	phospho-N-acetylmuramoyl-pentapeptide-transferase	0.526428	8.68502	24.6594	6.84095e-07	5.56656e-06	1135.74	-0.525207	0.525207	0.0824327	-6.37135	1.87371e-10	8.21583e-10	0.525818	0.0902684	0.0511843	0.0707264	1	0	FALSE
RS01710	DEAD/DEAH_box_helicase	0.288724	9.58892	7.12945	0.00758279	0.0253768	2128.16	-0.288403	0.288403	0.0914353	-3.15418	0.00160951	0.00342807	0.288564	0.0996632	0.0959095	0.0977863	1	0	FALSE
RS01715	amino_acid_ABC_transporter_substrate-binding_protein	-0.275675	9.17823	5.24048	0.0220672	0.0641835	1600.33	0.271002	-0.271002	0.111648	2.4273	0.0152118	0.0276916	-0.273338	0.0953946	0.0721218	0.0837582	0	0	FALSE
RS01720	amino_acid_ABC_transporter_permease	-0.075034	9.48619	0.517237	0.472022	0.65926	1979.16	0.0729684	-0.0729684	0.071207	1.02474	0.305488	0.397016	-0.0740012	0.0985954	0.0891945	0.093895	0	0	FALSE
RS01725	amino_acid_ABC_transporter_ATP-binding_protein	0.0477644	9.83165	0.181438	0.67014	0.835058	2515.63	-0.0498975	0.0498975	0.0903971	-0.551981	0.580961	0.663533	0.048831	0.102186	0.113372	0.107779	0	0	FALSE
RS01730	membrane_protein	-0.168539	6.25164	1.06457	0.302174	0.487796	207.628	0.16523	-0.16523	0.151348	1.09172	0.274956	0.362238	-0.166884	0.0649769	0.00935717	0.037167	0	0	FALSE
RS01735	thioredoxin-disulfide_reductase	-0.175433	10.0923	1.85257	0.173484	0.335656	3012.81	0.171814	-0.171814	0.110735	1.55159	0.120761	0.178313	-0.173624	0.104895	0.135778	0.120337	0	0	FALSE
RS01740	nicotinate_phosphoribosyltransferase	0.216043	9.25807	3.58258	0.0583883	0.144295	1689.8	-0.217294	0.217294	0.0918612	-2.36546	0.0180077	0.0320862	0.216669	0.0962244	0.076154	0.0861892	0	0	FALSE
RS01745	NAD(+)_synthetase	0.275125	9.23121	5.41721	0.0199392	0.0589097	1659.01	-0.275705	0.275705	0.102972	-2.67748	0.00741788	0.0141684	0.275415	0.0959453	0.0747666	0.0853559	0	0	FALSE
RS01750	aminopeptidase_C	-0.0528831	8.97148	0.234958	0.627871	0.796045	1386.15	0.0514894	-0.0514894	0.0952194	0.540745	0.588683	0.670454	-0.0521863	0.0932457	0.0624696	0.0778577	0	0	FALSE
RS01755	penicillin-binding_protein_1A	0.0210376	11.1149	0.0427783	0.836143	0.946423	6125.67	-0.0234911	0.0234911	0.0678484	-0.346229	0.729171	0.79157	0.0222643	0.115523	0.276065	0.195794	0	0	FALSE
RS01760	Holliday_junction_resolvase_RecU	-0.06648	8.80444	0.278079	0.597963	0.774059	1232.8	0.0655976	-0.0655976	0.104513	0.627648	0.530235	0.62035	-0.0660388	0.0915096	0.0555585	0.073534	0	0	FALSE
RS01765	hypothetical_protein	0.439803	4.36598	5.32768	0.0209893	0.0615263	55.874	-0.421952	0.421952	0.228926	-1.84318	0.065303	0.102743	0.430878	0.0453781	0.00251807	0.0239481	0	0	FALSE
RS01770	cell_cycle_protein_GpsB	-0.246887	9.49782	4.70525	0.0300706	0.0831855	1994.46	0.242613	-0.242613	0.0889119	2.72869	0.00635857	0.012332	-0.24475	0.0987163	0.0898841	0.0943002	0	0	FALSE
RS01775	RNA_methyltransferase	0.676816	8.54883	38.5051	5.46113e-10	6.71058e-09	1033.93	-0.67234	0.67234	0.0879774	-7.64219	2.13563e-14	1.22374e-13	0.674578	0.0888529	0.046596	0.0677244	1	0	FALSE
RS01780	hypothetical_protein	0.297118	10.4185	8.49854	0.00355432	0.0131623	3779.23	-0.2987	0.2987	0.0631048	-4.7334	2.20792e-06	6.76647e-06	0.297909	0.108286	0.170318	0.139302	1	0	FALSE
RS01785	S-ribosylhomocysteine_lyase	-0.350842	9.53641	9.46148	0.00209831	0.00825415	2048.9	0.345869	-0.345869	0.0911292	3.79537	0.000147425	0.000370308	-0.348355	0.0991173	0.0923376	0.0957275	1	0	FALSE
RS01790	ribonuclease_Y	0.773876	10.2255	51.637	6.67705e-13	1.12424e-11	3306.74	-0.772476	0.772476	0.0796099	-9.70326	2.92003e-22	2.60606e-21	0.773176	0.10628	0.149024	0.127652	1	0	FALSE
RS01810	DNA-binding_response_regulator	-0.976238	7.1217	59.2473	1.39053e-14	2.73941e-13	382.988	0.974303	-0.974303	0.112516	8.65925	4.74893e-18	3.3259e-17	-0.975271	0.0740199	0.0172601	0.04564	1	0	FALSE
RS01820	guanylate_kinase	0.855764	8.12299	47.4949	5.51486e-12	8.71277e-11	767.551	-0.853011	0.853011	0.0995167	-8.57154	1.02113e-17	6.95816e-17	0.854387	0.0844269	0.0345912	0.059509	1	0	FALSE
RS02840	TlyA_family_rRNA_(cytidine-2-O)-methyltransferase	-0.239369	8.06619	4.00246	0.0454338	0.117346	737.942	0.235282	-0.235282	0.101486	2.31836	0.0204295	0.0358005	-0.237326	0.0838365	0.0332568	0.0585467	0	0	FALSE
RS02845	ArgR_family_transcriptional_regulator	-0.238326	7.70109	3.9134	0.0479027	0.122295	572.378	0.234372	-0.234372	0.1012	2.31592	0.0205625	0.0360022	-0.236349	0.0800418	0.0257953	0.0529186	0	0	FALSE
RS02850	DNA_repair_protein_RecN	-0.127682	9.36614	1.60456	0.205259	0.375484	1821.57	0.127301	-0.127301	0.0701164	1.81557	0.0694367	0.108629	-0.127492	0.0973477	0.0820926	0.0897201	0	0	FALSE
RS02855	hypothetical_protein	0.0321631	9.20459	0.0987803	0.753298	0.894721	1628.74	-0.03306	0.03306	0.0782008	-0.422758	0.672472	0.744852	0.0326116	0.0956685	0.0734025	0.0845355	0	0	FALSE
RS02860	lipase	0.175013	7.95987	2.30764	0.128739	0.266108	686.333	-0.171597	0.171597	0.0945274	-1.81532	0.069475	0.108629	0.173305	0.0827315	0.0309309	0.0568312	0	0	FALSE
RS02865	membrane_protein	0.479905	7.22236	13.5412	0.000233379	0.00116901	411.092	-0.47256	0.47256	0.113348	-4.1691	3.05805e-05	8.25714e-05	0.476232	0.0750661	0.0185266	0.0467964	1	0	FALSE
RS02870	transcriptional_regulator	-0.929455	12.785	23.8231	1.05606e-06	8.31522e-06	19474.1	0.908715	-0.908715	0.1738	5.22852	1.70868e-07	5.88124e-07	-0.919085	0.132881	0.877638	0.50526	1	0	FALSE
RS02885	peptidoglycan_branched_peptide_synthesis_protein	-0.711127	10.166	42.0024	9.11624e-11	1.24257e-09	3170.52	0.707087	-0.707087	0.077434	9.13148	6.75718e-20	5.14311e-19	-0.709107	0.105662	0.142886	0.124274	1	0	FALSE
RS02890	UDP-N-acetylmuramoylpentapeptide-lysine_N(6)-alanyltransferase	-0.567734	9.55859	24.2068	8.6528e-07	6.90238e-06	2080.95	0.564534	-0.564534	0.0919888	6.13699	8.41015e-10	3.49758e-09	-0.566134	0.0993479	0.093782	0.0965649	1	0	FALSE
RS02895	UDP-N-acetylmuramoylpentapeptide-lysine_N(6)-alanyltransferase	-0.678763	9.73092	33.8922	5.82511e-09	6.24339e-08	2344.09	0.6744	-0.6744	0.0884805	7.62202	2.49738e-14	1.41894e-13	-0.676581	0.101139	0.105641	0.10339	1	0	FALSE
RS02900	sugar-phosphatase	-0.521213	9.12691	20.0119	7.69618e-06	5.06076e-05	1541.43	0.516582	-0.516582	0.0881317	5.86147	4.58777e-09	1.82156e-08	-0.518897	0.0948612	0.0694673	0.0821642	1	0	FALSE
RS02905	phosphohydrolase	-0.677654	7.97291	24.911	6.00399e-07	4.91842e-06	691.047	0.672403	-0.672403	0.115772	5.808	6.32222e-09	2.48575e-08	-0.675029	0.082867	0.0311434	0.0570052	1	0	FALSE
RS02910	hypothetical_protein	-0.484708	6.55555	9.79558	0.00174932	0.00702701	258.434	0.478166	-0.478166	0.149903	3.18984	0.00142351	0.00305449	-0.481437	0.0681356	0.0116468	0.0398912	1	0	FALSE
RS02915	calcium-translocating_P-type_ATPase2C_PMCA-type	-0.76663	10.8409	37.0512	1.15066e-09	1.34918e-08	5068.36	0.753741	-0.753741	0.118623	6.35409	2.09658e-10	9.15325e-10	-0.760186	0.112676	0.228415	0.170546	1	0	FALSE
RS02920	phosphoesterase	-0.459324	7.16926	8.66084	0.00325122	0.0122734	395.481	0.456134	-0.456134	0.139858	3.26141	0.0011086	0.00245165	-0.457729	0.0745142	0.0178231	0.0461687	1	0	FALSE
RS02925	fructose-bisphosphatase_class_III	0.259627	6.93531	2.47635	0.115571	0.246363	338.454	-0.257874	0.257874	0.162815	-1.58385	0.113229	0.168176	0.258751	0.0720827	0.0152531	0.0436679	0	0	FALSE
RS02930	epoxyqueuosine_reductase	0.232743	7.5762	2.69051	0.100948	0.221666	525.603	-0.231215	0.231215	0.129905	-1.77987	0.0750971	0.116426	0.231979	0.0787437	0.0236873	0.0512155	0	0	FALSE
RS02935	peptide_chain_release_factor_2	-0.0913051	8.97384	0.763471	0.382244	0.578719	1387.01	0.0892491	-0.0892491	0.0763513	1.16893	0.242433	0.323833	-0.0902771	0.0932702	0.0625085	0.0778893	0	0	FALSE
RS02940	cell_division_ATP-binding_protein_FtsE	0.0210419	8.54491	0.0310177	0.860201	0.960272	1029.51	-0.0236878	0.0236878	0.0993337	-0.238467	0.811519	0.85519	0.0223649	0.0888122	0.0463968	0.0676045	0	0	FALSE
RS02945	ABC_transporter_permease	0.0973774	9.75258	0.812903	0.367263	0.561453	2381.71	-0.0997526	0.0997526	0.0840911	-1.18624	0.235526	0.316282	0.098565	0.101364	0.107336	0.10435	0	0	FALSE
RS02955	IS3_family_transposase	-0.174831	6.6416	1.84936	0.173858	0.336112	273.946	0.177036	-0.177036	0.116176	1.52386	0.127542	0.18655	-0.175934	0.06903	0.0123459	0.0406879	0	0	FALSE
RS02960	thioesterase	-0.271172	8.83482	6.01619	0.0141752	0.0439021	1258.89	0.267516	-0.267516	0.081482	3.28313	0.00102662	0.00227799	-0.269344	0.0918254	0.0567344	0.0742799	1	0	FALSE
RS02965	hypothetical_protein	-0.459599	8.31494	8.31326	0.00393567	0.0143346	875.374	0.452919	-0.452919	0.137176	3.30175	0.00096085	0.00214147	-0.456259	0.0864219	0.0394504	0.0629362	1	0	FALSE
RS02975	bifunctional_DnaQ_family_exonuclease/ATP-dependent_helicase	0.893307	8.05446	57.6526	3.12744e-14	6.01507e-13	732.404	-0.890149	0.890149	0.0953904	-9.33164	1.04243e-20	8.44408e-20	0.891728	0.0837147	0.0330072	0.0583609	1	0	FALSE
RS02980	aspartate_aminotransferase	0.683464	9.11693	36.3902	1.61516e-09	1.86241e-08	1532.01	-0.681729	0.681729	0.0876274	-7.77987	7.26009e-15	4.25686e-14	0.682597	0.0947575	0.069043	0.0819003	1	0	FALSE
RS03000	hypothetical_protein	-0.886451	6.1997	19.1654	1.19866e-05	7.60454e-05	199.619	0.863274	-0.863274	0.191384	4.51069	6.46156e-06	1.8861e-05	-0.874862	0.064437	0.00899623	0.0367166	1	0	FALSE
RS03005	RNase_adaptor_protein_RapZ	-0.758981	7.66985	39.5457	3.20476e-10	4.01916e-09	559.837	0.751278	-0.751278	0.0993677	7.56059	4.01259e-14	2.26073e-13	-0.75513	0.0797172	0.0252301	0.0524737	1	0	FALSE
RS03010	YvcK_family_protein	-0.337568	8.00328	9.09095	0.00256878	0.00994405	706.573	0.33433	-0.33433	0.0895392	3.7339	0.000188541	0.000464331	-0.335949	0.0831827	0.0318431	0.0575129	1	0	FALSE
RS03015	sporulation_protein	-0.193948	8.12983	2.97369	0.0846284	0.192791	771.785	0.192404	-0.192404	0.0906365	2.12281	0.0337696	0.0560141	-0.193176	0.084498	0.034782	0.05964	0	0	FALSE
RS03020	dipeptidase	-0.12898	9.17966	1.35403	0.244576	0.424644	1599.95	0.128934	-0.128934	0.0840745	1.53357	0.125134	0.183694	-0.128957	0.0954094	0.072105	0.0837572	0	0	FALSE
RS03030	50S_ribosomal_protein_L31_type_B	0.712394	13.0696	45.2169	1.76375e-11	2.62458e-10	23776.4	-0.71278	0.71278	0.0887502	-8.03131	9.64403e-16	5.87674e-15	0.712587	0.13584	1.07153	0.603684	1	0	FALSE
RS03035	oligoribonuclease	-0.489195	8.81315	12.4403	0.00042016	0.00200245	1239.53	0.482427	-0.482427	0.120924	3.98951	6.6209e-05	0.00017276	-0.485811	0.0916001	0.0558619	0.073731	1	0	FALSE
RS03040	adenosine_deaminase	0.104568	4.815	0.378258	0.538537	0.720517	75.3559	-0.0891845	0.0891845	0.196719	-0.45336	0.650289	0.726667	0.0968763	0.0500451	0.00339606	0.0267206	0	0	FALSE
RS03045	flavodoxin	0.621004	8.49612	15.2102	9.61813e-05	0.000522342	993.026	-0.611757	0.611757	0.13954	-4.38409	1.1647e-05	3.32277e-05	0.61638	0.0883051	0.0447526	0.0665288	1	0	FALSE
RS03050	chorismate_mutase	0.0238464	5.65574	0.0189153	0.89061	0.978705	136.57	-0.0184726	0.0184726	0.167001	-0.110614	0.911923	0.938443	0.0211595	0.0587833	0.00615479	0.0324691	0	0	FALSE
RS03055	voltage-gated_chloride_channel_protein	0.123956	8.19039	1.10612	0.292927	0.475921	804.435	-0.12506	0.12506	0.0946752	-1.32094	0.186521	0.2591	0.124508	0.0851274	0.0362534	0.0606904	0	0	FALSE
RS03060	50S_ribosomal_protein_L19	0.304687	11.4253	7.57876	0.005906	0.0205276	7596.39	-0.305726	0.305726	0.08507	-3.59381	0.000325876	0.000775109	0.305206	0.11875	0.342346	0.230548	1	0	FALSE
RS03070	hypothetical_protein	-0.483481	0.742925	0.575166	0.448213	0.639216	2.87965	0.29003	-0.29003	0.574324	0.504994	0.613563	0.694049	-0.386756	0.00772164	0.000129777	0.00392571	0	0	FALSE
RS03075	transposase	0.78273	6.20083	16.6488	4.49784e-05	0.000259319	200.627	-0.76234	0.76234	0.178524	-4.27022	1.95276e-05	5.39919e-05	0.772535	0.0644487	0.00904164	0.0367452	1	0	FALSE
RS03105	DNA-binding_response_regulator	0.581233	5.3323	9.85733	0.00169156	0.00682043	111.257	-0.574743	0.574743	0.197719	-2.90687	0.00365062	0.00732667	0.577988	0.0554217	0.00501399	0.0302178	1	0	FALSE
RS03110	two-component_sensor_histidine_kinase	0.627695	6.71819	18.6435	1.57583e-05	9.72422e-05	290.725	-0.617596	0.617596	0.13832	-4.46498	8.00776e-06	2.31731e-05	0.622645	0.069826	0.0131021	0.041464	1	0	FALSE
RS03125	rod_shape-determining_protein_RodA	-0.567478	9.22621	27.8313	1.32367e-07	1.16684e-06	1652.47	0.563942	-0.563942	0.0853728	6.60564	3.95804e-11	1.82269e-10	-0.56571	0.0958933	0.0744716	0.0851825	1	0	FALSE
RS03130	hydrolase	0.22238	8.14903	3.29652	0.0694269	0.165199	783.206	-0.220694	0.220694	0.108944	-2.02575	0.0427905	0.0696035	0.221537	0.0846975	0.0352967	0.0599971	0	0	FALSE
RS03135	DNA_gyrase_subunit_B	0.131023	10.0175	1.66657	0.196718	0.367995	2861.78	-0.133132	0.133132	0.0657119	-2.02599	0.0427656	0.0696035	0.132077	0.104118	0.128972	0.116545	0	0	FALSE
RS03140	septation_ring_formation_regulator_EzrA	0.336932	10.7515	10.4269	0.00124191	0.0051695	4761.39	-0.337992	0.337992	0.0733805	-4.60603	4.10434e-06	1.21742e-05	0.337462	0.111746	0.214581	0.163164	1	0	FALSE
RS03145	phosphoserine_phosphatase_SerB	0.0959211	6.10123	0.307159	0.579429	0.760634	186.653	-0.0922516	0.0922516	0.164025	-0.562424	0.573827	0.656873	0.0940864	0.0634135	0.00841187	0.0359127	0	0	FALSE
RS03160	enolase	-0.0267951	13.982	0.051011	0.821313	0.934419	44699.3	0.0238717	-0.0238717	0.0982475	0.242975	0.808025	0.852398	-0.0253334	0.145323	2.01446	1.07989	0	0	FALSE
RS03170	3-phosphoshikimate_1-carboxyvinyltransferase	-0.63097	8.24737	31.4446	2.05209e-08	2.03785e-07	836.805	0.627231	-0.627231	0.0875643	7.16309	7.88794e-13	4.14322e-12	-0.6291	0.0857197	0.0377122	0.0617159	1	0	FALSE
RS03175	shikimate_kinase	-0.268009	7.082	4.05523	0.0440348	0.114801	372.191	0.265979	-0.265979	0.116117	2.29062	0.0219852	0.0382938	-0.266994	0.0736072	0.0167735	0.0451904	0	0	FALSE
RS03180	LytR_family_transcriptional_regulator	-0.243869	9.1473	4.71345	0.0299275	0.082984	1565.72	0.239805	-0.239805	0.0998733	2.40109	0.0163462	0.0294904	-0.241837	0.0950732	0.070562	0.0828176	0	0	FALSE
RS03185	RNA_methyltransferase	0.440149	7.1438	12.6486	0.000375849	0.00180541	389.126	-0.433561	0.433561	0.106575	-4.06814	4.73902e-05	0.000125441	0.436855	0.0742496	0.0175367	0.0458932	1	0	FALSE
RS03190	hypothetical_protein	0.766987	5.77351	23.4911	1.25495e-06	9.69297e-06	149.251	-0.749845	0.749845	0.154893	-4.84106	1.29147e-06	4.07013e-06	0.758416	0.0600074	0.00672629	0.0333668	1	0	FALSE
RS03195	acid_phosphatase/phosphotransferase	0.448083	7.91788	15.9283	6.57863e-05	0.00036795	666.944	-0.443898	0.443898	0.0927326	-4.78686	1.69413e-06	5.26512e-06	0.44599	0.0822951	0.0300571	0.0561761	1	0	FALSE
RS03200	ClbS/DfsB_family_four-helix_bundle_protein	0.604698	7.75128	25.2284	5.0927e-07	4.20731e-06	594.225	-0.597778	0.597778	0.104916	-5.69769	1.21443e-08	4.648e-08	0.601238	0.0805635	0.0267799	0.0536717	1	0	FALSE
RS03215	cell_wall_surface_anchor_protein	0.904033	1.47328	3.73555	0.0532661	0.133605	5.26417	-0.556254	0.556254	0.528875	-1.05177	0.292906	0.382637	0.730143	0.0153127	0.00023724	0.00777495	0	0	FALSE
RS03220	IS3_family_transposase	0.96791	7.23861	34.1526	5.09553e-09	5.48559e-08	414.565	-0.95128	0.95128	0.145988	-6.51614	7.21394e-11	3.23345e-10	0.959595	0.075235	0.0186832	0.0469591	1	0	FALSE
RS03230	molecular_chaperone_Hsp33	0.957586	5.19282	28.5928	8.93155e-08	8.07824e-07	98.2226	-0.924704	0.924704	0.189638	-4.87615	1.08174e-06	3.43063e-06	0.941145	0.0539719	0.00442659	0.0291993	1	0	FALSE
RS03235	YSIRK-targeted_surface_antigen_transcriptional_regulator	0.509708	8.23761	10.2966	0.00133277	0.00550533	830.905	-0.500714	0.500714	0.142368	-3.51705	0.000436367	0.00102343	0.505211	0.0856181	0.0374463	0.0615322	1	0	FALSE
RS03240	cell_wall_surface_anchor_protein	0.614253	7.10002	11.312	0.000770058	0.00341266	375.46	-0.603006	0.603006	0.165313	-3.64767	0.00026463	0.000636184	0.60863	0.0737945	0.0169208	0.0453577	1	0	FALSE
RS03245	hypothetical_protein	0.176676	3.79048	0.748303	0.387014	0.58376	35.7019	-0.145268	0.145268	0.269019	-0.539993	0.589202	0.670666	0.160972	0.0393966	0.00160897	0.0205028	0	0	FALSE
RS03250	class_C_sortase	0.298006	4.12981	2.21756	0.136449	0.277395	45.6619	-0.261866	0.261866	0.244786	-1.06978	0.28472	0.37291	0.279936	0.0429235	0.00205784	0.0224907	0	0	FALSE
RS03255	class_C_sortase	0.610127	3.70253	8.18115	0.00423278	0.015223	34.1541	-0.571296	0.571296	0.273467	-2.08909	0.0367	0.0606256	0.590712	0.0384825	0.00153922	0.0200109	0	0	FALSE
RS03260	cell_wall_surface_anchor_protein	0.0682398	6.44639	0.221009	0.638272	0.805663	238.486	-0.0671769	0.0671769	0.134677	-0.498799	0.617921	0.697843	0.0677083	0.0670011	0.0107478	0.0388744	0	0	FALSE
RS03265	class_C_sortase	-0.130948	4.65904	0.557885	0.455114	0.645842	67.8759	0.134373	-0.134373	0.206401	0.651027	0.515029	0.606178	-0.13266	0.0484241	0.00305896	0.0257415	0	0	FALSE
RS03270	hypothetical_protein	-0.783722	0.397885	0.982129	0.321674	0.509195	2.38072	0.281166	-0.281166	0.579941	0.484818	0.627805	0.706237	-0.532444	0.00413544	0.000107292	0.00212137	0	0	FALSE
RS03275	hypothetical_protein	-0.295438	-0.218417	0.0588824	0.808271	0.925205	0.493535	0.0375295	-0.0375295	0.406635	0.0922927	0.926465	0.949051	-0.166484	-0.00227013	2.22421e-05	-0.00112394	0	0	FALSE
RS03285	hypothetical_protein	-0.648227	0.701281	0.971998	0.324182	0.510694	2.70851	0.494221	-0.494221	0.577658	0.85556	0.392241	0.490788	-0.571224	0.00728882	0.000122064	0.00370544	0	0	FALSE
RS03290	serine_hydrolase	-0.602455	9.56253	29.0978	6.88157e-08	6.34199e-07	2088.57	0.59668	-0.59668	0.0984691	6.05956	1.36491e-09	5.6053e-09	-0.599568	0.0993888	0.0941254	0.0967571	1	0	FALSE
RS03305	multidrug_ABC_transporter_permease	0.503093	5.0753	9.12659	0.00251921	0.0097677	90.7522	-0.48106	0.48106	0.182002	-2.64316	0.00821367	0.0155558	0.492076	0.0527505	0.00408992	0.0284202	1	0	FALSE
RS03310	hypothetical_protein	-0.585238	2.74205	4.52569	0.0333896	0.0909199	17.1593	0.509268	-0.509268	0.358576	1.42025	0.155535	0.221237	-0.547253	0.0284997	0.000773315	0.0146365	0	0	FALSE
RS03315	hypothetical_protein	-0.25694	3.8025	1.59124	0.207149	0.376415	36.8855	0.251715	-0.251715	0.262465	0.959043	0.337537	0.432812	-0.254328	0.0395215	0.00166232	0.0205919	0	0	FALSE
RS03320	SDR_family_oxidoreductase	-0.53086	3.86687	5.40109	0.0201242	0.059312	38.1176	0.518003	-0.518003	0.273135	1.89651	0.057893	0.0920901	-0.524432	0.0401906	0.00171784	0.0209542	0	0	FALSE
RS03325	acyl_carrier_protein	0.027513	3.0269	0.0121101	0.912373	0.99633	21.0328	-0.0147503	0.0147503	0.332725	-0.0443318	0.96464	0.976746	0.0211317	0.0314603	0.000947882	0.0162041	0	0	FALSE
RS03330	beta-hydroxyacyl-ACP_dehydratase	-0.17752	3.84452	0.580727	0.446027	0.636659	37.937	0.168456	-0.168456	0.27741	0.607245	0.543688	0.630241	-0.172988	0.0399583	0.0017097	0.020834	0	0	FALSE
RS03335	ABC_transporter_ATP-binding_protein	0.0352743	4.59127	0.0292626	0.864174	0.960281	63.8597	-0.0241022	0.0241022	0.227628	-0.105884	0.915675	0.940541	0.0296882	0.0477197	0.00287796	0.0252988	0	0	FALSE
RS03340	ABC_transporter_permease	0.284146	4.86873	2.4832	0.115068	0.245903	78.4281	-0.263851	0.263851	0.202036	-1.30596	0.191567	0.265196	0.273998	0.0506035	0.00353451	0.027069	0	0	FALSE
RS03345	hypothetical_protein	0.131118	6.39916	0.706507	0.400606	0.598965	232.29	-0.127191	0.127191	0.149251	-0.852195	0.394106	0.492815	0.129155	0.0665101	0.0104686	0.0384894	0	0	FALSE
RS03350	hypothetical_protein	0.0708775	5.26872	0.208567	0.647893	0.815692	104.802	-0.0653619	0.0653619	0.168906	-0.386973	0.698777	0.766412	0.0681197	0.0547608	0.0047231	0.029742	0	0	FALSE
RS03355	hypothetical_protein	0.155879	6.66421	1.11847	0.290249	0.472991	279.14	-0.151328	0.151328	0.136574	-1.10803	0.267847	0.354261	0.153603	0.0692649	0.01258	0.0409225	0	0	FALSE
RS03360	hypothetical_protein	0.0125942	6.40021	0.00700477	0.933299	1	231.872	-0.00924363	0.00924363	0.139231	-0.0663907	0.947067	0.964278	0.0109189	0.0665211	0.0104498	0.0384854	0	0	FALSE
RS03365	hypothetical_protein	0.077097	6.11327	0.231661	0.630295	0.797663	190.596	-0.0748323	0.0748323	0.156861	-0.477063	0.633317	0.711644	0.0759646	0.0635387	0.00858958	0.0360641	0	0	FALSE
RS03395	peptidase_M13	-1.16544	1.96714	5.81479	0.0158919	0.0483615	9.37	0.912484	-0.912484	0.489266	1.86501	0.0621807	0.0980598	-1.03896	0.0204456	0.000422277	0.010434	0	1	FALSE
RS03400	peptidase_M13	-0.451218	1.84999	1.35382	0.244611	0.424644	8.40504	0.377851	-0.377851	0.461784	0.818242	0.413219	0.511641	-0.414534	0.019228	0.000378789	0.00980339	0	0	FALSE
RS03405	alpha/beta_hydrolase	-0.383358	2.3266	1.41609	0.234048	0.411444	12.6244	0.296427	-0.296427	0.40453	0.732767	0.4637	0.559046	-0.339892	0.0241817	0.000568945	0.0123753	0	0	FALSE
RS03420	alpha/beta_hydrolase	0.0273482	2.66578	0.00850695	0.926513	1	16.7221	-0.124844	0.124844	0.382837	-0.326102	0.744347	0.799464	0.0760961	0.027707	0.000753613	0.0142303	0	0	FALSE
RS03425	ABC_transporter_permease	-0.603439	2.76644	4.60214	0.0319321	0.0873422	16.621	0.568784	-0.568784	0.369489	1.53938	0.123711	0.18187	-0.586112	0.0287532	0.000749059	0.0147511	0	0	FALSE
RS03440	hypothetical_protein	-0.827612	1.68266	3.85736	0.0495281	0.125827	6.5285	0.722941	-0.722941	0.507005	1.42591	0.153896	0.219524	-0.775276	0.0174889	0.000294219	0.00889154	0	0	FALSE
RS03450	hypothetical_protein	-0.915425	7.93057	59.189	1.43236e-14	2.81042e-13	672.196	0.913814	-0.913814	0.101888	8.96879	2.99779e-19	2.23946e-18	-0.91462	0.082427	0.0302938	0.0563604	1	0	FALSE
RS03455	DNA-entry_nuclease	0.115571	4.92847	0.173127	0.677348	0.839311	84.7177	-0.127481	0.127481	0.282772	-0.450827	0.652115	0.72769	0.121526	0.0512244	0.00381797	0.0275212	0	0	FALSE
RS03460	cytochrome_o_ubiquinol_oxidase	-0.174796	8.57644	2.18022	0.139795	0.282845	1051.64	0.172136	-0.172136	0.090233	1.90768	0.0564324	0.0901221	-0.173466	0.0891398	0.0473943	0.0682671	0	0	FALSE
RS03465	ABC_transporter_ATP-binding_protein	-0.336132	8.52126	3.03221	0.0816268	0.18674	1010.96	0.328799	-0.328799	0.179439	1.83237	0.0668959	0.105167	-0.332466	0.0885663	0.045561	0.0670636	0	0	FALSE
RS03470	iron_export_ABC_transporter_permease_subunit_FetB	-0.454871	9.86766	5.83977	0.0156678	0.0477623	2576.62	0.443901	-0.443901	0.176671	2.51259	0.0119848	0.0221978	-0.449386	0.10256	0.11612	0.10934	1	0	FALSE
RS03475	phosphate_ABC_transporter_ATPase	-0.495962	5.66486	10.9345	0.000943895	0.00406459	138.215	0.492938	-0.492938	0.15224	3.2379	0.00120413	0.00261716	-0.49445	0.0588781	0.00622892	0.0325535	1	0	FALSE
RS03480	LysR_family_transcriptional_regulator	0.0380994	7.67762	0.0567713	0.811674	0.928227	561.926	-0.0393635	0.0393635	0.140881	-0.279409	0.779931	0.829268	0.0387315	0.0797979	0.0253243	0.0525611	0	0	FALSE
RS03485	membrane_protein	0.578946	5.06527	10.496	0.00119633	0.00501408	89.7188	-0.552549	0.552549	0.193197	-2.86002	0.00423611	0.00845128	0.565747	0.0526462	0.00404335	0.0283448	1	0	FALSE
[truncated: 889 more rows]
