# Supplementary material for: Cas9 Contributes to Group B Streptococcal Colonization and Disease
Source: Front Microbiol. 2019 Aug 21;10:1930. doi: 10.3389/fmicb.2019.01930 (PMC6712506; doi:10.3389/fmicb.2019.01930)
Supplement: Supplementary file 7 [file Table_4.XLSX]

## Sheet: deseq2
id	function	baseMean	log2FoldChange	lfcSE	stat	pvalue	padj
RS00005	chromosomal_replication_initiator_protein_DnaA	1745.53	-0.0884946	0.0707802	-1.25027	0.2112	0.294756
RS00010	DNA_polymerase_III_subunit_beta	2894.12	-0.347521	0.0740928	-4.69034	2.7275e-06	8.9962e-06
RS00015	diacylglycerol_kinase	257.048	0.291387	0.126495	2.30355	0.021248	0.0381578
RS00020	hypothetical_protein	104.954	0.0661865	0.177367	0.373161	0.709028	0.773948
RS00025	GTP-binding_protein_YchF	3729.2	-0.00874293	0.0643433	-0.135879	0.891917	0.91659
RS00030	aminoacyl-tRNA_hydrolase	155.349	0.169648	0.147445	1.15059	0.249902	0.339202
RS00035	transcription-repair_coupling_factor	1912.06	0.291497	0.0701501	4.15534	3.24809e-05	9.27556e-05
RS00040	hypothetical_protein	735.913	0.874699	0.0853689	10.2461	1.23205e-24	1.74158e-23
RS00045	septum_formation_initiation_protein	575.518	0.664289	0.0908949	7.30831	2.70515e-13	1.80252e-12
RS00050	hypothetical_protein	141.19	0.492089	0.151065	3.25746	0.00112415	0.00257191
RS00055	serine_hydrolase	1543.89	0.2709	0.068053	3.98072	6.87074e-05	0.000187806
RS00060	tRNA(Ile)-lysidine_synthetase	1195.05	0.162492	0.0743584	2.18526	0.02887	0.0504714
RS00065	hypoxanthine-guanine_phosphoribosyltransferase	2366.19	0.130853	0.0655396	1.99655	0.0458737	0.0768055
RS00070	cell_division_protein_FtsH	8910.31	-0.134975	0.0564131	-2.39262	0.0167287	0.0307678
RS00245	CHAP_domain-containing_protein	11735	-0.966317	0.0748615	-12.9081	4.05425e-38	1.13005e-36
RS00250	ribose-phosphate_pyrophosphokinase_1	8154.2	-0.180851	0.061647	-2.93366	0.00334996	0.00708287
RS00255	aminotransferase_A	3908.34	1.75551	0.0726473	24.1649	5.20661e-129	1.47198e-126
RS00260	DNA_repair_protein_RecO	4775.82	1.68553	0.0796571	21.1598	2.24018e-99	3.69442e-97
RS00265	CPBP_family_intramembrane_metalloprotease	17.5217	0.340203	0.330411	1.02964	0.303181	0.398668
RS00270	phosphate_acyltransferase	2074.38	0.224226	0.0699737	3.20443	0.00135329	0.00305726
RS00275	acyl_carrier_protein	3174.6	0.0271153	0.0682508	0.397288	0.691155	0.760309
RS00280	phosphoribosylaminoimidazolesuccinocarboxamide_synthase	18.9035	1.06274	0.330436	3.21618	0.00129911	0.00294833
RS00285	phosphoribosylformylglycinamidine_synthase	73.1394	0.330076	0.194602	1.69616	0.0898551	0.141018
RS00290	amidophosphoribosyltransferase	45.5374	0.185435	0.245947	0.753963	0.450871	0.553864
RS00295	phosphoribosylformylglycinamidine_cyclo-ligase	37.4088	0.34048	0.261924	1.29992	0.193628	0.272928
RS00300	phosphoribosylglycinamide_formyltransferase	19.6505	0.0954876	0.316999	0.301224	0.763244	0.815143
RS00305	GNAT_family_acetyltransferase	119.064	0.276176	0.172928	1.59706	0.110252	0.168389
RS00310	bifunctional_phosphoribosylaminoimidazolecarboxamide_formyltransferase/inosine_monophosphate_cyclohydrolase	475.83	0.235504	0.0992755	2.37223	0.0176813	0.0322798
RS00315	hypothetical_protein	50.6541	2.59504	0.262442	9.88804	4.69129e-23	5.91341e-22
RS00320	peptidoglycan-binding_protein_LysM	2645.32	0.177767	0.0822718	2.16073	0.0307161	0.0532754
RS00325	N-acetylmannosamine-6-phosphate_2-epimerase	15.827	0.321542	0.335481	0.958449	0.337836	0.437265
RS00330	sugar_ABC_transporter_substrate-binding_protein	23.0492	0.73006	0.307406	2.3749	0.0175536	0.0321059
RS00335	sugar_ABC_transporter_permease	5.29998	0.219452	0.389287	0.56373	0.572938	0.66606
RS00340	sugar_ABC_transporter_permease	7.46445	0.215967	0.384922	0.561067	0.574752	0.666764
RS00345	hypothetical_protein	5.425	0.209597	0.389409	0.538244	0.590409	0.681294
RS00350	hypothetical_protein	14.5059	0.152975	0.350394	0.436581	0.662416	0.739797
RS00355	N-acetylneuraminate_lyase	16.5029	-0.0928598	0.342389	-0.271211	0.786228	0.834735
RS00360	sugar_kinase	16.24	0.597153	0.337126	1.7713	0.0765104	0.122305
RS00365	acetylxylan_esterase	36.7483	0.288785	0.258527	1.11704	0.263976	0.356593
RS00370	MurR/RpiR_family_transcriptional_regulator	548.485	-0.625469	0.0965059	-6.48115	9.10258e-11	4.80373e-10
RS00375	phosphoribosylamine--glycine_ligase	23.3036	0.581345	0.298221	1.94938	0.0512499	0.0845902
RS00380	5-(carboxyamino)imidazole_ribonucleotide_mutase	8.43129	0.147742	0.385327	0.38342	0.701409	0.768588
RS00385	5-(carboxyamino)imidazole_ribonucleotide_synthase	36.4055	-0.173723	0.269124	-0.645512	0.518596	0.614551
RS00390	hypothetical_protein	454.874	0.0744969	0.103822	0.717541	0.47304	0.573268
RS00395	hypothetical_protein	310.742	-0.22733	0.116534	-1.95075	0.0510867	0.0843912
RS00400	adenylosuccinate_lyase	926.328	-0.147331	0.0790974	-1.86265	0.0625115	0.101568
RS00405	transcriptional_regulator	118.209	0.1584	0.167144	0.94769	0.343287	0.442024
RS00410	Holliday_junction_branch_migration_DNA_helicase_RuvB	1236.25	-0.0262407	0.0935034	-0.280639	0.778987	0.828825
RS00415	hypothetical_protein	923.292	0.55953	0.0843668	6.63211	3.30926e-11	1.80912e-10
RS00420	membrane_protein	832.664	0.316568	0.0886506	3.57096	0.000355674	0.000874385
RS00425	acyltransferase	6992.63	0.0860287	0.0609023	1.41257	0.157783	0.229935
RS00430	bifunctional_acetaldehyde-CoA/alcohol_dehydrogenase	2786.17	0.680367	0.092909	7.32294	2.42595e-13	1.63298e-12
RS00435	zinc-dependent_alcohol_dehydrogenase	304.754	0.335752	0.145169	2.31283	0.0207318	0.0372984
RS00440	threonine_synthase	1007.94	0.518048	0.0814814	6.35786	2.04578e-10	1.04615e-09
RS00445	MATE_family_efflux_transporter	1103.25	0.287586	0.0739311	3.88991	0.00010028	0.000268544
RS00450	30S_ribosomal_protein_S10	4402.27	-0.743879	0.06938	-10.7218	8.04096e-27	1.253e-25
RS00455	50S_ribosomal_protein_L3	6917.37	-0.770744	0.060431	-12.7541	2.95678e-37	8.0157e-36
RS00460	50S_ribosomal_protein_L4	9351.03	-0.741042	0.0545356	-13.5882	4.70326e-42	1.60478e-40
RS00465	50S_ribosomal_protein_L23	4988.33	-0.699512	0.0585029	-11.9569	5.97674e-33	1.35954e-31
RS00470	50S_ribosomal_protein_L2	13434.8	-0.740207	0.0539117	-13.73	6.71552e-43	2.37322e-41
RS00475	30S_ribosomal_protein_S19	5202.93	-0.691939	0.0571653	-12.1042	1.0036e-33	2.33661e-32
RS00480	50S_ribosomal_protein_L22	8491.78	-0.678045	0.0627996	-10.797	3.55738e-27	5.67747e-26
RS00485	30S_ribosomal_protein_S3	12816.4	-0.682836	0.0545005	-12.529	5.18195e-36	1.38582e-34
RS00490	50S_ribosomal_protein_L16	8332.46	-0.62354	0.0570697	-10.9259	8.66478e-28	1.47824e-26
RS00495	50S_ribosomal_protein_L29	4044.24	-0.637003	0.0650473	-9.79292	1.20761e-22	1.47523e-21
RS00500	30S_ribosomal_protein_S17	7104.21	-0.692951	0.0577146	-12.0065	3.28424e-33	7.55756e-32
RS00505	50S_ribosomal_protein_L14	6032.62	-0.643689	0.0633489	-10.161	2.95994e-24	4.0398e-23
RS00510	50S_ribosomal_protein_L24	6972.25	-0.751674	0.0635874	-11.8211	3.03628e-32	6.60308e-31
RS00515	50S_ribosomal_protein_L5	12189	-0.693772	0.0572139	-12.1259	7.69766e-34	1.83538e-32
RS00520	30S_ribosomal_protein_S14_type_Z	3825.3	-0.689522	0.0621154	-11.1007	1.24506e-28	2.19997e-27
RS00525	30S_ribosomal_protein_S8	7916.5	-0.742035	0.0622015	-11.9295	8.30524e-33	1.86773e-31
RS00530	50S_ribosomal_protein_L6	10960.5	-0.725903	0.0537312	-13.5099	1.36731e-41	4.58627e-40
RS00535	50S_ribosomal_protein_L18	5111.17	-0.784862	0.0595416	-13.1817	1.11772e-39	3.25289e-38
RS00540	30S_ribosomal_protein_S5	7641.26	-0.711727	0.0568223	-12.5255	5.41642e-36	1.42921e-34
RS00545	50S_ribosomal_protein_L30	3473.64	-0.724897	0.0645501	-11.23	2.90483e-29	5.52756e-28
RS00550	50S_ribosomal_protein_L15	7209.71	-0.748636	0.0571775	-13.0932	3.602e-39	1.03309e-37
RS00555	preprotein_translocase_subunit_SecY	34125.9	-0.725237	0.065026	-11.153	6.92074e-29	1.25653e-27
RS00560	adenylate_kinase	1511.66	-0.468194	0.0692301	-6.76287	1.35287e-11	7.60606e-11
RS00565	translation_initiation_factor_IF-1	8926.19	-0.593949	0.0622677	-9.53864	1.44711e-21	1.62718e-20
RS00570	50S_ribosomal_protein_L36	4256	-0.572266	0.0763573	-7.49458	6.65102e-14	4.65102e-13
RS00575	30S_ribosomal_protein_S13	9107.8	-0.686607	0.0556167	-12.3453	5.16172e-35	1.26112e-33
RS00580	30S_ribosomal_protein_S11	11740.1	-0.718	0.0533991	-13.4459	3.25335e-41	1.03845e-39
RS00585	DNA-directed_RNA_polymerase_subunit_alpha	16298.1	-0.757387	0.054432	-13.9144	5.18147e-44	1.86439e-42
RS00590	50S_ribosomal_protein_L17	13935.6	-0.804251	0.0565159	-14.2305	5.92465e-46	2.25479e-44
RS00680	hypothetical_protein	27.3396	0.205985	0.286642	0.718615	0.472378	0.573168
RS00685	hypothetical_protein	81.7943	0.432688	0.189165	2.28736	0.0221747	0.0396778
RS00690	hypothetical_protein	98.5866	0.314241	0.176574	1.77966	0.075132	0.120491
RS00695	hypothetical_protein	119.115	0.643703	0.165336	3.89331	9.88865e-05	0.000265531
RS00700	hypothetical_protein	3204.66	0.545083	0.0773615	7.04593	1.84227e-12	1.13225e-11
RS00705	hypothetical_protein	6.68747	0.370173	0.387061	0.956369	0.338886	0.438337
RS00710	histidine_phosphatase_family_protein	574.374	0.624269	0.0976041	6.39593	1.59571e-10	8.26678e-10
RS00715	D-alanyl-D-alanine_carboxypeptidase	1136.43	0.464936	0.0765532	6.07337	1.25254e-09	5.91594e-09
RS00720	N-acetylmuramoyl-L-alanine_amidase	1203.66	0.24333	0.0772349	3.15052	0.00162982	0.00361593
RS00725	heat-inducible_transcriptional_repressor_HrcA	2198.24	0.477551	0.0811006	5.88837	3.90013e-09	1.75817e-08
RS00730	nucleotide_exchange_factor_GrpE	2273.51	0.400068	0.0740184	5.40499	6.4813e-08	2.59646e-07
RS00735	molecular_chaperone_DnaK	14074.5	0.76823	0.0675192	11.3779	5.3854e-30	1.06577e-28
RS00740	chaperone_DnaJ	3956.93	0.752156	0.0706249	10.65	1.74353e-26	2.67477e-25
RS00745	GntR_family_transcriptional_regulator	227.207	0.341794	0.124407	2.74737	0.00600744	0.012119
RS00750	tRNA_pseudouridine(38-40)_synthase_TruA	522.106	0.0170061	0.0944282	0.180095	0.857078	0.889437
RS00755	hydroxymethylpyrimidine/phosphomethylpyrimidine_kinase	488.163	0.0655407	0.0928434	0.705927	0.480233	0.580638
RS00760	membrane_protein	173.199	0.0618773	0.147021	0.420874	0.673847	0.748266
RS00765	TIGR01440_family_protein	414.653	-0.1188	0.105667	-1.12429	0.26089	0.352905
RS00770	mechanosensitive_ion_channel_protein	881.21	0.123337	0.0845399	1.45892	0.144588	0.212928
RS00775	trigger_factor	18075.3	-0.47191	0.0674883	-6.99246	2.70106e-12	1.63468e-11
RS00780	DNA-directed_RNA_polymerase_subunit_delta	2713.31	-0.0736844	0.0612489	-1.20303	0.228964	0.315324
RS00785	CTP_synthetase	16457.6	1.01865	0.0815868	12.4855	8.95916e-36	2.33292e-34
RS00790	alpha/beta_hydrolase	1334.32	-0.0277501	0.0724719	-0.382908	0.701788	0.768588
RS00800	deoxyuridine_5'-triphosphate_nucleotidohydrolase	650.551	0.554966	0.100842	5.50334	3.72661e-08	1.52691e-07
RS00805	DNA_repair_protein_RadA	1778.58	0.19925	0.0732799	2.71903	0.00654735	0.0130938
RS00810	carbonate_dehydratase	3418.51	0.225366	0.0851489	2.64673	0.00812733	0.016004
RS00815	pyridine_nucleotide-disulfide_oxidoreductase	7485.76	1.35974	0.0655482	20.7441	1.38529e-95	2.10884e-93
RS00820	transposase	16.7443	0.077472	0.327075	0.236863	0.812763	0.855727
RS00825	glutamate--tRNA_ligase	3960.96	-0.388066	0.065584	-5.91708	3.27701e-09	1.48743e-08
RS00830	D-ribose_ABC_transporter_substrate-binding_protein	42.0972	-0.663129	0.258709	-2.56322	0.0103706	0.0198485
RS00835	ribose_ABC_transporter_permease	39.5298	-0.622738	0.259184	-2.40269	0.016275	0.0299611
RS00840	ribose_import_ATP-binding_protein_RbsA	33.1917	-0.632819	0.27505	-2.30074	0.0214062	0.038407
RS00845	D-ribose_pyranase	10.946	-0.0987677	0.367244	-0.268943	0.787973	0.835691
RS00850	ribokinase	93.6738	-1.29847	0.199019	-6.52435	6.82966e-11	3.62357e-10
RS00855	LacI_family_transcriptional_regulator	338.888	-1.00923	0.144883	-6.96578	3.26599e-12	1.95268e-11
RS00860	ABC_transporter_permease	17.7399	-0.813329	0.343391	-2.36852	0.0178593	0.0325447
RS00865	ABC_transporter_ATP-binding_protein	16.8459	0.120073	0.328834	0.365147	0.715001	0.778321
RS00870	DNA-binding_response_regulator	386.639	0.628313	0.108736	5.77834	7.54397e-09	3.32506e-08
RS00875	sensor_histidine_kinase	724.384	0.116712	0.0884024	1.32024	0.186755	0.264558
RS00880	argininosuccinate_synthase	14.8463	0.0944704	0.341696	0.276475	0.782183	0.831244
RS00885	argininosuccinate_lyase	30.7991	0.614453	0.282117	2.17801	0.0294055	0.0512718
RS00890	fructose-bisphosphate_aldolase	39854.5	0.0950374	0.0590388	1.60975	0.107453	0.164845
RS00895	L-lactate_dehydrogenase	3774.87	1.48335	0.0834001	17.786	9.07829e-71	8.98297e-69
RS00900	50S_ribosomal_protein_L28	31731.7	-0.281399	0.0567704	-4.9568	7.16638e-07	2.53255e-06
RS00905	Asp23/Gls24_family_envelope_stress_response_protein	2035.17	0.446317	0.0644779	6.92201	4.45291e-12	2.63054e-11
RS00910	dihydroxyacetone_kinase	14671.6	0.102877	0.0564986	1.82088	0.0686245	0.110593
RS00915	protease	1587.18	-0.134342	0.0855536	-1.57027	0.116352	0.17658
RS00920	hypothetical_protein	1484.09	-0.58182	0.118899	-4.8934	9.91073e-07	3.41696e-06
RS00925	hypothetical_protein	141.263	0.251984	0.162264	1.55292	0.120441	0.182227
RS00930	peptide_ABC_transporter_ATP-binding_protein	2882.06	-0.218803	0.0696883	-3.13974	0.00169099	0.0037349
RS00935	glutamine_ABC_transporter_substrate-binding_protein	3162.71	0.0236294	0.0598465	0.394834	0.692965	0.761877
RS00940	hypothetical_protein	1346.67	0.25941	0.0688096	3.76996	0.000163271	0.000423478
RS00945	undecaprenyl-diphosphatase	2749.67	-0.147729	0.0665682	-2.21921	0.0264726	0.0466096
RS00950	adaptor_protein_MecA	1268.03	0.415758	0.0733003	5.67199	1.41151e-08	6.0332e-08
RS00955	undecaprenyl-phosphate_alpha-N-acetylglucosaminyl_1-phosphate_transferase	4357.89	0.111766	0.062925	1.77618	0.0757033	0.121211
RS00960	ABC_transporter_ATP-binding_protein	1769.89	0.0873982	0.100883	0.866336	0.386306	0.485705
RS00965	Fe-S_cluster_assembly_protein_SufD	3679.44	-0.0078571	0.0936047	-0.0839392	0.933105	0.947954
RS00970	cysteine_desulfurase	3044.69	-0.0103086	0.10774	-0.0956797	0.923775	0.940407
RS00975	iron-sulfur_cluster_assembly_scaffold_protein	1235.88	-0.0410284	0.102983	-0.3984	0.690336	0.760253
RS00980	Fe-S_cluster_assembly_protein_SufB	3579.43	0.0298343	0.0723064	0.412609	0.679893	0.752521
RS00985	D-alanyl-D-alanine_carboxypeptidase	239.279	-0.0920063	0.137224	-0.670485	0.502549	0.599846
RS00990	D-alanyl-D-alanine_carboxypeptidase	1107.84	-0.212574	0.0781842	-2.71889	0.00655022	0.0130938
RS00995	ABC_transporter_substrate-binding_protein	4277.03	-0.655414	0.075146	-8.72188	2.73611e-18	2.72099e-17
RS01000	peptide_ABC_transporter_permease	1149.89	-0.420436	0.0797912	-5.2692	1.37019e-07	5.31688e-07
RS01005	peptide_ABC_transporter_permease	1181.68	-0.494696	0.0794167	-6.22911	4.6908e-10	2.31498e-09
RS01010	ABC_transporter_ATP-binding_protein	1345.03	-0.586404	0.0713177	-8.22242	1.99435e-16	1.71601e-15
RS01015	ABC_transporter_ATP-binding_protein	2062.17	-0.677308	0.0699009	-9.68954	3.34026e-22	3.93474e-21
RS01045	4-(cytidine_5'-diphospho)-2-C-methyl-D-erythritol_kinase	1482.26	0.834352	0.0700622	11.9087	1.06591e-32	2.34381e-31
RS01050	transcriptional_regulator	792.956	0.482984	0.0887332	5.4431	5.23615e-08	2.12779e-07
RS01055	zinc_ABC_transporter_ATP-binding_protein	1175.15	0.450559	0.0892694	5.04719	4.48359e-07	1.61328e-06
RS01060	zinc_ABC_transporter_permease	2420.59	0.232384	0.0734555	3.16361	0.00155828	0.00346888
RS01075	tyrosine--tRNA_ligase	2837.12	-0.201936	0.0661627	-3.05211	0.00227237	0.00493636
RS01080	penicillin-binding_protein_1B	5308.56	-0.157076	0.0610518	-2.57283	0.010087	0.0193808
RS01085	DNA-directed_RNA_polymerase_subunit_beta	10716.5	-0.994581	0.0688288	-14.4501	2.50472e-47	9.79111e-46
RS01090	DNA-directed_RNA_polymerase_subunit_beta'	13420.4	-1.11537	0.0647698	-17.2205	1.86418e-66	1.53717e-64
RS01095	dipicolinate_synthase	2045.61	-0.324378	0.200279	-1.61963	0.105311	0.16181
RS01105	competence_protein_CglB	14.6817	-0.00131438	0.348535	-0.00377116	0.996991	0.997495
RS01110	competence_protein_ComGF	15.1429	0.554697	0.341147	1.62598	0.103955	0.15985
RS01115	hypothetical_protein	24.0797	0.29702	0.303253	0.979447	0.327359	0.425373
RS01120	adenine_methyltransferase	1181.76	-0.0380715	0.0892881	-0.426389	0.669824	0.745547
RS01125	acetate_kinase	7128.63	-0.416871	0.0620129	-6.72233	1.78847e-11	9.99828e-11
RS01130	transcriptional_regulator	127.959	-0.165283	0.162018	-1.02016	0.307655	0.404014
RS01135	hypothetical_protein	250.436	-0.171702	0.12408	-1.3838	0.166419	0.240573
RS01140	CPBP_family_intramembrane_metalloprotease	779.597	0.0561004	0.0901888	0.622032	0.533921	0.6312
RS01145	pyrroline-5-carboxylate_reductase	1855.28	0.37735	0.077003	4.90047	9.56089e-07	3.31366e-06
RS01150	glutamyl_aminopeptidase	2360.83	0.456564	0.070719	6.45603	1.07487e-10	5.62745e-10
RS01155	hypothetical_protein	205.309	0.510878	0.134223	3.80618	0.000141127	0.000370413
RS01160	hypothetical_protein	375.96	0.422158	0.105628	3.99663	6.425e-05	0.000176353
RS01165	thiol_reductase_thioredoxin	821.844	0.3808	0.0864053	4.40714	1.04744e-05	3.21876e-05
RS01170	tRNA-binding_protein	1672.32	0.148394	0.0865716	1.71411	0.0865077	0.136477
RS01175	S-adenosylmethionine-dependent_methyltransferase	725.898	0.663548	0.0963794	6.88475	5.78892e-12	3.39949e-11
RS01180	Single-stranded_DNA-binding_protein_2	55.5927	0.755524	0.223076	3.38684	0.000707017	0.00166768
RS01185	haloacid_dehalogenase	690.341	0.422738	0.0913006	4.63018	3.65344e-06	1.18527e-05
RS01190	sensor_histidine_kinase	823.017	0.146599	0.0783758	1.87046	0.06142	0.100041
RS01195	DNA-binding_response_regulator	484.268	0.132777	0.102796	1.29165	0.196477	0.276549
RS01200	murein_hydrolase_transporter_LrgA	18.3723	0.23329	0.3418	0.682532	0.494902	0.593583
RS01205	antiholin	24.9231	-0.28773	0.300997	-0.955925	0.33911	0.43834
RS01210	hypothetical_protein	457.033	-0.14031	0.107884	-1.30056	0.193408	0.272812
RS01215	ABC_transporter_permease	104.191	-0.0968058	0.172553	-0.561019	0.574785	0.666764
RS01220	peptide_ABC_transporter_permease	116.427	-0.167498	0.165537	-1.01185	0.311612	0.407857
RS01225	ATPase	92.0755	-0.321511	0.19148	-1.67908	0.0931359	0.145589
RS01230	nickel_ABC_transporter_ATP-binding_protein	128.278	-0.343349	0.15635	-2.19602	0.0280906	0.0492394
RS01235	PTS_beta-glucoside_transporter_subunit_EIIBCA	732.036	-0.169584	0.238333	-0.71154	0.47675	0.577057
RS01240	alpha2Calpha-phosphotrehalase	383.122	0.918597	0.135926	6.75805	1.39865e-11	7.84116e-11
RS01245	transcription_antiterminator_BglG	227.394	-0.975057	0.128658	-7.57868	3.49085e-14	2.53055e-13
RS01250	PTS_lactose_transporter_subunit_IIB	12.8004	0.147866	0.352551	0.419418	0.674911	0.748266
RS01255	PTS_ascorbate_transporter_subunit_IIC	107.839	0.0662023	0.168687	0.392456	0.694721	0.76296
RS01260	carbohydrate_degradation_protein	101.07	-0.0299766	0.177377	-0.168999	0.865797	0.896605
RS01265	transketolase	132.359	-0.232215	0.1648	-1.40907	0.158813	0.231097
RS01270	oxidoreductase	632.563	0.474513	0.0999096	4.74943	2.03995e-06	6.79641e-06
RS01275	30S_ribosomal_protein_S15	11817	-0.196981	0.0866386	-2.2736	0.0229902	0.0409151
RS01280	polyribonucleotide_nucleotidyltransferase	3555.45	-0.126317	0.0627122	-2.01423	0.0439849	0.0740189
RS01285	hypothetical_protein	1284.44	-0.161588	0.0770672	-2.09672	0.0360183	0.0617679
RS01290	serine_acetyltransferase	1171.61	-0.13136	0.0742271	-1.7697	0.0767765	0.122533
RS01295	hypothetical_protein	405.102	-0.175967	0.10322	-1.70478	0.0882352	0.138806
RS01300	cysteine--tRNA_ligase	2780.84	-0.0854635	0.0625578	-1.36615	0.171891	0.246502
RS01305	hypothetical_protein	1091.32	0.077878	0.0769548	1.012	0.31154	0.407857
RS01310	23S_rRNA_(guanosine(2251)-2'-O)-methyltransferase_RlmB	919.553	0.229297	0.0869722	2.63644	0.00837814	0.0164324
RS01315	hypothetical_protein	591.192	-0.188981	0.0989563	-1.90974	0.0561661	0.0922429
RS01320	fatty_acid-binding_protein_DegV	3670.28	-0.827971	0.0694171	-11.9275	8.51256e-33	1.89285e-31
RS01325	transcriptional_regulator	38.136	-0.457302	0.260202	-1.75749	0.0788341	0.125638
RS01330	50S_ribosomal_protein_L13	12498.9	-0.241875	0.0593612	-4.07463	4.60874e-05	0.000128461
RS01335	30S_ribosomal_protein_S9	10861.7	-0.267259	0.0652002	-4.09905	4.14844e-05	0.000116121
RS01340	site-specific_integrase	1004.45	0.262286	0.0771977	3.39759	0.000679822	0.00161315
RS01345	transcriptional_regulator	430.267	0.149345	0.100325	1.48862	0.136588	0.202478
RS01350	hypothetical_protein	9.81785	-0.431326	0.374868	-1.15061	0.249894	0.339202
RS01355	hypothetical_protein	18.3876	-0.421377	0.328241	-1.28374	0.199232	0.27983
RS01360	hypothetical_protein	9.09642	0.0141786	0.372751	0.0380377	0.969658	0.977779
RS01365	hypothetical_protein	8.79441	0.0167165	0.375991	0.0444598	0.964538	0.973888
RS01370	hypothetical_protein	17.8037	-0.203533	0.328789	-0.619039	0.535891	0.632773
RS01375	hypothetical_protein	256.402	0.0826948	0.137457	0.601606	0.547437	0.642572
RS01380	restriction_endonuclease	2488.87	-0.207521	0.0790419	-2.62546	0.00865322	0.0168883
RS01385	hypothetical_protein	3299.81	-0.513466	0.0701725	-7.31721	2.53185e-13	1.69848e-12
RS01390	ATP-dependent_DNA_helicase_RecG	1351.71	-0.653634	0.078186	-8.35999	6.27258e-17	5.64247e-16
RS01395	hypothetical_protein	2.79831	-0.0315802	0.373143	-0.0846329	0.932553	0.94788
RS01400	hypothetical_protein	8.18333	0.567463	0.381525	1.48736	0.136921	0.202819
RS01405	MutR_family_transcriptional_regulator	132.519	0.596667	0.171812	3.47279	0.000515086	0.00124009
RS01410	MFS_transporter	118.297	0.524038	0.159871	3.27788	0.00104591	0.0024096
RS01415	amino_acid_ABC_transporter_permease	4684.18	0.736162	0.0767158	9.59596	8.31358e-22	9.56545e-21
RS01420	osmoprotectant_ABC_transporter_substrate-binding_protein	4016.34	0.731917	0.0590915	12.3862	3.10522e-35	7.68155e-34
RS01425	choline_ABC_transporter_permease	2035.81	0.643828	0.0722631	8.90951	5.12592e-19	5.33905e-18
RS01430	glycine/betaine_ABC_transporter_ATP-binding_protein	4565.3	0.761683	0.057358	13.2795	3.04606e-40	9.27409e-39
RS01515	hypothetical_protein	201.275	0.1266	0.138005	0.917358	0.358955	0.458897
RS01520	hypothetical_protein	868.341	-0.0351973	0.0960082	-0.366607	0.713912	0.777563
RS01525	hypothetical_protein	183.955	-0.0845647	0.150099	-0.563391	0.573168	0.66606
RS01530	hypothetical_protein	231.848	-0.0773305	0.136499	-0.566528	0.571035	0.665534
RS01535	acetyltransferase	832.024	0.695705	0.0989651	7.0298	2.0683e-12	1.26723e-11
RS01540	GNAT_family_N-acetyltransferase	748.28	0.591397	0.105162	5.62366	1.86955e-08	7.93956e-08
RS01545	acetyltransferase	1187.09	0.516657	0.0949994	5.43853	5.37226e-08	2.17863e-07
RS01550	hypothetical_protein	463.113	0.0365345	0.105407	0.346606	0.728888	0.788234
RS01555	DNA-directed_RNA_polymerase_sigma-70_factor	185.301	0.147358	0.136518	1.0794	0.280408	0.374698
RS01560	lipoprotein	13.0277	0.226244	0.349756	0.646861	0.517722	0.613966
RS01565	TetR_family_transcriptional_regulator	139.405	0.296334	0.150909	1.96366	0.049569	0.0823652
RS01570	antibiotic_ABC_transporter_permease	119.641	0.506004	0.162524	3.11341	0.00184938	0.00406207
RS01575	glycosyl_transferase_family_2	61.2377	0.827959	0.213825	3.87213	0.00010789	0.000285832
RS01580	hypothetical_protein	268.704	0.0297884	0.124248	0.239749	0.810525	0.85457
RS01585	PadR_family_transcriptional_regulator	60.1195	0.191154	0.215285	0.887911	0.374589	0.474895
RS01590	hypothetical_protein	1840.18	-0.664012	0.0784065	-8.46884	2.47857e-17	2.31372e-16
RS01595	N-acetylglucosamine-6-phosphate_deacetylase	1552.03	-0.393431	0.0790123	-4.97936	6.37953e-07	2.26662e-06
RS01600	isoprenylcysteine_carboxyl_methyltransferase	14.71	0.226783	0.350328	0.647344	0.517409	0.613966
RS01605	glycine--tRNA_ligase_subunit_alpha	2509.59	-0.619906	0.0817873	-7.57949	3.46918e-14	2.52408e-13
RS01610	FMN-dependent_NADH-azoreductase	1284.26	-0.689488	0.0855999	-8.05478	7.96227e-16	6.37948e-15
RS01615	glycine--tRNA_ligase_subunit_beta	5006.66	-0.547502	0.0681438	-8.03451	9.39548e-16	7.49744e-15
RS01620	hypothetical_protein	1334.15	-0.4911	0.0802472	-6.11984	9.36712e-10	4.48851e-09
RS01625	membrane_protein	50.9527	0.205754	0.224452	0.916693	0.359303	0.459045
RS01630	glycerol_kinase	275.999	-0.0847275	0.125721	-0.673935	0.500352	0.598307
RS01635	alpha-glycerophosphate_oxidase	202.53	0.169478	0.130966	1.29406	0.195644	0.275573
RS01640	glycerol_transporter	134.989	0.180222	0.155869	1.15624	0.247582	0.336977
RS01645	NADH_peroxidase	239.149	-0.707872	0.129061	-5.48477	4.14004e-08	1.6928e-07
RS01650	hypothetical_protein	325.386	-0.95142	0.114322	-8.32228	8.62871e-17	7.65749e-16
RS01655	transketolase	6165.14	-0.131771	0.0628089	-2.09797	0.0359081	0.0616324
RS01660	bacteriocin_immunity_protein	637.34	-0.0746328	0.0934168	-0.798922	0.424335	0.526165
RS01665	3-dehydroquinate_dehydratase	1733.16	-0.0906309	0.0694806	-1.30441	0.192096	0.27129
RS01670	ABC_transporter_permease	4919.48	-0.190247	0.0725597	-2.62193	0.00874327	0.0170304
RS01675	PTS_cellobiose_transporter_subunit_IIC	2747.81	-0.111089	0.2506	-0.44329	0.657556	0.735615
RS01680	glutamate_5-kinase	1877.91	0.202328	0.0691624	2.9254	0.00344017	0.00725038
RS01685	gamma-glutamyl-phosphate_reductase	4624.99	0.00768359	0.0595531	0.129021	0.897341	0.919171
RS01690	16S_rRNA_(cytosine(1402)-N(4))-methyltransferase	1708.12	-0.159376	0.071816	-2.21923	0.026471	0.0466096
RS01695	cell_division_protein_FtsL	566.171	-0.436223	0.0973529	-4.48085	7.43474e-06	2.32438e-05
RS01700	penicillin-binding_protein_2X	3402.84	-0.666528	0.0591087	-11.2763	1.71806e-29	3.33337e-28
RS01705	phospho-N-acetylmuramoyl-pentapeptide-transferase	1762.07	-0.895047	0.06741	-13.2777	3.11983e-40	9.35475e-39
RS01710	DEAD/DEAH_box_helicase	2693.84	-0.182745	0.0666867	-2.74036	0.00613723	0.0123431
RS01715	amino_acid_ABC_transporter_substrate-binding_protein	1872.38	0.675479	0.0794165	8.50553	1.80774e-17	1.71173e-16
RS01720	amino_acid_ABC_transporter_permease	2346.23	0.410269	0.0710802	5.77192	7.83734e-09	3.42386e-08
RS01725	amino_acid_ABC_transporter_ATP-binding_protein	3066.5	0.185946	0.0715044	2.60048	0.00930943	0.0180268
RS01730	membrane_protein	273.279	0.206961	0.119254	1.73547	0.0826572	0.131178
RS01735	thioredoxin-disulfide_reductase	4199.96	0.011422	0.0857048	0.133272	0.893979	0.917156
RS01740	nicotinate_phosphoribosyltransferase	2206.76	-0.187058	0.075214	-2.48701	0.0128822	0.0242799
RS01745	NAD(+)_synthetase	2246.74	-0.340038	0.0669227	-5.08105	3.75353e-07	1.37815e-06
RS01750	aminopeptidase_C	2107.33	-0.337709	0.0682323	-4.9494	7.44421e-07	2.62137e-06
RS01755	penicillin-binding_protein_1A	8207.34	-0.0658469	0.0578923	-1.1374	0.25537	0.345675
RS01760	Holliday_junction_resolvase_RecU	1660.66	0.00594183	0.0833567	0.071282	0.943173	0.957106
RS01765	hypothetical_protein	70.7191	-0.348105	0.201435	-1.72813	0.0839655	0.132722
RS01770	cell_cycle_protein_GpsB	2580.33	0.310497	0.0742751	4.18036	2.91046e-05	8.40648e-05
RS01775	RNA_methyltransferase	1254.01	-0.472964	0.0760838	-6.21636	5.08827e-10	2.49868e-09
RS01780	hypothetical_protein	5018.31	-0.312167	0.0563823	-5.53661	3.0838e-08	1.27675e-07
RS01785	S-ribosylhomocysteine_lyase	2935.63	0.0952034	0.0686628	1.38653	0.165584	0.23954
RS01790	ribonuclease_Y	4268.73	-0.718004	0.0631423	-11.3712	5.81809e-30	1.14e-28
RS01795	multidrug_ABC_transporter_ATP-binding_protein	157.201	0.544384	0.150114	3.62648	0.000287315	0.000715217
RS01800	ABC_transporter_permease	163.933	0.708574	0.143475	4.93865	7.86654e-07	2.76026e-06
RS01805	sensor_histidine_kinase	882.404	0.688254	0.0784966	8.76795	1.81943e-18	1.83707e-17
RS01810	DNA-binding_response_regulator	552.573	0.595342	0.0940335	6.33117	2.4331e-10	1.23149e-09
RS01815	DUF1211_domain-containing_membrane_protein	932.49	0.468722	0.0792766	5.91249	3.36967e-09	1.52599e-08
RS01820	guanylate_kinase	874.4	-0.496576	0.0801041	-6.19914	5.67739e-10	2.77421e-09
RS01825	DNA-directed_RNA_polymerase_subunit_omega	1692.53	-0.799972	0.075696	-10.5682	4.18349e-26	6.22491e-25
RS01830	primosomal_protein_N'	937.313	-0.225502	0.0794551	-2.8381	0.00453828	0.00941431
RS01835	methionyl-tRNA_formyltransferase	1215.82	0.167705	0.0821388	2.04173	0.0411785	0.0695327
RS01840	16S_rRNA_(cytosine(967)-C(5))-methyltransferase	2033.83	0.0515291	0.0927455	0.555597	0.578486	0.669488
RS01845	protein_phosphatase	2147.48	0.0144096	0.0671146	0.214701	0.830001	0.867708
RS01850	serine/threonine_protein_kinase	11257.2	-0.0944541	0.0556618	-1.69693	0.0897102	0.140902
RS01855	transporter	259.136	0.247605	0.123947	1.99767	0.0457525	0.0766673
RS01860	two-component_sensor_histidine_kinase	508.628	0.00998891	0.0951953	0.104931	0.916431	0.934372
RS01865	DNA-binding_response_regulator	294.355	-0.00691866	0.113846	-0.0607719	0.951541	0.964209
RS01870	peptidyl-prolyl_cis-trans_isomerase	3079.31	-0.198382	0.0706927	-2.80626	0.00501204	0.0102786
RS01875	hypothetical_protein	2329.99	-0.0614667	0.0812587	-0.756433	0.44939	0.553074
RS01880	pyruvate_formate_lyase-activating_protein	89.7685	0.0829493	0.197774	0.419414	0.674914	0.748266
RS01885	DeoR_family_transcriptional_regulator	672.856	0.0668776	0.0884724	0.755914	0.449701	0.553112
RS01890	DNA-binding_transcriptional_regulator	628.174	0.19719	0.0911229	2.164	0.0304642	0.0529312
RS01895	PTS_cellobiose_transporter_subunit_IIA	6.41882	-0.291491	0.388387	-0.750517	0.452943	0.554866
RS01900	PTS_sugar_transporter_subunit_IIB	6.79577	0.232863	0.38549	0.60407	0.545797	0.641409
RS01905	PTS_cellobiose_transporter_subunit_IIC	77.9083	0.0538996	0.195263	0.276037	0.78252	0.831244
RS01910	formate_C-acetyltransferase/glycerol_dehydratase_family_glycyl_radical_enzyme	177.373	0.059889	0.153852	0.389264	0.697081	0.765127
RS01915	fructose-bisphosphate_aldolase	62.4439	0.16429	0.218876	0.750607	0.452889	0.554866
RS01920	glycerol_dehydrogenase	152.146	0.246525	0.163842	1.50465	0.132415	0.197475
RS01925	cysteine_synthase_A	1914.67	0.0396852	0.0843915	0.470251	0.638175	0.718401
RS01930	YigZ_family_protein	315.907	0.240688	0.114626	2.09977	0.0357491	0.0615195
RS01935	competence_protein	9.34909	-0.233953	0.381402	-0.613402	0.539611	0.636406
RS01945	ribosomal_subunit_interface_protein	7857	0.0235455	0.0752036	0.31309	0.754212	0.808126
RS01975	aspartate_kinase	577.378	0.0975239	0.102226	0.954007	0.34008	0.439307
RS01980	haloacid_dehalogenase	623.151	-0.527996	0.102347	-5.15888	2.48435e-07	9.31161e-07
RS01985	enoyl-CoA_hydratase	9256.11	-0.693138	0.0646749	-10.7173	8.44629e-27	1.30588e-25
RS01990	transcriptional_regulator	5547.62	-0.430041	0.0932724	-4.61059	4.01522e-06	1.29205e-05
RS01995	ketoacyl-ACP_synthase_III	15397.4	-0.611764	0.0801279	-7.63484	2.26094e-14	1.68845e-13
RS02000	acyl_carrier_protein	11799	-0.710155	0.0697051	-10.188	2.24361e-24	3.08341e-23
RS02005	2-nitropropane_dioxygenase	8232.6	-0.831534	0.0767873	-10.8291	2.50708e-27	4.10042e-26
RS02010	malonyl_CoA-acyl_carrier_protein_transacylase	9160.69	-1.00325	0.0825974	-12.1463	6.00402e-34	1.44902e-32
RS02015	beta-ketoacyl-ACP_reductase	7369.65	-1.05578	0.0798018	-13.23	5.88589e-40	1.73853e-38
RS02020	beta-ketoacyl-[acyl-carrier-protein]_synthase_II	12693.9	-1.08465	0.0771587	-14.0574	6.93724e-45	2.59034e-43
RS02025	acetyl-CoA_carboxylase_biotin_carboxyl_carrier_protein_subunit	4718.16	-1.22408	0.0813048	-15.0555	3.17793e-51	1.53393e-49
RS02030	beta-hydroxyacyl-ACP_dehydratase	3962.22	-1.33915	0.0773976	-17.3022	4.52487e-67	3.89336e-65
RS02035	acetyl-CoA_carboxylase_biotin_carboxylase_subunit	11380.7	-1.45382	0.0735484	-19.7669	5.74413e-87	7.57842e-85
RS02040	acetyl-CoA_carboxylase_carboxyl_transferase_subunit_beta	5518.86	-1.58646	0.0853298	-18.5921	3.72301e-77	4.33402e-75
RS02045	acetyl-CoA_carboxylase_carboxyl_transferase_subunit_alpha	8446.11	-1.83786	0.0805016	-22.8301	2.30223e-115	5.06234e-113
RS02050	hypothetical_protein	783.349	0.327087	0.105846	3.09022	0.00200011	0.00436737
RS02055	serine--tRNA_ligase	2285.5	-0.316265	0.0665979	-4.74888	2.04542e-06	6.80319e-06
RS02060	membrane_protein	2295.93	-0.309911	0.103922	-2.98216	0.00286226	0.00611707
RS02065	PTS_mannose_transporter_accessory_protein_ManO	1506.68	-0.236325	0.07386	-3.19963	0.00137605	0.00308403
RS02070	PTS_mannose_transporter_subunit_IID	9627.41	-1.02819	0.0870103	-11.8169	3.19385e-32	6.87026e-31
RS02075	PTS_mannose/fructose/sorbose_transporter_subunit_IIC	5991.14	-0.952607	0.0877087	-10.861	1.76755e-27	2.93949e-26
RS02080	PTS_mannose_transporter_subunit_EIIAB	5849.87	-1.16085	0.071659	-16.1996	5.07366e-59	2.95317e-57
RS02085	haloacid_dehalogenase	914.119	-0.203911	0.078205	-2.60739	0.00912363	0.0177016
RS02090	hypothetical_protein	1526.71	-0.0357314	0.0780813	-0.457618	0.647227	0.727349
RS02095	membrane_protein	588.29	0.258953	0.101236	2.5579	0.0105306	0.0201159
RS02100	NCS2_family_permease	302.194	0.453366	0.117847	3.84707	0.00011954	0.000315426
RS02105	tRNA_(adenosine(37)-N6)-threonylcarbamoyltransferase_complex_ATPase_subunit_type_1_TsaE	403.426	0.163421	0.110677	1.47655	0.139796	0.206614
RS02110	N-acetyltransferase	775.85	0.0637263	0.0889752	0.716226	0.473852	0.5739
RS02115	transporter	4384.47	-0.302532	0.0588481	-5.14089	2.73438e-07	1.01908e-06
RS02120	hypothetical_protein	1164.09	0.446972	0.0818434	5.46131	4.72639e-08	1.92856e-07
RS02125	histidine_triad_protein	645.009	0.644792	0.0923892	6.97909	2.97094e-12	1.78708e-11
RS02130	hypothetical_protein	142.265	-0.352755	0.154333	-2.28567	0.0222733	0.0398183
RS02135	multidrug_ABC_transporter_ATP-binding_protein	179.612	-0.0144052	0.140754	-0.102343	0.918485	0.935502
RS02140	multidrug_ABC_transporter_permease	439.613	-0.165015	0.0997227	-1.65474	0.0979779	0.151958
RS02145	aminoglycoside_phosphotransferase	1116.02	-0.120159	0.0796876	-1.50788	0.131585	0.196386
RS02150	tRNA_(guanosine(46)-N7)-methyltransferase_TrmB	1288.03	-0.329687	0.0868377	-3.79659	0.000146702	0.000383519
RS02160	ribosome_maturation_factor_RimP	744.874	-0.257958	0.107335	-2.40329	0.0162484	0.0299399
RS02165	transcription_termination/antitermination_protein_NusA	2282.5	-0.466592	0.0679282	-6.8689	6.47001e-12	3.78821e-11
RS02170	hypothetical_protein	742.34	-0.513643	0.0928363	-5.53278	3.15192e-08	1.30222e-07
RS02175	hypothetical_protein	764.598	-0.452943	0.0981994	-4.61248	3.97894e-06	1.28561e-05
RS02180	translation_initiation_factor_IF-2	7250.67	-0.543208	0.0673257	-8.06837	7.12432e-16	5.77829e-15
RS02185	ribosome-binding_factor_A	2102.28	-0.54228	0.0727907	-7.44986	9.34388e-14	6.42067e-13
RS02190	esterase	41.0693	-0.10267	0.247046	-0.415589	0.677711	0.750526
RS02195	uracil_phosphoribosyltransferase	99.9341	0.061214	0.176139	0.347532	0.728192	0.788234
RS02200	copper-translocating_P-type_ATPase	741.271	-0.149831	0.0855403	-1.75159	0.0798445	0.126918
RS02205	carbonate_dehydratase	169.952	-0.118868	0.141732	-0.838678	0.40165	0.502126
RS02210	hypothetical_protein	632.869	0.525898	0.0849182	6.193	5.9031e-10	2.8774e-09
RS02215	haloacid_dehalogenase	1464.34	0.461059	0.0753509	6.11882	9.42681e-10	4.5062e-09
RS02220	DNA_polymerase_I	3445.89	-0.241785	0.0588259	-4.11019	3.95338e-05	0.000111291
RS02225	CoA-binding_protein	910.423	-0.241403	0.0852001	-2.83336	0.00460612	0.0095414
RS02230	transcriptional_repressor	2841.15	-0.295972	0.0665087	-4.45012	8.58233e-06	2.66632e-05
RS02235	YSIRK_signal_domain/LPXTG_anchor_domain_surface_protein	23.8333	-1.01595	0.310204	-3.27511	0.00105622	0.00243053
RS02240	DNA-binding_response_regulator	216.415	-0.139135	0.127659	-1.0899	0.275758	0.369232
RS02245	two-component_sensor_histidine_kinase	529.113	-0.422835	0.0970906	-4.35506	1.3303e-05	4.01933e-05
RS02250	membrane_protein	1709.96	-0.0111106	0.0758219	-0.146536	0.883498	0.910648
RS02255	tRNA_guanosine(34)_transglycosylase_Tgt	1940.28	-0.225334	0.0698237	-3.22719	0.00125013	0.00284368
RS02260	hypothetical_protein	638.063	-0.265538	0.094081	-2.82244	0.004766	0.00981468
RS02265	BioY_family_transporter	1174.13	-0.424049	0.0836692	-5.06816	4.01675e-07	1.46663e-06
RS02270	metal-dependent_hydrolase	1769.68	1.03144	0.0694783	14.8455	7.43934e-50	3.42382e-48
RS02275	tRNA-specific_adenosine_deaminase	1270.41	0.88274	0.092512	9.54189	1.40251e-21	1.58604e-20
RS02285	glucose-6-phosphate_isomerase	15021.3	-0.48543	0.0669926	-7.24602	4.29188e-13	2.80318e-12
RS02290	5-formyltetrahydrofolate_cyclo-ligase	368.648	0.751308	0.114014	6.58964	4.40896e-11	2.37748e-10
RS02295	rhomboid_family_intramembrane_serine_protease	289.391	0.0252925	0.117613	0.215048	0.82973	0.867708
RS02300	membrane_protein	1030.11	-0.00844827	0.0761375	-0.110961	0.911648	0.931896
RS02305	UTP--glucose-1-phosphate_uridylyltransferase	3422.99	-0.149942	0.0686996	-2.18258	0.0290668	0.0507707
RS02310	glycerol-3-phosphate_dehydrogenase	2183.37	-0.155188	0.0636398	-2.43854	0.0147466	0.0275058
RS02315	ribonuclease_P_protein_component	457.35	0.331904	0.100346	3.30759	0.000941016	0.00218511
RS02320	protein_translocase_component_YidC	1379.72	-0.220831	0.0710726	-3.10712	0.00188923	0.00414499
RS02325	Jag_protein	2590.96	-0.355113	0.0674792	-5.26256	1.42065e-07	5.49115e-07
RS02385	hypothetical_protein	2283.24	-0.14564	0.0710459	-2.04994	0.0403698	0.0682836
RS02390	recombination_regulator_RecX	289.307	-0.0936806	0.115908	-0.808231	0.418957	0.520802
RS02395	23S_rRNA_(uracil-5-)-methyltransferase_RumA	477.544	0.104247	0.0967201	1.07783	0.281112	0.375131
RS02400	hypothetical_protein	132.776	0.203853	0.15217	1.33964	0.180363	0.256191
RS02405	GNAT_family_acetyltransferase	390.765	0.51217	0.107488	4.76491	1.88937e-06	6.33741e-06
RS02410	hypothetical_protein	126.9	0.0499573	0.173549	0.287857	0.773456	0.823826
RS02415	glycosyl_transferase_family_2	153.132	-0.455083	0.158037	-2.8796	0.00398182	0.00832104
RS02420	ribonucleoside-diphosphate_reductase	59.1083	-0.508659	0.219389	-2.31852	0.020421	0.0367726
RS02425	class_Ib_ribonucleoside-diphosphate_reductase_assembly_flavoprotein_NrdI	27.5646	-0.416616	0.286939	-1.45193	0.14652	0.215426
RS02430	ribonucleoside-diphosphate_reductase_subunit_alpha	170.79	-0.463953	0.163023	-2.84594	0.0044281	0.00919539
RS02435	cell_surface_protein	299.413	-0.797368	0.125487	-6.35419	2.09527e-10	1.0687e-09
RS02440	hypothetical_protein	53.1332	-0.66487	0.228667	-2.90759	0.00364224	0.00764087
RS02455	AraC_family_transcriptional_regulator	65.0946	0.0743438	0.206566	0.359904	0.718919	0.780568
RS02460	hypothetical_protein	32.9293	0.407291	0.266725	1.52701	0.126759	0.190621
RS02465	4-carboxymuconolactone_decarboxylase	44.2285	0.349285	0.24831	1.40665	0.159532	0.231632
RS02470	cupin	27.1266	0.453234	0.293598	1.54372	0.122655	0.185294
RS02475	MerR_family_transcriptional_regulator	216.003	0.837881	0.131259	6.38343	1.7317e-10	8.94788e-10
RS02480	Zn-dependent_alcohol_dehydrogenase	332.76	1.02384	0.128548	7.96462	1.65734e-15	1.31195e-14
RS02485	22C5-diketo-D-gluconic_acid_reductase	173.758	0.461089	0.157123	2.93457	0.00334011	0.0070696
RS02490	cation_efflux_system_protein	1314.73	1.00935	0.109963	9.17903	4.34976e-20	4.70392e-19
RS02495	TetR_family_transcriptional_regulator	134.77	0.119817	0.158802	0.754502	0.450548	0.55381
RS02500	YSIRK-targeted_surface_antigen_transcriptional_regulator	546.694	0.806441	0.108607	7.42528	1.12545e-13	7.70681e-13
RS02505	YSIRK_signal_domain/LPXTG_anchor_domain_surface_protein	926.401	0.238148	0.0804153	2.96147	0.00306171	0.00652221
RS02510	DNA-damage-inducible_protein_J	93.1105	0.390689	0.188037	2.07772	0.0377351	0.0645443
RS02515	hypothetical_protein	116.703	0.126401	0.163265	0.77421	0.438807	0.541396
RS02520	lipoprotein	509.007	0.0207964	0.106759	0.194797	0.845552	0.881529
RS02525	hypothetical_protein	18.9666	0.113222	0.316109	0.358173	0.720214	0.781416
RS02540	SAM-dependent_methyltransferase	494.037	-0.5024	0.0995336	-5.04754	4.47529e-07	1.61322e-06
RS02545	aldose_1-epimerase	171.082	0.353735	0.138511	2.55384	0.0106543	0.0203326
RS02550	hypothetical_protein	576.308	-0.183358	0.0941731	-1.94703	0.0515306	0.0849118
RS02555	N-acetyltransferase	351.795	-0.561662	0.112721	-4.98275	6.2686e-07	2.23122e-06
RS02570	valine--tRNA_ligase	3396.58	-0.668924	0.0619229	-10.8025	3.34808e-27	5.43102e-26
RS02575	hypothetical_protein	1727.26	0.35381	0.080716	4.38339	1.16844e-05	3.56293e-05
RS02580	CRISPR-associated_endonuclease_Cas3''	440.193	-0.732528	0.114833	-6.37907	1.78171e-10	9.1823e-10
RS02585	oxidoreductase	1436.53	0.240067	0.0786841	3.05103	0.00228058	0.00494876
RS02590	hypothetical_protein	2184.67	0.367937	0.0685305	5.36895	7.91974e-08	3.12838e-07
RS02595	hypothetical_protein	241.088	0.189848	0.123356	1.53903	0.123797	0.186876
RS02600	asparagine_synthetase_A	710.166	-0.162575	0.109578	-1.48365	0.137903	0.204121
RS02605	bacteriocin_transport_accessory_protein	817.472	0.257954	0.104526	2.46785	0.0135928	0.025522
RS02610	rRNA_methyltransferase	393.929	0.483198	0.110181	4.38548	1.15731e-05	3.53445e-05
RS02615	hypothetical_protein	273.374	0.154243	0.123255	1.25141	0.210785	0.294385
RS02620	pantetheine-phosphate_adenylyltransferase	484.453	0.196931	0.104663	1.88156	0.0598958	0.0979618
RS02625	peptidase_S16	953.974	0.166508	0.0853315	1.95131	0.0510202	0.0843912
RS02630	phosphoesterase	378.565	0.368155	0.114259	3.22212	0.00127247	0.00289118
RS02635	transcriptional_regulator	833.624	0.146986	0.0849759	1.72974	0.0836775	0.132372
RS02640	23S_rRNA_(adenine(2503)-C(2))-methyltransferase_RlmN	1760.23	0.0340911	0.0791684	0.430615	0.666748	0.742541
RS02645	teicoplanin_resistance_protein_VanZ	962.902	-0.231362	0.0827042	-2.79747	0.00515051	0.0105298
RS02650	multidrug_ABC_transporter_permease/ATP-binding_protein	1186.67	0.240248	0.0891414	2.69514	0.00703595	0.0140082
RS02655	multidrug_ABC_transporter_ATP-binding_protein	1252.78	0.288722	0.0840385	3.4356	0.000591254	0.00140975
RS02660	glutamine_amidotransferase	575.485	0.431693	0.102787	4.19987	2.67071e-05	7.77255e-05
RS02665	biotin_transporter_BioY	42.4831	-0.288893	0.250824	-1.15178	0.249413	0.339003
RS02670	biotin_synthase	37.4691	-0.224209	0.269775	-0.831096	0.40592	0.506823
RS02675	hypothetical_protein	12.7063	0.325424	0.354521	0.917927	0.358657	0.458812
RS02680	acetyl-CoA_acetyltransferase	29.7102	-0.330735	0.278776	-1.18638	0.235471	0.322233
RS02685	long-chain-fatty-acid--CoA_ligase	42.0809	0.0857915	0.256041	0.33507	0.737573	0.794155
RS02690	endonuclease_III	995.385	0.0862135	0.0937292	0.919815	0.35767	0.458141
RS02695	prepilin_peptidase	6.79767	-0.564933	0.387245	-1.45885	0.144606	0.212928
RS02700	hypothetical_protein	371.537	0.274165	0.109509	2.50357	0.0122946	0.0232833
RS02705	glucokinase	1238.27	0.0182105	0.0737202	0.247022	0.804891	0.849989
RS02710	NADH_dehydrogenase	1147.62	-0.249486	0.0944421	-2.64168	0.00824954	0.0162285
RS02715	translational_GTPase_TypA	14404.5	-0.00792498	0.055822	-0.141969	0.887105	0.913363
RS02720	membrane_protein	4445.01	-0.221092	0.069064	-3.20127	0.00136825	0.00307002
RS02725	UDP-N-acetylmuramoyl-L-alanine--D-glutamate_ligase	1410.32	0.297476	0.0677784	4.38894	1.13902e-05	3.48397e-05
RS02730	undecaprenyldiphospho-muramoylpentapeptide_beta-N-_acetylglucosaminyltransferase	1512.92	0.165111	0.068682	2.40399	0.0162174	0.0299108
RS02735	cell_division_protein_FtsQ	2661.71	0.159804	0.0663344	2.40906	0.0159937	0.0295533
RS02740	cell_division_protein_FtsA	6335.42	-0.214654	0.0663252	-3.23638	0.00121055	0.00275682
RS02745	cell_division_protein_FtsZ	8844.76	-0.12896	0.0627477	-2.05521	0.0398583	0.0676498
RS02750	YggS_family_pyridoxal_phosphate_enzyme	5258.55	-0.150855	0.0644725	-2.33983	0.0192925	0.0349313
RS02755	cell_division_protein_SepF	4170.42	-0.077388	0.0641402	-1.20654	0.227607	0.313674
RS02760	membrane_protein	1606.29	-0.124333	0.0700419	-1.77512	0.0758785	0.121393
RS02765	RNA-binding_protein	6171.07	0.0464891	0.0560368	0.829617	0.406755	0.507546
RS02770	cell_division_protein_DivIVA	5697.75	0.0254922	0.060531	0.421144	0.67365	0.748266
RS02775	isoleucine--tRNA_ligase	9957.56	-0.176515	0.0539551	-3.27153	0.00106968	0.00245866
RS02780	hypothetical_protein	4576.98	0.764463	0.0718177	10.6445	1.84995e-26	2.81619e-25
RS02785	NUDIX_hydrolase	117.88	0.547199	0.181225	3.01945	0.00253233	0.00547702
RS02790	ATP-dependent_Clp_protease_ATP-binding_subunit	5071.87	0.495893	0.0858293	5.77767	7.57419e-09	3.32834e-08
RS02795	hypothetical_protein	2370.71	-0.0082737	0.116876	-0.0707907	0.943564	0.957106
RS02800	glutamine_ABC_transporter_permease	138.257	-0.0764929	0.153062	-0.499749	0.617252	0.704058
RS02805	peptide_ABC_transporter_ATP-binding_protein	223.817	-0.0765752	0.129576	-0.590966	0.554543	0.648222
RS02810	phosphoglucomutase	2012.57	-0.0642024	0.0632661	-1.0148	0.310201	0.407088
RS02815	bifunctional_methylenetetrahydrofolate_dehydrogenase/methenyltetrahydrofolate_cyclohydrolase	959.576	0.374307	0.0803005	4.66133	3.14173e-06	1.02636e-05
RS02820	NAD(P)H-hydrate_dehydratase	1572.45	0.0270211	0.0679183	0.397847	0.690743	0.760279
RS02825	exodeoxyribonuclease_VII_large_subunit	1759.6	0.0824853	0.0691221	1.19333	0.232741	0.319414
RS02830	exodeoxyribonuclease_7_small_subunit	268.248	0.182464	0.115556	1.57901	0.114334	0.17366
RS02835	geranyltranstransferase	929.713	0.112666	0.0810161	1.39066	0.164329	0.238072
RS02840	TlyA_family_rRNA_(cytidine-2'-O)-methyltransferase	1057.64	-0.000168189	0.0743895	-0.00226092	0.998196	0.998196
RS02845	ArgR_family_transcriptional_regulator	863.184	-0.140624	0.0885694	-1.58773	0.112348	0.171292
RS02850	DNA_repair_protein_RecN	2662.29	-0.165784	0.0633227	-2.61808	0.00884264	0.0171902
RS02855	hypothetical_protein	2304.05	-0.224004	0.0665831	-3.36428	0.000767426	0.00180587
RS02860	lipase	959.746	-0.329225	0.0767308	-4.29066	1.78145e-05	5.29353e-05
RS02865	membrane_protein	556.279	-0.535659	0.0931706	-5.74923	8.96503e-09	3.8993e-08
RS02870	transcriptional_regulator	30364.8	0.318569	0.0674041	4.72625	2.28704e-06	7.59404e-06
RS02875	hypothetical_protein	1062.25	2.36452	0.0905706	26.107	3.0391e-150	1.0024e-147
RS02880	dihydroorotate_oxidase	135.885	0.292519	0.151384	1.9323	0.0533226	0.0876456
RS02885	peptidoglycan_branched_peptide_synthesis_protein	5361.87	-0.0889859	0.0586721	-1.51667	0.129351	0.193782
RS02890	UDP-N-acetylmuramoylpentapeptide-lysine_N(6)-alanyltransferase	3373.67	-0.0817169	0.0595705	-1.37177	0.170136	0.244162
RS02895	UDP-N-acetylmuramoylpentapeptide-lysine_N(6)-alanyltransferase	3696.7	0.088091	0.0583699	1.50918	0.131252	0.196035
RS02900	sugar-phosphatase	2338.9	0.0741363	0.0687138	1.07891	0.280626	0.374736
RS02905	phosphohydrolase	1134.05	-0.0207254	0.0804558	-0.257599	0.796716	0.843607
RS02910	hypothetical_protein	337.434	0.486974	0.123364	3.94746	7.89854e-05	0.00021501
RS02915	calcium-translocating_P-type_ATPase2C_PMCA-type	7072.95	0.546516	0.0725132	7.53678	4.81704e-14	3.45395e-13
RS02920	phosphoesterase	531.796	0.389188	0.0931127	4.17975	2.91827e-05	8.40648e-05
RS02925	fructose-bisphosphatase_class_III	443.442	-0.266863	0.101269	-2.63519	0.00840898	0.0164766
RS02930	epoxyqueuosine_reductase	668.091	-0.129256	0.108372	-1.1927	0.232988	0.319531
RS02935	peptide_chain_release_factor_2	1850.52	0.0603423	0.0666232	0.905725	0.365082	0.464927
RS02940	cell_division_ATP-binding_protein_FtsE	1369.17	-0.0389782	0.0742635	-0.524863	0.599678	0.689177
RS02945	ABC_transporter_permease	3145.73	-0.10016	0.0680959	-1.47086	0.141328	0.208567
RS02955	IS3_family_transposase	378.37	0.0392966	0.106696	0.368303	0.712647	0.776832
RS02960	thioesterase	1866.72	-0.0734527	0.0702074	-1.04623	0.295457	0.391372
RS02965	hypothetical_protein	1242.43	0.233712	0.0731646	3.19434	0.00140153	0.00313759
RS02970	acetoin_reductase	4402.21	0.3822	0.0913949	4.18185	2.8915e-05	8.37815e-05
RS02975	bifunctional_DnaQ_family_exonuclease/ATP-dependent_helicase	908.544	-0.738999	0.0788323	-9.37432	6.96235e-21	7.78445e-20
RS02980	aspartate_aminotransferase	1917.26	-0.5491	0.0744474	-7.37568	1.63509e-13	1.11198e-12
RS02985	asparagine--tRNA_ligase	3118.93	-0.752071	0.0825241	-9.11336	7.98725e-20	8.59063e-19
RS02990	membrane_protein	1427.09	-0.778317	0.0925948	-8.40562	4.25611e-17	3.89946e-16
RS02995	hypothetical_protein	1824.49	-0.748876	0.0723836	-10.3459	4.36602e-25	6.26112e-24
RS03000	hypothetical_protein	295.357	0.495926	0.111543	4.44603	8.74701e-06	2.70897e-05
RS03005	RNase_adaptor_protein_RapZ	828.929	0.357118	0.0832736	4.28848	1.79896e-05	5.33756e-05
RS03010	YvcK_family_protein	1019.07	0.066245	0.0749842	0.883453	0.376992	0.47733
RS03015	sporulation_protein	1089.41	-0.00427661	0.0844701	-0.0506287	0.959621	0.969914
RS03020	dipeptidase	2291.98	-0.107977	0.0648763	-1.66435	0.0960431	0.149426
RS03025	zinc_ABC_transporter_substrate-binding_protein_AdcA	1638.37	-0.986781	0.0930821	-10.6012	2.94225e-26	4.41114e-25
RS03030	50S_ribosomal_protein_L31_type_B	23310.8	0.0531448	0.0594595	0.893798	0.37143	0.471192
RS03035	oligoribonuclease	1649.19	0.457466	0.0904039	5.06024	4.18731e-07	1.52049e-06
RS03040	adenosine_deaminase	81.0862	0.546199	0.189271	2.88581	0.00390409	0.00816722
RS03045	flavodoxin	1140.26	-0.255489	0.0804699	-3.17497	0.00149852	0.00334336
RS03050	chorismate_mutase	177.364	0.0524801	0.15336	0.342202	0.732199	0.790519
RS03055	voltage-gated_chloride_channel_protein	1052.34	-0.0893349	0.0802018	-1.11388	0.265332	0.357836
RS03060	50S_ribosomal_protein_L19	9847.18	-0.256593	0.0601151	-4.26836	1.96916e-05	5.83378e-05
RS03070	hypothetical_protein	3.71924	0.231812	0.380273	0.609594	0.542131	0.638617
RS03075	transposase	223.161	-0.339837	0.146268	-2.32339	0.0201582	0.0363324
RS03090	ABC_transporter_permease	343.176	-0.846267	0.115439	-7.33084	2.28716e-13	1.5501e-12
RS03095	ABC_transporter_ATP-binding_protein	240.827	-0.777415	0.129668	-5.99544	2.02937e-09	9.40543e-09
RS03100	peptide_ABC_transporter_permease	492.498	-0.665031	0.0948084	-7.01448	2.30813e-12	1.40547e-11
RS03105	DNA-binding_response_regulator	118.085	-0.0866947	0.165923	-0.522501	0.601322	0.689864
RS03110	two-component_sensor_histidine_kinase	336.095	-0.321555	0.107676	-2.98631	0.00282368	0.00604114
RS03115	IS3_family_transposase	38.0724	-0.953885	0.264585	-3.60522	0.000311894	0.000772513
RS03120	CsbD_family_protein	8486.28	1.16148	0.0803818	14.4496	2.52323e-47	9.79111e-46
RS03125	rod_shape-determining_protein_RodA	2548.55	0.0632303	0.0688017	0.919023	0.358083	0.458374
RS03130	hydrolase	921.823	0.0913587	0.0876744	1.04202	0.297402	0.393158
RS03135	DNA_gyrase_subunit_B	3794.9	-0.144314	0.0579026	-2.49236	0.0126897	0.0239398
RS03140	septation_ring_formation_regulator_EzrA	6063.98	-0.242392	0.0604802	-4.00779	6.12893e-05	0.00016893
RS03145	phosphoserine_phosphatase_SerB	238.984	0.0261107	0.130096	0.200703	0.840931	0.877744
RS03150	NUDIX_hydrolase	280.668	0.530618	0.12125	4.37622	1.20755e-05	3.67087e-05
RS03155	hypothetical_protein	241.823	0.772178	0.14303	5.39873	6.71155e-08	2.67785e-07
RS03160	enolase	61680.7	-0.10129	0.0563725	-1.79679	0.0723691	0.116155
RS03165	endonuclease	108.024	-0.307339	0.170472	-1.80287	0.0714083	0.114799
RS03170	3-phosphoshikimate_1-carboxyvinyltransferase	1167.74	0.435991	0.0777414	5.60822	2.04413e-08	8.64388e-08
RS03175	shikimate_kinase	516.86	0.112305	0.0966899	1.1615	0.24544	0.334522
RS03180	LytR_family_transcriptional_regulator	2166.42	0.0935842	0.0717603	1.30412	0.192192	0.27129
RS03185	RNA_methyltransferase	498.506	-0.36046	0.103535	-3.48152	0.000498579	0.00120181
RS03190	hypothetical_protein	191.653	-0.671284	0.147584	-4.54849	5.4032e-06	1.71361e-05
RS03195	acid_phosphatase/phosphotransferase	822.973	-0.278049	0.0846621	-3.28422	0.00102266	0.00236431
RS03200	ClbS/DfsB_family_four-helix_bundle_protein	765.021	-0.54213	0.0921282	-5.88452	3.99206e-09	1.79552e-08
RS03215	cell_wall_surface_anchor_protein	8.65001	-0.654187	0.383434	-1.70612	0.0879849	0.138522
RS03220	IS3_family_transposase	494.377	-0.720069	0.0960419	-7.49744	6.50754e-14	4.56681e-13
RS03230	molecular_chaperone_Hsp33	131.692	-0.906386	0.161744	-5.60383	2.09671e-08	8.8285e-08
RS03235	YSIRK-targeted_surface_antigen_transcriptional_regulator	1051.04	-0.389331	0.093844	-4.1487	3.34368e-05	9.52107e-05
RS03240	cell_wall_surface_anchor_protein	402.931	-0.0609153	0.108738	-0.560203	0.575341	0.666874
RS03245	hypothetical_protein	43.8007	0.0972167	0.251498	0.386551	0.699089	0.766905
RS03250	class_C_sortase	53.2496	0.118427	0.232285	0.509834	0.610168	0.697586
RS03255	class_C_sortase	38.1012	-0.171965	0.260028	-0.661334	0.508398	0.605367
RS03260	cell_wall_surface_anchor_protein	280.424	0.293953	0.12496	2.35238	0.0186537	0.0338988
RS03265	class_C_sortase	96.5517	-0.0725224	0.178099	-0.407202	0.68386	0.755222
RS03270	hypothetical_protein	2.97522	0.0979306	0.374435	0.261542	0.793674	0.840836
RS03275	hypothetical_protein	1.61294	-0.296366	0.313455	-0.945482	0.344413	NA
RS03285	hypothetical_protein	2.99803	0.737627	0.367544	2.00691	0.0447597	0.0751948
RS03290	serine_hydrolase	2880.97	0.434545	0.0660438	6.57965	4.71553e-11	2.53588e-10
RS03295	ABC_transporter_ATPase	98.8089	-0.671849	0.178608	-3.76158	0.000168842	0.000436211
RS03300	antibiotic_ABC_transporter_permease	91.9469	-0.673205	0.185727	-3.62471	0.000289289	0.000718322
RS03305	multidrug_ABC_transporter_permease	127.399	-0.589978	0.160766	-3.66979	0.000242747	0.000613532
RS03310	hypothetical_protein	25.434	0.0875069	0.295093	0.296541	0.766817	0.817635
RS03315	hypothetical_protein	49.4313	0.184427	0.230673	0.799517	0.423991	0.526067
RS03320	SDR_family_oxidoreductase	52.8941	0.372674	0.225809	1.65039	0.0988627	0.15321
RS03325	acyl_carrier_protein	25.4228	0.184263	0.291103	0.632983	0.526745	0.623089
RS03330	beta-hydroxyacyl-ACP_dehydratase	49.8772	0.158943	0.239188	0.664511	0.506363	0.60361
RS03335	ABC_transporter_ATP-binding_protein	87.7107	-0.0923669	0.197667	-0.467286	0.640295	0.719969
RS03340	ABC_transporter_permease	102.803	-0.21815	0.175519	-1.24289	0.213909	0.297907
RS03345	hypothetical_protein	292.265	-0.0249377	0.12042	-0.20709	0.83594	0.872995
RS03350	hypothetical_protein	141.85	-0.142582	0.152158	-0.937065	0.348725	0.448135
RS03355	hypothetical_protein	352.929	-0.0531236	0.112708	-0.47134	0.637398	0.717935
RS03360	hypothetical_protein	284.343	0.191471	0.119897	1.59696	0.110274	0.168389
RS03365	hypothetical_protein	236.272	0.059574	0.123696	0.481614	0.63008	0.71253
RS03370	hypothetical_protein	11.7086	-1.18269	0.368646	-3.20821	0.00133566	0.00302433
RS03375	hypothetical_protein	25.0318	-1.18726	0.312654	-3.79736	0.000146245	0.000382829
RS03380	peptidase_S8	75.6459	-1.00585	0.203827	-4.93482	8.02264e-07	2.80509e-06
RS03390	hypothetical_protein	112.888	-0.899226	0.17306	-5.19605	2.03569e-07	7.67359e-07
RS03395	peptidase_M13	11.5556	1.04458	0.363468	2.87393	0.00405401	0.00846296
RS03400	peptidase_M13	9.66483	0.625706	0.371629	1.68369	0.0922422	0.14442
RS03405	alpha/beta_hydrolase	13.4615	0.730559	0.348015	2.09922	0.0357978	0.0615499
RS03420	alpha/beta_hydrolase	16.7377	0.391554	0.330253	1.18562	0.235772	0.322233
RS03425	ABC_transporter_permease	22.2544	0.536705	0.303272	1.76972	0.0767742	0.122533
RS03430	permease	30.0864	0.688372	0.279813	2.46012	0.0138892	0.0260044
RS03440	hypothetical_protein	9.38667	0.589919	0.372151	1.58516	0.11293	0.172046
RS03445	multidrug_ABC_transporter_ATP-binding_protein	25.3867	0.624977	0.301094	2.07568	0.0379231	0.0648099
RS03450	hypothetical_protein	1005.49	0.429942	0.0766209	5.61128	2.00833e-08	8.51068e-08
RS03455	DNA-entry_nuclease	108.149	-0.103846	0.175021	-0.593333	0.552958	0.648188
RS03460	cytochrome_o_ubiquinol_oxidase	1394.71	0.165266	0.0760175	2.17405	0.0297013	0.051742
RS03465	ABC_transporter_ATP-binding_protein	1230.45	0.611773	0.121746	5.02498	5.03487e-07	1.80508e-06
RS03470	iron_export_ABC_transporter_permease_subunit_FetB	3332.44	0.51931	0.11081	4.68648	2.77949e-06	9.15243e-06
RS03475	phosphate_ABC_transporter_ATPase	182.583	0.470208	0.138877	3.38578	0.000709759	0.00167216
RS03480	LysR_family_transcriptional_regulator	736.259	-0.00118634	0.0879045	-0.0134957	0.989232	0.992744
RS03485	membrane_protein	95.8129	0.0322308	0.177346	0.18174	0.855787	0.88903
RS03490	lactate_dehydrogenase	121.35	0.19123	0.159243	1.20087	0.229802	0.316058
RS03495	glucuronide_permease	8.4146	0.564447	0.377441	1.49546	0.134795	0.200873
RS03500	2-dehydro-3-deoxygluconokinase	37.1785	0.185246	0.25808	0.717788	0.472888	0.573268
RS03505	beta-glucuronidase	136.414	0.397155	0.162357	2.44618	0.0144378	0.0269551
RS03510	GntR_family_transcriptional_regulator	1352.28	0.614376	0.0822829	7.46663	8.22775e-14	5.71323e-13
RS03515	2-dehydro-3-deoxyphosphooctonate_aldolase	25.6703	0.106929	0.297236	0.359745	0.719038	0.780568
RS03520	uronate_isomerase	59.6162	0.373807	0.232272	1.60935	0.10754	0.164851
RS03525	mannonate_dehydratase	42.3754	0.349749	0.253549	1.37941	0.167767	0.241991
RS03530	dioxygenase	49.3525	0.200353	0.23268	0.86107	0.3892	0.489032
RS03535	haloacid_dehalogenase	41.9921	0.0845338	0.246489	0.342951	0.731635	0.790341
RS03540	beta-hexosamidase	128.786	0.163509	0.158745	1.03001	0.303005	0.398668
RS03545	dipeptidase	2851.83	0.849699	0.078909	10.7681	4.86974e-27	7.70977e-26
RS03550	catabolite_control_protein_A	2861.14	-0.453083	0.0807998	-5.60748	2.05298e-08	8.66281e-08
RS03555	alpha-amylase	901.691	0.178824	0.0832035	2.14924	0.0316155	0.0546915
RS03560	glycosyl_transferase_family_1	2150.6	0.142416	0.065922	2.16037	0.0307437	0.0532765
RS03565	12C2-diacylglycerol_3-glucosyltransferase	3410.85	0.0210827	0.0606247	0.347757	0.728022	0.788234
RS03570	threonine--tRNA_ligase	4343.65	-0.137094	0.0587724	-2.33263	0.0196676	0.0355453
RS03575	DNA-binding_response_regulator	35.7041	-0.285347	0.267416	-1.06705	0.285947	0.380558
RS03580	hypothetical_protein	618.378	0.768887	0.0924899	8.3132	9.31539e-17	8.22998e-16
RS03585	peptidase	5664.81	0.323317	0.0670813	4.81977	1.43721e-06	4.89541e-06
RS03590	glutamine_ABC_transporter_permease	3289.17	0.293285	0.0787504	3.72424	0.000195908	0.00050026
RS03595	glutamine_ABC_transporter_permease	2071.1	0.413911	0.0774289	5.34569	9.00741e-08	3.54387e-07
RS03600	amino_acid_ABC_transporter_substrate-binding_protein	2333.47	0.482233	0.0747208	6.4538	1.09081e-10	5.69581e-10
RS03605	arginine_ABC_transporter_ATP-binding_protein	2182.6	0.540469	0.072086	7.49755	6.50211e-14	4.56681e-13
RS03610	DNA-binding_response_regulator	1037.95	0.303946	0.0776666	3.91347	9.09785e-05	0.000244961
RS03615	cell_wall_metabolism_sensor_histidine_kinase_VicK	1973.05	0.154391	0.0650802	2.37232	0.0176768	0.0322798
RS03620	metallo-hydrolase	1362.16	-0.00157712	0.0701144	-0.0224935	0.982054	0.987042
RS03625	hypothetical_protein	1006	-0.143983	0.0874732	-1.64603	0.0997581	0.154356
RS03630	ribonuclease_3	1102.16	0.142772	0.0828666	1.72292	0.0849038	0.134098
RS03635	chromosome_segregation_protein_SMC	4008.47	-0.439846	0.0616314	-7.13672	9.55864e-13	6.02438e-12
RS03640	haloacid_dehalogenase	765.169	0.181119	0.0874498	2.07112	0.0383476	0.0653097
RS03645	haloacid_dehalogenase	997.333	-0.0178444	0.0826321	-0.21595	0.829027	0.867607
RS03650	signal_recognition_particle-docking_protein_FtsY	1986.32	0.0152684	0.0691105	0.220927	0.82515	0.864879
RS03655	group_II_intron_reverse_transcriptase/maturase	210.729	0.506005	0.132141	3.82929	0.000128514	0.000338204
RS03660	phosphate_ABC_transporter_substrate-binding_protein	4107.69	0.694846	0.0600159	11.5777	5.34537e-31	1.11352e-29
RS03665	ABC_transporter_permease	4139.66	1.04567	0.0707841	14.7727	2.19886e-49	9.67011e-48
RS03670	hypothetical_protein	729.804	1.12682	0.0907397	12.4182	2.0818e-35	5.3505e-34
RS03675	N52CN10-methylene_tetrahydromethanopterin_reductase	123.393	-0.0901877	0.168244	-0.536054	0.591922	0.682641
RS03680	S1_RNA-binding_protein	1996.39	-0.421147	0.0724919	-5.80957	6.26321e-09	2.76672e-08
RS03685	SprT_family_protein	498.742	-0.401277	0.0964154	-4.16196	3.15528e-05	9.03662e-05
RS03690	phage_shock_protein_C	6658.5	0.886486	0.0664396	13.3427	1.30563e-40	4.03727e-39
RS03695	HPr_kinase/phosphorylase	3355.31	0.0787331	0.0581319	1.35439	0.175613	0.250846
RS03700	prolipoprotein_diacylglyceryl_transferase	2615.84	-0.0439251	0.0654175	-0.671457	0.501929	0.599468
RS03705	DUF948_domain_containing_protein	1999.06	0.0240916	0.0661556	0.364166	0.715734	0.77869
RS03710	hypothetical_protein	4654.93	0.278184	0.0780153	3.56576	0.000362798	0.000889687
RS03715	hypothetical_protein	7591.48	-0.432194	0.0692996	-6.23659	4.47204e-10	2.21809e-09
RS03720	peptidase_U32	295.286	-0.423149	0.140298	-3.01607	0.00256073	0.00552637
RS03725	collagenase-like_protease	671.581	-0.518257	0.13364	-3.878	0.000105317	0.000280305
RS03730	hypothetical_protein	611.814	0.28686	0.102406	2.8012	0.00509123	0.0104302
RS03735	hypothetical_protein	248.716	0.584855	0.122371	4.77936	1.75853e-06	5.92868e-06
RS03740	manganese_transporter	2239.65	0.398695	0.079713	5.00163	5.68484e-07	2.02708e-06
RS03745	bifunctional_diaminohydroxyphosphoribosylaminopyrimidine_deaminase/5-amino-6-(5-phosphoribosylamino)uracil_reductase	340.97	0.785318	0.155481	5.05091	4.39721e-07	1.58797e-06
RS03750	riboflavin_synthase	137.588	0.71809	0.191523	3.74937	0.000177279	0.000456816
RS03755	bifunctional_32C4-dihydroxy-2-butanone-4-phosphate_synthase/GTP_cyclohydrolase_II	401.559	0.674108	0.145611	4.6295	3.66542e-06	1.18721e-05
RS03760	62C7-dimethyl-8-ribityllumazine_synthase	249.425	0.785784	0.138138	5.68838	1.28252e-08	5.52562e-08
RS03765	lysine--tRNA_ligase	3858.11	-0.452667	0.0641345	-7.05808	1.68816e-12	1.04077e-11
RS03770	haloacid_dehalogenase	870.937	-0.364154	0.0867254	-4.19893	2.68181e-05	7.79339e-05
RS03775	histidine_phosphatase_family_protein	406.612	0.0401537	0.106536	0.376903	0.706246	0.771336
RS03780	aminoacyl-tRNA_deacylase	221.815	-0.120262	0.137647	-0.873705	0.382279	0.48156
RS03785	epimerase	199.901	-0.0757641	0.152743	-0.496023	0.619878	0.705428
RS03790	N-acetylmuramoyl-L-alanine_amidase	1541.03	-0.265659	0.0771295	-3.44432	0.000572501	0.00136668
RS03795	ECF_transporter_S_component	817.194	0.356856	0.0841402	4.24121	2.2232e-05	6.55694e-05
RS03800	hypothetical_protein	2263.75	0.303462	0.0835145	3.63364	0.000279448	0.000698268
RS03805	oligoendopeptidase_F	2504.39	0.556083	0.0739145	7.52333	5.33994e-14	3.80135e-13
RS03810	phosphoenolpyruvate_carboxylase	4875.02	-0.347878	0.0672482	-5.17304	2.30314e-07	8.6488e-07
RS03815	cell_division_protein	1544.19	-0.0556666	0.079397	-0.701118	0.48323	0.583117
RS03820	elongation_factor_Tu	113501	0.00295531	0.0550999	0.0536355	0.957226	0.968481
RS03825	triose-phosphate_isomerase	18322.7	-0.0742379	0.0508455	-1.46007	0.144272	0.212752
RS03830	22C3-bisphosphoglycerate-dependent_phosphoglycerate_mutase	32854.8	-0.164663	0.0693172	-2.3755	0.0175254	0.0321059
RS03835	penicillin-binding_protein_2B	4118.54	0.587443	0.0590707	9.94474	2.65876e-23	3.43902e-22
RS03840	recombination_protein_RecR	1817.89	0.20313	0.0730926	2.77908	0.00545132	0.0110617
RS03845	D-alanine--D-alanine_ligase	4059.05	-0.300977	0.0588954	-5.11037	3.21532e-07	1.1916e-06
RS03850	UDP-N-acetylmuramoyl-tripeptide--D-alanyl-D-alanine_ligase	2552.89	0.342084	0.0637001	5.37023	7.86384e-08	3.11251e-07
RS03855	MFS_transporter	262.538	-0.648811	0.127562	-5.08624	3.65224e-07	1.34595e-06
RS03860	membrane_protein	199.65	-0.679203	0.134084	-5.06549	4.07341e-07	1.48458e-06
RS03865	cell_surface_protein	98.6836	-0.118603	0.177796	-0.667076	0.504724	0.602079
RS03870	peptide_chain_release_factor_3	1862.95	-0.543137	0.0756349	-7.18104	6.91826e-13	4.44521e-12
RS03875	helicase	626.751	0.369936	0.0900835	4.10659	4.01535e-05	0.000112875
RS03880	ABC_transporter_ATP-binding_protein	192.168	-0.64336	0.165489	-3.88762	0.000101233	0.000270731
RS03885	ABC_transporter_permease	219.179	-1.04625	0.142997	-7.3166	2.54324e-13	1.70036e-12
RS03890	hypothetical_protein	393.155	-0.630678	0.131822	-4.78431	1.71579e-06	5.79446e-06
RS03895	RNA_helicase	10087	-0.299517	0.0570686	-5.24837	1.53448e-07	5.88516e-07
RS03900	hypothetical_protein	222.864	-0.396712	0.126438	-3.13759	0.00170342	0.00375398
RS03905	methyltransferase	249.711	-0.11941	0.125413	-0.952131	0.34103	0.440247
RS03910	1-acyl-sn-glycerol-3-phosphate_acyltransferase	1685.45	-0.00997529	0.0705235	-0.141446	0.887517	0.913363
RS03915	competence_protein_CelA	2.38648	0.1551	0.362915	0.427373	0.669107	NA
RS03920	DNA_internalization-related_competence_protein_ComEC/Rec2	35.6212	0.181822	0.259216	0.701431	0.483034	0.583117
RS03925	haloacid_dehalogenase	244.294	0.355674	0.127665	2.786	0.00533622	0.0108721
RS03930	LacI_family_transcriptional_regulator	483.113	0.378181	0.0951773	3.97343	7.08441e-05	0.00019338
RS03935	hypothetical_protein	1080.14	0.549346	0.0865275	6.3488	2.16997e-10	1.10112e-09
RS03940	methyltransferase	137.757	-0.0224217	0.155671	-0.144033	0.885474	0.912209
RS03945	DNA_polymerase_III_subunit_delta	855.963	-0.1092	0.0860906	-1.26844	0.204642	0.286008
RS03950	superoxide_dismutase_[Mn/Fe]	9230.51	0.314154	0.0825505	3.8056	0.000141461	0.000370797
RS03955	transcription_antiterminator_BglG	24.398	-0.181748	0.300728	-0.604362	0.545603	0.641409
RS03960	PTS_beta-glucoside_transporter_subunit_EIIBCA	32.4114	-0.645664	0.276154	-2.33806	0.0193842	0.0350653
RS03965	6-phospho-beta-glucosidase	153.75	0.0487241	0.153043	0.318368	0.750206	0.805129
RS03970	PucR_family_transcriptional_regulator	419.541	0.431041	0.10655	4.04543	5.22282e-05	0.000144761
RS03975	glycerate_kinase	29.8755	-0.829094	0.284081	-2.91851	0.00351711	0.00740465
RS03980	gluconate_proton_symporter	50.5149	-0.339154	0.264595	-1.28178	0.199918	0.280396
RS03985	hypothetical_protein	508.515	0.0825698	0.0952806	0.866596	0.386163	0.485705
RS03995	tRNA_preQ1(34)_S-adenosylmethionine_ribosyltransferase-isomerase_QueA	1410.64	-0.229291	0.0949681	-2.4144	0.0157612	0.0291509
RS04000	membrane_protein	1236.85	0.79958	0.287022	2.78578	0.0053399	0.0108721
RS04005	glucosamine-6-phosphate_deaminase	1690.34	0.281841	0.100815	2.79562	0.0051801	0.0105794
RS04010	glutathione-dependent_reductase	536.111	0.887107	0.0959841	9.24223	2.41421e-20	2.63963e-19
RS04015	16S_rRNA_pseudouridine(516)_synthase	135.971	-0.115529	0.15916	-0.725863	0.467923	0.568808
RS04020	MFS_transporter	4477.11	-0.545622	0.0974062	-5.60152	2.12485e-08	8.92796e-08
RS04025	competence_protein_CoiA	58.4392	0.746564	0.219914	3.3948	0.0006868	0.00162581
RS04030	oligoendopeptidase_F	2272.98	0.249188	0.0763205	3.26502	0.00109457	0.00250887
RS04035	haloacid_dehalogenase	265.731	0.190267	0.12606	1.50934	0.131212	0.196035
RS04040	O-methyltransferase	1107.64	0.0408936	0.0937984	0.435974	0.662856	0.739871
RS04045	foldase	5000.55	0.360512	0.0645192	5.58767	2.30141e-08	9.62896e-08
RS04050	hypothetical_protein	719.66	-0.192553	0.0895133	-2.15111	0.0314675	0.0544831
RS04055	alanine--tRNA_ligase	4504.88	-0.378993	0.0573069	-6.61338	3.75631e-11	2.03107e-10
RS04060	membrane_protein	607.107	-0.269047	0.0961036	-2.79956	0.00511728	0.0104727
RS04065	glycosyl_transferase	214.002	0.786026	0.134913	5.82616	5.67161e-09	2.51662e-08
RS04070	hypothetical_protein	2.53917	0.109901	0.366726	0.299681	0.764421	0.81557
RS04075	hypothetical_protein	7.36934	0.190225	0.385544	0.493394	0.621734	0.707133
RS04080	transcriptional_regulator	4.48349	-0.0756035	0.388986	-0.19436	0.845894	0.881529
RS04085	membrane_protein	30.2202	0.222362	0.276392	0.804518	0.421098	0.523134
RS04090	energy-coupled_thiamine_transporter_ThiT	532.991	-0.429771	0.101118	-4.25018	2.13595e-05	6.30904e-05
RS04095	ribonucleoside-diphosphate_reductase	10691.1	0.429119	0.0525281	8.16933	3.10097e-16	2.56771e-15
RS04100	ribonucleoside-diphosphate_reductase_subunit_alpha	23728	0.650318	0.056955	11.4181	3.39595e-30	6.78848e-29
RS04105	NrdH-redoxin	3402.18	0.757763	0.0679694	11.1486	7.27506e-29	1.30885e-27
RS04110	phosphocarrier_protein_HPr	13372.4	-0.366948	0.0528882	-6.93818	3.97182e-12	2.35337e-11
RS04115	phosphoenolpyruvate--protein_phosphotransferase	34907.6	-0.382667	0.0643142	-5.94996	2.68207e-09	1.23151e-08
RS04120	NADP-dependent_glyceraldehyde-3-phosphate_dehydrogenase	10339.5	-0.0296198	0.0769144	-0.3851	0.700163	0.767658
RS04125	polysaccharide_deacetylase	696.418	-0.407384	0.0980493	-4.15489	3.25444e-05	9.28031e-05
RS04130	RNA_helicase	1968.56	0.0842467	0.069144	1.21842	0.223063	0.308485
RS04135	uridine_kinase	1116	-0.451336	0.0858557	-5.25692	1.4649e-07	5.65114e-07
RS04140	hypothetical_protein	944.734	0.287665	0.0821556	3.50146	0.000462716	0.00112083
RS04145	DNA_polymerase_III_subunit_gamma/tau	3459.24	-0.19859	0.0637061	-3.11729	0.00182522	0.00401346
RS04150	membrane_protein	176.723	0.122233	0.136094	0.898156	0.369103	0.469443
RS04155	bifunctional_biotin--[acetyl-CoA-carboxylase]_synthetase/biotin_operon_repressor	540.367	0.502013	0.102304	4.90707	9.24491e-07	3.20977e-06
RS04160	S-adenosylmethionine_synthase	2345.62	-0.142895	0.0652455	-2.19012	0.0285158	0.0498964
RS04165	hypothetical_protein	140.632	0.0179506	0.152651	0.117592	0.906391	0.92748
RS04170	hypothetical_protein	34.5007	0.546142	0.279758	1.95219	0.0509157	0.0843197
RS04175	hypothetical_protein	21.4707	0.113776	0.325036	0.350042	0.726307	0.787165
RS04180	hypothetical_protein	13.7704	-0.427522	0.347513	-1.23023	0.21861	0.303386
RS04185	ABC_transporter_permease	11.3963	0.214892	0.362944	0.59208	0.553797	0.648188
RS04190	ABC_transporter_ATP-binding_protein	22.7882	-0.232992	0.310832	-0.749575	0.453511	0.554866
RS04195	ABC_transporter	16.4857	-0.415584	0.357796	-1.16151	0.245434	0.334522
RS04200	thiaminase_II	14.6233	-0.0686707	0.357977	-0.19183	0.847876	0.882665
RS04205	bifunctional_hydroxymethylpyrimidine_kinase/phosphomethylpyrimidine_kinase	21.8414	-0.518113	0.314451	-1.64768	0.0994186	0.153951
RS04210	hydroxyethylthiazole_kinase	16.6307	-0.558058	0.336087	-1.66046	0.096822	0.150401
RS04215	thiamine_phosphate_synthase	22.8202	-0.177398	0.305116	-0.581413	0.560962	0.655339
RS04220	UDP-N-acetylglucosamine_1-carboxyvinyltransferase	2879.64	-0.314514	0.0627179	-5.01474	5.3105e-07	1.90045e-06
RS04225	RimJ/RimL_family_protein_N-acetyltransferase	380.012	0.138616	0.107577	1.28852	0.197564	0.277881
RS04230	hypothetical_protein	999.247	-0.0758388	0.078894	-0.961275	0.336414	0.435709
RS04235	methionine_aminopeptidase	1172.13	-0.151021	0.0764257	-1.97605	0.0481489	0.0802012
RS04240	hypothetical_protein	1566.75	-0.351788	0.0713438	-4.93088	8.18583e-07	2.8571e-06
RS04245	sugar_translocase	111.105	0.0351375	0.181689	0.193394	0.846651	0.881853
RS04250	queuosine_transporter_QueT	5410.39	0.26021	0.0660782	3.93792	8.21922e-05	0.000223125
RS04255	DNA_ligase_(NAD(+))_LigA	1540.4	-0.163642	0.0698705	-2.34207	0.0191772	0.0347542
RS04260	diacylglycerol_kinase	781.693	-0.335201	0.0863671	-3.88112	0.000103978	0.000277322
RS04265	type_I_pullulanase	2707.09	-0.412195	0.0616743	-6.68341	2.3344e-11	1.29405e-10
RS04270	glycogen-branching_enzyme	413.796	-0.303686	0.115017	-2.64035	0.00828202	0.0162762
RS04275	glucose-1-phosphate_adenylyltransferase	234.119	-0.234101	0.126378	-1.85239	0.0639699	0.103683
RS04280	glucose-1-phosphate_adenylyltransferase_subunit_GlgD	219.849	-0.00324695	0.137803	-0.0235623	0.981202	0.986686
RS04285	starch_synthase	322.309	-0.198891	0.121578	-1.63591	0.101859	0.157237
RS04290	F0F1_ATP_synthase_subunit_C	6960.96	0.374193	0.0591071	6.33077	2.43946e-10	1.23155e-09
RS04295	ATP_synthase_subunit_A	14932.6	0.264124	0.0520827	5.07125	3.95209e-07	1.44837e-06
RS04300	ATP_synthase_subunit_B	7388.57	0.285074	0.0645961	4.41318	1.01864e-05	3.14003e-05
RS04305	F0F1_ATP_synthase_subunit_delta	10307.3	0.240235	0.0636898	3.77195	0.000161976	0.000420671
RS04310	ATP_synthase_subunit_alpha	29496.5	0.234099	0.0512687	4.56613	4.96822e-06	1.58327e-05
RS04315	ATP_synthase_subunit_gamma	18010.9	0.192346	0.0542411	3.54613	0.000390934	0.000955135
RS04320	ATP_synthase_subunit_beta	29314.3	0.198938	0.0537278	3.70271	0.000213309	0.000541898
RS04325	F0F1_ATP_synthase_subunit_epsilon	15490.8	0.062236	0.0665763	0.934807	0.349888	0.449337
RS04330	membrane_protein	196.15	0.416873	0.142162	2.93238	0.00336379	0.00710452
RS04335	UDP-N-acetylglucosamine_1-carboxyvinyltransferase	3180.21	0.187271	0.0630915	2.96824	0.0029951	0.00638719
RS04340	DNA-directed_RNA_polymerase_subunit_beta	1252.8	0.0466131	0.0932317	0.499971	0.617096	0.704058
RS04345	DNA-entry_nuclease	918.4	0.118484	0.0823177	1.43935	0.150052	0.219803
RS04350	phenylalanine--tRNA_ligase_subunit_alpha	1367.68	-0.143795	0.0741824	-1.9384	0.052575	0.0864886
RS04355	GNAT_family_N-acetyltransferase	897.276	-0.149141	0.0784314	-1.90155	0.0572305	0.0938352
RS04360	phenylalanine--tRNA_ligase_subunit_beta	3376.53	-0.220405	0.0649057	-3.39577	0.000684357	0.00162197
RS04365	hypothetical_protein	665.576	1.12437	0.112442	9.99961	1.52996e-23	2.01853e-22
RS04370	ATP-dependent_nuclease_subunit_B	1215.82	-0.244669	0.0741439	-3.29992	0.000967132	0.00223854
RS04375	helicase-exonuclease_AddAB_subunit_AddA	2389.84	-0.231174	0.0630105	-3.66881	0.00024368	0.000615105
RS04380	magnesium_transporter	1192.28	-0.354436	0.0742396	-4.77421	1.80412e-06	6.06172e-06
RS04385	tRNA_uridine-5-carboxymethylaminomethyl(34)_synthesis_GTPase_MnmE	1411.97	0.042719	0.0722275	0.591451	0.554218	0.648222
RS04390	multidrug_ABC_transporter_ATP-binding_protein	1261.38	0.0375939	0.0718008	0.523587	0.600566	0.689797
RS04395	pyruvate_dehydrogenase_E1_subunit_alpha	13785.2	-0.234606	0.0861504	-2.72322	0.00646492	0.0129495
RS04400	pyruvate_dehydrogenase_subunit_beta	8830.58	-0.235203	0.0780268	-3.01439	0.00257493	0.00555097
RS04405	branched-chain_alpha-keto_acid_dehydrogenase_subunit_E2	7869.07	-0.0394053	0.0757224	-0.520392	0.602791	0.691149
RS04410	dihydrolipoyl_dehydrogenase	16460	-0.0694576	0.0658862	-1.05421	0.291788	0.387417
RS04415	lipoate--protein_ligase_A	1244.79	-0.491988	0.0777523	-6.32764	2.48945e-10	1.25041e-09
RS04420	group_II_intron_reverse_transcriptase/maturase	223.013	0.739753	0.138224	5.35184	8.70645e-08	3.43228e-07
RS04425	glutamine_amidotransferase	1196.02	-0.253657	0.0764278	-3.31891	0.000903702	0.00210403
RS04430	UDP-N-acetylmuramyl_peptide_synthase	1937.23	0.146966	0.0651844	2.25462	0.0241569	0.0426844
RS04435	membrane_protein	1465.42	0.126943	0.0701536	1.8095	0.0703733	0.113319
RS04440	hypothetical_protein	1303.54	-0.0132466	0.078689	-0.168342	0.866315	0.896672
RS04445	phosphoglucosamine_mutase	4046.79	-0.153989	0.0591884	-2.60168	0.00927685	0.0179813
RS04450	hypothetical_protein	119.721	0.439506	0.169134	2.59857	0.00936133	0.0181096
RS04455	hypothetical_protein	260.105	0.91179	0.121513	7.50364	6.20706e-14	4.38706e-13
RS04460	coproporphyrinogen_III_oxidase	1180.06	-0.0774028	0.0774948	-0.998813	0.317885	0.414423
RS04465	acyl-ACP_thioesterase	500.224	-0.521795	0.0980329	-5.32265	1.02264e-07	3.99174e-07
RS04470	haloacid_dehalogenase	687.639	-0.245546	0.104633	-2.34673	0.0189392	0.0343859
RS04475	membrane_protein	1040.56	-0.403114	0.0922454	-4.37002	1.24237e-05	3.77093e-05
RS04480	type_II_CRISPR_RNA-guided_endonuclease_Cas9	615.118	-0.984156	0.100097	-9.83199	8.19788e-23	1.02035e-21
RS04485	subtype_II_CRISPR-associated_endonuclease_Cas1	176.155	-0.90208	0.147947	-6.09731	1.07866e-09	5.1191e-09
RS04490	CRISPR-associated_endonuclease_Cas2	51.7226	-0.854928	0.242432	-3.52646	0.000421153	0.00102517
RS04495	type_II-A_CRISPR-associated_protein_Csn2	242.966	-0.691898	0.124177	-5.57188	2.52002e-08	1.05214e-07
RS04505	nucleoside-diphosphate_kinase	8223.99	1.18175	0.0704881	16.7652	4.3829e-63	2.99095e-61
RS04510	elongation_factor_4	4560.74	0.112212	0.0571917	1.96204	0.0497578	0.0825405
RS04515	hypothetical_protein	122.922	-0.661836	0.168986	-3.91651	8.98398e-05	0.000242388
RS04520	phosphohydrolase	486.124	0.584834	0.0977458	5.98321	2.18787e-09	1.00693e-08
RS04525	N-acetyltransferase	478.386	0.393917	0.0935516	4.21069	2.54594e-05	7.43128e-05
RS04530	peptide-methionine_(R)-S-oxide_reductase	721.229	0.389493	0.0951544	4.09327	4.25334e-05	0.000118721
RS04535	haloacid_dehalogenase	1427.67	0.701821	0.0829446	8.46132	2.64366e-17	2.45624e-16
RS04540	hypothetical_protein	428.221	0.251691	0.105521	2.38521	0.0170694	0.0313071
RS04545	hypothetical_protein	643.52	0.496763	0.0923853	5.37709	7.57009e-08	3.00224e-07
RS04550	TVP38/TMEM64_family_protein	704.785	0.191003	0.0910076	2.09876	0.0358376	0.0615648
RS04555	hypothetical_protein	4835.74	0.238133	0.0873542	2.72607	0.0064094	0.0128513
RS04560	multidrug_ABC_transporter_ATP-binding_protein	2509.65	0.248793	0.0719605	3.45735	0.000545512	0.00131016
RS04565	GntR_family_transcriptional_regulator	1514.18	0.265619	0.0809339	3.28192	0.00103101	0.00238084
RS04570	DNA_polymerase_III_subunit_alpha	961.055	0.233085	0.0772419	3.0176	0.00254785	0.00550457
RS04575	6-phosphofructokinase	10794.4	-0.308524	0.0591971	-5.21181	1.8701e-07	7.08991e-07
RS04580	pyruvate_kinase	25795.4	-0.34386	0.0554012	-6.20673	5.40992e-10	2.65006e-09
RS04585	signal_peptidase_I	1414.72	0.0590271	0.0735877	0.802133	0.422476	0.524517
RS04590	glutamine--fructose-6-phosphate_aminotransferase	14336.3	2.23218	0.214547	10.4041	2.37392e-25	3.45441e-24
RS04595	hypothetical_protein	351.23	-1.25645	0.112711	-11.1475	7.36172e-29	1.31251e-27
RS04600	amino_acid_ABC_transporter_permease	438.482	0.41835	0.0986801	4.23946	2.24063e-05	6.59851e-05
RS04605	amino_acid_ABC_transporter_ATP-binding_protein	625.201	0.224198	0.0949779	2.36053	0.0182488	0.0331933
RS04610	glutamine_ABC_transporter_substrate-binding_protein	1252.75	0.309455	0.0796521	3.88508	0.000102295	0.0002732
RS04615	30S_ribosomal_protein_S20	17127.6	0.225239	0.0902896	2.49463	0.0126089	0.0238402
RS04620	type_I_pantothenate_kinase	473.419	0.210514	0.106834	1.97048	0.0487835	0.0811281
RS04625	methyltransferase	386.988	-0.740227	0.104093	-7.11118	1.15056e-12	7.18284e-12
RS04630	cytidine_deaminase	330.393	-0.553077	0.113834	-4.85863	1.18202e-06	4.04011e-06
RS04635	BMP_family_ABC_transporter_substrate-binding_protein	3413.27	-0.151343	0.075266	-2.01077	0.0443498	0.0745695
RS04640	sugar_ABC_transporter_ATP-binding_protein	1324.05	-1.19562	0.0817061	-14.6332	1.726e-48	6.97092e-47
RS04645	ABC_transporter_permease	1575.89	-1.38158	0.0791489	-17.4555	3.12574e-68	2.81174e-66
RS04650	ABC_transporter_permease	2569.08	-1.35918	0.0890254	-15.2673	1.26318e-52	6.24957e-51
RS04655	NADH_oxidase	2979.3	-0.872738	0.101988	-8.55723	1.15613e-17	1.1e-16
RS04660	L-lactate_dehydrogenase	27218	-0.111695	0.0666076	-1.67691	0.093561	0.146138
RS04665	DNA_gyrase_subunit_A	3522.33	-0.398132	0.0608978	-6.53771	6.24666e-11	3.34112e-10
RS04670	class_A_sortase	1500.67	-0.430318	0.0691272	-6.22502	4.81509e-10	2.37041e-09
RS04675	glyoxalase	998.207	-0.495007	0.0867628	-5.70529	1.16145e-08	5.01859e-08
RS04680	hypothetical_protein	4581.12	2.05581	0.0696644	29.5101	2.13504e-191	8.45048e-189
RS04685	sodium_proton_antiporter	1091.69	-0.736294	0.0900237	-8.17889	2.86479e-16	2.40229e-15
RS04690	hypothetical_protein	0.261641	-0.109635	0.154617	-0.709074	0.478278	NA
RS04695	hypothetical_protein	1.59619	-0.141897	0.33318	-0.425888	0.670189	NA
RS04700	hypothetical_protein	1.85735	0.168518	0.34498	0.488488	0.625204	NA
RS04705	cell_division_protein_FtsK	1.40775	0.196901	0.323293	0.609048	0.542492	NA
RS04710	Cro/Cl_family_transcriptional_regulator	2.24324	0.248208	0.357857	0.693596	0.487936	NA
RS04715	hypothetical_protein	0.691915	0.249747	0.246295	1.01402	0.310576	NA
RS04720	hypothetical_protein	0.529727	-0.070302	0.22618	-0.310824	0.755935	NA
RS04725	hypothetical_protein	102.36	0.34483	0.170912	2.01759	0.0436338	0.0734904
RS04730	antirestriction_protein_ArdA	2.26832	0.0692605	0.358399	0.19325	0.846763	NA
RS04735	hypothetical_protein	88.778	0.168761	0.182098	0.926763	0.35405	0.454092
RS04740	conjugal_transfer_protein	3.34827	0.169467	0.381219	0.44454	0.656652	0.73502
RS04745	ATP/GTP-binding_protein	4.95916	-0.0513667	0.387151	-0.132679	0.894447	0.917156
RS04750	hypothetical_protein	3.3067	-0.5664	0.379663	-1.49185	0.135739	0.201624
RS04755	peptidase_P60	1.32708	-0.163599	0.310839	-0.526314	0.59867	NA
RS04760	conjugal_transfer_protein	2.21765	0.304945	0.355757	0.857173	0.391349	NA
RS04765	tetracycline_resistance_ribosomal_protection_protein_Tet(M)	580.228	-0.538073	0.0990476	-5.43247	5.55793e-08	2.24932e-07
RS04770	transcriptional_regulator	40.6782	-1.49765	0.269319	-5.56087	2.68436e-08	1.11839e-07
RS04775	DNA-directed_RNA_polymerase_sigma-70_factor	0.363643	-0.190529	0.201169	-0.947113	0.343581	NA
RS04780	hypothetical_protein	1.4006	-0.24196	0.318847	-0.758861	0.447936	NA
RS04785	hypothetical_protein	118.297	0.323466	0.161621	2.00139	0.0453506	0.0760583
RS04790	site-specific_integrase	304.749	0.132188	0.133559	0.98974	0.322301	0.419352
RS04795	GMP_synthase_(glutamine-hydrolyzing)	5685.26	-0.205403	0.0630932	-3.25554	0.00113176	0.00258631
RS04800	GntR_family_transcriptional_regulator	626.502	0.302559	0.0962619	3.14308	0.00167182	0.00370081
RS04805	FADH(2)-oxidizing_methylenetetrahydrofolate--tRNA-(uracil(54)-C(5))-methyltransferase_TrmFO	3260.3	0.299759	0.0592448	5.05967	4.19988e-07	1.52226e-06
RS04810	N-acetyltransferase	395.866	0.492629	0.116909	4.21379	2.51122e-05	7.34078e-05
RS04815	O-sialoglycoprotein_endopeptidase	953.008	0.480283	0.0758858	6.32902	2.46728e-10	1.24243e-09
RS04825	peptidase_S41	31.8617	0.453058	0.268351	1.6883	0.0913529	0.143141
RS04830	ABC_transporter_ATP-binding_protein	169.337	0.406721	0.151091	2.6919	0.00710472	0.0141309
RS04835	ABC_transporter_permease	539.168	0.245644	0.0896317	2.74059	0.00613288	0.0123431
RS04840	DNA-binding_response_regulator	298.846	1.01878	0.120931	8.42442	3.62528e-17	3.35254e-16
RS04845	sensor_histidine_kinase	577.106	0.766804	0.0936938	8.18415	2.74226e-16	2.3192e-15
RS04850	tyrosine_recombinase_XerS	316.959	0.412954	0.121731	3.39236	0.000692927	0.0016364
RS04855	ABC_transporter_substrate-binding_protein	86.1351	0.0871916	0.192108	0.453867	0.649924	0.729138
RS04860	membrane_protein	281.362	0.143203	0.117803	1.21562	0.224131	0.309529
RS04865	DNA-binding_protein	146.754	0.0685172	0.163879	0.418096	0.675877	0.748914
RS04870	signal_recognition_particle_protein	3080.14	0.139324	0.0648553	2.14823	0.0316956	0.0547822
RS04875	DNA-binding_protein	464.064	0.167629	0.097806	1.7139	0.0865478	0.136477
RS04880	two-component_sensor_histidine_kinase	2477.97	0.935689	0.0685245	13.6548	1.88984e-42	6.56141e-41
RS04885	DNA-binding_response_regulator	621.121	5.61355	0.160487	34.9781	4.83571e-268	2.39247e-265
RS04890	aminopeptidase	12159.8	0.358208	0.0606623	5.90496	3.52732e-09	1.59374e-08
RS04895	phosphate_transport_system_regulatory_protein_PhoU	2072.12	-0.185007	0.0891529	-2.07516	0.0379713	0.0648363
RS04900	phosphate_ABC_transporter_ATP-binding_protein	1554.34	-0.287465	0.079011	-3.6383	0.000274448	0.00068751
RS04905	phosphate_ABC_transporter_ATP-binding_protein	1275.51	-0.35686	0.0819507	-4.35457	1.33325e-05	4.02212e-05
RS04910	phosphate_ABC_transporter2C_permease_protein_PstA	1230.61	-0.285549	0.0856623	-3.33342	0.000857844	0.00200434
RS04915	phosphate_ABC_transporter_permease_subunit_PstC	1351.07	-0.281095	0.0769668	-3.65216	0.000260043	0.00065474
RS04920	phosphate_ABC_transporter_substrate-binding_protein	880.76	-0.291128	0.0843287	-3.4523	0.000555828	0.00133009
RS04925	23S_rRNA_methyltransferase	455.94	-0.174269	0.0994676	-1.75202	0.079771	0.126903
RS04930	myo-inositol-1(or_4)-monophosphatase	2133.27	-0.465077	0.0653216	-7.11981	1.08075e-12	6.76838e-12
RS04935	hypothetical_protein	418.393	-0.259661	0.100475	-2.58433	0.00975679	0.0188011
RS04940	regulatory_protein_Spx	1319.31	0.0419349	0.0793474	0.528497	0.597154	0.687074
RS04945	bifunctional_riboflavin_kinase/FMN_adenylyltransferase	1385.27	-0.262017	0.0846099	-3.09677	0.00195645	0.00428298
RS04950	tRNA_pseudouridine(55)_synthase_TruB	1197.46	-0.054599	0.0832929	-0.655505	0.512143	0.609459
RS04955	N-acetyltransferase	470.281	-0.304036	0.105923	-2.87035	0.0041002	0.00855036
RS04960	hypothetical_protein	863.916	-0.183477	0.0885495	-2.07202	0.0382632	0.0652222
RS04965	type_I_restriction_endonuclease_subunit_S	395.216	0.0467999	0.111265	0.420617	0.674035	0.748266
RS04970	CPBP_family_intramembrane_metalloprotease	507.21	-0.448386	0.0998281	-4.49158	7.06979e-06	2.21378e-05
RS04975	ABC_transporter_permease	615.274	-0.13703	0.0973038	-1.40827	0.15905	0.231271
RS04980	ABC_transporter_ATP-binding_protein	271.842	-0.210565	0.120403	-1.74884	0.0803183	0.127568
RS04985	DNA_topoisomerase_I	2781.54	-0.540001	0.0618942	-8.72457	2.672e-18	2.67065e-17
RS04990	DNA_processing_protein_DprA	8.72038	0.243174	0.375992	0.646754	0.517791	0.613966
RS04995	ferrichrome_ABC_transporter_substrate-binding_protein	621.596	0.488597	0.10474	4.66484	3.08851e-06	1.01195e-05
RS05000	iron_ABC_transporter_ATP-binding_protein	260.246	0.407552	0.12842	3.17359	0.00150567	0.00335554
RS05005	hypothetical_protein	369.103	0.480178	0.109705	4.37698	1.20332e-05	3.66366e-05
RS05010	iron_ABC_transporter_permease	397.185	0.430139	0.106404	4.0425	5.28842e-05	0.00014617
RS05015	galactoside_O-acetyltransferase	935.015	0.608247	0.0799155	7.61113	2.71708e-14	2.01389e-13
RS05020	ribonuclease_HII	1104.05	0.671867	0.0896729	7.49242	6.76172e-14	4.71177e-13
RS05025	ribosome_biogenesis_GTPase_YlqF	1041.73	0.673607	0.0746695	9.02118	1.86067e-19	1.96913e-18
RS05030	cell_surface_protein	1012.95	1.27924	0.10959	11.6729	1.7524e-31	3.72902e-30
RS05035	hypothetical_protein	486.247	0.279539	0.105898	2.63969	0.00829813	0.0162917
RS05040	DNA-binding_response_regulator	223.996	0.194821	0.142018	1.37181	0.170123	0.244162
RS05045	sensor_histidine_kinase	544.723	0.316582	0.0915625	3.45755	0.000545101	0.00131016
RS05055	hypothetical_protein	176.596	0.564279	0.136755	4.12622	3.68778e-05	0.000104259
RS05060	hypothetical_protein	277.277	0.517998	0.114683	4.51679	6.27831e-06	1.96906e-05
RS05065	hypothetical_protein	103.917	0.654926	0.179488	3.64887	0.000263398	0.000661503
RS05070	hypothetical_protein	114.822	0.656614	0.164448	3.99283	6.52892e-05	0.000178957
RS05080	hypothetical_protein	151.804	0.592279	0.159338	3.71712	0.000201509	0.0005139
RS05085	hypothetical_protein	303.25	0.147409	0.120822	1.22006	0.222444	0.307963
RS05090	hypothetical_protein	552.659	0.196858	0.0987087	1.99434	0.0461154	0.0770797
RS05095	type_VII_secretion_protein_EssC	1284.48	-0.151396	0.0814123	-1.85962	0.0629396	0.102096
RS05100	type_VII_secretion_protein_EssB	276.617	-0.384953	0.12705	-3.02994	0.00244599	0.00529607
RS05105	hypothetical_protein	41.2584	-0.224414	0.245201	-0.915225	0.360073	0.459732
RS05110	type_VII_secretion_protein_EssA	88.6303	-0.259012	0.188617	-1.37322	0.169685	0.244046
RS05115	ABC_transporter_permease	1019.43	-0.0156965	0.0870824	-0.180249	0.856957	0.889437
RS05120	hypothetical_protein	186.558	0.191942	0.142799	1.34414	0.178902	0.25471
RS05125	hypothetical_protein	82.5774	0.160415	0.189743	0.845432	0.39787	0.498345
RS05130	carbamoyl_phosphate_synthase_large_subunit	316.42	-1.04128	0.15961	-6.52392	6.84921e-11	3.62422e-10
RS05135	carbamoyl_phosphate_synthase_small_subunit	91.5143	-1.19744	0.228846	-5.23251	1.67225e-07	6.37648e-07
RS05140	aspartate_carbamoyltransferase	69.3345	-0.911481	0.255151	-3.57232	0.000353835	0.000870945
RS05145	dihydroorotase	305.92	-1.50789	0.154715	-9.74626	1.91383e-22	2.29544e-21
RS05150	orotate_phosphoribosyltransferase	105.967	-1.21315	0.201385	-6.02404	1.70114e-09	7.92131e-09
RS05155	orotidine-5'-phosphate_decarboxylase	107.658	-1.38514	0.2089	-6.63062	3.34282e-11	1.82244e-10
RS05160	membrane_protein	1205.42	-0.847154	0.0771291	-10.9836	4.58358e-28	8.02735e-27
RS05165	ABC_transporter_ATP-binding_protein	1178.13	-0.6835	0.0792296	-8.62682	6.30798e-18	6.11935e-17
RS05170	hypothetical_protein	2917.06	0.216969	0.0825784	2.62744	0.00860306	0.016807
RS05175	aspartate-semialdehyde_dehydrogenase	208.84	-0.0412153	0.136451	-0.302052	0.762612	0.814908
RS05180	fibronectin-binding_protein	9.28942	0.478703	0.373996	1.27997	0.200557	0.281092
RS05185	cardiolipin_synthase	1317.37	0.29181	0.0698072	4.18022	2.91225e-05	8.40648e-05
RS05190	formate--tetrahydrofolate_ligase	1750.42	-0.262328	0.0783084	-3.34993	0.000808314	0.00189757
RS05195	lipoate--protein_ligase_A	936.188	-0.354732	0.0905773	-3.91635	8.99004e-05	0.000242388
RS05200	deacetylase_SIR2	1110.84	-0.541762	0.0955846	-5.66787	1.4458e-08	6.16647e-08
RS05205	hypothetical_protein	1203.42	-0.357102	0.0854339	-4.17986	2.91685e-05	8.40648e-05
RS05210	glycine_cleavage_system_protein_H	958.625	-0.339956	0.0935049	-3.6357	0.000277228	0.000693596
RS05215	LLM_class_flavin-dependent_oxidoreductase	2107.02	-0.41923	0.085576	-4.89893	9.63611e-07	3.32808e-06
RS05220	NADH-dependent_flavin_oxidoreductase	2194.84	-0.465165	0.0945948	-4.91745	8.76767e-07	3.05479e-06
RS05225	hypothetical_protein	1190.42	-0.48216	0.097623	-4.939	7.8523e-07	2.76016e-06
RS05230	phosphopantothenate--cysteine_ligase	357.145	0.320833	0.106643	3.00847	0.0026257	0.00565426
RS05235	phosphopantothenoylcysteine_decarboxylase	330.592	0.263215	0.116605	2.25732	0.0239879	0.0424237
RS05240	membrane_protein	3019.68	-0.191331	0.0695669	-2.75032	0.0059537	0.0120228
RS05245	phosphoglucomutase	4560.22	0.234604	0.0797862	2.9404	0.00327786	0.00695273
RS05250	hypothetical_protein	257.018	0.161895	0.12197	1.32733	0.184399	0.261408
RS05255	sugar_ABC_transporter_ATP-binding_protein	1423.52	-0.0334209	0.0701605	-0.476349	0.633825	0.714724
RS05260	multidrug_ABC_transporter_ATP-binding_protein	1280.81	-0.0379998	0.0774739	-0.490485	0.62379	0.70842
RS05265	hypothetical_protein	804.178	-0.214632	0.083666	-2.56534	0.0103074	0.0197466
RS05270	hypothetical_protein	1673.8	-0.0805466	0.067277	-1.19724	0.231214	0.317538
RS05275	serine_hydroxymethyltransferase	1925.1	-0.102071	0.0713521	-1.43052	0.152567	0.222991
RS05280	threonylcarbamoyl-AMP_synthase	930.547	-0.24696	0.089175	-2.76939	0.00561617	0.0113644
RS05285	protein-(glutamine-N5)_methyltransferase2C_release_factor-specific	1055.67	-0.262281	0.0752598	-3.48501	0.000492112	0.00118912
RS05290	peptide_chain_release_factor_1	1482.16	-0.20616	0.072952	-2.82596	0.00471386	0.00973771
RS05295	thymidine_kinase	662.174	-0.0128207	0.0869094	-0.147518	0.882723	0.910323
RS05300	tautomerase	2140.07	0.04265	0.0711116	0.599761	0.548665	0.643633
RS05305	thiamine_biosynthesis_protein_ApbE	250.152	0.0805322	0.119483	0.674007	0.500307	0.598307
RS05310	NAD(P)H-dependent_oxidoreductase	240.117	-0.202071	0.141595	-1.42711	0.153548	0.223986
RS05315	NAD(P)H-dependent_oxidoreductase	789.938	-0.415193	0.100263	-4.14104	3.4573e-05	9.81636e-05
RS05320	formate_transporter	378.436	-0.615431	0.132031	-4.66126	3.14287e-06	1.02636e-05
RS05325	xanthine_permease	1024.93	-1.06979	0.0955831	-11.1922	4.45042e-29	8.2312e-28
RS05330	xanthine_phosphoribosyltransferase	179.201	-0.829559	0.153202	-5.4148	6.13586e-08	2.47309e-07
RS05335	guanosine_monophosphate_reductase	412.981	1.16988	0.13334	8.77367	1.72942e-18	1.75514e-17
RS05340	MFS_transporter	552.942	-0.0483322	0.0964522	-0.5011	0.616301	0.703785
RS05345	hypothetical_protein	1164.48	-0.189256	0.120991	-1.56421	0.117769	0.178457
RS05350	potassium_transporter_Kup	2711.4	0.241818	0.0809225	2.98826	0.00280571	0.00600919
RS05355	NAD(P)-dependent_oxidoreductase	465.6	0.678203	0.102341	6.62689	3.4284e-11	1.86395e-10
RS05365	phosphate_acetyltransferase	7669.02	-0.173624	0.0846139	-2.05196	0.040174	0.0680687
RS05370	23S_rRNA_pseudouridine_synthase	1031.18	-0.201338	0.0832578	-2.41825	0.0155954	0.0288711
RS05375	NAD(+)_kinase	842.699	-0.0997817	0.0841366	-1.18595	0.235642	0.322233
RS05380	GTP_pyrophosphokinase	970.666	-0.0427578	0.0823539	-0.519196	0.603624	0.691303
RS05385	adenylate_cyclase	566.538	0.807714	0.094237	8.5711	1.02505e-17	9.7999e-17
RS05390	ribose-phosphate_pyrophosphokinase_2	3343.07	0.18376	0.0612342	3.00093	0.00269154	0.00578345
RS05395	cysteine_desulfurase	2998.02	-0.0298099	0.0616025	-0.483908	0.628451	0.711282
RS05400	cysteine_desulfurase	2869.93	-0.173794	0.0646392	-2.68869	0.00717341	0.0142532
RS05405	transcriptional_regulator	3801.02	-0.566951	0.0850224	-6.66826	2.5886e-11	1.43096e-10
RS05410	hypothetical_protein	7.57072	1.31356	0.385894	3.40393	0.000664234	0.00157806
RS05415	AI-2E_family_transporter	1013.39	0.20589	0.0869093	2.36902	0.0178355	0.0325312
RS05420	6-phospho-beta-glucosidase	515.16	0.682671	0.0998859	6.8345	8.22905e-12	4.70673e-11
RS05425	hypothetical_protein	1016.05	0.130736	0.091618	1.42697	0.153587	0.223986
RS05430	hydrolase	626.9	0.550707	0.0895599	6.14904	7.79536e-10	3.75986e-09
RS05435	AraC_family_transcriptional_regulator	285.607	-0.11488	0.123368	-0.931201	0.35175	0.451435
RS05440	ribonuclease_HII	750.37	-0.375027	0.0904442	-4.1465	3.37599e-05	9.59926e-05
RS05445	spermidine/putrescine_ABC_transporter_substrate-binding_protein	1130.84	-1.02727	0.0799852	-12.8432	9.38712e-38	2.58015e-36
RS05450	spermidine/purescine_ABC_transporter_permease	765.828	-0.786251	0.0906876	-8.66988	4.32567e-18	4.21699e-17
RS05455	spermidine/putrescine_ABC_transporter_permease	593.286	-0.765811	0.0936554	-8.17691	2.91213e-16	2.43169e-15
RS05460	spermidine/putrescine_import_ATP-binding_protein_PotA	863.059	-0.627263	0.0867745	-7.22866	4.87795e-13	3.16507e-12
RS05465	UDP-N-acetylenolpyruvoylglucosamine_reductase	556.548	-0.421926	0.113569	-3.71516	0.000203078	0.000517236
RS05470	2-amino-4-hydroxy-6-hydroxymethyldihydropteridine_diphosphokinase	921.888	-0.176211	0.0842066	-2.09261	0.0363843	0.0622876
RS05475	dihydroneopterin_aldolase	445.171	-0.020621	0.0978048	-0.210838	0.833014	0.870398
RS05480	dihydropteroate_synthase	585.207	-0.0719166	0.0882762	-0.814677	0.415257	0.517177
RS05485	GTP_cyclohydrolase_I_FolE	609.942	0.00102803	0.0915104	0.011234	0.991037	0.993547
RS05490	dihydrofolate_synthase	1808.23	0.104961	0.0675438	1.55397	0.120192	0.181989
RS05495	protein_RarD	952.131	0.015564	0.0820572	0.189673	0.849565	0.883959
RS05500	homoserine_kinase	1129.73	0.29994	0.0799881	3.7498	0.000176974	0.000456624
RS05505	homoserine_dehydrogenase	846.434	0.16078	0.0928965	1.73074	0.0834983	0.132195
RS05510	deacetylase	832.14	0.77803	0.094496	8.23347	1.8186e-16	1.57162e-15
RS05515	choline_transporter	5233.25	0.713486	0.0618317	11.5392	8.37325e-31	1.70831e-29
RS05520	succinate-semialdehyde_dehydrogenase	6923.75	0.060535	0.0692439	0.874229	0.381993	0.48156
RS05525	membrane_protein	800.836	0.199226	0.0819574	2.43085	0.0150635	0.0280176
RS05530	hypothetical_protein	2184.53	0.591084	0.0717205	8.24149	1.70076e-16	1.47623e-15
RS05535	kinase	375.932	-1.15161	0.120251	-9.57676	1.0014e-21	1.14554e-20
RS05540	transcriptional_regulator	63.5166	0.305223	0.206441	1.4785	0.139274	0.205996
RS05545	hypothetical_protein	145.128	0.0256532	0.157937	0.162427	0.870969	0.900548
RS05550	2-Cys_peroxiredoxin	3119.21	0.0948027	0.202598	0.467936	0.63983	0.719855
RS05555	hypothetical_protein	312.866	-0.436668	0.111494	-3.91651	8.9841e-05	0.000242388
RS05560	hypothetical_protein	1050.86	-0.445253	0.0795732	-5.59552	2.19968e-08	9.2228e-08
RS05565	GntR_family_transcriptional_regulator	1899.7	-0.306717	0.0724608	-4.23287	2.30725e-05	6.77455e-05
RS05570	Asp23/Gls24_family_envelope_stress_response_protein	3378.58	0.272174	0.0761051	3.57629	0.000348507	0.000858898
RS05575	CsbD_family_protein	1022.45	0.382703	0.086848	4.40659	1.05012e-05	3.222e-05
RS05580	Asp23/Gls24_family_envelope_stress_response_protein	2811.95	0.381489	0.0802594	4.75321	2.00215e-06	6.68172e-06
RS05585	membrane_protein	1267.5	0.296191	0.101876	2.90738	0.00364476	0.00764087
RS05590	hypothetical_protein	2581.51	0.206399	0.100636	2.05094	0.0402723	0.068177
RS05595	GlsB/YeaQ/YmgE_family_stress_response_membrane_protein	1137.87	0.319647	0.0876953	3.64497	0.000267425	0.000670766
RS05600	GlsB/YeaQ/YmgE_family_stress_response_membrane_protein	1801.38	0.608793	0.079951	7.61458	2.64558e-14	1.96827e-13
RS05605	DNA_helicase_PcrA	1705.97	-0.291974	0.0692712	-4.21494	2.4984e-05	7.31409e-05
RS05610	thioesterase	1194.9	-0.166532	0.0961198	-1.73255	0.0831753	0.131789
RS05615	uracil_permease	914.799	-1.75834	0.239879	-7.33012	2.29947e-13	1.55313e-12
RS05620	sodium_alanine_symporter_family_protein	333.277	-0.97362	0.120753	-8.06288	7.45184e-16	6.01926e-15
RS05625	cation_transporter	2666.38	0.30667	0.0677281	4.52796	5.95555e-06	1.8708e-05
RS05630	murein_hydrolase_regulator_LrgA	236.339	-0.319019	0.131723	-2.42189	0.01544	0.0286371
RS05635	membrane_protein	284.706	-0.218909	0.119355	-1.8341	0.0666388	0.107568
RS05640	hypothetical_protein	1432.33	0.409015	0.0767824	5.32693	9.98849e-08	3.90657e-07
RS05650	30S_ribosomal_protein_S1	21345.5	-0.496309	0.0585584	-8.47546	2.3415e-17	2.19613e-16
RS05665	hypothetical_protein	482.121	0.52852	0.0981905	5.3826	7.34192e-08	2.9176e-07
RS05670	branched_chain_amino_acid_aminotransferase	1598.66	-0.353875	0.0835536	-4.23531	2.28235e-05	6.71141e-05
RS05675	DNA_topoisomerase_IV_subunit_A	3109.72	-0.25828	0.0598001	-4.31905	1.56699e-05	4.68442e-05
RS05680	DNA_topoisomerase_IV_subunit_B	2385.69	-0.145463	0.0702643	-2.07023	0.0384309	0.0653953
RS05685	glycerol-3-phosphate_acyltransferase	606.594	-0.206411	0.0941397	-2.1926	0.0283359	0.0496254
RS05690	uracil-DNA_glycosylase	866.877	0.53596	0.086815	6.17359	6.67565e-10	3.23802e-09
RS05695	hypothetical_protein	2340.92	-0.369117	0.0708408	-5.21051	1.88318e-07	7.11672e-07
RS05700	N-acylneuraminate_cytidylyltransferase	2010.84	-1.13861	0.0687223	-16.5682	1.18267e-61	7.55004e-60
RS05705	neuD_protein	946.328	-1.07876	0.0799647	-13.4905	1.77928e-41	5.86865e-40
RS05710	UDP-N-acetylglucosamine_2-epimerase_(hydrolyzing)	2284.52	-1.08442	0.0658404	-16.4705	5.98217e-61	3.6996e-59
RS05715	N-acetylneuraminate_synthase	1941.63	-0.963712	0.065734	-14.6608	1.14944e-48	4.73904e-47
RS05720	phage_capsid_assembly_protein	2846.92	-1.1731	0.0721229	-16.2653	1.73893e-59	1.04283e-57
RS05725	capsular_polysaccharide_biosynthesis_protein	1895.92	-1.20184	0.0673524	-17.844	3.21764e-71	3.35142e-69
RS05730	hypothetical_protein	1790.27	-1.26812	0.0715436	-17.7251	2.68475e-70	2.53005e-68
RS05735	hypothetical_protein	1963.02	-1.15603	0.0697291	-16.5789	9.89692e-62	6.52867e-60
RS05740	capsule_biosynthesis_protein_CapK	2069	-1.17035	0.0691021	-16.9366	2.41865e-64	1.70947e-62
RS05745	multidrug_MFS_transporter	709.222	-0.970923	0.086722	-11.1958	4.27478e-29	7.98094e-28
RS05750	UDP-N-acetylglucosamine--LPS_N-acetylglucosamine_transferase	861.488	-0.838162	0.0820357	-10.217	1.66338e-24	2.3182e-23
RS05755	galactosyl_transferase	3842.29	-0.722327	0.0627724	-11.5071	1.21523e-30	2.45402e-29
RS05760	tyrosine-protein_kinase_CpsD	2240.61	-0.626086	0.0632814	-9.89368	4.43415e-23	5.62512e-22
RS05765	capsular_polysaccharide_biosynthesis_protein_CpsC	2120.67	-0.657652	0.0715948	-9.18576	4.08649e-20	4.4435e-19
RS05770	hypothetical_protein	1462.88	-0.640226	0.0858582	-7.45679	8.86571e-14	6.11333e-13
RS05775	LytR_family_transcriptional_regulator	4679.74	-0.499483	0.0587321	-8.50443	1.82482e-17	1.71968e-16
RS05780	LysR_family_transcriptional_regulator	347.455	-0.427699	0.114279	-3.74258	0.000182138	0.000468117
RS05795	hypothetical_protein	2940.83	-0.110265	0.0801174	-1.37629	0.168733	0.243029
RS05800	purine-nucleoside_phosphorylase	1950.03	-0.0391363	0.0647001	-0.604887	0.545254	0.641409
RS05805	hypothetical_protein	2898.93	-0.0626399	0.0643193	-0.97389	0.330111	0.428387
RS05810	purine-nucleoside_phosphorylase	1990.04	0.0363553	0.063571	0.571885	0.5674	0.662078
RS05815	arsenate_reductase_(glutaredoxin)	1315.05	-0.0354557	0.0728149	-0.486929	0.626309	0.710295
RS05820	phosphopentomutase	2027.21	-0.00170216	0.0680658	-0.0250075	0.980049	0.986412
RS05825	ribose-5-phosphate_isomerase	1330.44	0.0933647	0.0686867	1.35928	0.174057	0.249066
RS05830	Zn-dependent_protease	2352.31	0.643097	0.0630584	10.1984	2.01478e-24	2.78829e-23
RS05835	transcriptional_regulator	750.465	-0.00897538	0.0871531	-0.102984	0.917976	0.935465
RS05840	ribonuclease_J	3830.12	-0.45752	0.0605862	-7.55156	4.30087e-14	3.09506e-13
RS05845	phosphonate_ABC_transporter_ATP-binding_protein	413.176	-0.882623	0.113313	-7.78927	6.73999e-15	5.19006e-14
RS05850	branched-chain_amino_acid_ABC_transporter_permease	231.984	-1.04053	0.148633	-7.00066	2.54762e-12	1.54655e-11
RS05855	peptide_ABC_transporter_substrate-binding_protein	162.22	-1.02285	0.1722	-5.9399	2.85196e-09	1.30649e-08
RS05860	hypothetical_protein	1205.49	-0.190657	0.0718109	-2.65498	0.00793131	0.0156516
RS05865	alpha-acetolactate_decarboxylase	8528.16	-0.174565	0.0917054	-1.90354	0.0569704	0.0934862
RS05870	acetolactate_synthase_AlsS	10113.6	-0.0259575	0.0990976	-0.261939	0.793369	0.840836
RS05875	hypothetical_protein	1698.14	0.387195	0.0717866	5.3937	6.90215e-08	2.74836e-07
RS05880	AI-2E_family_transporter	1736.81	0.388598	0.0700506	5.54739	2.89963e-08	1.20301e-07
RS05885	hypothetical_protein	633.082	0.458804	0.0871646	5.26365	1.41225e-07	5.46935e-07
RS05890	72C8-dihydro-8-oxoguanine_triphosphatase	500.247	0.713004	0.0938164	7.6	2.9613e-14	2.17733e-13
RS05895	hyaluronate_lyase	752.748	-0.249305	0.0873301	-2.85475	0.00430712	0.00896297
RS05900	dTDP-glucose_42C6-dehydratase	4614.84	0.0643476	0.0595729	1.08015	0.280076	0.374507
RS05905	dTDP-4-dehydrorhamnose_32C5-epimerase	2057.06	0.0629963	0.0649222	0.970336	0.331879	0.430117
RS05910	glucose-1-phosphate_thymidylyltransferase	2962.08	0.0933515	0.0648545	1.4394	0.150037	0.219803
RS05915	FAD-dependent_oxidoreductase	614.006	-0.120374	0.0905891	-1.3288	0.183915	0.260909
RS05920	Nif3-like_dinuclear_metal_center_hexameric_protein	642.757	-0.0291968	0.0870574	-0.335375	0.737342	0.794155
RS05925	SAM-dependent_methyltransferase	650.289	-0.118167	0.0904781	-1.30603	0.191542	0.270758
RS05930	DNA_replication_protein_DnaD	936.334	-0.725335	0.0803581	-9.02629	1.7759e-19	1.88952e-18
RS05935	adenine_phosphoribosyltransferase	2553.46	-0.306105	0.0673041	-4.54809	5.41355e-06	1.71415e-05
RS05940	hypothetical_protein	302.298	-0.395015	0.119536	-3.30457	0.000951225	0.0022043
RS05945	single-stranded-DNA-specific_exonuclease_RecJ	1418.55	-1.1607	0.0721217	-16.0937	2.82511e-58	1.5974e-56
RS05950	short-chain_dehydrogenase	815.998	-0.341124	0.0860059	-3.96629	7.29999e-05	0.00019899
RS05955	ribonuclease_Z	965.21	-0.28639	0.0757806	-3.7792	0.000157334	0.000409152
RS05960	hypothetical_protein	711.68	-0.243847	0.0841034	-2.89938	0.00373903	0.00783021
RS05965	GTPase_HflX	964.896	-0.0612437	0.0774262	-0.790995	0.428947	0.531218
RS05970	tRNA_(adenosine(37)-N6)-dimethylallyltransferase_MiaA	247.141	-0.0586278	0.122311	-0.479333	0.631702	0.713889
RS05975	DUF3042_domain-containing_protein	19385.7	1.47387	0.0859136	17.1553	5.73922e-66	4.36843e-64
RS05980	ethanolamine_utilization_protein_EutK	52.6788	-1.21598	0.246244	-4.93813	7.88756e-07	2.76274e-06
RS05985	pullulanase	58.1307	0.370055	0.234353	1.57905	0.114324	0.17366
RS05990	hypothetical_protein	1132.36	0.759317	0.0779803	9.73729	2.09051e-22	2.49224e-21
RS05995	uracil-DNA_glycosylase	902.162	0.626387	0.0811986	7.71426	1.21686e-14	9.26216e-14
RS06000	dipeptidase_PepV	6809.99	0.411643	0.0590738	6.96828	3.2084e-12	1.92407e-11
RS06005	NAD(P)H_nitroreductase	2233.43	0.320111	0.0721648	4.43584	9.17148e-06	2.83157e-05
RS06010	glycerophosphoryl_diester_phosphodiesterase	923.904	-0.138652	0.0909684	-1.52418	0.127464	0.191535
RS06025	excinuclease_ABC_subunit_C	1466.43	0.0112097	0.0730938	0.153361	0.878114	0.906514
RS06030	hypothetical_protein	312.063	-0.107548	0.127072	-0.846359	0.397352	0.498011
RS06035	MATE_family_efflux_transporter	1442.41	-0.00367733	0.0745051	-0.0493568	0.960635	0.970442
RS06040	VOC_family_protein	4314.13	0.29242	0.093117	3.14035	0.00168744	0.00373121
RS06045	hypothetical_protein	3162.09	0.393197	0.0750297	5.24056	1.60093e-07	6.12812e-07
RS06050	Lj965_prophage_superinfection_immunity_protein	971.936	0.622638	0.0818422	7.60779	2.78827e-14	2.05895e-13
RS06060	IS3_family_transposase	77.4606	0.197861	0.190199	1.04029	0.298206	0.393695
RS06075	histidine_triad_(HIT)_protein	139.686	-0.867825	0.160338	-5.41247	6.21628e-08	2.50041e-07
RS06080	adhesion_protein	41.6341	-0.80237	0.258762	-3.10081	0.00192995	0.00422964
RS06090	group_II_intron_reverse_transcriptase/maturase	13.9201	-0.402094	0.346669	-1.15988	0.246099	0.335189
RS06095	peptidase_C5	1518.28	-0.621706	0.0766039	-8.11585	4.82393e-16	3.92863e-15
RS06100	hypothetical_protein	17.6718	-0.19974	0.325239	-0.614134	0.539127	0.636214
RS06105	hypothetical_protein	229.086	-0.136899	0.135025	-1.01388	0.31064	0.407135
RS06110	hypothetical_protein	55.1054	-0.256413	0.23124	-1.10886	0.267489	0.36011
RS06130	hypothetical_protein	278.385	0.114131	0.120434	0.947665	0.3433	0.442024
RS06135	site-specific_integrase	892.032	0.103074	0.0787986	1.30807	0.19085	0.269973
RS06140	hypothetical_protein	51.7574	0.349918	0.229644	1.52374	0.127573	0.191553
RS06145	hypothetical_protein	15.8364	-0.168791	0.338972	-0.497951	0.618519	0.704471
RS06150	cell_division_protein_FtsK	21.6889	-0.370741	0.320803	-1.15567	0.247818	0.337066
RS06155	hypothetical_protein	2.10551	-0.340675	0.350196	-0.972813	0.330646	NA
RS06160	hypothetical_protein	336.941	0.0976537	0.111739	0.873943	0.38215	0.48156
RS06165	serine/threonine_protein_kinase	2016.86	-0.16612	0.0651008	-2.55174	0.0107186	0.0204356
RS06170	type_II_restriction_endonuclease_Eco47II	1122.39	-0.194122	0.0750506	-2.58654	0.00969441	0.0186991
RS06175	DNA_(cytosine-5-)-methyltransferase	1173.28	-0.160443	0.0823584	-1.9481	0.0514024	0.0847712
RS06180	50S_ribosomal_protein_L7/L12	14956.3	-0.806042	0.0541289	-14.8911	3.76264e-50	1.77292e-48
RS06185	50S_ribosomal_protein_L10	7408.99	-0.848772	0.0654798	-12.9623	2.00034e-38	5.65525e-37
RS06190	ATP-dependent_Clp_protease_ATP-binding_subunit	1388.21	0.510376	0.100211	5.09303	3.52393e-07	1.30353e-06
RS06195	homocysteine_S-methyltransferase	235.591	-0.368105	0.130302	-2.82502	0.00472782	0.00975637
RS06200	amino_acid_transporter	272.021	0.0627628	0.12775	0.491293	0.623219	0.708415
RS06205	HXXEE_domain-containing_protein	60.2738	0.401884	0.215144	1.86798	0.0617653	0.100521
RS06215	TetR_family_transcriptional_regulator	101.314	0.0724249	0.179105	0.404371	0.68594	0.757097
RS06220	GTP-binding_protein	2566.78	0.414967	0.0660091	6.28652	3.2466e-10	1.61839e-09
RS06225	ATP-dependent_Clp_protease_ATP-binding_subunit_ClpX	3265.7	0.452256	0.063009	7.17765	7.09221e-13	4.54223e-12
RS06230	hypothetical_protein	528.627	0.601479	0.0955803	6.29292	3.11557e-10	1.557e-09
RS06235	dihydrofolate_reductase	1959.51	0.835571	0.0842049	9.92307	3.30441e-23	4.21898e-22
RS06240	thymidylate_synthase	1735.34	0.695794	0.0838467	8.29841	1.05516e-16	9.2807e-16
RS06245	hydroxymethylglutaryl-CoA_synthase	1685.96	0.093266	0.0837498	1.11363	0.265439	0.357836
RS06250	hydroxymethylglutaryl-CoA_reductase2C_degradative	1796.4	-0.202172	0.0654281	-3.08999	0.00200162	0.00436737
RS06255	hypothetical_protein	1941.16	4.17803	0.0819144	51.0048	0	0
RS06260	hemolysin_III	2720.07	4.14122	0.0840453	49.2737	0	0
RS06265	diacylglycerol_kinase	5270.79	1.87741	0.0941074	19.9496	1.51061e-88	2.13536e-86
RS06270	hypothetical_protein	3146.06	0.402024	0.0801952	5.01307	5.35681e-07	1.91356e-06
RS06275	DUF4649_domain-containing_protein	712.105	-0.64976	0.0864762	-7.51375	5.74583e-14	4.07562e-13
RS06280	type_2_isopentenyl-diphosphate_Delta-isomerase	1274.56	-0.455845	0.0752534	-6.05747	1.38278e-09	6.50006e-09
RS06285	phosphomevalonate_kinase	1042.33	-0.501739	0.0790084	-6.35045	2.14686e-10	1.0922e-09
RS06290	diphosphomevalonate_decarboxylase	897.508	-0.467095	0.0808483	-5.77743	7.58505e-09	3.32834e-08
RS06295	mevalonate_kinase	834.326	-0.119714	0.0801625	-1.49339	0.135335	0.201503
RS06300	two-component_sensor_histidine_kinase	847.116	0.327637	0.0965278	3.39423	0.000688231	0.00162725
RS06305	DNA-binding_response_regulator	394.783	0.608233	0.111498	5.45508	4.89497e-08	1.99324e-07
RS06310	GTP_pyrophosphokinase	427.197	0.754958	0.108497	6.95834	3.44302e-12	2.05233e-11
RS06315	ABC_transporter	600.889	-1.10632	0.0991887	-11.1537	6.86723e-29	1.25653e-27
RS06320	ABC_transporter	538.252	-1.06668	0.104232	-10.2337	1.40114e-24	1.96657e-23
RS06325	MarR_family_transcriptional_regulator	166.264	-1.07381	0.166077	-6.46576	1.0079e-10	5.29078e-10
RS06330	bifunctional_metallophosphatase/5'-nucleotidase	254.525	-1.27861	0.127154	-10.0556	8.67575e-24	1.16798e-22
RS06335	peptide_deformylase	2258.86	-0.0200714	0.0790254	-0.253987	0.799506	0.84571
RS06340	glutamate_dehydrogenase	2020.77	0.0105104	0.0832548	0.126243	0.899539	0.920946
RS06345	membrane_protein	7479.92	0.765668	0.0658245	11.632	2.8348e-31	5.96815e-30
RS06350	multidrug_ABC_transporter_ATP-binding_protein	1427.12	-0.216988	0.0780772	-2.77915	0.00545009	0.0110617
RS06355	multidrug_ABC_transporter_ATP-binding_protein	1223.13	-0.242544	0.0725843	-3.34155	0.000833133	0.00195352
RS06365	antibiotic_ABC_transporter_ATP-binding_protein	1333.44	-0.233741	0.072987	-3.2025	0.00136242	0.00306389
RS06370	CCA_tRNA_nucleotidyltransferase	777.283	-0.276027	0.0861612	-3.20361	0.00135718	0.00305906
RS06375	hypothetical_protein	2378.49	-0.264647	0.0718721	-3.6822	0.000231232	0.000585927
RS06380	transposase	923.36	-0.0573693	0.0782294	-0.733347	0.463347	0.564285
RS06385	hypothetical_protein	249.201	0.419039	0.121288	3.4549	0.000550488	0.0013205
RS06390	hypothetical_protein	852.631	0.878752	0.0818956	10.7301	7.34778e-27	1.15407e-25
RS06395	PTS_fructose_transporter_subunit_IIC	1314.46	2.6208	0.113426	23.1059	4.04e-118	9.99396e-116
RS06400	1-phosphofructokinase	379.524	2.63321	0.153478	17.1569	5.5771e-66	4.36843e-64
RS06405	DeoR_family_transcriptional_regulator	302.448	2.26274	0.154214	14.6727	9.6409e-49	4.05943e-47
RS06410	peptidoglycan_branched_peptide_synthesis_protein	3118.39	1.59731	0.0708225	22.5537	1.23635e-112	2.44674e-110
RS06415	hypothetical_protein	10091	1.44142	0.0756563	19.0523	6.28903e-81	7.77875e-79
RS06420	2-dehydropantoate_2-reductase	2020.05	0.0879521	0.072102	1.21983	0.22253	0.307963
RS06425	membrane_protein	1729.43	0.152158	0.0666685	2.2823	0.0224714	0.0401362
RS06430	ferredoxin--NADP(+)_reductase	446.531	-0.231245	0.0986229	-2.34474	0.0190406	0.0345383
RS06435	tRNA_(guanosine(37)-N1)-methyltransferase_TrmD	302.333	-0.00694254	0.116031	-0.0598337	0.952288	0.964472
RS06440	ribosome_maturation_factor_RimM	97.2837	0.302659	0.182325	1.65999	0.0969156	0.150428
RS06455	transcriptional_regulator	1765.07	0.247527	0.0674111	3.67191	0.000240747	0.000609256
RS06460	RNA-binding_protein	5343.91	-0.662493	0.0932008	-7.10823	1.17539e-12	7.31479e-12
RS06465	30S_ribosomal_protein_S16	4591.73	-0.593495	0.0620215	-9.56918	1.07756e-21	1.22557e-20
RS06470	permease	3794.91	-0.54563	0.0650385	-8.38935	4.88856e-17	4.43782e-16
RS06475	macrolide_ABC_transporter_ATP-binding_protein	1846.47	-0.467098	0.0645828	-7.23254	4.74047e-13	3.08599e-12
RS06480	ABC_transporter_substrate-binding_protein	4990.66	-0.468796	0.0601637	-7.79202	6.59454e-15	5.09789e-14
RS06485	carbamoyl_phosphate_synthase_large_subunit	1085.81	-0.245295	0.0734742	-3.33851	0.000842284	0.00197031
RS06490	carbamoyl_phosphate_synthase_small_subunit	681.074	-0.137422	0.0920641	-1.49267	0.135523	0.201503
RS06495	bifunctional_pyrimidine_operon_transcriptional_regulator/uracil_phosphoribosyltransferase	340.461	-0.0596602	0.105794	-0.563928	0.572803	0.66606
RS06500	RNA_pseudouridine_synthase	1048.63	0.0685836	0.0782199	0.876805	0.380593	0.480659
RS06505	signal_peptidase_II	382.989	0.223975	0.101039	2.21671	0.0266427	0.0468674
RS06510	LysR_family_transcriptional_regulator	840.898	0.319454	0.0825011	3.87212	0.000107891	0.000285832
RS06515	50S_ribosomal_protein_L27	5872.99	-0.605078	0.0607022	-9.96796	2.10501e-23	2.75881e-22
RS06520	hypothetical_protein	2794.71	-0.544094	0.0648926	-8.38453	5.09287e-17	4.60219e-16
RS06525	50S_ribosomal_protein_L21	3899.36	-0.581539	0.0660276	-8.80752	1.27949e-18	1.31197e-17
RS06530	metallophosphatase	1895.29	0.450916	0.0728737	6.18764	6.10701e-10	2.96948e-09
RS06535	tRNA_4-thiouridine(8)_synthase_ThiI	1733.22	-0.297247	0.0713208	-4.16775	3.07623e-05	8.82299e-05
RS06540	aminotransferase_V	1471.23	-0.17128	0.070328	-2.43544	0.0148735	0.0277163
RS06545	hypothetical_protein	3553.98	0.761626	0.0776859	9.80392	1.08304e-22	1.33126e-21
RS06550	glutathione-disulfide_reductase	3338.46	0.185498	0.073796	2.51365	0.0119488	0.02265
RS06555	glycosyl_transferase_family_8	715.319	0.213898	0.0980408	2.18173	0.0291297	0.0508356
RS06560	hypothetical_protein	344.618	0.0957406	0.108829	0.879731	0.379005	0.47896
RS06565	accessory_Sec_system_glycosyltransferase_GtfB	530.486	0.121204	0.0999071	1.21317	0.225066	0.310604
RS06570	accessory_Sec_system_glycosyltransferase_GtfA	492.242	0.179333	0.118507	1.51327	0.130211	0.194775
RS06575	accessory_Sec_system_translocase_SecA2	988.505	0.280766	0.0793206	3.53964	0.000400679	0.000976531
RS06580	accessory_Sec_system_protein_Asp3	244.166	0.324413	0.125163	2.59192	0.00954426	0.0184274
RS06585	accessory_Sec_system_protein_Asp2	560.132	0.501594	0.0911216	5.50467	3.69859e-08	1.51857e-07
RS06590	accessory_Sec_system_protein_Asp1	697.81	0.746837	0.0888058	8.40978	4.10787e-17	3.78115e-16
RS06595	accessory_Sec_system_protein_translocase_subunit_SecY2	393.386	0.871127	0.105342	8.26952	1.34503e-16	1.17779e-15
RS06600	cell_wall_anchor	4162.46	0.787351	0.0718955	10.9513	6.54858e-28	1.12692e-26
RS06605	hypothetical_protein	4893.17	0.276012	0.0655975	4.20766	2.58025e-05	7.52035e-05
RS06610	chorismate_synthase	541.547	-0.0387194	0.0950713	-0.407266	0.683812	0.755222
RS06615	3-dehydroquinate_synthase	527.77	-0.02244	0.100053	-0.224281	0.822538	0.864109
RS06620	3-dehydroquinase	1747.48	-0.402174	0.0839319	-4.79167	1.65397e-06	5.6048e-06
RS06625	SAM-dependent_methyltransferase	1961.91	-0.268104	0.0742052	-3.61302	0.000302657	0.000750574
RS06630	alkaline_phosphatase	8403.39	0.289205	0.0596478	4.84855	1.24365e-06	4.24343e-06
RS06635	50S_ribosomal_protein_L20	9912.81	-0.885942	0.0787634	-11.2481	2.36513e-29	4.54426e-28
RS06640	50S_ribosomal_protein_L35	1945.36	-0.701779	0.0647428	-10.8395	2.23708e-27	3.68931e-26
RS06645	translation_initiation_factor_IF-3	3056.56	-0.614856	0.0707981	-8.68464	3.79947e-18	3.74087e-17
RS06650	cytidylate_kinase	2008.06	-0.453171	0.0694001	-6.52983	6.58428e-11	3.50277e-10
RS06655	membrane_protein	1295.34	-0.0795411	0.0730522	-1.08883	0.276231	0.369615
RS06660	ferredoxin	111.465	0.0481629	0.173332	0.277865	0.781116	0.830644
RS06665	hypothetical_protein	1014.73	0.0705418	0.0822582	0.857566	0.391132	0.491149
RS06670	peptidase_T	2667.68	-0.0167006	0.0705674	-0.236662	0.812919	0.855727
RS06675	polysaccharide_biosynthesis_protein	1968.6	0.337366	0.0668909	5.04353	4.57031e-07	1.6415e-06
RS06680	UDP-N-acetylmuramoylalanyl-D-glutamate--22C_6-diaminopimelate_ligase	2527.17	-0.0260984	0.0687526	-0.379598	0.704244	0.770424
RS06685	iron_ABC_transporter_ATP-binding_protein	242.247	-0.35139	0.12942	-2.71511	0.0066254	0.0132307
RS06690	ferrichrome_ABC_transporter_substrate-binding_protein	458.512	-0.415051	0.120499	-3.44444	0.000572238	0.00136668
RS06695	ferrichrome_ABC_transporter_permease	217.339	-0.357826	0.128283	-2.78934	0.00528152	0.0107754
RS06700	ferrichrome_ABC_transporter_permease	176.891	-0.190283	0.139778	-1.36132	0.173412	0.248502
RS06705	hypothetical_protein	503.448	-0.103772	0.0949596	-1.0928	0.27448	0.368269
RS06710	manganese-dependent_inorganic_pyrophosphatase	5574.53	-0.0391792	0.0566204	-0.691961	0.488962	0.58824
RS06715	pyruvate_formate_lyase-activating_protein	930.653	-0.262933	0.0839902	-3.13052	0.00174496	0.00384124
RS06720	hypothetical_protein	2767.66	-0.263199	0.06423	-4.09776	4.17162e-05	0.000116605
RS06725	transposase	69.0735	0.0595063	0.205517	0.289544	0.772165	0.822894
RS06730	SAM-dependent_methyltransferase	473.587	-0.240224	0.104059	-2.30854	0.0209692	0.0376913
RS06735	TIGR01212_family_radical_SAM_protein	553.614	-0.0984996	0.0971528	-1.01386	0.310649	0.407135
RS06740	phosphatase_PAP2_family_protein	1359.58	-0.109684	0.0955033	-1.14848	0.250769	0.339912
RS06745	membrane_protein	1008.45	0.00068153	0.0861278	0.00791301	0.993686	0.995699
RS06750	sortase	379.234	0.396117	0.105286	3.76231	0.000168354	0.000435519
RS06755	hypothetical_protein	371.402	0.443428	0.10799	4.10618	4.0225e-05	0.000112915
RS06760	class_C_sortase	537.31	0.488775	0.105151	4.64832	3.34647e-06	1.09105e-05
RS06765	hypothetical_protein	1191.75	0.491053	0.0964774	5.08983	3.58391e-07	1.32324e-06
RS06770	hypothetical_protein	3035.55	0.532345	0.101409	5.24949	1.52521e-07	5.86097e-07
RS06775	signal_peptidase_I	255.317	0.5811	0.120957	4.80417	1.55394e-06	5.28394e-06
RS06780	hypothetical_protein	153.499	0.959521	0.158611	6.04953	1.45267e-09	6.8124e-09
RS06785	glycosyl_transferase	2681.3	-0.284122	0.0681364	-4.1699	3.04733e-05	8.75277e-05
RS06790	glycosyl_transferase_family_2	1483.2	-0.375775	0.0694732	-5.40892	6.34045e-08	2.54518e-07
RS06795	polysaccharide_biosynthesis_protein	2802.28	-0.301607	0.0615584	-4.89953	9.60666e-07	3.3237e-06
RS06800	membrane_protein	2246.27	-0.25321	0.0660553	-3.8333	0.000126437	0.00033318
RS06805	glycosyl_transferase_family_2	1851.51	-0.166126	0.0657715	-2.52581	0.0115433	0.0219234
RS06810	glycosyl_transferase_family_2	2430.02	-0.0167693	0.0620794	-0.270127	0.787062	0.835172
RS06815	nucleotide_sugar_dehydratase	2589.58	0.0574573	0.0609282	0.943032	0.345664	0.444779
RS06820	2-C-methyl-D-erythritol_4-phosphate_cytidylyltransferase	1802.2	0.0789441	0.0662239	1.19208	0.233231	0.319642
RS06825	LicD_family_protein	1245.08	-0.017904	0.0744401	-0.240516	0.80993	0.854399
RS06830	hypothetical_protein	2489.11	-0.216525	0.0645989	-3.35184	0.00080277	0.0018868
RS06835	hypothetical_protein	604.43	-0.111681	0.087948	-1.26986	0.204135	0.285501
RS06840	glycosyl_transferase_family_2	893.673	-0.0986617	0.080337	-1.2281	0.21941	0.304283
RS06845	alpha-L-Rha_alpha-12C3-L-rhamnosyltransferase	1229.92	-0.0790713	0.0724471	-1.09144	0.275081	0.368825
RS06850	rhamnosyltransferase	1279.98	0.121685	0.0731393	1.66374	0.096164	0.149496
RS06855	NAD(P)-dependent_oxidoreductase	2750.75	0.103126	0.0673496	1.53121	0.125718	0.189486
RS06860	aromatic_ring_hydroxylase	1421.57	0.246088	0.0771978	3.18776	0.00143378	0.00320616
RS06865	RNA_polymerase_sigma_factor_RpoD	1767.01	-0.0283937	0.0675611	-0.420268	0.67429	0.748266
RS06870	DNA_primase	2453.41	-0.0128659	0.0698458	-0.184205	0.853853	0.887487
RS06875	large-conductance_mechanosensitive_channel	8715.88	0.22105	0.0737858	2.99584	0.00273693	0.0058746
RS06880	IS3_family_transposase	155.191	0.0498876	0.147356	0.338551	0.734948	0.792209
RS06890	30S_ribosomal_protein_S21	7280.65	-0.646156	0.0982782	-6.57476	4.87315e-11	2.61354e-10
RS06895	Fe-S_oxidoreductase	91.6834	-0.24132	0.195696	-1.23314	0.217525	0.302092
RS06900	amino_acid_ABC_transporter_substrate-binding_protein	113.398	-0.0180006	0.169073	-0.106467	0.915212	0.934092
RS06905	ammonium_transporter	72.9555	-0.149413	0.202356	-0.73837	0.46029	0.56113
RS06910	pyridine_nucleotide-disulfide_oxidoreductase	124.087	-0.0940441	0.16473	-0.570897	0.568069	0.662469
RS06915	sulfurtransferase	8022.48	-0.266266	0.110599	-2.40749	0.0160626	0.0296528
RS06920	hypothetical_protein	1730.93	0.984878	0.100441	9.80554	1.06578e-22	1.31824e-21
RS06925	glycerol-3-phosphate_transporter	420.824	0.728928	0.106549	6.84125	7.85076e-12	4.51647e-11
RS06930	maltodextrin_phosphorylase	616.353	-0.131685	0.0933045	-1.41135	0.158142	0.230289
RS06935	4-alpha-glucanotransferase	245.493	-0.151091	0.123588	-1.22254	0.221505	0.306974
RS06940	LacI_family_transcriptional_regulator	1384.05	-0.715285	0.0727264	-9.83528	7.93427e-23	9.93792e-22
RS06945	hypothetical_protein	1462.65	-0.827933	0.0830819	-9.96526	2.16301e-23	2.81618e-22
RS06950	maltose_ABC_transporter_permease	311.932	-0.478145	0.126087	-3.79218	0.000149331	0.000389876
RS06955	maltose_ABC_transporter_permease	371.178	-0.467626	0.11607	-4.02885	5.60512e-05	0.000154708
RS06960	MFS_transporter	2119.42	-0.113275	0.0708656	-1.59845	0.109944	0.168144
RS06970	IS3_family_transposase	316.868	0.0195306	0.109975	0.177591	0.859044	0.89101
RS06975	72C8-dihydro-8-oxoguanine_triphosphatase	115.381	0.452811	0.163418	2.77087	0.00559061	0.0113243
RS06980	peptidase	26.2903	0.268012	0.291352	0.919888	0.357631	0.458141
RS06985	peptidase	69.0158	-0.214158	0.203452	-1.05262	0.292513	0.387992
RS06990	excinuclease_ABC_subunit_B	3190.62	0.189359	0.0636236	2.97625	0.002918	0.00622947
RS06995	CPBP_family_intramembrane_metalloprotease_domain-containing_protein	1194.05	-0.451081	0.0989552	-4.55844	5.15355e-06	1.63969e-05
RS07000	glutamine_ABC_transporter_permease	23852.6	0.0845927	0.0616571	1.37199	0.170068	0.244162
RS07005	peptide_ABC_transporter_ATP-binding_protein	18392.7	0.0760178	0.0551844	1.37752	0.168351	0.242655
RS07010	hypothetical_protein	201.296	0.0228646	0.134801	0.169617	0.865311	0.896571
RS07015	hypothetical_protein	769.247	-0.688718	0.0961903	-7.15996	8.07003e-13	5.13524e-12
RS07020	GTPase_ObgE	1552.32	-0.687385	0.0836946	-8.21302	2.15702e-16	1.83998e-15
RS07025	DUF4044_domain-containing_protein	1004.53	0.535006	0.0884898	6.04596	1.48523e-09	6.94861e-09
RS07030	aminopeptidase	573.417	0.647868	0.108165	5.98964	2.10311e-09	9.70178e-09
RS07035	cell_wall_surface_anchor_protein	3108.37	-0.0544412	0.078646	-0.69223	0.488793	0.58824
RS07040	amidase	1873.73	-0.395402	0.11075	-3.57021	0.000356694	0.000875803
RS07045	hypothetical_protein	59.7735	-0.471356	0.220821	-2.13456	0.0327971	0.0565871
RS07050	16S_rRNA_pseudouridine(516)_synthase	138.123	0.352032	0.159413	2.2083	0.0272237	0.0478044
RS07055	aldo/keto_reductase	7747.18	0.846713	0.0914171	9.26208	2.00481e-20	2.21649e-19
RS07060	NAD(P)H-dependent_oxidoreductase	1292.57	0.77431	0.070953	10.913	9.99107e-28	1.67562e-26
RS07065	lactoylglutathione_lyase	4325.07	0.626718	0.0860111	7.28647	3.18176e-13	2.10592e-12
RS07070	glycosyltransferase	691.182	0.719627	0.0879827	8.17919	2.8576e-16	2.40229e-15
RS07075	amino_acid_transporter	4261.39	-0.180786	0.06338	-2.85242	0.00433882	0.00901946
RS07080	SsrA-binding_protein	877.408	-0.0422405	0.0830354	-0.508704	0.61096	0.698088
RS07085	ribonuclease_R	1895.23	-0.0611565	0.0679876	-0.899524	0.368374	0.468818
RS07090	preprotein_translocase_subunit_SecG	4439.5	-0.559996	0.0715401	-7.82772	4.96794e-15	3.87069e-14
RS07095	MFS_transporter	2107.04	-0.0286753	0.0715784	-0.400613	0.688705	0.758879
RS07100	hypothetical_protein	359.39	-0.420781	0.116006	-3.62722	0.000286488	0.000714054
RS07105	ABC_transporter_ATP-binding_protein	123.619	-0.377199	0.166545	-2.26485	0.0235219	0.0417113
RS07110	dephospho-CoA_kinase	333.917	0.0475204	0.110221	0.431135	0.66637	0.742537
RS07115	formamidopyrimidine-DNA_glycosylase	176.736	0.298858	0.145212	2.05807	0.039583	0.0672401
RS07120	transcriptional_regulator	130.578	0.27269	0.161253	1.69107	0.0908237	0.142425
RS07125	transglutaminase	195.111	-0.004528	0.131265	-0.0344951	0.972482	0.97991
RS07130	hypothetical_protein	29.6337	0.219541	0.291424	0.75334	0.451246	0.55398
RS07135	hypothetical_protein	33.2592	0.212972	0.268814	0.792264	0.428207	0.530633
RS07140	hypothetical_protein	63.2671	-0.237139	0.213421	-1.11113	0.266512	0.359038
RS07145	hypothetical_protein	834.753	-0.0478238	0.0807849	-0.591989	0.553858	0.648188
RS07150	GTPase_Era	1692.68	-0.304919	0.0685298	-4.44943	8.60976e-06	2.67064e-05
RS07155	UDP_kinase	521.22	-0.0396428	0.0965352	-0.410656	0.681325	0.753685
RS07160	endoribonuclease_YbeY	1154.37	0.0353994	0.0745686	0.474722	0.634985	0.715624
RS07165	polyketide_synthesis_methyltransferase	270.262	0.578315	0.126881	4.55792	5.16618e-06	1.64107e-05
RS07170	DNA_mismatch_repair_protein_MutT	122.573	0.0926097	0.165553	0.559397	0.575891	0.666874
RS07175	nucleotidyltransferase	273.891	0.0789493	0.123832	0.637553	0.523765	0.619934
RS07180	PhoH_family_protein	1555.92	0.21112	0.0804867	2.62304	0.00871487	0.0169918
RS07185	oleate_hydratase	4304.09	1.23655	0.078435	15.7653	5.3917e-56	2.80794e-54
RS07190	hypothetical_protein	1117.52	0.432371	0.0778589	5.55327	2.80372e-08	1.16567e-07
RS07195	peptide-methionine_(S)-S-oxide_reductase	875.918	0.65157	0.0794497	8.20104	2.38319e-16	2.02417e-15
RS07200	S1_RNA-binding_protein	1186.28	-0.162801	0.0716896	-2.27091	0.0231523	0.0411296
RS07205	ribosome-recycling_factor	3416.43	-0.519885	0.063961	-8.12815	4.35878e-16	3.56447e-15
RS07210	UMP_kinase	2143.26	-0.299893	0.0660184	-4.54256	5.55752e-06	1.74854e-05
RS07215	ABC_transporter_ATP-binding_protein	20.2562	0.058728	0.313132	0.18755	0.851229	0.885225
RS07220	peptide_ABC_transporter_ATP-binding_protein	34.3752	-0.0754223	0.26741	-0.282047	0.777907	0.828122
RS07225	peptide_ABC_transporter_permease	20.0564	-0.57783	0.319408	-1.80907	0.0704403	0.113334
RS07230	peptide_ABC_transporter_permease	28.5624	0.0627915	0.283033	0.221852	0.824429	0.864879
RS07235	nickel_ABC_transporter2C_nickel/metallophore_periplasmic_binding_protein	53.9658	-0.252155	0.224382	-1.12378	0.261108	0.35296
RS07240	50S_ribosomal_protein_L1	17145.1	-0.532624	0.0510666	-10.43	1.80926e-25	2.65224e-24
RS07245	50S_ribosomal_protein_L11	6225.06	-0.326369	0.0565276	-5.77363	7.75835e-09	3.39685e-08
RS07250	transposase	53.0008	-0.153297	0.222635	-0.68856	0.491101	0.589738
RS07255	MFS_transporter	642.273	-0.255162	0.099406	-2.56686	0.0102623	0.0196794
RS07260	amidohydrolase	374.431	-0.134204	0.122723	-1.09356	0.274149	0.368074
RS07265	LysR_family_transcriptional_regulator	686.526	-0.252824	0.102931	-2.45626	0.0140393	0.0262606
RS07275	IS3_family_transposase	366.48	0.0245379	0.111325	0.220417	0.825547	0.864879
RS07280	aminodeoxychorismate_synthase2C_component_I	593.909	0.347172	0.0892077	3.89173	9.95311e-05	0.0002669
RS07285	cell_division_protein_FtsK	1873.63	-0.346898	0.0684197	-5.07015	3.97506e-07	1.45409e-06
RS07290	peptidyl-prolyl_cis-trans_isomerase	1419.91	0.564851	0.072727	7.76674	8.05347e-15	6.1536e-14
RS07295	manganese_ABC_transporter_permease	1880.24	-0.637702	0.0663329	-9.61366	7.00156e-22	8.10297e-21
RS07300	manganese_ABC_transporter_ATP-binding_protein	1130.69	-0.718005	0.07997	-8.97843	2.74665e-19	2.87599e-18
RS07305	metal_ABC_transporter_substrate-binding_protein	2627.66	-0.833303	0.0687416	-12.1223	8.05027e-34	1.89661e-32
RS07310	MarR_family_transcriptional_regulator	2108.05	0.105918	0.0692351	1.52983	0.12606	0.189857
RS07315	5'-methylthioadenosine/S-adenosylhomocysteine_nucleosidase	1221.41	-0.428993	0.0803639	-5.33813	9.39111e-08	3.6875e-07
RS07320	hypothetical_protein	276.733	-0.14236	0.118752	-1.1988	0.230606	0.316923
RS07325	ADP-ribose_pyrophosphatase	545.095	-0.313732	0.0920639	-3.40776	0.000654975	0.00155793
RS07330	bifunctional_N-acetylglucosamine-1-phosphate_uridyltransferase/glucosamine-1-phosphate_acetyltransferase	1610.72	-0.337141	0.0702829	-4.79692	1.61122e-06	5.46932e-06
RS07335	VOC_family_protein	123.124	1.09124	0.164229	6.64463	3.03978e-11	1.67569e-10
RS07340	glyoxalase/bleomycin_resistance/extradiol_dioxygenase_family_protein	127.476	1.16677	0.17067	6.83643	8.11909e-12	4.6573e-11
RS07345	NAD(P)-dependent_oxidoreductase	1723.41	0.271157	0.0668534	4.05599	4.99216e-05	0.000138562
RS07350	RNA-binding_protein	393.811	0.353302	0.100368	3.52006	0.00043145	0.00104894
RS07355	NAD(P)-dependent_dehydrogenase	526.431	0.438601	0.0955941	4.58816	4.47174e-06	1.43197e-05
RS07360	hypothetical_protein	208.913	0.523668	0.127291	4.11393	3.88984e-05	0.000109658
RS07365	aminoacyl-tRNA_synthetase	395.986	0.532447	0.109481	4.86337	1.15405e-06	3.95134e-06
RS07370	N-acetyltransferase	298.244	0.454802	0.1216	3.74016	0.000183905	0.000471435
RS07375	glycosyl_transferase	34.0814	0.224116	0.266208	0.841881	0.399855	0.500198
RS07380	hypothetical_protein	81.2347	-0.130675	0.199514	-0.654966	0.51249	0.609505
RS07385	hypothetical_protein	24.1898	0.105956	0.306273	0.345953	0.729378	0.788334
RS07390	DUF4956_domain-containing_protein	7.87762	-0.16517	0.381696	-0.432727	0.665213	0.741666
RS07395	molecular_chaperone	6.40283	0.140365	0.387099	0.362607	0.716899	0.779529
RS07400	branched-chain_amino_acid_ABC_transporter_substrate-binding_protein	302.428	-0.89862	0.119243	-7.53604	4.84463e-14	3.4612e-13
RS07405	methionine--tRNA_ligase	6188.14	0.329028	0.0574263	5.72956	1.00692e-08	4.36037e-08
RS07410	tellurite_resistance_methyltransferase_TehB	806.968	0.493197	0.0912724	5.40357	6.53262e-08	2.61173e-07
RS07415	DUF1275_family_protein	77.565	-0.324371	0.197708	-1.64066	0.100868	0.155829
RS07420	hypothetical_protein	831.995	0.362402	0.0868599	4.17226	3.01589e-05	8.67508e-05
RS07425	acyltransferase	682.758	0.082695	0.0910847	0.907891	0.363936	0.464065
RS07430	exodeoxyribonuclease	1566.9	-0.213621	0.081222	-2.63008	0.00853636	0.0167096
RS07435	arsenate_reductase_family_protein	611.108	0.262777	0.102085	2.57409	0.0100504	0.0193292
RS07440	methylated-DNA--protein-cysteine_methyltransferase	476.564	0.438262	0.0953252	4.59755	4.2749e-06	1.37115e-05
RS07445	phosphoglycerate_dehydrogenase	807.497	0.328447	0.0934569	3.51443	0.000440706	0.00107013
RS07450	acetyltransferase	376.445	0.467723	0.102123	4.58	4.64977e-06	1.48657e-05
RS07455	phosphoserine_transaminase	570.962	0.344222	0.0889765	3.86868	0.000109424	0.000289506
RS07460	copper_homeostasis_protein_CutC	637.15	0.306303	0.0893795	3.42699	0.000610302	0.00145342
RS07465	rRNA_(cytidine-2'-O-)-methyltransferase	1531.54	-0.0361705	0.0679927	-0.531977	0.594742	0.685096
RS07470	initiation-control_protein_YabA	455.037	0.0104901	0.0984782	0.106522	0.915168	0.934092
RS07475	DNA_polymerase_III_subunit_delta'	1133.89	0.0369112	0.0814276	0.453301	0.650332	0.729183
RS07480	thymidylate_kinase	1241.36	0.471983	0.0794873	5.93784	2.88803e-09	1.31996e-08
RS07485	transposase	49.6279	-0.154782	0.236997	-0.653095	0.513695	0.610572
RS07490	CBS_domain-containing_protein	15.2258	-0.236998	0.341215	-0.694573	0.487323	0.586983
RS07500	branched-chain_amino_acid_ABC_transporter_permease	7.75914	-0.0581182	0.385458	-0.150777	0.880152	0.908144
RS07505	branched-chain_amino_acid_ABC_transporter_permease	6.50822	-0.352791	0.389185	-0.906487	0.364678	0.464712
RS07510	branched-chain_amino_acid_ABC_transporter_substrate-binding_protein	73.7647	-0.545581	0.216063	-2.5251	0.0115667	0.0219467
RS07515	hypothetical_protein	327.823	0.794872	0.109098	7.28584	3.1968e-13	2.10883e-12
RS07520	ATP-dependent_Clp_protease_proteolytic_subunit	4046.89	0.72202	0.0699765	10.318	5.84038e-25	8.31518e-24
RS07525	uracil_phosphoribosyltransferase	3089.04	-0.0572756	0.0654059	-0.875695	0.381196	0.481114
RS07530	cysteine_desulfhydrase	909.141	0.394364	0.079613	4.95351	7.28854e-07	2.57113e-06
RS07535	tRNA_(uridine(34)/cytosine(34)/5-carboxymethylaminomethyluridine(34)-2'-O)-methyltransferase_TrmL	376.515	-0.517683	0.119103	-4.34653	1.38309e-05	4.15977e-05
RS07540	amino_acid_permease	1103.35	-0.229108	0.0824474	-2.77884	0.00545539	0.0110617
RS07545	Trk_system_potassium_transport_protein_TrkA	2723.59	0.483155	0.0669046	7.22155	5.13979e-13	3.32407e-12
RS07550	Trk_system_potassium_transporter_TrkH	3015.69	0.0896879	0.066868	1.34127	0.179834	0.255669
RS07555	membrane_protein_insertion_efficiency_factor_YidD	498.737	-0.934577	0.117796	-7.93386	2.1244e-15	1.66173e-14
RS07560	ribosomal_large_subunit_pseudouridine_synthase_B	973.29	-0.892206	0.091927	-9.70559	2.85413e-22	3.38223e-21
RS07565	segregation/condensation_protein_B	467.352	-0.845128	0.105708	-7.99496	1.29616e-15	1.03016e-14
RS07570	segregation/condensation_protein_A	715.355	-0.807013	0.0922898	-8.74434	2.24327e-18	2.25352e-17
RS07575	XerD-like_tyrosine_recombinase	796.917	-0.662854	0.0894061	-7.41397	1.22578e-13	8.36489e-13
RS07580	CBS_domain-containing_protein	731.663	-0.512085	0.0890979	-5.74745	9.06007e-09	3.93199e-08
RS07585	phosphodiesterase	588.649	-0.637683	0.0949096	-6.71885	1.83169e-11	1.02111e-10
RS07590	non-canonical_purine_NTP_pyrophosphatase	1055.29	-0.521303	0.0759791	-6.86113	6.83171e-12	3.9648e-11
RS07595	glutamate_racemase	906.066	-0.486016	0.0833136	-5.83357	5.42543e-09	2.41279e-08
RS07600	hypothetical_protein	1306.88	-0.223563	0.0759341	-2.94418	0.00323816	0.00687588
RS07605	hypothetical_protein	52.4168	0.419175	0.224571	1.86656	0.0619624	0.100759
RS07610	DNA-binding_protein	492.698	0.562239	0.0928097	6.05798	1.37842e-09	6.495e-09
RS07615	membrane_protein	3793.36	0.346435	0.0628144	5.51521	3.48357e-08	1.43624e-07
RS07620	hypothetical_protein	1765.43	0.340946	0.073427	4.64333	3.42843e-06	1.11593e-05
RS07625	23S_rRNA_methyltransferase	1023.48	0.0336774	0.0906543	0.371492	0.710271	0.774877
RS07630	acylphosphatase	246.379	1.22452	0.125076	9.79015	1.24106e-22	1.50678e-21
RS07635	membrane_protein_insertase_YidC	4896.78	0.193718	0.0659155	2.93889	0.00329394	0.00697935
RS07640	amino_acid_ABC_transporter_permease	2060.13	-0.683856	0.0941192	-7.26586	3.70684e-13	2.42909e-12
RS07645	ABC_transporter_substrate-binding_protein	2225.53	-0.542371	0.103691	-5.23067	1.68896e-07	6.42779e-07
RS07650	amidase	435.724	0.981552	0.111643	8.79191	1.47043e-18	1.49999e-17
RS07655	transcription_elongation_factor_GreA	2094.96	-0.626149	0.0695726	-8.99995	2.25825e-19	2.37717e-18
RS07660	aminodeoxychorismate_lyase	5557.35	-0.573455	0.0566914	-10.1154	4.72157e-24	6.39999e-23
RS07665	N-acetyltransferase	678.025	-0.896736	0.0969265	-9.25171	2.20929e-20	2.42899e-19
RS07670	UDP-N-acetylmuramate--L-alanine_ligase	4454.26	-0.234167	0.0659024	-3.55324	0.000380518	0.000931987
RS07675	hypothetical_protein	2818.37	-0.0986062	0.0947757	-1.04042	0.298147	0.393695
RS07680	RNA_helicase	4722.57	0.460056	0.070431	6.532	6.4897e-11	3.46176e-10
RS07685	ribosome_biogenesis_GTPase_Der	2929.95	-0.490876	0.0618007	-7.94288	1.97545e-15	1.55754e-14
RS07690	primosomal_protein_DnaI	1251.8	-0.245207	0.0816707	-3.00239	0.0026787	0.00576212
RS07695	chromosome_replication_initiation_protein	1204.13	-0.0952538	0.0766107	-1.24335	0.213739	0.297881
RS07700	transcriptional_regulator_NrdR	508.005	0.0170956	0.0970961	0.176069	0.86024	0.891784
RS07705	two-component_sensor_histidine_kinase	5967.75	-0.0188449	0.0620065	-0.303918	0.76119	0.813828
RS07710	DNA-binding_response_regulator	7694.05	0.231088	0.0558475	4.13784	3.50597e-05	9.94027e-05
RS07715	hypothetical_protein	1600.19	0.778644	0.0734115	10.6066	2.7778e-26	4.19638e-25
RS07720	zinc_metalloprotease_HtpX	3661.42	0.445663	0.062344	7.14845	8.77629e-13	5.54897e-12
RS07725	membrane_protein	1778.63	0.552982	0.0760698	7.2694	3.61075e-13	2.37398e-12
RS07730	ribosomal_RNA_small_subunit_methyltransferase_G	712.42	0.184851	0.0835209	2.21322	0.0268822	0.0472467
RS07735	V-type_Na+_-ATPase_subunit_J	1823.15	-0.00952768	0.0733999	-0.129805	0.896721	0.919011
RS07740	potassium_transporter_Trk	1710.04	-0.120503	0.0755121	-1.59581	0.110532	0.168652
RS07745	cobalt_ABC_transporter_permease	1121.96	-0.337643	0.0742828	-4.54537	5.48389e-06	1.72812e-05
RS07750	heme_ABC_transporter_ATP-binding_protein	1455.38	-0.281167	0.0701643	-4.00726	6.14274e-05	0.000169075
RS07755	DUF3816_family_protein	564.786	-0.264691	0.0895185	-2.95683	0.00310818	0.00661407
RS07760	serine/threonine_transporter_SstT	3119.04	-0.368807	0.0641028	-5.75337	8.74822e-09	3.81338e-08
RS07765	branched-chain_amino_acid_transporter	657.909	-0.683413	0.0889968	-7.67908	1.60236e-14	1.20117e-13
RS07770	alcohol_dehydrogenase	582.357	-0.647425	0.0974877	-6.64109	3.11374e-11	1.71169e-10
RS07775	ABC_transporter_permease	483.074	-0.562024	0.0995188	-5.64742	1.62876e-08	6.93187e-08
RS07780	methionine_import_ATP-binding_protein_MetN	321.41	-0.531889	0.112948	-4.70914	2.4876e-06	8.24615e-06
RS07785	peptidase_M20	241.721	-0.516662	0.125511	-4.11647	3.84713e-05	0.000108609
RS07790	O-sialoglycoprotein_endopeptidase	437.167	-0.250701	0.104984	-2.388	0.0169403	0.031128
RS07795	ABC_transporter_substrate-binding_protein	642.642	0.549716	0.127987	4.29508	1.74628e-05	5.20466e-05
RS07800	glutamine_amidotransferase	203.302	0.677568	0.149049	4.54593	5.46924e-06	1.72626e-05
RS07805	transcriptional_regulator	4076.85	-0.131728	0.0665375	-1.97976	0.0477305	0.0795777
RS07810	hypothetical_protein	177.442	-0.615753	0.154319	-3.99014	6.6035e-05	0.000180751
RS07815	2-dehydropantoate_2-reductase	573.072	0.236129	0.0957855	2.46519	0.0136943	0.0256881
RS07820	hypothetical_protein	4.00462	-0.127975	0.386367	-0.331227	0.740473	0.796844
RS07825	hypothetical_protein	2.49042	-0.431017	0.366379	-1.17642	0.239426	0.326775
RS07830	hypothetical_protein	0.114155	-0.0581674	0.120672	-0.482029	0.629785	NA
RS07835	DhaKLM_operon_coactivator_DhaQ	136.364	-0.363153	0.160774	-2.25878	0.0238973	0.0423012
RS07840	dihydroxyacetone_kinase_transcriptional_activator_DhaS	48.4848	0.0849856	0.259431	0.327584	0.743226	0.798938
RS07845	dihydroxyacetone_kinase_subunit_DhaK	1069.72	-0.560636	0.213308	-2.62829	0.00858148	0.0167814
RS07850	dihydroxyacetone_kinase_subunit_L	188.121	-0.946896	0.154863	-6.11442	9.69068e-10	4.62117e-09
RS07855	PTS-dependent_dihydroxyacetone_kinase_phosphotransferase_subunit_DhaM	70.262	-0.57973	0.217842	-2.66124	0.00778538	0.0154073
RS07860	glycerol_transporter	164.093	-0.454776	0.160666	-2.83057	0.00464651	0.00960862
RS07865	cupin	6948.68	1.01092	0.0967912	10.4444	1.5549e-25	2.29638e-24
RS07870	MerR_family_transcriptional_regulator	224.587	-0.205879	0.12613	-1.63227	0.102622	0.158169
RS07875	hypothetical_protein	681.96	-0.308925	0.0846065	-3.65132	0.000260899	0.000656059
RS07880	hypothetical_protein	147.582	-0.391582	0.154532	-2.53398	0.0112774	0.021439
RS07885	SAM-dependent_methyltransferase	359.798	-0.197108	0.106868	-1.8444	0.0651246	0.105295
RS07890	ribosome_silencing_factor_RsfS	806.277	-0.254956	0.0988271	-2.57981	0.00988535	0.0190303
RS07895	cysteine_hydrolase	1083.7	-0.253093	0.0781764	-3.23747	0.00120597	0.00274955
RS07900	HD_domain-containing_protein	1026.9	-0.163566	0.0773737	-2.11398	0.0345169	0.0595025
RS07905	nicotinate-nicotinamide_nucleotide_adenylyltransferase	1190.77	-0.305854	0.078872	-3.87786	0.00010538	0.000280305
RS07910	RNA-binding_protein	807.635	-0.182144	0.0983812	-1.85141	0.0641104	0.103825
RS07915	ribosome_biogenesis_GTPase_YqeH	1699.49	-0.141326	0.0713695	-1.9802	0.0476813	0.0795757
RS07920	HAD_family_hydrolase	1118.58	-0.0303815	0.0755827	-0.401963	0.687711	0.758206
RS07925	EamA_family_transporter	236.815	-1.33151	0.133149	-10.0001	1.5217e-23	2.01853e-22
RS07930	aspartyl/glutamyl-tRNA(Asn/Gln)_amidotransferase_subunit_B	4593.54	-0.292122	0.0633527	-4.61104	4.00655e-06	1.29136e-05
RS07935	glutamyl-tRNA(Gln)_amidotransferase_subunit_A	2551.52	-0.147659	0.0659508	-2.23893	0.0251604	0.0444178
RS07940	aspartyl/glutamyl-tRNA(Asn/Gln)_amidotransferase_subunit_C	643.587	-0.146125	0.0895696	-1.63142	0.102803	0.158324
RS07945	pyruvate2C_phosphate_dikinase	447.606	0.0553182	0.097763	0.565841	0.571502	0.665687
RS07950	phosphoenolpyruvate_synthase_regulatory_protein	250.809	0.193792	0.122732	1.57898	0.11434	0.17366
RS07955	CBS_domain-containing_protein	259.12	0.380708	0.122973	3.09587	0.00196235	0.00429115
RS07960	3-hydroxybutyryl-CoA_dehydrogenase	2574.24	-0.17262	0.0927804	-1.86052	0.0628121	0.101973
RS07965	isochorismatase	302.376	0.295492	0.119038	2.48234	0.0130523	0.0245771
RS07970	GTP-sensing_pleiotropic_transcriptional_regulator_CodY	3488.44	-0.477934	0.066601	-7.17608	7.17384e-13	4.57969e-12
RS07975	aminotransferase	2857.45	-0.167573	0.0761099	-2.20172	0.0276847	0.048571
RS07980	universal_stress_protein_UspA	3168.18	0.135184	0.0692921	1.95093	0.0510651	0.0843912
RS07985	haloacid_dehalogenase	804.518	-0.0459588	0.0828771	-0.554541	0.579208	0.669932
RS07990	L-asparaginase	653.871	-0.214665	0.088446	-2.42707	0.0152212	0.0282577
RS07995	shikimate_dehydrogenase	188.352	0.83555	0.137215	6.08936	1.13366e-09	5.36724e-09
RS08000	aldo/keto_reductase	805.036	0.942879	0.0948735	9.93827	2.83698e-23	3.64571e-22
RS08005	DNA_helicase_RecG	2549.6	0.272387	0.0633622	4.29889	1.71654e-05	5.12374e-05
RS08010	CHAP_domain-containing_protein	12102.7	-0.134024	0.0566844	-2.36439	0.01806	0.0328802
RS08015	alanine_racemase	1177.45	-0.0272609	0.0720863	-0.37817	0.705304	0.770742
RS08020	holo-ACP_synthase	365.922	-0.0877506	0.107775	-0.814199	0.415531	0.517192
RS08025	phospho-2-dehydro-3-deoxyheptonate_aldolase	1262.41	-0.0853968	0.0862473	-0.990138	0.322107	0.419352
RS08030	preprotein_translocase_subunit_SecA	11461.9	-0.345286	0.0581709	-5.93571	2.9258e-09	1.33414e-08
RS08035	mannose-6-phosphate_isomerase2C_class_I	1478.33	0.288937	0.0804797	3.59018	0.000330451	0.000815414
RS08040	fructokinase	25.8479	-0.206811	0.306193	-0.675425	0.499406	0.598259
RS08045	PTS_beta-glucoside_transporter_subunit_EIIBCA	135.775	-0.396453	0.15893	-2.49452	0.0126128	0.0238402
RS08050	sucrose-6-phosphate_hydrolase	361.615	-0.187755	0.120995	-1.55176	0.120719	0.182508
RS08055	LacI_family_transcriptional_regulator	301.127	-0.178207	0.112733	-1.58079	0.113926	0.17343
RS08060	N_utilization_substance_protein_B	3168.29	-0.100737	0.0752136	-1.33934	0.18046	0.256191
RS08065	Asp23/Gls24_family_envelope_stress_response_protein	1935.67	-0.0720683	0.0766098	-0.940719	0.346849	0.446013
RS08070	elongation_factor_P	2553.21	-0.178595	0.0702334	-2.54289	0.0109941	0.0209206
RS08075	hypothetical_protein	164.73	0.335554	0.147637	2.27283	0.0230365	0.0409606
RS08080	hypothetical_protein	162.602	0.324655	0.149944	2.16518	0.0303737	0.0528203
RS08085	hypothetical_protein	228.874	0.317384	0.122415	2.59269	0.00952273	0.0184038
RS08090	hypothetical_protein	308.191	0.488673	0.109281	4.47171	7.75981e-06	2.41837e-05
RS08095	peptidase_M24_family_protein	750.702	0.573029	0.0810718	7.06817	1.56993e-12	9.70901e-12
RS08100	DUF4811_domain-containing_protein	726.079	-0.953363	0.102507	-9.30047	1.39825e-20	1.55457e-19
RS08105	MFS_transporter	692.801	-0.679994	0.105742	-6.43069	1.27022e-10	6.61517e-10
RS08110	excinuclease_ABC_subunit_A	3753.6	0.484301	0.0705288	6.86672	6.56963e-12	3.83519e-11
RS08115	membrane_protein	2995.2	0.108825	0.0627531	1.73418	0.0828866	0.131436
RS08120	magnesium_transporter	2566.57	0.355837	0.0672502	5.29124	1.21492e-07	4.72363e-07
RS08125	30S_ribosomal_protein_S18	9240.81	-0.510052	0.0759644	-6.71435	1.88905e-11	1.05012e-10
RS08130	Single-stranded_DNA-binding_protein_1	8826.22	-0.472423	0.0541834	-8.71897	2.80756e-18	2.77808e-17
RS08135	30S_ribosomal_protein_S6	5135.77	-0.479893	0.0616487	-7.78431	7.00953e-15	5.37669e-14
RS08140	A/G-specific_adenine_glycosylase	812.312	-0.308356	0.0850658	-3.62491	0.000289064	0.000718322
RS08145	transcriptional_regulator	192.314	0.00258886	0.151928	0.0170401	0.986405	0.990408
RS08150	thiol_reductase_thioredoxin	11569.6	0.623501	0.0855371	7.28925	3.11695e-13	2.06994e-12
RS08155	acid_phosphatase	526.337	-0.225002	0.0924338	-2.4342	0.0149248	0.0277857
RS08160	endonuclease_MutS2	1684.59	-0.148861	0.0695266	-2.14107	0.0322684	0.0557235
RS08165	colicin_V_production_protein	1495.76	-0.257234	0.0737532	-3.48777	0.000487063	0.00117836
RS08170	hypothetical_protein	413.981	0.0378872	0.115572	0.327823	0.743045	0.798938
RS08175	ribonuclease_HIII	1255.07	0.456623	0.0745755	6.12296	9.18546e-10	4.41214e-09
RS08180	signal_peptidase_I	1240.51	-0.0375757	0.0734958	-0.511263	0.609167	0.696845
RS08185	helicase	1324.81	0.364307	0.0796854	4.57182	4.83505e-06	1.54332e-05
RS08190	hypothetical_protein	4016.72	-0.148656	0.0717365	-2.07226	0.0382417	0.0652222
RS08195	DNA_polymerase_IV	472.764	0.053329	0.100847	0.52881	0.596937	0.687074
RS08200	formate_acetyltransferase	12405.8	-0.371065	0.103241	-3.59416	0.000325435	0.000804041
RS08205	FMN-binding_protein	427.067	-0.36704	0.135451	-2.70976	0.0067332	0.0134325
RS08210	serine_hydrolase	1971.31	0.0898081	0.0661956	1.35671	0.174874	0.250055
RS08215	peptidase	1068.25	0.20904	0.0761454	2.74528	0.00604591	0.0121842
RS08220	anion_permease	456.572	-0.660791	0.116403	-5.67673	1.3729e-08	5.88088e-08
RS08225	aquaporin	4588.22	-0.325818	0.071662	-4.5466	5.45185e-06	1.72352e-05
RS08230	universal_stress_protein_UspA	2355.23	-2.17671	0.372793	-5.83893	5.2537e-09	2.34168e-08
RS08235	MFS_transporter	2916.21	-2.08451	0.341501	-6.10397	1.03467e-09	4.92216e-09
RS08240	Crp/Fnr_family_transcriptional_regulator	626.301	0.728991	0.12816	5.68813	1.28438e-08	5.52562e-08
RS08245	Xaa-Pro_dipeptidyl-peptidase	1977.68	0.397935	0.0889837	4.472	7.74918e-06	2.41837e-05
RS08250	hypothetical_protein	353.075	0.123371	0.118689	1.03944	0.298598	0.39395
RS08255	geranylgeranyl_pyrophosphate_synthase	2807.8	-0.0781822	0.0713612	-1.09558	0.273261	0.367131
RS08260	amino_acid_ABC_transporter_ATP-binding_protein	2078.92	0.105447	0.0694913	1.51742	0.129162	0.193644
RS08265	thiol_reductant_ABC_exporter_subunit_CydD	2694.11	0.0600642	0.080985	0.74167	0.458287	0.559156
RS08270	cytochrome_c_oxidase_assembly_protein	5477.89	-0.11791	0.0853356	-1.38172	0.167056	0.241141
RS08275	cytochrome_ubiquinol_oxidase_subunit_I	6641.47	-0.211181	0.0847158	-2.49282	0.0126732	0.0239315
RS08280	NADH_dehydrogenase	5188.89	-0.371546	0.0943052	-3.93983	8.15398e-05	0.000221658
RS08285	12C4-dihydroxy-2-naphthoate_octaprenyltransferase	5452.2	-0.445973	0.0871428	-5.11772	3.09252e-07	1.14824e-06
RS08290	hypothetical_protein	147.485	0.559601	0.150697	3.71342	0.000204476	0.000520125
RS08295	nucleoid-associated_protein2C_YbaB/EbfC_family	3055.15	0.00100952	0.078938	0.0127887	0.989796	0.992806
RS08300	cyclopropane-fatty-acyl-phospholipid_synthase	3015.96	0.492986	0.0728381	6.76824	1.3036e-11	7.37093e-11
RS08305	MerR_family_transcriptional_regulator	362.414	-0.571385	0.111039	-5.1458	2.66384e-07	9.9655e-07
RS08310	3'-5'_exonuclease	95.8166	-0.275291	0.181579	-1.5161	0.129495	0.193851
RS08315	hypothetical_protein	544.404	-0.580917	0.0980259	-5.92616	3.10097e-09	1.41077e-08
RS08320	aminoacetone_oxidase_family_FAD-binding_enzyme	1658.91	-0.473878	0.079069	-5.99322	2.05729e-09	9.51257e-09
RS08325	DUF4931_domain-containing_protein	146.138	-0.0675209	0.14802	-0.45616	0.648275	0.728114
RS08330	30S_ribosomal_protein_S14	588.94	-0.219388	0.106906	-2.05216	0.0401543	0.0680687
RS08335	amino_acid_lyase	479.462	0.719234	0.102465	7.01934	2.22919e-12	1.3616e-11
RS08340	tRNA_(adenosine(37)-N6)-threonylcarbamoyltransferase_complex_transferase_subunit_TsaD	1565.45	-0.426058	0.0709734	-6.00307	1.93626e-09	8.99496e-09
RS08345	ribosomal-protein-alanine_N-acetyltransferase_RimI	479.111	-0.157817	0.0959489	-1.64481	0.10001	0.154624
RS08350	tRNA_(adenosine(37)-N6)-threonylcarbamoyltransferase_complex_dimerization_subunit_type_1_TsaB	711.298	-0.0402486	0.0831124	-0.484267	0.628196	0.711282
RS08355	hypothetical_protein	758.014	0.150148	0.0824369	1.82138	0.0685498	0.110562
RS08360	ribonuclease_J	7675.8	-0.195796	0.0543229	-3.6043	0.000312994	0.000774269
RS08365	CHAP_domain-containing_protein	361	0.0975229	0.108982	0.894853	0.370866	0.4709
RS08370	type_I_glutamate--ammonia_ligase	12351.2	0.116203	0.0653968	1.77688	0.0755874	0.121123
RS08375	MerR_family_transcriptional_regulator	4448.49	0.223527	0.0681733	3.2788	0.00104248	0.00240451
RS08380	FUSC_family_protein	532.305	0.663706	0.100333	6.61502	3.71493e-11	2.01421e-10
RS08385	phosphoglycerate_kinase	39680.1	0.291194	0.0609776	4.77543	1.79323e-06	6.03538e-06
RS08390	5'-nucleotidase2C_lipoprotein_e(P4)_family	1051.99	1.41407	0.0780776	18.111	2.60824e-73	2.86762e-71
RS08395	type_I_glyceraldehyde-3-phosphate_dehydrogenase	88052.5	0.0953561	0.0661429	1.44167	0.149396	0.219328
RS08400	elongation_factor_G	33570	-0.384724	0.0508283	-7.5691	3.75828e-14	2.71446e-13
RS08405	30S_ribosomal_protein_S7	6493.34	-0.714549	0.0576634	-12.3917	2.89781e-35	7.2592e-34
RS08410	30S_ribosomal_protein_S12	7869.37	-0.677399	0.0692263	-9.78528	1.30231e-22	1.5715e-21
RS08415	pur_operon_repressor	2382.18	-0.417805	0.0786663	-5.31111	1.0896e-07	4.24471e-07
RS08420	3'-5'_exoribonuclease_YhaM	1218.31	-0.252634	0.0731668	-3.45285	0.000554706	0.00132901
RS08425	DNA_recombination_protein_RmuC	1115.62	-0.262706	0.0790727	-3.32234	0.000892658	0.00208322
RS08430	thiamine_pyrophosphokinase	478.963	-0.296426	0.0970739	-3.05361	0.00226109	0.00491724
RS08435	ribulose-phosphate_3-epimerase	905.864	-0.199738	0.080678	-2.47574	0.0132961	0.0250124
RS08440	ribosome_small_subunit-dependent_GTPase_A	1370.63	0.0535891	0.0731551	0.732541	0.463839	0.564537
RS08445	rRNA_(guanine-N1)-methyltransferase	1241.64	-0.154526	0.0713194	-2.16668	0.0302591	0.0526673
RS08450	16S_rRNA_(adenine(1518)-N(6)/adenine(1519)-N(6))-dimethyltransferase	1312.63	0.0398449	0.0708341	0.56251	0.573769	0.666367
RS08455	hypothetical_protein	727.232	0.224663	0.0877579	2.56003	0.0104663	0.0200123
RS08460	ribonuclease_M5	386.728	0.110215	0.109513	1.00642	0.314215	0.41072
RS08465	TatD_family_hydrolase	699.886	0.27387	0.0892701	3.06789	0.00215579	0.00469341
RS08470	hypothetical_protein	314.13	-0.170819	0.118918	-1.43644	0.150877	0.220847
RS08475	hypothetical_protein	191.689	0.0480109	0.135248	0.354985	0.722601	0.783577
RS08480	hypothetical_protein	414.69	-0.068391	0.0996417	-0.686369	0.49248	0.591036
RS08485	hypothetical_protein	106.326	0.102183	0.168728	0.605607	0.544776	0.641351
RS08490	D-alanyl-lipoteichoic_acid_biosynthesis_protein_DltD	6915.55	0.110708	0.0795965	1.39086	0.164268	0.238072
RS08495	D-alanine--poly(phosphoribitol)_ligase_subunit_2	766.62	0.36927	0.0826439	4.46821	7.88769e-06	2.45436e-05
RS08500	D-alanyl-lipoteichoic_acid_biosynthesis_protein_DltB	3588.34	0.274346	0.0678427	4.04384	5.25817e-05	0.000145537
RS08505	D-alanine--poly(phosphoribitol)_ligase	3585.14	0.27923	0.0746475	3.74065	0.000183545	0.000471124
RS08510	teichoic_acid_D-Ala_incorporation-associated_protein_DltX	310.183	0.318501	0.11242	2.83315	0.00460919	0.0095414
RS08515	two-component_sensor_histidine_kinase	1665.23	-0.0179293	0.0716137	-0.250361	0.802308	0.847714
RS08520	DNA-binding_response_regulator	1257.26	-0.0299988	0.0793284	-0.378159	0.705312	0.770742
RS08525	50S_ribosomal_protein_L34	31922	0.0596499	0.0577454	1.03298	0.301613	0.397663
RS08530	membrane_protein	1027.74	-0.357427	0.0814329	-4.38922	1.13756e-05	3.48397e-05
RS08535	transposase	49.7666	0.0537638	0.229438	0.234328	0.81473	0.857178
RS08540	glycine/betaine_ABC_transporter_permease	3179.31	-0.666219	0.0931252	-7.15402	8.42712e-13	5.34528e-12
RS08545	glycine/betaine_ABC_transporter_ATP-binding_protein	1969.35	-0.789088	0.0915141	-8.62259	6.54555e-18	6.31885e-17
RS08550	phosphoketolase	45.3708	-0.260947	0.243959	-1.06963	0.284785	0.379267
RS08555	L-ascorbate-6-phosphate_lactonase	157.706	-1.00475	0.155356	-6.46742	9.9692e-11	5.24709e-10
RS08560	L-ascorbate-6-phosphate_lactonase	999.823	-0.215904	0.0953994	-2.26316	0.0236259	0.0418583
RS08565	hypothetical_protein	5.05449	-0.281643	0.389415	-0.723247	0.469528	0.570409
RS08570	carbohydrate_kinase	5.69146	-0.0113183	0.389346	-0.02907	0.976809	0.983768
RS08575	amidohydrolase	11.1709	0.111843	0.373283	0.299619	0.764468	0.81557
RS08580	PTS_galactitol_transporter_subunit_IIC	14.7494	0.00176533	0.370175	0.00476891	0.996195	0.997203
RS08585	dihydrofolate_reductase	71.4311	-0.20211	0.212546	-0.950897	0.341657	0.440768
RS08590	hypothetical_protein	25.4656	-0.289096	0.296216	-0.975964	0.329082	0.427332
RS08595	LacI_family_transcriptional_regulator	199.492	-0.588124	0.15712	-3.74315	0.000181731	0.000467679
RS08600	transaldolase	24.9992	0.370199	0.298944	1.23835	0.215585	0.300029
RS08605	L-ribulose-5-phosphate_4-epimerase	13.4169	0.582971	0.349558	1.66774	0.0953679	0.148726
RS08610	L-xylulose_5-phosphate_3-epimerase	18.122	0.179816	0.342205	0.525463	0.599262	0.689099
RS08615	3-keto-L-gulonate-6-phosphate_decarboxylase	7.46681	0.208147	0.384947	0.540717	0.588703	0.679892
RS08620	PTS_ascorbate_transporter_subunit_IIA	4.80863	0.173203	0.389116	0.44512	0.656233	0.734966
RS08625	PTS_ascorbate_transporter_subunit_IIB	18.449	-0.00223253	0.320529	-0.00696513	0.994443	0.995952
RS08630	PTS_ascorbate_transporter_subunit_IIC	185.543	-1.28512	0.172144	-7.46535	8.30801e-14	5.7488e-13
RS08635	hypothetical_protein	1890.51	-0.228725	0.0719182	-3.18035	0.00147096	0.00328558
RS08645	adenylosuccinate_synthetase	5606.67	-0.14766	0.101643	-1.45273	0.146298	0.215259
RS08650	transcriptional_regulator	687.868	-0.32737	0.100864	-3.24566	0.0011718	0.00267474
RS08655	DNA-binding_protein	570.41	-0.468549	0.094177	-4.9752	6.51813e-07	2.31172e-06
RS08660	bifunctional_glutamate--cysteine_ligase/glutathione_synthetase	3884.46	0.470966	0.0613094	7.68179	1.56881e-14	1.18049e-13
RS08665	hypothetical_protein	685.694	0.643854	0.0847221	7.5996	2.97058e-14	2.17733e-13
RS08670	hypothetical_protein	1730.84	0.447002	0.0711722	6.28057	3.37343e-10	1.67739e-09
RS08675	molecular_chaperone_Hsp33	1115.55	-0.345851	0.0792562	-4.3637	1.27878e-05	3.86959e-05
RS08680	tRNA_dihydrouridine_synthase_DusB	2205.48	-0.31419	0.0655948	-4.78987	1.6689e-06	5.64573e-06
RS08685	deoxyadenosine_kinase	891.006	-0.626587	0.0789718	-7.93431	2.11671e-15	1.66173e-14
RS08690	N-acetyltransferase	761.221	-0.681702	0.082967	-8.21654	2.09456e-16	1.79443e-15
RS08695	chaperone_protein_ClpB	5673.97	0.0772943	0.0605392	1.27677	0.201685	0.282473
RS08700	CtsR_family_transcriptional_regulator	631.761	0.262336	0.0933085	2.81149	0.00493129	0.0101235
RS08705	hypothetical_protein	1283.52	0.674336	0.0762579	8.84284	9.33144e-19	9.61819e-18
RS08710	elongation_factor_Ts	7856.99	-0.444004	0.0639547	-6.94248	3.85264e-12	2.2896e-11
RS08715	30S_ribosomal_protein_S2	9870.71	-0.500377	0.061209	-8.17489	2.96143e-16	2.46247e-15
RS08720	peroxiredoxin	6029.57	0.257539	0.0584161	4.4087	1.03994e-05	3.20069e-05
RS08725	alkyl_hydroperoxide_reductase_subunit_F	11157.4	0.159052	0.0595031	2.67301	0.0075175	0.014892
RS08735	sodium_hydrogen_antiporter	1318.24	0.647615	0.0794718	8.14899	3.66966e-16	3.02594e-15
RS08740	hypothetical_protein	162.055	0.844645	0.161331	5.23548	1.6456e-07	6.28697e-07
RS08745	LD-carboxypeptidase	1375.29	1.34875	0.0910912	14.8066	1.32756e-49	5.97102e-48
RS08750	endopeptidase	765.558	-0.511108	0.087425	-5.84625	5.02793e-09	2.24611e-08
RS08755	oxidoreductase	4298.16	0.703233	0.062719	11.2124	3.54301e-29	6.67773e-28
RS08760	MFS_transporter	814.782	-0.0846223	0.0971806	-0.870773	0.383878	0.483266
RS08765	Crp/Fnr_family_transcriptional_regulator	605.306	0.377355	0.0912147	4.137	3.51873e-05	9.96219e-05
RS08770	peptide_deformylase	1965.55	-0.30152	0.0735256	-4.10089	4.11571e-05	0.000115368
RS08775	transcriptional_regulator	1072.96	0.273329	0.0784917	3.48227	0.000497187	0.00119992
RS08780	oligohyaluronate_lyase	32.7903	-0.334559	0.270939	-1.23481	0.2169	0.301437
RS08785	PTS_N-acetylglucosamine_transporter_subunit_IIBC	18.5396	-0.236145	0.327248	-0.721608	0.470535	0.571282
RS08790	PTS_N-acetylgalactosamine_transporter_subunit_IIC	12.4799	-0.154608	0.355319	-0.435124	0.663473	0.740142
RS08795	PTS_N-acetylgalactosamine_transporter_subunit_IIB	6.99438	0.202549	0.387362	0.522893	0.601048	0.689864
RS08800	glucuronyl_hydrolase	20.2115	-0.181282	0.321005	-0.564733	0.572255	0.66606
RS08805	PTS_mannose_transporter_subunit_IIA	7.97118	-0.523484	0.381164	-1.37338	0.169633	0.244046
RS08810	gluconate_5-dehydrogenase	184.465	-0.491119	0.148493	-3.30735	0.000941838	0.00218511
RS08815	hypothetical_protein	74.3205	-0.495881	0.207888	-2.38533	0.0170639	0.0313071
RS08820	2-keto-3-deoxygluconate_kinase	115.472	-0.439324	0.168091	-2.61361	0.00895902	0.0173993
RS08825	bifunctional_2-keto-4-hydroxyglutarate_aldolase/2-keto-3-deoxy-6-phosphogluconate_aldolase	57.8	-0.380739	0.223473	-1.70374	0.0884304	0.139002
RS08830	hypothetical_protein	208.496	-0.276678	0.147859	-1.87123	0.0613128	0.0999489
RS08835	hypothetical_protein	708.955	-0.240354	0.118882	-2.02179	0.0431977	0.0728179
RS08840	MarR_family_transcriptional_regulator	230.652	-0.96011	0.138776	-6.9184	4.56761e-12	2.69027e-11
RS08845	DNA_polymerase_III_subunit_alpha	3301.5	-0.537259	0.0659823	-8.14247	3.8729e-16	3.18028e-15
RS08850	N-acetylmuramoyl-L-alanine_amidase	810.23	1.20766	0.0903679	13.3638	9.84169e-41	3.09154e-39
RS08855	proline--tRNA_ligase	4173.63	-0.101201	0.0607912	-1.66473	0.0959663	0.149423
RS08860	RIP_metalloprotease_RseP	1825.35	0.0133106	0.0670815	0.198424	0.842713	0.879141
RS08865	phosphatidate_cytidylyltransferase	1450.59	0.0628232	0.0713832	0.880084	0.378814	0.47896
RS08870	isoprenyl_transferase	767.221	0.245597	0.0839032	2.92714	0.00342093	0.0072175
RS08875	preprotein_translocase_subunit_YajC	9445.65	0.141206	0.0767528	1.83975	0.0658052	0.106309
RS08880	thiol_reductase_thioredoxin	722.595	0.533627	0.0938551	5.68565	1.30316e-08	5.59428e-08
RS08885	malate_dehydrogenase	24.8608	-0.0962286	0.296163	-0.324917	0.745244	0.800237
RS08890	L-malate_permease	16.3097	0.0172841	0.331617	0.0521208	0.958432	0.969207
RS08895	histidine_kinase	287.013	0.0325137	0.128047	0.253921	0.799557	0.84571
RS08900	two-component_system_response_regulator_DcuR	147.301	0.158503	0.149194	1.06239	0.288058	0.383109
RS08905	UDP-glucose_4-epimerase_GalE	2690.26	0.460872	0.0724371	6.36238	1.9865e-10	1.02111e-09
RS08910	glucohydrolase	208.426	0.113083	0.145767	0.77578	0.437879	0.540611
RS08915	ABC_transporter_ATP-binding_protein	1839.89	-0.205545	0.0903557	-2.27484	0.0229153	0.0408185
RS08920	Fis_family_transcriptional_regulator	368.076	0.0988174	0.110451	0.894674	0.370961	0.4709
RS08925	protein_lacX	160.893	-0.406675	0.158146	-2.57152	0.0101254	0.0194356
RS08930	tagatose_12C6-diphosphate_aldolase	111.426	-0.0739749	0.165146	-0.447935	0.6542	0.733104
RS08935	tagatose-6-phosphate_kinase	104.113	-0.140101	0.179028	-0.782566	0.433882	0.536657
RS08950	galactose-6-phosphate_isomerase	22.6027	-0.24965	0.317215	-0.787006	0.431278	0.533771
RS08955	galactose-6-phosphate_isomerase_subunit_LacA	10.1497	0.162203	0.371076	0.437114	0.662029	0.739783
RS08960	hypothetical_protein	533.46	-0.639224	0.101489	-6.29846	3.00623e-10	1.50616e-09
RS08965	PTS_mannose_transporter_subunit_IIC	14.9913	0.237365	0.338872	0.700458	0.483641	0.583258
RS08970	PTS_fructose_transporter_subunit_IIB	5.8676	-0.291508	0.388288	-0.750752	0.452802	0.554866
RS08975	PTS_galactose_transporter_subunit_IIA	6.60708	-0.268037	0.388145	-0.690561	0.489842	0.588941
RS08980	DeoR_family_transcriptional_regulator	800.104	0.639376	0.0841829	7.59509	3.0759e-14	2.2462e-13
RS08985	histidine_triad_protein	20.613	0.0340231	0.310315	0.109641	0.912694	0.932484
RS08990	adhesion_protein	6.21415	0.536431	0.38782	1.3832	0.166604	0.240664
RS08995	D-tyrosyl-tRNA(Tyr)_deacylase	910.682	-0.372031	0.0866909	-4.29146	1.77501e-05	5.28233e-05
RS09000	GTP_pyrophosphokinase	1910.07	-0.295779	0.0684235	-4.32277	1.54083e-05	4.61316e-05
RS09005	2'2C3'-cyclic-nucleotide_2'-phosphodiesterase	206.372	-1.15608	0.137684	-8.39666	4.59348e-17	4.18917e-16
RS09010	class_Ib_ribonucleoside-diphosphate_reductase_assembly_flavoprotein_NrdI	436.608	0.48172	0.102381	4.70515	2.53677e-06	8.39071e-06
RS09015	peptidase_M42	1425.01	0.401323	0.0856421	4.68604	2.78536e-06	9.15653e-06
RS09020	zeta_toxin	1003.35	0.253908	0.0764325	3.32198	0.000893795	0.00208342
RS09030	iron_ABC_transporter_substrate-binding_protein	203.549	-0.0186392	0.132815	-0.140339	0.888392	0.913788
RS09035	DNA-binding_response_regulator	115.54	-0.234917	0.173527	-1.35378	0.175808	0.250846
RS09040	sensor_histidine_kinase	224.228	0.0107619	0.126311	0.0852022	0.932101	0.94788
RS09045	PTS_mannose_transporter_subunit_IID	17.4393	-0.422561	0.35189	-1.20083	0.229816	0.316058
RS09050	PTS_mannose_transporter_subunit_IIC	14.0013	-0.255038	0.349091	-0.730578	0.465037	0.565648
RS09055	PTS_sorbose_transporter_subunit_IIB	19.8926	-0.383418	0.334217	-1.14721	0.251294	0.340391
RS09060	PTS_mannose_transporter_subunit_IIA	31.0222	0.21015	0.28473	0.738069	0.460472	0.56113
RS09065	alanine_racemase	92.2215	0.123116	0.193025	0.637825	0.523587	0.619934
RS09070	membrane_protein	239.527	-0.417299	0.130318	-3.20217	0.00136399	0.00306393
RS09075	ABC_transporter_ATP-binding_protein	105.817	-0.247712	0.173483	-1.42787	0.153328	0.223939
RS09080	hypothetical_protein	42.4042	-0.402269	0.246202	-1.6339	0.102281	0.157766
RS09085	ABC_transporter_ATP-binding_protein	5.50456	-0.0642797	0.388987	-0.165249	0.868748	0.89872
RS09090	TCS_sensor_kinase	165.264	-0.354434	0.163947	-2.16189	0.0306268	0.053167
RS09095	DNA-binding_response_regulator	47.899	-0.536739	0.235611	-2.27807	0.0227225	0.0405115
RS09100	RgfB_protein	74.0356	-0.22142	0.19837	-1.1162	0.264338	0.356839
RS09105	PTS_glucose_transporter_subunit_IIABC	208.1	-0.55523	0.132333	-4.19572	2.72006e-05	7.89295e-05
RS09110	histidine_kinase	715.738	0.449783	0.0889954	5.05401	4.3264e-07	1.56525e-06
RS09115	DNA-binding_response_regulator	175.261	0.552193	0.140546	3.92892	8.53277e-05	0.00023132
RS09120	phosphate_transport_system_regulatory_protein_PhoU	34.3467	0.434864	0.269817	1.6117	0.107027	0.164318
RS09125	phosphate_ABC_transporter_ATP-binding_protein	17.844	0.331166	0.322811	1.02588	0.304946	0.400723
RS09130	phosphate_ABC_transporter2C_permease_protein_PstA	41.7564	0.675057	0.254149	2.65615	0.00790392	0.0156262
RS09135	phosphate_ABC_transporter_permease_subunit_PstC	22.1723	0.530119	0.310708	1.70616	0.0879776	0.138522
RS09140	phosphate-binding_protein	27.7251	0.880329	0.288623	3.0501	0.00228766	0.00495869
RS09145	thymidylate_kinase	955.61	0.0944315	0.0792466	1.19162	0.233412	0.319669
RS09150	16S_rRNA_(uracil(1498)-N(3))-methyltransferase	442.623	0.0430919	0.0980451	0.439511	0.660292	0.738258
RS09155	50S_ribosomal_protein_L11_methyltransferase	440.084	0.280353	0.0992824	2.8238	0.00474583	0.00978332
RS09160	hypothetical_protein	362.896	0.342599	0.106969	3.20279	0.00136104	0.00306389
RS09165	MerR_family_transcriptional_regulator	330.849	0.76864	0.112273	6.84615	7.58614e-12	4.38976e-11
RS09170	N-acetyltransferase	636.071	0.370234	0.0910376	4.06683	4.76573e-05	0.00013265
RS09175	DNA_mismatch_repair_protein_MutT	285.09	0.242673	0.118474	2.04831	0.0405293	0.0684948
RS09180	hypothetical_protein	373.889	0.215174	0.107452	2.00251	0.0452298	0.07592
RS09185	N-acetyltransferase	217.66	0.104565	0.129289	0.80877	0.418648	0.520744
RS09190	recombinase_RarA	747.347	-0.111852	0.0833246	-1.34236	0.179479	0.255348
RS09200	site-specific_integrase	227.422	0.0610491	0.127857	0.477481	0.633019	0.714234
RS09205	hypothetical_protein	6.82588	0.183701	0.384741	0.477466	0.63303	0.714234
RS09210	hypothetical_protein	126.161	-0.280191	0.184139	-1.52163	0.128103	0.192202
RS09215	cell_wall_anchor	11.2539	0.850272	0.369853	2.29895	0.0215079	0.0385544
RS09220	hypothetical_protein	4.06233	-0.271844	0.387038	-0.70237	0.482448	0.582885
RS09225	amidase	6.18116	0.377456	0.388514	0.971538	0.331281	0.429623
RS09235	hypothetical_protein	65.6401	0.0603287	0.240377	0.250975	0.801833	0.847664
RS09240	conjugal_transfer_protein	51.5071	-0.251177	0.234765	-1.06991	0.284661	0.379267
RS09245	conjugal_transfer_protein	6.41061	-0.119728	0.387138	-0.309263	0.757121	0.810695
RS09250	hypothetical_protein	1.82262	-0.0944178	0.34194	-0.276124	0.782453	NA
RS09255	conjugal_transfer_protein	7.37799	-0.0597556	0.385015	-0.155203	0.876661	0.905486
RS09260	Txe/YoeB_family_addiction_module_toxin	195.067	0.517632	0.137483	3.76507	0.000166505	0.000431299
RS09265	prevent-host-death_protein	215.258	0.673235	0.135573	4.96587	6.83955e-07	2.42137e-06
RS09270	hypothetical_protein	1.02481	-0.0869951	0.286717	-0.303418	0.761571	NA
RS09275	hypothetical_protein	1.98383	-0.0146172	0.350928	-0.0416531	0.966775	NA
RS09280	hypothetical_protein	13.7879	0.693085	0.3508	1.97573	0.0481856	0.0802012
RS09285	hypothetical_protein	1602.34	0.17797	0.0698543	2.54774	0.0108425	0.0206518
RS09290	transporter	2108.82	0.258245	0.071158	3.62918	0.000284326	0.00070956
RS09295	transcriptional_regulator	1.89209	0.165086	0.341165	0.483889	0.628464	NA
RS09300	hypothetical_protein	2.46417	0.114924	0.365622	0.314325	0.753275	NA
RS09305	Cro/Cl_family_transcriptional_regulator	6.72004	-0.468883	0.388321	-1.20746	0.227254	0.313405
RS09310	cell_division_protein_FtsK	6.0486	-0.210073	0.388661	-0.540503	0.58885	0.679892
RS09315	hypothetical_protein	3.45138	-0.0506239	0.376889	-0.13432	0.893149	0.917156
RS09320	hypothetical_protein	0.432239	-0.0213888	0.208874	-0.1024	0.918439	NA
RS09325	cell_wall_surface_anchor_protein	9.0072	-0.480212	0.376331	-1.27603	0.201943	0.282635
RS09330	hypothetical_protein	26.1538	-0.0943775	0.301453	-0.313075	0.754224	0.808126
RS09335	hypothetical_protein	3.31776	-0.134761	0.366166	-0.368034	0.712848	0.776832
RS09340	hypothetical_protein	1.64751	-0.185293	0.336459	-0.550713	0.58183	NA
RS09345	hypothetical_protein	2.04939	0.187069	0.340343	0.54965	0.582559	NA
RS09350	transcriptional_regulator	3.15398	0.260272	0.377764	0.688981	0.490835	0.589738
RS09355	transcriptional_regulator	389.493	0.344977	0.109353	3.15472	0.00160652	0.00356824
RS09360	transcriptional_regulator	377.096	0.159361	0.10684	1.49158	0.135808	0.201624
RS09365	hypothetical_protein	1006.33	-0.0484054	0.0780061	-0.620534	0.534906	0.631988
RS09370	hypothetical_protein	344.785	0.475425	0.125748	3.78076	0.000156349	0.000407124
RS09375	hypothetical_protein	160.168	0.467082	0.15152	3.08264	0.00205175	0.00447183
RS09380	XRE_family_transcriptional_regulator	95.7318	0.327271	0.186224	1.7574	0.078849	0.125638
RS09385	hypothetical_protein	1758.13	-0.0153968	0.0686852	-0.224165	0.822629	0.864109
RS09390	ISL3_family_transposase	94.5146	0.187408	0.17959	1.04353	0.296702	0.392496
RS09395	mercury(II)_reductase	130.125	0.440186	0.159885	2.75315	0.00590256	0.0119317
RS09400	Hg(II)-responsive_transcriptional_regulator	48.131	0.365367	0.238609	1.53123	0.125712	0.189486
RS09405	manganese_transporter	1370.81	0.00778313	0.0737724	0.105502	0.915978	0.934372
RS09410	ABC_transporter_permease	393.743	0.0506745	0.125866	0.402606	0.687238	0.758107
RS09415	ABC_transporter_ATP-binding_protein	207.477	-0.0992859	0.129351	-0.767567	0.442744	0.545913
RS09420	YydF_family_exported_signaling_peptide	271.491	-0.0060621	0.146745	-0.0413106	0.967048	0.975925
RS09425	hypothetical_protein	55.5604	-0.293866	0.222941	-1.31814	0.187458	0.265365
RS09430	YydG_family_peptide_radical_SAM_peptide_maturase	46.3065	-0.19536	0.260645	-0.749525	0.453541	0.554866
RS09435	hypothetical_protein	330.764	0.526961	0.121558	4.33506	1.45718e-05	4.36933e-05
RS09440	hypothetical_protein	309.126	0.554203	0.113358	4.88894	1.0138e-06	3.48925e-06
RS09445	hypothetical_protein	895.87	0.56547	0.0809801	6.98283	2.89284e-12	1.74541e-11
RS09450	hypothetical_protein	306.032	0.517223	0.11214	4.61231	3.98219e-06	1.28561e-05
RS09455	hypothetical_protein	377.657	0.490501	0.102975	4.76333	1.90428e-06	6.37659e-06
RS09460	hypothetical_protein	320.84	0.438536	0.109683	3.99821	6.38231e-05	0.000175425
RS09465	hypothetical_protein	203.523	0.550085	0.141878	3.87715	0.000105685	0.000280739
RS09470	streptomycin_resistance_protein	445.325	0.386027	0.0983833	3.92371	8.71966e-05	0.000236063
RS09475	hypothetical_protein	86.5825	0.375316	0.188132	1.99496	0.0460467	0.0770299
RS09480	hypothetical_protein	115.656	0.243624	0.16318	1.49297	0.135444	0.201503
RS09485	PadR_family_transcriptional_regulator	58.5064	0.520862	0.223933	2.32597	0.0200201	0.0361164
RS09490	N-acetyltransferase	148.294	0.545759	0.153761	3.5494	0.000386117	0.00094453
RS09495	ABC_transporter_permease	125.202	0.281241	0.160131	1.75632	0.0790334	0.12583
RS09500	ABC_transporter_ATP-binding_protein	139.655	0.173721	0.171838	1.01096	0.312036	0.408142
RS09505	hypothetical_protein	32.0532	0.331708	0.268539	1.23523	0.216744	0.301431
RS09510	transcriptional_regulator	213.672	0.496998	0.135867	3.65797	0.00025422	0.000640893
RS09525	PAP2_family_phosphoesterase	138.807	2.24156	0.16659	13.4555	2.85771e-41	9.27115e-40
RS09530	hypothetical_protein	69.0468	0.609105	0.203494	2.99324	0.00276036	0.00591848
RS09535	Rossman_fold_protein2C_TIGR00730_family	221.036	0.571596	0.154551	3.69843	0.000216938	0.000550411
RS09540	CPBP_family_intramembrane_metalloprotease	524.216	0.823335	0.116432	7.0714	1.53383e-12	9.51552e-12
RS09545	rhodanese	1576.04	-0.967894	0.111623	-8.67111	4.27918e-18	4.19233e-17
RS09550	hypothetical_protein	3063.26	-0.796923	0.0954409	-8.34991	6.83163e-17	6.11755e-16
RS09555	topology_modulation_protein	222.265	0.542168	0.124693	4.34801	1.37376e-05	4.13801e-05
RS09560	glycerol_dehydrogenase	293.859	-0.186974	0.116406	-1.60622	0.108226	0.165646
RS09565	cyclic_nucleotide-binding_protein	795.536	4.92352	0.127141	38.7248	0	0
RS09570	bifunctional_homocysteine_S-methyltransferase/methylenetetrahydrofolate_reductase	75.1387	-0.652917	0.199986	-3.26482	0.00109533	0.00250887
RS09575	5-methyltetrahydropteroyltriglutamate--homocysteine_S-methyltransferase	59.6541	-0.509687	0.227899	-2.23646	0.0253219	0.0446631
RS09580	branched-chain_amino_acid_transporter	105.742	-0.683051	0.180652	-3.78103	0.000156182	0.000407124
RS09585	branched-chain_amino_acid_transporter_AzlC	102.311	-0.357487	0.182338	-1.96057	0.0499287	0.0827546
RS09590	hypothetical_protein	141.953	-0.512262	0.159834	-3.20497	0.00135077	0.00305506
RS09595	DNA-binding_response_regulator	294.044	0.899577	0.111638	8.05802	7.75427e-16	6.23809e-15
RS09600	two-component_sensor_histidine_kinase	696.208	0.716028	0.0928624	7.71064	1.25187e-14	9.49218e-14
RS09605	hypothetical_protein	550.388	0.820298	0.0901521	9.09905	9.11271e-20	9.74814e-19
RS09610	leucine--tRNA_ligase	4684.33	-0.159994	0.0598	-2.67548	0.00746216	0.0147972
RS09615	transposase	62.84	0.0147435	0.218528	0.0674675	0.94621	0.959297
RS09620	MFS_transporter	334.113	-0.220703	0.14081	-1.56737	0.117027	0.177469
RS09625	patatin_family_protein	653.569	0.374871	0.0901766	4.15708	3.22341e-05	9.21838e-05
RS09630	hypothetical_protein	883.157	-0.147953	0.0880978	-1.67942	0.09307	0.145589
RS09635	hypothetical_protein	1399.85	-0.286349	0.0704801	-4.06283	4.84814e-05	0.000134754
RS09640	transcription_termination/antitermination_protein_NusG	3076.68	0.194766	0.0659479	2.95334	0.00314359	0.00668225
RS09645	pathogenicity_protein	66.3411	-0.310091	0.207993	-1.49087	0.135995	0.20175
RS09650	preprotein_translocase_subunit_SecE	1247.33	0.612752	0.0994159	6.16352	7.11469e-10	3.44254e-09
RS09655	50S_ribosomal_protein_L33	722.011	0.562881	0.0878407	6.40798	1.47461e-10	7.65945e-10
RS09660	penicillin-binding_protein_2A	2210.82	0.227697	0.0782137	2.91122	0.00360024	0.0075716
RS09665	RNA_pseudouridine_synthase	481.787	-0.27949	0.102084	-2.73785	0.00618426	0.0124124
RS09670	hypothetical_protein	1078.68	0.808429	0.0805441	10.0371	1.04718e-23	1.40025e-22
RS09675	phosphopentomutase	1794.06	0.834837	0.0723176	11.544	7.9131e-31	1.63125e-29
RS09680	2-deoxyribose-5-phosphate_aldolase	1427.26	0.393612	0.0767462	5.12875	2.91673e-07	1.085e-06
RS09685	hypothetical_protein	2913.64	0.583985	0.070724	8.25724	1.49079e-16	1.29968e-15
RS09690	uridine_phosphorylase	1102.75	0.817824	0.0787836	10.3806	3.03741e-25	4.38762e-24
RS09695	GntR_family_transcriptional_regulator	459.296	0.908105	0.105889	8.57598	9.82491e-18	9.43859e-17
RS09700	hypothetical_protein	161.431	1.01483	0.149794	6.77488	1.24506e-11	7.06007e-11
RS09705	molecular_chaperone_GroEL	7278.69	0.645686	0.0670454	9.63059	5.93898e-22	6.91367e-21
RS09710	co-chaperone_GroES	1236.3	0.50835	0.0751174	6.76741	1.31106e-11	7.39199e-11
RS09715	ABC_transporter_ATP-binding_protein	216.199	-0.691563	0.134505	-5.14156	2.72467e-07	1.01738e-06
RS09730	haloacid_dehalogenase	199.465	-0.219542	0.136548	-1.6078	0.10788	0.165243
RS09735	glyoxalase	33.9812	0.562796	0.271959	2.06942	0.0385072	0.0654688
RS09740	peroxide_stress_protein_YaaA	370.44	-0.154175	0.104592	-1.47407	0.140463	0.207444
RS09745	anaerobic_ribonucleoside-triphosphate_reductase_activating_protein	288.021	0.546338	0.116121	4.70492	2.53968e-06	8.39071e-06
RS09750	GNAT_family_acetyltransferase	1561.37	0.542511	0.0790651	6.86156	6.81102e-12	3.96442e-11
RS09755	hypothetical_protein	1794.64	0.550824	0.0805101	6.84167	7.82734e-12	4.51612e-11
RS09760	hypothetical_protein	755.638	0.371905	0.0872823	4.26094	2.0357e-05	6.02191e-05
RS09765	anaerobic_ribonucleoside-triphosphate_reductase	1230.39	-0.222483	0.0954225	-2.33155	0.0197242	0.0356151
RS09770	hypothetical_protein	2660.75	-0.255617	0.066209	-3.86075	0.000113038	0.000298667
RS09775	hypothetical_protein	14.5182	0.184633	0.345202	0.534855	0.59275	0.683199
RS09780	hypothetical_protein	9289.85	1.00313	0.0647231	15.4987	3.53844e-54	1.79553e-52
RS09785	Holliday_junction_resolvase_RuvX	5530.95	1.01356	0.0687152	14.7501	3.07244e-49	1.32182e-47
RS09790	hypothetical_protein	3241.81	1.13169	0.0660796	17.1262	9.46678e-66	6.9388e-64
RS09795	arsenate_reductase	16082.8	1.00326	0.0808554	12.4081	2.3632e-35	5.99586e-34
RS09800	DNA_recombination/repair_protein_RecA	4719.68	0.0750457	0.0679047	1.10516	0.26909	0.361772
RS09805	damage-inducible_protein_A	770.238	0.424757	0.0808594	5.25303	1.49617e-07	5.76054e-07
RS09810	DNA-3-methyladenine_glycosylase_I	627.407	-0.29194	0.0911147	-3.20409	0.00135489	0.00305738
RS09815	Holliday_junction_branch_migration_protein_RuvA	591.095	-0.0749616	0.0877492	-0.854272	0.392954	0.492812
RS09820	MFS_transporter	1246.01	-0.0172326	0.0715422	-0.240873	0.809654	0.854399
RS09825	DNA_mismatch_repair_protein_MutL	1956.96	0.0398133	0.0671603	0.592811	0.553308	0.648188
RS09830	cold-shock_protein	21064.8	0.239617	0.0614538	3.89913	9.65371e-05	0.000259574
RS09835	DNA_mismatch_repair_protein_MutS	1734.57	0.110633	0.0678622	1.63025	0.103048	0.158578
RS09840	arginine_repressor	583.976	0.542913	0.0882961	6.14877	7.8085e-10	3.75986e-09
RS09845	arginine--tRNA_ligase	4017.12	0.00797441	0.0684495	0.116501	0.907256	0.927886
RS09850	bacteriocin_immunity_protein	737.915	0.51515	0.0826229	6.23496	4.51907e-10	2.23581e-09
RS09855	membrane_protein	869.182	0.0293519	0.0846147	0.346889	0.728675	0.788234
RS09860	membrane_protein	1992.83	-0.299003	0.0688744	-4.34128	1.41653e-05	4.25388e-05
RS09865	aspartate--tRNA_ligase	4545.81	0.0273293	0.0558302	0.489508	0.624482	0.70863
RS09870	histidine--tRNA_ligase	2628.43	0.142483	0.0624748	2.28065	0.0225693	0.0402747
RS09875	50S_ribosomal_protein_L32	7586.08	-0.341219	0.065405	-5.21701	1.81832e-07	6.90683e-07
RS09880	50S_ribosomal_protein_L33	4257.66	-0.342825	0.0784795	-4.36833	1.25198e-05	3.79428e-05
RS09885	cadmium_transporter	273.138	0.698688	0.126805	5.50992	3.58988e-08	1.477e-07
RS09890	transcriptional_regulator	266.415	0.59725	0.117435	5.0858	3.66082e-07	1.34661e-06
RS09895	transcriptional_regulator	746.455	0.618237	0.0858733	7.19941	6.04752e-13	3.89838e-12
RS09900	DNA-directed_RNA_polymerase_sigma-70_factor	2.11259	0.193338	0.356141	0.542871	0.587219	NA
RS09905	hypothetical_protein	11.1212	0.391767	0.364579	1.07457	0.282565	0.376817
RS09910	cell_division_protein_FtsK	21.1984	0.577371	0.308116	1.87387	0.0609477	0.0994356
RS09915	hypothetical_protein	30.7289	0.731994	0.276302	2.64925	0.00806698	0.015901
RS09920	hypothetical_protein	6.62868	0.352333	0.386571	0.911434	0.362067	0.46198
RS09925	hypothetical_protein	13.0268	0.733899	0.34918	2.10178	0.0355726	0.061269
RS09930	site-specific_integrase	6644.84	1.00496	0.0635435	15.8154	2.43788e-56	1.30393e-54
RS09935	peptidase	22.7727	1.08755	0.307103	3.54132	0.000398135	0.000971528
RS09940	DNA-binding_response_regulator	359.396	0.495543	0.105912	4.67882	2.88535e-06	9.4695e-06
RS09945	two-component_sensor_histidine_kinase	1053.19	0.256322	0.0729638	3.513	0.000443079	0.00107458
RS09950	hypothetical_protein	16.9384	-0.129882	0.342017	-0.379752	0.70413	0.770424
RS09955	carbamate_kinase	7.98126	-0.519421	0.383593	-1.35409	0.175707	0.250846
RS09960	ornithine_carbamoyltransferase_12C_catabolic	11.261	-0.248199	0.369121	-0.672406	0.501325	0.599108
RS09965	sensor_histidine_kinase	375.409	0.328242	0.112824	2.90933	0.00362205	0.00760939
RS09970	hypothetical_protein	20.0994	0.451284	0.32523	1.38758	0.165264	0.239251
RS09975	glycine/betaine_ABC_transporter_ATP-binding_protein	1169.05	0.598933	0.0902663	6.63518	3.241e-11	1.77671e-10
RS09980	glycine/betaine_ABC_transporter_permease	3977.33	0.360376	0.0757349	4.75839	1.95139e-06	6.52333e-06
RS09985	hypothetical_protein	3747.68	0.0343149	0.0709461	0.483675	0.628616	0.711282
RS09990	hypothetical_protein	1183.17	0.213923	0.0864758	2.47379	0.0133689	0.0251255
RS09995	membrane_protein	63.5422	-0.125222	0.207586	-0.603228	0.546357	0.641686
RS10000	membrane_protein	188.896	-0.277066	0.147721	-1.8756	0.0607104	0.0991302
RS10005	TetR_family_transcriptional_regulator	125.866	-0.300831	0.167362	-1.79748	0.072259	0.116072
RS10010	hypothetical_protein	13.169	-0.0836516	0.352281	-0.237457	0.812302	0.855727
RS10015	hypothetical_protein	2195.7	0.531923	0.0637556	8.34317	7.23245e-17	6.44731e-16
RS10020	hypothetical_protein	815.86	0.82713	0.0932425	8.87075	7.26555e-19	7.52802e-18
RS10025	ArpU_family_transcriptional_regulator	10.9709	0.564422	0.369072	1.5293	0.12619	0.189908
RS10030	hypothetical_protein	5.01079	0.0626154	0.38943	0.160787	0.872261	0.901412
RS10035	hypothetical_protein	13.9973	-0.107863	0.353511	-0.30512	0.760275	0.813289
RS10040	hypothetical_protein	22.6232	0.238357	0.311068	0.766254	0.443525	0.546536
RS10045	DNA_damage-inducible_protein_DnaD	12.0513	0.0782458	0.358999	0.217956	0.827463	0.866429
RS10050	hypothetical_protein	2.91868	-0.304415	0.372988	-0.816153	0.414413	0.51645
RS10055	hypothetical_protein	4.29847	0.527941	0.388037	1.36054	0.173659	0.248676
RS10060	hypothetical_protein	5.52004	0.201038	0.389383	0.516299	0.605646	0.693218
RS10065	hypothetical_protein	3.01088	-0.186883	0.375478	-0.49772	0.618681	0.704471
RS10070	hypothetical_protein	4.51396	-0.119992	0.388521	-0.308844	0.75744	0.810695
RS10075	hypothetical_protein	106.932	-1.0101	0.193862	-5.2104	1.88437e-07	7.11672e-07
RS10080	hypothetical_protein	881.016	-0.564949	0.115103	-4.90821	9.19093e-07	3.19663e-06
RS10085	hypothetical_protein	9.19081	0.325746	0.380394	0.856338	0.391811	0.491689
RS10090	hypothetical_protein	6.94242	-0.288246	0.3867	-0.745399	0.45603	0.557433
RS10095	phage_repressor_protein	4.32301	-0.269293	0.38583	-0.697957	0.485204	0.584786
RS10100	transcriptional_regulator	4.06115	0.032042	0.386899	0.0828175	0.933997	0.948373
RS10105	transcriptional_regulator	623.455	0.564443	0.0970779	5.81433	6.0876e-09	2.69516e-08
RS10110	hypothetical_protein	160.257	0.575613	0.150445	3.82607	0.000130207	0.000342203
RS10115	hypothetical_protein	115.777	0.34635	0.16526	2.09578	0.0361015	0.0618571
RS10120	hypothetical_protein	141.21	0.226711	0.16114	1.40692	0.159451	0.231632
RS10125	hypothetical_protein	683.837	0.202241	0.0880283	2.29746	0.0215928	0.0386716
RS10130	site-specific_integrase	412.384	-0.283324	0.115491	-2.45322	0.0141583	0.0264583
RS10135	30S_ribosomal_protein_S4	14806.2	-0.741457	0.0678901	-10.9214	9.10451e-28	1.53998e-26
RS10140	hypothetical_protein	1870.18	-0.024276	0.0767487	-0.316305	0.751771	0.806372
RS10145	replicative_DNA_helicase	3696.94	-0.00850019	0.0638929	-0.133038	0.894163	0.917156
RS10150	50S_ribosomal_protein_L9	1363.03	0.0365294	0.0731932	0.499082	0.617722	0.704189
RS10155	DHH_family_phosphoesterase	3640.17	0.078689	0.0630937	1.24718	0.212333	0.296129
RS10160	tRNA_uridine-5-carboxymethylaminomethyl(34)_synthesis_enzyme_MnmG	2259.01	0.0447772	0.0733919	0.610111	0.541788	0.638594
RS10165	membrane_protein	948.779	-0.764916	0.112794	-6.78154	1.18905e-11	6.78134e-11
RS10170	tRNA_2-thiouridine(34)_synthase_MnmA	1112.93	-0.620559	0.0806203	-7.6973	1.3897e-14	1.0497e-13
RS10175	L-serine_dehydratase2C_iron-sulfur-dependent_subunit_beta	1529.52	0.458477	0.0780356	5.87522	4.22269e-09	1.89495e-08
RS10180	L-serine_dehydratase2C_iron-sulfur-dependent_subunit_alpha	2586.48	0.407145	0.0763001	5.3361	9.49678e-08	3.72161e-07
RS10185	transglycosylase	754.371	-0.986008	0.0912907	-10.8008	3.41402e-27	5.49297e-26
RS10190	peptidoglycan-binding_protein_LysM	260.095	0.136138	0.122924	1.10749	0.268081	0.36066
RS10195	transporter	835.167	-0.902894	0.0936969	-9.63632	5.61667e-22	6.57716e-21
RS10200	energy-coupling_factor_transporter_ATPase	782.552	-0.519798	0.0817159	-6.36104	2.00394e-10	1.02741e-09
RS10205	energy-coupling_factor_transporter_ATPase	2452.53	-0.0703194	0.0682324	-1.03059	0.302735	0.398668
RS10210	CDP-diacylglycerol--glycerol-3-phosphate_3-phosphatidyltransferase	1195.07	0.0332559	0.0730687	0.455131	0.649015	0.728531
RS10215	peptidase_M16	1555.64	-0.00395761	0.0690934	-0.0572791	0.954323	0.966038
RS10220	peptidase_M16	1011.9	0.278157	0.083276	3.34018	0.000837239	0.00196082
RS10225	hypothetical_protein	620.722	0.403683	0.0877481	4.60048	4.21522e-06	1.35421e-05
RS10230	DNA_replication_and_repair_protein_RecF	2213.5	0.279081	0.0628286	4.44194	8.91504e-06	2.7567e-05
RS10235	sugar_transporter	1440	-0.229741	0.0730627	-3.14443	0.00166409	0.00368783
RS10240	transcriptional_regulator	642.422	-0.143881	0.10248	-1.404	0.160319	0.232604
RS10245	IMP_dehydrogenase	6762.42	0.314496	0.0607477	5.17709	2.25376e-07	8.47946e-07
RS10250	arginine_repressor	998.239	0.224582	0.0795985	2.82144	0.00478082	0.00983498
RS10255	ArcR_family_transcriptional_regulator	940.518	0.345305	0.0816493	4.22912	2.34606e-05	6.8783e-05
RS10260	hypothetical_protein	178.928	0.361417	0.146752	2.46277	0.0137868	0.0258371
RS10265	arginine_deiminase	4337.57	-0.54081	0.0758796	-7.12721	1.02423e-12	6.43474e-12
RS10270	GNAT_family_N-acetyltransferase	159.126	0.0698243	0.142419	0.490275	0.623939	0.70842
RS10275	ornithine_carbamoyltransferase	530.305	0.0584162	0.121977	0.47891	0.632003	0.713889
RS10280	arginine-ornithine_antiporter	389.999	0.170555	0.126581	1.3474	0.177851	0.253579
RS10285	carbamate_kinase	260.967	0.07764	0.149428	0.519582	0.603355	0.691303
RS10290	tryptophan--tRNA_ligase	2701.57	0.0828724	0.0681342	1.21631	0.223866	0.30938
RS10295	DUF1275_family_protein	608.628	0.444754	0.0958264	4.64125	3.46312e-06	1.12537e-05
RS10300	membrane_protein	891.296	0.487582	0.0808233	6.03269	1.61254e-09	7.52647e-09
RS10305	ABC-F_family_ATPase	7821.65	0.0943361	0.0563931	1.67283	0.0943604	0.147271
RS10310	copper_ABC_transporter_permease	2157.73	0.0452369	0.067111	0.67406	0.500273	0.598307
RS10330	23S_rRNA_(pseudouridine(1915)-N(3))-methyltransferase_RlmH	387.037	0.118846	0.10061	1.18125	0.237502	0.324373
RS10335	serine_protease	2239.83	1.34824	0.0844998	15.9556	2.60465e-57	1.43183e-55
RS10340	chromosome_partitioning_protein_ParB	871.337	0.548677	0.0809412	6.77871	1.2125e-11	6.89523e-11
RS10355	transcriptional_regulator	24.0381	0.725425	0.298771	2.42803	0.0151811	0.0282097
RS10360	hypothetical_protein	11725.6	1.48804	0.0696906	21.3521	3.73142e-101	6.71317e-99
RS10365	hypothetical_protein	90.004	0.0765033	0.182054	0.420224	0.674322	0.748266
RS10370	hypothetical_protein	94.8605	0.470908	0.175264	2.68685	0.00721301	0.0143175
RS10375	hypothetical_protein	48.2987	0.338979	0.235349	1.44032	0.149776	0.219723
RS10380	hypothetical_protein	20.4657	0.249064	0.321062	0.775748	0.437898	0.540611
RS10385	hypothetical_protein	2.55512	-0.133873	0.370057	-0.361764	0.717528	0.779785
RS10390	endonuclease	181.489	0.376918	0.139542	2.70111	0.00691092	0.0137731
RS10395	hypothetical_protein	1889.32	-0.286237	0.212893	-1.34451	0.178783	0.25471
RS10400	hypothetical_protein	7.93259	-0.130195	0.381054	-0.341671	0.732599	0.79052
RS10405	competence_protein_CglA	13.441	0.247919	0.351245	0.705828	0.480295	0.580638
RS10410	hypothetical_protein	73.8233	-0.0814062	0.198798	-0.409493	0.682178	0.754207
RS10415	hypothetical_protein	1.81713	-0.2831	0.335964	-0.84265	0.399424	NA
RS10420	hypothetical_protein	34.3237	-0.512983	0.273419	-1.87618	0.060631	0.0990824
RS10425	hypothetical_protein	41.9865	-0.476719	0.251149	-1.89815	0.0576766	0.0944884
RS10430	hypothetical_protein	439.685	0.405418	0.108598	3.73319	0.000189068	0.000483417
RS10440	hypothetical_protein	41.9483	-0.259426	0.248235	-1.04508	0.295984	0.391808
RS10445	hypothetical_protein	1.82271	-0.0259562	0.344319	-0.0753841	0.939909	NA
RS10450	hypothetical_protein	4.84675	0.343218	0.389372	0.881466	0.378066	0.478384
RS10455	hypothetical_protein	6.73768	-0.397945	0.386479	-1.02967	0.303166	0.398668
RS10460	hypothetical_protein	7.40217	-0.0095147	0.387888	-0.0245295	0.98043	0.986412
RS10470	IS3_family_transposase	172.263	-0.118593	0.142006	-0.835126	0.403647	0.504304
RS10475	hypothetical_protein	4.96097	-0.0147033	0.389325	-0.0377662	0.969874	0.977779
RS10480	site-specific_integrase	226.453	0.167532	0.13026	1.28613	0.198397	0.278855
RS10485	hypothetical_protein	1007.84	-0.626715	0.0801714	-7.81719	5.40163e-15	4.19209e-14
RS10490	hypothetical_protein	4.50645	0.291256	0.388681	0.749343	0.45365	0.554866
RS10495	site-specific_integrase	5.10265	0.328171	0.388499	0.844715	0.39827	0.49853
RS10500	hypothetical_protein	504.729	-0.471505	0.0968123	-4.8703	1.11426e-06	3.82171e-06
RS10505	NINE_protein	22.3681	0.8452	0.30394	2.78081	0.00542229	0.0110285
RS10510	hypothetical_protein	962.506	1.16256	0.0831883	13.975	2.21363e-44	8.11253e-43
RS10515	TetR_family_transcriptional_regulator	89.1422	0.107447	0.19778	0.543264	0.586948	0.678487
RS10520	plasmid_mobilization_relaxosome_protein_MobC	3.95907	0.22124	0.38496	0.574708	0.565489	0.660238
RS10525	hypothetical_protein	1.5898	-0.00179518	0.33244	-0.00540001	0.995691	NA
RS10530	hypothetical_protein	125.223	0.147732	0.155779	0.948345	0.342954	0.442024
RS10535	hypothetical_protein	242.999	0.176971	0.122499	1.44468	0.148549	0.218247
RS10540	ABC_transporter_ATP-binding_protein	54.1123	-0.600552	0.22929	-2.61918	0.00881421	0.0171517
RS10545	hypothetical_protein	2.14523	0.198407	0.356468	0.556593	0.577806	NA
RS10550	alpha/beta_hydrolase	15.4374	0.484035	0.337575	1.43386	0.151613	0.22176
RS10555	hypothetical_protein	1673.91	0.891824	0.0812375	10.978	4.87623e-28	8.46497e-27
RS10560	cell_wall_surface_anchor	57.6727	-0.224666	0.224144	-1.00233	0.316185	0.412531
RS10565	MarR_family_transcriptional_regulator	2128.28	-0.0711114	0.0914012	-0.778014	0.436561	0.539634
RS10570	hypothetical_protein	0.619593	0.175535	0.231045	0.759745	0.447407	NA
RS10575	hypothetical_protein	106.148	-0.221395	0.172649	-1.28235	0.199722	0.280318
RS10585	hypothetical_protein	0.729144	0.0212624	0.259675	0.0818808	0.934742	NA
RS10590	tetracycline_resistance_protein	76.0538	0.459823	0.202543	2.27025	0.0231925	0.0411641
RS10595	conjugal_transfer_protein	178.41	-0.949457	0.161632	-5.87418	4.24944e-09	1.90263e-08
RS10600	conjugal_transfer_protein	16.4363	0.379023	0.32993	1.1488	0.250639	0.339912
RS10605	hypothetical_protein	95.2751	0.594184	0.181832	3.26777	0.00108399	0.00248864
RS10610	hypothetical_protein	100.292	0.462363	0.174153	2.65493	0.00793258	0.0156516
RS10615	hypothetical_protein	86.4784	0.587409	0.187172	3.13835	0.00169904	0.00374849
RS10620	hypothetical_protein	195.038	0.14871	0.141091	1.054	0.291884	0.387417
RS10625	peptide_ABC_transporter_permease	1.92364	-0.317811	0.339061	-0.937328	0.34859	NA
RS10630	IS3_family_transposase	277.215	-0.0868749	0.133317	-0.651644	0.514631	0.611317
RS10635	hypothetical_protein	2.17925	0.20281	0.356785	0.568438	0.569738	NA
RS10640	IS3_family_transposase	182.298	-0.136457	0.13846	-0.985536	0.324361	0.421754
RS10645	IS3_family_transposase	212.976	0.409747	0.129736	3.1583	0.00158692	0.00352867
RS10650	transposase	183.074	0.981218	0.193791	5.06328	4.12102e-07	1.49917e-06
RS10655	chromosome_partitioning_protein_ParA	18.0106	-0.357916	0.328336	-1.09009	0.275674	0.369232
RS10660	IS3_family_transposase	126.476	-0.0535774	0.164848	-0.325011	0.745173	0.800237
RS10665	IS3_family_transposase	91.4081	0.537467	0.188031	2.8584	0.00425783	0.00886973
RS10670	HXXEE_domain-containing_protein	73.6296	0.379938	0.195958	1.93888	0.0525161	0.0864636
RS10675	hypothetical_protein	12.8609	0.270488	0.355497	0.760873	0.446733	0.550146
RS10680	N-acetyltransferase	239.914	-0.265538	0.134101	-1.98013	0.0476891	0.0795757
RS10685	hypothetical_protein	194.334	-0.323118	0.136045	-2.37508	0.0175453	0.0321059
RS10690	50S_ribosomal_protein_L33	383.037	-0.197936	0.105179	-1.8819	0.0598496	0.0979618
RS10695	hypothetical_protein	1.53475	0.138437	0.322326	0.429492	0.667565	NA
RS10700	hypothetical_protein	9.95552	0.0498361	0.367198	0.13572	0.892043	0.91659
RS10705	CAAX_protease_family_protein	99.6265	-0.324768	0.175597	-1.84951	0.0643841	0.104183
RS10710	hypothetical_protein	260.585	-0.0979434	0.13184	-0.742898	0.457544	0.55866
RS10715	hypothetical_protein	18.0464	0.31945	0.321256	0.994378	0.320039	0.416957
RS10720	membrane_protein	778.022	0.027478	0.0811689	0.338529	0.734965	0.792209
RS10725	hypothetical_protein	236.572	0.454104	0.12155	3.73595	0.000187006	0.000478764
RS10730	hypothetical_protein	25.6167	-0.115173	0.292331	-0.393983	0.693594	0.762144
RS10735	hypothetical_protein	6.92221	-0.390417	0.389159	-1.00323	0.315748	0.412452
RS10740	hypothetical_protein	0.249488	-0.121313	0.163254	-0.743093	0.457426	NA
RS10745	hypothetical_protein	68.2822	0.188028	0.210016	0.895301	0.370626	0.4709
RS10750	high-affinity_branched-chain_amino_acid_ABC_transporter_ATP-binding_protein_LivG	39.4526	0.260946	0.260362	1.00224	0.316225	0.412531
RS10755	hypothetical_protein	449.782	-0.119251	0.134707	-0.885262	0.376015	0.476398
RS10760	hypothetical_protein	85.4664	-0.122478	0.184423	-0.664113	0.506618	0.60361
RS10765	hypothetical_protein	82.4961	-0.0447868	0.200781	-0.223063	0.823487	0.864552
RS10770	hypothetical_protein	148.761	0.0321874	0.146012	0.220443	0.825527	0.864879
RS10775	hypothetical_protein	145.126	0.288519	0.146979	1.963	0.049646	0.082424
RS10780	hypothetical_protein	54.7519	0.107195	0.22151	0.483927	0.628438	0.711282
RS10785	hypothetical_protein	103.485	0.138014	0.185801	0.742806	0.457599	0.55866
RS10790	hypothetical_protein	95.6295	0.490167	0.174056	2.81615	0.00486032	0.00998813
RS10795	hypothetical_protein	144.286	0.411785	0.150319	2.73941	0.006155	0.0123662
[truncated: 20 more rows]

## Sheet: edger
id	function	logFC	logCPM	LR	PValue	FDR
RS00005	chromosomal_replication_initiator_protein_DnaA	0.134989	8.938	2.98485	0.0840473	0.208023
RS00010	DNA_polymerase_III_subunit_beta	0.395745	9.66851	24.3642	7.97365e-07	7.14545e-06
RS00015	diacylglycerol_kinase	-0.254433	6.17906	4.14318	0.0418025	0.120717
RS00020	hypothetical_protein	-0.0225615	4.90245	0.0225049	0.880752	0.990922
RS00025	GTP-binding_protein_YchF	0.0538081	10.0313	0.570304	0.450138	0.66902
RS00030	aminoacyl-tRNA_hydrolase	-0.126982	5.45735	0.970812	0.324478	0.544271
RS00035	transcription-repair_coupling_factor	-0.248869	9.06569	9.94361	0.00161409	0.00750874
RS00040	hypothetical_protein	-0.84001	7.6825	93.8924	3.33158e-22	1.44745e-20
RS00045	septum_formation_initiation_protein	-0.628394	7.33102	47.7555	4.82833e-12	8.36109e-11
RS00050	hypothetical_protein	-0.462136	5.31202	13.277	0.000268683	0.00153452
RS00055	serine_hydrolase	-0.227652	8.75752	9.57757	0.00196969	0.0089575
RS00060	tRNA(Ile)-lysidine_synthetase	-0.118588	8.38933	2.31138	0.12843	0.283292
RS00065	hypoxanthine-guanine_phosphoribosyltransferase	-0.0870282	9.37389	1.55022	0.213103	0.406333
RS00070	cell_division_protein_FtsH	0.180569	11.2883	8.06128	0.00452213	0.0187274
RS00245	CHAP_domain-containing_protein	1.02062	11.6918	148.514	3.66179e-34	3.56366e-32
RS00250	ribose-phosphate_pyrophosphokinase_1	0.227139	11.1608	11.0877	0.00086904	0.00432388
RS00255	aminotransferase_A	-1.72554	10.0852	403.903	7.78534e-90	4.73543e-87
RS00260	DNA_repair_protein_RecO	-1.65871	10.3747	324.022	1.92695e-72	7.21272e-70
RS00265	CPBP_family_intramembrane_metalloprotease	-0.428205	2.43395	2.06048	0.151162	0.317875
RS00270	phosphate_acyltransferase	-0.180905	9.18327	5.88775	0.0152466	0.0522464
RS00275	acyl_carrier_protein	0.0179855	9.79861	0.0580835	0.809551	0.952436
RS00280	phosphoribosylaminoimidazolesuccinocarboxamide_synthase	-1.30954	2.40718	16.9831	3.77139e-05	0.000255237
RS00285	phosphoribosylformylglycinamidine_synthase	-0.315768	4.38634	4.70968	0.0299933	0.0923718
RS00290	amidophosphoribosyltransferase	-0.151425	3.71949	0.522275	0.469873	0.690537
RS00295	phosphoribosylformylglycinamidine_cyclo-ligase	-0.37088	3.45997	3.11061	0.0777837	0.194699
RS00300	phosphoribosylglycinamide_formyltransferase	-0.0767902	2.58882	0.0824177	0.774047	0.926572
RS00305	GNAT_family_acetyltransferase	-0.245485	5.07736	2.32233	0.127529	0.281687
RS00310	bifunctional_phosphoribosylaminoimidazolecarboxamide_formyltransferase/inosine_monophosphate_cyclohydrolase	-0.194356	7.06307	3.62316	0.0569805	0.154798
RS00315	hypothetical_protein	-2.94488	3.77199	159.46	1.48432e-36	1.90072e-34
RS00320	peptidoglycan-binding_protein_LysM	-0.134473	9.53427	2.17967	0.139844	0.302436
RS00325	N-acetylmannosamine-6-phosphate_2-epimerase	-0.386376	2.28843	1.6922	0.193312	0.380063
RS00330	sugar_ABC_transporter_substrate-binding_protein	-0.85674	2.74451	9.74026	0.00180275	0.008307
RS00335	sugar_ABC_transporter_permease	-0.389891	0.997803	0.604406	0.436902	0.658042
RS00340	sugar_ABC_transporter_permease	-0.327708	1.36922	0.499906	0.479541	0.697593
RS00345	hypothetical_protein	-0.386484	1.00395	0.556991	0.455475	0.67407
RS00350	hypothetical_protein	-0.139994	2.15352	0.155211	0.693604	0.86897
RS00355	N-acetylneuraminate_lyase	0.172286	2.37344	0.219305	0.63957	0.833902
RS00360	sugar_kinase	-0.744451	2.30236	5.76971	0.0163047	0.0551729
RS00365	acetylxylan_esterase	-0.298363	3.42586	2.16747	0.140958	0.3039
RS00370	MurR/RpiR_family_transcriptional_regulator	0.680409	7.27872	48.9832	2.58165e-12	4.55157e-11
RS00375	phosphoribosylamine--glycine_ligase	-0.6459	2.76855	6.76988	0.00927091	0.0346118
RS00380	5-(carboxyamino)imidazole_ribonucleotide_mutase	-0.217928	1.52536	0.147547	0.70089	0.871355
RS00385	5-(carboxyamino)imidazole_ribonucleotide_synthase	0.247677	3.44112	1.10379	0.293436	0.508316
RS00390	hypothetical_protein	-0.030471	7.00034	0.0780135	0.780008	0.931415
RS00395	hypothetical_protein	0.277187	6.46021	5.78581	0.0161561	0.0547462
RS00400	adenylosuccinate_lyase	0.194072	8.02598	5.36631	0.0205294	0.0666863
RS00405	transcriptional_regulator	-0.123437	5.07296	0.740395	0.389535	0.610459
RS00410	Holliday_junction_branch_migration_DNA_helicase_RuvB	0.0716626	8.43978	0.494	0.482148	0.700338
RS00415	hypothetical_protein	-0.52124	8.01347	31.4376	2.05955e-08	2.3145e-07
RS00420	membrane_protein	-0.276397	7.86678	8.2904	0.00398551	0.0168639
RS00425	acyltransferase	-0.0418424	10.937	0.371571	0.542149	0.755686
RS00430	bifunctional_acetaldehyde-CoA/alcohol_dehydrogenase	-0.64619	9.60484	36.5714	1.47178e-09	1.89965e-08
RS00435	zinc-dependent_alcohol_dehydrogenase	-0.300472	6.42306	3.32291	0.0683209	0.176179
RS00440	threonine_synthase	-0.478202	8.1402	30.8723	2.75574e-08	3.02696e-07
RS00445	MATE_family_efflux_transporter	-0.244998	8.27286	10.3189	0.00131673	0.00626317
RS00450	30S_ribosomal_protein_S10	0.795647	10.2772	95.0999	1.81013e-22	8.15563e-21
RS00455	50S_ribosomal_protein_L3	0.820601	10.9286	136.939	1.24366e-31	1.00861e-29
RS00460	50S_ribosomal_protein_L4	0.789968	11.3629	155.46	1.11065e-35	1.28677e-33
RS00465	50S_ribosomal_protein_L23	0.748483	10.4566	124.707	5.89992e-29	4.10129e-27
RS00470	50S_ribosomal_protein_L2	0.788996	11.8857	147.412	6.37901e-34	6.08632e-32
RS00475	30S_ribosomal_protein_S19	0.740796	10.5173	123.446	1.11359e-28	7.52598e-27
RS00480	50S_ribosomal_protein_L22	0.727993	11.2237	96.5152	8.85626e-23	4.02753e-21
RS00485	30S_ribosomal_protein_S3	0.73125	11.8171	132.902	9.4978e-31	7.57644e-29
RS00490	50S_ribosomal_protein_L16	0.671648	11.1956	107.871	2.8689e-25	1.50108e-23
RS00495	50S_ribosomal_protein_L29	0.687013	10.154	80.8806	2.39771e-19	7.88327e-18
RS00500	30S_ribosomal_protein_S17	0.742019	10.9665	118.037	1.70176e-27	1.0482e-25
RS00505	50S_ribosomal_protein_L14	0.693249	10.7304	86.1691	1.65188e-20	5.95412e-19
RS00510	50S_ribosomal_protein_L24	0.801909	10.94	114.623	9.5184e-27	5.449e-25
RS00515	50S_ribosomal_protein_L5	0.742192	11.7447	128.107	1.06373e-29	8.08769e-28
RS00520	30S_ribosomal_protein_S14_type_Z	0.739102	10.0736	117.23	2.55635e-27	1.5357e-25
RS00525	30S_ribosomal_protein_S8	0.792479	11.1232	114.044	1.27476e-26	7.12988e-25
RS00530	50S_ribosomal_protein_L6	0.774259	11.5918	150.903	1.10069e-34	1.13956e-32
RS00535	50S_ribosomal_protein_L18	0.834662	10.4925	141.229	1.43371e-32	1.24579e-30
RS00540	30S_ribosomal_protein_S5	0.760417	11.0713	144.112	3.35751e-33	3.02549e-31
RS00545	50S_ribosomal_protein_L30	0.775331	9.93513	114.11	1.23262e-26	6.97432e-25
RS00550	50S_ribosomal_protein_L15	0.79765	10.988	145.197	1.94481e-33	1.78555e-31
RS00555	preprotein_translocase_subunit_SecY	0.775023	13.2297	116.383	3.91862e-27	2.29735e-25
RS00560	adenylate_kinase	0.516912	8.73407	50.5779	1.14526e-12	2.07942e-11
RS00565	translation_initiation_factor_IF-1	0.642764	11.2947	82.2128	1.22196e-19	4.10075e-18
RS00570	50S_ribosomal_protein_L36	0.622296	10.2261	56.7036	5.06711e-14	1.02309e-12
RS00575	30S_ribosomal_protein_S13	0.734889	11.3243	137.211	1.08438e-31	8.94338e-30
RS00580	30S_ribosomal_protein_S11	0.766276	11.6908	151.848	6.8411e-35	7.2367e-33
RS00585	DNA-directed_RNA_polymerase_subunit_alpha	0.806396	12.1645	152.766	4.30957e-35	4.76599e-33
RS00590	50S_ribosomal_protein_L17	0.853536	11.9386	178.559	1.00001e-40	1.47456e-38
RS00680	hypothetical_protein	-0.223353	3.0316	0.938449	0.332677	0.554766
RS00685	hypothetical_protein	-0.410728	4.53369	7.80551	0.00520871	0.0210686
RS00690	hypothetical_protein	-0.2866	4.80702	4.12021	0.0423737	0.122079
RS00695	hypothetical_protein	-0.634641	5.06902	20.4726	6.04911e-06	4.7096e-05
RS00700	hypothetical_protein	-0.504573	9.80804	31.4289	2.06874e-08	2.31946e-07
RS00705	hypothetical_protein	-0.60542	1.19438	1.73658	0.187573	0.371481
RS00710	histidine_phosphatase_family_protein	-0.588736	7.32838	31.3984	2.1015e-08	2.3397e-07
RS00715	D-alanyl-D-alanine_carboxypeptidase	-0.424713	8.31351	26.8848	2.15948e-07	2.1016e-06
RS00720	N-acetylmuramoyl-L-alanine_amidase	-0.200771	8.39841	6.27465	0.0122477	0.0434068
RS00725	heat-inducible_transcriptional_repressor_HrcA	-0.437836	9.26514	21.279	3.97054e-06	3.20409e-05
RS00730	nucleotide_exchange_factor_GrpE	-0.358275	9.31445	17.3709	3.07502e-05	0.000213149
RS00735	molecular_chaperone_DnaK	-0.728507	11.941	81.4284	1.8173e-19	6.01562e-18
RS00740	chaperone_DnaJ	-0.713259	10.1103	76.5287	2.17033e-18	6.47903e-17
RS00745	GntR_family_transcriptional_regulator	-0.3043	5.99875	7.24471	0.007111	0.0275275
RS00750	tRNA_pseudouridine(38-40)_synthase_TruA	0.0277484	7.19923	0.0871525	0.767829	0.922077
RS00755	hydroxymethylpyrimidine/phosphomethylpyrimidine_kinase	-0.0213619	7.1019	0.0567071	0.811778	0.954595
RS00760	membrane_protein	-0.0169398	5.6143	0.0159245	0.89958	0.998367
RS00765	TIGR01440_family_protein	0.165609	6.86947	2.52044	0.112379	0.255601
RS00770	mechanosensitive_ion_channel_protein	-0.080017	7.95051	0.855035	0.355132	0.571452
RS00775	trigger_factor	0.521261	12.3115	45.3676	1.6331e-11	2.66667e-10
RS00780	DNA-directed_RNA_polymerase_subunit_delta	0.119258	9.57331	3.12256	0.0772153	0.193675
RS00785	CTP_synthetase	-0.98396	12.1649	97.9624	4.26393e-23	1.99503e-21
RS00790	alpha/beta_hydrolase	0.0730672	8.54992	0.939086	0.332513	0.554682
RS01045	4-(cytidine_5-diphospho)-2-C-methyl-D-erythritol_kinase	-0.796214	8.69291	115.162	7.25143e-27	4.20065e-25
RS01050	transcriptional_regulator	-0.444411	7.79458	21.2295	4.0744e-06	3.27162e-05
RS01055	zinc_ABC_transporter_ATP-binding_protein	-0.412141	8.36128	18.088	2.10928e-05	0.00015116
RS01060	zinc_ABC_transporter_permease	-0.189678	9.40551	5.83169	0.01574	0.0535225
RS01075	tyrosine--tRNA_ligase	0.248375	9.63866	12.0836	0.000508686	0.00265505
RS01080	penicillin-binding_protein_1B	0.202903	10.5417	8.65265	0.00326586	0.0140884
RS01085	DNA-directed_RNA_polymerase_subunit_beta	1.04708	11.561	189.288	4.54622e-43	7.90069e-41
RS01310	23S_rRNA_(guanosine(2251)-2-O)-methyltransferase_RlmB	-0.185994	8.01151	3.85322	0.0496505	0.137742
RS01315	hypothetical_protein	0.237596	7.38028	5.25876	0.0218365	0.0703686
RS01320	fatty_acid-binding_protein_DegV	0.879566	10.0154	122.459	1.832e-28	1.20466e-26
RS01325	transcriptional_regulator	0.552867	3.52246	6.83959	0.00891595	0.0334245
RS01330	50S_ribosomal_protein_L13	0.288129	11.7775	17.9906	2.22002e-05	0.000157702
RS01335	30S_ribosomal_protein_S9	0.314699	11.5756	16.5524	4.73246e-05	0.000315887
RS01340	site-specific_integrase	-0.219266	8.13826	7.08349	0.00777975	0.0296679
RS01345	transcriptional_regulator	-0.106368	6.91983	1.08185	0.298285	0.513062
RS01350	hypothetical_protein	0.728593	1.78364	2.73658	0.0980744	0.233593
RS01355	hypothetical_protein	0.579968	2.55881	3.67149	0.0553508	0.151228
RS01360	hypothetical_protein	0.0477568	1.61021	0.0146403	0.903693	1
RS01365	hypothetical_protein	-0.0216342	1.6185	0.00308385	0.955714	1
RS01370	hypothetical_protein	0.33297	2.46788	1.34095	0.246866	0.456402
RS01375	hypothetical_protein	-0.0398006	6.177	0.0784231	0.779446	0.930973
RS01380	restriction_endonuclease	0.255051	9.4498	8.73729	0.00311768	0.0135573
RS01385	hypothetical_protein	0.562485	9.85895	55.4243	9.71305e-14	1.91351e-12
RS01390	ATP-dependent_DNA_helicase_RecG	0.705037	8.57458	74.708	5.45739e-18	1.5807e-16
RS01395	hypothetical_protein	0.154343	0.4018	0.0503313	0.822488	0.960378
RS01400	hypothetical_protein	-0.831043	1.39293	3.70543	0.0542355	0.14899
RS01405	MutR_family_transcriptional_regulator	-0.583219	5.22193	11.8093	0.000589345	0.00302506
RS01410	MFS_transporter	-0.501561	5.05966	15.6169	7.75601e-05	0.00050321
RS01415	amino_acid_ABC_transporter_permease	-0.698703	10.3534	69.388	8.08788e-17	2.1624e-15
RS01420	osmoprotectant_ABC_transporter_substrate-binding_protein	-0.69135	10.1319	110.807	6.52185e-26	3.4874e-24
RS01425	choline_ABC_transporter_permease	-0.604863	9.15227	62.6444	2.47608e-15	5.55236e-14
RS01430	glycine/betaine_ABC_transporter_ATP-binding_protein	-0.720638	10.3165	119.593	7.76777e-28	4.90883e-26
RS01515	hypothetical_protein	-0.0857474	5.83074	0.418904	0.517485	0.732
RS01520	hypothetical_protein	0.0803248	7.93204	0.540877	0.462069	0.682169
RS01525	hypothetical_protein	0.133903	5.70378	0.812882	0.367269	0.584795
RS01530	hypothetical_protein	0.124425	6.0367	0.835966	0.360553	0.577056
RS01535	acetyltransferase	-0.663573	7.86087	37.0617	1.14452e-09	1.49309e-08
RS01540	GNAT_family_N-acetyltransferase	-0.558952	7.70957	22.263	2.37738e-06	1.97412e-05
RS01545	acetyltransferase	-0.480967	8.37553	20.3987	6.28716e-06	4.85609e-05
RS01550	hypothetical_protein	0.00743422	7.02699	0.00476992	0.944938	1
RS01555	DNA-directed_RNA_polymerase_sigma-70_factor	-0.106109	5.71196	0.746078	0.387721	0.608008
RS01560	lipoprotein	-0.251858	2.0379	0.587559	0.443365	0.663379
RS01565	TetR_family_transcriptional_regulator	-0.259768	5.29969	4.30524	0.0379951	0.111848
RS01570	antibiotic_ABC_transporter_permease	-0.479526	5.07397	13.0061	0.000310481	0.00172663
RS01575	glycosyl_transferase_family_2	-0.854194	4.10629	26.5785	2.53044e-07	2.42862e-06
RS01580	hypothetical_protein	0.0131474	6.24703	0.0118368	0.913364	1
RS01585	PadR_family_transcriptional_regulator	-0.17615	4.11917	1.11424	0.291162	0.504916
RS01590	hypothetical_protein	0.716961	9.01982	63.0495	2.01575e-15	4.60501e-14
RS01595	N-acetylglucosamine-6-phosphate_deacetylase	0.442358	8.77097	28.0168	1.20267e-07	1.21415e-06
RS01600	isoprenylcysteine_carboxyl_methyltransferase	-0.25813	2.18841	0.472884	0.491663	0.711399
RS01605	glycine--tRNA_ligase_subunit_alpha	0.670768	9.4651	56.8957	4.59542e-14	9.31722e-13
RS01610	FMN-dependent_NADH-azoreductase	0.741892	8.50114	65.3563	6.251e-16	1.52087e-14
RS01615	glycine--tRNA_ligase_subunit_beta	0.596131	10.4602	65.467	5.90963e-16	1.44504e-14
RS01620	hypothetical_protein	0.540913	8.55409	41.4346	1.21881e-10	1.79176e-09
RS01625	membrane_protein	-0.181258	3.87932	1.16945	0.279513	0.490929
RS01630	glycerol_kinase	0.132514	6.28535	1.16519	0.280391	0.491237
RS01635	alpha-glycerophosphate_oxidase	-0.13212	5.83979	1.3055	0.253211	0.462162
RS01640	glycerol_transporter	-0.146937	5.25926	1.27498	0.258835	0.46926
RS01645	NADH_peroxidase	0.772815	6.09333	41.945	9.38776e-11	1.39697e-09
RS01650	hypothetical_protein	1.0171	6.53629	88.5624	4.9256e-21	1.85798e-19
RS01655	transketolase	0.178093	10.7572	6.35933	0.0116765	0.0416332
RS01660	bacteriocin_immunity_protein	0.121338	7.48752	1.48917	0.222345	0.420004
RS01665	3-dehydroquinate_dehydratase	0.136359	8.92758	3.191	0.0740448	0.187267
RS01670	ABC_transporter_permease	0.236485	10.4318	9.2211	0.00239242	0.0106901
RS01675	PTS_cellobiose_transporter_subunit_IIC	0.16857	9.59201	0.708427	0.399966	0.622198
RS01680	glutamate_5-kinase	-0.159063	9.04031	4.27707	0.0386298	0.113442
RS01685	gamma-glutamyl-phosphate_reductase	0.0370454	10.3416	0.299077	0.584462	0.788788
RS01690	16S_rRNA_(cytosine(1402)-N(4))-methyltransferase	0.205524	8.90731	6.57789	0.0103253	0.0377635
RS01695	cell_division_protein_FtsL	0.488281	7.32168	22.1724	2.49231e-06	2.05882e-05
RS01700	penicillin-binding_protein_2X	0.715271	9.90487	116.946	2.95026e-27	1.75073e-25
RS01705	phospho-N-acetylmuramoyl-pentapeptide-transferase	0.946915	8.95875	173.461	1.29834e-39	1.85815e-37
RS01710	DEAD/DEAH_box_helicase	0.229571	9.56401	9.46633	0.00209278	0.00946418
RS01715	amino_acid_ABC_transporter_substrate-binding_protein	-0.637443	9.03122	55.4595	9.54053e-14	1.89487e-12
RS01720	amino_acid_ABC_transporter_permease	-0.369234	9.35899	23.9597	9.83714e-07	8.64034e-06
RS01725	amino_acid_ABC_transporter_ATP-binding_protein	-0.142605	9.74706	3.42434	0.0642421	0.168156
RS01730	membrane_protein	-0.165568	6.26557	2.14085	0.143422	0.307171
RS01735	thioredoxin-disulfide_reductase	0.032508	10.2024	0.108858	0.741448	0.902423
RS01740	nicotinate_phosphoribosyltransferase	0.233149	9.27648	7.67644	0.00559465	0.0223878
RS01745	NAD(+)_synthetase	0.387439	9.30354	29.4569	5.71755e-08	6.07459e-07
RS01750	aminopeptidase_C	0.385538	9.21136	27.957	1.24042e-07	1.24709e-06
RS01755	penicillin-binding_protein_1A	0.111016	11.1694	2.74923	0.0973013	0.232777
RS01760	Holliday_junction_resolvase_RecU	0.0392202	8.86542	0.16345	0.686	0.861785
RS01765	hypothetical_protein	0.432411	4.35992	8.09715	0.0044335	0.0184388
RS01770	cell_cycle_protein_GpsB	-0.267617	9.49791	9.53753	0.00201312	0.00912941
RS01775	RNA_methyltransferase	0.522946	8.46531	41.088	1.45524e-10	2.12648e-09
RS01780	hypothetical_protein	0.358655	10.4619	31.5368	1.957e-08	2.21459e-07
RS01785	S-ribosylhomocysteine_lyase	-0.0510903	9.68511	0.467629	0.49408	0.71341
RS01790	ribonuclease_Y	0.768106	10.232	120.331	5.35322e-28	3.47317e-26
RS01795	multidrug_ABC_transporter_ATP-binding_protein	-0.52312	5.46966	14.5956	0.000133224	0.000818523
RS01800	ABC_transporter_permease	-0.689235	5.52214	30.4598	3.4086e-08	3.72724e-07
RS01805	sensor_histidine_kinase	-0.649878	7.94671	64.1029	1.18088e-15	2.803e-14
RS01810	DNA-binding_response_regulator	-0.558561	7.2734	32.6836	1.08448e-08	1.27465e-07
RS01815	DUF1211_domain-containing_membrane_protein	-0.428287	8.02866	27.0834	1.94862e-07	1.91169e-06
RS01820	guanylate_kinase	0.546846	7.94674	44.7689	2.21711e-11	3.51415e-10
RS01825	DNA-directed_RNA_polymerase_subunit_omega	0.853199	8.9	107.308	3.81095e-25	1.97278e-23
RS02840	TlyA_family_rRNA_(cytidine-2-O)-methyltransferase	0.0454706	8.21518	0.339625	0.560046	0.771165
RS02845	ArgR_family_transcriptional_regulator	0.188131	7.92462	3.69732	0.0545	0.149323
RS02850	DNA_repair_protein_RecN	0.212122	9.54688	9.05426	0.00262084	0.0116042
RS02855	hypothetical_protein	0.270415	9.33891	14.3161	0.000154538	0.000935303
RS02860	lipase	0.377561	8.07912	22.0364	2.67524e-06	2.19523e-05
RS02865	membrane_protein	0.588536	7.29752	40.4487	2.01842e-10	2.91443e-09
RS02870	transcriptional_regulator	-0.275944	13.0533	13.3716	0.000255465	0.00147286
RS02875	hypothetical_protein	-2.3515	8.2004	497.325	3.63077e-110	2.5239e-107
RS02880	dihydroorotate_oxidase	-0.259917	5.26439	4.51336	0.033631	0.101393
RS02885	peptidoglycan_branched_peptide_synthesis_protein	0.134241	10.5554	4.32466	0.0375639	0.111116
RS02890	UDP-N-acetylmuramoylpentapeptide-lysine_N(6)-alanyltransferase	0.127568	9.88763	3.49799	0.0614433	0.162491
RS02895	UDP-N-acetylmuramoylpentapeptide-lysine_N(6)-alanyltransferase	-0.0435173	10.0177	0.456979	0.499039	0.71759
RS02900	sugar-phosphatase	-0.0296419	9.35819	0.142193	0.70611	0.873838
RS02905	phosphohydrolase	0.0669677	8.31627	0.578248	0.447	0.665984
RS02910	hypothetical_protein	-0.452904	6.56559	11.6543	0.000640558	0.00327411
RS02915	calcium-translocating_P-type_ATPase2C_PMCA-type	-0.50638	10.95	35.4061	2.67653e-09	3.36537e-08
RS02920	phosphoesterase	-0.349584	7.22126	13.4924	0.000239535	0.00139423
RS02925	fructose-bisphosphatase_class_III	0.31664	6.96885	9.93151	0.00162473	0.00755103
RS02930	epoxyqueuosine_reductase	0.174898	7.55468	2.11794	0.145583	0.310568
RS02935	peptide_chain_release_factor_2	-0.0155514	9.02046	0.0467815	0.828761	0.965117
RS02940	cell_division_ATP-binding_protein_FtsE	0.0842194	8.58716	1.11251	0.291537	0.505387
RS02945	ABC_transporter_permease	0.145344	9.78648	3.85584	0.0495732	0.1377
RS02955	IS3_family_transposase	0.00446812	6.73606	0.0018235	0.965939	1
RS02960	thioesterase	0.118604	9.03404	2.5167	0.112646	0.255899
RS02965	hypothetical_protein	-0.190829	8.44474	5.8742	0.0153644	0.0525759
RS02970	acetoin_reductase	-0.342338	10.2666	11.0147	0.000903921	0.00448367
RS02975	bifunctional_DnaQ_family_exonuclease/ATP-dependent_helicase	0.791833	8.00461	93.9575	3.22367e-22	1.41319e-20
RS02980	aspartate_aminotransferase	0.599411	9.07706	55.4302	9.68377e-14	1.91351e-12
RS02985	asparagine--tRNA_ligase	0.805286	9.77958	78.7039	7.21542e-19	2.30989e-17
RS02990	membrane_protein	0.834	8.65361	68.5685	1.22546e-16	3.18881e-15
RS02995	hypothetical_protein	0.80069	9.00769	103.118	3.15794e-24	1.60068e-22
RS03000	hypothetical_protein	-0.460329	6.37225	20.4201	6.21737e-06	4.81594e-05
RS03005	RNase_adaptor_protein_RapZ	-0.315951	7.86029	12.5973	0.000386299	0.00207476
RS03010	YvcK_family_protein	-0.0217669	8.16077	0.0784269	0.779441	0.930973
RS03015	sporulation_protein	0.0499598	8.25796	0.282493	0.595072	0.795367
RS03020	dipeptidase	0.154211	9.33063	4.52485	0.0334061	0.101028
RS03025	zinc_ABC_transporter_substrate-binding_protein_AdcA	1.04531	8.85508	91.3965	1.17586e-21	4.65181e-20
RS03030	50S_ribosomal_protein_L31_type_B	-0.00788931	12.6744	0.0123983	0.911341	1
RS03035	oligoribonuclease	-0.419484	8.85088	15.8288	6.93399e-05	0.000452897
RS03040	adenosine_deaminase	-0.536757	4.52213	13.3543	0.000257837	0.00148478
RS03045	flavodoxin	0.303726	8.32616	12.7357	0.000358744	0.00195198
RS03050	chorismate_mutase	-0.00838646	5.65333	0.00283134	0.957564	1
RS03055	voltage-gated_chloride_channel_protein	0.136164	8.20937	2.39785	0.121502	0.273338
RS03060	50S_ribosomal_protein_L19	0.303273	11.4337	19.5613	9.74216e-06	7.29658e-05
RS03070	hypothetical_protein	-0.54637	0.599137	0.659386	0.416777	0.639438
RS03075	transposase	0.396652	5.99025	6.86504	0.00878982	0.0330025
RS03090	ABC_transporter_permease	0.910791	6.60933	65.3445	6.28847e-16	1.52237e-14
RS03095	ABC_transporter_ATP-binding_protein	0.844589	6.10516	47.5219	5.43922e-12	9.31946e-11
RS03100	peptide_ABC_transporter_permease	0.719933	7.12461	62.3876	2.82092e-15	6.26785e-14
RS03105	DNA-binding_response_regulator	0.132817	5.07733	0.889525	0.345606	0.562392
RS03110	two-component_sensor_histidine_kinase	0.372565	6.57282	13.4033	0.000251179	0.00145332
RS03115	IS3_family_transposase	1.14962	3.54322	29.346	6.05421e-08	6.39041e-07
RS03120	CsbD_family_protein	-1.12952	11.2078	152.096	6.03664e-35	6.52762e-33
RS03125	rod_shape-determining_protein_RodA	-0.0180153	9.48188	0.0555264	0.813712	0.955388
RS03130	hydrolase	-0.0474047	8.01676	0.234557	0.628165	0.825453
RS03135	DNA_gyrase_subunit_B	0.190072	10.0576	8.43797	0.00367467	0.0157287
RS03140	septation_ring_formation_regulator_EzrA	0.289484	10.7345	17.2196	3.32975e-05	0.000227884
RS03145	phosphoserine_phosphatase_SerB	0.0180538	6.07949	0.0202857	0.886742	0.994213
RS03150	NUDIX_hydrolase	-0.498483	6.29994	17.3604	3.09203e-05	0.000213719
RS03155	hypothetical_protein	-0.753515	6.08061	24.7749	6.4432e-07	5.87128e-06
RS03160	enolase	0.147215	14.0794	4.68077	0.0305021	0.0937015
RS03165	endonuclease	0.368742	4.95764	7.2851	0.00695289	0.0270017
RS03170	3-phosphoshikimate_1-carboxyvinyltransferase	-0.39547	8.35328	22.9577	1.65605e-06	1.39902e-05
RS03175	shikimate_kinase	-0.0691352	7.18324	0.471738	0.492189	0.711843
RS03180	LytR_family_transcriptional_regulator	-0.0497507	9.2469	0.427015	0.513457	0.728591
RS03185	RNA_methyltransferase	0.411428	7.13795	14.8522	0.000116275	0.000719842
RS03190	hypothetical_protein	0.74015	5.77857	26.7466	2.31963e-07	2.244e-06
RS03195	acid_phosphatase/phosphotransferase	0.32618	7.8572	13.4681	0.000242648	0.00140898
RS03200	ClbS/DfsB_family_four-helix_bundle_protein	0.595666	7.75558	36.3295	1.66621e-09	2.12803e-08
RS03215	cell_wall_surface_anchor_protein	1.17908	1.66039	5.12207	0.0236234	0.0750336
RS03220	IS3_family_transposase	0.776656	7.13108	66.0873	4.31377e-16	1.06552e-14
RS03230	molecular_chaperone_Hsp33	0.99073	5.25519	54.2146	1.79747e-13	3.47082e-12
RS03235	YSIRK-targeted_surface_antigen_transcriptional_regulator	0.441246	8.2105	18.0843	2.11338e-05	0.000151231
RS03240	cell_wall_surface_anchor_protein	0.107301	6.82744	0.887522	0.34615	0.562392
RS03245	hypothetical_protein	-0.0714437	3.67961	0.0986899	0.753408	0.910011
RS03250	class_C_sortase	-0.0925768	3.9497	0.20767	0.6486	0.838048
RS03255	class_C_sortase	0.244832	3.50426	1.18285	0.276776	0.490383
RS03260	cell_wall_surface_anchor_protein	-0.255942	6.30188	3.97883	0.0460756	0.1302
RS03265	class_C_sortase	0.122349	4.79061	0.771604	0.379721	0.597776
RS03270	hypothetical_protein	-0.179672	0.412268	0.0711502	0.789669	0.937838
RS03275	hypothetical_protein	1.4076	0.0712595	1.80636	0.178946	0.362661
RS03285	hypothetical_protein	-2.0427	0.234433	7.16822	0.00742062	0.0285897
RS03290	serine_hydrolase	-0.392065	9.65543	26.9273	2.11258e-07	2.0615e-06
RS03295	ABC_transporter_ATPase	0.757777	4.84369	28.8477	7.82988e-08	8.08921e-07
RS03300	antibiotic_ABC_transporter_permease	0.764795	4.7419	28.9581	7.39621e-08	7.67377e-07
RS03305	multidrug_ABC_transporter_permease	0.659444	5.19836	25.4606	4.51507e-07	4.19281e-06
RS03310	hypothetical_protein	-0.0520332	2.93464	0.0408297	0.839867	0.972534
RS03315	hypothetical_protein	-0.159101	3.83685	0.798905	0.371421	0.589861
RS03320	SDR_family_oxidoreductase	-0.370138	3.92647	4.44875	0.0349269	0.104459
RS03325	acyl_carrier_protein	-0.160322	2.91299	0.455053	0.499945	0.718655
RS03330	beta-hydroxyacyl-ACP_dehydratase	-0.137517	3.8543	0.442221	0.506052	0.724037
RS03335	ABC_transporter_ATP-binding_protein	0.140224	4.66218	0.576816	0.447563	0.666162
RS03340	ABC_transporter_permease	0.279677	4.88405	3.77506	0.0520221	0.143422
RS03345	hypothetical_protein	0.0703703	6.36809	0.342577	0.558346	0.771165
RS03350	hypothetical_protein	0.193625	5.33874	2.1891	0.13899	0.300991
RS03355	hypothetical_protein	0.0992699	6.63776	0.739621	0.389782	0.610651
RS03360	hypothetical_protein	-0.150127	6.32312	1.58851	0.207539	0.398219
RS03365	hypothetical_protein	-0.0163018	6.06163	0.0207132	0.885563	0.993808
RS03370	hypothetical_protein	1.90462	2.04485	23.3723	1.33485e-06	1.1476e-05
RS03375	hypothetical_protein	1.53562	2.99736	26.3005	2.92218e-07	2.77722e-06
RS03380	peptidase_S8	1.14287	4.47921	54.4915	1.56124e-13	3.03879e-12
RS03390	hypothetical_protein	0.987454	5.03761	49.7084	1.78381e-12	3.17949e-11
RS03395	peptidase_M13	-1.44548	1.76407	15.427	8.5753e-05	0.000551388
RS03400	peptidase_M13	-0.879916	1.60314	5.18293	0.0228098	0.0729849
RS03405	alpha/beta_hydrolase	-0.942628	2.02314	8.27412	0.00402141	0.0169715
RS03420	alpha/beta_hydrolase	-0.469634	2.36309	2.67026	0.102239	0.238846
RS03425	ABC_transporter_permease	-0.61998	2.72603	6.09352	0.0135678	0.047429
RS03430	permease	-0.739903	3.10485	10.4496	0.00122678	0.00588008
RS03440	hypothetical_protein	-0.879834	1.59747	5.18199	0.0228222	0.0729849
RS03445	multidrug_ABC_transporter_ATP-binding_protein	-0.718594	2.89183	6.68806	0.00970606	0.0358886
RS03450	hypothetical_protein	-0.389109	8.13766	24.2762	8.34622e-07	7.43823e-06
RS03455	DNA-entry_nuclease	0.146459	4.95617	0.985554	0.320831	0.540281
RS03460	cytochrome_o_ubiquinol_oxidase	-0.122345	8.61168	2.35211	0.125113	0.279523
RS03465	ABC_transporter_ATP-binding_protein	-0.580124	8.42688	15.28	9.26906e-05	0.000588815
RS03470	iron_export_ABC_transporter_permease_subunit_FetB	-0.48364	9.86419	13.0755	0.000299183	0.00168127
RS03475	phosphate_ABC_transporter_ATPase	-0.4409	5.68393	12.2642	0.000461722	0.00243154
RS03480	LysR_family_transcriptional_regulator	0.0459095	7.69386	0.239355	0.624672	0.822195
RS03485	membrane_protein	0.00853994	4.77752	0.00379041	0.950908	1
RS03490	lactate_dehydrogenase	-0.152055	5.1051	1.4167	0.233947	0.437167
RS03495	glucuronide_permease	-0.826573	1.44133	4.00064	0.045483	0.128717
RS03500	2-dehydro-3-deoxygluconokinase	-0.169906	3.44601	0.673417	0.411863	0.634618
RS03505	beta-glucuronidase	-0.371675	5.26529	6.38133	0.0115327	0.0412331
RS03510	GntR_family_transcriptional_regulator	-0.575719	8.56295	38.2491	6.22663e-10	8.34677e-09
RS03515	2-dehydro-3-deoxyphosphooctonate_aldolase	-0.086026	2.94369	0.104715	0.746243	0.905993
RS03520	uronate_isomerase	-0.369623	4.09742	2.64219	0.10406	0.241813
RS03525	mannonate_dehydratase	-0.327058	3.59929	2.29467	0.129819	0.285483
RS03530	dioxygenase	-0.159744	3.83025	0.755391	0.384775	0.604557
RS03535	haloacid_dehalogenase	-0.0350387	3.61456	0.0321319	0.857738	0.976089
RS03540	beta-hexosamidase	-0.129602	5.19466	0.948867	0.330008	0.550888
RS03545	dipeptidase	-0.813473	9.63675	87.8524	7.05251e-21	2.61966e-19
RS03550	catabolite_control_protein_A	0.503672	9.65303	31.4804	2.01467e-08	2.27456e-07
RS03555	alpha-amylase	-0.136005	7.98316	2.32793	0.127071	0.281185
RS03560	glycosyl_transferase_family_1	-0.0983577	9.2362	1.94115	0.163544	0.337778
RS03565	12C2-diacylglycerol_3-glucosyltransferase	0.0237383	9.90247	0.117818	0.731413	0.896714
RS03570	threonine--tRNA_ligase	0.183128	10.2523	7.60438	0.00582266	0.0231479
RS03575	DNA-binding_response_regulator	0.375504	3.42138	2.57195	0.108773	0.250019
RS03580	hypothetical_protein	-0.73493	7.43282	61.9859	3.45922e-15	7.54487e-14
RS03585	peptidase	-0.280965	10.6313	13.6579	0.000219314	0.00128887
RS03590	glutamine_ABC_transporter_permease	-0.251456	9.84726	8.36147	0.00383261	0.016302
RS03595	glutamine_ABC_transporter_permease	-0.373372	9.17939	19.3163	1.10757e-05	8.21563e-05
RS03600	amino_acid_ABC_transporter_substrate-binding_protein	-0.441993	9.35099	26.5797	2.52892e-07	2.42862e-06
RS03605	arginine_ABC_transporter_ATP-binding_protein	-0.500402	9.25399	37.4773	9.24811e-10	1.21625e-08
RS03610	DNA-binding_response_regulator	-0.261707	8.18484	9.79088	0.0017538	0.00808908
RS03615	cell_wall_metabolism_sensor_histidine_kinase_VicK	-0.110232	9.11214	2.32239	0.127524	0.281687
RS03620	metallo-hydrolase	0.0464874	8.5795	0.408403	0.522781	0.736922
RS03625	hypothetical_protein	0.190428	8.14406	4.2139	0.040094	0.117035
RS03630	ribonuclease_3	-0.0983779	8.27347	1.12592	0.288648	0.50145
RS03635	chromosome_segregation_protein_SMC	0.488232	10.1394	46.9174	7.40434e-12	1.25538e-10
RS03640	haloacid_dehalogenase	-0.137966	7.74675	2.29448	0.129834	0.285483
RS03645	haloacid_dehalogenase	0.0628499	8.13033	0.542596	0.461359	0.68136
RS03650	signal_recognition_particle-docking_protein_FtsY	0.0296005	9.12278	0.163938	0.685557	0.861549
RS03655	group_II_intron_reverse_transcriptase/maturase	-0.478153	5.88842	15.5872	7.87866e-05	0.000510487
RS03660	phosphate_ABC_transporter_substrate-binding_protein	-0.653541	10.1648	90.4829	1.86587e-21	7.32204e-20
RS03665	ABC_transporter_permease	-1.00913	10.1731	158.963	1.90644e-36	2.37865e-34
RS03670	hypothetical_protein	-1.0964	7.66808	127.295	1.60109e-29	1.16282e-27
RS03675	N52CN10-methylene_tetrahydromethanopterin_reductase	0.145006	5.13622	0.919705	0.337552	0.560782
RS03680	S1_RNA-binding_protein	0.470592	9.13452	33.786	6.15194e-09	7.42812e-08
RS03685	SprT_family_protein	0.45221	7.13882	23.258	1.41662e-06	1.20935e-05
RS03690	phage_shock_protein_C	-0.847491	10.8599	127.617	1.36137e-29	1.0037e-27
RS03695	HPr_kinase/phosphorylase	-0.0342463	9.87815	0.278717	0.597544	0.796397
RS03700	prolipoprotein_diacylglyceryl_transferase	0.0892262	9.52009	1.62491	0.202409	0.390687
RS03705	DUF948_domain_containing_protein	0.0206689	9.1319	0.0854494	0.770044	0.923825
RS03710	hypothetical_protein	-0.236441	10.348	7.71083	0.00548906	0.0220378
RS03715	hypothetical_protein	0.480553	11.0597	38.3768	5.8322e-10	7.86135e-09
RS03720	peptidase_U32	0.485125	6.3907	9.81658	0.00172946	0.00798439
RS03725	collagenase-like_protease	0.582863	7.56896	12.7764	0.000351017	0.00191485
RS03730	hypothetical_protein	-0.246024	7.4241	4.70314	0.0301076	0.0926653
RS03735	hypothetical_protein	-0.55516	6.12348	24.7171	6.63915e-07	6.0106e-06
RS03740	manganese_transporter	-0.357997	9.29224	16.9367	3.86478e-05	0.000260832
RS03745	bifunctional_diaminohydroxyphosphoribosylaminopyrimidine_deaminase/5-amino-6-(5-phosphoribosylamino)uracil_reductase	-0.777047	6.57242	16.7991	4.15524e-05	0.000278888
RS03750	riboflavin_synthase	-0.724677	5.25984	11.3583	0.00075112	0.00377188
RS03755	bifunctional_32C4-dihydroxy-2-butanone-4-phosphate_synthase/GTP_cyclohydrolase_II	-0.657462	6.8094	13.9783	0.000184931	0.00109741
RS03760	62C7-dimethyl-8-ribityllumazine_synthase	-0.767848	6.12199	28.2479	1.06732e-07	1.07975e-06
RS03765	lysine--tRNA_ligase	0.501333	10.0843	47.0569	6.89554e-12	1.17321e-10
RS03770	haloacid_dehalogenase	0.413658	7.93953	21.2388	4.05473e-06	3.26121e-05
RS03775	histidine_phosphatase_family_protein	0.00451357	6.84056	0.00166763	0.967426	1
RS03780	aminoacyl-tRNA_deacylase	0.169711	5.97529	1.47229	0.224984	0.423674
RS03785	epimerase	0.122741	5.82347	0.584901	0.444398	0.664548
RS03790	N-acetylmuramoyl-L-alanine_amidase	0.313063	8.76022	12.9942	0.00031245	0.00173361
RS03795	ECF_transporter_S_component	-0.316357	7.83925	13.4311	0.000247492	0.00143369
RS03800	hypothetical_protein	-0.263014	9.3083	8.10457	0.00441539	0.0183792
RS03805	oligoendopeptidase_F	-0.516288	9.45181	41.8843	9.68348e-11	1.43658e-09
RS03810	phosphoenolpyruvate_carboxylase	0.395633	10.4203	28.8038	8.00947e-08	8.25722e-07
RS03815	cell_division_protein	0.101315	8.76081	1.39188	0.238087	0.443203
RS03820	elongation_factor_Tu	0.0418784	14.9582	0.413902	0.519996	0.734271
RS03825	triose-phosphate_isomerase	0.119638	12.3279	3.9491	0.0468963	0.131601
RS03830	22C3-bisphosphoglycerate-dependent_phosphoglycerate_mutase	0.210301	13.1705	7.82225	0.00516069	0.0208918
RS03835	penicillin-binding_protein_2B	-0.545388	10.1695	64.8201	8.20564e-16	1.96693e-14
RS03840	recombination_protein_RecR	-0.159461	8.9935	4.03081	0.0446764	0.126983
RS03845	D-alanine--D-alanine_ligase	0.347571	10.1559	28.3476	1.01373e-07	1.03197e-06
RS03850	UDP-N-acetylmuramoyl-tripeptide--D-alanyl-D-alanine_ligase	-0.298999	9.48175	17.8699	2.36537e-05	0.000167295
RS03855	MFS_transporter	0.712962	6.22344	34.5355	4.18547e-09	5.14305e-08
RS03860	membrane_protein	0.744771	5.83674	39.2604	3.70884e-10	5.15635e-09
RS03865	cell_surface_protein	0.173735	4.8236	1.39945	0.236815	0.441342
RS03870	peptide_chain_release_factor_3	0.593518	9.03579	49.7829	1.71737e-12	3.07233e-11
RS03875	helicase	-0.330342	7.45748	13.1262	0.000291193	0.0016457
RS03880	ABC_transporter_ATP-binding_protein	0.718084	5.77971	15.1169	0.000101053	0.000632035
RS03885	ABC_transporter_permease	1.12853	5.97569	64.5343	9.4867e-16	2.26286e-14
RS03890	hypothetical_protein	0.69255	6.80147	20.7352	5.27387e-06	4.16602e-05
RS03895	RNA_helicase	0.346048	11.4688	26.9259	2.11403e-07	2.0615e-06
RS03900	hypothetical_protein	0.453199	5.98617	16.6767	4.43227e-05	0.000296664
RS03905	methyltransferase	0.167656	6.14479	1.89932	0.168154	0.344675
RS03910	1-acyl-sn-glycerol-3-phosphate_acyltransferase	0.0548267	8.88615	0.550376	0.458164	0.677637
RS03915	competence_protein_CelA	-0.403073	0.208276	0.29106	0.589542	0.79271
RS03920	DNA_internalization-related_competence_protein_ComEC/Rec2	-0.143573	3.37672	0.511747	0.474383	0.695495
RS03925	haloacid_dehalogenase	-0.319603	6.1027	6.68672	0.00971337	0.0358886
RS03930	LacI_family_transcriptional_regulator	-0.338445	7.08219	13.0313	0.000306334	0.00170943
RS03935	hypothetical_protein	-0.511943	8.23947	29.3987	5.89186e-08	6.23256e-07
RS03940	methyltransferase	0.0751447	5.28937	0.332235	0.564346	0.77203
RS03945	DNA_polymerase_III_subunit_delta	0.155438	7.91201	2.74522	0.0975456	0.232903
RS03950	superoxide_dismutase_[Mn/Fe]	-0.273764	11.3357	8.27228	0.00402548	0.016974
RS03955	transcription_antiterminator_BglG	0.279852	2.89601	1.15553	0.282395	0.493405
RS03960	PTS_beta-glucoside_transporter_subunit_EIIBCA	0.795824	3.30927	12.9499	0.000319934	0.00176909
RS03965	6-phospho-beta-glucosidase	-0.0110685	5.4503	0.00662343	0.935136	1
RS03970	PucR_family_transcriptional_regulator	-0.394579	6.87955	13.0327	0.000306097	0.00170943
RS03975	glycerate_kinase	1.03071	3.21536	20.0132	7.69112e-06	5.84766e-05
RS03980	gluconate_proton_symporter	0.442426	3.87497	2.36551	0.124043	0.277714
RS03985	hypothetical_protein	-0.0392274	7.16053	0.172147	0.678211	0.859634
RS03995	tRNA_preQ1(34)_S-adenosylmethionine_ribosyltransferase-isomerase_QueA	0.276573	8.63229	6.31088	0.0119999	0.0427465
RS04000	membrane_protein	-0.907851	8.43089	15.2705	9.31582e-05	0.000591014
RS04005	glucosamine-6-phosphate_deaminase	-0.241554	8.88706	4.46416	0.0346131	0.103839
RS04010	glutathione-dependent_reductase	-0.856011	7.22504	76.646	2.04523e-18	6.18142e-17
RS04015	16S_rRNA_pseudouridine(516)_synthase	0.165628	5.27614	1.45271	0.228093	0.428533
RS04020	MFS_transporter	0.597979	10.2993	26.802	2.25406e-07	2.18491e-06
RS04025	competence_protein_CoiA	-0.763796	4.03788	19.0404	1.27981e-05	9.393e-05
RS04030	oligoendopeptidase_F	-0.206018	9.31529	5.53067	0.0186859	0.0616027
RS04035	haloacid_dehalogenase	-0.149471	6.22788	1.36277	0.243058	0.451076
RS04040	O-methyltransferase	0.00271762	8.28147	0.00063425	0.979908	1
RS04045	foldase	-0.31749	10.4515	17.2922	3.205e-05	0.000219965
RS04050	hypothetical_protein	0.240729	7.66402	6.23657	0.0125139	0.0442212
RS04055	alanine--tRNA_ligase	0.426209	10.3069	44.1615	3.02376e-11	4.67098e-10
RS04060	membrane_protein	0.318511	7.41987	10.3655	0.00128389	0.00613092
RS04065	glycosyl_transferase	-0.765543	5.90393	35.7075	2.2928e-09	2.89786e-08
RS04070	hypothetical_protein	-0.242278	0.262057	0.11026	0.739848	0.901647
RS04075	hypothetical_protein	-0.337818	1.40323	0.577783	0.447182	0.666051
RS04080	transcriptional_regulator	0.156936	0.882421	0.0839122	0.772064	0.924917
RS04085	membrane_protein	-0.239565	3.17125	1.22328	0.268718	0.482541
RS04090	energy-coupled_thiamine_transporter_ThiT	0.481329	7.23434	21.4586	3.61557e-06	2.93222e-05
RS04095	ribonucleoside-diphosphate_reductase	-0.386118	11.5467	39.6358	3.06026e-10	4.29142e-09
RS04100	ribonucleoside-diphosphate_reductase_subunit_alpha	-0.609125	12.6951	85.6835	2.11171e-20	7.44607e-19
RS04105	NrdH-redoxin	-0.718574	9.89252	83.2841	7.10701e-20	2.41837e-18
RS04110	phosphocarrier_protein_HPr	0.413593	11.8759	45.001	1.96931e-11	3.1316e-10
RS04115	phosphoenolpyruvate--protein_phosphotransferase	0.429991	13.2598	37.5596	8.86609e-10	1.17235e-08
RS04120	NADP-dependent_glyceraldehyde-3-phosphate_dehydrogenase	0.0743288	11.5017	0.781458	0.376696	0.594358
RS04125	polysaccharide_deacetylase	0.458866	7.61882	19.539	9.85659e-06	7.36746e-05
RS04130	RNA_helicase	-0.0397444	9.10938	0.268301	0.604474	0.803653
RS04135	uridine_kinase	0.502416	8.2974	29.2392	6.39728e-08	6.72336e-07
RS04140	hypothetical_protein	-0.245148	8.04976	7.84238	0.00510353	0.0207294
RS04145	DNA_polymerase_III_subunit_gamma/tau	0.245161	9.92459	11.9191	0.000555619	0.00287069
RS04150	membrane_protein	-0.0788436	5.64345	0.463362	0.496057	0.715258
RS04155	bifunctional_biotin--[acetyl-CoA-carboxylase]_synthetase/biotin_operon_repressor	-0.464845	7.24236	18.1301	2.06315e-05	0.000148072
RS04160	S-adenosylmethionine_synthase	0.189223	9.36404	7.17052	0.00741114	0.0285758
RS04165	hypothetical_protein	0.029811	5.31868	0.0555703	0.813639	0.955388
RS04170	hypothetical_protein	-0.596716	3.32165	4.5966	0.0320353	0.0974884
RS04175	hypothetical_protein	-0.109708	2.73001	0.0975965	0.754733	0.910169
RS04180	hypothetical_protein	0.620171	2.19085	3.66664	0.055512	0.151583
RS04185	ABC_transporter_permease	-0.316067	1.90987	0.846722	0.357481	0.574094
RS04190	ABC_transporter_ATP-binding_protein	0.367683	2.79365	1.91236	0.166701	0.342988
RS04195	ABC_transporter	0.652682	2.37376	1.97169	0.160269	0.33285
RS04200	thiaminase_II	0.136575	2.2304	0.100466	0.751271	0.909148
RS04205	bifunctional_hydroxymethylpyrimidine_kinase/phosphomethylpyrimidine_kinase	0.667358	2.78909	6.50636	0.010749	0.038975
RS04210	hydroxyethylthiazole_kinase	0.789192	2.43941	6.40153	0.0114022	0.0410076
RS04215	thiamine_phosphate_synthase	0.27603	2.80875	1.15424	0.282662	0.493696
RS04220	UDP-N-acetylglucosamine_1-carboxyvinyltransferase	0.361406	9.66127	26.9457	2.09253e-07	2.04874e-06
RS04225	RimJ/RimL_family_protein_N-acetyltransferase	-0.0966803	6.7403	0.840756	0.359181	0.575493
RS04230	hypothetical_protein	0.122328	8.1345	2.13853	0.14364	0.307502
RS04235	methionine_aminopeptidase	0.197679	8.3646	6.17057	0.0129892	0.0458012
RS04240	hypothetical_protein	0.399394	8.78442	27.3665	1.68323e-07	1.66475e-06
RS04245	sugar_translocase	0.0059937	4.9875	0.00122398	0.972091	1
RS04250	queuosine_transporter_QueT	-0.217004	10.5654	8.96753	0.0027482	0.0120772
RS04255	DNA_ligase_(NAD(+))_LigA	0.209956	8.75813	8.18624	0.00422094	0.0176756
RS04260	diacylglycerol_kinase	0.384331	7.78413	17.4762	2.90923e-05	0.000202523
RS04265	type_I_pullulanase	0.459764	9.57314	44.3457	2.75214e-11	4.31997e-10
RS04270	glycogen-branching_enzyme	0.355627	6.86922	8.28144	0.00400524	0.0169327
RS04275	glucose-1-phosphate_adenylyltransferase	0.28304	6.05443	6.14765	0.0131587	0.046231
RS04280	glucose-1-phosphate_adenylyltransferase_subunit_GlgD	0.0502946	5.95686	0.140786	0.707501	0.874463
RS04285	starch_synthase	0.248586	6.5088	4.19422	0.040562	0.117923
RS04290	F0F1_ATP_synthase_subunit_C	-0.331442	10.928	25.8585	3.6738e-07	3.46448e-06
RS04295	ATP_synthase_subunit_A	-0.220086	12.03	12.8133	0.000344168	0.00189021
RS04300	ATP_synthase_subunit_B	-0.241587	11.0152	9.94395	0.00161379	0.00750874
RS04305	F0F1_ATP_synthase_subunit_delta	-0.196183	11.4958	6.66187	0.00984974	0.0362548
RS04310	ATP_synthase_subunit_alpha	-0.190192	13.0122	10.1007	0.00148214	0.00694136
RS04315	ATP_synthase_subunit_gamma	-0.148185	12.301	5.39116	0.020239	0.065963
RS04320	ATP_synthase_subunit_beta	-0.154861	13.0037	5.96506	0.0145921	0.0503226
RS04325	F0F1_ATP_synthase_subunit_epsilon	-0.0176661	12.0844	0.0561247	0.812729	0.955348
RS04330	membrane_protein	-0.384374	5.7848	7.45135	0.00633888	0.0248549
RS04335	UDP-N-acetylglucosamine_1-carboxyvinyltransferase	-0.143788	9.79981	4.26554	0.0388928	0.114008
RS04340	DNA-directed_RNA_polymerase_subunit_beta	-0.00304662	8.45767	0.00091445	0.975876	1
RS04345	DNA-entry_nuclease	-0.0749385	8.01064	0.707007	0.400439	0.622321
RS04350	phenylalanine--tRNA_ligase_subunit_alpha	0.189877	8.58676	5.93529	0.0148406	0.0510709
RS04355	GNAT_family_N-acetyltransferase	0.195799	7.98005	5.7502	0.0164868	0.0556729
RS04360	phenylalanine--tRNA_ligase_subunit_beta	0.267542	9.88994	13.6761	0.000217205	0.00127802
RS04365	hypothetical_protein	-1.10472	7.5334	76.0998	2.69679e-18	8.00156e-17
RS04370	ATP-dependent_nuclease_subunit_B	0.292505	8.41877	13.2965	0.000265897	0.001521
RS04375	helicase-exonuclease_AddAB_subunit_AddA	0.277563	9.39174	16.2558	5.53387e-05	0.000365371
RS04380	magnesium_transporter	0.402708	8.39139	27.4939	1.57589e-07	1.56662e-06
RS04385	tRNA_uridine-5-carboxymethylaminomethyl(34)_synthesis_GTPase_MnmE	0.00228976	8.63113	0.000849163	0.976753	1
RS04390	multidrug_ABC_transporter_ATP-binding_protein	0.00732865	8.4686	0.00915389	0.923778	1
RS04395	pyruvate_dehydrogenase_E1_subunit_alpha	0.282036	11.9189	7.6953	0.00553648	0.0221915
RS04400	pyruvate_dehydrogenase_subunit_beta	0.281961	11.2764	9.71863	0.0018241	0.00839741
RS04405	branched-chain_alpha-keto_acid_dehydrogenase_subunit_E2	0.0845807	11.1087	0.912602	0.339425	0.562392
RS04410	dihydrolipoyl_dehydrogenase	0.114778	12.1732	2.3199	0.127728	0.28187
RS04415	lipoate--protein_ligase_A	0.541982	8.4552	39.2736	3.68398e-10	5.13646e-09
RS04420	group_II_intron_reverse_transcriptase/maturase	-0.71992	5.9647	26.4744	2.67052e-07	2.55802e-06
RS04425	glutamine_amidotransferase	0.301416	8.39512	13.0265	0.000307114	0.00171182
RS04430	UDP-N-acetylmuramyl_peptide_synthase	-0.102584	9.08578	2.07901	0.149337	0.316971
RS04435	membrane_protein	-0.0825083	8.68385	1.15861	0.281753	0.492703
RS04440	hypothetical_protein	0.0589505	8.51674	0.443371	0.5055	0.723672
RS04445	phosphoglucosamine_mutase	0.199924	10.1503	9.37762	0.0021965	0.0098873
RS04450	hypothetical_protein	-0.41218	5.07743	7.28508	0.00695296	0.0270017
RS04455	hypothetical_protein	-0.889179	6.18169	62.8335	2.2494e-15	5.09097e-14
RS04460	coproporphyrinogen_III_oxidase	0.122818	8.37372	2.1729	0.140461	0.303501
RS04465	acyl-ACP_thioesterase	0.575225	7.14484	33.7437	6.28723e-09	7.55399e-08
RS04470	haloacid_dehalogenase	0.293335	7.59758	6.39726	0.0114297	0.0410455
RS04475	membrane_protein	0.452777	8.19528	21.1179	4.31884e-06	3.44516e-05
RS04480	type_II_CRISPR_RNA-guided_endonuclease_Cas9	1.04559	7.44782	91.4293	1.15651e-21	4.61277e-20
RS04485	subtype_II_CRISPR-associated_endonuclease_Cas1	0.983773	5.66326	52.4852	4.33512e-13	8.14383e-12
RS04490	CRISPR-associated_endonuclease_Cas2	1.00511	3.9567	21.4675	3.59885e-06	2.92354e-05
RS04495	type_II-A_CRISPR-associated_protein_Csn2	0.755077	6.11598	45.4758	1.54536e-11	2.54045e-10
RS04505	nucleoside-diphosphate_kinase	-1.1459	11.1624	199.504	2.67974e-45	5.21584e-43
RS04510	elongation_factor_4	-0.0677804	10.3205	1.09123	0.296199	0.511464
RS04515	hypothetical_protein	0.744226	5.14829	26.0366	3.35013e-07	3.16539e-06
RS04520	phosphohydrolase	-0.548553	7.0887	29.4974	5.59906e-08	5.96171e-07
RS04525	N-acetyltransferase	-0.354437	7.06812	15.315	9.09915e-05	0.000579535
RS04530	peptide-methionine_(R)-S-oxide_reductase	-0.350215	7.65885	12.2787	0.000458165	0.00241542
RS04535	haloacid_dehalogenase	-0.664672	8.63979	54.1118	1.89404e-13	3.64285e-12
RS04540	hypothetical_protein	-0.21181	6.91074	4.00599	0.0453388	0.128416
RS04545	hypothetical_protein	-0.459495	7.49355	24.0265	9.50165e-07	8.39111e-06
RS04550	TVP38/TMEM64_family_protein	-0.147756	7.62912	2.34848	0.125405	0.279655
RS04555	hypothetical_protein	-0.197294	10.4033	4.14942	0.0416488	0.120418
RS04560	multidrug_ABC_transporter_ATP-binding_protein	-0.206645	9.4576	7.06162	0.00787526	0.0299149
RS04565	GntR_family_transcriptional_regulator	-0.224219	8.72934	6.36512	0.0116385	0.0415808
RS04570	DNA_polymerase_III_subunit_alpha	-0.190171	8.07445	5.77009	0.0163012	0.0551729
RS04575	6-phosphofructokinase	0.355592	11.5665	28.277	1.05139e-07	1.06808e-06
RS04580	pyruvate_kinase	0.390768	12.8234	37.5424	8.9446e-10	1.17952e-08
RS04585	signal_peptidase_I	-0.0149277	8.63316	0.0382033	0.845035	0.972534
RS04590	glutamine--fructose-6-phosphate_aminotransferase	-2.38571	11.9578	181.844	1.91784e-41	3.01039e-39
RS04595	hypothetical_protein	1.32739	6.64963	156.955	5.23642e-36	6.21474e-34
RS04600	amino_acid_ABC_transporter_permease	-0.379937	6.94258	15.3435	8.96299e-05	0.000573113
RS04605	amino_acid_ABC_transporter_ATP-binding_protein	-0.181863	7.4556	3.3251	0.0682299	0.176131
RS04610	glutamine_ABC_transporter_substrate-binding_protein	-0.266791	8.45599	9.2614	0.00234034	0.0104863
RS04615	30S_ribosomal_protein_S20	-0.181797	12.229	2.68821	0.101093	0.238653
RS04620	type_I_pantothenate_kinase	-0.168367	7.05685	2.19476	0.138481	0.300155
RS04625	methyltransferase	0.798907	6.78058	63.7064	1.44414e-15	3.3954e-14
RS04630	cytidine_deaminase	0.61049	6.55222	30.0141	4.28907e-08	4.62764e-07
RS04635	BMP_family_ABC_transporter_substrate-binding_protein	0.197849	9.90448	5.91847	0.014983	0.0514882
RS04640	sugar_ABC_transporter_ATP-binding_protein	1.25423	8.55006	207.399	5.07376e-47	1.07343e-44
RS04645	ABC_transporter_permease	1.44134	8.80202	284.728	7.00467e-64	2.27231e-61
RS04650	ABC_transporter_permease	1.42179	9.50458	208.057	3.64529e-47	8.44665e-45
RS04655	NADH_oxidase	0.931544	9.71449	60.8084	6.2908e-15	1.33673e-13
RS04660	L-lactate_dehydrogenase	0.158233	12.8992	4.1985	0.0404598	0.11775
RS04665	DNA_gyrase_subunit_A	0.445918	9.95236	43.2238	4.88235e-11	7.44749e-10
RS04670	class_A_sortase	0.47878	8.72327	42.3843	7.49904e-11	1.12973e-09
RS04675	glyoxalase	0.546899	8.13734	34.799	3.65566e-09	4.51483e-08
RS04680	hypothetical_protein	-2.0267	10.3125	622.693	1.94121e-137	2.36148e-134
RS04685	sodium_proton_antiporter	0.790399	8.26844	61.8512	3.70412e-15	7.97532e-14
RS04690	hypothetical_protein	2.36663	-0.696101	1.77613	0.182625	0.36346
RS04695	hypothetical_protein	0.536351	0.0175459	0.367595	0.544318	0.75615
RS04700	hypothetical_protein	-0.540376	0.0294944	0.426796	0.513565	0.728591
RS04705	cell_division_protein_FtsK	-0.769126	-0.170915	0.667153	0.414046	0.635991
RS04710	Cro/Cl_family_transcriptional_regulator	-0.797568	0.205258	1.16733	0.27995	0.490929
RS04715	hypothetical_protein	-1.98125	-0.49577	2.54316	0.110773	0.252812
RS04720	hypothetical_protein	0.616838	-0.506651	0.216865	0.641439	0.833902
RS04725	hypothetical_protein	-0.315588	4.85886	5.54122	0.0185737	0.0613158
RS04730	antirestriction_protein_ArdA	-0.242241	0.251832	0.110228	0.739885	0.901647
RS04735	hypothetical_protein	-0.1409	4.66539	1.03651	0.308636	0.52548
RS04740	conjugal_transfer_protein	-0.409804	0.548568	0.436481	0.508826	0.726723
RS04745	ATP/GTP-binding_protein	0.200945	0.92357	0.10115	0.750453	0.908837
RS04750	hypothetical_protein	1.49203	0.678598	4.86988	0.0273295	0.0851377
RS04755	peptidase_P60	0.879304	-0.115774	0.751851	0.385891	0.605919
RS04760	conjugal_transfer_protein	-1.00458	0.154749	1.74241	0.186834	0.370318
RS04765	tetracycline_resistance_ribosomal_protection_protein_Tet(M)	0.591193	7.35759	34.4914	4.28137e-09	5.24764e-08
RS04770	transcriptional_regulator	1.78441	3.65945	72.5033	1.66755e-17	4.71763e-16
RS04775	DNA-directed_RNA_polymerase_sigma-70_factor	2.85519	-0.600487	2.66416	0.102632	0.238846
RS04780	hypothetical_protein	1.06619	-0.0486689	1.18256	0.276836	0.490383
RS04785	hypothetical_protein	-0.300096	5.06874	5.37506	0.0204266	0.0663968
RS04790	site-specific_integrase	-0.0891907	6.42659	0.369832	0.543096	0.75615
RS04795	GMP_synthase_(glutamine-hydrolyzing)	0.251891	10.6409	13.059	0.000301833	0.00169207
RS04800	GntR_family_transcriptional_regulator	-0.261276	7.45778	6.47476	0.0109417	0.0395267
RS04805	FADH(2)-oxidizing_methylenetetrahydrofolate--tRNA-(uracil(54)-C(5))-methyltransferase_TrmFO	-0.256284	9.83493	14.3803	0.000149356	0.000909592
RS04810	N-acetyltransferase	-0.459556	6.79301	12.8255	0.000341918	0.001882
RS04815	O-sialoglycoprotein_endopeptidase	-0.439792	8.05998	30.8755	2.75118e-08	3.02696e-07
RS04825	peptidase_S41	-0.495243	3.22313	5.58667	0.0180976	0.0599477
RS04830	ABC_transporter_ATP-binding_protein	-0.377401	5.57631	6.7007	0.00963749	0.0357712
RS04835	ABC_transporter_permease	-0.204013	7.24254	5.45777	0.0194815	0.0638794
RS04840	DNA-binding_response_regulator	-0.998581	6.38003	70.0299	5.84135e-17	1.57911e-15
RS04845	sensor_histidine_kinase	-0.732832	7.33303	60.1998	8.5701e-15	1.81314e-13
RS04850	tyrosine_recombinase_XerS	-0.37965	6.47608	9.59797	0.00194793	0.00888343
RS04855	ABC_transporter_substrate-binding_protein	-0.0481213	4.62168	0.0939749	0.759183	0.914316
RS04860	membrane_protein	-0.0999218	6.30872	0.784272	0.375838	0.593262
RS04865	DNA-binding_protein	-0.0240518	5.37841	0.0215376	0.883324	0.992898
RS04870	signal_recognition_particle_protein	-0.0957292	9.7541	1.8369	0.175315	0.357405
RS04875	DNA-binding_protein	-0.124897	7.02739	1.6163	0.203608	0.392534
RS04880	two-component_sensor_histidine_kinase	-0.89784	9.43343	147.299	6.74953e-34	6.316e-32
RS04885	DNA-binding_response_regulator	-5.83972	7.41248	1723.15	0	0
RS04890	aminopeptidase	-0.315587	11.7328	22.1693	2.49631e-06	2.05882e-05
RS04895	phosphate_transport_system_regulatory_protein_PhoU	0.231179	9.18515	5.54891	0.0184922	0.0610883
RS04900	phosphate_ABC_transporter_ATP-binding_protein	0.334872	8.7726	14.466	0.000142712	0.000872406
RS04905	phosphate_ABC_transporter_ATP-binding_protein	0.405367	8.48877	19.4154	1.05157e-05	7.82407e-05
RS04910	phosphate_ABC_transporter2C_permease_protein_PstA	0.333022	8.4357	12.7114	0.000363424	0.00196855
RS04915	phosphate_ABC_transporter_permease_subunit_PstC	0.328521	8.57069	15.6701	7.54049e-05	0.000490535
RS04920	phosphate_ABC_transporter_substrate-binding_protein	0.339084	7.95491	14.2715	0.000158245	0.000956546
RS04925	23S_rRNA_methyltransferase	0.222273	7.00697	4.90181	0.0268286	0.0836846
RS04930	myo-inositol-1(or_4)-monophosphatase	0.513581	9.23037	50.621	1.12039e-12	2.04187e-11
RS04935	hypothetical_protein	0.309279	6.88539	9.60297	0.00194263	0.00886759
RS04940	regulatory_protein_Spx	0.00264103	8.53334	0.000926376	0.975719	1
RS04945	bifunctional_riboflavin_kinase/FMN_adenylyltransferase	0.309497	8.60653	10.7022	0.00107009	0.00520706
RS04950	tRNA_pseudouridine(55)_synthase_TruB	0.099497	8.39453	1.1496	0.283632	0.494856
RS04955	N-acetyltransferase	0.355898	7.05402	10.1497	0.00144325	0.00677229
RS04960	hypothetical_protein	0.231776	7.92625	5.72423	0.0167324	0.0563069
RS04965	type_I_restriction_endonuclease_subunit_S	-0.00318115	6.79782	0.000743896	0.978241	1
RS04970	CPBP_family_intramembrane_metalloprotease	0.501676	7.16424	23.1618	1.48926e-06	1.2647e-05
RS04975	ABC_transporter_permease	0.183751	7.43735	3.34919	0.0672381	0.17431
RS04980	ABC_transporter_ATP-binding_protein	0.259892	6.26783	5.14803	0.0232727	0.0741617
RS04985	DNA_topoisomerase_I	0.588838	9.61346	70.7567	4.04105e-17	1.11726e-15
RS04990	DNA_processing_protein_DprA	-0.339644	1.53821	0.720989	0.39582	0.617129
RS04995	ferrichrome_ABC_transporter_substrate-binding_protein	-0.452513	7.44458	14.4423	0.000144522	0.000881256
RS05000	iron_ABC_transporter_ATP-binding_protein	-0.37349	6.19326	8.0851	0.00446307	0.0185301
RS05005	hypothetical_protein	-0.445204	6.69442	15.7771	7.12586e-05	0.000464805
RS05010	iron_ABC_transporter_permease	-0.392646	6.80107	12.5339	0.000399629	0.00213927
RS05015	galactoside_O-acetyltransferase	-0.56982	8.03092	48.3756	3.51919e-12	6.15984e-11
RS05020	ribonuclease_HII	-0.634765	8.27043	38.0183	7.00856e-10	9.31793e-09
RS05025	ribosome_biogenesis_GTPase_YlqF	-0.634608	8.18606	66.4044	3.67282e-16	9.1651e-15
RS05030	cell_surface_protein	-1.25851	8.14027	88.4201	5.29301e-21	1.98121e-19
RS05035	hypothetical_protein	-0.240317	7.09257	4.90962	0.0267075	0.0834139
RS05040	DNA-binding_response_regulator	-0.156272	5.98535	1.13605	0.286488	0.49841
RS05045	sensor_histidine_kinase	-0.275529	7.25586	9.15154	0.00248509	0.0110433
RS05055	hypothetical_protein	-0.537406	5.6323	21.3749	3.77686e-06	3.05793e-05
RS05060	hypothetical_protein	-0.483969	6.28101	21.656	3.26194e-06	2.65873e-05
RS05065	hypothetical_protein	-0.641592	4.86631	16.7383	4.29071e-05	0.000287584
RS05070	hypothetical_protein	-0.648674	5.0158	24.1635	8.84932e-07	7.87217e-06
RS05080	hypothetical_protein	-0.57325	5.41798	13.2426	0.000273655	0.00156108
RS05085	hypothetical_protein	-0.105703	6.41655	0.779961	0.377153	0.594887
RS05090	hypothetical_protein	-0.154173	7.27943	2.15775	0.141852	0.305016
RS05095	type_VII_secretion_protein_EssC	0.197316	8.49598	5.26311	0.021782	0.070286
RS05100	type_VII_secretion_protein_EssB	0.439724	6.29536	12.0821	0.000509075	0.00265505
RS05105	hypothetical_protein	0.289879	3.61485	2.41577	0.120119	0.270351
RS05110	type_VII_secretion_protein_EssA	0.322998	4.67784	4.1422	0.0418269	0.120717
RS05115	ABC_transporter_permease	0.0598598	8.16195	0.404232	0.524912	0.738214
RS05120	hypothetical_protein	-0.150983	5.71667	1.3179	0.250969	0.46148
RS05125	hypothetical_protein	-0.117101	4.55591	0.644427	0.422112	0.644089
RS05130	carbamoyl_phosphate_synthase_large_subunit	1.13155	6.49679	36.9354	1.22109e-09	1.58449e-08
RS05135	carbamoyl_phosphate_synthase_small_subunit	1.36492	4.75117	29.0371	7.10048e-08	7.41436e-07
RS05140	aspartate_carbamoyltransferase	1.07977	4.35462	13.2209	0.000276847	0.0015756
RS05145	dihydroorotase	1.61432	6.45429	86.4021	1.46827e-20	5.37189e-19
RS05150	orotate_phosphoribosyltransferase	1.35096	4.95483	45.3001	1.6904e-11	2.75101e-10
RS06330	bifunctional_metallophosphatase/5-nucleotidase	1.35728	6.19273	138.748	5.00115e-32	4.19579e-30
RS06335	peptide_deformylase	0.0644916	9.30818	0.553585	0.456856	0.675909
RS06340	glutamate_dehydrogenase	0.0335384	9.14778	0.123474	0.725297	0.891011
RS06345	membrane_protein	-0.726106	11.0285	98.6623	2.99442e-23	1.42852e-21
RS06350	multidrug_ABC_transporter_ATP-binding_protein	0.264813	8.64883	9.68288	0.00185993	0.00853812
RS06355	multidrug_ABC_transporter_ATP-binding_protein	0.289582	8.42682	15.1659	9.84648e-05	0.000619031
RS06365	antibiotic_ABC_transporter_ATP-binding_protein	0.280669	8.55117	12.8477	0.000337894	0.00186205
RS06370	CCA_tRNA_nucleotidyltransferase	0.325027	7.77542	13.0741	0.000299412	0.00168127
RS06375	hypothetical_protein	0.311993	9.38492	16.5047	4.85304e-05	0.000323049
RS06380	transposase	0.103284	8.02046	1.6385	0.200531	0.388899
RS06385	hypothetical_protein	-0.385604	6.13143	11.7651	0.000603506	0.00309448
RS06390	hypothetical_protein	-0.843405	7.89537	94.851	2.05265e-22	9.16346e-21
RS06395	PTS_fructose_transporter_subunit_IIC	-2.63277	8.50653	321.314	7.49331e-72	2.60446e-69
RS06400	1-phosphofructokinase	-2.69835	6.70687	190.504	2.46732e-43	4.44665e-41
RS06405	DeoR_family_transcriptional_regulator	-2.31398	6.38003	154.262	2.02988e-35	2.29707e-33
RS06410	peptidoglycan_branched_peptide_synthesis_protein	-1.56518	9.76055	347.349	1.60103e-77	6.49219e-75
RS06415	hypothetical_protein	-1.40911	11.4561	235.44	3.88107e-53	9.93963e-51
RS06420	2-dehydropantoate_2-reductase	-0.0440283	9.14652	0.298953	0.584539	0.788788
RS06425	membrane_protein	-0.108313	8.92204	2.34332	0.125821	0.279884
RS06430	ferredoxin--NADP(+)_reductase	0.280475	6.97846	8.1976	0.00419457	0.0176163
RS06435	tRNA_(guanosine(37)-N1)-methyltransferase_TrmD	0.0525862	6.41605	0.213497	0.64404	0.835423
RS06440	ribosome_maturation_factor_RimM	-0.273804	4.78926	2.95984	0.0853563	0.210514
RS06455	transcriptional_regulator	-0.204099	8.95061	7.79703	0.00523323	0.0211502
RS06460	RNA-binding_protein	0.717211	10.555	45.4089	1.59909e-11	2.61992e-10
RS06465	30S_ribosomal_protein_S16	0.642556	10.3362	86.146	1.67131e-20	5.97985e-19
RS06470	permease	0.593924	10.0609	68.9154	1.02777e-16	2.70332e-15
RS06475	macrolide_ABC_transporter_ATP-binding_protein	0.515361	9.02234	54.8478	1.30234e-13	2.54506e-12
RS06480	ABC_transporter_substrate-binding_protein	0.516809	10.4556	53.3166	2.839e-13	5.39632e-12
RS06485	carbamoyl_phosphate_synthase_large_subunit	0.292389	8.25559	14.8755	0.000114845	0.000711893
RS06490	carbamoyl_phosphate_synthase_small_subunit	0.18409	7.58278	3.78	0.0518686	0.14308
RS06495	bifunctional_pyrimidine_operon_transcriptional_regulator/uracil_phosphoribosyltransferase	0.106354	6.58602	1.17926	0.277507	0.490929
RS06500	RNA_pseudouridine_synthase	-0.0246042	8.20182	0.0951247	0.757761	0.913141
RS06505	signal_peptidase_II	-0.182347	6.75067	3.60346	0.0576594	0.156307
RS06510	LysR_family_transcriptional_regulator	-0.277984	7.88103	10.707	0.00106731	0.00519872
RS06515	50S_ribosomal_protein_L27	0.65376	10.691	92.8702	5.5838e-22	2.36268e-20
RS06520	hypothetical_protein	0.593221	9.62021	66.8758	2.89165e-16	7.29055e-15
RS06525	50S_ribosomal_protein_L21	0.631476	10.1008	68.6548	1.17301e-16	3.06874e-15
RS06530	metallophosphatase	-0.409901	9.05129	24.9401	5.91396e-07	5.39912e-06
RS06535	tRNA_4-thiouridine(8)_synthase_ThiI	0.344643	8.92926	20.6284	5.57619e-06	4.36936e-05
RS06540	aminotransferase_V	0.217877	8.69234	8.19702	0.00419591	0.0176163
RS06545	hypothetical_protein	-0.724184	9.95513	70.5631	4.45778e-17	1.22551e-15
RS06550	glutathione-disulfide_reductase	-0.142394	9.87008	2.82094	0.0930418	0.224574
RS06555	glycosyl_transferase_family_8	-0.173441	7.64902	2.61007	0.106187	0.245582
RS06560	hypothetical_protein	-0.0521316	6.60187	0.231201	0.630635	0.82758
RS06565	accessory_Sec_system_glycosyltransferase_GtfB	-0.0777918	7.22147	0.521957	0.470008	0.690537
RS06570	accessory_Sec_system_glycosyltransferase_GtfA	-0.139226	7.11148	1.04987	0.305536	0.521846
RS06575	accessory_Sec_system_translocase_SecA2	-0.2389	8.11464	7.89413	0.00495955	0.0202072
RS06580	accessory_Sec_system_protein_Asp3	-0.286343	6.10163	5.6973	0.0169911	0.0570197
RS06585	accessory_Sec_system_protein_Asp2	-0.463401	7.29344	25.8212	3.74559e-07	3.51854e-06
RS06590	accessory_Sec_system_protein_Asp1	-0.711699	7.60748	56.4668	5.71558e-14	1.14926e-12
RS06595	accessory_Sec_system_protein_translocase_subunit_SecY2	-0.842112	6.77866	62.9315	2.14017e-15	4.8664e-14
RS06600	cell_wall_anchor	-0.748837	10.1835	77.3467	1.43437e-18	4.44562e-17
RS06605	hypothetical_protein	-0.233505	10.4205	10.2192	0.00138987	0.00656896
RS06610	chorismate_synthase	0.0842678	7.25228	0.742096	0.38899	0.609802
RS06615	3-dehydroquinate_synthase	0.0677128	7.21524	0.4071	0.523445	0.737223
RS06620	3-dehydroquinase	0.452492	8.94286	21.7591	3.09119e-06	2.52378e-05
RS06625	SAM-dependent_methyltransferase	0.315899	9.10827	13.6971	0.000214791	0.00126534
RS06630	alkaline_phosphatase	-0.24563	11.2005	12.9356	0.000322385	0.00178062
RS06635	50S_ribosomal_protein_L20	0.939315	11.4475	117.572	2.15155e-27	1.30868e-25
RS06640	50S_ribosomal_protein_L35	0.751841	9.09972	112.055	3.47612e-26	1.90054e-24
RS06645	translation_initiation_factor_IF-3	0.664521	9.74989	68.0272	1.61254e-16	4.1298e-15
RS06650	cytidylate_kinase	0.501276	9.14287	44.501	2.54232e-11	4.00354e-10
RS06655	membrane_protein	0.124861	8.50769	2.68188	0.101496	0.238704
RS06660	ferredoxin	-2.53661e-05	4.98718	1.29194e-08	0.999909	1
RS06665	hypothetical_protein	-0.0264404	8.15483	0.0869505	0.76809	0.922163
RS06670	peptidase_T	0.0618405	9.54868	0.583903	0.444786	0.664884
RS06675	polysaccharide_biosynthesis_protein	-0.294762	9.10689	17.1113	3.52521e-05	0.000239911
RS06680	UDP-N-acetylmuramoylalanyl-D-glutamate--22C_6-diaminopimelate_ligase	0.0717957	9.4706	0.878046	0.348737	0.56593
RS06685	iron_ABC_transporter_ATP-binding_protein	0.407644	6.10465	10.3218	0.00131471	0.00625965
RS06690	ferrichrome_ABC_transporter_substrate-binding_protein	0.470244	7.01971	11.43	0.000722691	0.00365173
RS06695	ferrichrome_ABC_transporter_permease	0.41319	5.95047	13.0864	0.000297452	0.00167523
RS06700	ferrichrome_ABC_transporter_permease	0.241996	5.65422	3.73392	0.0533182	0.146746
RS06705	hypothetical_protein	0.150346	7.14803	2.63381	0.10461	0.242628
RS06710	manganese-dependent_inorganic_pyrophosphatase	0.0846216	10.6114	1.63558	0.200933	0.389227
RS06715	pyruvate_formate_lyase-activating_protein	0.31187	8.03424	12.1617	0.000487803	0.00256057
RS06720	hypothetical_protein	0.309907	9.60358	19.1894	1.18367e-05	8.74015e-05
RS06725	transposase	-0.0166699	4.3113	0.0103888	0.918816	1
RS06730	SAM-dependent_methyltransferase	0.29019	7.06288	7.33041	0.00677976	0.0263712
RS06735	TIGR01212_family_radical_SAM_protein	0.145561	7.28523	2.12205	0.145192	0.310006
RS06740	phosphatase_PAP2_family_protein	0.155096	8.57718	2.07424	0.149805	0.317625
RS06745	membrane_protein	0.0434467	8.14635	0.211821	0.645344	0.835755
RS06750	sortase	-0.358681	6.73377	11.8639	0.000572321	0.002947
RS06755	hypothetical_protein	-0.407121	6.70237	14.1777	0.000166331	0.000997985
RS06760	class_C_sortase	-0.453938	7.23313	16.8235	4.1023e-05	0.000276096
RS06765	hypothetical_protein	-0.455158	8.38113	17.836	2.40787e-05	0.000169647
RS06770	hypothetical_protein	-0.498259	9.7294	17.5095	2.85877e-05	0.00019958
RS06775	signal_peptidase_I	-0.54932	6.16082	24.079	9.24611e-07	8.19518e-06
RS06780	hypothetical_protein	-0.95473	5.41673	41.0189	1.50766e-10	2.18994e-09
RS06785	glycosyl_transferase	0.331494	9.5579	20.4177	6.22528e-06	4.81594e-05
RS06790	glycosyl_transferase_family_2	0.423813	8.7061	31.4168	2.08177e-08	2.3281e-07
RS06795	polysaccharide_biosynthesis_protein	0.348538	9.62176	27.3974	1.65655e-07	1.64171e-06
RS06800	membrane_protein	0.300083	9.30261	17.9938	2.21625e-05	0.000157702
RS06805	glycosyl_transferase_family_2	0.212452	9.02331	9.26217	0.00233936	0.0104863
RS06810	glycosyl_transferase_family_2	0.0617734	9.41375	0.858783	0.354079	0.570513
RS06815	nucleotide_sugar_dehydratase	-0.0128407	9.50482	0.0370772	0.847308	0.972534
RS06820	2-C-methyl-D-erythritol_4-phosphate_cytidylyltransferase	-0.034489	8.98207	0.242431	0.622456	0.820609
RS06825	LicD_family_protein	0.0628975	8.45024	0.613471	0.433484	0.656908
RS06830	hypothetical_protein	0.263309	9.45053	13.0234	0.000307619	0.00171267
RS06835	hypothetical_protein	0.158469	7.41137	3.28267	0.0700151	0.179596
RS06840	glycosyl_transferase_family_2	0.145367	7.97407	2.90139	0.0885033	0.217284
RS06845	alpha-L-Rha_alpha-12C3-L-rhamnosyltransferase	0.125276	8.43356	2.59866	0.106954	0.246906
RS06850	rhamnosyltransferase	-0.0773169	8.48902	0.948851	0.330012	0.550888
RS06855	NAD(P)-dependent_oxidoreductase	-0.0589456	9.5917	0.587262	0.44348	0.663379
RS06860	aromatic_ring_hydroxylase	-0.203887	8.63817	6.01863	0.0141556	0.0490257
RS06865	RNA_polymerase_sigma_factor_RpoD	0.0735404	8.9548	0.987777	0.320286	0.539876
RS06870	DNA_primase	0.0584746	9.42799	0.52968	0.466741	0.688019
RS06875	large-conductance_mechanosensitive_channel	-0.178643	11.2537	4.47622	0.0343697	0.1033
RS06880	IS3_family_transposase	-0.00870608	5.4628	0.00454875	0.946228	1
RS06890	30S_ribosomal_protein_S21	0.702625	11.0017	35.2247	2.93775e-09	3.67483e-08
RS06895	Fe-S_oxidoreductase	0.303368	4.72434	2.76566	0.0963068	0.231307
RS06900	amino_acid_ABC_transporter_substrate-binding_protein	0.0587334	5.01767	0.180342	0.671079	0.858728
RS06905	ammonium_transporter	0.20844	4.39936	1.66033	0.197558	0.385298
RS06910	pyridine_nucleotide-disulfide_oxidoreductase	0.145503	5.14433	1.06833	0.301322	0.517007
RS06915	sulfurtransferase	0.315122	11.1377	5.48948	0.0191312	0.0628578
RS06920	hypothetical_protein	-0.957135	8.9158	61.972	3.48384e-15	7.54487e-14
RS06925	glycerol-3-phosphate_transporter	-0.698076	6.87778	42.607	6.69186e-11	1.01126e-09
RS06930	maltodextrin_phosphorylase	0.17895	7.43975	3.35471	0.0670128	0.174005
RS06935	4-alpha-glucanotransferase	0.200623	6.12062	2.94624	0.0860774	0.212077
RS06940	LacI_family_transcriptional_regulator	0.766862	8.60959	98.2955	3.60386e-23	1.70256e-21
RS06945	hypothetical_protein	0.883373	8.69017	93.3772	4.32206e-22	1.86117e-20
RS06950	maltose_ABC_transporter_permease	0.535581	6.46953	17.1547	3.4456e-05	0.000234822
RS06955	maltose_ABC_transporter_permease	0.523268	6.71802	19.1797	1.18971e-05	8.77138e-05
RS06960	MFS_transporter	0.159642	9.21761	4.32252	0.0376113	0.111189
RS06970	IS3_family_transposase	0.0250825	6.48201	0.0596331	0.807077	0.950674
RS06975	72C8-dihydro-8-oxoguanine_triphosphatase	-0.429575	5.02716	10.7104	0.00106532	0.00519426
RS06980	peptidase	-0.254625	2.95143	1.13742	0.286197	0.498081
RS06985	peptidase	0.290102	4.31957	3.50957	0.0610155	0.161711
RS06990	excinuclease_ABC_subunit_B	-0.145774	9.80469	4.12748	0.0421923	0.121628
RS06995	CPBP_family_intramembrane_metalloprotease_domain-containing_protein	0.503195	8.39397	21.3627	3.80103e-06	3.07239e-05
RS07000	glutamine_ABC_transporter_permease	-0.0397059	12.7074	0.2883	0.591312	0.794182
RS07005	peptide_ABC_transporter_ATP-binding_protein	-0.0312353	12.3321	0.238985	0.62494	0.822294
RS07010	hypothetical_protein	0.0184237	5.83364	0.0230729	0.879268	0.98971
RS07015	hypothetical_protein	0.744939	7.76511	51.2749	8.02962e-13	1.48001e-11
RS07020	GTPase_ObgE	0.740924	8.77424	65.9931	4.52515e-16	1.11209e-14
RS07025	DUF4044_domain-containing_protein	-0.49598	8.13562	24.3503	8.03128e-07	7.18386e-06
RS07030	aminopeptidase	-0.614464	7.32581	26.8226	2.23019e-07	2.16609e-06
RS07035	cell_wall_surface_anchor_protein	0.0991748	9.76903	1.24564	0.264386	0.476659
RS07040	amidase	0.447143	9.04277	10.9865	0.000917772	0.00453849
RS07045	hypothetical_protein	0.571408	4.12918	10.4481	0.00122774	0.00588008
RS07050	16S_rRNA_pseudouridine(516)_synthase	-0.326671	5.2885	5.18836	0.0227387	0.0728415
RS07055	aldo/keto_reductase	-0.814655	11.0786	57.8714	2.79821e-14	5.81885e-13
RS07060	NAD(P)H-dependent_oxidoreductase	-0.735883	8.4961	97.512	5.35313e-23	2.45739e-21
RS07065	lactoylglutathione_lyase	-0.590617	10.2394	36.1014	1.87309e-09	2.37975e-08
RS07070	glycosyltransferase	-0.68408	7.59347	57.2692	3.8006e-14	7.83631e-13
RS07075	amino_acid_transporter	0.226857	10.2251	10.0765	0.00150169	0.00702619
RS07080	SsrA-binding_protein	0.0876407	7.94663	0.970699	0.324506	0.544271
RS07085	ribonuclease_R	0.106781	9.05629	1.95316	0.162246	0.335954
RS07090	preprotein_translocase_subunit_SecG	0.610266	10.2874	57.2164	3.90405e-14	8.01566e-13
RS07095	MFS_transporter	0.0732669	9.20828	0.867368	0.351685	0.568206
RS07100	hypothetical_protein	0.474527	6.66946	16.8289	4.09062e-05	0.000275692
RS07105	ABC_transporter_ATP-binding_protein	0.443765	5.14845	9.21478	0.00240069	0.0107074
RS07110	dephospho-CoA_kinase	-0.00329039	6.55616	0.000972482	0.975122	1
RS07115	formamidopyrimidine-DNA_glycosylase	-0.265657	5.64218	3.70337	0.0543026	0.14899
RS07120	transcriptional_regulator	-0.242289	5.21123	2.84789	0.0914937	0.22216
RS07125	transglutaminase	0.0492194	5.78848	0.190148	0.662793	0.850515
RS07130	hypothetical_protein	-0.213137	3.11734	0.595093	0.440456	0.659668
RS07135	hypothetical_protein	-0.221988	3.30012	1.09135	0.296172	0.511464
RS07140	hypothetical_protein	0.299299	4.20534	3.29541	0.0694737	0.17849
RS07145	hypothetical_protein	0.0933268	7.87524	1.25601	0.262407	0.474145
RS07150	GTPase_Era	0.352857	8.89571	22.3664	2.25276e-06	1.87384e-05
RS07155	UDP_kinase	0.0848236	7.1972	0.785741	0.375391	0.593262
RS07160	endoribonuclease_YbeY	0.00944894	8.34081	0.0146276	0.903735	1
RS07165	polyketide_synthesis_methyltransferase	-0.549563	6.24472	19.1896	1.18359e-05	8.74015e-05
RS07170	DNA_mismatch_repair_protein_MutT	-0.0559285	5.12712	0.150921	0.697657	0.870066
RS07175	nucleotidyltransferase	-0.0359092	6.27422	0.083925	0.772047	0.924917
RS07180	PhoH_family_protein	-0.167379	8.76921	3.47146	0.0624362	0.164313
RS07185	oleate_hydratase	-1.20424	10.2274	193.63	5.12862e-44	9.59842e-42
RS07190	hypothetical_protein	-0.391989	8.28977	21.5048	3.5294e-06	2.87191e-05
RS07195	peptide-methionine_(S)-S-oxide_reductase	-0.61309	7.93629	55.2702	1.05049e-13	2.06117e-12
RS07200	S1_RNA-binding_protein	0.209255	8.38209	8.04294	0.00456814	0.0188991
RS07205	ribosome-recycling_factor	0.568114	9.90925	66.1165	4.25053e-16	1.05526e-14
RS07210	UMP_kinase	0.346859	9.23554	22.3693	2.2494e-06	1.87384e-05
RS07215	ABC_transporter_ATP-binding_protein	-0.0358987	2.63714	0.0186336	0.891422	0.997392
RS07220	peptide_ABC_transporter_ATP-binding_protein	0.115149	3.3605	0.289738	0.590389	0.79338
RS07225	peptide_ABC_transporter_permease	0.797892	2.66579	8.4013	0.00374953	0.0159906
RS07230	peptide_ABC_transporter_permease	-0.00678443	3.08015	0.000898274	0.97609	1
RS07235	nickel_ABC_transporter2C_nickel/metallophore_periplasmic_binding_protein	0.309939	3.98834	3.35353	0.0670612	0.174006
RS07240	50S_ribosomal_protein_L1	0.580015	12.2356	93.2988	4.49657e-22	1.91932e-20
RS07245	50S_ribosomal_protein_L11	0.37315	10.7729	31.9389	1.59101e-08	1.82161e-07
RS07250	transposase	0.204765	3.95714	1.52565	0.216767	0.411866
RS07255	MFS_transporter	0.304245	7.50079	7.58144	0.00589722	0.0234252
RS07260	amidohydrolase	0.18489	6.72563	1.84256	0.174652	0.356333
RS07265	LysR_family_transcriptional_regulator	0.301335	7.59637	6.74683	0.00939146	0.0349647
RS07275	IS3_family_transposase	0.0191214	6.69088	0.0300316	0.862418	0.97981
RS07280	aminodeoxychorismate_synthase2C_component_I	-0.306439	7.38039	11.5063	0.000693598	0.00353038
RS07285	cell_division_protein_FtsK	0.394246	9.04211	28.9395	7.46728e-08	7.73102e-07
RS07290	peptidyl-prolyl_cis-trans_isomerase	-0.524505	8.63364	46.0419	1.15752e-11	1.92893e-10
RS07295	manganese_ABC_transporter_permease	0.687114	9.04991	92.209	7.79904e-22	3.21611e-20
RS07300	manganese_ABC_transporter_ATP-binding_protein	0.770517	8.3188	78.1122	9.73486e-19	3.03653e-17
RS07305	metal_ABC_transporter_substrate-binding_protein	0.884563	9.53381	129.973	4.15339e-30	3.25974e-28
RS07310	MarR_family_transcriptional_regulator	-0.062032	9.20792	0.638602	0.424217	0.646287
RS07465	rRNA_(cytidine-2-O-)-methyltransferase	0.0818551	8.74897	1.24415	0.264672	0.476998
RS07470	initiation-control_protein_YabA	0.0337924	7.00154	0.12527	0.723388	0.889564
RS07535	tRNA_(uridine(34)/cytosine(34)/5-carboxymethylaminomethyluridine(34)-2-O)-methyltransferase_TrmL	0.575452	6.73893	21.2113	4.11327e-06	3.2974e-05
RS07540	amino_acid_permease	0.277248	8.27853	10.0212	0.00154752	0.0072198
RS07545	Trk_system_potassium_transport_protein_TrkA	-0.441229	9.57387	34.9284	3.42054e-09	4.24701e-08
RS07550	Trk_system_potassium_transporter_TrkH	-0.045147	9.72415	0.382525	0.536255	0.748972
RS07555	membrane_protein_insertion_efficiency_factor_YidD	1.0007	7.14546	63.1547	1.91089e-15	4.38604e-14
RS07560	ribosomal_large_subunit_pseudouridine_synthase_B	0.94913	8.1047	92.6032	6.39044e-22	2.68068e-20
RS07565	segregation/condensation_protein_B	0.906574	7.05183	70.0559	5.7648e-17	1.56712e-15
RS07570	segregation/condensation_protein_A	0.864038	7.66247	76.5872	2.10697e-18	6.32872e-17
RS07575	XerD-like_tyrosine_recombinase	0.7168	7.81518	55.8263	7.9167e-14	1.5788e-12
RS07580	CBS_domain-containing_protein	0.564133	7.69106	35.878	2.10064e-09	2.66191e-08
RS07585	phosphodiesterase	0.692366	7.38057	50.6375	1.11101e-12	2.0324e-11
RS07590	non-canonical_purine_NTP_pyrophosphatase	0.571571	8.21779	50.4736	1.20777e-12	2.18475e-11
RS07595	glutamate_racemase	0.536206	7.9979	36.2141	1.76789e-09	2.25198e-08
RS07600	hypothetical_protein	0.270905	8.52245	10.6068	0.00112673	0.00545541
RS07605	hypothetical_protein	-0.41084	3.90889	5.52036	0.0187964	0.0618832
RS07610	DNA-binding_protein	-0.525284	7.10796	34.2779	4.77769e-09	5.82663e-08
RS07615	membrane_protein	-0.303777	10.0527	18.6682	1.55558e-05	0.000113485
RS07620	hypothetical_protein	-0.299212	8.94994	13.1857	0.000282099	0.00160174
RS07625	23S_rRNA_methyltransferase	0.0120592	8.16794	0.0138199	0.906418	1
RS07630	acylphosphatase	-1.2123	6.09872	110.177	8.96203e-26	4.74013e-24
RS07635	membrane_protein_insertase_YidC	-0.149293	10.4225	3.83592	0.0501654	0.138933
RS07640	amino_acid_ABC_transporter_permease	0.737543	9.18156	46.9031	7.45831e-12	1.26014e-10
RS07645	ABC_transporter_substrate-binding_protein	0.595939	9.29203	22.8028	1.79504e-06	1.50857e-05
RS07650	amidase	-0.95823	6.92466	63.413	1.67609e-15	3.88374e-14
RS07655	transcription_elongation_factor_GreA	0.676114	9.20539	83.738	5.64894e-20	1.93576e-18
RS07660	aminodeoxychorismate_lyase	0.621313	10.6111	94.3968	2.58215e-22	1.14225e-20
RS07665	N-acetyltransferase	0.955006	7.58593	82.0943	1.29749e-19	4.32436e-18
RS07670	UDP-N-acetylmuramate--L-alanine_ligase	0.280839	10.2897	13.3068	0.000264438	0.00151561
RS07675	hypothetical_protein	0.146136	9.62932	1.60616	0.205032	0.394966
RS07680	RNA_helicase	-0.417865	10.368	26.1684	3.12902e-07	2.96222e-06
RS07685	ribosome_biogenesis_GTPase_Der	0.538783	9.68761	63.706	1.44441e-15	3.3954e-14
RS07690	primosomal_protein_DnaI	0.293518	8.46084	10.1814	0.00141862	0.00666959
RS07695	chromosome_replication_initiation_protein	0.140776	8.40277	2.91177	0.0879355	0.215999
RS07700	transcriptional_regulator_NrdR	0.0282693	7.15978	0.0806158	0.776465	0.928552
RS07705	two-component_sensor_histidine_kinase	0.0644448	10.7094	0.845272	0.357893	0.574566
RS07710	DNA-binding_response_regulator	-0.186859	11.0739	8.0794	0.00447712	0.0185726
RS07715	hypothetical_protein	-0.739872	8.80421	84.7868	3.32329e-20	1.15508e-18
RS07720	zinc_metalloprotease_HtpX	-0.403209	10.001	31.608	1.8865e-08	2.14479e-07
RS07725	membrane_protein	-0.513148	8.9588	34.9279	3.42135e-09	4.24701e-08
RS07730	ribosomal_RNA_small_subunit_methyltransferase_G	-0.141885	7.64383	2.82367	0.0928837	0.224335
RS07735	V-type_Na+_-ATPase_subunit_J	0.0547241	8.99955	0.482377	0.487347	0.706414
RS07740	potassium_transporter_Trk	0.166059	8.90798	4.33104	0.0374235	0.110835
RS07745	cobalt_ABC_transporter_permease	0.385591	8.30379	24.1153	9.07354e-07	8.05691e-06
RS07750	heme_ABC_transporter_ATP-binding_protein	0.328942	8.67802	18.6249	1.5913e-05	0.000115744
RS07755	DUF3816_family_protein	0.313306	7.31587	12.6749	0.000370587	0.00199699
RS07760	serine/threonine_transporter_SstT	0.416771	9.77695	33.7377	6.30666e-09	7.55868e-08
RS07765	branched-chain_amino_acid_transporter	0.737468	7.54057	67.6882	1.91506e-16	4.8789e-15
RS07770	alcohol_dehydrogenase	0.703556	7.36543	47.2585	6.22165e-12	1.06226e-10
RS07775	ABC_transporter_permease	0.616251	7.09569	39.0145	4.20673e-10	5.78247e-09
RS07780	methionine_import_ATP-binding_protein_MetN	0.58871	6.512	28.9697	7.35181e-08	7.644e-07
RS07785	peptidase_M20	0.575706	6.10547	24.7153	6.64551e-07	6.0106e-06
RS07790	O-sialoglycoprotein_endopeptidase	0.300463	6.94856	7.97017	0.00475546	0.019511
RS07795	ABC_transporter_substrate-binding_protein	-0.519744	7.49053	12.2579	0.000463295	0.00243718
RS07800	glutamine_amidotransferase	-0.658796	5.8299	19.098	1.24175e-05	9.1412e-05
RS07805	transcriptional_regulator	0.177866	10.1606	6.04506	0.0139453	0.0483316
RS07810	hypothetical_protein	0.684816	5.66787	21.1764	4.18883e-06	3.35244e-05
RS07815	2-dehydropantoate_2-reductase	-0.195245	7.33054	3.97306	0.0462336	0.130419
RS07820	hypothetical_protein	0.321185	0.742659	0.2993	0.584322	0.788788
RS07825	hypothetical_protein	1.40451	0.386481	3.25408	0.0712458	0.181795
RS07830	hypothetical_protein	1.6223	-0.803477	0.888069	0.346001	0.562392
RS07835	DhaKLM_operon_coactivator_DhaQ	0.430228	5.28488	9.92915	0.00162681	0.00755351
RS07840	dihydroxyacetone_kinase_transcriptional_activator_DhaS	-0.0476759	3.80374	0.0325713	0.856779	0.975454
RS07845	dihydroxyacetone_kinase_subunit_DhaK	0.655618	8.2377	15.6986	7.42796e-05	0.000483861
RS07850	dihydroxyacetone_kinase_subunit_L	1.03172	5.75814	45.0315	1.93889e-11	3.10996e-10
RS07855	PTS-dependent_dihydroxyacetone_kinase_phosphotransferase_subunit_DhaM	0.674943	4.36384	12.7578	0.000354536	0.00193188
RS07860	glycerol_transporter	0.519719	5.55108	11.0077	0.00090734	0.00449605
RS07865	cupin	-0.982834	10.9199	78.1372	9.61285e-19	3.01781e-17
RS07870	MerR_family_transcriptional_regulator	0.257553	5.99389	5.04813	0.0246525	0.0776462
RS07875	hypothetical_protein	0.357627	7.58736	17.5118	2.85535e-05	0.00019958
RS07880	hypothetical_protein	0.456889	5.39949	11.1993	0.000818303	0.00409236
RS07885	SAM-dependent_methyltransferase	0.246383	6.66812	5.42995	0.0197942	0.0647737
RS07890	ribosome_silencing_factor_RsfS	0.305342	7.82806	7.46953	0.00627521	0.0247649
RS07895	cysteine_hydrolase	0.300535	8.25299	13.3884	0.000253186	0.00146319
RS07900	HD_domain-containing_protein	0.210522	8.17476	6.36227	0.0116572	0.0416171
RS07905	nicotinate-nicotinamide_nucleotide_adenylyltransferase	0.354373	8.38946	16.7997	4.15396e-05	0.000278888
RS07910	RNA-binding_protein	0.230292	7.82961	4.20846	0.0402229	0.117341
RS07915	ribosome_biogenesis_GTPase_YqeH	0.187775	8.89979	6.00184	0.014291	0.0494593
RS07920	HAD_family_hydrolase	0.076275	8.29632	0.900244	0.342716	0.562392
RS07925	EamA_family_transporter	1.41821	6.08938	139.911	2.78418e-32	2.37681e-30
RS07930	aspartyl/glutamyl-tRNA(Asn/Gln)_amidotransferase_subunit_B	0.339111	10.3341	24.0713	9.28339e-07	8.21327e-06
RS07935	glutamyl-tRNA(Gln)_amidotransferase_subunit_A	0.193516	9.48526	7.11394	0.00764869	0.0293753
RS07940	aspartyl/glutamyl-tRNA(Asn/Gln)_amidotransferase_subunit_C	0.193087	7.50144	4.54457	0.0330234	0.100057
RS07945	pyruvate2C_phosphate_dikinase	-0.0107553	6.97695	0.0126837	0.91033	1
RS07950	phosphoenolpyruvate_synthase_regulatory_protein	-0.15324	6.14462	1.70134	0.192113	0.378164
RS07955	CBS_domain-containing_protein	-0.344324	6.18692	8.30147	0.0039613	0.016776
RS07960	3-hydroxybutyryl-CoA_dehydrogenase	0.219024	9.49823	4.10477	0.0427624	0.122927
RS07965	isochorismatase	-0.258292	6.40944	5.05641	0.024535	0.0774738
RS07970	GTP-sensing_pleiotropic_transcriptional_regulator_CodY	0.526589	9.93891	53.011	3.31678e-13	6.27994e-12
RS07975	aminotransferase	0.214518	9.64858	6.66458	0.00983478	0.0362546
RS07980	universal_stress_protein_UspA	-0.0913631	9.79477	1.47896	0.223937	0.422029
RS07985	haloacid_dehalogenase	0.0917588	7.82169	1.1663	0.280162	0.491091
RS07990	L-asparaginase	0.262537	7.52552	8.84672	0.00293616	0.0128253
RS07995	shikimate_dehydrogenase	-0.816296	5.71782	44.3138	2.79742e-11	4.37693e-10
RS08000	aldo/keto_reductase	-0.911439	7.8115	79.3447	5.21648e-19	1.68102e-17
RS08005	DNA_helicase_RecG	-0.229198	9.48064	10.2255	0.00138511	0.00656061
RS08010	CHAP_domain-containing_protein	0.179796	11.7303	7.09954	0.00771036	0.0294958
RS08015	alanine_racemase	0.0727686	8.3701	0.920822	0.337259	0.560486
RS08020	holo-ACP_synthase	0.135175	6.69006	1.5602	0.211636	0.404167
RS08025	phospho-2-dehydro-3-deoxyheptonate_aldolase	0.13139	8.47128	1.75282	0.185522	0.36847
RS08030	preprotein_translocase_subunit_SecA	0.392795	11.6536	32.591	1.1374e-08	1.33364e-07
RS08035	mannose-6-phosphate_isomerase2C_class_I	-0.246422	8.69459	7.90976	0.00491689	0.0200718
RS08040	fructokinase	0.264034	3.00209	0.891737	0.345007	0.562392
RS08045	PTS_beta-glucoside_transporter_subunit_EIIBCA	0.460483	5.28116	11.5288	0.00068526	0.00349526
RS08050	sucrose-6-phosphate_hydrolase	0.238363	6.67493	3.46083	0.0628387	0.165015
RS08055	LacI_family_transcriptional_regulator	0.226899	6.41236	4.74922	0.0293116	0.0905013
RS08060	N_utilization_substance_protein_B	0.14666	9.7968	3.21959	0.0727618	0.184887
RS08065	Asp23/Gls24_family_envelope_stress_response_protein	0.118443	9.08668	1.96197	0.161303	0.334569
RS08070	elongation_factor_P	0.225727	9.48687	7.95515	0.00479508	0.0196405
RS08075	hypothetical_protein	-0.304151	5.53924	5.24013	0.0220716	0.0710607
RS08080	hypothetical_protein	-0.289578	5.51912	4.24006	0.0394808	0.115453
RS08085	hypothetical_protein	-0.27994	6.01028	6.65152	0.0099071	0.0364384
RS08090	hypothetical_protein	-0.453792	6.43451	20.2566	6.77203e-06	5.19758e-05
RS08095	peptidase_M24_family_protein	-0.534147	7.7147	43.57	4.09063e-11	6.27919e-10
RS08100	DUF4811_domain-containing_protein	1.01446	7.68384	85.0762	2.87085e-20	1.00501e-18
RS08105	MFS_transporter	0.736548	7.61329	42.2056	8.21654e-11	1.234e-09
RS08110	excinuclease_ABC_subunit_A	-0.443781	10.0364	31.0152	2.56021e-08	2.82494e-07
RS08115	membrane_protein	-0.0642505	9.71417	0.873137	0.350088	0.567253
RS08120	magnesium_transporter	-0.313033	9.48929	17.9919	2.21849e-05	0.000157702
RS08125	30S_ribosomal_protein_S18	0.560102	11.3437	44.1666	3.01585e-11	4.67098e-10
RS08130	Single-stranded_DNA-binding_protein_1	0.520014	11.2776	68.0496	1.59435e-16	4.10483e-15
RS08135	30S_ribosomal_protein_S6	0.528416	10.497	53.6135	2.44078e-13	4.65758e-12
RS08140	A/G-specific_adenine_glycosylase	0.356915	7.83887	15.4707	8.37947e-05	0.00054006
RS08145	transcriptional_regulator	0.0409305	5.76667	0.0726534	0.787512	0.936698
RS08150	thiol_reductase_thioredoxin	-0.587089	11.6584	38.5172	5.42729e-10	7.35631e-09
RS08155	acid_phosphatase	0.273034	7.21427	9.15509	0.00248027	0.011032
RS08160	endonuclease_MutS2	0.195658	8.88739	6.50934	0.0107309	0.038965
RS08165	colicin_V_production_protein	0.304075	8.71667	15.2305	9.51534e-05	0.000602886
RS08170	hypothetical_protein	0.00599515	6.86563	0.00220349	0.96256	1
RS08175	ribonuclease_HIII	-0.415311	8.45713	26.6701	2.41322e-07	2.32891e-06
RS08180	signal_peptidase_I	0.0828643	8.44517	1.12441	0.288972	0.501833
RS08185	helicase	-0.322476	8.53611	12.8235	0.000342288	0.001882
RS08190	hypothetical_protein	0.195162	10.1395	6.06675	0.013775	0.0479561
RS08195	DNA_polymerase_IV	-0.00989438	7.05564	0.00973568	0.921401	1
RS08200	formate_acetyltransferase	0.421942	11.7668	12.3562	0.000439522	0.00232217
RS08205	FMN-binding_protein	0.422101	6.9145	7.6888	0.00555647	0.0222533
RS08210	serine_hydrolase	-0.045218	9.11157	0.374168	0.540741	0.753939
RS08215	peptidase	-0.165688	8.22755	4.08156	0.0433537	0.123948
RS08220	anion_permease	0.722323	7.01758	30.1688	3.96019e-08	4.30546e-07
RS08225	aquaporin	0.374552	10.3334	19.782	8.67948e-06	6.52772e-05
RS08230	universal_stress_protein_UspA	3.49652	9.38486	39.7148	2.93884e-10	4.14505e-09
RS08235	MFS_transporter	2.87318	9.69147	45.1408	1.83368e-11	2.96435e-10
RS08240	Crp/Fnr_family_transcriptional_regulator	-0.702481	7.45263	20.0276	7.63311e-06	5.81263e-05
RS08245	Xaa-Pro_dipeptidyl-peptidase	-0.356904	9.11358	11.4494	0.000715183	0.00362131
RS08250	hypothetical_protein	-0.0802183	6.63616	0.396996	0.528645	0.741535
RS08255	geranylgeranyl_pyrophosphate_synthase	0.123315	9.62247	2.46762	0.116214	0.262533
RS08260	amino_acid_ABC_transporter_ATP-binding_protein	-0.0617698	9.18749	0.706654	0.400557	0.622321
RS08265	thiol_reductant_ABC_exporter_subunit_CydD	-0.0168125	9.56155	0.0351548	0.851272	0.973954
RS08270	cytochrome_c_oxidase_assembly_protein	0.163109	10.5862	2.89742	0.0887214	0.217603
RS08275	cytochrome_ubiquinol_oxidase_subunit_I	0.257563	10.865	7.04422	0.00795216	0.030174
RS08280	NADH_dehydrogenase	0.421109	10.5107	14.1529	0.000168541	0.00101
RS08285	12C4-dihydroxy-2-naphthoate_octaprenyltransferase	0.49555	10.5825	24.0086	9.59077e-07	8.43918e-06
RS08290	hypothetical_protein	-0.538047	5.37584	16.9789	3.77967e-05	0.000255443
RS08295	nucleoid-associated_protein2C_YbaB/EbfC_family	0.0452886	9.74417	0.242983	0.62206	0.820309
RS08300	cyclopropane-fatty-acyl-phospholipid_synthase	-0.451309	9.72106	28.7906	8.06402e-08	8.29588e-07
RS08305	MerR_family_transcriptional_regulator	0.627847	6.68392	33.5805	6.83754e-09	8.15477e-08
RS08310	3-5_exonuclease	0.325613	4.79224	5.30392	0.0212775	0.0687493
RS08315	hypothetical_protein	0.635703	7.26744	38.1786	6.45566e-10	8.63002e-09
RS08320	aminoacetone_oxidase_family_FAD-binding_enzyme	0.52317	8.86824	34.234	4.88668e-09	5.94465e-08
RS08325	DUF4931_domain-containing_protein	0.115941	5.37864	0.884501	0.346972	0.563352
RS08330	30S_ribosomal_protein_S14	0.268381	7.37499	5.63587	0.0175966	0.0586876
RS08335	amino_acid_lyase	-0.687206	7.06586	42.9353	5.65816e-11	8.57713e-10
RS08340	tRNA_(adenosine(37)-N6)-threonylcarbamoyltransferase_complex_transferase_subunit_TsaD	0.47423	8.78389	40.9264	1.58069e-10	2.28918e-09
RS08345	ribosomal-protein-alanine_N-acetyltransferase_RimI	0.205123	7.07792	4.85638	0.027544	0.0856417
RS08350	tRNA_(adenosine(37)-N6)-threonylcarbamoyltransferase_complex_dimerization_subunit_type_1_TsaB	0.0856947	7.64485	1.0328	0.309503	0.526253
RS08355	hypothetical_protein	-0.10688	7.73373	1.59732	0.206283	0.396967
RS08360	ribonuclease_J	0.241881	11.074	14.2084	0.000163641	0.000984272
RS08365	CHAP_domain-containing_protein	-0.0539604	6.66869	0.245061	0.620574	0.818896
RS08370	type_I_glutamate--ammonia_ligase	-0.0712288	11.7575	0.884677	0.346924	0.563352
RS08375	MerR_family_transcriptional_regulator	-0.179521	10.284	5.03572	0.0248297	0.07805
RS08380	FUSC_family_protein	-0.629397	7.21936	34.8408	3.57799e-09	4.43016e-08
RS08385	phosphoglycerate_kinase	-0.248292	13.4394	14.0177	0.000181095	0.00107859
RS09005	22C3-cyclic-nucleotide_2-phosphodiesterase	1.24028	5.89164	103.677	2.3815e-24	1.21983e-22
RS09010	class_Ib_ribonucleoside-diphosphate_reductase_assembly_flavoprotein_NrdI	-0.444668	6.9358	18.0477	2.15438e-05	0.000153939
RS09015	peptidase_M42	-0.361697	8.6401	15.4836	8.32243e-05	0.000537095
RS09020	zeta_toxin	-0.210901	8.13667	6.95167	0.0083741	0.0316615
RS09030	iron_ABC_transporter_substrate-binding_protein	0.06487	5.84979	0.286147	0.5927	0.795367
RS09035	DNA-binding_response_regulator	0.288988	5.05182	3.59628	0.0579089	0.156508
RS09040	sensor_histidine_kinase	0.0333711	5.98712	0.0872956	0.767644	0.922077
RS09045	PTS_mannose_transporter_subunit_IID	0.60792	2.51585	2.12304	0.145099	0.310006
RS09050	PTS_mannose_transporter_subunit_IIC	0.375988	2.19133	1.26907	0.259941	0.470912
RS09055	PTS_sorbose_transporter_subunit_IIB	0.553715	2.63906	2.18069	0.139752	0.302436
RS09060	PTS_mannose_transporter_subunit_IIA	-0.209348	3.19304	0.686288	0.40743	0.628983
RS09065	alanine_racemase	-0.0864725	4.71933	0.233176	0.629179	0.826116
RS09070	membrane_protein	0.474764	6.09052	14.0452	0.000178469	0.00106425
RS09075	ABC_transporter_ATP-binding_protein	0.311306	4.92485	4.5402	0.0331077	0.10025
RS09080	hypothetical_protein	0.495797	3.65772	7.09744	0.00771941	0.0295072
RS09085	ABC_transporter_ATP-binding_protein	0.157562	1.07759	0.100653	0.751047	0.909103
RS09090	TCS_sensor_kinase	0.417848	5.56423	5.8234	0.0158143	0.0537377
RS09095	DNA-binding_response_regulator	0.634189	3.83576	12.708	0.000364097	0.00196855
RS09100	RgfB_protein	0.29055	4.42006	3.67994	0.0550709	0.150548
RS09105	PTS_glucose_transporter_subunit_IIABC	0.615408	5.8933	27.6452	1.45733e-07	1.45315e-06
RS09110	histidine_kinase	-0.410399	7.64723	20.132	7.22774e-06	5.52122e-05
RS09115	DNA-binding_response_regulator	-0.528929	5.62336	18.4014	1.78931e-05	0.000129372
RS09120	phosphate_transport_system_regulatory_protein_PhoU	-0.473143	3.32741	4.45151	0.0348704	0.104435
RS09125	phosphate_ABC_transporter_ATP-binding_protein	-0.382802	2.44193	1.86247	0.17234	0.352059
RS09130	phosphate_ABC_transporter2C_permease_protein_PstA	-0.720981	3.57152	10.8023	0.00101374	0.00496764
RS09135	phosphate_ABC_transporter_permease_subunit_PstC	-0.572622	2.68409	4.46435	0.0346092	0.103839
RS09140	phosphate-binding_protein	-0.9984	2.98942	17.343	3.12048e-05	0.000215379
RS09145	thymidylate_kinase	-0.0502171	8.06809	0.351763	0.553117	0.765491
RS09150	16S_rRNA_(uracil(1498)-N(3))-methyltransferase	0.00168767	6.96157	0.00029598	0.986274	1
RS09155	50S_ribosomal_protein_L11_methyltransferase	-0.240035	6.94914	6.09116	0.013586	0.0474584
RS09160	hypothetical_protein	-0.304563	6.6714	8.72208	0.0031438	0.0136465
RS09165	MerR_family_transcriptional_regulator	-0.740899	6.53153	47.5962	5.237e-12	9.00467e-11
RS09170	N-acetyltransferase	-0.330645	7.47798	12.9951	0.000312305	0.00173361
RS09175	DNA_mismatch_repair_protein_MutT	-0.203379	6.32639	3.28905	0.0697436	0.179088
RS09180	hypothetical_protein	-0.173981	6.71704	2.61399	0.105925	0.245209
RS09185	N-acetyltransferase	-0.0628546	5.94336	0.276031	0.599314	0.797966
RS09190	recombinase_RarA	0.158366	7.7165	3.52747	0.0603598	0.16047
RS09200	site-specific_integrase	-0.0166332	6.00471	0.0207414	0.885486	0.993808
RS09205	hypothetical_protein	-0.27784	1.26383	0.382913	0.536049	0.748898
RS09210	hypothetical_protein	0.344678	5.17741	3.21356	0.0730303	0.185376
RS09215	cell_wall_anchor	-1.26204	1.80078	8.96632	0.00275001	0.0120772
RS09220	hypothetical_protein	0.655378	0.77489	1.21718	0.269916	0.483789
RS09225	amidase	-0.579211	1.07788	1.43128	0.231555	0.433271
RS09235	hypothetical_protein	-0.0218477	4.22791	0.00699236	0.933358	1
RS09240	conjugal_transfer_protein	0.335065	3.91018	3.0976	0.0784078	0.19606
RS09245	conjugal_transfer_protein	0.207858	1.26861	0.206264	0.649711	0.838816
RS09250	hypothetical_protein	0.312098	0.132343	0.149688	0.698833	0.870066
RS09255	conjugal_transfer_protein	0.154784	1.39715	0.098356	0.753811	0.910011
RS09260	Txe/YoeB_family_addiction_module_toxin	-0.485979	5.77382	14.6305	0.00013078	0.000807585
RS09265	prevent-host-death_protein	-0.647762	5.91389	23.903	1.01313e-06	8.86668e-06
RS09270	hypothetical_protein	0.433372	-0.255512	0.167254	0.682564	0.859634
RS09275	hypothetical_protein	0.15126	0.0864137	0.033555	0.854657	0.973954
RS09280	hypothetical_protein	-0.903726	2.06498	7.22819	0.00717677	0.027716
RS09285	hypothetical_protein	-0.134404	8.81163	3.19503	0.0738622	0.187
RS09290	transporter	-0.215012	9.20728	7.06824	0.00784625	0.029831
RS09295	transcriptional_regulator	-0.540374	0.0292746	0.426793	0.513567	0.728591
RS09300	hypothetical_protein	-0.242286	0.256774	0.110266	0.739841	0.901647
RS09305	Cro/Cl_family_transcriptional_regulator	0.896311	1.37002	2.78817	0.0949624	0.228417
RS09310	cell_division_protein_FtsK	0.425466	1.20837	0.707604	0.40024	0.622227
RS09315	hypothetical_protein	0.112498	0.625803	0.0239813	0.876933	0.988233
RS09320	hypothetical_protein	0.128279	-0.595619	0.00839286	0.927006	1
RS09325	cell_wall_surface_anchor_protein	0.797666	1.67678	3.89685	0.0483766	0.134746
RS09330	hypothetical_protein	0.187637	2.96952	0.438455	0.507869	0.725996
RS09335	hypothetical_protein	0.467929	0.575583	0.247371	0.618933	0.817515
RS09340	hypothetical_protein	0.69715	0.0722948	0.650535	0.419921	0.641984
RS09345	hypothetical_protein	-0.551893	0.034939	0.417014	0.518431	0.732912
RS09350	transcriptional_regulator	-0.661763	0.464785	1.05534	0.304281	0.520799
RS09355	transcriptional_regulator	-0.305858	6.77366	7.1765	0.00738647	0.0285032
RS09360	transcriptional_regulator	-0.116649	6.73005	1.15795	0.281892	0.492703
RS09365	hypothetical_protein	0.0945083	8.14429	1.30244	0.253768	0.463006
RS09370	hypothetical_protein	-0.444126	6.59494	11.3719	0.000745629	0.00375983
RS09375	hypothetical_protein	-0.437188	5.49147	10.0428	0.00152941	0.00714212
RS09380	XRE_family_transcriptional_regulator	-0.299249	4.76357	3.1238	0.0771566	0.193628
RS09385	hypothetical_protein	0.0609345	8.94736	0.680034	0.409575	0.631493
RS09390	ISL3_family_transposase	-0.147131	4.74929	1.05388	0.304615	0.521108
RS09395	mercury(II)_reductase	-0.407435	5.19387	9.04978	0.00262727	0.0116221
RS09400	Hg(II)-responsive_transcriptional_regulator	-0.345763	3.78272	3.10454	0.0780745	0.195327
RS09405	manganese_transporter	0.0367833	8.58832	0.232775	0.629474	0.82628
RS09410	ABC_transporter_permease	-0.00522876	6.79475	0.0014017	0.970135	1
RS09415	ABC_transporter_ATP-binding_protein	0.145899	5.87959	1.62064	0.203002	0.391677
RS09420	YydF_family_exported_signaling_peptide	0.0502262	6.26073	0.093523	0.759745	0.9144
RS09425	hypothetical_protein	0.365648	4.02816	4.66115	0.0308525	0.0944796
RS09430	YydG_family_peptide_radical_SAM_peptide_maturase	0.25433	3.78589	1.00285	0.316621	0.53548
RS09435	hypothetical_protein	-0.495075	6.5349	15.0788	0.000103117	0.000643289
RS09440	hypothetical_protein	-0.520829	6.43793	22.1858	2.47499e-06	2.04818e-05
RS09445	hypothetical_protein	-0.526432	7.96986	36.5597	1.48064e-09	1.90603e-08
RS09450	hypothetical_protein	-0.483627	6.42454	20.7052	5.35696e-06	4.21795e-05
RS09455	hypothetical_protein	-0.453744	6.72623	20.7369	5.26903e-06	4.16602e-05
RS09460	hypothetical_protein	-0.401348	6.49219	15.0463	0.000104908	0.000652789
RS09465	hypothetical_protein	-0.522998	5.83756	13.2958	0.000266002	0.001521
RS09470	streptomycin_resistance_protein	-0.346629	6.96472	12.6824	0.000369109	0.00199343
RS09475	hypothetical_protein	-0.345364	4.61509	5.05332	0.0245788	0.077562
RS09480	hypothetical_protein	-0.209312	5.03711	2.49514	0.114198	0.258821
RS09485	PadR_family_transcriptional_regulator	-0.526052	4.05742	7.64392	0.00569641	0.0226831
RS09490	N-acetyltransferase	-0.523411	5.38379	14.1062	0.000172772	0.00103281
RS09495	ABC_transporter_permease	-0.252721	5.14874	3.62238	0.0570072	0.154798
RS09500	ABC_transporter_ATP-binding_protein	-0.135556	5.30445	0.614013	0.433281	0.656805
RS09505	hypothetical_protein	-0.349799	3.23234	2.78174	0.0953445	0.229223
RS09510	transcriptional_regulator	-0.469652	5.90941	13.3329	0.000260796	0.00150004
RS09525	PAP2_family_phosphoesterase	-2.30991	5.24958	265.602	1.03131e-59	2.95196e-57
RS09530	hypothetical_protein	-0.602867	4.28735	13.9581	0.00018693	0.00110792
RS09535	Rossman_fold_protein2C_TIGR00730_family	-0.552441	5.95277	11.1244	0.000851972	0.00424764
RS09540	CPBP_family_intramembrane_metalloprotease	-0.797507	7.19407	39.2457	3.73692e-10	5.16946e-09
RS09545	rhodanese	1.03369	8.79816	62.6853	2.42522e-15	5.46348e-14
RS09550	hypothetical_protein	0.85365	9.7536	63.472	1.62664e-15	3.7872e-14
RS09555	topology_modulation_protein	-0.509986	5.96281	21.1273	4.29771e-06	3.43393e-05
RS09560	glycerol_dehydrogenase	0.235337	6.37845	4.50684	0.0337596	0.101718
RS09565	cyclic_nucleotide-binding_protein	-5.01699	7.77252	1644.05	0	0
RS09570	bifunctional_homocysteine_S-methyltransferase/methylenetetrahydrofolate_reductase	0.75148	4.45766	23.7643	1.08882e-06	9.47803e-06
RS09575	5-methyltetrahydropteroyltriglutamate--homocysteine_S-methyltransferase	0.603631	4.14241	8.31333	0.00393552	0.0166814
RS09580	branched-chain_amino_acid_transporter	0.761218	4.94207	25.7743	3.83768e-07	3.5981e-06
RS09585	branched-chain_amino_acid_transporter_AzlC	0.424948	4.88305	6.79954	0.00911812	0.0341067
RS09590	hypothetical_protein	0.582312	5.34779	17.6265	2.68823e-05	0.000188486
RS09595	DNA-binding_response_regulator	-0.873862	6.35997	72.9138	1.35436e-17	3.87665e-16
RS09600	two-component_sensor_histidine_kinase	-0.680434	7.6051	45.1166	1.85641e-11	2.99116e-10
RS09605	hypothetical_protein	-0.786012	7.26455	75.4791	3.69294e-18	1.08252e-16
RS09610	leucine--tRNA_ligase	0.206408	10.3615	9.18294	0.00244281	0.0108753
RS09615	transposase	0.0349558	4.17703	0.0358401	0.849846	0.973954
RS09620	MFS_transporter	0.272559	6.56178	3.08244	0.0791417	0.19759
RS09625	patatin_family_protein	-0.334261	7.51803	12.1226	0.000498151	0.00261207
RS09630	hypothetical_protein	0.195348	7.95734	4.2418	0.0394404	0.115404
RS09635	hypothetical_protein	0.334179	8.62205	19.0679	1.26152e-05	9.27275e-05
RS09640	transcription_termination/antitermination_protein_NusG	-0.150562	9.75242	3.97403	0.046207	0.130419
RS09645	pathogenicity_protein	0.38606	4.27358	5.49129	0.0191115	0.0628354
RS09650	preprotein_translocase_subunit_SecE	-0.577686	8.44678	23.6888	1.13242e-06	9.82239e-06
RS09655	50S_ribosomal_protein_L33	-0.52493	7.6588	31.1294	2.41386e-08	2.66951e-07
RS09660	penicillin-binding_protein_2A	-0.184169	9.27541	4.45018	0.0348977	0.104435
RS09665	RNA_pseudouridine_synthase	0.328646	7.08799	10.2243	0.00138601	0.00656061
RS09670	hypothetical_protein	-0.771535	8.23483	79.5686	4.65768e-19	1.51095e-17
RS09675	phosphopentomutase	-0.796575	8.96853	102.664	3.97158e-24	1.99234e-22
RS09680	2-deoxyribose-5-phosphate_aldolase	-0.351721	8.64299	17.8573	2.38098e-05	0.000168155
RS09685	hypothetical_protein	-0.543089	9.67027	46.4871	9.2223e-12	1.54744e-10
RS09690	uridine_phosphorylase	-0.780426	8.26701	82.2704	1.18687e-19	4.01062e-18
RS09695	GntR_family_transcriptional_regulator	-0.879275	7.00275	61.9692	3.48869e-15	7.54487e-14
RS09700	hypothetical_protein	-1.01192	5.49495	55.8736	7.72852e-14	1.54761e-12
RS09705	molecular_chaperone_GroEL	-0.604978	10.9907	57.1208	4.09846e-14	8.37945e-13
RS09710	co-chaperone_GroES	-0.467719	8.43492	32.0432	1.50781e-08	1.73451e-07
RS09715	ABC_transporter_ATP-binding_protein	0.754928	5.95103	38.0994	6.72296e-10	8.96272e-09
RS09730	haloacid_dehalogenase	0.272726	5.82492	4.62841	0.0314467	0.0960576
RS09735	glyoxalase	-0.607567	3.28808	6.66528	0.00983091	0.0362546
RS09740	peroxide_stress_protein_YaaA	0.20187	6.70974	3.96295	0.0465122	0.130901
RS09745	anaerobic_ribonucleoside-triphosphate_reductase_activating_protein	-0.512609	6.33508	21.0909	4.37997e-06	3.4882e-05
RS09750	GNAT_family_acetyltransferase	-0.503957	8.77059	33.7497	6.26774e-09	7.54921e-08
RS09755	hypothetical_protein	-0.512437	8.9716	31.3943	2.10602e-08	2.3397e-07
RS09760	hypothetical_protein	-0.332156	7.7266	13.0929	0.000296424	0.00167138
RS09765	anaerobic_ribonucleoside-triphosphate_reductase	0.270206	8.43503	6.5929	0.0102386	0.037516
RS09770	hypothetical_protein	0.302498	9.54664	17.9929	2.21732e-05	0.000157702
RS09775	hypothetical_protein	-0.210744	2.17577	0.415183	0.51935	0.733677
RS09780	hypothetical_protein	-0.96447	11.3397	158.769	2.10205e-36	2.55715e-34
RS09785	Holliday_junction_resolvase_RuvX	-0.975867	10.5916	143.229	5.23721e-33	4.6335e-31
RS09790	hypothetical_protein	-1.0945	9.81986	201.072	1.21859e-45	2.47069e-43
RS09795	arsenate_reductase	-0.967848	12.1315	101.219	8.23362e-24	4.04695e-22
RS09800	DNA_recombination/repair_protein_RecA	-0.0313003	10.3701	0.171904	0.678425	0.859634
RS09805	damage-inducible_protein_A	-0.38409	7.75356	21.9935	2.73579e-06	2.24114e-05
RS09810	DNA-3-methyladenine_glycosylase_I	0.341415	7.46731	12.8642	0.000334928	0.0018478
RS09815	Holliday_junction_branch_migration_protein_RuvA	0.121161	7.37858	1.96767	0.160695	0.333451
RS09820	MFS_transporter	0.0625548	8.45127	0.709861	0.39949	0.621656
RS09825	DNA_mismatch_repair_protein_MutL	0.00530546	9.10131	0.00517008	0.942679	1
RS09830	cold-shock_protein	-0.195449	12.5267	7.46362	0.00629581	0.0247659
RS09835	DNA_mismatch_repair_protein_MutS	-0.0666385	8.92658	0.873771	0.349914	0.567182
RS09840	arginine_repressor	-0.504601	7.35326	33.1758	8.41929e-09	9.96795e-08
RS09845	arginine--tRNA_ligase	0.0369433	10.1384	0.235339	0.627593	0.825146
RS09850	bacteriocin_immunity_protein	-0.476106	7.6908	33.3691	7.62258e-09	9.0467e-08
RS09855	membrane_protein	0.0147904	7.93189	0.0288334	0.865164	0.981784
RS09860	membrane_protein	0.346875	9.13097	19.8152	8.53037e-06	6.43547e-05
RS09865	aspartate--tRNA_ligase	0.0175315	10.3165	0.0753245	0.783736	0.93495
RS09870	histidine--tRNA_ligase	-0.0980321	9.52578	1.92513	0.165293	0.340811
RS09875	50S_ribosomal_protein_L32	0.388678	11.0581	27.145	1.88756e-07	1.86306e-06
RS09880	50S_ribosomal_protein_L33	0.392368	10.2257	18.3738	1.81533e-05	0.000131059
RS09885	cadmium_transporter	-0.672139	6.25885	26.3253	2.8848e-07	2.74705e-06
RS09890	transcriptional_regulator	-0.56579	6.22248	27.6934	1.42147e-07	1.42323e-06
RS09895	transcriptional_regulator	-0.580217	7.70612	41.9974	9.13955e-11	1.3684e-09
RS09900	DNA-directed_RNA_polymerase_sigma-70_factor	-0.584063	0.146702	0.579506	0.446506	0.665451
RS09905	hypothetical_protein	-0.571889	1.84202	2.477	0.115523	0.261579
RS09910	cell_division_protein_FtsK	-0.673412	2.64526	6.73269	0.00946616	0.0352159
RS09915	hypothetical_protein	-0.819083	3.14305	13.7842	0.000205054	0.00121091
RS09920	hypothetical_protein	-0.524259	1.16716	1.26419	0.260859	0.471671
RS09925	hypothetical_protein	-0.98157	2.00113	8.8642	0.00290817	0.0127144
RS09930	site-specific_integrase	-0.966026	10.8562	169.563	9.21727e-39	1.28146e-36
RS09935	peptidase	-1.30535	2.71636	26.3501	2.84798e-07	2.72264e-06
RS09940	DNA-binding_response_regulator	-0.459189	6.65537	19.3963	1.0621e-05	7.89037e-05
RS09945	two-component_sensor_histidine_kinase	-0.213539	8.20633	8.11368	0.00439323	0.0183183
RS09950	hypothetical_protein	0.245907	2.39386	0.52943	0.466847	0.688019
RS09955	carbamate_kinase	0.88727	1.55503	3.59832	0.0578379	0.156508
RS09960	ornithine_carbamoyltransferase_12C_catabolic	0.431528	1.88608	1.01481	0.313754	0.532332
RS09965	sensor_histidine_kinase	-0.289817	6.72188	6.10712	0.0134638	0.0471671
RS09970	hypothetical_protein	-0.551292	2.60182	2.89719	0.088734	0.217603
RS09975	glycine/betaine_ABC_transporter_ATP-binding_protein	-0.562874	8.35292	29.9474	4.43925e-08	4.77907e-07
RS09980	glycine/betaine_ABC_transporter_permease	-0.319744	10.1207	14.5962	0.000133182	0.000818523
RS09985	hypothetical_protein	0.0109869	10.038	0.019341	0.889393	0.996497
RS09990	hypothetical_protein	-0.170293	8.37467	3.13088	0.0768223	0.192988
RS09995	membrane_protein	0.181416	4.20596	1.31194	0.252044	0.46148
RS10000	membrane_protein	0.334488	5.74704	5.48655	0.0191633	0.0629209
RS10005	TetR_family_transcriptional_regulator	0.356074	5.17574	5.89814	0.0151569	0.0520491
RS10010	hypothetical_protein	0.180854	2.08829	0.273299	0.601127	0.799859
RS10015	hypothetical_protein	-0.490475	9.26277	48.8596	2.74959e-12	4.83015e-11
RS10020	hypothetical_protein	-0.792996	7.83218	59.61	1.15644e-14	2.43604e-13
RS10025	ArpU_family_transcriptional_regulator	-0.75511	1.74942	3.54658	0.0596685	0.159181
RS10030	hypothetical_protein	-0.0998005	0.958528	0.0373305	0.846794	0.972534
RS10035	hypothetical_protein	0.188981	2.17324	0.277726	0.598195	0.797048
RS10040	hypothetical_protein	-0.253435	2.76631	0.799011	0.371389	0.589861
RS10045	DNA_damage-inducible_protein_DnaD	-0.0390439	1.93637	0.0127683	0.910033	1
RS10050	hypothetical_protein	0.806161	0.526304	1.41281	0.23459	0.437934
RS10055	hypothetical_protein	-1.04791	0.692202	3.33065	0.0679999	0.17563
RS10060	hypothetical_protein	-0.336502	1.02946	0.323867	0.569293	0.777267
RS10065	hypothetical_protein	0.46515	0.532127	0.50169	0.478758	0.697513
RS10070	hypothetical_protein	0.304717	0.852392	0.299493	0.5842	0.788788
RS10075	hypothetical_protein	1.12718	4.96508	35.5267	2.5158e-09	3.17147e-08
RS10080	hypothetical_protein	0.622304	7.9593	19.9741	7.84972e-06	5.94965e-05
RS10085	hypothetical_protein	-0.502887	1.60746	1.05759	0.303766	0.52065
RS10090	hypothetical_protein	0.543511	1.36236	1.2192	0.269518	0.48376
RS10095	phage_repressor_protein	0.608408	0.87651	1.08865	0.296771	0.511906
RS10100	transcriptional_regulator	-0.00877215	0.712957	0.000225675	0.988014	1
RS10105	transcriptional_regulator	-0.528351	7.44739	24.5071	7.40365e-07	6.67151e-06
RS10110	hypothetical_protein	-0.55028	5.49172	15.2272	9.53199e-05	0.000603156
RS10115	hypothetical_protein	-0.320877	5.03697	5.39	0.0202525	0.065963
RS10120	hypothetical_protein	-0.192036	5.32424	1.56086	0.21154	0.404144
RS10125	hypothetical_protein	-0.159245	7.58558	2.89659	0.0887672	0.217603
RS10130	site-specific_integrase	0.336607	6.86618	7.11168	0.00765833	0.0293757
RS10135	30S_ribosomal_protein_S4	0.791755	12.0254	112.132	3.34353e-26	1.84882e-24
RS10140	hypothetical_protein	0.0692868	9.03662	0.639428	0.423918	0.646236
RS10145	replicative_DNA_helicase	0.0535039	10.0189	0.528951	0.467048	0.688058
RS10150	50S_ribosomal_protein_L9	0.00807478	8.5803	0.0100545	0.920128	1
RS10155	DHH_family_phosphoesterase	-0.0343371	9.99562	0.23493	0.627892	0.825317
RS10160	tRNA_uridine-5-carboxymethylaminomethyl(34)_synthesis_enzyme_MnmG	-6.48154e-05	9.30813	6.10936e-07	0.999376	1
RS10165	membrane_protein	0.824537	8.06575	41.9773	9.23414e-11	1.37832e-09
RS10170	tRNA_2-thiouridine(34)_synthase_MnmA	0.671631	8.29462	63.1885	1.87846e-15	4.33204e-14
RS10175	L-serine_dehydratase2C_iron-sulfur-dependent_subunit_beta	-0.417145	8.74225	22.9113	1.69654e-06	1.43074e-05
RS10180	L-serine_dehydratase2C_iron-sulfur-dependent_subunit_alpha	-0.366668	9.49968	19.8991	8.16379e-06	6.16848e-05
RS10185	transglycosylase	1.04418	7.73954	126.885	1.96862e-29	1.40872e-27
RS10190	peptidoglycan-binding_protein_LysM	-0.0952205	6.19621	0.687444	0.407035	0.62869
RS10195	transporter	0.961297	7.88536	92.1704	7.95258e-22	3.25187e-20
RS10200	energy-coupling_factor_transporter_ATPase	0.570497	7.78752	48.1747	3.89881e-12	6.79986e-11
RS10205	energy-coupling_factor_transporter_ATPase	0.115543	9.42733	2.56558	0.109212	0.250631
RS10210	CDP-diacylglycerol--glycerol-3-phosphate_3-phosphatidyltransferase	0.0112986	8.39062	0.0216552	0.883008	0.992772
RS10215	peptidase_M16	0.0490957	8.77082	0.454778	0.500075	0.718655
RS10220	peptidase_M16	-0.23608	8.14864	6.54874	0.0104958	0.0383141
RS10225	hypothetical_protein	-0.364084	7.44293	17.0717	3.59955e-05	0.000244629
RS10230	DNA_replication_and_repair_protein_RecF	-0.235886	9.27659	12.0003	0.000531931	0.00276241
RS10235	sugar_transporter	0.276333	8.66164	13.1054	0.000294451	0.00166218
RS10240	transcriptional_regulator	0.190441	7.4995	2.8433	0.0917556	0.222574
RS10245	IMP_dehydrogenase	-0.270897	10.8869	15.1672	9.83991e-05	0.000619031
RS10250	arginine_repressor	-0.181838	8.12924	4.90411	0.0267928	0.0836265
RS10255	ArcR_family_transcriptional_regulator	-0.30418	8.04204	13.1623	0.000285637	0.00161994
RS10260	hypothetical_protein	-0.328396	5.65655	5.18152	0.0228284	0.0729849
RS10265	arginine_deiminase	0.590484	10.2532	51.711	6.43005e-13	1.18968e-11
RS10270	GNAT_family_N-acetyltransferase	-0.0262007	5.49495	0.0486768	0.825382	0.962913
RS10275	ornithine_carbamoyltransferase	-0.0162288	7.22042	0.0138032	0.906474	1
RS10280	arginine-ornithine_antiporter	-0.130597	6.77749	0.889626	0.345579	0.562392
RS10285	carbamate_kinase	-0.0362822	6.20368	0.0478926	0.826772	0.963439
RS10290	tryptophan--tRNA_ligase	-0.0388015	9.56564	0.270753	0.602827	0.801682
RS10295	DUF1275_family_protein	-0.40571	7.4149	15.3165	9.09198e-05	0.000579535
RS10300	membrane_protein	-0.4478	7.96318	27.796	1.34801e-07	1.35246e-06
RS10305	ABC-F_family_ATPase	-0.0498199	11.0987	0.570835	0.449927	0.668911
RS10310	copper_ABC_transporter_permease	-0.000844417	9.24173	0.000142203	0.990486	1
RS10330	23S_rRNA_(pseudouridine(1915)-N(3))-methyltransferase_RlmH	-0.0757403	6.76779	0.622328	0.430184	0.653517
RS10335	serine_protease	-1.3183	9.28432	184.527	4.97886e-42	8.07571e-40
RS10340	chromosome_partitioning_protein_ParB	-0.509311	7.93017	36.9638	1.20343e-09	1.56575e-08
RS10355	transcriptional_regulator	-0.814149	2.79871	10.9965	0.000912863	0.00451881
RS10360	hypothetical_protein	-1.45561	11.672	351.498	1.9996e-78	8.84549e-76
RS10365	hypothetical_protein	-0.041051	4.6862	0.0845649	0.771204	0.924761
RS10370	hypothetical_protein	-0.454845	4.74737	11.9375	0.000550155	0.00284793
RS10375	hypothetical_protein	-0.336323	3.80151	3.19132	0.0740303	0.187267
RS10380	hypothetical_protein	-0.253887	2.6075	0.682409	0.408758	0.630634
RS10385	hypothetical_protein	0.405069	0.351011	0.316358	0.573805	0.78028
RS10390	endonuclease	-0.345639	5.67829	7.3784	0.00660119	0.0257796
RS10395	hypothetical_protein	0.355064	9.05339	4.15044	0.0416237	0.120417
RS10400	hypothetical_protein	0.239883	1.5063	0.334709	0.562899	0.771165
RS10405	competence_protein_CglA	-0.269407	2.07063	0.654599	0.418473	0.641154
RS10410	hypothetical_protein	0.133231	4.41388	0.730784	0.392629	0.613896
RS10415	hypothetical_protein	1.36858	0.0759431	2.16951	0.140771	0.303631
RS10420	hypothetical_protein	0.672229	3.36693	9.21772	0.00239684	0.0107
RS10425	hypothetical_protein	0.58937	3.64645	8.4273	0.00369629	0.015805
RS10430	hypothetical_protein	-0.367577	6.9479	9.68698	0.00185578	0.00852713
RS10440	hypothetical_protein	0.319978	3.64258	2.87855	0.089767	0.218887
RS10445	hypothetical_protein	0.151271	0.0793875	0.0335597	0.854646	0.973954
RS10450	hypothetical_protein	-0.616661	0.840755	1.31455	0.251572	0.46148
RS10455	hypothetical_protein	0.692996	1.35681	2.29564	0.129738	0.285483
RS10460	hypothetical_protein	0.039108	1.43585	0.00472274	0.945211	1
RS10470	IS3_family_transposase	0.168465	5.61241	1.84893	0.173908	0.354965
RS10475	hypothetical_protein	0.0916007	0.952435	0.0306831	0.860949	0.978601
RS10480	site-specific_integrase	-0.126956	5.99764	1.07233	0.300419	0.516004
RS10485	hypothetical_protein	0.678285	8.15245	61.9959	3.44172e-15	7.54388e-14
RS10490	hypothetical_protein	-0.6166	0.83057	1.3143	0.251618	0.46148
RS10495	site-specific_integrase	-0.642144	0.909338	1.03154	0.309798	0.526538
RS10500	hypothetical_protein	0.523315	7.1576	29.6521	5.16962e-08	5.52866e-07
RS10505	NINE_protein	-0.971022	2.68349	14.2579	0.000159394	0.0009623
RS10510	hypothetical_protein	-1.13085	8.06728	164.555	1.14426e-37	1.54666e-35
RS10515	TetR_family_transcriptional_regulator	-0.0693591	4.67202	0.13382	0.714504	0.880196
RS10520	plasmid_mobilization_relaxosome_protein_MobC	-0.447648	0.64481	0.54619	0.459879	0.679553
RS10525	hypothetical_protein	-0.0297039	0.0166816	0.00122816	0.972044	1
RS10530	hypothetical_protein	-0.108829	5.15254	0.76826	0.380756	0.59921
RS10535	hypothetical_protein	-0.137684	6.09911	1.55491	0.212413	0.405333
RS10540	ABC_transporter_ATP-binding_protein	0.697657	4.00797	14.2319	0.000161608	0.000974451
RS10545	hypothetical_protein	-0.584069	0.148828	0.579517	0.446502	0.665451
RS10550	alpha/beta_hydrolase	-0.582994	2.23245	3.71189	0.0540263	0.148527
RS10555	hypothetical_protein	-0.856198	8.86776	91.8237	9.47535e-22	3.8105e-20
RS10560	cell_wall_surface_anchor	0.299211	4.07297	2.38254	0.122698	0.275484
RS10565	MarR_family_transcriptional_regulator	0.115685	9.22261	1.30104	0.254023	0.463039
RS10570	hypothetical_protein	-1.45446	-0.586881	1.17158	0.279077	0.490929
RS10575	hypothetical_protein	0.278825	4.92823	4.01712	0.0450406	0.127794
RS10585	hypothetical_protein	-0.221553	-0.415462	0.0367502	0.847975	0.972534
RS10590	tetracycline_resistance_protein	-0.445323	4.42765	6.69543	0.00966601	0.0358224
RS10595	conjugal_transfer_protein	1.037	5.68521	39.8217	2.78239e-10	3.94726e-09
RS10600	conjugal_transfer_protein	-0.462262	2.3387	2.53621	0.111261	0.253463
RS10605	hypothetical_protein	-0.593679	4.75345	16.1898	5.73033e-05	0.000377829
RS10610	hypothetical_protein	-0.443289	4.82719	10.3333	0.00130655	0.006233
RS10615	hypothetical_protein	-0.575462	4.60583	14.9554	0.000110081	0.00068323
RS10620	hypothetical_protein	-0.10923	5.7834	0.689786	0.406237	0.627938
RS10625	peptide_ABC_transporter_permease	1.50005	0.131508	2.70851	0.0998143	0.236951
RS10630	IS3_family_transposase	0.134653	6.29317	0.960628	0.327029	0.547787
RS10635	hypothetical_protein	-0.584076	0.150451	0.579531	0.446496	0.665451
RS10640	IS3_family_transposase	0.18928	5.69297	2.47398	0.115744	0.261736
RS10645	IS3_family_transposase	-0.374859	5.90461	9.87845	0.00167226	0.00775249
RS10650	transposase	-1.00381	5.67989	18.2286	1.9592e-05	0.000141027
RS10655	chromosome_partitioning_protein_ParA	0.522313	2.50072	3.31291	0.0687378	0.177066
RS10660	IS3_family_transposase	0.104247	5.17124	0.51139	0.474538	0.695513
RS10665	IS3_family_transposase	-0.528407	4.69315	10.2869	0.00133977	0.00635412
RS10670	HXXEE_domain-containing_protein	-0.352154	4.38604	5.5619	0.0183555	0.0607191
RS10675	hypothetical_protein	-0.299837	1.98672	0.778558	0.377582	0.595371
RS10680	N-acetyltransferase	0.318117	6.08815	5.87694	0.0153405	0.0525311
RS10685	hypothetical_protein	0.378548	5.79042	9.42513	0.00214032	0.00967019
RS10690	50S_ribosomal_protein_L33	0.246464	6.75812	5.595	0.0180118	0.0597448
RS10695	hypothetical_protein	-0.478528	-0.103152	0.280341	0.596478	0.795367
RS10700	hypothetical_protein	-0.0402373	1.73058	0.0115895	0.91427	1
RS10705	CAAX_protease_family_protein	0.382278	4.84459	7.89305	0.00496252	0.0202072
RS10710	hypothetical_protein	0.146833	6.20584	1.12613	0.288603	0.50145
RS10715	hypothetical_protein	-0.360265	2.4526	1.66121	0.19744	0.385221
RS10720	membrane_protein	0.0171295	7.77278	0.0447579	0.83245	0.966985
RS10725	hypothetical_protein	-0.421168	6.05515	15.2897	9.22158e-05	0.000586565
RS10730	hypothetical_protein	0.185818	2.96417	0.612513	0.433843	0.657048
RS10735	hypothetical_protein	0.832176	1.35838	2.3828	0.122678	0.275484
RS10740	hypothetical_protein	2.36662	-0.697403	1.77613	0.182626	0.36346
RS10745	hypothetical_protein	-0.155353	4.28931	0.787156	0.374961	0.593262
RS10750	high-affinity_branched-chain_amino_acid_ABC_transporter_ATP-binding_protein_LivG	-0.232928	3.50346	1.14576	0.284439	0.495573
RS10755	hypothetical_protein	0.170209	6.9893	1.08991	0.296492	0.511723
RS10760	hypothetical_protein	0.17597	4.62041	1.5971	0.206315	0.396967
RS10765	hypothetical_protein	0.0908579	4.56984	0.264393	0.607118	0.806507
RS10770	hypothetical_protein	0.0130453	5.40062	0.0117659	0.913622	1
RS10775	hypothetical_protein	-0.257257	5.3596	4.59137	0.0321333	0.0977255
RS10780	hypothetical_protein	-0.0673074	3.98484	0.15544	0.69339	0.868925
RS10785	hypothetical_protein	-0.103747	4.88626	0.356675	0.550359	0.763193
RS10790	hypothetical_protein	-0.467049	4.75577	12.7877	0.000348907	0.00191192
RS10795	hypothetical_protein	-0.385521	5.34891	9.24231	0.00236486	0.0105837
RS10800	hypothetical_protein	0.30511	2.15628	0.899042	0.343039	0.562392
RS10805	hypothetical_protein	-0.635496	3.68533	9.48263	0.00207427	0.00938919
RS10810	hypothetical_protein	-0.339235	2.07406	1.07266	0.300346	0.516004
RS10815	hypothetical_protein	0.368361	7.67368	12.3829	0.000433291	0.00229673
RS10820	hypothetical_protein	0.142749	-0.333909	0.0167843	0.896919	0.998052
RS10825	hypothetical_protein	0.593079	6.74893	28.4584	9.57314e-08	9.80693e-07
RS10830	hypothetical_protein	0.0866873	4.4316	0.216197	0.641953	0.834333
RS10835	hypothetical_protein	1.72054	-0.19018	2.23932	0.13454	0.29306
RS10840	IS3_family_transposase	0.20005	5.56389	2.58542	0.107852	0.248619
RS10845	hypothetical_protein	1.39443	1.01877	5.98954	0.0143909	0.0497452
RS10850	peptide_hormone	0.0272138	1.40778	0.00403446	0.949355	1
RS10855	hypothetical_protein	-0.0827486	4.83894	0.347247	0.555676	0.768159
RS10860	hypothetical_protein	-0.145406	13.5803	1.80778	0.178775	0.362618
RS10865	membrane_protein	0.567687	11.1685	23.8348	1.04965e-06	9.15338e-06
RS10870	IS3_family_transposase	0.0307542	5.70523	0.0705136	0.790591	0.937838
RS10875	hypothetical_protein	-0.616044	-0.694292	0.166801	0.682971	0.859634
RS10880	ABC_transporter_permease	0.474856	6.13621	15.4238	8.58978e-05	0.000551423
RS10885	hypothetical_protein	2.36662	-0.697403	1.77613	0.182626	0.36346
RS10890	FanG_protein	3.21949	-0.511226	3.55217	0.0594677	0.158733
RS10895	hypothetical_protein	-0.819145	0.903547	2.50067	0.113798	0.258034

## Sheet: combined
Supplementary Table 4: Full RNASeq dataset comparing WT COH1 and COH1ΔciaR strains grown to OD600 = 0.5
id	function	logFC	logCPM	LR	PValue	FDR	baseMean_deseq	log2FoldChange_deseq	log2FoldChange_deseq_inverse	lfcSE_deseq	stat_deseq	pvalue_deseq	padj_deseq	mean_FC	norm_count_cmp	norm_count_base	mean_norm_count	signif(<0.05)	mean_log2>1	Both
RS00255	aminotransferase_A	-1.72554	10.0852	403.903	7.78534e-90	4.73543e-87	3908.34	1.75551	-1.75551	0.0726473	24.1649	5.20661e-129	1.47198e-126	-1.74053	0.10506	0.137255	0.121157	1	1	TRUE
RS00260	DNA_repair_protein_RecO	-1.65871	10.3747	324.022	1.92695e-72	7.21272e-70	4775.82	1.68553	-1.68553	0.0796571	21.1598	2.24018e-99	3.69442e-97	-1.67212	0.108075	0.16772	0.137897	1	1	TRUE
RS00280	phosphoribosylaminoimidazolesuccinocarboxamide_synthase	-1.30954	2.40718	16.9831	3.77139e-05	0.000255237	18.9035	1.06274	-1.06274	0.330436	3.21618	0.00129911	0.00294833	-1.18614	0.0250761	0.000663862	0.01287	1	1	TRUE
RS00315	hypothetical_protein	-2.94488	3.77199	159.46	1.48432e-36	1.90072e-34	50.6541	2.59504	-2.59504	0.262442	9.88804	4.69129e-23	5.91341e-22	-2.76996	0.0392936	0.0017789	0.0205362	1	1	TRUE
RS00785	CTP_synthetase	-0.98396	12.1649	97.9624	4.26393e-23	1.99503e-21	16457.6	1.01865	-1.01865	0.0815868	12.4855	8.95916e-36	2.33292e-34	-1.00131	0.126725	0.577965	0.352345	1	1	TRUE
RS01085	DNA-directed_RNA_polymerase_subunit_beta	1.04708	11.561	189.288	4.54622e-43	7.90069e-41	10716.5	-0.994581	0.994581	0.0688288	-14.4501	2.50472e-47	9.79111e-46	1.02083	0.120433	0.376348	0.248391	1	1	TRUE
RS02875	hypothetical_protein	-2.3515	8.2004	497.325	3.63077e-110	2.5239e-107	1062.25	2.36452	-2.36452	0.0905706	26.107	3.0391e-150	1.0024e-147	-2.35801	0.0854252	0.0373048	0.061365	1	1	TRUE
RS03025	zinc_ABC_transporter_substrate-binding_protein_AdcA	1.04531	8.85508	91.3965	1.17586e-21	4.65181e-20	1638.37	-0.986781	0.986781	0.0930821	-10.6012	2.94225e-26	4.41114e-25	1.01605	0.092245	0.0575371	0.0748911	1	1	TRUE
RS03115	IS3_family_transposase	1.14962	3.54322	29.346	6.05421e-08	6.39041e-07	38.0724	-0.953885	0.953885	0.264585	-3.60522	0.000311894	0.000772513	1.05175	0.0369105	0.00133705	0.0191238	1	1	TRUE
RS03120	CsbD_family_protein	-1.12952	11.2078	152.096	6.03664e-35	6.52762e-33	8486.28	1.16148	-1.16148	0.0803818	14.4496	2.52323e-47	9.79111e-46	-1.1455	0.116753	0.298026	0.20739	1	1	TRUE
RS03370	hypothetical_protein	1.90462	2.04485	23.3723	1.33485e-06	1.1476e-05	11.7086	-1.18269	1.18269	0.368646	-3.20821	0.00133566	0.00302433	1.54366	0.0213016	0.000411189	0.0108564	1	1	TRUE
RS03375	hypothetical_protein	1.53562	2.99736	26.3005	2.92218e-07	2.77722e-06	25.0318	-1.18726	1.18726	0.312654	-3.79736	0.000146245	0.000382829	1.36144	0.0312241	0.000879081	0.0160516	1	1	TRUE
RS03380	peptidase_S8	1.14287	4.47921	54.4915	1.56124e-13	3.03879e-12	75.6459	-1.00585	1.00585	0.203827	-4.93482	8.02264e-07	2.80509e-06	1.07436	0.0466608	0.00265657	0.0246587	1	1	TRUE
RS03395	peptidase_M13	-1.44548	1.76407	15.427	8.5753e-05	0.000551388	11.5556	1.04458	-1.04458	0.363468	2.87393	0.00405401	0.00846296	-1.24503	0.0183766	0.000405817	0.00939123	1	1	TRUE
RS03665	ABC_transporter_permease	-1.00913	10.1731	158.963	1.90644e-36	2.37865e-34	4139.66	1.04567	-1.04567	0.0707841	14.7727	2.19886e-49	9.67011e-48	-1.0274	0.105975	0.145379	0.125677	1	1	TRUE
RS03670	hypothetical_protein	-1.0964	7.66808	127.295	1.60109e-29	1.16282e-27	729.804	1.12682	-1.12682	0.0907397	12.4182	2.0818e-35	5.3505e-34	-1.11161	0.0798798	0.0256296	0.0527547	1	1	TRUE
RS03885	ABC_transporter_permease	1.12853	5.97569	64.5343	9.4867e-16	2.26286e-14	219.179	-1.04625	1.04625	0.142997	-7.3166	2.54324e-13	1.70036e-12	1.08739	0.06225	0.00769724	0.0349736	1	1	TRUE
RS04365	hypothetical_protein	-1.10472	7.5334	76.0998	2.69679e-18	8.00156e-17	665.576	1.12437	-1.12437	0.112442	9.99961	1.52996e-23	2.01853e-22	-1.11455	0.0784769	0.0233741	0.0509255	1	1	TRUE
RS04480	type_II_CRISPR_RNA-guided_endonuclease_Cas9	1.04559	7.44782	91.4293	1.15651e-21	4.61277e-20	615.118	-0.984156	0.984156	0.100097	-9.83199	8.19788e-23	1.02035e-21	1.01487	0.0775853	0.021602	0.0495937	1	1	TRUE
RS04505	nucleoside-diphosphate_kinase	-1.1459	11.1624	199.504	2.67974e-45	5.21584e-43	8223.99	1.18175	-1.18175	0.0704881	16.7652	4.3829e-63	2.99095e-61	-1.16383	0.116281	0.288815	0.202548	1	1	TRUE
RS04590	glutamine--fructose-6-phosphate_aminotransferase	-2.38571	11.9578	181.844	1.91784e-41	3.01039e-39	14336.3	2.23218	-2.23218	0.214547	10.4041	2.37392e-25	3.45441e-24	-2.30895	0.124566	0.503471	0.314019	1	1	TRUE
RS04595	hypothetical_protein	1.32739	6.64963	156.955	5.23642e-36	6.21474e-34	351.23	-1.25645	1.25645	0.112711	-11.1475	7.36172e-29	1.31251e-27	1.29192	0.0692704	0.0123347	0.0408026	1	1	TRUE
RS04640	sugar_ABC_transporter_ATP-binding_protein	1.25423	8.55006	207.399	5.07376e-47	1.07343e-44	1324.05	-1.19562	1.19562	0.0817061	-14.6332	1.726e-48	6.97092e-47	1.22492	0.0890676	0.0464988	0.0677832	1	1	TRUE
RS04645	ABC_transporter_permease	1.44134	8.80202	284.728	7.00467e-64	2.27231e-61	1575.89	-1.38158	1.38158	0.0791489	-17.4555	3.12574e-68	2.81174e-66	1.41146	0.0916923	0.0553429	0.0735176	1	1	TRUE
RS04650	ABC_transporter_permease	1.42179	9.50458	208.057	3.64529e-47	8.44665e-45	2569.08	-1.35918	1.35918	0.0890254	-15.2673	1.26318e-52	6.24957e-51	1.39049	0.0990111	0.0902222	0.0946166	1	1	TRUE
RS04680	hypothetical_protein	-2.0267	10.3125	622.693	1.94121e-137	2.36148e-134	4581.12	2.05581	-2.05581	0.0696644	29.5101	2.13504e-191	8.45048e-189	-2.04125	0.107427	0.160882	0.134155	1	1	TRUE
RS04770	transcriptional_regulator	1.78441	3.65945	72.5033	1.66755e-17	4.71763e-16	40.6782	-1.49765	1.49765	0.269319	-5.56087	2.68436e-08	1.11839e-07	1.64103	0.0381212	0.00142856	0.0197749	1	1	TRUE
RS04840	DNA-binding_response_regulator	-0.998581	6.38003	70.0299	5.84135e-17	1.57911e-15	298.846	1.01878	-1.01878	0.120931	8.42442	3.62528e-17	3.35254e-16	-1.00868	0.066462	0.010495	0.0384785	1	1	TRUE
RS04885	DNA-binding_response_regulator	-5.83972	7.41248	1723.15	0	0	621.121	5.61355	-5.61355	0.160487	34.9781	4.83571e-268	2.39247e-265	-5.72664	0.0772172	0.0218129	0.049515	1	1	TRUE
RS05030	cell_surface_protein	-1.25851	8.14027	88.4201	5.29301e-21	1.98121e-19	1012.95	1.27924	-1.27924	0.10959	11.6729	1.7524e-31	3.72902e-30	-1.26887	0.0847987	0.0355732	0.060186	1	1	TRUE
RS05130	carbamoyl_phosphate_synthase_large_subunit	1.13155	6.49679	36.9354	1.22109e-09	1.58449e-08	316.42	-1.04128	1.04128	0.15961	-6.52392	6.84921e-11	3.62422e-10	1.08642	0.0676783	0.0111122	0.0393953	1	1	TRUE
RS05135	carbamoyl_phosphate_synthase_small_subunit	1.36492	4.75117	29.0371	7.10048e-08	7.41436e-07	91.5143	-1.19744	1.19744	0.228846	-5.23251	1.67225e-07	6.37648e-07	1.28118	0.0494939	0.00321385	0.0263539	1	1	TRUE
RS05145	dihydroorotase	1.61432	6.45429	86.4021	1.46827e-20	5.37189e-19	305.92	-1.50789	1.50789	0.154715	-9.74626	1.91383e-22	2.29544e-21	1.5611	0.0672356	0.0107435	0.0389895	1	1	TRUE
RS05150	orotate_phosphoribosyltransferase	1.35096	4.95483	45.3001	1.6904e-11	2.75101e-10	105.967	-1.21315	1.21315	0.201385	-6.02404	1.70114e-09	7.92131e-09	1.28206	0.0516154	0.00372141	0.0276684	1	1	TRUE
RS06330	bifunctional_metallophosphatase/5-nucleotidase	1.35728	6.19273	138.748	5.00115e-32	4.19579e-30	254.525	-1.27861	1.27861	0.127154	-10.0556	8.67575e-24	1.16798e-22	1.31795	0.0645109	0.00893855	0.0367247	1	1	TRUE
RS06395	PTS_fructose_transporter_subunit_IIC	-2.63277	8.50653	321.314	7.49331e-72	2.60446e-69	1314.46	2.6208	-2.6208	0.113426	23.1059	4.04e-118	9.99396e-116	-2.62678	0.0886142	0.0461618	0.067388	1	1	TRUE
RS06400	1-phosphofructokinase	-2.69835	6.70687	190.504	2.46732e-43	4.44665e-41	379.524	2.63321	-2.63321	0.153478	17.1569	5.5771e-66	4.36843e-64	-2.66578	0.0698668	0.0133283	0.0415975	1	1	TRUE
RS06405	DeoR_family_transcriptional_regulator	-2.31398	6.38003	154.262	2.02988e-35	2.29707e-33	302.448	2.26274	-2.26274	0.154214	14.6727	9.6409e-49	4.05943e-47	-2.28836	0.066462	0.0106215	0.0385418	1	1	TRUE
RS06410	peptidoglycan_branched_peptide_synthesis_protein	-1.56518	9.76055	347.349	1.60103e-77	6.49219e-75	3118.39	1.59731	-1.59731	0.0708225	22.5537	1.23635e-112	2.44674e-110	-1.58124	0.101678	0.109513	0.105595	1	1	TRUE
RS06415	hypothetical_protein	-1.40911	11.4561	235.44	3.88107e-53	9.93963e-51	10091	1.44142	-1.44142	0.0756563	19.0523	6.28903e-81	7.77875e-79	-1.42527	0.119341	0.354381	0.236861	1	1	TRUE
RS07185	oleate_hydratase	-1.20424	10.2274	193.63	5.12862e-44	9.59842e-42	4304.09	1.23655	-1.23655	0.078435	15.7653	5.3917e-56	2.80794e-54	-1.22039	0.10654	0.151153	0.128847	1	1	TRUE
RS07630	acylphosphatase	-1.2123	6.09872	110.177	8.96203e-26	4.74013e-24	246.379	1.22452	-1.22452	0.125076	9.79015	1.24106e-22	1.50678e-21	-1.21841	0.0635316	0.00865247	0.036092	1	1	TRUE
RS07925	EamA_family_transporter	1.41821	6.08938	139.911	2.78418e-32	2.37681e-30	236.815	-1.33151	1.33151	0.133149	-10.0001	1.5217e-23	2.01853e-22	1.37486	0.0634342	0.00831659	0.0358754	1	1	TRUE
RS08230	universal_stress_protein_UspA	3.49652	9.38486	39.7148	2.93884e-10	4.14505e-09	2355.23	-2.17671	2.17671	0.372793	-5.83893	5.2537e-09	2.34168e-08	2.83662	0.0977639	0.0827122	0.0902381	1	1	TRUE
RS08235	MFS_transporter	2.87318	9.69147	45.1408	1.83368e-11	2.96435e-10	2916.21	-2.08451	2.08451	0.341501	-6.10397	1.03467e-09	4.92216e-09	2.47885	0.100958	0.102413	0.101685	1	1	TRUE
RS09005	22C3-cyclic-nucleotide_2-phosphodiesterase	1.24028	5.89164	103.677	2.3815e-24	1.21983e-22	206.372	-1.15608	1.15608	0.137684	-8.39666	4.59348e-17	4.18917e-16	1.19818	0.0613744	0.00724748	0.0343109	1	1	TRUE
RS09215	cell_wall_anchor	-1.26204	1.80078	8.96632	0.00275001	0.0120772	11.2539	0.850272	-0.850272	0.369853	2.29895	0.0215079	0.0385544	-1.05616	0.0187591	0.000395221	0.00957714	1	1	TRUE
RS09525	PAP2_family_phosphoesterase	-2.30991	5.24958	265.602	1.03131e-59	2.95196e-57	138.807	2.24156	-2.24156	0.16659	13.4555	2.85771e-41	9.27115e-40	-2.27573	0.0546859	0.0048747	0.0297803	1	1	TRUE
RS09545	rhodanese	1.03369	8.79816	62.6853	2.42522e-15	5.46348e-14	1576.04	-0.967894	0.967894	0.111623	-8.67111	4.27918e-18	4.19233e-17	1.00079	0.0916522	0.0553481	0.0735002	1	1	TRUE
RS09565	cyclic_nucleotide-binding_protein	-5.01699	7.77252	1644.05	0	0	795.536	4.92352	-4.92352	0.127141	38.7248	0	0	-4.97025	0.0809679	0.0279381	0.054453	1	1	TRUE
RS09700	hypothetical_protein	-1.01192	5.49495	55.8736	7.72852e-14	1.54761e-12	161.431	1.01483	-1.01483	0.149794	6.77488	1.24506e-11	7.06007e-11	-1.01338	0.057242	0.00566921	0.0314556	1	1	TRUE
RS09790	hypothetical_protein	-1.0945	9.81986	201.072	1.21859e-45	2.47069e-43	3241.81	1.13169	-1.13169	0.0660796	17.1262	9.46678e-66	6.9388e-64	-1.1131	0.102295	0.113848	0.108072	1	1	TRUE
RS09935	peptidase	-1.30535	2.71636	26.3501	2.84798e-07	2.72264e-06	22.7727	1.08755	-1.08755	0.307103	3.54132	0.000398135	0.000971528	-1.19645	0.0282968	0.000799743	0.0145483	1	1	TRUE
RS10075	hypothetical_protein	1.12718	4.96508	35.5267	2.5158e-09	3.17147e-08	106.932	-1.0101	1.0101	0.193862	-5.2104	1.88437e-07	7.11672e-07	1.06864	0.0517223	0.00375529	0.0277388	1	1	TRUE
RS10185	transglycosylase	1.04418	7.73954	126.885	1.96862e-29	1.40872e-27	754.371	-0.986008	0.986008	0.0912907	-10.8008	3.41402e-27	5.49297e-26	1.01509	0.0806243	0.0264924	0.0535584	1	1	TRUE
RS10335	serine_protease	-1.3183	9.28432	184.527	4.97886e-42	8.07571e-40	2239.83	1.34824	-1.34824	0.0844998	15.9556	2.60465e-57	1.43183e-55	-1.33327	0.0967166	0.0786596	0.0876881	1	1	TRUE
RS10360	hypothetical_protein	-1.45561	11.672	351.498	1.9996e-78	8.84549e-76	11725.6	1.48804	-1.48804	0.0696906	21.3521	3.73142e-101	6.71317e-99	-1.47182	0.12159	0.411787	0.266688	1	1	TRUE
RS10510	hypothetical_protein	-1.13085	8.06728	164.555	1.14426e-37	1.54666e-35	962.506	1.16256	-1.16256	0.0831883	13.975	2.21363e-44	8.11253e-43	-1.14671	0.0840384	0.0338018	0.0589201	1	1	TRUE
RS00005	chromosomal_replication_initiator_protein_DnaA	0.134989	8.938	2.98485	0.0840473	0.208023	1745.53	-0.0884946	0.0884946	0.0707802	-1.25027	0.2112	0.294756	0.111742	0.0931089	0.0613004	0.0772046	0	0	FALSE
RS00010	DNA_polymerase_III_subunit_beta	0.395745	9.66851	24.3642	7.97365e-07	7.14545e-06	2894.12	-0.347521	0.347521	0.0740928	-4.69034	2.7275e-06	8.9962e-06	0.371633	0.100719	0.101637	0.101178	1	0	FALSE
RS00015	diacylglycerol_kinase	-0.254433	6.17906	4.14318	0.0418025	0.120717	257.048	0.291387	-0.291387	0.126495	2.30355	0.021248	0.0381578	-0.27291	0.0643685	0.00902714	0.0366978	0	0	FALSE
RS00020	hypothetical_protein	-0.0225615	4.90245	0.0225049	0.880752	0.990922	104.954	0.0661865	-0.0661865	0.177367	0.373161	0.709028	0.773948	-0.044374	0.0510698	0.00368583	0.0273778	0	0	FALSE
RS00025	GTP-binding_protein_YchF	0.0538081	10.0313	0.570304	0.450138	0.66902	3729.2	-0.00874293	0.00874293	0.0643433	-0.135879	0.891917	0.91659	0.0312755	0.104498	0.130964	0.117731	0	0	FALSE
RS00030	aminoacyl-tRNA_hydrolase	-0.126982	5.45735	0.970812	0.324478	0.544271	155.349	0.169648	-0.169648	0.147445	1.15059	0.249902	0.339202	-0.148315	0.0568503	0.00545562	0.031153	0	0	FALSE
RS00035	transcription-repair_coupling_factor	-0.248869	9.06569	9.94361	0.00161409	0.00750874	1912.06	0.291497	-0.291497	0.0701501	4.15534	3.24809e-05	9.27556e-05	-0.270183	0.0944391	0.0671487	0.0807939	1	0	FALSE
RS00040	hypothetical_protein	-0.84001	7.6825	93.8924	3.33158e-22	1.44745e-20	735.913	0.874699	-0.874699	0.0853689	10.2461	1.23205e-24	1.74158e-23	-0.857355	0.0800301	0.0258442	0.0529372	1	0	FALSE
RS00045	septum_formation_initiation_protein	-0.628394	7.33102	47.7555	4.82833e-12	8.36109e-11	575.518	0.664289	-0.664289	0.0908949	7.30831	2.70515e-13	1.80252e-12	-0.646341	0.0763686	0.0202113	0.04829	1	0	FALSE
RS00050	hypothetical_protein	-0.462136	5.31202	13.277	0.000268683	0.00153452	141.19	0.492089	-0.492089	0.151065	3.25746	0.00112415	0.00257191	-0.477112	0.0553363	0.00495837	0.0301473	1	0	FALSE
RS00055	serine_hydrolase	-0.227652	8.75752	9.57757	0.00196969	0.0089575	1543.89	0.2709	-0.2709	0.068053	3.98072	6.87074e-05	0.000187806	-0.249276	0.0912288	0.0542192	0.072724	1	0	FALSE
RS00060	tRNA(Ile)-lysidine_synthetase	-0.118588	8.38933	2.31138	0.12843	0.283292	1195.05	0.162492	-0.162492	0.0743584	2.18526	0.02887	0.0504714	-0.14054	0.0873933	0.0419683	0.0646808	0	0	FALSE
RS00065	hypoxanthine-guanine_phosphoribosyltransferase	-0.0870282	9.37389	1.55022	0.213103	0.406333	2366.19	0.130853	-0.130853	0.0655396	1.99655	0.0458737	0.0768055	-0.108941	0.0976496	0.083097	0.0903733	0	0	FALSE
RS00070	cell_division_protein_FtsH	0.180569	11.2883	8.06128	0.00452213	0.0187274	8910.31	-0.134975	0.134975	0.0564131	-2.39262	0.0167287	0.0307678	0.157772	0.117593	0.312917	0.215255	1	0	FALSE
RS00245	CHAP_domain-containing_protein	1.02062	11.6918	148.514	3.66179e-34	3.56366e-32	11735	-0.966317	0.966317	0.0748615	-12.9081	4.05425e-38	1.13005e-36	0.993467	0.121796	0.412115	0.266955	1	0	FALSE
RS00250	ribose-phosphate_pyrophosphokinase_1	0.227139	11.1608	11.0877	0.00086904	0.00432388	8154.2	-0.180851	0.180851	0.061647	-2.93366	0.00334996	0.00708287	0.203995	0.116264	0.286364	0.201314	1	0	FALSE
RS00265	CPBP_family_intramembrane_metalloprotease	-0.428205	2.43395	2.06048	0.151162	0.317875	17.5217	0.340203	-0.340203	0.330411	1.02964	0.303181	0.398668	-0.384204	0.0253549	0.000615336	0.0129851	0	0	FALSE
RS00270	phosphate_acyltransferase	-0.180905	9.18327	5.88775	0.0152466	0.0522464	2074.38	0.224226	-0.224226	0.0699737	3.20443	0.00135329	0.00305726	-0.202566	0.0956639	0.0728493	0.0842566	0	0	FALSE
RS00275	acyl_carrier_protein	0.0179855	9.79861	0.0580835	0.809551	0.952436	3174.6	0.0271153	-0.0271153	0.0682508	0.397288	0.691155	0.760309	-0.0045649	0.102074	0.111487	0.106781	0	0	FALSE
RS00285	phosphoribosylformylglycinamidine_synthase	-0.315768	4.38634	4.70968	0.0299933	0.0923718	73.1394	0.330076	-0.330076	0.194602	1.69616	0.0898551	0.141018	-0.322922	0.0456934	0.00256855	0.024131	0	0	FALSE
RS00290	amidophosphoribosyltransferase	-0.151425	3.71949	0.522275	0.469873	0.690537	45.5374	0.185435	-0.185435	0.245947	0.753963	0.450871	0.553864	-0.16843	0.0387466	0.00159921	0.0201729	0	0	FALSE
RS00295	phosphoribosylformylglycinamidine_cyclo-ligase	-0.37088	3.45997	3.11061	0.0777837	0.194699	37.4088	0.34048	-0.34048	0.261924	1.29992	0.193628	0.272928	-0.35568	0.0360432	0.00131374	0.0186785	0	0	FALSE
RS00300	phosphoribosylglycinamide_formyltransferase	-0.0767902	2.58882	0.0824177	0.774047	0.926572	19.6505	0.0954876	-0.0954876	0.316999	0.301224	0.763244	0.815143	-0.0861389	0.0269683	0.000690096	0.0138292	0	0	FALSE
RS00305	GNAT_family_acetyltransferase	-0.245485	5.07736	2.32233	0.127529	0.281687	119.064	0.276176	-0.276176	0.172928	1.59706	0.110252	0.168389	-0.260831	0.0528918	0.00418136	0.0285366	0	0	FALSE
RS00310	bifunctional_phosphoribosylaminoimidazolecarboxamide_formyltransferase/inosine_monophosphate_cyclohydrolase	-0.194356	7.06307	3.62316	0.0569805	0.154798	475.83	0.235504	-0.235504	0.0992755	2.37223	0.0176813	0.0322798	-0.21493	0.0735774	0.0167105	0.0451439	0	0	FALSE
RS00320	peptidoglycan-binding_protein_LysM	-0.134473	9.53427	2.17967	0.139844	0.302436	2645.32	0.177767	-0.177767	0.0822718	2.16073	0.0307161	0.0532754	-0.15612	0.0993204	0.0928996	0.09611	0	0	FALSE
RS00325	N-acetylmannosamine-6-phosphate_2-epimerase	-0.386376	2.28843	1.6922	0.193312	0.380063	15.827	0.321542	-0.321542	0.335481	0.958449	0.337836	0.437265	-0.353959	0.023839	0.000555822	0.0121974	0	0	FALSE
RS00330	sugar_ABC_transporter_substrate-binding_protein	-0.85674	2.74451	9.74026	0.00180275	0.008307	23.0492	0.73006	-0.73006	0.307406	2.3749	0.0175536	0.0321059	-0.7934	0.0285901	0.000809455	0.0146998	1	0	FALSE
RS00335	sugar_ABC_transporter_permease	-0.389891	0.997803	0.604406	0.436902	0.658042	5.29998	0.219452	-0.219452	0.389287	0.56373	0.572938	0.66606	-0.304672	0.0103943	0.000186128	0.00529022	0	0	FALSE
RS00340	sugar_ABC_transporter_permease	-0.327708	1.36922	0.499906	0.479541	0.697593	7.46445	0.215967	-0.215967	0.384922	0.561067	0.574752	0.666764	-0.271837	0.0142635	0.00026214	0.0072628	0	0	FALSE
RS00345	hypothetical_protein	-0.386484	1.00395	0.556991	0.455475	0.67407	5.425	0.209597	-0.209597	0.389409	0.538244	0.590409	0.681294	-0.29804	0.0104583	0.000190518	0.0053244	0	0	FALSE
RS00350	hypothetical_protein	-0.139994	2.15352	0.155211	0.693604	0.86897	14.5059	0.152975	-0.152975	0.350394	0.436581	0.662416	0.739797	-0.146485	0.0224337	0.000509425	0.0114716	0	0	FALSE
RS00355	N-acetylneuraminate_lyase	0.172286	2.37344	0.219305	0.63957	0.833902	16.5029	-0.0928598	0.0928598	0.342389	-0.271211	0.786228	0.834735	0.132573	0.0247246	0.000579558	0.0126521	0	0	FALSE
RS00360	sugar_kinase	-0.744451	2.30236	5.76971	0.0163047	0.0551729	16.24	0.597153	-0.597153	0.337126	1.7713	0.0765104	0.122305	-0.670802	0.0239841	0.000570325	0.0122772	0	0	FALSE
RS00365	acetylxylan_esterase	-0.298363	3.42586	2.16747	0.140958	0.3039	36.7483	0.288785	-0.288785	0.258527	1.11704	0.263976	0.356593	-0.293574	0.0356878	0.00129055	0.0184892	0	0	FALSE
RS00370	MurR/RpiR_family_transcriptional_regulator	0.680409	7.27872	48.9832	2.58165e-12	4.55157e-11	548.485	-0.625469	0.625469	0.0965059	-6.48115	9.10258e-11	4.80373e-10	0.652939	0.0758239	0.019262	0.0475429	1	0	FALSE
RS00375	phosphoribosylamine--glycine_ligase	-0.6459	2.76855	6.76988	0.00927091	0.0346118	23.3036	0.581345	-0.581345	0.298221	1.94938	0.0512499	0.0845902	-0.613623	0.0288405	0.000818388	0.0148295	0	0	FALSE
RS00380	5-(carboxyamino)imidazole_ribonucleotide_mutase	-0.217928	1.52536	0.147547	0.70089	0.871355	8.43129	0.147742	-0.147742	0.385327	0.38342	0.701409	0.768588	-0.182835	0.0158899	0.000296095	0.00809302	0	0	FALSE
RS00385	5-(carboxyamino)imidazole_ribonucleotide_synthase	0.247677	3.44112	1.10379	0.293436	0.508316	36.4055	-0.173723	0.173723	0.269124	-0.645512	0.518596	0.614551	0.2107	0.0358469	0.00127851	0.0185627	0	0	FALSE
RS00390	hypothetical_protein	-0.030471	7.00034	0.0780135	0.780008	0.931415	454.874	0.0744969	-0.0744969	0.103822	0.717541	0.47304	0.573268	-0.052484	0.0729239	0.0159745	0.0444492	0	0	FALSE
RS00395	hypothetical_protein	0.277187	6.46021	5.78581	0.0161561	0.0547462	310.742	-0.22733	0.22733	0.116534	-1.95075	0.0510867	0.0843912	0.252258	0.0672972	0.0109128	0.039105	0	0	FALSE
RS00400	adenylosuccinate_lyase	0.194072	8.02598	5.36631	0.0205294	0.0666863	926.328	-0.147331	0.147331	0.0790974	-1.86265	0.0625115	0.101568	0.170702	0.0836082	0.0325313	0.0580697	0	0	FALSE
RS00405	transcriptional_regulator	-0.123437	5.07296	0.740395	0.389535	0.610459	118.209	0.1584	-0.1584	0.167144	0.94769	0.343287	0.442024	-0.140919	0.052846	0.00415131	0.0284987	0	0	FALSE
RS00410	Holliday_junction_branch_migration_DNA_helicase_RuvB	0.0716626	8.43978	0.494	0.482148	0.700338	1236.25	-0.0262407	0.0262407	0.0935034	-0.280639	0.778987	0.828825	0.0489517	0.0879189	0.0434153	0.0656671	0	0	FALSE
RS00415	hypothetical_protein	-0.52124	8.01347	31.4376	2.05955e-08	2.3145e-07	923.292	0.55953	-0.55953	0.0843668	6.63211	3.30926e-11	1.80912e-10	-0.540385	0.0834778	0.0324247	0.0579512	1	0	FALSE
RS00420	membrane_protein	-0.276397	7.86678	8.2904	0.00398551	0.0168639	832.664	0.316568	-0.316568	0.0886506	3.57096	0.000355674	0.000874385	-0.296483	0.0819498	0.0292419	0.0555959	1	0	FALSE
RS00425	acyltransferase	-0.0418424	10.937	0.371571	0.542149	0.755686	6992.63	0.0860287	-0.0860287	0.0609023	1.41257	0.157783	0.229935	-0.0639355	0.113933	0.245571	0.179752	0	0	FALSE
RS00430	bifunctional_acetaldehyde-CoA/alcohol_dehydrogenase	-0.64619	9.60484	36.5714	1.47178e-09	1.89965e-08	2786.17	0.680367	-0.680367	0.092909	7.32294	2.42595e-13	1.63298e-12	-0.663279	0.100056	0.0978462	0.0989508	1	0	FALSE
RS00435	zinc-dependent_alcohol_dehydrogenase	-0.300472	6.42306	3.32291	0.0683209	0.176179	304.754	0.335752	-0.335752	0.145169	2.31283	0.0207318	0.0372984	-0.318112	0.0669102	0.0107025	0.0388064	0	0	FALSE
RS00440	threonine_synthase	-0.478202	8.1402	30.8723	2.75574e-08	3.02696e-07	1007.94	0.518048	-0.518048	0.0814814	6.35786	2.04578e-10	1.04615e-09	-0.498125	0.0847981	0.0353973	0.0600977	1	0	FALSE
RS00445	MATE_family_efflux_transporter	-0.244998	8.27286	10.3189	0.00131673	0.00626317	1103.25	0.287586	-0.287586	0.0739311	3.88991	0.00010028	0.000268544	-0.266292	0.08618	0.0387444	0.0624622	1	0	FALSE
RS00450	30S_ribosomal_protein_S10	0.795647	10.2772	95.0999	1.81013e-22	8.15563e-21	4402.27	-0.743879	0.743879	0.06938	-10.7218	8.04096e-27	1.253e-25	0.769763	0.107059	0.154601	0.13083	1	0	FALSE
RS00455	50S_ribosomal_protein_L3	0.820601	10.9286	136.939	1.24366e-31	1.00861e-29	6917.37	-0.770744	0.770744	0.060431	-12.7541	2.95678e-37	8.0157e-36	0.795673	0.113845	0.242928	0.178387	1	0	FALSE
RS00460	50S_ribosomal_protein_L4	0.789968	11.3629	155.46	1.11065e-35	1.28677e-33	9351.03	-0.741042	0.741042	0.0545356	-13.5882	4.70326e-42	1.60478e-40	0.765505	0.11837	0.328394	0.223382	1	0	FALSE
RS00465	50S_ribosomal_protein_L23	0.748483	10.4566	124.707	5.89992e-29	4.10129e-27	4988.33	-0.699512	0.699512	0.0585029	-11.9569	5.97674e-33	1.35954e-31	0.723998	0.108928	0.175183	0.142055	1	0	FALSE
RS00470	50S_ribosomal_protein_L2	0.788996	11.8857	147.412	6.37901e-34	6.08632e-32	13434.8	-0.740207	0.740207	0.0539117	-13.73	6.71552e-43	2.37322e-41	0.764601	0.123816	0.471812	0.297814	1	0	FALSE
RS00475	30S_ribosomal_protein_S19	0.740796	10.5173	123.446	1.11359e-28	7.52598e-27	5202.93	-0.691939	0.691939	0.0571653	-12.1042	1.0036e-33	2.33661e-32	0.716368	0.109561	0.182719	0.14614	1	0	FALSE
RS00480	50S_ribosomal_protein_L22	0.727993	11.2237	96.5152	8.85626e-23	4.02753e-21	8491.78	-0.678045	0.678045	0.0627996	-10.797	3.55738e-27	5.67747e-26	0.703019	0.11692	0.298219	0.207569	1	0	FALSE
RS00485	30S_ribosomal_protein_S3	0.73125	11.8171	132.902	9.4978e-31	7.57644e-29	12816.4	-0.682836	0.682836	0.0545005	-12.529	5.18195e-36	1.38582e-34	0.707043	0.123101	0.450094	0.286597	1	0	FALSE
RS00490	50S_ribosomal_protein_L16	0.671648	11.1956	107.871	2.8689e-25	1.50108e-23	8332.46	-0.62354	0.62354	0.0570697	-10.9259	8.66478e-28	1.47824e-26	0.647594	0.116626	0.292624	0.204625	1	0	FALSE
RS00495	50S_ribosomal_protein_L29	0.687013	10.154	80.8806	2.39771e-19	7.88327e-18	4044.24	-0.637003	0.637003	0.0650473	-9.79292	1.20761e-22	1.47523e-21	0.662008	0.105776	0.142028	0.123902	1	0	FALSE
RS00500	30S_ribosomal_protein_S17	0.742019	10.9665	118.037	1.70176e-27	1.0482e-25	7104.21	-0.692951	0.692951	0.0577146	-12.0065	3.28424e-33	7.55756e-32	0.717485	0.11424	0.249489	0.181865	1	0	FALSE
RS00505	50S_ribosomal_protein_L14	0.693249	10.7304	86.1691	1.65188e-20	5.95412e-19	6032.62	-0.643689	0.643689	0.0633489	-10.161	2.95994e-24	4.0398e-23	0.668469	0.111781	0.211857	0.161819	1	0	FALSE
RS00510	50S_ribosomal_protein_L24	0.801909	10.94	114.623	9.5184e-27	5.449e-25	6972.25	-0.751674	0.751674	0.0635874	-11.8211	3.03628e-32	6.60308e-31	0.776792	0.113964	0.244855	0.179409	1	0	FALSE
RS00515	50S_ribosomal_protein_L5	0.742192	11.7447	128.107	1.06373e-29	8.08769e-28	12189	-0.693772	0.693772	0.0572139	-12.1259	7.69766e-34	1.83538e-32	0.717982	0.122347	0.428059	0.275203	1	0	FALSE
RS00520	30S_ribosomal_protein_S14_type_Z	0.739102	10.0736	117.23	2.55635e-27	1.5357e-25	3825.3	-0.689522	0.689522	0.0621154	-11.1007	1.24506e-28	2.19997e-27	0.714312	0.104939	0.134339	0.119639	1	0	FALSE
RS00525	30S_ribosomal_protein_S8	0.792479	11.1232	114.044	1.27476e-26	7.12988e-25	7916.5	-0.742035	0.742035	0.0622015	-11.9295	8.30524e-33	1.86773e-31	0.767257	0.115872	0.278016	0.196944	1	0	FALSE
RS00530	50S_ribosomal_protein_L6	0.774259	11.5918	150.903	1.10069e-34	1.13956e-32	10960.5	-0.725903	0.725903	0.0537312	-13.5099	1.36731e-41	4.58627e-40	0.750081	0.120754	0.384915	0.252835	1	0	FALSE
RS00535	50S_ribosomal_protein_L18	0.834662	10.4925	141.229	1.43371e-32	1.24579e-30	5111.17	-0.784862	0.784862	0.0595416	-13.1817	1.11772e-39	3.25289e-38	0.809762	0.109302	0.179497	0.1444	1	0	FALSE
RS00540	30S_ribosomal_protein_S5	0.760417	11.0713	144.112	3.35751e-33	3.02549e-31	7641.26	-0.711727	0.711727	0.0568223	-12.5255	5.41642e-36	1.42921e-34	0.736072	0.115332	0.26835	0.191841	1	0	FALSE
RS00545	50S_ribosomal_protein_L30	0.775331	9.93513	114.11	1.23262e-26	6.97432e-25	3473.64	-0.724897	0.724897	0.0645501	-11.23	2.90483e-29	5.52756e-28	0.750114	0.103496	0.121989	0.112743	1	0	FALSE
RS00550	50S_ribosomal_protein_L15	0.79765	10.988	145.197	1.94481e-33	1.78555e-31	7209.71	-0.748636	0.748636	0.0571775	-13.0932	3.602e-39	1.03309e-37	0.773143	0.114464	0.253194	0.183829	1	0	FALSE
RS00555	preprotein_translocase_subunit_SecY	0.775023	13.2297	116.383	3.91862e-27	2.29735e-25	34125.9	-0.725237	0.725237	0.065026	-11.153	6.92074e-29	1.25653e-27	0.75013	0.137817	1.19845	0.668134	1	0	FALSE
RS00560	adenylate_kinase	0.516912	8.73407	50.5779	1.14526e-12	2.07942e-11	1511.66	-0.468194	0.468194	0.0692301	-6.76287	1.35287e-11	7.60606e-11	0.492553	0.0909845	0.0530873	0.0720359	1	0	FALSE
RS00565	translation_initiation_factor_IF-1	0.642764	11.2947	82.2128	1.22196e-19	4.10075e-18	8926.19	-0.593949	0.593949	0.0622677	-9.53864	1.44711e-21	1.62718e-20	0.618357	0.117659	0.313475	0.215567	1	0	FALSE
RS00570	50S_ribosomal_protein_L36	0.622296	10.2261	56.7036	5.06711e-14	1.02309e-12	4256	-0.572266	0.572266	0.0763573	-7.49458	6.65102e-14	4.65102e-13	0.597281	0.106527	0.149464	0.127996	1	0	FALSE
RS00575	30S_ribosomal_protein_S13	0.734889	11.3243	137.211	1.08438e-31	8.94338e-30	9107.8	-0.686607	0.686607	0.0556167	-12.3453	5.16172e-35	1.26112e-33	0.710748	0.117968	0.319852	0.21891	1	0	FALSE
RS00580	30S_ribosomal_protein_S11	0.766276	11.6908	151.848	6.8411e-35	7.2367e-33	11740.1	-0.718	0.718	0.0533991	-13.4459	3.25335e-41	1.03845e-39	0.742138	0.121786	0.412294	0.26704	1	0	FALSE
RS00585	DNA-directed_RNA_polymerase_subunit_alpha	0.806396	12.1645	152.766	4.30957e-35	4.76599e-33	16298.1	-0.757387	0.757387	0.054432	-13.9144	5.18147e-44	1.86439e-42	0.781891	0.12672	0.572366	0.349543	1	0	FALSE
RS00590	50S_ribosomal_protein_L17	0.853536	11.9386	178.559	1.00001e-40	1.47456e-38	13935.6	-0.804251	0.804251	0.0565159	-14.2305	5.92465e-46	2.25479e-44	0.828893	0.124367	0.489397	0.306882	1	0	FALSE
RS00680	hypothetical_protein	-0.223353	3.0316	0.938449	0.332677	0.554766	27.3396	0.205985	-0.205985	0.286642	0.718615	0.472378	0.573168	-0.214669	0.0315807	0.000960128	0.0162704	0	0	FALSE
RS00685	hypothetical_protein	-0.410728	4.53369	7.80551	0.00520871	0.0210686	81.7943	0.432688	-0.432688	0.189165	2.28736	0.0221747	0.0396778	-0.421708	0.0472283	0.0028725	0.0250504	1	0	FALSE
RS00690	hypothetical_protein	-0.2866	4.80702	4.12021	0.0423737	0.122079	98.5866	0.314241	-0.314241	0.176574	1.77966	0.075132	0.120491	-0.300421	0.0500757	0.00346222	0.026769	0	0	FALSE
RS00695	hypothetical_protein	-0.634641	5.06902	20.4726	6.04911e-06	4.7096e-05	119.115	0.643703	-0.643703	0.165336	3.89331	9.88865e-05	0.000265531	-0.639172	0.052805	0.00418314	0.0284941	1	0	FALSE
RS00700	hypothetical_protein	-0.504573	9.80804	31.4289	2.06874e-08	2.31946e-07	3204.66	0.545083	-0.545083	0.0773615	7.04593	1.84227e-12	1.13225e-11	-0.524828	0.102172	0.112543	0.107358	1	0	FALSE
RS00705	hypothetical_protein	-0.60542	1.19438	1.73658	0.187573	0.371481	6.68747	0.370173	-0.370173	0.387061	0.956369	0.338886	0.438337	-0.487797	0.0124421	0.000234854	0.00633848	0	0	FALSE
RS00710	histidine_phosphatase_family_protein	-0.588736	7.32838	31.3984	2.1015e-08	2.3397e-07	574.374	0.624269	-0.624269	0.0976041	6.39593	1.59571e-10	8.26678e-10	-0.606503	0.0763412	0.0201712	0.0482562	1	0	FALSE
RS00715	D-alanyl-D-alanine_carboxypeptidase	-0.424713	8.31351	26.8848	2.15948e-07	2.1016e-06	1136.43	0.464936	-0.464936	0.0765532	6.07337	1.25254e-09	5.91594e-09	-0.444824	0.0866034	0.0399099	0.0632567	1	0	FALSE
RS00720	N-acetylmuramoyl-L-alanine_amidase	-0.200771	8.39841	6.27465	0.0122477	0.0434068	1203.66	0.24333	-0.24333	0.0772349	3.15052	0.00162982	0.00361593	-0.22205	0.0874879	0.0422707	0.0648793	1	0	FALSE
RS00725	heat-inducible_transcriptional_repressor_HrcA	-0.437836	9.26514	21.279	3.97054e-06	3.20409e-05	2198.24	0.477551	-0.477551	0.0811006	5.88837	3.90013e-09	1.75817e-08	-0.457693	0.0965167	0.077199	0.0868579	1	0	FALSE
RS00730	nucleotide_exchange_factor_GrpE	-0.358275	9.31445	17.3709	3.07502e-05	0.000213149	2273.51	0.400068	-0.400068	0.0740184	5.40499	6.4813e-08	2.59646e-07	-0.379171	0.0970304	0.0798424	0.0884364	1	0	FALSE
RS00735	molecular_chaperone_DnaK	-0.728507	11.941	81.4284	1.8173e-19	6.01562e-18	14074.5	0.76823	-0.76823	0.0675192	11.3779	5.3854e-30	1.06577e-28	-0.748369	0.124392	0.494275	0.309333	1	0	FALSE
RS00740	chaperone_DnaJ	-0.713259	10.1103	76.5287	2.17033e-18	6.47903e-17	3956.93	0.752156	-0.752156	0.0706249	10.65	1.74353e-26	2.67477e-25	-0.732708	0.105321	0.138962	0.122141	1	0	FALSE
RS00745	GntR_family_transcriptional_regulator	-0.3043	5.99875	7.24471	0.007111	0.0275275	227.207	0.341794	-0.341794	0.124407	2.74737	0.00600744	0.012119	-0.323047	0.0624902	0.00797919	0.0352347	1	0	FALSE
RS00750	tRNA_pseudouridine(38-40)_synthase_TruA	0.0277484	7.19923	0.0871525	0.767829	0.922077	522.106	0.0170061	-0.0170061	0.0944282	0.180095	0.857078	0.889437	0.00537115	0.0749958	0.0183356	0.0466657	0	0	FALSE
RS00755	hydroxymethylpyrimidine/phosphomethylpyrimidine_kinase	-0.0213619	7.1019	0.0567071	0.811778	0.954595	488.163	0.0655407	-0.0655407	0.0928434	0.705927	0.480233	0.580638	-0.0434513	0.0739819	0.0171436	0.0455627	0	0	FALSE
RS00760	membrane_protein	-0.0169398	5.6143	0.0159245	0.89958	0.998367	173.199	0.0618773	-0.0618773	0.147021	0.420874	0.673847	0.748266	-0.0394085	0.0584853	0.00608251	0.0322839	0	0	FALSE
RS00765	TIGR01440_family_protein	0.165609	6.86947	2.52044	0.112379	0.255601	414.653	-0.1188	0.1188	0.105667	-1.12429	0.26089	0.352905	0.142204	0.0715606	0.014562	0.0430613	0	0	FALSE
RS00770	mechanosensitive_ion_channel_protein	-0.080017	7.95051	0.855035	0.355132	0.571452	881.21	0.123337	-0.123337	0.0845399	1.45892	0.144588	0.212928	-0.101677	0.082822	0.0309468	0.0568844	0	0	FALSE
RS00775	trigger_factor	0.521261	12.3115	45.3676	1.6331e-11	2.66667e-10	18075.3	-0.47191	0.47191	0.0674883	-6.99246	2.70106e-12	1.63468e-11	0.496585	0.128252	0.634778	0.381515	1	0	FALSE
RS00780	DNA-directed_RNA_polymerase_subunit_delta	0.119258	9.57331	3.12256	0.0772153	0.193675	2713.31	-0.0736844	0.0736844	0.0612489	-1.20303	0.228964	0.315324	0.0964713	0.099727	0.0952875	0.0975072	0	0	FALSE
RS00790	alpha/beta_hydrolase	0.0730672	8.54992	0.939086	0.332513	0.554682	1334.32	-0.0277501	0.0277501	0.0724719	-0.382908	0.701788	0.768588	0.0504086	0.0890662	0.0468592	0.0679627	0	0	FALSE
RS01045	4-(cytidine_5-diphospho)-2-C-methyl-D-erythritol_kinase	-0.796214	8.69291	115.162	7.25143e-27	4.20065e-25	1482.26	0.834352	-0.834352	0.0700622	11.9087	1.06591e-32	2.34381e-31	-0.815283	0.0905558	0.0520548	0.0713053	1	0	FALSE
RS01050	transcriptional_regulator	-0.444411	7.79458	21.2295	4.0744e-06	3.27162e-05	792.956	0.482984	-0.482984	0.0887332	5.4431	5.23615e-08	2.12779e-07	-0.463698	0.0811976	0.0278475	0.0545225	1	0	FALSE
RS01055	zinc_ABC_transporter_ATP-binding_protein	-0.412141	8.36128	18.088	2.10928e-05	0.00015116	1175.15	0.450559	-0.450559	0.0892694	5.04719	4.48359e-07	1.61328e-06	-0.43135	0.0871011	0.0412695	0.0641853	1	0	FALSE
RS01060	zinc_ABC_transporter_permease	-0.189678	9.40551	5.83169	0.01574	0.0535225	2420.59	0.232384	-0.232384	0.0734555	3.16361	0.00155828	0.00346888	-0.211031	0.0979791	0.0850074	0.0914932	0	0	FALSE
RS01075	tyrosine--tRNA_ligase	0.248375	9.63866	12.0836	0.000508686	0.00265505	2837.12	-0.201936	0.201936	0.0661627	-3.05211	0.00227237	0.00493636	0.225155	0.100408	0.0996355	0.100022	1	0	FALSE
RS01080	penicillin-binding_protein_1B	0.202903	10.5417	8.65265	0.00326586	0.0140884	5308.56	-0.157076	0.157076	0.0610518	-2.57283	0.010087	0.0193808	0.17999	0.109815	0.186429	0.148122	1	0	FALSE
RS01310	23S_rRNA_(guanosine(2251)-2-O)-methyltransferase_RlmB	-0.185994	8.01151	3.85322	0.0496505	0.137742	919.553	0.229297	-0.229297	0.0869722	2.63644	0.00837814	0.0164324	-0.207645	0.0834574	0.0322934	0.0578754	0	0	FALSE
RS01315	hypothetical_protein	0.237596	7.38028	5.25876	0.0218365	0.0703686	591.192	-0.188981	0.188981	0.0989563	-1.90974	0.0561661	0.0922429	0.213289	0.0768818	0.0207618	0.0488218	0	0	FALSE
RS01320	fatty_acid-binding_protein_DegV	0.879566	10.0154	122.459	1.832e-28	1.20466e-26	3670.28	-0.827971	0.827971	0.0694171	-11.9275	8.51256e-33	1.89285e-31	0.853768	0.104332	0.128895	0.116613	1	0	FALSE
RS01325	transcriptional_regulator	0.552867	3.52246	6.83959	0.00891595	0.0334245	38.136	-0.457302	0.457302	0.260202	-1.75749	0.0788341	0.125638	0.505084	0.0366942	0.00133928	0.0190167	0	0	FALSE
RS01330	50S_ribosomal_protein_L13	0.288129	11.7775	17.9906	2.22002e-05	0.000157702	12498.9	-0.241875	0.241875	0.0593612	-4.07463	4.60874e-05	0.000128461	0.265002	0.122688	0.438942	0.280815	1	0	FALSE
RS01335	30S_ribosomal_protein_S9	0.314699	11.5756	16.5524	4.73246e-05	0.000315887	10861.7	-0.267259	0.267259	0.0652002	-4.09905	4.14844e-05	0.000116121	0.290979	0.120585	0.381448	0.251017	1	0	FALSE
RS01340	site-specific_integrase	-0.219266	8.13826	7.08349	0.00777975	0.0296679	1004.45	0.262286	-0.262286	0.0771977	3.39759	0.000679822	0.00161315	-0.240776	0.0847778	0.0352749	0.0600263	1	0	FALSE
RS01345	transcriptional_regulator	-0.106368	6.91983	1.08185	0.298285	0.513062	430.267	0.149345	-0.149345	0.100325	1.48862	0.136588	0.202478	-0.127857	0.0720852	0.0151103	0.0435977	0	0	FALSE
RS01350	hypothetical_protein	0.728593	1.78364	2.73658	0.0980744	0.233593	9.81785	-0.431326	0.431326	0.374868	-1.15061	0.249894	0.339202	0.579959	0.0185805	0.000344789	0.00946265	0	0	FALSE
RS01355	hypothetical_protein	0.579968	2.55881	3.67149	0.0553508	0.151228	18.3876	-0.421377	0.421377	0.328241	-1.28374	0.199232	0.27983	0.500672	0.0266556	0.000645746	0.0136507	0	0	FALSE
RS01360	hypothetical_protein	0.0477568	1.61021	0.0146403	0.903693	1	9.09642	0.0141786	-0.0141786	0.372751	0.0380377	0.969658	0.977779	0.0167891	0.0167739	0.000319453	0.00854666	0	0	FALSE
RS01365	hypothetical_protein	-0.0216342	1.6185	0.00308385	0.955714	1	8.79441	0.0167165	-0.0167165	0.375991	0.0444598	0.964538	0.973888	-0.0191754	0.0168602	0.000308847	0.00858453	0	0	FALSE
RS01370	hypothetical_protein	0.33297	2.46788	1.34095	0.246866	0.456402	17.8037	-0.203533	0.203533	0.328789	-0.619039	0.535891	0.632773	0.268252	0.0257084	0.00062524	0.0131668	0	0	FALSE
RS01375	hypothetical_protein	-0.0398006	6.177	0.0784231	0.779446	0.930973	256.402	0.0826948	-0.0826948	0.137457	0.601606	0.547437	0.642572	-0.0612477	0.0643471	0.00900445	0.0366758	0	0	FALSE
RS01380	restriction_endonuclease	0.255051	9.4498	8.73729	0.00311768	0.0135573	2488.87	-0.207521	0.207521	0.0790419	-2.62546	0.00865322	0.0168883	0.231286	0.0984403	0.0874053	0.0929228	1	0	FALSE
RS01385	hypothetical_protein	0.562485	9.85895	55.4243	9.71305e-14	1.91351e-12	3299.81	-0.513466	0.513466	0.0701725	-7.31721	2.53185e-13	1.69848e-12	0.537976	0.102703	0.115884	0.109294	1	0	FALSE
RS01390	ATP-dependent_DNA_helicase_RecG	0.705037	8.57458	74.708	5.45739e-18	1.5807e-16	1351.71	-0.653634	0.653634	0.078186	-8.35999	6.27258e-17	5.64247e-16	0.679335	0.0893231	0.0474702	0.0683967	1	0	FALSE
RS01395	hypothetical_protein	0.154343	0.4018	0.0503313	0.822488	0.960378	2.79831	-0.0315802	0.0315802	0.373143	-0.0846329	0.932553	0.94788	0.0929614	0.00418563	9.82724e-05	0.00214195	0	0	FALSE
RS01400	hypothetical_protein	-0.831043	1.39293	3.70543	0.0542355	0.14899	8.18333	0.567463	-0.567463	0.381525	1.48736	0.136921	0.202819	-0.699253	0.0145104	0.000287387	0.0073989	0	0	FALSE
RS01405	MutR_family_transcriptional_regulator	-0.583219	5.22193	11.8093	0.000589345	0.00302506	132.519	0.596667	-0.596667	0.171812	3.47279	0.000515086	0.00124009	-0.589943	0.0543979	0.00465387	0.0295259	1	0	FALSE
RS01410	MFS_transporter	-0.501561	5.05966	15.6169	7.75601e-05	0.00050321	118.297	0.524038	-0.524038	0.159871	3.27788	0.00104591	0.0024096	-0.5128	0.0527075	0.00415442	0.028431	1	0	FALSE
RS01415	amino_acid_ABC_transporter_permease	-0.698703	10.3534	69.388	8.08788e-17	2.1624e-15	4684.18	0.736162	-0.736162	0.0767158	9.59596	8.31358e-22	9.56545e-21	-0.717433	0.107853	0.164502	0.136178	1	0	FALSE
RS01420	osmoprotectant_ABC_transporter_substrate-binding_protein	-0.69135	10.1319	110.807	6.52185e-26	3.4874e-24	4016.34	0.731917	-0.731917	0.0590915	12.3862	3.10522e-35	7.68155e-34	-0.711634	0.105546	0.141048	0.123297	1	0	FALSE
RS01425	choline_ABC_transporter_permease	-0.604863	9.15227	62.6444	2.47608e-15	5.55236e-14	2035.81	0.643828	-0.643828	0.0722631	8.90951	5.12592e-19	5.33905e-18	-0.624346	0.095341	0.0714945	0.0834178	1	0	FALSE
RS01430	glycine/betaine_ABC_transporter_ATP-binding_protein	-0.720638	10.3165	119.593	7.76777e-28	4.90883e-26	4565.3	0.761683	-0.761683	0.057358	13.2795	3.04606e-40	9.27409e-39	-0.741161	0.107469	0.160327	0.133898	1	0	FALSE
RS01515	hypothetical_protein	-0.0857474	5.83074	0.418904	0.517485	0.732	201.275	0.1266	-0.1266	0.138005	0.917358	0.358955	0.458897	-0.106174	0.0607399	0.00706847	0.0339042	0	0	FALSE
RS01520	hypothetical_protein	0.0803248	7.93204	0.540877	0.462069	0.682169	868.341	-0.0351973	0.0351973	0.0960082	-0.366607	0.713912	0.777563	0.057761	0.0826296	0.0304949	0.0565622	0	0	FALSE
RS01525	hypothetical_protein	0.133903	5.70378	0.812882	0.367269	0.584795	183.955	-0.0845647	0.0845647	0.150099	-0.563391	0.573168	0.66606	0.109234	0.0594173	0.00646024	0.0329388	0	0	FALSE
RS01530	hypothetical_protein	0.124425	6.0367	0.835966	0.360553	0.577056	231.848	-0.0773305	0.0773305	0.136499	-0.566528	0.571035	0.665534	0.100878	0.0628855	0.00814217	0.0355138	0	0	FALSE
RS01535	acetyltransferase	-0.663573	7.86087	37.0617	1.14452e-09	1.49309e-08	832.024	0.695705	-0.695705	0.0989651	7.0298	2.0683e-12	1.26723e-11	-0.679639	0.0818883	0.0292195	0.0555539	1	0	FALSE
RS01540	GNAT_family_N-acetyltransferase	-0.558952	7.70957	22.263	2.37738e-06	1.97412e-05	748.28	0.591397	-0.591397	0.105162	5.62366	1.86955e-08	7.93956e-08	-0.575174	0.0803121	0.0262785	0.0532953	1	0	FALSE
RS01545	acetyltransferase	-0.480967	8.37553	20.3987	6.28716e-06	4.85609e-05	1187.09	0.516657	-0.516657	0.0949994	5.43853	5.37226e-08	2.17863e-07	-0.498812	0.0872495	0.0416888	0.0644692	1	0	FALSE
RS01550	hypothetical_protein	0.00743422	7.02699	0.00476992	0.944938	1	463.113	0.0365345	-0.0365345	0.105407	0.346606	0.728888	0.788234	-0.0145502	0.0732015	0.0162639	0.0447327	0	0	FALSE
RS01555	DNA-directed_RNA_polymerase_sigma-70_factor	-0.106109	5.71196	0.746078	0.387721	0.608008	185.301	0.147358	-0.147358	0.136518	1.0794	0.280408	0.374698	-0.126733	0.0595026	0.00650748	0.033005	0	0	FALSE
RS01560	lipoprotein	-0.251858	2.0379	0.587559	0.443365	0.663379	13.0277	0.226244	-0.226244	0.349756	0.646861	0.517722	0.613966	-0.239051	0.0212292	0.000457515	0.0108434	0	0	FALSE
RS01565	TetR_family_transcriptional_regulator	-0.259768	5.29969	4.30524	0.0379951	0.111848	139.405	0.296334	-0.296334	0.150909	1.96366	0.049569	0.0823652	-0.278051	0.0552079	0.00489569	0.0300518	0	0	FALSE
RS01570	antibiotic_ABC_transporter_permease	-0.479526	5.07397	13.0061	0.000310481	0.00172663	119.641	0.506004	-0.506004	0.162524	3.11341	0.00184938	0.00406207	-0.492765	0.0528566	0.00420161	0.0285291	1	0	FALSE
RS01575	glycosyl_transferase_family_2	-0.854194	4.10629	26.5785	2.53044e-07	2.42862e-06	61.2377	0.827959	-0.827959	0.213825	3.87213	0.00010789	0.000285832	-0.841076	0.042776	0.00215058	0.0224633	1	0	FALSE
RS01580	hypothetical_protein	0.0131474	6.24703	0.0118368	0.913364	1	268.704	0.0297884	-0.0297884	0.124248	0.239749	0.810525	0.85457	-0.0083205	0.0650765	0.00943648	0.0372565	0	0	FALSE
RS01585	PadR_family_transcriptional_regulator	-0.17615	4.11917	1.11424	0.291162	0.504916	60.1195	0.191154	-0.191154	0.215285	0.887911	0.374589	0.474895	-0.183652	0.0429102	0.00211131	0.0225107	0	0	FALSE
RS01590	hypothetical_protein	0.716961	9.01982	63.0495	2.01575e-15	4.60501e-14	1840.18	-0.664012	0.664012	0.0784065	-8.46884	2.47857e-17	2.31372e-16	0.690486	0.0939612	0.0646243	0.0792928	1	0	FALSE
RS01595	N-acetylglucosamine-6-phosphate_deacetylase	0.442358	8.77097	28.0168	1.20267e-07	1.21415e-06	1552.03	-0.393431	0.393431	0.0790123	-4.97936	6.37953e-07	2.26662e-06	0.417894	0.0913689	0.054505	0.072937	1	0	FALSE
RS01600	isoprenylcysteine_carboxyl_methyltransferase	-0.25813	2.18841	0.472884	0.491663	0.711399	14.71	0.226783	-0.226783	0.350328	0.647344	0.517409	0.613966	-0.242456	0.0227971	0.000516595	0.0116568	0	0	FALSE
RS01605	glycine--tRNA_ligase_subunit_alpha	0.670768	9.4651	56.8957	4.59542e-14	9.31722e-13	2509.59	-0.619906	0.619906	0.0817873	-7.57949	3.46918e-14	2.52408e-13	0.645337	0.0985998	0.088133	0.0933664	1	0	FALSE
RS01610	FMN-dependent_NADH-azoreductase	0.741892	8.50114	65.3563	6.251e-16	1.52087e-14	1284.26	-0.689488	0.689488	0.0855999	-8.05478	7.96227e-16	6.37948e-15	0.71569	0.088558	0.0451012	0.0668296	1	0	FALSE
RS01615	glycine--tRNA_ligase_subunit_beta	0.596131	10.4602	65.467	5.90963e-16	1.44504e-14	5006.66	-0.547502	0.547502	0.0681438	-8.03451	9.39548e-16	7.49744e-15	0.571816	0.108966	0.175827	0.142396	1	0	FALSE
RS01620	hypothetical_protein	0.540913	8.55409	41.4346	1.21881e-10	1.79176e-09	1334.15	-0.4911	0.4911	0.0802472	-6.11984	9.36712e-10	4.48851e-09	0.516006	0.0891096	0.0468532	0.0679814	1	0	FALSE
RS01625	membrane_protein	-0.181258	3.87932	1.16945	0.279513	0.490929	50.9527	0.205754	-0.205754	0.224452	0.916693	0.359303	0.459045	-0.193506	0.0404117	0.00178938	0.0211005	0	0	FALSE
RS01630	glycerol_kinase	0.132514	6.28535	1.16519	0.280391	0.491237	275.999	-0.0847275	0.0847275	0.125721	-0.673935	0.500352	0.598307	0.108621	0.0654757	0.0096927	0.0375842	0	0	FALSE
RS01635	alpha-glycerophosphate_oxidase	-0.13212	5.83979	1.3055	0.253211	0.462162	202.53	0.169478	-0.169478	0.130966	1.29406	0.195644	0.275573	-0.150799	0.0608343	0.00711255	0.0339734	0	0	FALSE
RS01640	glycerol_transporter	-0.146937	5.25926	1.27498	0.258835	0.46926	134.989	0.180222	-0.180222	0.155869	1.15624	0.247582	0.336977	-0.163579	0.0547867	0.00474061	0.0297636	0	0	FALSE
RS01645	NADH_peroxidase	0.772815	6.09333	41.945	9.38776e-11	1.39697e-09	239.149	-0.707872	0.707872	0.129061	-5.48477	4.14004e-08	1.6928e-07	0.740343	0.0634754	0.00839858	0.035937	1	0	FALSE
RS01650	hypothetical_protein	1.0171	6.53629	88.5624	4.9256e-21	1.85798e-19	325.386	-0.95142	0.95142	0.114322	-8.32228	8.62871e-17	7.65749e-16	0.984258	0.0680898	0.0114271	0.0397585	1	0	FALSE
RS01655	transketolase	0.178093	10.7572	6.35933	0.0116765	0.0416332	6165.14	-0.131771	0.131771	0.0628089	-2.09797	0.0359081	0.0616324	0.154932	0.11206	0.216511	0.164285	0	0	FALSE
RS01660	bacteriocin_immunity_protein	0.121338	7.48752	1.48917	0.222345	0.420004	637.34	-0.0746328	0.0746328	0.0934168	-0.798922	0.424335	0.526165	0.0979856	0.077999	0.0223824	0.0501907	0	0	FALSE
RS01665	3-dehydroquinate_dehydratase	0.136359	8.92758	3.191	0.0740448	0.187267	1733.16	-0.0906309	0.0906309	0.0694806	-1.30441	0.192096	0.27129	0.113495	0.0930003	0.0608659	0.0769331	0	0	FALSE
RS01670	ABC_transporter_permease	0.236485	10.4318	9.2211	0.00239242	0.0106901	4919.48	-0.190247	0.190247	0.0725597	-2.62193	0.00874327	0.0170304	0.213366	0.10867	0.172765	0.140717	1	0	FALSE
RS01675	PTS_cellobiose_transporter_subunit_IIC	0.16857	9.59201	0.708427	0.399966	0.622198	2747.81	-0.111089	0.111089	0.2506	-0.44329	0.657556	0.735615	0.139829	0.0999218	0.0964989	0.0982104	0	0	FALSE
RS01680	glutamate_5-kinase	-0.159063	9.04031	4.27707	0.0386298	0.113442	1877.91	0.202328	-0.202328	0.0691624	2.9254	0.00344017	0.00725038	-0.180695	0.0941747	0.0659494	0.080062	0	0	FALSE
RS01685	gamma-glutamyl-phosphate_reductase	0.0370454	10.3416	0.299077	0.584462	0.788788	4624.99	0.00768359	-0.00768359	0.0595531	0.129021	0.897341	0.919171	0.0146809	0.10773	0.162423	0.135077	0	0	FALSE
RS01690	16S_rRNA_(cytosine(1402)-N(4))-methyltransferase	0.205524	8.90731	6.57789	0.0103253	0.0377635	1708.12	-0.159376	0.159376	0.071816	-2.21923	0.026471	0.0466096	0.18245	0.0927892	0.0599867	0.076388	1	0	FALSE
RS01695	cell_division_protein_FtsL	0.488281	7.32168	22.1724	2.49231e-06	2.05882e-05	566.171	-0.436223	0.436223	0.0973529	-4.48085	7.43474e-06	2.32438e-05	0.462252	0.0762713	0.0198831	0.0480772	1	0	FALSE
RS01700	penicillin-binding_protein_2X	0.715271	9.90487	116.946	2.95026e-27	1.75073e-25	3402.84	-0.666528	0.666528	0.0591087	-11.2763	1.71806e-29	3.33337e-28	0.6909	0.103181	0.119503	0.111342	1	0	FALSE
RS01705	phospho-N-acetylmuramoyl-pentapeptide-transferase	0.946915	8.95875	173.461	1.29834e-39	1.85815e-37	1762.07	-0.895047	0.895047	0.06741	-13.2777	3.11983e-40	9.35475e-39	0.920981	0.093325	0.0618813	0.0776031	1	0	FALSE
RS01710	DEAD/DEAH_box_helicase	0.229571	9.56401	9.46633	0.00209278	0.00946418	2693.84	-0.182745	0.182745	0.0666867	-2.74036	0.00613723	0.0123431	0.206158	0.0996301	0.0946039	0.097117	1	0	FALSE
RS01715	amino_acid_ABC_transporter_substrate-binding_protein	-0.637443	9.03122	55.4595	9.54053e-14	1.89487e-12	1872.38	0.675479	-0.675479	0.0794165	8.50553	1.80774e-17	1.71173e-16	-0.656461	0.0940799	0.0657553	0.0799176	1	0	FALSE
RS01720	amino_acid_ABC_transporter_permease	-0.369234	9.35899	23.9597	9.83714e-07	8.64034e-06	2346.23	0.410269	-0.410269	0.0710802	5.77192	7.83734e-09	3.42386e-08	-0.389752	0.0974944	0.082396	0.0899452	1	0	FALSE
RS01725	amino_acid_ABC_transporter_ATP-binding_protein	-0.142605	9.74706	3.42434	0.0642421	0.168156	3066.5	0.185946	-0.185946	0.0715044	2.60048	0.00930943	0.0180268	-0.164275	0.101537	0.107691	0.104614	0	0	FALSE
RS01730	membrane_protein	-0.165568	6.26557	2.14085	0.143422	0.307171	273.279	0.206961	-0.206961	0.119254	1.73547	0.0826572	0.131178	-0.186264	0.0652696	0.00959715	0.0374334	0	0	FALSE
RS01735	thioredoxin-disulfide_reductase	0.032508	10.2024	0.108858	0.741448	0.902423	4199.96	0.011422	-0.011422	0.0857048	0.133272	0.893979	0.917156	0.010543	0.10628	0.147497	0.126889	0	0	FALSE
RS01740	nicotinate_phosphoribosyltransferase	0.233149	9.27648	7.67644	0.00559465	0.0223878	2206.76	-0.187058	0.187058	0.075214	-2.48701	0.0128822	0.0242799	0.210103	0.0966349	0.0774984	0.0870666	1	0	FALSE
RS01745	NAD(+)_synthetase	0.387439	9.30354	29.4569	5.71755e-08	6.07459e-07	2246.74	-0.340038	0.340038	0.0669227	-5.08105	3.75353e-07	1.37815e-06	0.363738	0.0969168	0.0789022	0.0879095	1	0	FALSE
RS01750	aminopeptidase_C	0.385538	9.21136	27.957	1.24042e-07	1.24709e-06	2107.33	-0.337709	0.337709	0.0682323	-4.9494	7.44421e-07	2.62137e-06	0.361623	0.0959565	0.0740063	0.0849814	1	0	FALSE
RS01755	penicillin-binding_protein_1A	0.111016	11.1694	2.74923	0.0973013	0.232777	8207.34	-0.0658469	0.0658469	0.0578923	-1.1374	0.25537	0.345675	0.0884313	0.116354	0.28823	0.202292	0	0	FALSE
RS01760	Holliday_junction_resolvase_RecU	0.0392202	8.86542	0.16345	0.686	0.861785	1660.66	0.00594183	-0.00594183	0.0833567	0.071282	0.943173	0.957106	0.0166392	0.0923528	0.0583201	0.0753364	0	0	FALSE
RS01765	hypothetical_protein	0.432411	4.35992	8.09715	0.0044335	0.0184388	70.7191	-0.348105	0.348105	0.201435	-1.72813	0.0839655	0.132722	0.390258	0.0454181	0.00248355	0.0239508	0	0	FALSE
RS01770	cell_cycle_protein_GpsB	-0.267617	9.49791	9.53753	0.00201312	0.00912941	2580.33	0.310497	-0.310497	0.0742751	4.18036	2.91046e-05	8.40648e-05	-0.289057	0.0989415	0.0906174	0.0947795	1	0	FALSE
RS01775	RNA_methyltransferase	0.522946	8.46531	41.088	1.45524e-10	2.12648e-09	1254.01	-0.472964	0.472964	0.0760838	-6.21636	5.08827e-10	2.49868e-09	0.497955	0.0881848	0.044039	0.0661119	1	0	FALSE
RS01780	hypothetical_protein	0.358655	10.4619	31.5368	1.957e-08	2.21459e-07	5018.31	-0.312167	0.312167	0.0563823	-5.53661	3.0838e-08	1.27675e-07	0.335411	0.108984	0.176236	0.14261	1	0	FALSE
RS01785	S-ribosylhomocysteine_lyase	-0.0510903	9.68511	0.467629	0.49408	0.71341	2935.63	0.0952034	-0.0952034	0.0686628	1.38653	0.165584	0.23954	-0.0731468	0.100892	0.103095	0.101993	0	0	FALSE
RS01790	ribonuclease_Y	0.768106	10.232	120.331	5.35322e-28	3.47317e-26	4268.73	-0.718004	0.718004	0.0631423	-11.3712	5.81809e-30	1.14e-28	0.743055	0.106589	0.149911	0.12825	1	0	FALSE
RS01795	multidrug_ABC_transporter_ATP-binding_protein	-0.52312	5.46966	14.5956	0.000133224	0.000818523	157.201	0.544384	-0.544384	0.150114	3.62648	0.000287315	0.000715217	-0.533752	0.0569785	0.00552068	0.0312496	1	0	FALSE
RS01800	ABC_transporter_permease	-0.689235	5.52214	30.4598	3.4086e-08	3.72724e-07	163.933	0.708574	-0.708574	0.143475	4.93865	7.86654e-07	2.76026e-06	-0.698904	0.0575252	0.00575708	0.0316411	1	0	FALSE
RS01805	sensor_histidine_kinase	-0.649878	7.94671	64.1029	1.18088e-15	2.803e-14	882.404	0.688254	-0.688254	0.0784966	8.76795	1.81943e-18	1.83707e-17	-0.669066	0.0827825	0.0309887	0.0568856	1	0	FALSE
RS01810	DNA-binding_response_regulator	-0.558561	7.2734	32.6836	1.08448e-08	1.27465e-07	552.573	0.595342	-0.595342	0.0940335	6.33117	2.4331e-10	1.23149e-09	-0.576951	0.0757684	0.0194055	0.047587	1	0	FALSE
RS01815	DUF1211_domain-containing_membrane_protein	-0.428287	8.02866	27.0834	1.94862e-07	1.91169e-06	932.49	0.468722	-0.468722	0.0792766	5.91249	3.36967e-09	1.52599e-08	-0.448505	0.0836361	0.0327477	0.0581919	1	0	FALSE
RS01820	guanylate_kinase	0.546846	7.94674	44.7689	2.21711e-11	3.51415e-10	874.4	-0.496576	0.496576	0.0801041	-6.19914	5.67739e-10	2.77421e-09	0.521711	0.0827828	0.0307077	0.0567452	1	0	FALSE
RS01825	DNA-directed_RNA_polymerase_subunit_omega	0.853199	8.9	107.308	3.81095e-25	1.97278e-23	1692.53	-0.799972	0.799972	0.075696	-10.5682	4.18349e-26	6.22491e-25	0.826585	0.0927131	0.0594391	0.0760761	1	0	FALSE
RS02840	TlyA_family_rRNA_(cytidine-2-O)-methyltransferase	0.0454706	8.21518	0.339625	0.560046	0.771165	1057.64	-0.000168189	0.000168189	0.0743895	-0.00226092	0.998196	0.998196	0.0228194	0.0855791	0.0371429	0.061361	0	0	FALSE
RS02845	ArgR_family_transcriptional_regulator	0.188131	7.92462	3.69732	0.0545	0.149323	863.184	-0.140624	0.140624	0.0885694	-1.58773	0.112348	0.171292	0.164378	0.0825523	0.0303138	0.056433	0	0	FALSE
RS02850	DNA_repair_protein_RecN	0.212122	9.54688	9.05426	0.00262084	0.0116042	2662.29	-0.165784	0.165784	0.0633227	-2.61808	0.00884264	0.0171902	0.188953	0.0994517	0.0934959	0.0964738	1	0	FALSE
RS02855	hypothetical_protein	0.270415	9.33891	14.3161	0.000154538	0.000935303	2304.05	-0.224004	0.224004	0.0665831	-3.36428	0.000767426	0.00180587	0.247209	0.0972852	0.0809149	0.0891001	1	0	FALSE
RS02860	lipase	0.377561	8.07912	22.0364	2.67524e-06	2.19523e-05	959.746	-0.329225	0.329225	0.0767308	-4.29066	1.78145e-05	5.29353e-05	0.353393	0.0841617	0.0337049	0.0589333	1	0	FALSE
RS02865	membrane_protein	0.588536	7.29752	40.4487	2.01842e-10	2.91443e-09	556.279	-0.535659	0.535659	0.0931706	-5.74923	8.96503e-09	3.8993e-08	0.562097	0.0760197	0.0195357	0.0477777	1	0	FALSE
RS02870	transcriptional_regulator	-0.275944	13.0533	13.3716	0.000255465	0.00147286	30364.8	0.318569	-0.318569	0.0674041	4.72625	2.28704e-06	7.59404e-06	-0.297257	0.135979	1.06637	0.601174	1	0	FALSE
RS02880	dihydroorotate_oxidase	-0.259917	5.26439	4.51336	0.033631	0.101393	135.885	0.292519	-0.292519	0.151384	1.9323	0.0533226	0.0876456	-0.276218	0.0548401	0.00477207	0.0298061	0	0	FALSE
RS02885	peptidoglycan_branched_peptide_synthesis_protein	0.134241	10.5554	4.32466	0.0375639	0.111116	5361.87	-0.0889859	0.0889859	0.0586721	-1.51667	0.129351	0.193782	0.111614	0.109958	0.188301	0.149129	0	0	FALSE
RS02890	UDP-N-acetylmuramoylpentapeptide-lysine_N(6)-alanyltransferase	0.127568	9.88763	3.49799	0.0614433	0.162491	3373.67	-0.0817169	0.0817169	0.0595705	-1.37177	0.170136	0.244162	0.104642	0.103001	0.118478	0.11074	0	0	FALSE
RS02895	UDP-N-acetylmuramoylpentapeptide-lysine_N(6)-alanyltransferase	-0.0435173	10.0177	0.456979	0.499039	0.71759	3696.7	0.088091	-0.088091	0.0583699	1.50918	0.131252	0.196035	-0.0658041	0.104356	0.129823	0.11709	0	0	FALSE
RS02900	sugar-phosphatase	-0.0296419	9.35819	0.142193	0.70611	0.873838	2338.9	0.0741363	-0.0741363	0.0687138	1.07891	0.280626	0.374736	-0.0518891	0.097486	0.0821388	0.0898124	0	0	FALSE
RS02905	phosphohydrolase	0.0669677	8.31627	0.578248	0.447	0.665984	1134.05	-0.0207254	0.0207254	0.0804558	-0.257599	0.796716	0.843607	0.0438465	0.0866322	0.0398263	0.0632293	0	0	FALSE
RS02910	hypothetical_protein	-0.452904	6.56559	11.6543	0.000640558	0.00327411	337.434	0.486974	-0.486974	0.123364	3.94746	7.89854e-05	0.00021501	-0.469939	0.0683951	0.0118502	0.0401226	1	0	FALSE
RS02915	calcium-translocating_P-type_ATPase2C_PMCA-type	-0.50638	10.95	35.4061	2.67653e-09	3.36537e-08	7072.95	0.546516	-0.546516	0.0725132	7.53678	4.81704e-14	3.45395e-13	-0.526448	0.114069	0.248392	0.18123	1	0	FALSE
RS02920	phosphoesterase	-0.349584	7.22126	13.4924	0.000239535	0.00139423	531.796	0.389188	-0.389188	0.0931127	4.17975	2.91827e-05	8.40648e-05	-0.369386	0.0752253	0.0186759	0.0469506	1	0	FALSE
RS02925	fructose-bisphosphatase_class_III	0.31664	6.96885	9.93151	0.00162473	0.00755103	443.442	-0.266863	0.266863	0.101269	-2.63519	0.00840898	0.0164766	0.291751	0.0725959	0.015573	0.0440844	1	0	FALSE
RS02930	epoxyqueuosine_reductase	0.174898	7.55468	2.11794	0.145583	0.310568	668.091	-0.129256	0.129256	0.108372	-1.1927	0.232988	0.319531	0.152077	0.0786986	0.0234624	0.0510805	0	0	FALSE
RS02935	peptide_chain_release_factor_2	-0.0155514	9.02046	0.0467815	0.828761	0.965117	1850.52	0.0603423	-0.0603423	0.0666232	0.905725	0.365082	0.464927	-0.0379469	0.0939679	0.0649876	0.0794778	0	0	FALSE
RS02940	cell_division_ATP-binding_protein_FtsE	0.0842194	8.58716	1.11251	0.291537	0.505387	1369.17	-0.0389782	0.0389782	0.0742635	-0.524863	0.599678	0.689177	0.0615988	0.0894541	0.0480832	0.0687686	0	0	FALSE
RS02945	ABC_transporter_permease	0.145344	9.78648	3.85584	0.0495732	0.1377	3145.73	-0.10016	0.10016	0.0680959	-1.47086	0.141328	0.208567	0.122752	0.101948	0.110473	0.10621	0	0	FALSE
RS02955	IS3_family_transposase	0.00446812	6.73606	0.0018235	0.965939	1	378.37	0.0392966	-0.0392966	0.106696	0.368303	0.712647	0.776832	-0.0174143	0.0701709	0.0132878	0.0417293	0	0	FALSE
RS02960	thioesterase	0.118604	9.03404	2.5167	0.112646	0.255899	1866.72	-0.0734527	0.0734527	0.0702074	-1.04623	0.295457	0.391372	0.0960282	0.0941094	0.0655566	0.079833	0	0	FALSE
RS02965	hypothetical_protein	-0.190829	8.44474	5.8742	0.0153644	0.0525759	1242.43	0.233712	-0.233712	0.0731646	3.19434	0.00140153	0.00313759	-0.212271	0.0879705	0.0436323	0.0658014	0	0	FALSE
RS02970	acetoin_reductase	-0.342338	10.2666	11.0147	0.000903921	0.00448367	4402.21	0.3822	-0.3822	0.0913949	4.18185	2.8915e-05	8.37815e-05	-0.362269	0.106949	0.154599	0.130774	1	0	FALSE
RS02975	bifunctional_DnaQ_family_exonuclease/ATP-dependent_helicase	0.791833	8.00461	93.9575	3.22367e-22	1.41319e-20	908.544	-0.738999	0.738999	0.0788323	-9.37432	6.96235e-21	7.78445e-20	0.765416	0.0833856	0.0319067	0.0576462	1	0	FALSE
RS02980	aspartate_aminotransferase	0.599411	9.07706	55.4302	9.68377e-14	1.91351e-12	1917.26	-0.5491	0.5491	0.0744474	-7.37568	1.63509e-13	1.11198e-12	0.574255	0.0945575	0.0673313	0.0809444	1	0	FALSE
RS02985	asparagine--tRNA_ligase	0.805286	9.77958	78.7039	7.21542e-19	2.30989e-17	3118.93	-0.752071	0.752071	0.0825241	-9.11336	7.98725e-20	8.59063e-19	0.778679	0.101876	0.109532	0.105704	1	0	FALSE
RS02990	membrane_protein	0.834	8.65361	68.5685	1.22546e-16	3.18881e-15	1427.09	-0.778317	0.778317	0.0925948	-8.40562	4.25611e-17	3.89946e-16	0.806158	0.0901463	0.0501172	0.0701317	1	0	FALSE
RS02995	hypothetical_protein	0.80069	9.00769	103.118	3.15794e-24	1.60068e-22	1824.49	-0.748876	0.748876	0.0723836	-10.3459	4.36602e-25	6.26112e-24	0.774783	0.0938348	0.0640735	0.0789541	1	0	FALSE
RS03000	hypothetical_protein	-0.460329	6.37225	20.4201	6.21737e-06	4.81594e-05	295.357	0.495926	-0.495926	0.111543	4.44603	8.74701e-06	2.70897e-05	-0.478127	0.066381	0.0103725	0.0383767	1	0	FALSE
RS03005	RNase_adaptor_protein_RapZ	-0.315951	7.86029	12.5973	0.000386299	0.00207476	828.929	0.357118	-0.357118	0.0832736	4.28848	1.79896e-05	5.33756e-05	-0.336534	0.0818822	0.0291108	0.0554965	1	0	FALSE
RS03010	YvcK_family_protein	-0.0217669	8.16077	0.0784269	0.779441	0.930973	1019.07	0.066245	-0.066245	0.0749842	0.883453	0.376992	0.47733	-0.0440059	0.0850123	0.0357881	0.0604002	0	0	FALSE
RS03015	sporulation_protein	0.0499598	8.25796	0.282493	0.595072	0.795367	1089.41	-0.00427661	0.00427661	0.0844701	-0.0506287	0.959621	0.969914	0.0271182	0.0860248	0.0382586	0.0621417	0	0	FALSE
RS03020	dipeptidase	0.154211	9.33063	4.52485	0.0334061	0.101028	2291.98	-0.107977	0.107977	0.0648763	-1.66435	0.0960431	0.149426	0.131094	0.097199	0.0804909	0.0888449	0	0	FALSE
RS03030	50S_ribosomal_protein_L31_type_B	-0.00788931	12.6744	0.0123983	0.911341	1	23310.8	0.0531448	-0.0531448	0.0594595	0.893798	0.37143	0.471192	-0.0305171	0.132032	0.81864	0.475336	0	0	FALSE
RS03035	oligoribonuclease	-0.419484	8.85088	15.8288	6.93399e-05	0.000452897	1649.19	0.457466	-0.457466	0.0904039	5.06024	4.18731e-07	1.52049e-06	-0.438475	0.0922014	0.0579171	0.0750592	1	0	FALSE
RS03040	adenosine_deaminase	-0.536757	4.52213	13.3543	0.000257837	0.00148478	81.0862	0.546199	-0.546199	0.189271	2.88581	0.00390409	0.00816722	-0.541478	0.0471079	0.00284763	0.0249778	1	0	FALSE
RS03045	flavodoxin	0.303726	8.32616	12.7357	0.000358744	0.00195198	1140.26	-0.255489	0.255489	0.0804699	-3.17497	0.00149852	0.00334336	0.279608	0.0867353	0.0400444	0.0633898	1	0	FALSE
RS03050	chorismate_mutase	-0.00838646	5.65333	0.00283134	0.957564	1	177.364	0.0524801	-0.0524801	0.15336	0.342202	0.732199	0.790519	-0.0304333	0.0588919	0.00622876	0.0325603	0	0	FALSE
RS03055	voltage-gated_chloride_channel_protein	0.136164	8.20937	2.39785	0.121502	0.273338	1052.34	-0.0893349	0.0893349	0.0802018	-1.11388	0.265332	0.357836	0.11275	0.0855186	0.0369566	0.0612376	0	0	FALSE
RS03060	50S_ribosomal_protein_L19	0.303273	11.4337	19.5613	9.74216e-06	7.29658e-05	9847.18	-0.256593	0.256593	0.0601151	-4.26836	1.96916e-05	5.83378e-05	0.279933	0.119107	0.345818	0.232463	1	0	FALSE
RS03070	hypothetical_protein	-0.54637	0.599137	0.659386	0.416777	0.639438	3.71924	0.231812	-0.231812	0.380273	0.609594	0.542131	0.638617	-0.389091	0.00624133	0.000130614	0.00318597	0	0	FALSE
RS03075	transposase	0.396652	5.99025	6.86504	0.00878982	0.0330025	223.161	-0.339837	0.339837	0.146268	-2.32339	0.0201582	0.0363324	0.368245	0.0624016	0.00783709	0.0351194	1	0	FALSE
RS03090	ABC_transporter_permease	0.910791	6.60933	65.3445	6.28847e-16	1.52237e-14	343.176	-0.846267	0.846267	0.115439	-7.33084	2.28716e-13	1.5501e-12	0.878529	0.0688507	0.0120518	0.0404513	1	0	FALSE
RS03095	ABC_transporter_ATP-binding_protein	0.844589	6.10516	47.5219	5.43922e-12	9.31946e-11	240.827	-0.777415	0.777415	0.129668	-5.99544	2.02937e-09	9.40543e-09	0.811002	0.0635986	0.00845749	0.036028	1	0	FALSE
RS03100	peptide_ABC_transporter_permease	0.719933	7.12461	62.3876	2.82092e-15	6.26785e-14	492.498	-0.665031	0.665031	0.0948084	-7.01448	2.30813e-12	1.40547e-11	0.692482	0.0742185	0.0172958	0.0457571	1	0	FALSE
RS03105	DNA-binding_response_regulator	0.132817	5.07733	0.889525	0.345606	0.562392	118.085	-0.0866947	0.0866947	0.165923	-0.522501	0.601322	0.689864	0.109756	0.0528915	0.00414696	0.0285192	0	0	FALSE
RS03110	two-component_sensor_histidine_kinase	0.372565	6.57282	13.4033	0.000251179	0.00145332	336.095	-0.321555	0.321555	0.107676	-2.98631	0.00282368	0.00604114	0.34706	0.0684703	0.0118032	0.0401367	1	0	FALSE
RS03125	rod_shape-determining_protein_RodA	-0.0180153	9.48188	0.0555264	0.813712	0.955388	2548.55	0.0632303	-0.0632303	0.0688017	0.919023	0.358083	0.458374	-0.0406228	0.0987746	0.0895013	0.094138	0	0	FALSE
RS03130	hydrolase	-0.0474047	8.01676	0.234557	0.628165	0.825453	921.823	0.0913587	-0.0913587	0.0876744	1.04202	0.297402	0.393158	-0.0693817	0.0835122	0.0323731	0.0579426	0	0	FALSE
RS03135	DNA_gyrase_subunit_B	0.190072	10.0576	8.43797	0.00367467	0.0157287	3794.9	-0.144314	0.144314	0.0579026	-2.49236	0.0126897	0.0239398	0.167193	0.104772	0.133271	0.119022	1	0	FALSE
RS03140	septation_ring_formation_regulator_EzrA	0.289484	10.7345	17.2196	3.32975e-05	0.000227884	6063.98	-0.242392	0.242392	0.0604802	-4.00779	6.12893e-05	0.00016893	0.265938	0.111823	0.212958	0.162391	1	0	FALSE
RS03145	phosphoserine_phosphatase_SerB	0.0180538	6.07949	0.0202857	0.886742	0.994213	238.984	0.0261107	-0.0261107	0.130096	0.200703	0.840931	0.877744	-0.00402845	0.0633312	0.00839278	0.035862	0	0	FALSE
RS03150	NUDIX_hydrolase	-0.498483	6.29994	17.3604	3.09203e-05	0.000213719	280.668	0.530618	-0.530618	0.12125	4.37622	1.20755e-05	3.67087e-05	-0.51455	0.0656277	0.00985666	0.0377422	1	0	FALSE
RS03155	hypothetical_protein	-0.753515	6.08061	24.7749	6.4432e-07	5.87128e-06	241.823	0.772178	-0.772178	0.14303	5.39873	6.71155e-08	2.67785e-07	-0.762846	0.0633429	0.00849248	0.0359177	1	0	FALSE
RS03160	enolase	0.147215	14.0794	4.68077	0.0305021	0.0937015	61680.7	-0.10129	0.10129	0.0563725	-1.79679	0.0723691	0.116155	0.124252	0.146668	2.16613	1.1564	0	0	FALSE
RS03165	endonuclease	0.368742	4.95764	7.2851	0.00695289	0.0270017	108.024	-0.307339	0.307339	0.170472	-1.80287	0.0714083	0.114799	0.338041	0.0516447	0.00379366	0.0277192	0	0	FALSE
RS03170	3-phosphoshikimate_1-carboxyvinyltransferase	-0.39547	8.35328	22.9577	1.65605e-06	1.39902e-05	1167.74	0.435991	-0.435991	0.0777414	5.60822	2.04413e-08	8.64388e-08	-0.415731	0.0870177	0.0410094	0.0640136	1	0	FALSE
RS03175	shikimate_kinase	-0.0691352	7.18324	0.471738	0.492189	0.711843	516.86	0.112305	-0.112305	0.0966899	1.1615	0.24544	0.334522	-0.0907201	0.0748292	0.0181514	0.0464903	0	0	FALSE
RS03180	LytR_family_transcriptional_regulator	-0.0497507	9.2469	0.427015	0.513457	0.728591	2166.42	0.0935842	-0.0935842	0.0717603	1.30412	0.192192	0.27129	-0.0716675	0.0963267	0.0760815	0.0862041	0	0	FALSE
RS03185	RNA_methyltransferase	0.411428	7.13795	14.8522	0.000116275	0.000719842	498.506	-0.36046	0.36046	0.103535	-3.48152	0.000498579	0.00120181	0.385944	0.0743574	0.0175068	0.0459321	1	0	FALSE
RS03190	hypothetical_protein	0.74015	5.77857	26.7466	2.31963e-07	2.244e-06	191.653	-0.671284	0.671284	0.147584	-4.54849	5.4032e-06	1.71361e-05	0.705717	0.0601965	0.00673058	0.0334635	1	0	FALSE
RS03195	acid_phosphatase/phosphotransferase	0.32618	7.8572	13.4681	0.000242648	0.00140898	822.973	-0.278049	0.278049	0.0846621	-3.28422	0.00102266	0.00236431	0.302114	0.08185	0.0289016	0.0553758	1	0	FALSE
RS03200	ClbS/DfsB_family_four-helix_bundle_protein	0.595666	7.75558	36.3295	1.66621e-09	2.12803e-08	765.021	-0.54213	0.54213	0.0921282	-5.88452	3.99206e-09	1.79552e-08	0.568898	0.0807914	0.0268664	0.0538289	1	0	FALSE
RS03215	cell_wall_surface_anchor_protein	1.17908	1.66039	5.12207	0.0236234	0.0750336	8.65001	-0.654187	0.654187	0.383434	-1.70612	0.0879849	0.138522	0.916633	0.0172966	0.000303776	0.00880021	0	0	FALSE
RS03220	IS3_family_transposase	0.776656	7.13108	66.0873	4.31377e-16	1.06552e-14	494.377	-0.720069	0.720069	0.0960419	-7.49744	6.50754e-14	4.56681e-13	0.748362	0.0742859	0.0173618	0.0458238	1	0	FALSE
RS03230	molecular_chaperone_Hsp33	0.99073	5.25519	54.2146	1.79747e-13	3.47082e-12	131.692	-0.906386	0.906386	0.161744	-5.60383	2.09671e-08	8.8285e-08	0.948558	0.0547444	0.00462484	0.0296846	1	0	FALSE
RS03235	YSIRK-targeted_surface_antigen_transcriptional_regulator	0.441246	8.2105	18.0843	2.11338e-05	0.000151231	1051.04	-0.389331	0.389331	0.093844	-4.1487	3.34368e-05	9.52107e-05	0.415288	0.0855303	0.0369109	0.0612206	1	0	FALSE
RS03240	cell_wall_surface_anchor_protein	0.107301	6.82744	0.887522	0.34615	0.562392	402.931	-0.0609153	0.0609153	0.108738	-0.560203	0.575341	0.666874	0.0841081	0.0711228	0.0141503	0.0426366	0	0	FALSE
RS03245	hypothetical_protein	-0.0714437	3.67961	0.0986899	0.753408	0.910011	43.8007	0.0972167	-0.0972167	0.251498	0.386551	0.699089	0.766905	-0.0843302	0.0383312	0.00153822	0.0199347	0	0	FALSE
RS03250	class_C_sortase	-0.0925768	3.9497	0.20767	0.6486	0.838048	53.2496	0.118427	-0.118427	0.232285	0.509834	0.610168	0.697586	-0.105502	0.0411448	0.00187005	0.0215074	0	0	FALSE
RS03255	class_C_sortase	0.244832	3.50426	1.18285	0.276776	0.490383	38.1012	-0.171965	0.171965	0.260028	-0.661334	0.508398	0.605367	0.208398	0.0365045	0.00133806	0.0189213	0	0	FALSE
RS03260	cell_wall_surface_anchor_protein	-0.255942	6.30188	3.97883	0.0460756	0.1302	280.424	0.293953	-0.293953	0.12496	2.35238	0.0186537	0.0338988	-0.274948	0.0656479	0.0098481	0.037748	0	0	FALSE
RS03265	class_C_sortase	0.122349	4.79061	0.771604	0.379721	0.597776	96.5517	-0.0725224	0.0725224	0.178099	-0.407202	0.68386	0.755222	0.0974357	0.0499047	0.00339075	0.0266477	0	0	FALSE
RS03270	hypothetical_protein	-0.179672	0.412268	0.0711502	0.789669	0.937838	2.97522	0.0979306	-0.0979306	0.374435	0.261542	0.793674	0.840836	-0.138801	0.00429467	0.000104485	0.00219958	0	0	FALSE
RS03275	hypothetical_protein	1.4076	0.0712595	1.80636	0.178946	0.362661	1.61294	-0.296366	0.296366	0.313455	-0.945482	0.344413	NA	0.851985	0.000742324	5.66441e-05	0.000399484	0	0	FALSE
RS03285	hypothetical_protein	-2.0427	0.234433	7.16822	0.00742062	0.0285897	2.99803	0.737627	-0.737627	0.367544	2.00691	0.0447597	0.0751948	-1.39016	0.00244213	0.000105286	0.00127371	0	1	FALSE
RS03290	serine_hydrolase	-0.392065	9.65543	26.9273	2.11258e-07	2.0615e-06	2880.97	0.434545	-0.434545	0.0660438	6.57965	4.71553e-11	2.53588e-10	-0.413305	0.100582	0.101176	0.100879	1	0	FALSE
RS03295	ABC_transporter_ATPase	0.757777	4.84369	28.8477	7.82988e-08	8.08921e-07	98.8089	-0.671849	0.671849	0.178608	-3.76158	0.000168842	0.000436211	0.714813	0.0504576	0.00347003	0.0269638	1	0	FALSE
RS03300	antibiotic_ABC_transporter_permease	0.764795	4.7419	28.9581	7.39621e-08	7.67377e-07	91.9469	-0.673205	0.673205	0.185727	-3.62471	0.000289289	0.000718322	0.719	0.0493973	0.00322904	0.0263132	1	0	FALSE
RS03305	multidrug_ABC_transporter_permease	0.659444	5.19836	25.4606	4.51507e-07	4.19281e-06	127.399	-0.589978	0.589978	0.160766	-3.66979	0.000242747	0.000613532	0.624711	0.0541524	0.00447407	0.0293132	1	0	FALSE
RS03310	hypothetical_protein	-0.0520332	2.93464	0.0408297	0.839867	0.972534	25.434	0.0875069	-0.0875069	0.295093	0.296541	0.766817	0.817635	-0.0697701	0.0305708	0.000893205	0.015732	0	0	FALSE
RS03315	hypothetical_protein	-0.159101	3.83685	0.798905	0.371421	0.589861	49.4313	0.184427	-0.184427	0.230673	0.799517	0.423991	0.526067	-0.171764	0.0399692	0.00173596	0.0208526	0	0	FALSE
RS03320	SDR_family_oxidoreductase	-0.370138	3.92647	4.44875	0.0349269	0.104459	52.8941	0.372674	-0.372674	0.225809	1.65039	0.0988627	0.15321	-0.371406	0.0409028	0.00185756	0.0213802	0	0	FALSE
RS03325	acyl_carrier_protein	-0.160322	2.91299	0.455053	0.499945	0.718655	25.4228	0.184263	-0.184263	0.291103	0.632983	0.526745	0.623089	-0.172293	0.0303452	0.000892812	0.015619	0	0	FALSE
RS03330	beta-hydroxyacyl-ACP_dehydratase	-0.137517	3.8543	0.442221	0.506052	0.724037	49.8772	0.158943	-0.158943	0.239188	0.664511	0.506363	0.60361	-0.14823	0.040151	0.00175161	0.0209513	0	0	FALSE
RS03335	ABC_transporter_ATP-binding_protein	0.140224	4.66218	0.576816	0.447563	0.666162	87.7107	-0.0923669	0.0923669	0.197667	-0.467286	0.640295	0.719969	0.116295	0.0485669	0.00308027	0.0258236	0	0	FALSE
RS03340	ABC_transporter_permease	0.279677	4.88405	3.77506	0.0520221	0.143422	102.803	-0.21815	0.21815	0.175519	-1.24289	0.213909	0.297907	0.248913	0.0508781	0.00361028	0.0272442	0	0	FALSE
RS03345	hypothetical_protein	0.0703703	6.36809	0.342577	0.558346	0.771165	292.265	-0.0249377	0.0249377	0.12042	-0.20709	0.83594	0.872995	0.047654	0.0663376	0.0102639	0.0383008	0	0	FALSE
RS03350	hypothetical_protein	0.193625	5.33874	2.1891	0.13899	0.300991	141.85	-0.142582	0.142582	0.152158	-0.937065	0.348725	0.448135	0.168103	0.0556147	0.00498155	0.0302981	0	0	FALSE
RS03355	hypothetical_protein	0.0992699	6.63776	0.739621	0.389782	0.610651	352.929	-0.0531236	0.0531236	0.112708	-0.47134	0.637398	0.717935	0.0761968	0.0691469	0.0123943	0.0407706	0	0	FALSE
RS03360	hypothetical_protein	-0.150127	6.32312	1.58851	0.207539	0.398219	284.343	0.191471	-0.191471	0.119897	1.59696	0.110274	0.168389	-0.170799	0.0658692	0.00998571	0.0379274	0	0	FALSE
RS03365	hypothetical_protein	-0.0163018	6.06163	0.0207132	0.885563	0.993808	236.272	0.059574	-0.059574	0.123696	0.481614	0.63008	0.71253	-0.0379379	0.0631452	0.00829754	0.0357213	0	0	FALSE
RS03390	hypothetical_protein	0.987454	5.03761	49.7084	1.78381e-12	3.17949e-11	112.888	-0.899226	0.899226	0.17306	-5.19605	2.03569e-07	7.67359e-07	0.94334	0.0524777	0.00396446	0.0282211	1	0	FALSE
RS03400	peptidase_M13	-0.879916	1.60314	5.18293	0.0228098	0.0729849	9.66483	0.625706	-0.625706	0.371629	1.68369	0.0922422	0.14442	-0.752811	0.0167002	0.000339415	0.00851982	0	0	FALSE
RS03405	alpha/beta_hydrolase	-0.942628	2.02314	8.27412	0.00402141	0.0169715	13.4615	0.730559	-0.730559	0.348015	2.09922	0.0357978	0.0615499	-0.836593	0.0210755	0.000472749	0.0107741	0	0	FALSE
RS03420	alpha/beta_hydrolase	-0.469634	2.36309	2.67026	0.102239	0.238846	16.7377	0.391554	-0.391554	0.330253	1.18562	0.235772	0.322233	-0.430594	0.0246167	0.000587805	0.0126023	0	0	FALSE
RS03425	ABC_transporter_permease	-0.61998	2.72603	6.09352	0.0135678	0.047429	22.2544	0.536705	-0.536705	0.303272	1.76972	0.0767742	0.122533	-0.578343	0.0283976	0.000781543	0.0145896	0	0	FALSE
RS03430	permease	-0.739903	3.10485	10.4496	0.00122678	0.00588008	30.0864	0.688372	-0.688372	0.279813	2.46012	0.0138892	0.0260044	-0.714137	0.0323439	0.00105659	0.0167002	1	0	FALSE
RS03440	hypothetical_protein	-0.879834	1.59747	5.18199	0.0228222	0.0729849	9.38667	0.589919	-0.589919	0.372151	1.58516	0.11293	0.172046	-0.734876	0.0166411	0.000329646	0.0084854	0	0	FALSE
RS03445	multidrug_ABC_transporter_ATP-binding_protein	-0.718594	2.89183	6.68806	0.00970606	0.0358886	25.3867	0.624977	-0.624977	0.301094	2.07568	0.0379231	0.0648099	-0.671785	0.0301247	0.000891542	0.0155081	0	0	FALSE
RS03450	hypothetical_protein	-0.389109	8.13766	24.2762	8.34622e-07	7.43823e-06	1005.49	0.429942	-0.429942	0.0766209	5.61128	2.00833e-08	8.51068e-08	-0.409525	0.0847716	0.0353113	0.0600415	1	0	FALSE
RS03455	DNA-entry_nuclease	0.146459	4.95617	0.985554	0.320831	0.540281	108.149	-0.103846	0.103846	0.175021	-0.593333	0.552958	0.648188	0.125152	0.0516294	0.00379803	0.0277137	0	0	FALSE
RS03460	cytochrome_o_ubiquinol_oxidase	-0.122345	8.61168	2.35211	0.125113	0.279523	1394.71	0.165266	-0.165266	0.0760175	2.17405	0.0297013	0.051742	-0.143806	0.0897096	0.0489801	0.0693448	0	0	FALSE
RS03465	ABC_transporter_ATP-binding_protein	-0.580124	8.42688	15.28	9.26906e-05	0.000588815	1230.45	0.611773	-0.611773	0.121746	5.02498	5.03487e-07	1.80508e-06	-0.595949	0.0877845	0.0432115	0.065498	1	0	FALSE
RS03470	iron_export_ABC_transporter_permease_subunit_FetB	-0.48364	9.86419	13.0755	0.000299183	0.00168127	3332.44	0.51931	-0.51931	0.11081	4.68648	2.77949e-06	9.15243e-06	-0.501475	0.102757	0.11703	0.109894	1	0	FALSE
RS03475	phosphate_ABC_transporter_ATPase	-0.4409	5.68393	12.2642	0.000461722	0.00243154	182.583	0.470208	-0.470208	0.138877	3.38578	0.000709759	0.00167216	-0.455554	0.0592106	0.00641206	0.0328113	1	0	FALSE
RS03480	LysR_family_transcriptional_regulator	0.0459095	7.69386	0.239355	0.624672	0.822195	736.259	-0.00118634	0.00118634	0.0879045	-0.0134957	0.989232	0.992744	0.0235479	0.0801484	0.0258563	0.0530024	0	0	FALSE
RS03485	membrane_protein	0.00853994	4.77752	0.00379041	0.950908	1	95.8129	0.0322308	-0.0322308	0.177346	0.18174	0.855787	0.88903	-0.0118454	0.0497684	0.00336481	0.0265666	0	0	FALSE
RS03490	lactate_dehydrogenase	-0.152055	5.1051	1.4167	0.233947	0.437167	121.35	0.19123	-0.19123	0.159243	1.20087	0.229802	0.316058	-0.171642	0.0531808	0.00426163	0.0287212	0	0	FALSE
RS03495	glucuronide_permease	-0.826573	1.44133	4.00064	0.045483	0.128717	8.4146	0.564447	-0.564447	0.377441	1.49546	0.134795	0.200873	-0.69551	0.0150146	0.000295509	0.00765507	0	0	FALSE
RS03500	2-dehydro-3-deoxygluconokinase	-0.169906	3.44601	0.673417	0.411863	0.634618	37.1785	0.185246	-0.185246	0.25808	0.717788	0.472888	0.573268	-0.177576	0.0358978	0.00130565	0.0186017	0	0	FALSE
RS03505	beta-glucuronidase	-0.371675	5.26529	6.38133	0.0115327	0.0412331	136.414	0.397155	-0.397155	0.162357	2.44618	0.0144378	0.0269551	-0.384415	0.0548495	0.00479067	0.0298201	1	0	FALSE
RS03510	GntR_family_transcriptional_regulator	-0.575719	8.56295	38.2491	6.22663e-10	8.34677e-09	1352.28	0.614376	-0.614376	0.0822829	7.46663	8.22775e-14	5.71323e-13	-0.595047	0.0892019	0.04749	0.068346	1	0	FALSE
RS03515	2-dehydro-3-deoxyphosphooctonate_aldolase	-0.086026	2.94369	0.104715	0.746243	0.905993	25.6703	0.106929	-0.106929	0.297236	0.359745	0.719038	0.780568	-0.0964776	0.030665	0.000901502	0.0157832	0	0	FALSE
RS03520	uronate_isomerase	-0.369623	4.09742	2.64219	0.10406	0.241813	59.6162	0.373807	-0.373807	0.232272	1.60935	0.10754	0.164851	-0.371715	0.0426836	0.00209363	0.0223886	0	0	FALSE
RS03525	mannonate_dehydratase	-0.327058	3.59929	2.29467	0.129819	0.285483	42.3754	0.349749	-0.349749	0.253549	1.37941	0.167767	0.241991	-0.338404	0.0374945	0.00148816	0.0194913	0	0	FALSE
RS03530	dioxygenase	-0.159744	3.83025	0.755391	0.384775	0.604557	49.3525	0.200353	-0.200353	0.23268	0.86107	0.3892	0.489032	-0.180049	0.0399004	0.00173319	0.0208168	0	0	FALSE
RS03535	haloacid_dehalogenase	-0.0350387	3.61456	0.0321319	0.857738	0.976089	41.9921	0.0845338	-0.0845338	0.246489	0.342951	0.731635	0.790341	-0.0597863	0.0376536	0.0014747	0.0195641	0	0	FALSE
RS03540	beta-hexosamidase	-0.129602	5.19466	0.948867	0.330008	0.550888	128.786	0.163509	-0.163509	0.158745	1.03001	0.303005	0.398668	-0.146556	0.0541138	0.00452277	0.0293183	0	0	FALSE
RS03545	dipeptidase	-0.813473	9.63675	87.8524	7.05251e-21	2.61966e-19	2851.83	0.849699	-0.849699	0.078909	10.7681	4.86974e-27	7.70977e-26	-0.831586	0.100388	0.100152	0.10027	1	0	FALSE
RS03550	catabolite_control_protein_A	0.503672	9.65303	31.4804	2.01467e-08	2.27456e-07	2861.14	-0.453083	0.453083	0.0807998	-5.60748	2.05298e-08	8.66281e-08	0.478378	0.100557	0.100479	0.100518	1	0	FALSE
RS03555	alpha-amylase	-0.136005	7.98316	2.32793	0.127071	0.281185	901.691	0.178824	-0.178824	0.0832035	2.14924	0.0316155	0.0546915	-0.157415	0.0831622	0.0316661	0.0574141	0	0	FALSE
RS03560	glycosyl_transferase_family_1	-0.0983577	9.2362	1.94115	0.163544	0.337778	2150.6	0.142416	-0.142416	0.065922	2.16037	0.0307437	0.0532765	-0.120387	0.0962153	0.075526	0.0858707	0	0	FALSE
RS03565	12C2-diacylglycerol_3-glucosyltransferase	0.0237383	9.90247	0.117818	0.731413	0.896714	3410.85	0.0210827	-0.0210827	0.0606247	0.347757	0.728022	0.788234	0.00132779	0.103156	0.119784	0.11147	0	0	FALSE
RS03570	threonine--tRNA_ligase	0.183128	10.2523	7.60438	0.00582266	0.0231479	4343.65	-0.137094	0.137094	0.0587724	-2.33263	0.0196676	0.0355453	0.160111	0.1068	0.152543	0.129672	1	0	FALSE
RS03575	DNA-binding_response_regulator	0.375504	3.42138	2.57195	0.108773	0.250019	35.7041	-0.285347	0.285347	0.267416	-1.06705	0.285947	0.380558	0.330426	0.0356411	0.00125388	0.0184475	0	0	FALSE
RS03580	hypothetical_protein	-0.73493	7.43282	61.9859	3.45922e-15	7.54487e-14	618.378	0.768887	-0.768887	0.0924899	8.3132	9.31539e-17	8.22998e-16	-0.751909	0.0774292	0.0217165	0.0495728	1	0	FALSE
RS03585	peptidase	-0.280965	10.6313	13.6579	0.000219314	0.00128887	5664.81	0.323317	-0.323317	0.0670813	4.81977	1.43721e-06	4.89541e-06	-0.302141	0.110749	0.19894	0.154844	1	0	FALSE
RS03590	glutamine_ABC_transporter_permease	-0.251456	9.84726	8.36147	0.00383261	0.016302	3289.17	0.293285	-0.293285	0.0787504	3.72424	0.000195908	0.00050026	-0.27237	0.102581	0.115511	0.109046	1	0	FALSE
RS03595	glutamine_ABC_transporter_permease	-0.373372	9.17939	19.3163	1.10757e-05	8.21563e-05	2071.1	0.413911	-0.413911	0.0774289	5.34569	9.00741e-08	3.54387e-07	-0.393641	0.0956235	0.0727339	0.0841787	1	0	FALSE
RS03600	amino_acid_ABC_transporter_substrate-binding_protein	-0.441993	9.35099	26.5797	2.52892e-07	2.42862e-06	2333.47	0.482233	-0.482233	0.0747208	6.4538	1.09081e-10	5.69581e-10	-0.462113	0.0974111	0.081948	0.0896796	1	0	FALSE
RS03605	arginine_ABC_transporter_ATP-binding_protein	-0.500402	9.25399	37.4773	9.24811e-10	1.21625e-08	2182.6	0.540469	-0.540469	0.072086	7.49755	6.50211e-14	4.56681e-13	-0.520435	0.0964006	0.0766496	0.0865251	1	0	FALSE
RS03610	DNA-binding_response_regulator	-0.261707	8.18484	9.79088	0.0017538	0.00808908	1037.95	0.303946	-0.303946	0.0776666	3.91347	9.09785e-05	0.000244961	-0.282826	0.0852631	0.0364512	0.0608572	1	0	FALSE
RS03615	cell_wall_metabolism_sensor_histidine_kinase_VicK	-0.110232	9.11214	2.32239	0.127524	0.281687	1973.05	0.154391	-0.154391	0.0650802	2.37232	0.0176768	0.0322798	-0.132312	0.0949229	0.0692906	0.0821067	0	0	FALSE
RS03620	metallo-hydrolase	0.0464874	8.5795	0.408403	0.522781	0.736922	1362.16	-0.00157712	0.00157712	0.0701144	-0.0224935	0.982054	0.987042	0.0240323	0.0893743	0.0478369	0.0686056	0	0	FALSE
RS03625	hypothetical_protein	0.190428	8.14406	4.2139	0.040094	0.117035	1006	-0.143983	0.143983	0.0874732	-1.64603	0.0997581	0.154356	0.167206	0.0848383	0.0353291	0.0600837	0	0	FALSE
RS03630	ribonuclease_3	-0.0983779	8.27347	1.12592	0.288648	0.50145	1102.16	0.142772	-0.142772	0.0828666	1.72292	0.0849038	0.134098	-0.120575	0.0861863	0.0387062	0.0624463	0	0	FALSE
RS03635	chromosome_segregation_protein_SMC	0.488232	10.1394	46.9174	7.40434e-12	1.25538e-10	4008.47	-0.439846	0.439846	0.0616314	-7.13672	9.55864e-13	6.02438e-12	0.464039	0.105624	0.140772	0.123198	1	0	FALSE
RS03640	haloacid_dehalogenase	-0.137966	7.74675	2.29448	0.129834	0.285483	765.169	0.181119	-0.181119	0.0874498	2.07112	0.0383476	0.0653097	-0.159543	0.0806994	0.0268716	0.0537855	0	0	FALSE
RS03645	haloacid_dehalogenase	0.0628499	8.13033	0.542596	0.461359	0.68136	997.333	-0.0178444	0.0178444	0.0826321	-0.21595	0.829027	0.867607	0.0403472	0.0846952	0.0350249	0.05986	0	0	FALSE
RS03650	signal_recognition_particle-docking_protein_FtsY	0.0296005	9.12278	0.163938	0.685557	0.861549	1986.32	0.0152684	-0.0152684	0.0691105	0.220927	0.82515	0.864879	0.00716606	0.0950338	0.0697568	0.0823953	0	0	FALSE
RS03655	group_II_intron_reverse_transcriptase/maturase	-0.478153	5.88842	15.5872	7.87866e-05	0.000510487	210.729	0.506005	-0.506005	0.132141	3.82929	0.000128514	0.000338204	-0.492079	0.0613408	0.00740048	0.0343706	1	0	FALSE
RS03660	phosphate_ABC_transporter_substrate-binding_protein	-0.653541	10.1648	90.4829	1.86587e-21	7.32204e-20	4107.69	0.694846	-0.694846	0.0600159	11.5777	5.34537e-31	1.11352e-29	-0.674194	0.105888	0.144256	0.125072	1	0	FALSE
RS03675	N52CN10-methylene_tetrahydromethanopterin_reductase	0.145006	5.13622	0.919705	0.337552	0.560782	123.393	-0.0901877	0.0901877	0.168244	-0.536054	0.591922	0.682641	0.117597	0.053505	0.00433337	0.0289192	0	0	FALSE
RS03680	S1_RNA-binding_protein	0.470592	9.13452	33.786	6.15194e-09	7.42812e-08	1996.39	-0.421147	0.421147	0.0724919	-5.80957	6.26321e-09	2.76672e-08	0.44587	0.095156	0.0701102	0.0826331	1	0	FALSE
RS03685	SprT_family_protein	0.45221	7.13882	23.258	1.41662e-06	1.20935e-05	498.742	-0.401277	0.401277	0.0964154	-4.16196	3.15528e-05	9.03662e-05	0.426743	0.0743665	0.0175151	0.0459408	1	0	FALSE
RS03690	phage_shock_protein_C	-0.847491	10.8599	127.617	1.36137e-29	1.0037e-27	6658.5	0.886486	-0.886486	0.0664396	13.3427	1.30563e-40	4.03727e-39	-0.866988	0.113129	0.233837	0.173483	1	0	FALSE
RS03695	HPr_kinase/phosphorylase	-0.0342463	9.87815	0.278717	0.597544	0.796397	3355.31	0.0787331	-0.0787331	0.0581319	1.35439	0.175613	0.250846	-0.0564897	0.102903	0.117834	0.110368	0	0	FALSE
RS03700	prolipoprotein_diacylglyceryl_transferase	0.0892262	9.52009	1.62491	0.202409	0.390687	2615.84	-0.0439251	0.0439251	0.0654175	-0.671457	0.501929	0.599468	0.0665756	0.0991726	0.0918645	0.0955185	0	0	FALSE
RS03705	DUF948_domain_containing_protein	0.0206689	9.1319	0.0854494	0.770044	0.923825	1999.06	0.0240916	-0.0240916	0.0661556	0.364166	0.715734	0.77869	-0.00171137	0.0951288	0.0702039	0.0826663	0	0	FALSE
RS03710	hypothetical_protein	-0.236441	10.348	7.71083	0.00548906	0.0220378	4654.93	0.278184	-0.278184	0.0780153	3.56576	0.000362798	0.000889687	-0.257313	0.107797	0.163474	0.135636	1	0	FALSE
RS03715	hypothetical_protein	0.480553	11.0597	38.3768	5.8322e-10	7.86135e-09	7591.48	-0.432194	0.432194	0.0692996	-6.23659	4.47204e-10	2.21809e-09	0.456373	0.115211	0.266602	0.190907	1	0	FALSE
RS03720	peptidase_U32	0.485125	6.3907	9.81658	0.00172946	0.00798439	295.286	-0.423149	0.423149	0.140298	-3.01607	0.00256073	0.00552637	0.454137	0.0665732	0.01037	0.0384716	1	0	FALSE
RS03725	collagenase-like_protease	0.582863	7.56896	12.7764	0.000351017	0.00191485	671.581	-0.518257	0.518257	0.13364	-3.878	0.000105317	0.000280305	0.55056	0.0788474	0.0235849	0.0512162	1	0	FALSE
RS03730	hypothetical_protein	-0.246024	7.4241	4.70314	0.0301076	0.0926653	611.814	0.28686	-0.28686	0.102406	2.8012	0.00509123	0.0104302	-0.266442	0.0773383	0.021486	0.0494122	0	0	FALSE
RS03735	hypothetical_protein	-0.55516	6.12348	24.7171	6.63915e-07	6.0106e-06	248.716	0.584855	-0.584855	0.122371	4.77936	1.75853e-06	5.92868e-06	-0.570007	0.0637894	0.00873453	0.036262	1	0	FALSE
RS03740	manganese_transporter	-0.357997	9.29224	16.9367	3.86478e-05	0.000260832	2239.65	0.398695	-0.398695	0.079713	5.00163	5.68484e-07	2.02708e-06	-0.378346	0.0967991	0.0786533	0.0877262	1	0	FALSE
RS03745	bifunctional_diaminohydroxyphosphoribosylaminopyrimidine_deaminase/5-amino-6-(5-phosphoribosylamino)uracil_reductase	-0.777047	6.57242	16.7991	4.15524e-05	0.000278888	340.97	0.785318	-0.785318	0.155481	5.05091	4.39721e-07	1.58797e-06	-0.781183	0.0684662	0.0119744	0.0402203	1	0	FALSE
RS03750	riboflavin_synthase	-0.724677	5.25984	11.3583	0.00075112	0.00377188	137.588	0.71809	-0.71809	0.191523	3.74937	0.000177279	0.000456816	-0.721384	0.0547927	0.00483189	0.0298123	1	0	FALSE
RS03755	bifunctional_32C4-dihydroxy-2-butanone-4-phosphate_synthase/GTP_cyclohydrolase_II	-0.657462	6.8094	13.9783	0.000184931	0.00109741	401.559	0.674108	-0.674108	0.145611	4.6295	3.66542e-06	1.18721e-05	-0.665785	0.0709349	0.0141022	0.0425185	1	0	FALSE
RS03760	62C7-dimethyl-8-ribityllumazine_synthase	-0.767848	6.12199	28.2479	1.06732e-07	1.07975e-06	249.425	0.785784	-0.785784	0.138138	5.68838	1.28252e-08	5.52562e-08	-0.776816	0.063774	0.00875945	0.0362667	1	0	FALSE
RS03765	lysine--tRNA_ligase	0.501333	10.0843	47.0569	6.89554e-12	1.17321e-10	3858.11	-0.452667	0.452667	0.0641345	-7.05808	1.68816e-12	1.04077e-11	0.477	0.10505	0.135491	0.12027	1	0	FALSE
RS03770	haloacid_dehalogenase	0.413658	7.93953	21.2388	4.05473e-06	3.26121e-05	870.937	-0.364154	0.364154	0.0867254	-4.19893	2.68181e-05	7.79339e-05	0.388906	0.0827077	0.030586	0.0566468	1	0	FALSE
RS03775	histidine_phosphatase_family_protein	0.00451357	6.84056	0.00166763	0.967426	1	406.612	0.0401537	-0.0401537	0.106536	0.376903	0.706246	0.771336	-0.0178201	0.0712595	0.0142796	0.0427695	0	0	FALSE
RS03780	aminoacyl-tRNA_deacylase	0.169711	5.97529	1.47229	0.224984	0.423674	221.815	-0.120262	0.120262	0.137647	-0.873705	0.382279	0.48156	0.144987	0.0622458	0.0077898	0.0350178	0	0	FALSE
RS03785	epimerase	0.122741	5.82347	0.584901	0.444398	0.664548	199.901	-0.0757641	0.0757641	0.152743	-0.496023	0.619878	0.705428	0.0992526	0.0606643	0.00702022	0.0338422	0	0	FALSE
RS03790	N-acetylmuramoyl-L-alanine_amidase	0.313063	8.76022	12.9942	0.00031245	0.00173361	1541.03	-0.265659	0.265659	0.0771295	-3.44432	0.000572501	0.00136668	0.289361	0.0912569	0.0541188	0.0726879	1	0	FALSE
RS03795	ECF_transporter_S_component	-0.316357	7.83925	13.4311	0.000247492	0.00143369	817.194	0.356856	-0.356856	0.0841402	4.24121	2.2232e-05	6.55694e-05	-0.336607	0.081663	0.0286987	0.0551808	1	0	FALSE
RS03800	hypothetical_protein	-0.263014	9.3083	8.10457	0.00441539	0.0183792	2263.75	0.303462	-0.303462	0.0835145	3.63364	0.000279448	0.000698268	-0.283238	0.0969663	0.0794995	0.0882329	1	0	FALSE
RS03805	oligoendopeptidase_F	-0.516288	9.45181	41.8843	9.68348e-11	1.43658e-09	2504.39	0.556083	-0.556083	0.0739145	7.52333	5.33994e-14	3.80135e-13	-0.536186	0.0984613	0.0879504	0.0932059	1	0	FALSE
RS03810	phosphoenolpyruvate_carboxylase	0.395633	10.4203	28.8038	8.00947e-08	8.25722e-07	4875.02	-0.347878	0.347878	0.0672482	-5.17304	2.30314e-07	8.6488e-07	0.371755	0.10855	0.171204	0.139877	1	0	FALSE
RS03815	cell_division_protein	0.101315	8.76081	1.39188	0.238087	0.443203	1544.19	-0.0556666	0.0556666	0.079397	-0.701118	0.48323	0.583117	0.0784906	0.091263	0.0542296	0.0727463	0	0	FALSE
RS03820	elongation_factor_Tu	0.0418784	14.9582	0.413902	0.519996	0.734271	113501	0.00295531	-0.00295531	0.0550999	0.0536355	0.957226	0.968481	0.0194615	0.155823	3.986	2.07091	0	0	FALSE
RS03825	triose-phosphate_isomerase	0.119638	12.3279	3.9491	0.0468963	0.131601	18322.7	-0.0742379	0.0742379	0.0508455	-1.46007	0.144272	0.212752	0.0969378	0.128422	0.643468	0.385945	0	0	FALSE
RS03830	22C3-bisphosphoglycerate-dependent_phosphoglycerate_mutase	0.210301	13.1705	7.82225	0.00516069	0.0208918	32854.8	-0.164663	0.164663	0.0693172	-2.3755	0.0175254	0.0321059	0.187482	0.1372	1.15381	0.645506	1	0	FALSE
RS03835	penicillin-binding_protein_2B	-0.545388	10.1695	64.8201	8.20564e-16	1.96693e-14	4118.54	0.587443	-0.587443	0.0590707	9.94474	2.65876e-23	3.43902e-22	-0.566416	0.105937	0.144637	0.125287	1	0	FALSE
RS03840	recombination_protein_RecR	-0.159461	8.9935	4.03081	0.0446764	0.126983	1817.89	0.20313	-0.20313	0.0730926	2.77908	0.00545132	0.0110617	-0.181296	0.0936871	0.0638415	0.0787643	0	0	FALSE
RS03845	D-alanine--D-alanine_ligase	0.347571	10.1559	28.3476	1.01373e-07	1.03197e-06	4059.05	-0.300977	0.300977	0.0588954	-5.11037	3.21532e-07	1.1916e-06	0.324274	0.105796	0.142548	0.124172	1	0	FALSE
RS03850	UDP-N-acetylmuramoyl-tripeptide--D-alanyl-D-alanine_ligase	-0.298999	9.48175	17.8699	2.36537e-05	0.000167295	2552.89	0.342084	-0.342084	0.0637001	5.37023	7.86384e-08	3.11251e-07	-0.320541	0.0987732	0.0896539	0.0942136	1	0	FALSE
RS03855	MFS_transporter	0.712962	6.22344	34.5355	4.18547e-09	5.14305e-08	262.538	-0.648811	0.648811	0.127562	-5.08624	3.65224e-07	1.34595e-06	0.680887	0.0648308	0.00921995	0.0370254	1	0	FALSE
RS03860	membrane_protein	0.744771	5.83674	39.2604	3.70884e-10	5.15635e-09	199.65	-0.679203	0.679203	0.134084	-5.06549	4.07341e-07	1.48458e-06	0.711987	0.0608024	0.00701143	0.0339069	1	0	FALSE
RS03865	cell_surface_protein	0.173735	4.8236	1.39945	0.236815	0.441342	98.6836	-0.118603	0.118603	0.177796	-0.667076	0.504724	0.602079	0.146169	0.0502484	0.00346562	0.026857	0	0	FALSE
RS03870	peptide_chain_release_factor_3	0.593518	9.03579	49.7829	1.71737e-12	3.07233e-11	1862.95	-0.543137	0.543137	0.0756349	-7.18104	6.91826e-13	4.44521e-12	0.568327	0.0941276	0.0654241	0.0797758	1	0	FALSE
RS03875	helicase	-0.330342	7.45748	13.1262	0.000291193	0.0016457	626.751	0.369936	-0.369936	0.0900835	4.10659	4.01535e-05	0.000112875	-0.350139	0.077686	0.0220106	0.0498483	1	0	FALSE
RS03880	ABC_transporter_ATP-binding_protein	0.718084	5.77971	15.1169	0.000101053	0.000632035	192.168	-0.64336	0.64336	0.165489	-3.88762	0.000101233	0.000270731	0.680722	0.0602084	0.00674864	0.0334785	1	0	FALSE
RS03890	hypothetical_protein	0.69255	6.80147	20.7352	5.27387e-06	4.16602e-05	393.155	-0.630678	0.630678	0.131822	-4.78431	1.71579e-06	5.79446e-06	0.661614	0.0708523	0.013807	0.0423297	1	0	FALSE
RS03895	RNA_helicase	0.346048	11.4688	26.9259	2.11403e-07	2.0615e-06	10087	-0.299517	0.299517	0.0570686	-5.24837	1.53448e-07	5.88516e-07	0.322783	0.119473	0.354241	0.236857	1	0	FALSE
RS03900	hypothetical_protein	0.453199	5.98617	16.6767	4.43227e-05	0.000296664	222.864	-0.396712	0.396712	0.126438	-3.13759	0.00170342	0.00375398	0.424955	0.0623591	0.00782665	0.0350929	1	0	FALSE
RS03905	methyltransferase	0.167656	6.14479	1.89932	0.168154	0.344675	249.711	-0.11941	0.11941	0.125413	-0.952131	0.34103	0.440247	0.143533	0.0640115	0.0087695	0.0363905	0	0	FALSE
RS03910	1-acyl-sn-glycerol-3-phosphate_acyltransferase	0.0548267	8.88615	0.550376	0.458164	0.677637	1685.45	-0.00997529	0.00997529	0.0705235	-0.141446	0.887517	0.913363	0.032401	0.0925688	0.0591905	0.0758797	0	0	FALSE
RS03915	competence_protein_CelA	-0.403073	0.208276	0.29106	0.589542	0.79271	2.38648	0.1551	-0.1551	0.362915	0.427373	0.669107	NA	-0.279087	0.00216965	8.38096e-05	0.00112673	0	0	FALSE
RS03920	DNA_internalization-related_competence_protein_ComEC/Rec2	-0.143573	3.37672	0.511747	0.474383	0.695495	35.6212	0.181822	-0.181822	0.259216	0.701431	0.483034	0.583117	-0.162697	0.0351759	0.00125096	0.0182134	0	0	FALSE
RS03925	haloacid_dehalogenase	-0.319603	6.1027	6.68672	0.00971337	0.0358886	244.294	0.355674	-0.355674	0.127665	2.786	0.00533622	0.0108721	-0.337639	0.063573	0.00857926	0.0360761	1	0	FALSE
RS03930	LacI_family_transcriptional_regulator	-0.338445	7.08219	13.0313	0.000306334	0.00170943	483.113	0.378181	-0.378181	0.0951773	3.97343	7.08441e-05	0.00019338	-0.358313	0.0737765	0.0169662	0.0453714	1	0	FALSE
RS03935	hypothetical_protein	-0.511943	8.23947	29.3987	5.89186e-08	6.23256e-07	1080.14	0.549346	-0.549346	0.0865275	6.3488	2.16997e-10	1.10112e-09	-0.530645	0.0858321	0.0379329	0.0618825	1	0	FALSE
RS03940	methyltransferase	0.0751447	5.28937	0.332235	0.564346	0.77203	137.757	-0.0224217	0.0224217	0.155671	-0.144033	0.885474	0.912209	0.0487832	0.0551004	0.00483781	0.0299691	0	0	FALSE
RS03945	DNA_polymerase_III_subunit_delta	0.155438	7.91201	2.74522	0.0975456	0.232903	855.963	-0.1092	0.1092	0.0860906	-1.26844	0.204642	0.286008	0.132319	0.0824209	0.0300602	0.0562406	0	0	FALSE
RS03950	superoxide_dismutase_[Mn/Fe]	-0.273764	11.3357	8.27228	0.00402548	0.016974	9230.51	0.314154	-0.314154	0.0825505	3.8056	0.000141461	0.000370797	-0.293959	0.118086	0.324162	0.221124	1	0	FALSE
RS03955	transcription_antiterminator_BglG	0.279852	2.89601	1.15553	0.282395	0.493405	24.398	-0.181748	0.181748	0.300728	-0.604362	0.545603	0.641409	0.2308	0.0301683	0.000856823	0.0155126	0	0	FALSE
RS03960	PTS_beta-glucoside_transporter_subunit_EIIBCA	0.795824	3.30927	12.9499	0.000319934	0.00176909	32.4114	-0.645664	0.645664	0.276154	-2.33806	0.0193842	0.0350653	0.720744	0.0344733	0.00113824	0.0178058	1	0	FALSE
RS03965	6-phospho-beta-glucosidase	-0.0110685	5.4503	0.00662343	0.935136	1	153.75	0.0487241	-0.0487241	0.153043	0.318368	0.750206	0.805129	-0.0298963	0.0567769	0.00539947	0.0310882	0	0	FALSE
RS03970	PucR_family_transcriptional_regulator	-0.394579	6.87955	13.0327	0.000306097	0.00170943	419.541	0.431041	-0.431041	0.10655	4.04543	5.22282e-05	0.000144761	-0.41281	0.0716656	0.0147337	0.0431996	1	0	FALSE
RS03975	glycerate_kinase	1.03071	3.21536	20.0132	7.69112e-06	5.84766e-05	29.8755	-0.829094	0.829094	0.284081	-2.91851	0.00351711	0.00740465	0.929899	0.033495	0.00104918	0.0172721	1	0	FALSE
RS03980	gluconate_proton_symporter	0.442426	3.87497	2.36551	0.124043	0.277714	50.5149	-0.339154	0.339154	0.264595	-1.28178	0.199918	0.280396	0.39079	0.0403663	0.00177401	0.0210701	0	0	FALSE
RS03985	hypothetical_protein	-0.0392274	7.16053	0.172147	0.678211	0.859634	508.515	0.0825698	-0.0825698	0.0952806	0.866596	0.386163	0.485705	-0.0608986	0.0745926	0.0178583	0.0462254	0	0	FALSE
RS03995	tRNA_preQ1(34)_S-adenosylmethionine_ribosyltransferase-isomerase_QueA	0.276573	8.63229	6.31088	0.0119999	0.0427465	1410.64	-0.229291	0.229291	0.0949681	-2.4144	0.0157612	0.0291509	0.252932	0.0899242	0.0495395	0.0697319	1	0	FALSE
RS04000	membrane_protein	-0.907851	8.43089	15.2705	9.31582e-05	0.000591014	1236.85	0.79958	-0.79958	0.287022	2.78578	0.0053399	0.0108721	-0.853715	0.0878262	0.0434365	0.0656313	1	0	FALSE
RS04005	glucosamine-6-phosphate_deaminase	-0.241554	8.88706	4.46416	0.0346131	0.103839	1690.34	0.281841	-0.281841	0.100815	2.79562	0.0051801	0.0105794	-0.261697	0.0925782	0.0593622	0.0759702	0	0	FALSE
RS04010	glutathione-dependent_reductase	-0.856011	7.22504	76.646	2.04523e-18	6.18142e-17	536.111	0.887107	-0.887107	0.0959841	9.24223	2.41421e-20	2.63963e-19	-0.871559	0.0752647	0.0188274	0.0470461	1	0	FALSE
RS04015	16S_rRNA_pseudouridine(516)_synthase	0.165628	5.27614	1.45271	0.228093	0.428533	135.971	-0.115529	0.115529	0.15916	-0.725863	0.467923	0.568808	0.140578	0.0549626	0.00477511	0.0298688	0	0	FALSE
RS04020	MFS_transporter	0.597979	10.2993	26.802	2.25406e-07	2.18491e-06	4477.11	-0.545622	0.545622	0.0974062	-5.60152	2.12485e-08	8.92796e-08	0.5718	0.107289	0.15723	0.13226	1	0	FALSE
RS04025	competence_protein_CoiA	-0.763796	4.03788	19.0404	1.27981e-05	9.393e-05	58.4392	0.746564	-0.746564	0.219914	3.3948	0.0006868	0.00162581	-0.75518	0.0420634	0.0020523	0.0220578	1	0	FALSE
RS04030	oligoendopeptidase_F	-0.206018	9.31529	5.53067	0.0186859	0.0616027	2272.98	0.249188	-0.249188	0.0763205	3.26502	0.00109457	0.00250887	-0.227603	0.0970392	0.0798239	0.0884315	0	0	FALSE
RS04035	haloacid_dehalogenase	-0.149471	6.22788	1.36277	0.243058	0.451076	265.731	0.190267	-0.190267	0.12606	1.50934	0.131212	0.196035	-0.169869	0.064877	0.00933209	0.0371046	0	0	FALSE
RS04040	O-methyltransferase	0.00271762	8.28147	0.00063425	0.979908	1	1107.64	0.0408936	-0.0408936	0.0937984	0.435974	0.662856	0.739871	-0.019088	0.0862696	0.0388988	0.0625842	0	0	FALSE
RS04045	foldase	-0.31749	10.4515	17.2922	3.205e-05	0.000219965	5000.55	0.360512	-0.360512	0.0645192	5.58767	2.30141e-08	9.62896e-08	-0.339001	0.108876	0.175612	0.142244	1	0	FALSE
RS04050	hypothetical_protein	0.240729	7.66402	6.23657	0.0125139	0.0442212	719.66	-0.192553	0.192553	0.0895133	-2.15111	0.0314675	0.0544831	0.216641	0.0798376	0.0252734	0.0525555	0	0	FALSE
RS04055	alanine--tRNA_ligase	0.426209	10.3069	44.1615	3.02376e-11	4.67098e-10	4504.88	-0.378993	0.378993	0.0573069	-6.61338	3.75631e-11	2.03107e-10	0.402601	0.107369	0.158205	0.132787	1	0	FALSE
RS04060	membrane_protein	0.318511	7.41987	10.3655	0.00128389	0.00613092	607.107	-0.269047	0.269047	0.0961036	-2.79956	0.00511728	0.0104727	0.293779	0.0772943	0.0213207	0.0493075	1	0	FALSE
RS04065	glycosyl_transferase	-0.765543	5.90393	35.7075	2.2928e-09	2.89786e-08	214.002	0.786026	-0.786026	0.134913	5.82616	5.67161e-09	2.51662e-08	-0.775784	0.0615024	0.00751543	0.0345089	1	0	FALSE
RS04070	hypothetical_protein	-0.242278	0.262057	0.11026	0.739848	0.901647	2.53917	0.109901	-0.109901	0.366726	0.299681	0.764421	0.81557	-0.17609	0.0027299	8.91718e-05	0.00140954	0	0	FALSE
RS04075	hypothetical_protein	-0.337818	1.40323	0.577783	0.447182	0.666051	7.36934	0.190225	-0.190225	0.385544	0.493394	0.621734	0.707133	-0.264022	0.0146177	0.0002588	0.00743825	0	0	FALSE
RS04080	transcriptional_regulator	0.156936	0.882421	0.0839122	0.772064	0.924917	4.48349	-0.0756035	0.0756035	0.388986	-0.19436	0.845894	0.881529	0.11627	0.00919235	0.000157454	0.0046749	0	0	FALSE
RS04085	membrane_protein	-0.239565	3.17125	1.22328	0.268718	0.482541	30.2202	0.222362	-0.222362	0.276392	0.804518	0.421098	0.523134	-0.230963	0.0330355	0.00106129	0.0170484	0	0	FALSE
RS04090	energy-coupled_thiamine_transporter_ThiT	0.481329	7.23434	21.4586	3.61557e-06	2.93222e-05	532.991	-0.429771	0.429771	0.101118	-4.25018	2.13595e-05	6.30904e-05	0.45555	0.0753615	0.0187178	0.0470397	1	0	FALSE
RS04095	ribonucleoside-diphosphate_reductase	-0.386118	11.5467	39.6358	3.06026e-10	4.29142e-09	10691.1	0.429119	-0.429119	0.0525281	8.16933	3.10097e-16	2.56771e-15	-0.407619	0.120284	0.375457	0.247871	1	0	FALSE
[truncated: 894 more rows]
