# Supplementary material for: Cas9 Contributes to Group B Streptococcal Colonization and Disease
Source: Front Microbiol. 2019 Aug 21;10:1930. doi: 10.3389/fmicb.2019.01930 (PMC6712506; doi:10.3389/fmicb.2019.01930)
Supplement: Supplementary file 8 [file Table_5.XLSX]

## Sheet: Cloning & Sequencing Primers
Supplementary Table 5. Primers used in this study for cloning, sequencing, and qRT-PCR
*Primer names beginning with the number "5" indicate a forward primer, and primer names beginning with the number "3" indicate a reverse primer
	Primer name	description	sequence (5'--> 3')
cas9 Knock-out construct	Cas9_5flank_F	5' flanking region forward	GAATGGACATTTAATGAAGGAT
	Cas9_5flank_R	5' flanking region reverse	TTCCGATGTCGAGACCTATTG
	Cas9_3flank_F	3' flanking region forward	GGAGAAGATTGATATGGCAGGTTG
	Cas9_3flank_R	3' flanking region reverse	CTTTAAGCCGACCTATCATAGCA
	Cat_cas9_F	cat with 5' cas9 region overhang	CAATAGGTCTCGACATCGGAAATGGAGAAAAAAATCACTGGAT
	Cat_cas9_R	cat with 3' cas9 region overhang	TGCCATATCAAT CTTCTCCTTACGCCCCGCCCTGCCACT
	Cas9_nest_F	5’flank forward_nest+Xho I	CCGCTCGAGTTGCTTGGTTGATCTATCCTA
	Cas9_nest_R	3’flank reverse_nest+XbaI	GCTCTAGAGAATCCCATTCCCATCACTA
Confirm ligation of KO-construct into pHY304	T3	flank the pHY304 MCS site, fwd	ATTAACCCTCACTAAAGG
	T7	flank the pHY304 MCS site, rev	TAATACGACTCACTATAGGG
1st cross-over confirmation	MR20	internal to cat; to confirm 1st cross-over transformants	ATCCAGCTGAACGGTCTGGTT
	MR21	internal to cat; to confirm 1st cross-over transformants	ATACGCAAGGCGACAAGGTGCT
CRISPR/cas9 sequencing primers	5002	cas9 internal sequencing primer	TGAACATAGAGAGGACTTGAAACAG
	5003	cas9 internal sequencing primer	CTATCGCCGTCACTATACTGG
	5004	cas9 internal sequencing primer	GGCAAGATTTATCCAACGTCAG
	5005	cas9 internal sequencing primer	TCGTCGATTACTTGCTAGTGC
	3002	cas9 internal sequencing primer	CTTACGATGTTCCTTGAATACTCC
	3003	cas9 internal sequencing primer	GCGCCAAGATTGATTCCTTAG
	Cas9_internal_F	cas9 internal sequencing primer_forward	TCTTTGCAACAATGCAGGAG
	Cas9_internal_R	cas9 internal sequencing primer_reverse	AGAATGCTTTGCGTGCTTTT
	5039	outside cas9 sequencing primer	CTTTATTAGAAGCCGCAACG
	5040	sequencing primer in csn2	TCGTTAAGTGTGGTTGCATG
cas9 complementation into pDCERm overexpression vector	5001	cas9 complementation construct 5' primer containing SacII site	ATATATCCGCGGTAGCGCTTGCATTTTGTTTGC
	3001	cas9 complementation construct 3' primer containing BamH1 site	ATATATGGATCCTCAATCTTCTCCTAACTTACCC

## Sheet: qRT-PCR primers
Supplementary Table 5. Primers used in this study for cloning, sequencing, and qRT-PCR
Primer name	sequence (5'--> 3')
gyrA FWD (RS04665)	AGCACAAAAACGTGGAGGAC
gyrA REV (RS04665)	ACGATAGGGAGGCCTTTAGC
RibD FWD (RS03745)	AATGGGTTGCCGTTTGATTAAGG
RibD REV (RS03745)	AGGCTATCAATCCCTTCTTGTC
RibA FWD (RS03755)	CCAACAAATAGAGGCTGAAGG
RibA REV (RS03755)	AGTTGAGCACTAACTCCATAGTC
essA FWD (RS05110)	GTACCAAACTAATGAGAACC
essA REV (RS05110)	GTTACAAGAACAGAAGAAGC
esaB FWD (RS05105)	TCCTCTATCCTTATACGATCACC
esaB REV (RS05105)	AGCGTTAAGCAATTAGTAATGG
essB FWD (RS05100)	ACGTTTGGCAGCATCAATAGC
essB REV (RS05100)	AGAAGTACGAGTTGGCCTATTC
DUF1836 FWD (RS06255)	TACAATCGCCGTCAAGTAGC
DUF1836 REV (RS06255)	TGTTCATACAAGCAGCAAATCC
hly3 FWD (RS06260)	CTGTCGCATTGTCACTTATTGG
hly3 REV (RS06260)	ACCAGCCATCCCATAATGAG
cas9 FWD (RS04480)	CTTATTATGTCGGGCCACTAGC
cas9 REV (RS04480)	AGAGGTCATTGTTGGTCATACG
RS1805 FWD (LuxS-like)	CTTTAAGGCATCAGACTTTGGTG
RS1805 REV (LuxS-like)	ATGCAAATCACGCCCTATACG
RS09595 FWD (BaeR-like)	GCCTGGAACTAATGGTTTAGATG
RS09595 REV (BaeR-like)	CATCAAGGCGTTTGAACAATGC
RS09600 FWD (BaeS-like)	GAGCCAAGAAATGGCAAATCG
RS09600 REV (BaeS-like)	TCGGCATCAATAATACCCTCTTG
RS04840 fwd (NsrR)	CTGTATTAGATGCTAAGCTAACTGC
RS04840 rev (NsrR)	CTTGTTTAGGATGCATGAGCAAG
RS04845 fwd (NsrK)	TCGAACTTCAACCGAGTGATTAC
RS04845 rev (NsrK)	GGGCCATTAATGAAATAGCTGC
RS04885 fwd (CiaR)	GACCGCTAAAGAAAGCATTGATG
RS04885 rev (CiaR)	ACATGTCTACGCGAATATCACC
RS04880 fwd (CiaH)	AATCGCCTAGAAACGCTATTCAG
RS04880 rev (CiaH)	TTCCATCATCACGTCTTGCTAAG
